# Supplementary material for: Learning of probabilistic punishment as a model of anxiety produces changes in action but not punisher encoding in the dmPFC and VTA
Source: eLife. 2022 Sep 14;11:e78912. doi: 10.7554/eLife.78912 (PMC9525102; doi:10.7554/eLife.78912)
Supplement: Figure 1—source data 1. [file elife-78912-fig1-data1.xlsx]

## Sheet: Figure1
			1C-right and Supplement 2-1A											1D-right and Supplement 2-1B										1E-right and Supplement 2-1C
	Metric: percent of trials completed											Metric: latency to action											Metric: latency to retrieve pellet
				Session 1											Session 1											Session 1
	256	257	251	252	264	318	320	321				256	257	251	252	264	318	320	321			Subj	256	257	251	252	264	318	320	321
No risk	100	100	100	100	100	100	100	100			No risk	7.516	29.4313	6.00667	11.5927	15.536	8.67667	6.16	11.2033			No risk	2.00759	2.48897	1.21103	1.50345	2.28	1.68483	2.14966	1.66069
Risk	81.6667	100	100	58.3333	100	100	100	100			Risk	51.9952	16.6367	35.1493	199.121	19.291	7.698	44.0307	27.455			Risk	2.31339	1.2969	1.48793	4.04276	4.91965	1.94241	4.15966	1.97586
				Session 2											Session 2											Session 2
	256	257	251	252	264	318	320	321				256	257	251	252	264	318	320	321				256	257	251	252	264	318	320	321
No risk	100	100	100	100	100	100	100	100			No risk	13.5227	4.03667	5.23	7.31933	20.13	3.748	5.64733	6.00867			No risk	2.25655	1.37655	1.62276	1.8269	3.59517	1.60414	2.13448	1.60897
Risk	25	50	25	51.6667	66.6667	100	53.3333	100			Risk	259.319	115.276	48.5067	175.849	300.853	3.81633	356.672	108.024			Risk	2.13867	1.49724	1.10933	1.29828	4.00852	1.66104	2.04776	2.02828
				Session 3											Session 3											Session 3
	256	257	251	252	264	318	320	321				256	257	251	252	264	318	320	321				256	257	251	252	264	318	320	321
No risk	100	100	100	100	100	100	100	100			No risk	115.751	28.6587	5.38533	4.21133	9.23867	3.71933	19.3927	3.21733			No risk	2.51793	1.63379	1.61172	2.08138	2.1731	1.6531	2.37655	2.02276
Risk	8.33333	8.33333	56.6667	90	83.3333	100	55	100			Risk	10.788	282.952	239.16	178.87	149.232	2.52733	164.046	12.0637			Risk	1.964	1.796	1.35138	1.46553	2.33545	1.48793	1.67379	1.48448
