# Supplementary material for: Learning of probabilistic punishment as a model of anxiety produces changes in action but not punisher encoding in the dmPFC and VTA
Source: eLife. 2022 Sep 14;11:e78912. doi: 10.7554/eLife.78912 (PMC9525102; doi:10.7554/eLife.78912)
Supplement: Figure 2—source data 1. [file elife-78912-fig2-data1.xlsx]

## Sheet: Figure2A,B,C- Supp 2-2
																										Cue (dmpfc)
Block (Block 1= 0%, Block 2=6%, block3=10%)	1	1	1	1	1	1	1	2	2	2	2	2	2	2	2	3	3	3	3	3	3	3	3	1	1	1	1	1	1	1	1	1	2	2	2	2	2	2	2	2	2	3	3	3	3	3	1	1	1
Session	1	1	1	1	1	1	1	1	1	1	1	1	1	1	1	1	1	1	1	1	1	1	1	2	2	2	2	2	2	2	2	2	2	2	2	2	2	2	2	2	2	2	2	2	2	2	3	3	3
Subject	S251	S256	S257	S283	S318	S320	S321	S251	S252	S256	S257	S283	S318	S320	S321	S251	S252	S256	S257	S283	S318	S320	S321	S251	S252	S256	S257	S283	S318	S320	S321	S264	S251	S252	S256	S257	S283	S318	S320	S321	S264	S252	S318	S320	S321	S263	S251	S252	S256
Time (peri-cue-sec)	Z-score of df/f	Z-score of df/f	Z-score of df/f	Z-score of df/f	Z-score of df/f	Z-score of df/f	Z-score of df/f	Z-score of df/f	Z-score of df/f	Z-score of df/f	Z-score of df/f	Z-score of df/f	Z-score of df/f	Z-score of df/f	Z-score of df/f	Z-score of df/f	Z-score of df/f	Z-score of df/f	Z-score of df/f	Z-score of df/f	Z-score of df/f	Z-score of df/f	Z-score of df/f	Z-score of df/f	Z-score of df/f	Z-score of df/f	Z-score of df/f	Z-score of df/f	Z-score of df/f	Z-score of df/f	Z-score of df/f	Z-score of df/f	Z-score of df/f	Z-score of df/f	Z-score of df/f	Z-score of df/f	Z-score of df/f	Z-score of df/f	Z-score of df/f	Z-score of df/f	Z-score of df/f	Z-score of df/f	Z-score of df/f	Z-score of df/f	Z-score of df/f	Z-score of df/f	Z-score of df/f	Z-score of df/f	Z-score of df/f
-1.5128	0.43302	-0.096464	-0.116902	0.215639	-0.00511471	0.31463	-0.608223	0.282533	-0.376687	0.703561	-0.0197972	-0.178156	-0.705192	0.279598	-0.084629	0.338495	0.610434	0.870176	0.520451	-1.99835	-0.286793	0.754422	0.435678	-0.100424	0.764971	0.781454	0.31015	0.982049	-0.45128	-0.447067	0.0527424	0.101906	0.650034	0.156372	-0.61745	-0.301554	-0.456401	0.314069	0.394323	0.0102994	0.580441	-1.51171	0.296082	1.24485	0.297898	-0.384655	0.205088	0.0627605	-0.544269
-1.4884	0.459239	-0.129525	-0.172983	0.23874	-0.0454532	0.281677	-0.618271	0.288189	-0.349752	0.725869	0.011022	-0.158047	-0.776213	0.250664	-0.0781838	0.334478	0.635965	0.827548	0.451665	-1.94627	-0.332203	0.761759	0.521273	-0.116639	0.808227	0.780193	0.330181	1.04328	-0.414673	-0.422249	0.125975	0.154607	0.609043	0.160123	-0.609956	-0.295994	-0.443823	0.289778	0.4276	0.00476488	0.558564	-1.48056	0.350163	1.14205	0.27746	-0.382202	0.232262	0.0695102	-0.553503
-1.464	0.485126	-0.154686	-0.228682	0.259147	-0.0863449	0.240465	-0.585871	0.292505	-0.325863	0.737427	0.0379662	-0.135095	-0.849815	0.217866	-0.0967767	0.337552	0.654558	0.790536	0.365953	-1.90984	-0.36911	0.76746	0.596371	-0.138134	0.854174	0.771433	0.337144	1.09619	-0.37373	-0.406922	0.183402	0.21318	0.554456	0.150959	-0.596133	-0.272261	-0.420135	0.269995	0.459114	0.00561647	0.53832	-1.42881	0.402026	1.0373	0.267	-0.37932	0.261091	0.0625308	-0.556268
-1.4396	0.511011	-0.169334	-0.279283	0.276594	-0.115985	0.194602	-0.514478	0.295233	-0.305229	0.739818	0.0576126	-0.11117	-0.917391	0.182906	-0.133311	0.350033	0.668961	0.765379	0.271052	-1.88955	-0.394331	0.772159	0.643162	-0.161299	0.901167	0.75966	0.335023	1.14144	-0.332387	-0.402783	0.212011	0.276784	0.489539	0.128172	-0.575844	-0.234177	-0.389265	0.254174	0.487672	0.0123644	0.521323	-1.37373	0.452115	0.940135	0.275641	-0.375269	0.2915	0.0454967	-0.555764
-1.4152	0.536922	-0.173358	-0.319603	0.292414	-0.127101	0.148085	-0.416863	0.296748	-0.286096	0.732793	0.0674984	-0.0884988	-0.97566	0.14853	-0.177314	0.37307	0.682448	0.756692	0.175238	-1.8837	-0.407473	0.7773	0.651076	-0.182211	0.944764	0.749199	0.328254	1.17903	-0.294146	-0.410029	0.205288	0.34365	0.418914	0.0968681	-0.552253	-0.185262	-0.355047	0.239211	0.51145	0.0220514	0.508	-1.32867	0.502468	0.856976	0.303616	-0.369038	0.32329	0.0249822	-0.555896
-1.3908	0.562629	-0.168413	-0.34472	0.308454	-0.117109	0.103815	-0.311535	0.297479	-0.266272	0.714656	0.0663227	-0.069063	-1.02353	0.118556	-0.220591	0.406362	0.699156	0.765682	0.090488	-1.88807	-0.409094	0.785834	0.620645	-0.197064	0.980999	0.742736	0.319797	1.20833	-0.262114	-0.42756	0.171074	0.410747	0.347567	0.065138	-0.529681	-0.126648	-0.320781	0.220323	0.528562	0.0283673	0.497202	-1.29739	0.555969	0.791724	0.344189	-0.360336	0.357018	0.00778889	-0.559494
-1.3664	0.587892	-0.156274	-0.351759	0.325988	-0.0873672	0.0631198	-0.220149	0.297718	-0.244588	0.683335	0.0533545	-0.0542411	-1.06034	0.0974188	-0.25686	0.447733	0.722976	0.789074	0.029173	-1.89725	-0.398988	0.801921	0.55865	-0.202584	1.0078	0.741493	0.310359	1.2285	-0.239071	-0.453474	0.129672	0.473438	0.279758	0.039182	-0.510087	-0.0579506	-0.289353	0.193335	0.537965	0.0232875	0.48672	-1.27674	0.615054	0.747037	0.388462	-0.349507	0.39441	-0.00202356	-0.566867
-1.342	0.612597	-0.138351	-0.341471	0.345424	-0.0433666	0.0262799	-0.158645	0.297619	-0.221041	0.638659	0.0277457	-0.044757	-1.08606	0.0891571	-0.281419	0.49315	0.753562	0.820807	-0.00253066	-1.90676	-0.377193	0.829935	0.476532	-0.196377	1.0249	0.742497	0.298798	1.2392	-0.227451	-0.485572	0.0997516	0.52618	0.218471	0.0213244	-0.492165	0.0187878	-0.263078	0.156511	0.539322	0.00313776	0.47488	-1.26161	0.681202	0.724786	0.429001	-0.337081	0.437962	-0.00345654	-0.576376
-1.3176	0.636614	-0.115985	-0.318191	0.366781	0.00626552	-0.00690156	-0.127884	0.297078	-0.197717	0.58368	-0.0118468	-0.0406685	-1.10151	0.0965467	-0.291962	0.537573	0.783124	0.856117	-0.00607728	-1.91418	-0.346285	0.873362	0.391293	-0.177337	1.03393	0.736098	0.28298	1.2407	-0.229329	-0.521434	0.0858985	0.564104	0.165161	0.0106307	-0.471659	0.0968366	-0.243167	0.110874	0.531946	-0.0277059	0.461726	-1.24917	0.754811	0.725811	0.461561	-0.323332	0.490058	0.00353949	-0.585988
-1.2932	0.659598	-0.0905733	-0.288087	0.38999	0.0515276	-0.0366489	-0.116261	0.295535	-0.179259	0.523898	-0.0651691	-0.0413939	-1.10787	0.120712	-0.28916	0.576324	0.797748	0.894514	0.0145943	-1.91903	-0.312695	0.933795	0.322437	-0.146082	1.03774	0.710909	0.260693	1.23345	-0.245939	-0.558251	0.0804989	0.584707	0.119593	0.00425155	-0.44439	0.166539	-0.229406	0.059359	0.514495	-0.0608571	0.448492	-1.24335	0.835316	0.748875	0.486477	-0.308294	0.552314	0.0194535	-0.594299
-1.2688	0.680574	-0.0641075	-0.257579	0.414495	0.0807502	-0.0626714	-0.108259	0.291893	-0.170605	0.465646	-0.128035	-0.0459494	-1.10507	0.160798	-0.275399	0.606256	0.781519	0.939089	0.0566428	-1.92209	-0.285115	1.01045	0.284883	-0.105051	1.03932	0.662712	0.230302	1.21772	-0.277024	-0.593162	0.0737209	0.588928	0.0800847	-0.000636757	-0.410367	0.219118	-0.220274	0.00558038	0.486057	-0.0905204	0.436281	-1.25678	0.921262	0.789921	0.506799	-0.29206	0.625514	0.0429151	-0.600779
-1.2444	0.697288	-0.0401973	-0.232066	0.438883	0.080236	-0.0840651	-0.0896409	0.28481	-0.174582	0.415171	-0.193555	-0.0533237	-1.0922	0.21379	-0.253504	0.626075	0.720855	0.992716	0.116828	-1.92425	-0.270513	1.10025	0.279481	-0.057978	1.04034	0.596601	0.190768	1.19405	-0.320772	-0.623903	0.0609915	0.580877	0.0445867	-0.00560923	-0.373351	0.250326	-0.213328	-0.0469052	0.447292	-0.114452	0.425324	-1.30702	1.00972	0.842449	0.524595	-0.275246	0.709912	0.0682716	-0.605699
-1.22	0.70618	-0.0241166	-0.214203	0.461299	0.0391272	-0.100385	-0.0531488	0.273563	-0.192555	0.378067	-0.254572	-0.0626239	-1.06847	0.275208	-0.227026	0.635862	0.608691	1.05539	0.189935	-1.92544	-0.271652	1.19846	0.291092	-0.0089132	1.03904	0.523184	0.141649	1.16402	-0.374151	-0.648902	0.0437528	0.566287	0.0122354	-0.0121207	-0.338586	0.261368	-0.205624	-0.0946401	0.400305	-0.130739	0.414957	-1.40967	1.09567	0.899302	0.541469	-0.259602	0.805206	0.0878787	-0.60997
-1.1956	0.703533	-0.0210513	-0.203429	0.480521	-0.0429525	-0.112881	-0.00168162	0.259203	-0.224998	0.357286	-0.30525	-0.072833	-1.03139	0.340495	-0.199842	0.636489	0.44757	1.12493	0.267671	-1.92429	-0.285959	1.29984	0.300485	0.0387662	1.02999	0.45413	0.0838787	1.13021	-0.433257	-0.667046	0.025542	0.550995	-0.0159916	-0.0217881	-0.313379	0.256008	-0.194085	-0.134278	0.347908	-0.137517	0.404086	-1.57128	1.17249	0.955906	0.562568	-0.247471	0.909645	0.0968363	-0.614614
-1.1712	0.687389	-0.0334763	-0.197356	0.496787	-0.15533	-0.124308	0.0550228	0.245004	-0.269047	0.351443	-0.342622	-0.0825763	-0.976218	0.406112	-0.175808	0.629345	0.249308	1.19844	0.337984	-1.91815	-0.306279	1.40024	0.295775	0.0828846	1.00776	0.397802	0.0209588	1.09556	-0.493819	-0.677661	0.0103056	0.540273	-0.0381665	-0.0338011	-0.30732	0.237855	-0.175939	-0.163013	0.293294	-0.136271	0.391956	-1.7847	1.23359	1.0125	0.596418	-0.240045	1.01898	0.0954899	-0.61981
-1.1468	0.659189	-0.059747	-0.193444	0.511497	-0.282635	-0.137816	0.104828	0.235598	-0.317239	0.35655	-0.366214	-0.0902895	-0.898419	0.469945	-0.161036	0.616181	0.0310111	1.27286	0.389785	-1.90317	-0.327598	1.49736	0.272177	0.122438	0.970222	0.358644	-0.0413103	1.06255	-0.551791	-0.680481	0.00264072	0.53823	-0.0528482	-0.0440293	-0.328407	0.211455	-0.14948	-0.179241	0.239954	-0.131365	0.378453	-2.02998	1.27403	1.07287	0.648183	-0.236505	1.12666	0.0873181	-0.62421
-1.1224	0.623824	-0.0953337	-0.190346	0.526259	-0.409298	-0.156264	0.137204	0.235268	-0.35978	0.368958	-0.376011	-0.0945984	-0.796766	0.531068	-0.165301	0.598763	-0.190451	1.34558	0.419929	-1.87439	-0.35135	1.59067	0.230736	0.157287	0.917699	0.33885	-0.0970939	1.03272	-0.603433	-0.675665	0.00456833	0.546938	-0.0599053	-0.0488823	-0.377926	0.184239	-0.114739	-0.182946	0.191275	-0.124524	0.363709	-2.27931	1.29095	1.14062	0.715001	-0.234604	1.22553	0.0750894	-0.624918
-1.098	0.587556	-0.135638	-0.188435	0.542479	-0.522978	-0.182039	0.147291	0.246039	-0.387654	0.386527	-0.372214	-0.0946211	-0.673719	0.589055	-0.195613	0.578141	-0.403225	1.41522	0.434711	-1.82685	-0.379771	1.68065	0.182265	0.187729	0.852415	0.33634	-0.142126	1.0065	-0.645056	-0.663952	0.0112865	0.566201	-0.0603838	-0.0495708	-0.448546	0.164729	-0.0734281	-0.175578	0.149903	-0.112797	0.347904	-2.50383	1.28356	1.21613	0.787561	-0.231647	1.30989	0.0612006	-0.618111
-1.0736	0.555279	-0.177611	-0.18925	0.56142	-0.61964	-0.216705	0.138115	0.26626	-0.395392	0.40892	-0.356591	-0.0902548	-0.533101	0.643711	-0.247433	0.55408	-0.601773	1.4818	0.445402	-1.75768	-0.411911	1.76804	0.143816	0.213988	0.779993	0.343303	-0.173369	0.983449	-0.673496	-0.646568	0.0119115	0.594078	-0.0556959	-0.0510317	-0.525776	0.15821	-0.0282974	-0.159487	0.117143	-0.0931842	0.33159	-2.68054	1.25402	1.29706	0.853274	-0.225072	1.37681	0.0503605	-0.60033
-1.0492	0.52915	-0.218866	-0.195184	0.583982	-0.702251	-0.260167	0.119166	0.290915	-0.382133	0.437039	-0.332866	-0.0823091	-0.381688	0.695493	-0.304787	0.525414	-0.78423	1.54578	0.461332	-1.668	-0.444509	1.85334	0.124841	0.235837	0.708537	0.351062	-0.188836	0.962828	-0.687004	-0.624875	-0.0043878	0.627395	-0.0470637	-0.0580833	-0.592121	0.164353	0.0173691	-0.137134	0.0924585	-0.0696277	0.315545	-2.79613	1.20774	1.38143	0.900891	-0.21306	1.42601	0.0480758	-0.569998
-1.0248	0.508973	-0.256307	-0.209323	0.610321	-0.772068	-0.310402	0.102537	0.313987	-0.349642	0.471262	-0.304985	-0.0720401	-0.233624	0.745638	-0.347042	0.491078	-0.949586	1.60723	0.486522	-1.56307	-0.470193	1.93647	0.122664	0.252476	0.6454	0.356624	-0.18814	0.94393	-0.685308	-0.600065	-0.0420157	0.662139	-0.0357984	-0.0752126	-0.634664	0.178308	0.0596595	-0.110461	0.0732815	-0.0554249	0.300094	-2.84771	1.15175	1.46866	0.927036	-0.19573	1.4588	0.0564415	-0.528309
-1.0004	0.493209	-0.286614	-0.233436	0.639892	-0.825489	-0.36455	0.0980145	0.330913	-0.300522	0.510731	-0.274474	-0.0602715	-0.108656	0.795682	-0.358169	0.450872	-1.09773	1.66619	0.522188	-1.45046	-0.478769	2.01607	0.132632	0.262727	0.594239	0.363293	-0.172775	0.926104	-0.669077	-0.572974	-0.0966297	0.694164	-0.0236433	-0.107276	-0.651673	0.194076	0.0940586	-0.0805143	0.055533	-0.0650122	0.285016	-2.84323	1.09286	1.55798	0.9371	-0.175492	1.47694	0.0725776	-0.479086
-0.976	0.479563	-0.307711	-0.265238	0.671671	-0.859127	-0.420193	0.108491	0.339352	-0.238227	0.554006	-0.239768	-0.0468732	-0.0256387	0.846727	-0.336868	0.405402	-1.23018	1.72314	0.568971	-1.33728	-0.466325	2.08919	0.151485	0.265475	0.554059	0.375265	-0.146423	0.908535	-0.639695	-0.544181	-0.157149	0.72033	-0.0124807	-0.155941	-0.651264	0.207957	0.116432	-0.047023	0.0350144	-0.101083	0.269984	-2.80231	1.03694	1.64761	0.936213	-0.15558	1.48211	0.0894973	-0.427577
-0.9516	0.465152	-0.319304	-0.29883	0.704066	-0.873704	-0.475806	0.132255	0.33863	-0.166791	0.598856	-0.198732	-0.0309352	0.00347134	0.898607	-0.297001	0.355475	-1.34875	1.77855	0.626636	-1.2284	-0.441344	2.15224	0.170958	0.260184	0.520773	0.39293	-0.114709	0.889911	-0.599214	-0.514553	-0.211641	0.739441	-0.0038108	-0.215462	-0.642886	0.219288	0.124277	-0.00852001	0.00911162	-0.152825	0.254459	-2.75366	0.988792	1.73514	0.922092	-0.139041	1.47541	0.0986492	-0.378479
-0.9272	0.446822	-0.32249	-0.327979	0.734968	-0.874805	-0.530705	0.168782	0.32901	-0.0907779	0.641843	-0.152195	-0.0114165	-0.0228659	0.949315	-0.25557	0.301626	-1.45338	1.83218	0.693155	-1.12669	-0.419184	2.20239	0.181368	0.247318	0.489059	0.413654	-0.0840205	0.868354	-0.550064	-0.485846	-0.253675	0.752272	0.00148638	-0.273518	-0.630218	0.228543	0.117033	0.0364479	-0.0225079	-0.206007	0.237378	-2.72564	0.951692	1.81803	0.89071	-0.12935	1.45718	0.0947568	-0.334267
-0.9028	0.422021	-0.319279	-0.348575	0.762357	-0.870015	-0.584629	0.216461	0.311311	-0.015731	0.679469	-0.104657	0.0122629	-0.0962887	0.995611	-0.222274	0.244138	-1.54173	1.88262	0.762563	-1.0341	-0.412689	2.23821	0.18162	0.228415	0.45359	0.435351	-0.0603402	0.84202	-0.494817	-0.460874	-0.28305	0.760578	0.00305803	-0.317647	-0.611667	0.236085	0.095514	0.0878169	-0.0586325	-0.249336	0.217878	-2.73597	0.927291	1.89453	0.844741	-0.130062	1.42727	0.0795005	-0.295034
-0.8784	0.389823	-0.312244	-0.359362	0.784892	-0.861862	-0.636904	0.267366	0.286864	0.0518056	0.70924	-0.0617018	0.0400298	-0.1987	1.03489	-0.198873	0.183548	-1.61041	1.92703	0.824202	-0.952185	-0.427558	2.2599	0.177426	0.205761	0.411195	0.455701	-0.0479269	0.810044	-0.436224	-0.443042	-0.302997	0.765732	0.000810582	-0.342642	-0.58498	0.242533	0.0614684	0.142977	-0.0977179	-0.27557	0.196376	-2.79078	0.916392	1.96409	0.792228	-0.142842	1.386	0.0598217	-0.259883
-0.854	0.351254	-0.304032	-0.361453	0.802169	-0.845994	-0.685493	0.309138	0.257441	0.104289	0.728944	-0.0276126	0.0709556	-0.30453	1.06639	-0.183702	0.121105	-1.65882	1.96176	0.866568	-0.881447	-0.461565	2.26931	0.173944	0.181779	0.36272	0.467934	-0.0483496	0.773143	-0.377235	-0.435184	-0.319593	0.768177	-0.00520574	-0.352258	-0.551397	0.2486	0.0176456	0.19654	-0.138748	-0.283449	0.174634	-2.89079	0.919087	2.02661	0.739946	-0.16669	1.33516	0.0419475	-0.228732
-0.8296	0.308729	-0.296571	-0.357376	0.814909	-0.817607	-0.726543	0.332166	0.225104	0.133873	0.735859	-0.00522944	0.102756	-0.39193	1.09063	-0.175997	0.05878	-1.69433	1.98351	0.882618	-0.821109	-0.507364	2.26911	0.176554	0.158493	0.311908	0.461768	-0.0613345	0.733545	-0.320936	-0.438294	-0.340263	0.768054	-0.0147146	-0.353841	-0.517209	0.25423	-0.0320739	0.241475	-0.181295	-0.277532	0.154857	-3.03518	0.933917	2.08217	0.689762	-0.198969	1.27848	0.0268961	-0.203069
-0.8052	0.265072	-0.290933	-0.351176	0.824794	-0.776133	-0.75538	0.335627	0.192065	0.134277	0.727393	0.00383557	0.131613	-0.451785	1.1087	-0.177654	-0.000992385	-1.73365	1.99038	0.871995	-0.770115	-0.556278	2.26186	0.192417	0.137438	0.261714	0.429395	-0.0859602	0.694242	-0.270455	-0.451096	-0.367653	0.766	-0.0273619	-0.3529	-0.490318	0.25868	-0.0831418	0.271207	-0.224947	-0.265248	0.138704	-3.22114	0.957741	2.13273	0.63919	-0.236603	1.22114	0.0116148	-0.185072
-0.7808	0.222687	-0.288593	-0.348247	0.833904	-0.723637	-0.768905	0.327118	0.160559	0.10288	0.702709	0.000548361	0.152928	-0.486287	1.12283	-0.190432	-0.0555755	-1.79813	1.98225	0.840118	-0.728162	-0.599931	2.24969	0.224285	0.119816	0.211675	0.370085	-0.120241	0.657872	-0.228768	-0.470569	-0.394031	0.763175	-0.0430156	-0.352364	-0.47572	0.260721	-0.131364	0.281544	-0.268815	-0.251983	0.126838	-3.44076	0.98663	2.18265	0.586605	-0.276667	1.1685	-0.00666367	-0.176153
-0.7564	0.183142	-0.292367	-0.353286	0.844242	-0.662425	-0.767341	0.317399	0.132771	0.0415722	0.66456	-0.0106331	0.162626	-0.504198	1.13624	-0.211259	-0.102465	-1.90552	1.95987	0.796568	-0.695417	-0.633648	2.23438	0.266168	0.106516	0.159732	0.291021	-0.160676	0.625795	-0.198265	-0.492977	-0.404772	0.760609	-0.0617248	-0.353612	-0.474349	0.258031	-0.173623	0.272183	-0.31097	-0.239261	0.118999	-3.67821	1.01672	2.23628	0.537345	-0.316241	1.12474	-0.0281502	-0.176299
-0.732	0.146951	-0.304795	-0.368085	0.857436	-0.59562	-0.753768	0.315855	0.1107	-0.045079	0.62021	-0.0235834	0.158138	-0.515401	1.15187	-0.23313	-0.139665	-2.06282	1.92338	0.75412	-0.671689	-0.659611	2.21746	0.309466	0.0978123	0.104895	0.204054	-0.20323	0.597945	-0.179905	-0.514885	-0.389365	0.758612	-0.083348	-0.357353	-0.484126	0.247137	-0.207911	0.247233	-0.347752	-0.229451	0.114264	-3.91268	1.04482	2.29531	0.501291	-0.352176	1.09244	-0.0514487	-0.184518
-0.7076	0.113521	-0.32527	-0.39064	0.874268	-0.528002	-0.732172	0.326579	0.0956424	-0.152033	0.579676	-0.0335311	0.138683	-0.526313	1.17155	-0.249362	-0.166092	-2.26467	1.87225	0.726426	-0.656498	-0.68506	2.20041	0.351287	0.09291	0.0464969	0.119876	-0.24431	0.573572	-0.172494	-0.533821	-0.346589	0.756779	-0.107178	-0.364422	-0.502636	0.224614	-0.233264	0.213784	-0.374314	-0.226702	0.111204	-4.12651	1.06863	2.35863	0.485957	-0.381649	1.0726	-0.0748098	-0.199503
-0.6832	0.0815009	-0.349106	-0.416009	0.894334	-0.4662	-0.705722	0.345883	0.0875275	-0.273646	0.551375	-0.0386308	0.105062	-0.538819	1.19645	-0.255373	-0.182034	-2.49764	1.80623	0.722792	-0.649623	-0.719022	2.18464	0.393324	0.0898302	-0.015789	0.0452911	-0.280916	0.552312	-0.173112	-0.548498	-0.281059	0.754531	-0.13183	-0.375538	-0.529165	0.188722	-0.24981	0.179586	-0.386584	-0.232397	0.108055	-4.31109	1.08688	2.42448	0.495515	-0.402872	1.06474	-0.0957218	-0.219633
-0.6588	0.049491	-0.369396	-0.438894	0.916365	-0.417807	-0.676382	0.367023	0.0844956	-0.402673	0.53842	-0.0392455	0.0593385	-0.549758	1.22717	-0.251434	-0.189466	-2.74137	1.72649	0.743989	-0.650582	-0.768845	2.17174	0.433109	0.086008	-0.0791858	-0.0141694	-0.310915	0.53488	-0.178358	-0.558686	-0.201647	0.751776	-0.15542	-0.391171	-0.563038	0.139882	-0.25846	0.151632	-0.382914	-0.245438	0.103093	-4.46369	1.09952	2.49275	0.530328	-0.415151	1.06679	-0.111019	-0.24276
-0.6344	0.0168529	-0.379929	-0.455902	0.938906	-0.388256	-0.645632	0.389072	0.0828868	-0.530191	0.538391	-0.0361968	0.0045953	-0.55365	1.2633	-0.243745	-0.191967	-2.96306	1.63702	0.780821	-0.657082	-0.835206	2.16368	0.461664	0.0793324	-0.136943	-0.0526794	-0.333443	0.523025	-0.185235	-0.564993	-0.122847	0.749226	-0.175761	-0.412081	-0.60164	0.0793455	-0.260363	0.135365	-0.364211	-0.267153	0.0950935	-4.57673	1.10755	2.56485	0.582309	-0.419015	1.07551	-0.119627	-0.266575
-0.61	-0.0158483	-0.376862	-0.465716	0.960583	-0.380328	-0.615162	0.418674	0.0777756	-0.646833	0.545649	-0.029373	-0.0552359	-0.550969	1.30342	-0.239525	-0.193926	-3.11648	1.54527	0.815821	-0.663902	-0.908499	2.16253	0.472636	0.0688259	-0.181026	-0.0663562	-0.348584	0.518949	-0.191601	-0.568586	-0.0619503	0.74816	-0.19058	-0.438433	-0.640843	0.00838788	-0.256711	0.133684	-0.332862	-0.301959	0.0838418	-4.63386	1.11253	2.6427	0.634665	-0.417048	1.08729	-0.122963	-0.289407
-0.5856	-0.047118	-0.358538	-0.468015	0.97969	-0.396505	-0.587028	0.462683	0.0641838	-0.744862	0.553976	-0.0176784	-0.115531	-0.551285	1.3457	-0.243676	-0.199236	-3.1544	1.46063	0.831791	-0.663241	-0.971652	2.16967	0.467902	0.0544117	-0.205118	-0.0550562	-0.356827	0.524596	-0.196533	-0.570515	-0.0319147	0.74988	-0.198214	-0.4676	-0.676064	-0.0706573	-0.248915	0.146464	-0.291567	-0.35124	0.0706259	-4.62033	1.11629	2.72912	0.670984	-0.414156	1.09912	-0.120576	-0.310682
-0.5612	-0.0752501	-0.324917	-0.462964	0.993655	-0.437553	-0.563291	0.520592	0.0386675	-0.819474	0.558863	-0.000992845	-0.171527	-0.567165	1.38839	-0.258913	-0.210298	-3.04756	1.391	0.820486	-0.646512	-1.00938	2.18503	0.453766	0.0362997	-0.20644	-0.0217515	-0.358844	0.540994	-0.200437	-0.570899	-0.0357343	0.754914	-0.198694	-0.493244	-0.705556	-0.153928	-0.239108	0.171321	-0.243107	-0.408781	0.0581475	-4.53446	1.12039	2.82657	0.685392	-0.416179	1.10951	-0.108684	-0.330498
-0.5368	-0.0987908	-0.277748	-0.451432	0.999184	-0.498617	-0.545201	0.584237	0.000422295	-0.868968	0.559192	0.0187018	-0.21955	-0.60619	1.4297	-0.284715	-0.22785	-2.79653	1.34061	0.782053	-0.607351	-1.01474	2.20719	0.437616	0.0148349	-0.188056	0.0286218	-0.354948	0.567749	-0.204716	-0.568738	-0.0666624	0.762252	-0.194045	-0.507309	-0.732788	-0.236818	-0.230648	0.204846	-0.190844	-0.462933	0.0497427	-4.3885	1.12554	2.93389	0.682539	-0.428004	1.11846	-0.0847439	-0.348895
-0.5124	-0.116318	-0.22103	-0.435263	0.993186	-0.568924	-0.532575	0.643713	-0.0487296	-0.894819	0.557235	0.0387204	-0.258166	-0.665201	1.46748	-0.317358	-0.251308	-2.43161	1.31025	0.720668	-0.54485	-0.988908	2.23481	0.424251	-0.00920399	-0.158961	0.0890122	-0.344726	0.602978	-0.210874	-0.562402	-0.113484	0.769377	-0.187204	-0.504555	-0.762139	-0.314038	-0.227559	0.243573	-0.138815	-0.500442	0.0485114	-4.20214	1.13118	3.04485	0.669381	-0.452089	1.12665	-0.0514974	-0.365793
-0.488	-0.126216	-0.160841	-0.417052	0.973777	-0.635715	-0.523991	0.692527	-0.105112	-0.901053	0.556773	0.0559295	-0.288166	-0.731236	1.49879	-0.352722	-0.279024	-2.00439	1.29857	0.642204	-0.464659	-0.939757	2.26811	0.413045	-0.0344085	-0.12844	0.15129	-0.327713	0.643695	-0.219516	-0.550253	-0.16509	0.773104	-0.180496	-0.486986	-0.794836	-0.380164	-0.232698	0.284748	-0.0912228	-0.510902	0.0566073	-3.99664	1.13533	3.15004	0.650584	-0.486832	1.13439	-0.0153864	-0.381496
-0.4636	-0.127291	-0.104197	-0.399219	0.940582	-0.689583	-0.517879	0.729507	-0.164074	-0.892076	0.560919	0.0655582	-0.311587	-0.78774	1.52031	-0.388887	-0.308358	-1.5725	1.30311	0.551744	-0.376929	-0.879917	2.30898	0.402671	-0.0589094	-0.0997491	0.209336	-0.303963	0.686295	-0.23008	-0.531198	-0.21079	0.770556	-0.17459	-0.462543	-0.82985	-0.432157	-0.246247	0.326713	-0.0519887	-0.491268	0.074725	-3.79271	1.13506	3.23976	0.631445	-0.52589	1.14135	0.017974	-0.39719
-0.4392	-0.119513	-0.0567777	-0.383589	0.894254	-0.727852	-0.513523	0.758181	-0.22108	-0.871086	0.571611	0.0627942	-0.330878	-0.81895	1.5292	-0.426726	-0.336054	-1.18184	1.32185	0.452302	-0.292719	-0.8229	2.35978	0.396029	-0.0807681	-0.0699379	0.258778	-0.273881	0.727025	-0.241269	-0.505	-0.239421	0.759864	-0.168087	-0.437368	-0.863167	-0.470714	-0.265938	0.368647	-0.0243551	-0.443362	0.101955	-3.60867	1.12754	3.3065	0.618988	-0.560249	1.14735	0.0456358	-0.414755
-0.4148	-0.103759	-0.0202186	-0.371824	0.835941	-0.752908	-0.510883	0.782085	-0.272967	-0.841287	0.590568	0.0468725	-0.348536	-0.815725	1.52419	-0.466635	-0.359097	-0.858118	1.35395	0.347093	-0.22086	-0.77971	2.42211	0.397311	-0.0982652	-0.0356472	0.294054	-0.238228	0.762805	-0.251569	-0.472029	-0.241036	0.740232	-0.157918	-0.410829	-0.884679	-0.498462	-0.288561	0.410056	-0.0100408	-0.369097	0.135756	-3.45664	1.1108	3.34734	0.615353	-0.581802	1.15356	0.0658304	-0.435339
-0.3904	-0.0810849	0.00860482	-0.365082	0.767203	-0.76775	-0.509754	0.800961	-0.318462	-0.807714	0.619566	0.02281	-0.366588	-0.782487	1.5062	-0.502072	-0.375526	-0.611088	1.39823	0.241065	-0.166324	-0.756606	2.49562	0.40614	-0.109915	0.00149152	0.310031	-0.198626	0.792274	-0.259579	-0.432872	-0.210734	0.711727	-0.140686	-0.377465	-0.882029	-0.518158	-0.311445	0.450652	-0.00837265	-0.271907	0.172042	-3.34034	1.08354	3.3669	0.614488	-0.585658	1.16274	0.0761511	-0.457805
-0.366	-0.0526287	0.0353141	-0.362548	0.689953	-0.774403	-0.509386	0.811666	-0.357621	-0.776001	0.659268	-0.00128801	-0.385682	-0.734244	1.47798	-0.519026	-0.384745	-0.442316	1.45214	0.138942	-0.129895	-0.754858	2.57765	0.417697	-0.114493	0.0354844	0.307229	-0.158028	0.816035	-0.264254	-0.388424	-0.151956	0.675762	-0.114402	-0.331293	-0.853569	-0.532842	-0.333148	0.490671	-0.016485	-0.158406	0.206065	-3.255	1.04467	3.3794	0.609966	-0.571042	1.17805	0.0741419	-0.479096
-0.3416	-0.0203251	0.0648889	-0.360962	0.606129	-0.776794	-0.508572	0.809005	-0.390778	-0.749525	0.70758	-0.0184962	-0.404654	-0.685117	1.44269	-0.506086	-0.387276	-0.346119	1.51287	0.0446174	-0.108499	-0.771892	2.66381	0.427453	-0.111433	0.0611287	0.293135	-0.120397	0.835731	-0.26504	-0.340284	-0.0760642	0.635578	-0.0796102	-0.271092	-0.8134	-0.545539	-0.353489	0.53119	-0.0309291	-0.0363152	0.234107	-3.18815	0.993566	3.40643	0.602232	-0.542225	1.20138	0.0604309	-0.496245
-0.3172	0.0122091	0.0996246	-0.356532	0.517472	-0.783717	-0.505997	0.789473	-0.417903	-0.728391	0.759206	-0.025324	-0.421231	-0.641995	1.40226	-0.465054	-0.384198	-0.305954	1.57785	-0.0357791	-0.0960787	-0.801103	2.74865	0.432873	-0.101257	0.0783253	0.277743	-0.0891011	0.852726	-0.261759	-0.290718	0.00237378	0.595469	-0.0392402	-0.203239	-0.778265	-0.557489	-0.373293	0.574084	-0.0492569	0.0882151	0.254906	-3.12588	0.931052	3.46859	0.596073	-0.508605	1.23267	0.0405336	-0.507576
-0.2928	0.0396908	0.138578	-0.347034	0.425586	-0.805905	-0.500509	0.758125	-0.439024	-0.709879	0.807294	-0.0212015	-0.433308	-0.606013	1.35704	-0.411155	-0.376742	-0.298046	1.64353	-0.0935473	-0.0850567	-0.830334	2.82652	0.43253	-0.0855494	0.0925696	0.268659	-0.0646666	0.86732	-0.254561	-0.241925	0.070942	0.559213	0.00258124	-0.136554	-0.755415	-0.567044	-0.39417	0.621695	-0.0700008	0.211121	0.270064	-3.06216	0.859645	3.57596	0.596039	-0.481974	1.2704	0.0225281	-0.512202
-0.2684	0.0566058	0.178201	-0.332135	0.332101	-0.847974	-0.491102	0.727542	-0.454903	-0.689097	0.846202	-0.00715367	-0.439832	-0.574451	1.30659	-0.362893	-0.366197	-0.303594	1.7051	-0.123074	-0.0679136	-0.845287	2.89251	0.42564	-0.0665416	0.111413	0.269504	-0.044014	0.878869	-0.243989	-0.195361	0.123673	0.528824	0.0418899	-0.0752735	-0.745156	-0.570056	-0.418395	0.67605	-0.091934	0.326251	0.283343	-3.00053	0.782777	3.72393	0.60438	-0.471591	1.31263	0.0131511	-0.509101
-0.244	0.0590663	0.213237	-0.312934	0.238641	-0.902128	-0.477039	0.709826	-0.466799	-0.660499	0.873665	0.0145204	-0.440908	-0.540826	1.25075	-0.3323	-0.353863	-0.315475	1.75835	-0.127033	-0.0385018	-0.840735	2.94285	0.41131	-0.0467365	0.138884	0.28063	-0.0220968	0.886562	-0.230826	-0.151815	0.161835	0.504433	0.0756985	-0.0190201	-0.745736	-0.560992	-0.448595	0.737462	-0.114024	0.422186	0.298958	-2.9468	0.703917	3.89448	0.617734	-0.48021	1.35722	0.0168065	-0.497015
-0.2196	0.0457035	0.23756	-0.291704	0.14651	-0.950581	-0.458438	0.71081	-0.475776	-0.620826	0.891048	0.0399383	-0.437271	-0.495838	1.19019	-0.323473	-0.340837	-0.329795	1.80211	-0.114872	0.00710879	-0.825823	2.97451	0.389042	-0.0287572	0.172455	0.302513	0.00581409	0.890027	-0.215736	-0.112058	0.187947	0.485423	0.102264	0.0332125	-0.752036	-0.535034	-0.487018	0.803585	-0.135533	0.487626	0.319717	-2.90383	0.626272	4.06098	0.627508	-0.504073	1.40127	0.0367297	-0.475366
-0.1952	0.0174046	0.245727	-0.271833	0.0565936	-0.97696	-0.436726	0.72784	-0.482329	-0.571712	0.901684	0.0648325	-0.429751	-0.432506	1.12672	-0.333681	-0.327628	-0.334806	1.83816	-0.0964837	0.0704826	-0.815099	2.98499	0.361723	-0.0152465	0.204771	0.339149	0.0427167	0.889397	-0.199164	-0.0773975	0.200424	0.471933	0.121087	0.0818113	-0.754094	-0.490837	-0.53468	0.870123	-0.155455	0.519497	0.345937	-2.87434	0.552652	4.19566	0.627569	-0.536758	1.4408	0.0734499	-0.445328
-0.1708	-0.0233258	0.235135	-0.257175	-0.0301903	-0.976535	-0.414206	0.751301	-0.486438	-0.518691	0.908886	0.0869887	-0.419236	-0.353079	1.06343	-0.354885	-0.314009	-0.31507	1.86858	-0.0770971	0.150896	-0.818611	2.97289	0.335041	-0.00843691	0.228229	0.394541	0.0893803	0.88515	-0.181779	-0.0496998	0.197176	0.465488	0.132658	0.128066	-0.740702	-0.431898	-0.590838	0.932425	-0.171787	0.524185	0.375537	-2.86221	0.485199	4.27757	0.619853	-0.573165	1.47179	0.122042	-0.410054
-0.1464	-0.0728967	0.207184	-0.249932	-0.112279	-0.956829	-0.392932	0.769798	-0.488189	-0.467624	0.914891	0.106038	-0.406863	-0.26911	1.00383	-0.380131	-0.299421	-0.263901	1.89388	-0.0555046	0.245094	-0.83971	2.9389	0.312726	-0.00949681	0.239846	0.465858	0.144664	0.877965	-0.164855	-0.0309522	0.183165	0.468402	0.138074	0.175006	-0.707153	-0.365546	-0.653212	0.986773	-0.18172	0.511865	0.405285	-2.86722	0.42533	4.298	0.612998	-0.610895	1.49169	0.173326	-0.373747
-0.122	-0.127211	0.166781	-0.248897	-0.187077	-0.930247	-0.374063	0.775233	-0.488657	-0.423209	0.920122	0.120807	-0.394042	-0.194497	0.9503	-0.408414	-0.28365	-0.187083	1.91227	-0.0251694	0.347674	-0.874861	2.88613	0.295742	-0.0182938	0.242578	0.542658	0.205598	0.868479	-0.150121	-0.0223054	0.170709	0.482697	0.138726	0.226495	-0.65995	-0.301084	-0.719047	1.03101	-0.182936	0.491481	0.432124	-2.88086	0.373831	4.26183	0.615789	-0.65003	1.49992	0.217564	-0.339956
-0.0976	-0.182445	0.120965	-0.249728	-0.250946	-0.905143	-0.358219	0.765169	-0.490197	-0.389618	0.922555	0.128054	-0.382107	-0.138693	0.902664	-0.440638	-0.267298	-0.0983842	1.91961	0.0200588	0.452705	-0.91452	2.81936	0.283779	-0.0336744	0.242392	0.611748	0.266685	0.857079	-0.139515	-0.0228612	0.169492	0.50921	0.136058	0.284944	-0.612082	-0.248054	-0.786135	1.06415	-0.174509	0.47235	0.453677	-2.89006	0.330581	4.18547	0.629043	-0.692313	1.49727	0.246981	-0.310553
-0.0732	-0.235738	0.0770091	-0.246396	-0.29971	-0.881911	-0.345687	0.743098	-0.495842	-0.369478	0.918784	0.122717	-0.371879	-0.105187	0.858906	-0.474204	-0.251806	-0.0139501	1.9117	0.0786402	0.555096	-0.949419	2.74401	0.273366	-0.0536796	0.245737	0.662038	0.320632	0.843805	-0.135001	-0.0293718	0.178431	0.547301	0.131114	0.348708	-0.574441	-0.213444	-0.852772	1.08533	-0.156678	0.466037	0.468466	-2.88629	0.294164	4.09235	0.645214	-0.739269	1.48495	0.257409	-0.286167
-0.0488	-0.285221	0.0400523	-0.233895	-0.329563	-0.855621	-0.335932	0.71757	-0.508167	-0.36165	0.907176	0.0989789	-0.36368	-0.0948052	0.817288	-0.506214	-0.238866	0.0521124	1.8878	0.140465	0.650747	-0.977241	2.66552	0.258817	-0.0755612	0.258046	0.687485	0.361651	0.828389	-0.138403	-0.0374341	0.189792	0.595198	0.12412	0.411567	-0.552439	-0.199284	-0.917031	1.09323	-0.130379	0.480413	0.476072	-2.8701	0.262035	4.00759	0.655149	-0.790281	1.46398	0.249936	-0.267156
-0.0244	-0.329393	0.0111324	-0.210832	-0.338158	-0.820479	-0.32752	0.698624	-0.528405	-0.36151	0.890161	0.0523531	-0.357592	-0.107077	0.777726	-0.537528	-0.229546	0.0904305	1.85164	0.192202	0.736551	-1.00027	2.58889	0.239224	-0.0960951	0.280182	0.687776	0.388142	0.810546	-0.15138	-0.0433698	0.197673	0.650276	0.11473	0.465393	-0.546787	-0.203502	-0.976483	1.08607	-0.0967774	0.512145	0.476981	-2.84716	0.231253	3.95357	0.652384	-0.842284	1.43517	0.230735	-0.254096
0	-0.366555	-0.013025	-0.179308	-0.325635	-0.773654	-0.318865	0.692821	-0.55637	-0.36325	0.872641	-0.0185347	-0.353398	-0.137974	0.741477	-0.567812	-0.223758	0.0987857	1.8096	0.223071	0.810902	-1.01761	2.51862	0.220002	-0.112291	0.305393	0.666695	0.401558	0.790367	-0.175154	-0.0455108	0.200588	0.709041	0.102972	0.504152	-0.553908	-0.22234	-1.0287	1.06204	-0.0567629	0.546358	0.472396	-2.82091	0.199333	3.9465	0.633629	-0.890756	1.3994	0.207815	-0.247299
0.0244	-0.394922	-0.0375861	-0.143505	-0.295066	-0.719993	-0.308707	0.701418	-0.590902	-0.361169	0.858361	-0.111171	-0.350284	-0.180559	0.710364	-0.592071	-0.220336	0.0829761	1.76947	0.22807	0.873603	-1.02245	2.45888	0.204937	-0.122029	0.322053	0.631018	0.403293	0.76849	-0.20976	-0.0442196	0.199429	0.767672	0.089792	0.527077	-0.566993	-0.251174	-1.07183	1.02033	-0.0112925	0.563416	0.464053	-2.79041	0.165152	3.99387	0.597848	-0.931208	1.35748	0.187393	-0.245832
0.0488	-0.413233	-0.0652872	-0.10925	-0.251896	-0.672782	-0.296037	0.721394	-0.630018	-0.349853	0.848441	-0.21913	-0.346782	-0.229335	0.686462	-0.606662	-0.217494	0.052945	1.74049	0.207131	0.924349	-1.00763	2.41322	0.192053	-0.124293	0.320194	0.591047	0.393859	0.74599	-0.253562	-0.0409636	0.194833	0.823114	0.0763246	0.539976	-0.579315	-0.283987	-1.10473	0.961969	0.0379805	0.547671	0.453639	-2.75289	0.129707	4.09367	0.547341	-0.960835	1.30964	0.173108	-0.247331
0.0732	-0.421369	-0.0937714	-0.0836907	-0.202748	-0.646143	-0.280237	0.747784	-0.6706	-0.324908	0.842209	-0.333585	-0.341252	-0.2796	0.671552	-0.614218	-0.213349	0.0179844	1.73036	0.164208	0.961956	-0.973897	2.38407	0.179167	-0.119073	0.295945	0.55781	0.374432	0.724102	-0.303447	-0.0372738	0.185766	0.873436	0.0626717	0.55332	-0.587928	-0.313814	-1.1266	0.889942	0.0892394	0.493044	0.442016	-2.70427	0.0958859	4.23466	0.492558	-0.979469	1.25529	0.167772	-0.248716
0.0976	-0.420495	-0.117387	-0.0735544	-0.154294	-0.646566	-0.2612	0.77707	-0.708406	-0.284793	0.838351	-0.44614	-0.332501	-0.32268	0.66593	-0.620839	-0.206377	-0.014301	1.74001	0.108095	0.985857	-0.929928	2.37212	0.16843	-0.107175	0.252761	0.536788	0.347986	0.703886	-0.355573	-0.0341827	0.170577	0.917341	0.0475263	0.577276	-0.5933	-0.33433	-1.13676	0.808887	0.14143	0.403662	0.428777	-2.64207	0.0670921	4.39769	0.452052	-0.988331	1.19343	0.17443	-0.247219
0.122	-0.412519	-0.131065	-0.0821217	-0.112195	-0.669904	-0.238884	0.809042	-0.739233	-0.231985	0.836019	-0.55069	-0.319993	-0.348298	0.667796	-0.63077	-0.195852	-0.0383357	1.76316	0.0482006	0.99757	-0.884926	2.37586	0.1631	-0.0901435	0.199032	0.526248	0.319114	0.686042	-0.406272	-0.0321999	0.149798	0.954076	0.0289576	0.616872	-0.593689	-0.341173	-1.13473	0.724285	0.19417	0.291221	0.412395	-2.57251	0.0459375	4.55972	0.441747	-0.987421	1.12342	0.194776	-0.241513
0.1464	-0.399179	-0.132668	-0.106831	-0.080139	-0.704192	-0.213168	0.845886	-0.760899	-0.17198	0.835772	-0.643119	-0.303818	-0.352083	0.674045	-0.642508	-0.182115	-0.0527423	1.79065	-0.0113262	1.00054	-0.845617	2.39218	0.16385	-0.0703124	0.142366	0.521292	0.292858	0.671123	-0.452485	-0.0313476	0.127299	0.983958	0.00575021	0.670174	-0.581708	-0.332771	-1.12062	0.641384	0.246969	0.172518	0.390816	-2.50984	0.0340167	4.7003	0.463616	-0.97479	1.04556	0.22654	-0.232287
0.1708	-0.381444	-0.123423	-0.140839	-0.0596158	-0.737562	-0.184196	0.888959	-0.774383	-0.111744	0.839453	-0.720319	-0.284556	-0.33927	0.681584	-0.648695	-0.166417	-0.0606487	1.81333	-0.0695624	0.999279	-0.816666	2.41793	0.170209	-0.0507839	0.0861348	0.518349	0.272969	0.659907	-0.491873	-0.0307156	0.10623	1.00829	-0.0215506	0.729882	-0.549182	-0.310016	-1.09538	0.564493	0.298621	0.0669674	0.362085	-2.46478	0.0325605	4.80772	0.505669	-0.947926	0.961047	0.262693	-0.221642
0.1952	-0.359449	-0.10716	-0.178045	-0.0504444	-0.764767	-0.152243	0.934834	-0.782722	-0.0579912	0.848582	-0.780728	-0.262976	-0.321566	0.688321	-0.64133	-0.150427	-0.0670195	1.82294	-0.123452	0.998659	-0.797885	2.45059	0.18149	-0.0349734	0.0307441	0.517821	0.260468	0.653379	-0.522984	-0.0280054	0.0840667	1.02834	-0.0505561	0.785971	-0.495984	-0.274884	-1.06089	0.497042	0.347362	-0.00909394	0.324917	-2.43575	0.0428492	4.88045	0.550518	-0.905385	0.871444	0.293886	-0.211955
0.2196	-0.332808	-0.0883481	-0.215115	-0.0513377	-0.786792	-0.117323	0.97441	-0.788416	-0.0145024	0.862631	-0.826553	-0.239946	-0.309335	0.693939	-0.616926	-0.135609	-0.0771302	1.8136	-0.166969	1.0032	-0.782051	2.48785	0.193719	-0.0255493	-0.0233398	0.523094	0.253386	0.652255	-0.545267	-0.020095	0.055287	1.04466	-0.0779744	0.827046	-0.433706	-0.229613	-1.01951	0.442034	0.391947	-0.0481982	0.279456	-2.41321	0.0655814	4.92354	0.584215	-0.847761	0.778269	0.312521	-0.205141
0.244	-0.301102	-0.0686659	-0.248666	-0.0602605	-0.805454	-0.0797021	0.996241	-0.791967	0.0189154	0.87898	-0.864463	-0.216717	-0.308049	0.70027	-0.577691	-0.122632	-0.0966064	1.78319	-0.194342	1.01656	-0.758312	2.52735	0.198827	-0.0233694	-0.0733857	0.536532	0.248205	0.656426	-0.558885	-0.00444112	0.0187614	1.05704	-0.100786	0.842176	-0.379946	-0.17698	-0.973481	0.402076	0.432644	-0.0516783	0.227715	-2.38924	0.0998267	4.94462	0.602077	-0.776989	0.683141	0.314906	-0.202487
0.2684	-0.264274	-0.043847	-0.274148	-0.0747738	-0.819584	-0.0409532	0.992046	-0.792685	0.0446214	0.894012	-0.902184	-0.195149	-0.319684	0.710657	-0.531604	-0.111286	-0.129708	1.73396	-0.203631	1.04119	-0.718602	2.56751	0.189956	-0.027452	-0.115971	0.555337	0.242054	0.664646	-0.564635	0.0199081	-0.0217848	1.0648	-0.116676	0.82592	-0.348749	-0.121271	-0.924589	0.378723	0.470938	-0.0254702	0.173104	-2.36038	0.142857	4.95181	0.607959	-0.695395	0.588153	0.301248	-0.204998
0.2928	-0.222401	-0.00507272	-0.289193	-0.0924602	-0.827424	-0.00415569	0.961026	-0.790172	0.0656082	0.904425	-0.943227	-0.177434	-0.343101	0.72842	-0.491743	-0.101022	-0.176266	1.6726	-0.198197	1.07726	-0.660615	2.60862	0.167564	-0.0361789	-0.151298	0.570328	0.233902	0.674579	-0.563981	0.0522451	-0.0639244	1.06726	-0.123689	0.782841	-0.345234	-0.0685307	-0.874445	0.371869	0.508288	0.0215485	0.119606	-2.32626	0.191215	4.95334	0.608643	-0.606978	0.495859	0.275277	-0.213522
0.3172	-0.17513	0.0552226	-0.295686	-0.111349	-0.8296	0.0268585	0.909101	-0.784882	0.0857157	0.908773	-0.984435	-0.16534	-0.376319	0.755056	-0.471631	-0.0916135	-0.230309	1.60866	-0.186014	1.12135	-0.585388	2.65273	0.139303	-0.0485755	-0.183759	0.571103	0.224365	0.683204	-0.558959	0.0907446	-0.107735	1.06447	-0.119814	0.725382	-0.365562	-0.0249969	-0.824961	0.379686	0.545329	0.0776409	0.0710833	-2.2894	0.241854	4.95724	0.609322	-0.518494	0.408479	0.242217	-0.227733
0.3416	-0.121656	0.139018	-0.297654	-0.130149	-0.827673	0.0486769	0.844806	-0.777671	0.109558	0.908124	-1.0184	-0.159698	-0.418906	0.789272	-0.47723	-0.0834777	-0.282386	1.55076	-0.175952	1.16689	-0.495262	2.70204	0.112212	-0.0645125	-0.217326	0.552653	0.215014	0.687394	-0.551906	0.133139	-0.152464	1.05741	-0.103132	0.666494	-0.399565	0.0052533	-0.778509	0.398874	0.582002	0.131402	0.0305748	-2.25574	0.292143	4.96998	0.611748	-0.437415	0.326991	0.206379	-0.245254
0.366	-0.0612404	0.24242	-0.299266	-0.148069	-0.822313	0.0596379	0.777798	-0.769022	0.141018	0.904968	-1.0384	-0.160685	-0.468952	0.828024	-0.503874	-0.0774473	-0.324978	1.50311	-0.173117	1.20678	-0.394325	2.75744	0.0873361	-0.0839958	-0.251712	0.516086	0.2077	0.684532	-0.545189	0.177133	-0.1964	1.04721	-0.0724633	0.614141	-0.435974	0.0214754	-0.737551	0.424891	0.618049	0.174646	-0.000144294	-2.23398	0.339146	4.99529	0.615645	-0.369356	0.251002	0.171907	-0.262519
0.3904	0.00624304	0.357344	-0.304502	-0.164397	-0.813839	0.0602723	0.71837	-0.758598	0.182089	0.901561	-1.04181	-0.16839	-0.520239	0.868937	-0.543651	-0.0738991	-0.35689	1.465	-0.178082	1.23643	-0.287123	2.81789	0.06543	-0.106411	-0.282737	0.466034	0.203847	0.673219	-0.540743	0.22048	-0.23767	1.03454	-0.0278098	0.57121	-0.469344	0.0252304	-0.704093	0.452152	0.653481	0.203117	-0.0206129	-2.23245	0.379356	5.03422	0.619567	-0.317602	0.179502	0.143833	-0.276552
0.4148	0.0799026	0.473964	-0.315815	-0.178408	-0.803719	0.0524994	0.67446	-0.745331	0.233298	0.899176	-1.03008	-0.182966	-0.565924	0.911647	-0.593908	-0.0720119	-0.38246	1.43324	-0.188501	1.25527	-0.176615	2.88058	0.052321	-0.1303	-0.304771	0.408555	0.203954	0.653858	-0.539441	0.260919	-0.273904	1.01998	0.0298654	0.537154	-0.502681	0.0187506	-0.679258	0.474591	0.688869	0.216665	-0.0318879	-2.25508	0.409624	5.08467	0.619919	-0.283278	0.111824	0.126448	-0.286195
0.4392	0.157922	0.583009	-0.332581	-0.189507	-0.795663	0.0386733	0.649133	-0.728134	0.293985	0.898327	-1.00767	-0.204341	-0.605391	0.956766	-0.654381	-0.0701213	-0.405842	1.40539	-0.200821	1.26561	-0.0644329	2.94206	0.0535885	-0.153787	-0.313405	0.349417	0.207249	0.628654	-0.540952	0.296266	-0.304474	1.00477	0.0990915	0.508705	-0.542069	0.00521888	-0.663154	0.486486	0.724885	0.217163	-0.0366442	-2.29727	0.428779	5.14081	0.612821	-0.265377	0.0480543	0.121673	-0.29231
0.4636	0.238422	0.677104	-0.35179	-0.197191	-0.795938	0.0211217	0.639966	-0.70702	0.361056	0.899375	-0.981706	-0.231893	-0.644991	1.00413	-0.718441	-0.0667662	-0.426812	1.37984	-0.211917	1.26929	0.0462403	2.99988	0.0663305	-0.175292	-0.307701	0.2924	0.211335	0.600931	-0.544148	0.324695	-0.332567	0.990794	0.178127	0.481697	-0.589928	-0.0100423	-0.654987	0.48311	0.761303	0.205502	-0.0383361	-2.34275	0.437959	5.1941	0.597673	-0.261366	-0.0114333	0.129406	-0.296783
0.488	0.320145	0.752095	-0.370078	-0.200955	-0.811353	0.00235684	0.640682	-0.683641	0.428648	0.902696	-0.959738	-0.264277	-0.690271	1.05253	-0.773881	-0.0613317	-0.442537	1.35299	-0.218919	1.2652	0.146115	3.05313	0.0798963	-0.193851	-0.291121	0.238839	0.21231	0.573959	-0.547421	0.344996	-0.361674	0.979607	0.264927	0.454074	-0.643949	-0.0206136	-0.653112	0.461502	0.797051	0.180166	-0.0401905	-2.36614	0.43955	5.2349	0.580066	-0.267588	-0.0668634	0.14881	-0.30092
0.5124	0.401945	0.808457	-0.38504	-0.200537	-0.845123	-0.0139666	0.644603	-0.660583	0.491283	0.907668	-0.945634	-0.299339	-0.740098	1.10052	-0.812299	-0.0540507	-0.449405	1.31795	-0.218805	1.24992	0.220429	3.10172	0.086954	-0.208806	-0.270685	0.189663	0.205826	0.549888	-0.548894	0.356737	-0.390416	0.971758	0.356972	0.428108	-0.69876	-0.0216106	-0.655061	0.421603	0.831394	0.138472	-0.0449992	-2.34385	0.436535	5.25408	0.570965	-0.278672	-0.119476	0.17844	-0.304982
0.5368	0.481706	0.850655	-0.394945	-0.196322	-0.896713	-0.022462	0.646339	-0.640187	0.546951	0.912371	-0.938115	-0.334198	-0.787609	1.147	-0.833415	-0.0456713	-0.441819	1.26718	-0.208972	1.22055	0.257779	3.14601	0.0915224	-0.219295	-0.254425	0.146631	0.189079	0.529458	-0.546853	0.360422	-0.412425	0.966752	0.451176	0.409523	-0.74757	-0.00983812	-0.657972	0.366929	0.864401	0.0808431	-0.0551696	-2.26631	0.432311	5.24554	0.579727	-0.287132	-0.170807	0.215255	-0.309261
0.5612	0.556081	0.883666	-0.39834	-0.189539	-0.965799	-0.0171923	0.642007	-0.623867	0.595439	0.915839	-0.933115	-0.365818	-0.822818	1.19164	-0.840133	-0.0369792	-0.413624	1.1966	-0.186661	1.17661	0.258677	3.18672	0.105187	-0.224153	-0.248863	0.109568	0.162886	0.512584	-0.540378	0.357602	-0.420875	0.963418	0.544063	0.403786	-0.785253	0.0183523	-0.65942	0.303801	0.896269	0.0134805	-0.0727505	-2.13882	0.430207	5.20763	0.608621	-0.284442	-0.221264	0.254687	-0.314672
0.5856	0.621331	0.909574	-0.395635	-0.18205	-1.05118	0.00607257	0.62962	-0.611892	0.634856	0.920074	-0.926717	-0.39167	-0.836896	1.23511	-0.832891	-0.0285624	-0.361443	1.10823	-0.149741	1.12012	0.236082	3.22497	0.136486	-0.222309	-0.257081	0.0743232	0.132364	0.499091	-0.529789	0.350674	-0.413042	0.96036	0.632361	0.413606	-0.809521	0.0665903	-0.65822	0.23948	0.926942	-0.0547489	-0.0994705	-1.97352	0.43295	5.14188	0.654849	-0.263073	-0.269249	0.291884	-0.321667
0.61	0.674536	0.927325	-0.390445	-0.175741	-1.1451	0.0484577	0.608168	-0.603328	0.66116	0.928866	-0.916867	-0.410107	-0.826436	1.27875	-0.812068	-0.0210878	-0.285862	1.0099	-0.0999624	1.05466	0.207595	3.26231	0.181448	-0.213263	-0.276974	0.0374684	0.104767	0.488797	-0.516472	0.342201	-0.392175	0.955961	0.713767	0.437851	-0.819262	0.135425	-0.654646	0.180436	0.956522	-0.118885	-0.13636	-1.78472	0.442248	5.05042	0.712788	-0.218116	-0.311599	0.322551	-0.329289
0.6344	0.714362	0.934988	-0.388078	-0.171658	-1.23401	0.108037	0.576283	-0.596406	0.670463	0.945193	-0.903971	-0.420633	-0.791794	1.32391	-0.784335	-0.015494	-0.191628	0.912538	-0.0428278	0.984427	0.185752	3.30059	0.226217	-0.197428	-0.302706	0.00165883	0.0852201	0.481151	-0.502147	0.334001	-0.365489	0.947987	0.787139	0.470342	-0.813259	0.221134	-0.649936	0.131099	0.985356	-0.182127	-0.183104	-1.58833	0.458647	4.93484	0.772455	-0.148312	-0.344985	0.343002	-0.3359
0.6588	0.740953	0.932023	-0.392645	-0.169486	-1.30665	0.180776	0.532368	-0.589463	0.661657	0.969708	-0.890248	-0.423951	-0.734277	1.37185	-0.76067	-0.0126028	-0.0869989	0.826603	0.0153836	0.91337	0.174679	3.34175	0.259831	-0.176356	-0.328987	-0.0275733	0.0744361	0.475408	-0.488007	0.326392	-0.338892	0.933619	0.851974	0.501167	-0.789833	0.316468	-0.645739	0.0931035	1.01324	-0.249465	-0.237743	-1.40371	0.482158	4.79748	0.821778	-0.0563603	-0.36735	0.350127	-0.340697
0.6832	0.755213	0.920466	-0.404139	-0.167906	-1.35742	0.261988	0.476561	-0.581999	0.636683	1.00072	-0.87791	-0.421536	-0.658245	1.42368	-0.746728	-0.0128088	0.0174629	0.758829	0.0678242	0.844176	0.174555	3.38724	0.278954	-0.152713	-0.353566	-0.0468254	0.0708759	0.471379	-0.474237	0.318078	-0.313224	0.910278	0.907802	0.521824	-0.748666	0.411018	-0.643783	0.0655408	1.03865	-0.313526	-0.296998	-1.25613	0.512944	4.64192	0.8526	0.0517601	-0.378493	0.341998	-0.344528
0.7076	0.758199	0.905063	-0.417919	-0.165455	-1.38345	0.347623	0.413624	-0.574863	0.598584	1.03528	-0.867974	-0.415247	-0.57315	1.48014	-0.741243	-0.0164454	0.109642	0.710822	0.107139	0.776721	0.184808	3.43751	0.283535	-0.129842	-0.377182	-0.0528032	0.0744842	0.469622	-0.460118	0.306914	-0.284402	0.876591	0.953866	0.529031	-0.692399	0.492777	-0.645262	0.0462016	1.05878	-0.355931	-0.357019	-1.17216	0.551015	4.47187	0.862351	0.167737	-0.379713	0.31932	-0.349177
0.732	0.750981	0.892363	-0.428469	-0.161185	-1.38568	0.43464	0.353504	-0.569103	0.551114	1.07033	-0.861678	-0.407233	-0.489573	1.54142	-0.743765	-0.0242054	0.178443	0.680607	0.128692	0.70781	0.199786	3.49168	0.27612	-0.111081	-0.402077	-0.0407524	0.0879091	0.470609	-0.444533	0.291217	-0.24601	0.832703	0.989192	0.522195	-0.623249	0.553146	-0.650186	0.0328905	1.0703	-0.366889	-0.414248	-1.16996	0.595371	4.29111	0.851695	0.281928	-0.373214	0.286106	-0.355297
0.7564	0.734845	0.888428	-0.433274	-0.154894	-1.37337	0.521047	0.308044	-0.564772	0.499888	1.10332	-0.8618	-0.399698	-0.414137	1.60752	-0.75648	-0.0368481	0.217282	0.665006	0.134131	0.632939	0.207536	3.54779	0.260894	-0.0993305	-0.429308	-0.00990404	0.11454	0.473985	-0.426518	0.270884	-0.193787	0.779657	1.01318	0.500558	-0.541008	0.59147	-0.657454	0.0242032	1.07048	-0.35363	-0.465848	-1.25143	0.643868	4.10508	0.824078	0.385127	-0.361594	0.248143	-0.361182
0.7808	0.711701	0.896168	-0.43354	-0.14724	-1.36147	0.606261	0.285159	-0.561055	0.451246	1.13238	-0.870907	-0.394475	-0.35128	1.6779	-0.780374	-0.0543819	0.224473	0.660536	0.131939	0.548318	0.198956	3.60326	0.236811	-0.0968384	-0.457521	0.0331624	0.155581	0.478911	-0.405521	0.247686	-0.127877	0.718631	1.02609	0.465931	-0.449117	0.613974	-0.665394	0.0196524	1.05804	-0.328964	-0.509456	-1.39892	0.693928	3.92106	0.787099	0.47072	-0.347308	0.210943	-0.364287
0.8052	0.684298	0.914726	-0.432592	-0.139866	-1.36191	0.69096	0.285381	-0.556992	0.409643	1.15634	-0.889458	-0.392642	-0.305629	1.75067	-0.814495	-0.0754279	0.201139	0.663369	0.132509	0.452024	0.174852	3.65507	0.196958	-0.104866	-0.485043	0.0795272	0.208303	0.484887	-0.38162	0.224567	-0.0508639	0.65089	1.02862	0.425126	-0.358856	0.629162	-0.671967	0.0191112	1.03349	-0.299633	-0.543135	-1.58093	0.743243	3.74607	0.750775	0.535967	-0.332121	0.178516	-0.363998
0.8296	0.655748	0.941178	-0.432666	-0.134966	-1.37896	0.775913	0.306036	-0.551741	0.376829	1.17394	-0.916057	-0.39438	-0.28007	1.82289	-0.856467	-0.0973944	0.149336	0.668731	0.141298	0.344257	0.142768	3.70012	0.13871	-0.123294	-0.512057	0.123252	0.266689	0.491965	-0.355913	0.204418	0.0337267	0.578025	1.02094	0.388546	-0.282804	0.644235	-0.674814	0.0219542	0.998995	-0.265732	-0.56599	-1.76398	0.790079	3.58513	0.721592	0.581292	-0.31672	0.152452	-0.362405
0.854	0.6285	0.972621	-0.432862	-0.134263	-1.40954	0.860776	0.346038	-0.544518	0.351982	1.18284	-0.947877	-0.399091	-0.276461	1.892	-0.901735	-0.117595	0.0711614	0.670993	0.158087	0.226252	0.110136	3.73616	0.0712442	-0.150571	-0.540285	0.160617	0.324256	0.500295	-0.330522	0.189261	0.121699	0.501816	1.00256	0.366433	-0.226574	0.663592	-0.671639	0.0266529	0.957567	-0.225618	-0.578484	-1.91921	0.833572	3.44075	0.695918	0.608347	-0.300769	0.132085	-0.362294
0.8784	0.603569	1.0074	-0.430067	-0.138161	-1.44444	0.943977	0.402153	-0.534686	0.331242	1.18015	-0.980513	-0.40552	-0.29683	1.95631	-0.939986	-0.134524	-0.0317123	0.667036	0.181105	0.0992377	0.079464	3.7627	0.0116918	-0.184044	-0.571083	0.186996	0.376486	0.50974	-0.30801	0.18	0.20803	0.424072	0.973129	0.363843	-0.189112	0.688691	-0.660787	0.030972	0.912013	-0.179919	-0.582115	-2.0217	0.874126	3.31237	0.660162	0.619937	-0.283392	0.116269	-0.364883
0.9028	0.58074	1.04492	-0.420082	-0.145426	-1.47209	1.02334	0.463494	-0.522031	0.30872	1.16417	-1.00839	-0.411834	-0.339186	2.01433	-0.954527	-0.148365	-0.15769	0.659997	0.208975	-0.0344255	0.0494164	3.78106	-0.0254075	-0.22037	-0.604069	0.197782	0.421026	0.520073	-0.290625	0.176255	0.285757	0.346828	0.933521	0.378529	-0.165769	0.718268	-0.641652	0.03206	0.864413	-0.134747	-0.578732	-2.0468	0.913368	3.1968	0.602069	0.621863	-0.263659	0.105158	-0.369097
0.9272	0.559755	1.08438	-0.398097	-0.153364	-1.48491	1.0963	0.515738	-0.506726	0.280117	1.13498	-1.02606	-0.415809	-0.395476	2.06443	-0.933953	-0.160538	-0.303842	0.65756	0.240564	-0.16973	0.0200058	3.79355	-0.0342471	-0.255849	-0.637851	0.192531	0.456797	0.531419	-0.279718	0.176329	0.346744	0.27249	0.886194	0.402834	-0.148114	0.748398	-0.614561	0.0264845	0.816407	-0.102835	-0.56932	-1.97403	0.95326	3.09015	0.52258	0.622803	-0.241126	0.0997975	-0.37215
0.9516	0.541808	1.12392	-0.360496	-0.158648	-1.48364	1.15949	0.550388	-0.488565	0.245407	1.09312	-1.02934	-0.415163	-0.457912	2.10505	-0.883584	-0.172689	-0.466903	0.665413	0.274519	-0.300019	-0.00571121	3.80212	-0.0147839	-0.286916	-0.670402	0.175534	0.483615	0.544351	-0.275481	0.177523	0.384623	0.203703	0.834443	0.427835	-0.126862	0.773539	-0.580189	0.0111901	0.769542	-0.098452	-0.553191	-1.80216	0.994861	2.98884	0.435139	0.631121	-0.216379	0.0993586	-0.37119
0.976	0.530099	1.16087	-0.307349	-0.158395	-1.47485	1.20886	0.567199	-0.466214	0.207929	1.03885	-1.01497	-0.407939	-0.522476	2.13501	-0.819516	-0.185753	-0.646964	0.682946	0.307026	-0.419387	-0.024535	3.80775	0.0301356	-0.310743	-0.697984	0.153204	0.502484	0.559577	-0.277093	0.176715	0.397144	0.143179	0.781319	0.448448	-0.0975764	0.788666	-0.539113	-0.0149399	0.72521	-0.127524	-0.528726	-1.55762	1.0378	2.88987	0.357149	0.651455	-0.191019	0.0999037	-0.36511
1.0004	0.52887	1.19314	-0.242489	-0.150705	-1.46329	1.24053	0.57118	-0.437551	0.171486	0.973573	-0.980324	-0.392884	-0.582877	2.15382	-0.755507	-0.199779	-0.849101	0.705617	0.330262	-0.524184	-0.0366309	3.81123	0.0907007	-0.32554	-0.716643	0.132328	0.515873	0.577496	-0.282999	0.17094	0.387631	0.0935885	0.729218	0.464296	-0.0630302	0.790341	-0.491669	-0.0505296	0.684568	-0.182464	-0.494876	-1.28255	1.08042	2.79144	0.304193	0.683026	-0.166913	0.0971297	-0.35483
1.0248	0.541637	1.22046	-0.171451	-0.134988	-1.44948	1.252	0.569036	-0.400971	0.138747	0.902015	-0.925257	-0.369805	-0.628177	2.16199	-0.698571	-0.214466	-1.08174	0.729695	0.335135	-0.613573	-0.0440234	3.8138	0.148311	-0.330366	-0.725444	0.118683	0.526851	0.597995	-0.291021	0.157733	0.365449	0.0572121	0.680005	0.476297	-0.0323861	0.776892	-0.437736	-0.0927302	0.648618	-0.247916	-0.452233	-1.01416	1.11999	2.69348	0.285605	0.719917	-0.145135	0.0899304	-0.341923
1.0492	0.569644	1.24427	-0.100113	-0.112603	-1.43446	1.24305	0.566106	-0.356689	0.11208	0.832434	-0.853129	-0.339807	-0.650299	2.16123	-0.650613	-0.229619	-1.35271	0.753526	0.315411	-0.689493	-0.0467009	3.81683	0.182191	-0.324732	-0.725972	0.115773	0.53652	0.620658	-0.298595	0.135305	0.343469	0.0352671	0.634988	0.486035	-0.0167395	0.749427	-0.376866	-0.138382	0.618116	-0.310378	-0.403126	-0.776199	1.15303	2.59653	0.300206	0.753537	-0.125297	0.0812349	-0.327212
1.0736	0.611329	1.26582	-0.0340243	-0.0869621	-1.42035	1.21594	0.565661	-0.307333	0.0937442	0.774933	-0.76943	-0.305151	-0.651102	2.15464	-0.609935	-0.244857	-1.66042	0.776544	0.268773	-0.755519	-0.0455765	3.821	0.179616	-0.308482	-0.720578	0.125094	0.542163	0.645024	-0.30356	0.102899	0.330768	0.0272982	0.594769	0.496273	-0.0234587	0.71237	-0.309083	-0.183875	0.593433	-0.361887	-0.350631	-0.58652	1.17638	2.50067	0.338252	0.775772	-0.105963	0.0747904	-0.310627
1.098	0.663231	1.28465	0.0221773	-0.0624826	-1.40626	1.17457	0.568788	-0.257487	0.0839163	0.738711	-0.679944	-0.268928	-0.641423	2.14675	-0.573665	-0.258886	-1.97983	0.799543	0.195701	-0.814989	-0.0463875	3.82575	0.14356	-0.282073	-0.713165	0.147572	0.53894	0.670637	-0.304947	0.0611688	0.325696	0.0308023	0.559205	0.507617	-0.0545072	0.672081	-0.235698	-0.224419	0.574715	-0.398704	-0.297377	-0.463817	1.18855	2.40572	0.388029	0.780643	-0.0859043	0.0713325	-0.291836
1.1224	0.721726	1.29902	0.064773	-0.0431898	-1.38909	1.12335	0.575055	-0.212256	0.0797256	0.729576	-0.590734	-0.234896	-0.633164	2.14263	-0.542569	-0.269277	-2.25762	0.824456	0.0997085	-0.869719	-0.056652	3.82992	0.0910125	-0.246839	-0.707628	0.184974	0.523132	0.697227	-0.30294	0.0122365	0.31819	0.0412294	0.527575	0.516261	-0.106157	0.635474	-0.1596	-0.254582	0.562017	-0.421327	-0.245205	-0.42106	1.18996	2.31121	0.439547	0.76474	-0.0650629	0.0695716	-0.270491
1.1468	0.784208	1.30794	0.0919452	-0.0318339	-1.36762	1.06649	0.584973	-0.175829	0.0774332	0.749483	-0.509245	-0.207322	-0.630548	2.14647	-0.523485	-0.273253	-2.4336	0.851677	-0.0122321	-0.919813	-0.0810988	3.83286	0.0425038	-0.205099	-0.704759	0.241581	0.493525	0.724941	-0.298197	-0.0405727	0.297916	0.0530505	0.498943	0.517538	-0.16876	0.608763	-0.0848293	-0.270338	0.554999	-0.433701	-0.195548	-0.454762	1.18192	2.21582	0.482742	0.727529	-0.0445357	0.0698969	-0.246117
1.1712	0.849176	1.31164	0.105695	-0.0294947	-1.34432	1.00709	0.599909	-0.150854	0.0753774	0.796928	-0.443661	-0.190246	-0.627084	2.16072	-0.524447	-0.269034	-2.47788	0.87927	-0.13228	-0.964807	-0.119728	3.83478	0.0122764	-0.160099	-0.703647	0.322725	0.451483	0.754247	-0.291368	-0.0933033	0.259017	0.0620616	0.472361	0.510121	-0.229559	0.594425	-0.0156943	-0.270688	0.55248	-0.440374	-0.149746	-0.545547	1.16614	2.11763	0.504944	0.67112	-0.0258823	0.0752198	-0.218461
1.1956	0.915894	1.30989	0.111346	-0.0355614	-1.32349	0.946608	0.620353	-0.138124	0.0742894	0.866331	-0.400936	-0.186216	-0.612124	2.18625	-0.54634	-0.256922	-2.40877	0.905095	-0.254542	-1.00604	-0.168821	3.83658	0.00717628	-0.115537	-0.703716	0.426564	0.400865	0.785572	-0.283035	-0.142128	0.201708	0.0675395	0.446782	0.49608	-0.276432	0.589686	0.0441712	-0.2576	0.552449	-0.448147	-0.109	-0.670604	1.14507	2.01579	0.495825	0.599215	-0.0104206	0.0890637	-0.188204
1.22	0.984175	1.30131	0.114225	-0.0483435	-1.30768	0.885239	0.644166	-0.136162	0.075258	0.947813	-0.385174	-0.195335	-0.582184	2.22289	-0.579303	-0.239579	-2.27446	0.926964	-0.374513	-1.04861	-0.223614	3.83954	0.0302458	-0.0748791	-0.703535	0.538466	0.347018	0.818669	-0.273879	-0.18393	0.1339	0.0726421	0.420985	0.478605	-0.303431	0.589841	0.0928824	-0.235133	0.552636	-0.466354	-0.0744	-0.813888	1.12186	1.91203	0.455823	0.516132	0.00105136	0.114005	-0.157293
1.2444	1.05406	1.28441	0.116263	-0.0659296	-1.29767	0.823161	0.663885	-0.141309	0.0775678	1.02884	-0.396031	-0.215375	-0.544209	2.26917	-0.609221	-0.221258	-2.12148	0.941918	-0.486906	-1.10077	-0.279782	3.84433	0.0801831	-0.0410912	-0.700552	0.638399	0.295069	0.851857	-0.26482	-0.216529	0.0689274	0.0828612	0.39364	0.460047	-0.315985	0.592077	0.13117	-0.208535	0.551297	-0.500121	-0.047	-0.965683	1.09983	1.80993	0.395612	0.426199	0.008288	0.15086	-0.12879
1.2688	1.12521	1.25915	0.11493	-0.0864533	-1.29334	0.761612	0.670184	-0.148652	0.0778941	1.09719	-0.428137	-0.24279	-0.509788	2.32103	-0.627277	-0.206144	-1.98191	0.947563	-0.584791	-1.17001	-0.333368	3.84985	0.149568	-0.0166892	-0.693641	0.714	0.248717	0.88179	-0.256921	-0.238688	0.0166686	0.103526	0.363319	0.442092	-0.325956	0.595668	0.162069	-0.183335	0.547607	-0.547203	-0.0274522	-1.11902	1.08152	1.71301	0.32827	0.333388	0.0117581	0.19784	-0.106244
1.2932	1.1965	1.22759	0.105986	-0.107861	-1.29212	0.703176	0.66057	-0.153329	0.0719806	1.14433	-0.47298	-0.273824	-0.488452	2.37116	-0.630812	-0.196524	-1.8778	0.943509	-0.660774	-1.25887	-0.381085	3.85326	0.226375	-0.00346582	-0.685084	0.764054	0.209666	0.904172	-0.251094	-0.249983	-0.0230006	0.1375	0.328478	0.427102	-0.340867	0.600086	0.18928	-0.164575	0.541483	-0.602473	-0.0154472	-1.26734	1.06819	1.62351	0.264631	0.241487	0.0127851	0.251478	-0.0924284
1.3176	1.26603	1.19266	0.088249	-0.12769	-1.28988	0.651049	0.641615	-0.151615	0.0570202	1.1676	-0.522239	-0.305209	-0.481722	2.4105	-0.620733	-0.191885	-1.8172	0.931723	-0.708743	-1.36379	-0.42317	3.85115	0.297855	-0.00179133	-0.678986	0.791395	0.177817	0.914909	-0.247969	-0.250485	-0.0569259	0.184155	0.287749	0.416871	-0.359031	0.603384	0.215661	-0.155963	0.533111	-0.661223	-0.00930639	-1.40183	1.06031	1.5417	0.213478	0.153893	0.0133738	0.309055	-0.0880938
1.342	1.33154	1.15599	0.0651833	-0.143081	-1.28403	0.608175	0.625859	-0.141453	0.0318522	1.16918	-0.57091	-0.334378	-0.484277	2.43086	-0.604171	-0.189543	-1.78164	0.915766	-0.726035	-1.47728	-0.463589	3.8407	0.355181	-0.010036	-0.677724	0.799269	0.152395	0.910995	-0.24813	-0.240706	-0.090065	0.240426	0.240339	0.410592	-0.371917	0.602309	0.242895	-0.159002	0.522474	-0.715964	-0.0059201	-1.51196	1.05843	1.4662	0.181529	0.0726632	0.0157877	0.368502	-0.0917713
1.3664	1.39053	1.11761	0.0418744	-0.151489	-1.27232	0.576962	0.627382	-0.122624	-0.00364405	1.15312	-0.618913	-0.359411	-0.492709	2.42672	-0.594854	-0.186176	-1.72888	0.899016	-0.715649	-1.59083	-0.503979	3.82028	0.395812	-0.0247244	-0.679829	0.794276	0.132561	0.890976	-0.252169	-0.221927	-0.119518	0.303002	0.18631	0.407031	-0.371578	0.594153	0.271363	-0.172835	0.509241	-0.754335	-0.00137767	-1.58635	1.06318	1.39551	0.171692	-0.00134626	0.0220301	0.426755	-0.100817
1.3908	1.44037	1.07796	0.0216417	-0.151997	-1.25077	0.559049	0.652481	-0.0965151	-0.0486244	1.12343	-0.669379	-0.3791	-0.506895	2.39566	-0.605335	-0.178998	-1.61856	0.883753	-0.684332	-1.69665	-0.541092	3.7895	0.421201	-0.0415121	-0.681071	0.784602	0.116763	0.855308	-0.260079	-0.195922	-0.137378	0.369499	0.126862	0.406954	-0.357282	0.578417	0.299754	-0.194959	0.493138	-0.764407	0.00815738	-1.61138	1.0748	1.32914	0.180954	-0.0671298	0.0333161	0.48007	-0.112926
1.4152	1.47854	1.03947	0.00492509	-0.146078	-1.21681	0.554794	0.692075	-0.0652697	-0.102479	1.0834	-0.724407	-0.393305	-0.524834	2.33871	-0.640855	-0.166199	-1.44259	0.871817	-0.637186	-1.78825	-0.571718	3.74925	0.43054	-0.0563679	-0.678562	0.773955	0.102611	0.806566	-0.27068	-0.163906	-0.139148	0.438137	0.0643382	0.410484	-0.333943	0.556681	0.325766	-0.222405	0.474305	-0.741722	0.0258971	-1.57824	1.09278	1.26742	0.200958	-0.123085	0.0496824	0.524659	-0.12687
1.4396	1.50304	1.00635	-0.00995043	-0.137112	-1.17427	0.562744	0.727332	-0.0307443	-0.165774	1.03571	-0.781497	-0.403136	-0.542638	2.26066	-0.701519	-0.147095	-1.23156	0.865763	-0.577612	-1.86206	-0.595579	3.7019	0.417463	-0.0663387	-0.673148	0.760396	0.088134	0.748889	-0.28193	-0.126169	-0.126911	0.50719	0.00171917	0.415383	-0.306809	0.530803	0.347678	-0.253078	0.453364	-0.692208	0.0539133	-1.49579	1.11585	1.21108	0.223863	-0.167452	0.0700803	0.55747	-0.142147
1.464	1.51259	0.98309	-0.0256588	-0.129037	-1.13361	0.579656	0.743138	0.00585313	-0.2381	0.983821	-0.833001	-0.410569	-0.55881	2.16903	-0.78284	-0.122139	-1.02917	0.86945	-0.512682	-1.91974	-0.612158	3.65113	0.375509	-0.0698202	-0.666457	0.739445	0.0728632	0.686742	-0.291866	-0.0830569	-0.106741	0.574735	-0.0578642	0.42068	-0.281108	0.501829	0.364956	-0.286545	0.431367	-0.629089	0.0928011	-1.38941	1.14245	1.16165	0.247891	-0.198514	0.0931207	0.578693	-0.158678
1.4884	1.50672	0.972022	-0.0457079	-0.124806	-1.10752	0.601331	0.735824	0.0437792	-0.315491	0.932523	-0.869693	-0.41769	-0.5786	2.07197	-0.870424	-0.0926851	-0.864828	0.887024	-0.452125	-1.9677	-0.619923	3.60062	0.305446	-0.0665239	-0.657631	0.706492	0.0573703	0.623763	-0.299341	-0.0357812	-0.0865023	0.638494	-0.111394	0.429107	-0.263652	0.471543	0.377744	-0.323488	0.409889	-0.567626	0.141879	-1.28447	1.17183	1.12168	0.274461	-0.215508	0.117937	0.592141	-0.177095
[truncated: 86 more columns]

## Sheet: Figure2D,E,F- Supp 2-3
														CUE (VTA)
Block (Block 1= 0%, Block 2=6%, block3=10%)	1	1	1	1	2	2	2	2	3	3	3	3	1	1	1	1	2	2	2	2	3	3	1	1	1	1	2	2	2	2	3	3	3					1	1	1	1	2	2	2	2	3	3	3	3
Session	JP1	JP1	JP1	JP1	JP1	JP1	JP1	JP1	JP1	JP1	JP1	JP1	JP2	JP2	JP2	JP2	JP2	JP2	JP2	JP2	JP2	JP2	JP3	JP3	JP3	JP3	JP3	JP3	JP3	JP3	JP3	JP3	JP3					JP1	JP1	JP1	JP1	JP1	JP1	JP1	JP1	JP1	JP1	JP1	JP1
Subject	S251	S252	S256	S320	S251	S252	S256	S320	S251	S252	S256	S320	S251	S252	S256	S320	S251	S252	S256	S320	S252	S320	S251	S252	S256	S320	S251	S252	S256	S320	S251	S252	S320					S251	S252	S256	S320	S251	S252	S256	S320	S251	S252	S256	S320
Time (peri-cue - sec)	Z-score of df/f	Z-score of df/f	Z-score of df/f	Z-score of df/f	Z-score of df/f	Z-score of df/f	Z-score of df/f	Z-score of df/f	Z-score of df/f	Z-score of df/f	Z-score of df/f	Z-score of df/f	Z-score of df/f	Z-score of df/f	Z-score of df/f	Z-score of df/f	Z-score of df/f	Z-score of df/f	Z-score of df/f	Z-score of df/f	Z-score of df/f	Z-score of df/f	Z-score of df/f	Z-score of df/f	Z-score of df/f	Z-score of df/f	Z-score of df/f	Z-score of df/f	Z-score of df/f	Z-score of df/f	Z-score of df/f	Z-score of df/f	Z-score of df/f				Time (peri-action - sec)	Z-score of df/f	Z-score of df/f	Z-score of df/f	Z-score of df/f	Z-score of df/f	Z-score of df/f	Z-score of df/f	Z-score of df/f	Z-score of df/f	Z-score of df/f	Z-score of df/f	Z-score of df/f
-1.5128	-0.534283	0.0139973	-0.37458	-0.11761	-0.0221062	0.240226	0.691681	-0.705067	-0.28942	-1.52504	0.00187588	0.218256	-0.422315	-0.203271	-0.776133	0.149651	0.251071	-0.390612	0.101228	0.63414	-3.77296	1.49827	-0.676106	0.0712649	0.210013	-0.235635	0.699817	-0.714872	1.7457	-0.108185	-0.510112	0.340203	-0.36256				-2.0252	-0.079	-0.042	0.44	0.156	-0.248	0.047	0.09	-0.351	0.151	-0.458	-0.271	0.104
-1.4884	-0.583212	0.00833093	-0.37651	-0.148939	-0.0529011	0.254951	0.663439	-0.739185	-0.288622	-1.63691	-0.0131915	0.174526	-0.421498	-0.172289	-0.788461	0.124526	0.310483	-0.364205	0.15514	0.615956	-3.8349	1.49812	-0.627791	0.0701865	0.24681	-0.280111	0.723397	-0.753621	1.64366	-0.120565	-0.557542	0.364766	-0.0501592				-2.0008	-0.074	-0.016	0.448	0.144	-0.179	0.022	0.102	-0.323	0.132	-0.511	-0.237	0.124
-1.464	-0.62811	0.000510692	-0.387833	-0.18861	-0.0765175	0.278423	0.630958	-0.758331	-0.286115	-1.73693	-0.0226289	0.14286	-0.424167	-0.146891	-0.776286	0.0951579	0.36413	-0.330364	0.211245	0.589816	-3.90294	1.51823	-0.578448	0.0745126	0.276791	-0.326193	0.743497	-0.787118	1.51514	-0.130104	-0.600632	0.394372	0.33116				-1.9764	-0.069	0.008	0.441	0.132	-0.102	0.006	0.131	-0.286	0.1	-0.59	-0.19	0.137
-1.4396	-0.66627	-0.00881554	-0.405862	-0.232386	-0.0903046	0.306293	0.599928	-0.760851	-0.285367	-1.82895	-0.0221458	0.121965	-0.430215	-0.128403	-0.740562	0.0648952	0.410528	-0.294454	0.267133	0.552683	-3.97347	1.51095	-0.53514	0.0820356	0.296155	-0.372467	0.751968	-0.812235	1.36498	-0.133791	-0.633762	0.428792	0.721184				-1.952	-0.063	0.029	0.419	0.126	-0.028	0	0.179	-0.249	0.064	-0.7	-0.135	0.152
-1.4152	-0.695693	-0.0187371	-0.426922	-0.277132	-0.0931743	0.334358	0.574519	-0.751299	-0.288218	-1.90703	-0.010502	0.106895	-0.43821	-0.116933	-0.683056	0.035631	0.448079	-0.26071	0.319132	0.506289	-4.04186	1.4578	-0.503722	0.0886858	0.30506	-0.416542	0.744527	-0.831894	1.20727	-0.129578	-0.662322	0.465547	1.04296				-1.9276	-0.055	0.045	0.382	0.124	0.035	0.005	0.245	-0.214	0.035	-0.843	-0.077	0.178
-1.3908	-0.715513	-0.0271354	-0.447548	-0.319055	-0.0844753	0.360308	0.557389	-0.73695	-0.295059	-1.95948	0.0107466	0.0958873	-0.447625	-0.110861	-0.606219	0.00677422	0.47488	-0.231264	0.362785	0.457741	-4.1037	1.37453	-0.486666	0.0919712	0.305812	-0.456556	0.721753	-0.852558	1.06094	-0.115807	-0.69287	0.50078	1.23523				-1.9032	-0.044	0.056	0.337	0.123	0.081	0.018	0.328	-0.18	0.019	-1.019	-0.019	0.216
-1.3664	-0.726545	-0.0314069	-0.465672	-0.35111	-0.0661652	0.382334	0.54926	-0.723113	-0.307203	-1.98161	0.0392542	0.0936843	-0.458817	-0.107275	-0.512748	-0.023235	0.490003	-0.206663	0.392633	0.414705	-4.15674	1.27992	-0.48297	0.0928107	0.301371	-0.490746	0.686543	-0.877921	0.941004	-0.092802	-0.726427	0.531603	1.26848				-1.8788	-0.03	0.06	0.288	0.123	0.108	0.037	0.422	-0.148	0.019	-1.222	0.034	0.265
-1.342	-0.731453	-0.0310424	-0.479745	-0.366282	-0.0457968	0.397732	0.549018	-0.711258	-0.325691	-1.98128	0.0731551	0.106726	-0.471458	-0.10303	-0.407192	-0.0539253	0.494004	-0.187869	0.402047	0.381236	-4.20163	1.18148	-0.489502	0.09524	0.294758	-0.515729	0.641696	-0.904713	0.855864	-0.0598544	-0.756625	0.557432	1.15126				-1.8544	-0.013	0.059	0.243	0.129	0.118	0.058	0.523	-0.118	0.04	-1.442	0.076	0.322
-1.3176	-0.734351	-0.0288366	-0.487722	-0.363037	-0.0336217	0.403835	0.554074	-0.700917	-0.347677	-1.97176	0.11015	0.136277	-0.485036	-0.0955997	-0.297417	-0.0825248	0.48923	-0.178057	0.386977	0.357215	-4.24022	1.09062	-0.502457	0.103776	0.287888	-0.526924	0.590022	-0.924409	0.806738	-0.0127684	-0.772267	0.580279	0.931592				-1.83	0.006	0.052	0.208	0.144	0.115	0.08	0.625	-0.084	0.086	-1.667	0.101	0.383
-1.2932	-0.740501	-0.0289657	-0.488319	-0.346061	-0.0360678	0.399369	0.560554	-0.691605	-0.365779	-1.96435	0.146591	0.17813	-0.500079	-0.0834038	-0.193441	-0.106651	0.479726	-0.181522	0.349722	0.338777	-4.27215	1.03699	-0.517944	0.120339	0.281418	-0.522226	0.535306	-0.927969	0.780917	0.0530517	-0.763475	0.604725	0.676888				-1.8056	0.028	0.04	0.184	0.168	0.106	0.1	0.723	-0.037	0.157	-1.88	0.107	0.445
-1.2688	-0.755072	-0.0347389	-0.482122	-0.321682	-0.0534593	0.384915	0.564263	-0.68293	-0.372065	-1.96775	0.179191	0.226181	-0.517424	-0.065694	-0.104976	-0.126342	0.46918	-0.200316	0.297749	0.319073	-4.29292	1.05409	-0.531907	0.14362	0.275372	-0.503632	0.482019	-0.909762	0.752511	0.138191	-0.728265	0.636146	0.445442				-1.7812	0.048	0.023	0.172	0.199	0.094	0.116	0.81	0.029	0.249	-2.072	0.092	0.502
-1.2444	-0.780435	-0.0476625	-0.471238	-0.292431	-0.0821321	0.362138	0.562224	-0.675202	-0.362624	-1.98867	0.207843	0.273121	-0.537558	-0.0422297	-0.0388477	-0.143582	0.458536	-0.232708	0.240498	0.290871	-4.29522	1.15319	-0.540667	0.171178	0.268606	-0.473807	0.434093	-0.870034	0.701414	0.235638	-0.67402	0.677289	0.275056				-1.7568	0.063	-0.001	0.169	0.236	0.082	0.129	0.884	0.108	0.355	-2.238	0.059	0.549
-1.22	-0.814862	-0.0667624	-0.458625	-0.256941	-0.116634	0.332101	0.553584	-0.669861	-0.338489	-2.03162	0.23605	0.310663	-0.560948	-0.0130558	0.00296642	-0.160306	0.446386	-0.274354	0.18686	0.249355	-4.27142	1.32303	-0.541979	0.201432	0.258814	-0.433924	0.393443	-0.815369	0.629444	0.332893	-0.613512	0.72625	0.188705				-1.7324	0.075	-0.032	0.17	0.28	0.073	0.137	0.939	0.192	0.462	-2.386	0.013	0.582
-1.1956	-0.854156	-0.0887705	-0.447279	-0.216849	-0.151605	0.295141	0.539471	-0.667613	-0.304069	-2.10043	0.267984	0.333303	-0.58705	0.0212701	0.0228156	-0.176926	0.431495	-0.319347	0.140897	0.192659	-4.21531	1.54691	-0.535177	0.232866	0.243737	-0.386353	0.35842	-0.755393	0.551471	0.419398	-0.558655	0.778165	0.201023				-1.708	0.088	-0.068	0.17	0.33	0.067	0.143	0.972	0.268	0.558	-2.528	-0.037	0.596
-1.1712	-0.89346	-0.109919	-0.439383	-0.18152	-0.184017	0.253579	0.52201	-0.666288	-0.265803	-2.19797	0.304868	0.340956	-0.613115	0.0590387	0.0242869	-0.192738	0.414155	-0.360794	0.0988217	0.121443	-4.12386	1.81021	-0.520637	0.26211	0.223024	-0.336151	0.323946	-0.698177	0.476905	0.489671	-0.512515	0.829113	0.305383				-1.6836	0.108	-0.106	0.167	0.38	0.064	0.147	0.984	0.327	0.633	-2.671	-0.082	0.591
-1.1468	-0.927797	-0.127389	-0.435272	-0.163549	-0.21383	0.21356	0.502927	-0.660717	-0.231692	-2.32057	0.343502	0.337213	-0.634287	0.097254	0.00966998	-0.20743	0.395004	-0.392218	0.053929	0.0388907	-3.99852	2.09415	-0.499526	0.284681	0.200175	-0.287868	0.284483	-0.648626	0.406344	0.540821	-0.470362	0.879512	0.458477				-1.6592	0.137	-0.14	0.159	0.425	0.06	0.152	0.976	0.366	0.681	-2.814	-0.116	0.574
-1.1224	-0.953109	-0.139366	-0.432626	-0.171369	-0.241579	0.182691	0.482772	-0.644422	-0.21017	-2.45577	0.377061	0.327759	-0.644441	0.132727	-0.0197272	-0.221298	0.374139	-0.408736	0.0044808	-0.0496759	-3.84507	2.36638	-0.473699	0.298558	0.180765	-0.243068	0.237493	-0.608909	0.336893	0.569528	-0.437204	0.935321	0.602253				-1.6348	0.173	-0.165	0.147	0.462	0.054	0.157	0.956	0.388	0.702	-2.951	-0.136	0.56
-1.098	-0.967725	-0.14515	-0.427107	-0.206217	-0.265209	0.16573	0.461826	-0.613158	-0.207221	-2.58856	0.397385	0.319677	-0.638382	0.163603	-0.0614455	-0.233944	0.351951	-0.40742	-0.0455044	-0.137665	-3.67275	2.59171	-0.445549	0.307118	0.167614	-0.201158	0.184486	-0.579284	0.265151	0.572567	-0.437441	1.006	0.698502				-1.6104	0.213	-0.18	0.133	0.494	0.047	0.161	0.927	0.4	0.694	-3.073	-0.141	0.561
-1.0736	-0.972135	-0.145255	-0.414667	-0.262895	-0.280156	0.162646	0.441555	-0.569407	-0.22471	-2.70735	0.398761	0.318385	-0.614308	0.189903	-0.110801	-0.243689	0.328492	-0.387833	-0.089993	-0.218247	-3.49471	2.75648	-0.418026	0.318143	0.160088	-0.159299	0.129141	-0.559925	0.190305	0.551374	-0.497722	1.09949	0.736943				-1.586	0.258	-0.188	0.117	0.521	0.042	0.165	0.894	0.406	0.658	-3.178	-0.134	0.581
-1.0492	-0.967618	-0.140567	-0.394081	-0.332578	-0.282795	0.170558	0.423791	-0.522553	-0.260883	-2.80466	0.38181	0.325277	-0.574495	0.212792	-0.162768	-0.248516	0.302465	-0.352043	-0.122521	-0.285984	-3.32754	2.87262	-0.394302	0.338705	0.157778	-0.112215	0.0745194	-0.551774	0.113989	0.513877	-0.624617	1.21615	0.731131				-1.5616	0.306	-0.19	0.102	0.542	0.043	0.169	0.86	0.407	0.592	-3.262	-0.118	0.611
-1.0248	-0.956107	-0.131788	-0.367496	-0.406823	-0.273548	0.18708	0.408311	-0.481968	-0.310114	-2.87749	0.353909	0.338838	-0.524047	0.233504	-0.214545	-0.2484	0.272792	-0.303952	-0.137752	-0.339188	-3.18723	2.96575	-0.376523	0.369999	0.162693	-0.0551764	0.0222458	-0.555045	0.0390947	0.46916	-0.802175	1.34484	0.702826				-1.5372	0.358	-0.189	0.089	0.557	0.051	0.173	0.827	0.4	0.502	-3.327	-0.094	0.638
-1.0004	-0.941222	-0.120249	-0.338691	-0.479613	-0.257511	0.212023	0.392372	-0.450177	-0.363044	-2.9268	0.324875	0.356263	-0.468245	0.25278	-0.265373	-0.246637	0.238985	-0.249835	-0.134756	-0.380982	-3.08423	3.06393	-0.364615	0.407473	0.178824	0.0136152	-0.0266838	-0.567729	-0.0264736	0.421638	-1.00663	1.46571	0.657251				-1.5128	0.411	-0.188	0.082	0.566	0.066	0.177	0.798	0.386	0.399	-3.375	-0.067	0.651
-0.976	-0.928119	-0.10866	-0.310983	-0.545607	-0.242436	0.246399	0.373222	-0.424652	-0.409666	-2.95259	0.301676	0.375188	-0.411235	0.270837	-0.314683	-0.24733	0.199368	-0.198156	-0.118328	-0.416858	-3.02221	3.18367	-0.356704	0.446118	0.210103	0.0930525	-0.0711436	-0.585858	-0.0693235	0.37223	-1.21996	1.55988	0.584852				-1.4884	0.461	-0.188	0.086	0.568	0.087	0.184	0.774	0.369	0.298	-3.417	-0.041	0.642
-0.9516	-0.92106	-0.099947	-0.285728	-0.597995	-0.234578	0.289488	0.350114	-0.403988	-0.442267	-2.95028	0.286814	0.395156	-0.357374	0.287716	-0.361221	-0.252348	0.151841	-0.155867	-0.0960782	-0.450766	-2.99913	3.32151	-0.350929	0.484704	0.257265	0.179416	-0.108512	-0.604652	-0.0772552	0.323682	-1.43035	1.61892	0.483171				-1.464	0.505	-0.19	0.101	0.561	0.114	0.195	0.758	0.352	0.212	-3.465	-0.02	0.614
-0.9272	-0.921486	-0.0950738	-0.261966	-0.629876	-0.235562	0.336626	0.323119	-0.387843	-0.456105	-2.91388	0.280423	0.415699	-0.311611	0.303741	-0.403106	-0.260303	0.0970973	-0.124476	-0.0736968	-0.483229	-3.00764	3.45919	-0.346763	0.524704	0.316193	0.267124	-0.133682	-0.619246	-0.0441126	0.282418	-1.62537	1.64705	0.365953				-1.4396	0.54	-0.193	0.127	0.544	0.147	0.211	0.751	0.34	0.148	-3.527	-0.003	0.575
-0.9028	-0.928526	-0.0931921	-0.237804	-0.63762	-0.243449	0.380211	0.290962	-0.372364	-0.449788	-2.83937	0.282126	0.43498	-0.277128	0.319455	-0.43806	-0.265819	0.0405644	-0.100333	-0.0534525	-0.511723	-3.03654	3.57982	-0.344823	0.566207	0.378956	0.348731	-0.141263	-0.625275	0.0297388	0.255294	-1.79113	1.65593	0.253657				-1.4152	0.569	-0.198	0.16	0.518	0.188	0.233	0.749	0.327	0.106	-3.605	0.013	0.538
-0.8784	-0.939334	-0.0939657	-0.211909	-0.622898	-0.255992	0.413264	0.25045	-0.350829	-0.424111	-2.72591	0.291148	0.45221	-0.254112	0.334849	-0.463604	-0.261097	-0.00921437	-0.0782931	-0.0357766	-0.532272	-3.07412	3.68392	-0.346026	0.606024	0.435681	0.414375	-0.129613	-0.620605	0.13757	0.246822	-1.91732	1.65801	0.157541				-1.3908	0.596	-0.205	0.198	0.484	0.233	0.257	0.749	0.311	0.084	-3.701	0.034	0.512
-0.854	-0.949462	-0.098179	-0.183769	-0.59303	-0.272206	0.43184	0.197552	-0.320073	-0.379239	-2.57782	0.306022	0.467854	-0.241682	0.348866	-0.476966	-0.241221	-0.0453961	-0.0548882	-0.0193976	-0.541833	-3.11131	3.78122	-0.350817	0.639503	0.476923	0.45532	-0.102496	-0.60754	0.268372	0.25987	-1.99883	1.66217	0.0845358				-1.3664	0.625	-0.214	0.239	0.445	0.279	0.283	0.747	0.285	0.075	-3.815	0.065	0.488
-0.8296	-0.955473	-0.106333	-0.153406	-0.558982	-0.291869	0.434444	0.129329	-0.284527	-0.315679	-2.40488	0.324236	0.481885	-0.239885	0.360315	-0.475659	-0.207933	-0.0664919	-0.0290546	-0.00148144	-0.540609	-3.14243	3.86938	-0.358634	0.663393	0.497273	0.470742	-0.0666493	-0.592303	0.409727	0.29473	-2.0333	1.6719	0.0549805				-1.342	0.657	-0.224	0.279	0.402	0.322	0.307	0.743	0.246	0.079	-3.949	0.106	0.456
-0.8052	-0.956539	-0.118247	-0.120966	-0.530761	-0.314255	0.421017	0.0458323	-0.252743	-0.237846	-2.22068	0.34259	0.49507	-0.249458	0.369775	-0.459338	-0.167317	-0.0754884	-0.00129428	0.0191912	-0.531961	-3.16352	3.93449	-0.368048	0.677098	0.498047	0.47011	-0.0276593	-0.581287	0.547802	0.345622	-2.02176	1.68694	0.0904413				-1.3176	0.69	-0.236	0.317	0.359	0.356	0.327	0.737	0.195	0.097	-4.103	0.153	0.413
-0.7808	-0.95292	-0.133932	-0.0867798	-0.513052	-0.337026	0.392968	-0.0483779	-0.230162	-0.152827	-2.03952	0.359004	0.511336	-0.270397	0.380429	-0.431152	-0.124765	-0.0765441	0.0280807	0.0393912	-0.518833	-3.17062	3.9602	-0.377687	0.681608	0.485492	0.466861	0.0125732	-0.577833	0.668924	0.402133	-1.97353	1.70574	0.187421				-1.2932	0.717	-0.248	0.35	0.317	0.383	0.339	0.733	0.133	0.129	-4.268	0.2	0.368
-0.7564	-0.944458	-0.153895	-0.0518743	-0.504564	-0.356556	0.352924	-0.143863	-0.216464	-0.0668091	-1.87184	0.373902	0.536934	-0.301227	0.39646	-0.397219	-0.0832864	-0.0725996	0.0608676	0.0516998	-0.501263	-3.15903	3.93126	-0.387131	0.678174	0.4654	0.467781	0.0555646	-0.582199	0.76583	0.456171	-1.90809	1.72589	0.316462				-1.2688	0.732	-0.261	0.382	0.278	0.404	0.341	0.733	0.068	0.173	-4.438	0.243	0.331
-0.732	-0.930967	-0.178178	-0.0178498	-0.501568	-0.369777	0.304284	-0.228192	-0.208934	0.014908	-1.72657	0.389074	0.574406	-0.339992	0.420335	-0.364682	-0.0450644	-0.0651223	0.100801	0.0475333	-0.47775	-3.1233	3.84824	-0.396759	0.668873	0.439512	0.469232	0.102882	-0.593694	0.839608	0.506406	-1.85016	1.74401	0.434905				-1.2444	0.733	-0.275	0.417	0.243	0.42	0.334	0.739	0.007	0.218	-4.606	0.283	0.306
-0.7076	-0.913187	-0.205254	0.0135892	-0.500764	-0.375476	0.251182	-0.289192	-0.204563	0.087357	-1.62168	0.405328	0.618153	-0.38575	0.451334	-0.339355	-0.0125915	-0.0554917	0.15067	0.022752	-0.446876	-3.05877	3.74002	-0.406557	0.657777	0.40673	0.464756	0.152314	-0.612257	0.89455	0.556449	-1.82047	1.75678	0.505683				-1.22	0.723	-0.285	0.458	0.216	0.431	0.321	0.747	-0.042	0.257	-4.775	0.324	0.294
-0.6832	-0.892529	-0.232728	0.0405635	-0.497692	-0.373493	0.198065	-0.317686	-0.199578	0.147508	-1.5865	0.422137	0.660559	-0.437933	0.486078	-0.323988	0.0114047	-0.045407	0.209044	-0.0185256	-0.408322	-2.96431	3.6467	-0.415241	0.649956	0.367383	0.452041	0.198283	-0.637845	0.93856	0.608888	-1.82371	1.76225	0.52432				-1.1956	0.707	-0.29	0.507	0.202	0.433	0.306	0.757	-0.077	0.286	-4.943	0.372	0.289
-0.6588	-0.86992	-0.259723	0.0614049	-0.485766	-0.363305	0.148265	-0.309053	-0.191052	0.195524	-1.64788	0.439303	0.700309	-0.494203	0.520177	-0.318168	0.0253117	-0.0351015	0.269752	-0.0665808	-0.364366	-2.84353	3.58742	-0.42069	0.648655	0.325584	0.431256	0.236008	-0.668511	0.985506	0.659734	-1.84221	1.76017	0.517168				-1.1712	0.687	-0.284	0.566	0.201	0.427	0.291	0.768	-0.098	0.302	-5.109	0.433	0.288
-0.6344	-0.845414	-0.287839	0.075998	-0.459281	-0.343836	0.102898	-0.263975	-0.179277	0.234405	-1.81323	0.457667	0.740117	-0.550737	0.549662	-0.319833	0.0304425	-0.0219758	0.324924	-0.111376	-0.320143	-2.70401	3.55158	-0.421278	0.654026	0.28636	0.40391	0.264793	-0.699905	1.04421	0.699402	-1.84833	1.75198	0.506954				-1.1468	0.664	-0.271	0.635	0.213	0.413	0.276	0.781	-0.111	0.306	-5.269	0.511	0.297
-0.61	-0.818957	-0.319662	0.0860319	-0.415677	-0.314255	0.062025	-0.188563	-0.168907	0.268916	-2.06416	0.478282	0.778834	-0.604596	0.571762	-0.327075	0.0305666	-0.0018392	0.368791	-0.145392	-0.281716	-2.55626	3.51584	-0.416959	0.664485	0.251618	0.374812	0.287673	-0.726936	1.10847	0.719933	-1.82432	1.74122	0.494575				-1.1224	0.64	-0.251	0.713	0.234	0.394	0.261	0.795	-0.121	0.299	-5.416	0.606	0.324
-0.5856	-0.791184	-0.357159	0.093133	-0.355968	-0.275815	0.0265073	-0.0927316	-0.168246	0.304425	-2.36346	0.501397	0.80925	-0.654426	0.585492	-0.338976	0.0291313	0.0276778	0.399364	-0.165554	-0.252881	-2.41143	3.46084	-0.40893	0.678459	0.221144	0.349496	0.307991	-0.745353	1.16479	0.718289	-1.76563	1.73286	0.466172				-1.098	0.62	-0.229	0.794	0.26	0.372	0.246	0.81	-0.129	0.285	-5.539	0.712	0.374
-0.5612	-0.763294	-0.400985	0.0970509	-0.285852	-0.233145	-0.00255852	0.0129323	-0.184252	0.346367	-2.66861	0.525936	0.823073	-0.699902	0.59191	-0.355453	0.0266691	0.0647649	0.417461	-0.174281	-0.232709	-2.27754	3.38148	-0.398159	0.694779	0.196184	0.329893	0.326159	-0.75271	1.20398	0.692154	-1.67673	1.73159	0.407961				-1.0736	0.605	-0.206	0.873	0.287	0.348	0.232	0.823	-0.137	0.265	-5.625	0.826	0.445
-0.5368	-0.736189	-0.44998	0.0963572	-0.214501	-0.192302	-0.0255837	0.118914	-0.216799	0.400212	-2.94374	0.549127	0.817562	-0.741349	0.593519	-0.377017	0.0205528	0.104496	0.424671	-0.17683	-0.216172	-2.15699	3.28964	-0.384739	0.711685	0.178493	0.314882	0.339814	-0.749822	1.2242	0.638765	-1.57553	1.74084	0.322002				-1.0492	0.601	-0.184	0.946	0.312	0.323	0.219	0.832	-0.142	0.24	-5.668	0.943	0.532
-0.5124	-0.710119	-0.50081	0.0909634	-0.148345	-0.157598	-0.043985	0.21716	-0.258687	0.470154	-3.16599	0.566296	0.798238	-0.779026	0.593276	-0.404166	0.00757188	0.1411	0.422429	-0.178154	-0.198291	-2.0478	3.204	-0.36896	0.725855	0.167169	0.303424	0.347189	-0.741564	1.22988	0.559815	-1.49275	1.7626	0.223939				-1.0248	0.607	-0.162	1.006	0.333	0.302	0.21	0.835	-0.145	0.211	-5.669	1.062	0.631
-0.488	-0.685829	-0.548551	0.0836948	-0.0872671	-0.130735	-0.0580841	0.301922	-0.300546	0.556536	-3.3242	0.572239	0.774938	-0.81307	0.593969	-0.436201	-0.0129071	0.169751	0.412203	-0.182664	-0.178994	-1.94728	3.14122	-0.352878	0.733766	0.159798	0.295599	0.350274	-0.735241	1.22975	0.461633	-1.46084	1.79717	0.12338				-1.0004	0.621	-0.139	1.05	0.353	0.289	0.209	0.831	-0.148	0.176	-5.636	1.178	0.735
-0.4636	-0.666057	-0.588791	0.0797914	-0.0293123	-0.111876	-0.0665804	0.369422	-0.333976	0.654142	-3.41356	0.563795	0.755687	-0.844131	0.597898	-0.471792	-0.0385103	0.18814	0.395311	-0.193601	-0.162242	-1.85539	3.11684	-0.339905	0.734224	0.155029	0.291133	0.354259	-0.737004	1.23444	0.349704	-1.50664	1.84242	0.015242				-0.976	0.641	-0.117	1.076	0.373	0.288	0.218	0.821	-0.158	0.135	-5.585	1.286	0.837
-0.4392	-0.655466	-0.619798	0.085049	0.0238745	-0.101172	-0.0676344	0.416212	-0.350676	0.753416	-3.43379	0.541175	0.74552	-0.87232	0.606657	-0.510887	-0.0670099	0.196592	0.372357	-0.211544	-0.149091	-1.77585	3.14157	-0.332236	0.728242	0.152851	0.288631	0.363118	-0.748854	1.25536	0.226407	-1.65063	1.89234	-0.109091				-0.9516	0.665	-0.096	1.085	0.394	0.296	0.236	0.808	-0.179	0.088	-5.532	1.376	0.927
-0.4148	-0.658514	-0.642536	0.10358	0.0678545	-0.0993728	-0.0597481	0.439529	-0.343827	0.84475	-3.39094	0.507366	0.748677	-0.895349	0.621104	-0.554552	-0.0995147	0.196668	0.343124	-0.23517	-0.134688	-1.71412	3.20774	-0.329449	0.716741	0.153881	0.286749	0.375421	-0.768502	1.30146	0.0942297	-1.90764	1.9368	-0.242971				-0.9272	0.691	-0.08	1.083	0.415	0.31	0.258	0.792	-0.215	0.035	-5.494	1.441	1
-0.3904	-0.676736	-0.659231	0.136173	0.0983588	-0.106718	-0.0420793	0.438748	-0.314105	0.92195	-3.29739	0.466217	0.76722	-0.909191	0.641472	-0.601996	-0.139743	0.190138	0.307317	-0.26288	-0.112406	-1.67316	3.28589	-0.329976	0.699451	0.157748	0.283984	0.385265	-0.79207	1.3746	-0.0407819	-2.28341	1.96477	-0.363695				-0.9028	0.72	-0.071	1.072	0.432	0.322	0.28	0.773	-0.265	-0.02	-5.482	1.477	1.054
-0.366	-0.708191	-0.672366	0.179894	0.112735	-0.121559	-0.0148132	0.414733	-0.271539	0.981659	-3.16878	0.420341	0.796882	-0.911466	0.667267	-0.6482	-0.190323	0.178609	0.265936	-0.293342	-0.0787635	-1.65043	3.34267	-0.333286	0.675994	0.162398	0.27721	0.387363	-0.817194	1.46878	-0.169741	-2.76393	1.96897	-0.45671				-0.8784	0.749	-0.069	1.059	0.439	0.33	0.302	0.75	-0.332	-0.073	-5.499	1.485	1.088
-0.3416	-0.748647	-0.684478	0.228817	0.111014	-0.140338	0.0203768	0.368642	-0.228771	1.02159	-3.01931	0.370703	0.829579	-0.904291	0.69707	-0.686879	-0.249886	0.163695	0.222305	-0.326201	-0.0353239	-1.63905	3.3564	-0.340233	0.648262	0.165798	0.263481	0.380404	-0.843868	1.57045	-0.282007	-3.30869	1.94859	-0.529573				-0.854	0.775	-0.077	1.046	0.435	0.333	0.325	0.727	-0.414	-0.118	-5.543	1.473	1.105
-0.3172	-0.792033	-0.698712	0.276199	0.0966281	-0.159199	0.0612126	0.302718	-0.193297	1.0405	-2.85841	0.318083	0.860647	-0.893575	0.728716	-0.716228	-0.312766	0.148252	0.181572	-0.361902	0.013009	-1.63227	3.31443	-0.351159	0.6215	0.166904	0.243603	0.366601	-0.87271	1.66056	-0.366375	-3.86071	1.9093	-0.59652				-0.8296	0.794	-0.092	1.035	0.423	0.331	0.349	0.71	-0.504	-0.152	-5.602	1.45	1.111
-0.2928	-0.830767	-0.718875	0.317732	0.0754521	-0.176283	0.106212	0.221752	-0.165245	1.03868	-2.6906	0.264803	0.889156	-0.885328	0.75986	-0.73935	-0.371036	0.136921	0.148605	-0.398608	0.0607685	-1.62709	3.21223	-0.363848	0.601171	0.164282	0.221728	0.349561	-0.90261	1.72418	-0.416047	-4.36971	1.86059	-0.649263				-0.8052	0.802	-0.113	1.029	0.41	0.327	0.374	0.704	-0.599	-0.172	-5.661	1.424	1.108
-0.2684	-0.857567	-0.747859	0.352655	0.0531641	-0.193067	0.153432	0.132894	-0.139735	1.01803	-2.51745	0.214946	0.914426	-0.882273	0.788547	-0.759829	-0.417805	0.134065	0.126167	-0.43066	0.102596	-1.62461	3.05868	-0.374335	0.588353	0.155159	0.201726	0.331538	-0.930672	1.76007	-0.431758	-4.80934	1.81128	-0.642492				-0.7808	0.797	-0.135	1.026	0.403	0.323	0.397	0.708	-0.693	-0.177	-5.706	1.402	1.097
-0.244	-0.86772	-0.785832	0.381024	0.0327714	-0.213755	0.198477	0.0443451	-0.110004	0.982527	-2.33883	0.172931	0.935807	-0.883329	0.813687	-0.77921	-0.449605	0.140998	0.115344	-0.451809	0.133345	-1.62736	2.86969	-0.38045	0.579175	0.137454	0.185141	0.311134	-0.954703	1.78038	-0.419988	-5.17247	1.76628	-0.520243				-0.7564	0.781	-0.156	1.024	0.401	0.317	0.412	0.72	-0.781	-0.167	-5.735	1.386	1.081
-0.2196	-0.859314	-0.829665	0.400872	0.01488	-0.242714	0.235728	-0.0354998	-0.0709638	0.938234	-2.15527	0.14194	0.952625	-0.885872	0.835345	-0.797534	-0.466523	0.154979	0.117121	-0.458812	0.149421	-1.63515	2.65977	-0.384115	0.56804	0.111758	0.172115	0.28391	-0.974793	1.80166	-0.39017	-5.45123	1.72635	-0.25839				-0.732	0.756	-0.169	1.02	0.397	0.306	0.418	0.737	-0.857	-0.145	-5.751	1.373	1.065
-0.1952	-0.831926	-0.873937	0.409037	-0.000464299	-0.280966	0.260931	-0.0992833	-0.0243456	0.89115	-1.97263	0.12251	0.964405	-0.888649	0.854483	-0.813957	-0.471216	0.170109	0.132005	-0.453986	0.150224	-1.64217	2.44409	-0.389578	0.551096	0.0800176	0.16364	0.245723	-0.992194	1.83353	-0.351813	-5.62324	1.68928	0.12565				-0.7076	0.731	-0.171	1.016	0.385	0.284	0.415	0.75	-0.916	-0.118	-5.766	1.36	1.059
-0.1708	-0.786905	-0.912733	0.403713	-0.014316	-0.324755	0.27271	-0.143386	0.0203671	0.844428	-1.80285	0.11194	0.973033	-0.892711	0.872078	-0.825938	-0.467844	0.179723	0.15767	-0.446424	0.137699	-1.63786	2.23766	-0.399488	0.528215	0.0442577	0.16188	0.196019	-1.0066	1.87154	-0.312957	-5.65725	1.65101	0.589259				-0.6832	0.712	-0.162	1.015	0.364	0.248	0.409	0.755	-0.954	-0.092	-5.787	1.342	1.069
-0.1464	-0.728896	-0.940896	0.385214	-0.0299741	-0.368441	0.273859	-0.169455	0.0521573	0.798174	-1.65835	0.106092	0.981814	-0.899431	0.888093	-0.827542	-0.460583	0.178902	0.187775	-0.447214	0.112753	-1.61016	2.05108	-0.41259	0.501892	0.00724574	0.167337	0.13887	-1.01434	1.89721	-0.279728	-5.53177	1.60746	1.07516				-0.6588	0.703	-0.142	1.02	0.338	0.201	0.403	0.745	-0.966	-0.071	-5.821	1.32	1.101
-0.122	-0.665673	-0.954953	0.355706	-0.050922	-0.408374	0.270631	-0.181749	0.0643744	0.751518	-1.54583	0.102433	0.991721	-0.907948	0.900803	-0.809559	-0.451989	0.165882	0.213659	-0.462343	0.0733169	-1.54775	1.89473	-0.424575	0.473833	-0.0282023	0.177252	0.0812302	-1.01029	1.88709	-0.253575	-5.2478	1.55657	1.52347				-0.6344	0.7	-0.115	1.037	0.31	0.143	0.4	0.718	-0.949	-0.059	-5.87	1.293	1.153
-0.0976	-0.606447	-0.954059	0.319095	-0.0776231	-0.443455	0.268776	-0.183454	0.0569623	0.704667	-1.46416	0.100981	1.00241	-0.914375	0.907229	-0.763399	-0.442644	0.142594	0.227715	-0.492806	0.017837	-1.44167	1.7839	-0.43083	0.443432	-0.0603164	0.187965	0.0297145	-0.992449	1.82729	-0.230503	-4.8261	1.49898	1.89911				-0.61	0.699	-0.087	1.066	0.281	0.079	0.397	0.673	-0.907	-0.06	-5.933	1.261	1.219
-0.0732	-0.56058	-0.940204	0.28009	-0.106582	-0.47368	0.271554	-0.176277	0.0372736	0.659126	-1.40882	0.102309	1.01429	-0.912759	0.904761	-0.686462	-0.432966	0.113939	0.225996	-0.539041	-0.0520928	-1.28812	1.74358	-0.428796	0.409594	-0.0863522	0.197325	-0.0124197	-0.964208	1.72094	-0.208112	-4.29687	1.43663	2.21078				-0.5856	0.695	-0.062	1.106	0.247	0.011	0.394	0.608	-0.847	-0.077	-6.006	1.226	1.291
-0.0488	-0.536301	-0.917319	0.242514	-0.132123	-0.499449	0.281026	-0.161293	0.0169474	0.616153	-1.37832	0.105448	1.02494	-0.897241	0.892724	-0.584389	-0.424715	0.0859896	0.208302	-0.600633	-0.132652	-1.09175	1.8196	-0.418535	0.372845	-0.101521	0.203483	-0.0465611	-0.932219	1.58332	-0.191718	-3.69213	1.37142	2.49777				-0.5612	0.686	-0.046	1.151	0.211	-0.059	0.391	0.525	-0.782	-0.107	-6.081	1.193	1.363
-0.0244	-0.538297	-0.889414	0.207963	-0.148658	-0.521757	0.297877	-0.139117	0.00483118	0.575599	-1.37491	0.108149	1.02807	-0.864611	0.872747	-0.468592	-0.419583	0.0640188	0.176386	-0.67458	-0.217901	-0.866281	2.07044	-0.401486	0.335118	-0.102986	0.202776	-0.0765822	-0.902978	1.43236	-0.189081	-3.0421	1.30406	2.79951				-0.5368	0.671	-0.041	1.194	0.178	-0.122	0.39	0.424	-0.725	-0.149	-6.153	1.165	1.437
0	-0.565374	-0.85942	0.176196	-0.152505	-0.542688	0.320187	-0.11092	0.00347217	0.535784	-1.40028	0.108553	1.01953	-0.815681	0.847856	-0.351894	-0.417788	0.0505392	0.132093	-0.759156	-0.300379	-0.631678	2.52746	-0.378558	0.298129	-0.0938672	0.191907	-0.104429	-0.881224	1.28361	-0.202724	-2.37269	1.23329	3.14427				-0.5124	0.65	-0.049	1.225	0.155	-0.173	0.394	0.31	-0.685	-0.199	-6.218	1.149	1.51
0.0244	-0.610717	-0.830356	0.146918	-0.143981	-0.565515	0.343909	-0.0795208	0.011149	0.494814	-1.45128	0.10652	1.00189	-0.754202	0.820834	-0.245763	-0.418887	0.0452782	0.0768043	-0.857426	-0.373744	-0.409309	3.17001	-0.349741	0.262508	-0.0821069	0.172803	-0.128204	-0.869767	1.14775	-0.230042	-1.70569	1.15714	3.54996				-0.488	0.619	-0.07	1.239	0.148	-0.21	0.405	0.188	-0.664	-0.259	-6.27	1.143	1.576
0.0488	-0.664672	-0.806618	0.120352	-0.127174	-0.592111	0.36507	-0.0484992	0.0233328	0.453631	-1.51961	0.103761	0.983204	-0.684597	0.792812	-0.15857	-0.422381	0.0481503	0.0124775	-0.973482	-0.432617	-0.217327	3.94396	-0.315821	0.227812	-0.076639	0.153452	-0.144947	-0.870244	1.02762	-0.265973	-1.06339	1.07617	4.00653				-0.4636	0.578	-0.105	1.229	0.158	-0.239	0.423	0.064	-0.657	-0.328	-6.303	1.143	1.63
0.0732	-0.717259	-0.792744	0.0963257	-0.106282	-0.619077	0.38225	-0.0201992	0.0334091	0.417154	-1.59742	0.102128	0.972001	-0.610997	0.763065	-0.0939887	-0.427466	0.0614363	-0.0571395	-1.10702	-0.469835	-0.0678075	4.79223	-0.279622	0.192978	-0.0848977	0.142691	-0.154668	-0.884002	0.921653	-0.304356	-0.469737	0.994698	4.47562				-0.4392	0.525	-0.15	1.193	0.186	-0.267	0.449	-0.054	-0.656	-0.403	-6.317	1.145	1.676
0.0976	-0.759829	-0.790832	0.0740638	-0.0823587	-0.638829	0.396968	0.00522957	0.0367155	0.391059	-1.68208	0.101428	0.973094	-0.537282	0.729909	-0.0513813	-0.433687	0.0880994	-0.127292	-1.25193	-0.47743	0.0346864	5.67098	-0.244748	0.157142	-0.11155	0.143062	-0.161783	-0.911961	0.829072	-0.33911	0.055282	0.919188	4.92371				-0.4148	0.464	-0.204	1.131	0.226	-0.296	0.482	-0.16	-0.655	-0.48	-6.316	1.145	1.726
0.122	-0.787033	-0.799614	0.0531942	-0.0531491	-0.64504	0.411762	0.0294596	0.0331232	0.377277	-1.77243	0.0996072	0.986681	-0.466239	0.6915	-0.0270889	-0.441494	0.129142	-0.194729	-1.39757	-0.451401	0.0940057	6.54827	-0.212798	0.119788	-0.15763	0.147722	-0.1734	-0.953699	0.746378	-0.365689	0.503075	0.857237	5.33513				-0.3904	0.403	-0.263	1.05	0.27	-0.327	0.519	-0.248	-0.65	-0.551	-6.319	1.146	1.795
0.1464	-0.797689	-0.816252	0.03448	-0.015066	-0.634698	0.427431	0.0555382	0.0238818	0.372623	-1.8646	0.0948088	1.0089	-0.398327	0.645904	-0.0156478	-0.450821	0.182369	-0.2594	-1.53196	-0.394536	0.120474	7.39064	-0.181938	0.0796399	-0.220908	0.144717	-0.195461	-1.00643	0.666353	-0.381605	0.881393	0.816685	5.69888				-0.366	0.345	-0.325	0.957	0.311	-0.356	0.56	-0.316	-0.639	-0.609	-6.347	1.153	1.891
0.1708	-0.792982	-0.83825	0.0191649	0.0346122	-0.605818	0.441196	0.0873658	0.00940908	0.371331	-1.95463	0.0867172	1.03324	-0.332477	0.591017	-0.0124835	-0.460107	0.241625	-0.323679	-1.64591	-0.316188	0.125902	8.16058	-0.149223	0.0342273	-0.296432	0.124738	-0.229058	-1.06465	0.58475	-0.383921	1.20913	0.802519	6.00521				-0.3416	0.294	-0.387	0.864	0.343	-0.385	0.604	-0.359	-0.619	-0.646	-6.415	1.167	2.011
0.1952	-0.77477	-0.863244	0.00753594	0.0955274	-0.556571	0.448029	0.1279	-0.00851823	0.367636	-2.04099	0.0768492	1.05307	-0.268715	0.525157	-0.0159274	-0.467589	0.298256	-0.389509	-1.73415	-0.230449	0.120242	8.82626	-0.114926	-0.0181658	-0.375873	0.0849455	-0.270106	-1.12146	0.501855	-0.369037	1.50226	0.81418	6.25214				-0.3172	0.251	-0.447	0.78	0.362	-0.413	0.65	-0.377	-0.593	-0.663	-6.517	1.185	2.151
0.2196	-0.74659	-0.888372	-0.00179103	0.162786	-0.487523	0.444155	0.176583	-0.025246	0.356545	-2.12247	0.0680397	1.06365	-0.209115	0.448211	-0.026103	-0.47106	0.345459	-0.455744	-1.79327	-0.150985	0.11101	9.36052	-0.0842785	-0.0760735	-0.448266	0.0286802	-0.312547	-1.17116	0.420505	-0.33677	1.76459	0.846799	6.44504				-0.2928	0.212	-0.502	0.712	0.372	-0.445	0.698	-0.371	-0.557	-0.66	-6.623	1.205	2.294
0.244	-0.714667	-0.911318	-0.0106295	0.228675	-0.404628	0.429155	0.228782	-0.0361701	0.334334	-2.19596	0.0633546	1.06326	-0.156151	0.362386	-0.0419736	-0.465234	0.380783	-0.518323	-1.82038	-0.08436	0.102621	9.73882	-0.0650888	-0.134938	-0.504519	-0.0357219	-0.351915	-1.21141	0.346345	-0.291465	1.98872	0.894207	6.58703				-0.2684	0.175	-0.548	0.665	0.378	-0.483	0.748	-0.34	-0.508	-0.643	-6.706	1.226	2.425
0.2684	-0.685941	-0.93188	-0.0190209	0.287187	-0.319261	0.405665	0.279033	-0.0413612	0.298861	-2.25576	0.065559	1.05469	-0.1112	0.271634	-0.0594462	-0.44206	0.404115	-0.57331	-1.81453	-0.0284544	0.0968231	9.95889	-0.0635405	-0.190639	-0.542066	-0.0986115	-0.386633	-1.2441	0.285597	-0.241073	2.16463	0.950421	6.66886				-0.244	0.135	-0.585	0.64	0.389	-0.532	0.799	-0.288	-0.445	-0.616	-6.745	1.247	2.528
0.2928	-0.665164	-0.952146	-0.0248294	0.336373	-0.243001	0.377346	0.32478	-0.0452253	0.250323	-2.29402	0.0770124	1.04478	-0.07491	0.180079	-0.0732008	-0.395384	0.414876	-0.61987	-1.77866	0.0226727	0.096226	10.0642	-0.0812231	-0.243208	-0.564902	-0.153023	-0.416318	-1.27478	0.241653	-0.195404	2.29148	1.01019	6.66522				-0.2196	0.087	-0.613	0.633	0.413	-0.597	0.848	-0.221	-0.369	-0.583	-6.737	1.266	2.6
0.3172	-0.65407	-0.975547	-0.0255282	0.376395	-0.182125	0.346293	0.365343	-0.0523033	0.19221	-2.30072	0.098715	1.03972	-0.0489585	0.0906977	-0.0807711	-0.325076	0.412509	-0.660647	-1.72002	0.0737161	0.107078	10.134	-0.115226	-0.295246	-0.579616	-0.194621	-0.439612	-1.30971	0.213038	-0.161212	2.38213	1.06937	6.54666				-0.1952	0.031	-0.633	0.639	0.456	-0.678	0.891	-0.145	-0.284	-0.553	-6.682	1.28	2.65
0.3416	-0.652138	-1.00584	-0.0198597	0.407293	-0.137527	0.312531	0.398217	-0.0656963	0.130394	-2.26583	0.128598	1.04085	-0.0374245	0.00529972	-0.0843369	-0.237142	0.398588	-0.699591	-1.64929	0.126332	0.137483	10.2446	-0.160732	-0.347363	-0.591343	-0.22072	-0.454833	-1.3506	0.194214	-0.140853	2.45402	1.12396	6.30566				-0.1708	-0.033	-0.646	0.652	0.518	-0.771	0.925	-0.069	-0.192	-0.53	-6.589	1.29	2.685
0.366	-0.657335	-1.04528	-0.0075417	0.428365	-0.107887	0.276137	0.419364	-0.088018	0.0721314	-2.18756	0.161212	1.04615	-0.0457747	-0.0746653	-0.0885254	-0.141435	0.376615	-0.738854	-1.57896	0.178679	0.193064	10.4381	-0.213639	-0.397156	-0.602303	-0.230789	-0.46178	-1.39159	0.18159	-0.134899	2.51623	1.16952	5.97199				-0.1464	-0.102	-0.65	0.671	0.594	-0.869	0.945	-0.003	-0.095	-0.515	-6.472	1.298	2.712
0.3904	-0.667217	-1.09234	0.0119269	0.438924	-0.091976	0.238547	0.426898	-0.121025	0.0263077	-2.07693	0.189798	1.05426	-0.0779023	-0.147745	-0.0962028	-0.0495536	0.349721	-0.776693	-1.52038	0.227367	0.27391	10.7141	-0.270989	-0.440659	-0.612624	-0.227889	-0.461399	-1.42247	0.17702	-0.141105	2.56593	1.20274	5.60068				-0.122	-0.171	-0.641	0.695	0.679	-0.962	0.952	0.049	0.006	-0.501	-6.349	1.31	2.733
0.4148	-0.680078	-1.14189	0.0392292	0.440748	-0.0887814	0.201293	0.423125	-0.163015	0.000759243	-1.95171	0.20865	1.06526	-0.133726	-0.212727	-0.106113	0.0280577	0.319359	-0.808261	-1.47949	0.271463	0.374299	11.0414	-0.329203	-0.473994	-0.620595	-0.220691	-0.454374	-1.43578	0.183879	-0.152607	2.59475	1.22261	5.24822				-0.0976	-0.234	-0.619	0.721	0.764	-1.043	0.944	0.083	0.109	-0.484	-6.236	1.332	2.747
0.4392	-0.694721	-1.18767	0.0739487	0.438682	-0.0954213	0.165083	0.414109	-0.208677	-0.00274175	-1.82982	0.214269	1.07819	-0.209025	-0.268787	-0.114537	0.0859157	0.286027	-0.828989	-1.45396	0.31302	0.484627	11.3724	-0.382944	-0.496184	-0.621502	-0.219498	-0.44089	-1.4312	0.204116	-0.161715	2.59861	1.2301	4.95656				-0.0732	-0.287	-0.586	0.748	0.84	-1.105	0.923	0.097	0.213	-0.457	-6.145	1.365	2.751
0.4636	-0.709677	-1.22472	0.11341	0.437488	-0.105615	0.131637	0.407614	-0.252757	0.0106379	-1.72577	0.205217	1.09102	-0.297116	-0.315641	-0.118195	0.124602	0.250119	-0.837453	-1.43537	0.354115	0.593562	11.6543	-0.427058	-0.510385	-0.608715	-0.225781	-0.421648	-1.41541	0.240929	-0.165482	2.58299	1.22832	4.74344				-0.0488	-0.326	-0.547	0.77	0.906	-1.147	0.892	0.088	0.316	-0.419	-6.086	1.412	2.741
0.488	-0.723206	-1.25011	0.153073	0.439089	-0.11186	0.105785	0.410097	-0.290699	0.0321458	-1.64578	0.180809	1.10369	-0.390554	-0.353865	-0.115651	0.14794	0.212506	-0.83551	-1.41499	0.395123	0.689507	11.8378	-0.459818	-0.521103	-0.577689	-0.230072	-0.399208	-1.39789	0.300734	-0.164272	2.5585	1.222	4.60163				-0.0244	-0.349	-0.505	0.78	0.967	-1.164	0.859	0.056	0.409	-0.371	-6.059	1.467	2.712
0.5124	-0.733886	-1.26246	0.188521	0.441935	-0.10956	0.0943883	0.425392	-0.317047	0.0537606	-1.58515	0.140613	1.11884	-0.482312	-0.384697	-0.10805	0.159767	0.175322	-0.826103	-1.38733	0.435904	0.76284	11.8822	-0.484054	-0.530412	-0.528921	-0.222292	-0.378544	-1.38456	0.387904	-0.156592	2.53505	1.21462	4.51044				0	-0.356	-0.463	0.774	1.021	-1.15	0.83	0.007	0.484	-0.317	-6.059	1.52	2.662
0.5368	-0.741193	-1.2612	0.217619	0.44176	-0.0989158	0.103179	0.455287	-0.327609	0.0725732	-1.53396	0.0858231	1.13863	-0.566942	-0.409136	-0.0990428	0.163758	0.141212	-0.810705	-1.34909	0.478274	0.808845	11.7627	-0.505257	-0.536479	-0.467143	-0.200749	-0.365965	-1.3741	0.496371	-0.140831	2.52187	1.20608	4.4454				0.0244	-0.349	-0.419	0.75	1.067	-1.102	0.809	-0.052	0.528	-0.258	-6.081	1.565	2.593
0.5612	-0.744817	-1.2466	0.241799	0.433967	-0.0829772	0.134331	0.499138	-0.321583	0.0916572	-1.48606	0.019723	1.16223	-0.640977	-0.427327	-0.0931729	0.165114	0.111689	-0.788113	-1.29665	0.525951	0.829077	11.4769	-0.528223	-0.535189	-0.396946	-0.172358	-0.36683	-1.36045	0.609434	-0.120947	2.52678	1.1937	4.3864				0.0488	-0.328	-0.371	0.71	1.101	-1.021	0.795	-0.11	0.538	-0.198	-6.122	1.599	2.511
0.5856	-0.743328	-1.22021	0.265663	0.416699	-0.0642968	0.185116	0.553139	-0.300491	0.115848	-1.44093	-0.0540393	1.18518	-0.702651	-0.438641	-0.0941401	0.170228	0.0871905	-0.755059	-1.22621	0.58156	0.82976	11.0391	-0.554408	-0.524324	-0.320191	-0.146391	-0.383453	-1.33835	0.710055	-0.106718	2.5495	1.17524	4.32285				0.0732	-0.296	-0.319	0.659	1.124	-0.912	0.787	-0.154	0.514	-0.131	-6.178	1.623	2.42
0.61	-0.734905	-1.18493	0.295056	0.393394	-0.043227	0.247835	0.61097	-0.267048	0.147576	-1.39895	-0.132022	1.19961	-0.751584	-0.441969	-0.103953	0.184072	0.0674706	-0.708789	-1.13574	0.64421	0.817443	10.4737	-0.581846	-0.506405	-0.23904	-0.126931	-0.414833	-1.307	0.78943	-0.108198	2.57585	1.15197	4.24257				0.0976	-0.257	-0.265	0.604	1.131	-0.78	0.779	-0.177	0.464	-0.053	-6.24	1.636	2.322
0.6344	-0.71942	-1.14407	0.334698	0.372151	-0.0179145	0.312048	0.665276	-0.225065	0.186318	-1.36032	-0.209379	1.19799	-0.787417	-0.436111	-0.123184	0.208174	0.0505853	-0.650575	-1.02678	0.709328	0.794706	9.814	-0.60757	-0.486405	-0.159251	-0.112347	-0.458257	-1.26972	0.845155	-0.129523	2.58277	1.12948	4.12657				0.122	-0.213	-0.209	0.554	1.12	-0.634	0.768	-0.172	0.397	0.036	-6.289	1.635	2.217
0.6588	-0.699156	-1.10077	0.386128	0.361126	0.0138963	0.36803	0.710238	-0.180443	0.23052	-1.32714	-0.279744	1.17859	-0.808575	-0.420241	-0.15144	0.240245	0.0326153	-0.587009	-0.906524	0.77066	0.760403	9.10341	-0.629576	-0.467104	-0.0892603	-0.102481	-0.510916	-1.22973	0.875932	-0.166513	2.55002	1.11387	3.97183				0.1464	-0.163	-0.155	0.516	1.083	-0.481	0.749	-0.142	0.323	0.128	-6.307	1.617	2.108
0.6832	-0.678142	-1.05788	0.446891	0.364457	0.0516744	0.40909	0.744905	-0.141026	0.28035	-1.30068	-0.337649	1.14472	-0.813539	-0.394463	-0.186412	0.275101	0.00953558	-0.52718	-0.787433	0.822255	0.715339	8.39456	-0.64613	-0.447248	-0.0360507	-0.102509	-0.570033	-1.18629	0.880441	-0.207665	2.46713	1.10674	3.80478				0.1708	-0.108	-0.11	0.494	1.015	-0.33	0.721	-0.095	0.25	0.21	-6.289	1.579	1.999
0.7076	-0.660691	-1.01799	0.5118	0.38077	0.091151	0.432493	0.774021	-0.113801	0.338716	-1.27848	-0.380442	1.09992	-0.802645	-0.360349	-0.222546	0.306445	-0.0213973	-0.477719	-0.683802	0.859055	0.666754	7.73213	-0.654213	-0.42362	-0.000713352	-0.118001	-0.631632	-1.13526	0.860303	-0.236822	2.33388	1.10421	3.65409				0.1952	-0.048	-0.078	0.487	0.915	-0.186	0.687	-0.04	0.183	0.276	-6.238	1.528	1.891
0.732	-0.649196	-0.983122	0.575466	0.402906	0.127154	0.439456	0.804791	-0.102326	0.408263	-1.25901	-0.408139	1.0465	-0.777908	-0.320943	-0.251721	0.328843	-0.0622714	-0.439511	-0.608604	0.878318	0.625964	7.13475	-0.649905	-0.394451	0.0219925	-0.148884	-0.690295	-1.07349	0.824783	-0.240477	2.1589	1.10082	3.5283				0.2196	0.009	-0.065	0.491	0.785	-0.058	0.649	0.014	0.121	0.321	-6.17	1.465	1.783
0.7564	-0.64291	-0.954374	0.633907	0.420091	0.15663	0.434316	0.842715	-0.105454	0.486866	-1.24728	-0.422435	0.987245	-0.742267	-0.279981	-0.266247	0.339549	-0.114931	-0.408124	-0.570931	0.881055	0.602768	6.60377	-0.630893	-0.361251	0.0395844	-0.189313	-0.741727	-1.00222	0.789132	-0.216737	1.95984	1.09328	3.42493				0.244	0.056	-0.072	0.501	0.631	0.046	0.611	0.06	0.058	0.347	-6.103	1.395	1.671
0.7808	-0.639044	-0.931647	0.684726	0.423418	0.178733	0.423667	0.890057	-0.118423	0.566221	-1.25105	-0.425756	0.926207	-0.699398	-0.241068	-0.262253	0.339252	-0.179945	-0.377495	-0.573797	0.871435	0.601474	6.1393	-0.598678	-0.32769	0.0576931	-0.232384	-0.785063	-0.927153	0.764905	-0.173284	1.76305	1.08031	3.33468				0.2684	0.087	-0.098	0.508	0.458	0.117	0.573	0.09	-0.014	0.354	-6.051	1.319	1.553
0.8052	-0.635281	-0.913527	0.727362	0.409439	0.193267	0.414049	0.946242	-0.136682	0.635057	-1.27314	-0.420104	0.866857	-0.653758	-0.207323	-0.240429	0.331097	-0.255402	-0.344436	-0.614936	0.855733	0.619428	5.74136	-0.558071	-0.296284	0.0790619	-0.274488	-0.820895	-0.855903	0.753904	-0.116312	1.59948	1.06078	3.23784				0.2928	0.1	-0.14	0.51	0.274	0.152	0.536	0.103	-0.1	0.346	-6.023	1.243	1.431
0.8296	-0.631966	-0.897214	0.762735	0.377895	0.199611	0.408316	1.00831	-0.158419	0.684563	-1.31114	-0.406139	0.809323	-0.610448	-0.180936	-0.203737	0.318258	-0.336727	-0.310144	-0.689147	0.841159	0.64857	5.40918	-0.514399	-0.266131	0.105332	-0.314361	-0.847048	-0.794551	0.751307	-0.0486002	1.50208	1.03421	3.11845				0.3172	0.096	-0.197	0.503	0.086	0.154	0.5	0.101	-0.197	0.326	-6.016	1.177	1.309
0.854	-0.632168	-0.879108	0.79099	0.329858	0.197293	0.405359	1.07178	-0.18473	0.71164	-1.36087	-0.383533	0.751198	-0.573565	-0.162477	-0.155561	0.301358	-0.417603	-0.277363	-0.78978	0.83403	0.679754	5.14086	-0.470836	-0.234414	0.137796	-0.349374	-0.857564	-0.745436	0.754964	0.022799	1.50225	1.00303	2.99039				0.3416	0.079	-0.264	0.487	-0.098	0.128	0.464	0.089	-0.301	0.296	-6.021	1.126	1.192
0.8784	-0.639219	-0.855916	0.809281	0.270154	0.187586	0.404387	1.13153	-0.219087	0.718212	-1.41704	-0.352902	0.691799	-0.54368	-0.150952	-0.0998413	0.279087	-0.491576	-0.246086	-0.909539	0.837957	0.707733	4.92026	-0.427299	-0.199709	0.175898	-0.375044	-0.846655	-0.706984	0.769804	0.0853068	1.61374	0.973386	2.89772				0.366	0.053	-0.337	0.463	-0.273	0.077	0.427	0.072	-0.407	0.256	-6.027	1.094	1.083
0.9028	-0.65387	-0.825052	0.812282	0.206062	0.173649	0.40808	1.18204	-0.263821	0.709347	-1.47414	-0.317364	0.633956	-0.517704	-0.14453	-0.0408234	0.252147	-0.553919	-0.211538	-1.03982	0.851829	0.732217	4.71116	-0.3813	-0.163097	0.21806	-0.387489	-0.81348	-0.675211	0.799081	0.127487	1.8204	0.953172	2.86932				0.3904	0.023	-0.409	0.431	-0.431	0.009	0.389	0.054	-0.513	0.209	-6.024	1.077	0.978
0.9272	-0.674049	-0.784686	0.794935	0.140545	0.159726	0.420351	1.21892	-0.315613	0.691298	-1.52913	-0.281925	0.58181	-0.491464	-0.140758	0.0191867	0.22526	-0.603106	-0.166595	-1.17068	0.868844	0.753447	4.47485	-0.330283	-0.126612	0.264474	-0.385226	-0.762825	-0.645924	0.835191	0.143969	2.08885	0.948601	2.88107				0.4148	-0.009	-0.478	0.393	-0.563	-0.07	0.352	0.035	-0.613	0.158	-6.007	1.071	0.87
0.9516	-0.69711	-0.734483	0.754779	0.0709571	0.151264	0.4425	1.23984	-0.366958	0.668571	-1.58157	-0.251565	0.538469	-0.462321	-0.136512	0.0817376	0.204463	-0.640971	-0.107602	-1.29349	0.879537	0.768502	4.19019	-0.273596	-0.0913222	0.316061	-0.369707	-0.702182	-0.616107	0.862445	0.135474	2.38758	0.960539	2.87538				0.4392	-0.037	-0.542	0.352	-0.662	-0.156	0.315	0.016	-0.7	0.107	-5.979	1.068	0.753
0.976	-0.721578	-0.676426	0.692731	-0.00427454	0.153268	0.472372	1.24223	-0.411595	0.642687	-1.63017	-0.229568	0.505808	-0.430284	-0.128903	0.15054	0.19305	-0.670857	-0.0380897	-1.40299	0.876287	0.772004	3.85808	-0.212863	-0.0562544	0.371239	-0.345907	-0.638669	-0.583634	0.86893	0.107336	2.69127	0.982614	2.80773				0.4636	-0.059	-0.601	0.309	-0.728	-0.248	0.28	-0.003	-0.772	0.06	-5.949	1.062	0.63
1.0004	-0.746935	-0.614507	0.613588	-0.0812382	0.166427	0.505021	1.22184	-0.447256	0.613869	-1.67073	-0.216787	0.485621	-0.397554	-0.116577	0.228349	0.190471	-0.69461	0.0340441	-1.49609	0.854962	0.75813	3.496	-0.150856	-0.0192368	0.426005	-0.321539	-0.576882	-0.546329	0.858454	0.069618	2.97694	1.00365	2.67367				0.488	-0.075	-0.655	0.262	-0.766	-0.345	0.241	-0.02	-0.836	0.015	-5.929	1.046	0.506
1.0248	-0.772584	-0.553655	0.526696	-0.153003	0.186346	0.534653	1.17601	-0.474996	0.581926	-1.6993	-0.211616	0.47933	-0.366754	-0.0998408	0.315986	0.194549	-0.711004	0.103043	-1.57002	0.814868	0.722754	3.13074	-0.0896507	0.0209969	0.476456	-0.303877	-0.517575	-0.50216	0.850124	0.0347515	3.22415	1.01385	2.49725				0.5124	-0.089	-0.706	0.206	-0.783	-0.445	0.196	-0.038	-0.9	-0.028	-5.933	1.017	0.391
1.0492	-0.79742	-0.498987	0.444551	-0.21437	0.20686	0.5593	1.10769	-0.496921	0.545602	-1.71565	-0.210698	0.486172	-0.339089	-0.0796289	0.412184	0.203581	-0.716771	0.16948	-1.62316	0.759013	0.666771	2.7828	-0.030135	0.0640065	0.520711	-0.296369	-0.45819	-0.450885	0.862214	0.0100667	3.4205	1.0097	2.29765				0.5368	-0.107	-0.754	0.142	-0.784	-0.543	0.143	-0.059	-0.972	-0.068	-5.977	0.977	0.289
1.0736	-0.820168	-0.45537	0.378214	-0.264733	0.223116	0.582899	1.02501	-0.51499	0.503525	-1.72238	-0.210828	0.50412	-0.314535	-0.0566627	0.51345	0.215677	-0.708925	0.239398	-1.65789	0.694453	0.597842	2.45615	0.0260156	0.107782	0.559448	-0.297376	-0.395964	-0.395705	0.896647	-0.00694127	3.56205	0.994041	2.07853				0.5612	-0.133	-0.801	0.069	-0.777	-0.628	0.083	-0.082	-1.053	-0.102	-6.068	0.926	0.206
1.098	-0.83954	-0.426785	0.333288	-0.307885	0.232977	0.6107	0.936883	-0.53153	0.4566	-1.72363	-0.210273	0.533803	-0.293419	-0.0316651	0.615612	0.228728	-0.68681	0.318959	-1.67992	0.631683	0.526507	2.15156	0.0741581	0.149278	0.59542	-0.301061	-0.331545	-0.343285	0.944305	-0.0243687	3.6467	0.973334	1.84578				0.5856	-0.166	-0.849	-0.007	-0.764	-0.691	0.022	-0.105	-1.139	-0.128	-6.204	0.868	0.145
1.1224	-0.854563	-0.415095	0.309948	-0.349549	0.237353	0.644254	0.849016	-0.548145	0.408583	-1.72563	-0.207505	0.579505	-0.276116	-0.00613066	0.716074	0.242977	-0.65219	0.408206	-1.69262	0.581105	0.459235	1.87771	0.107526	0.186016	0.633036	-0.298799	-0.268978	-0.301757	1.00443	-0.0478531	3.67484	0.954455	1.6158				0.61	-0.204	-0.898	-0.079	-0.749	-0.726	-0.038	-0.122	-1.219	-0.141	-6.375	0.806	0.107
1.1468	-0.865747	-0.418973	0.304939	-0.394508	0.239378	0.681067	0.763474	-0.564294	0.364837	-1.73739	-0.199794	0.644977	-0.261618	0.0175554	0.813948	0.261355	-0.607764	0.499405	-1.69331	0.548412	0.395481	1.65197	0.120972	0.217216	0.675939	-0.282287	-0.211789	-0.278495	1.08697	-0.0763365	3.6558	0.942347	1.39759				0.6344	-0.242	-0.945	-0.14	-0.729	-0.734	-0.093	-0.131	-1.288	-0.14	-6.562	0.742	0.093
1.1712	-0.875564	-0.434093	0.313167	-0.444892	0.242817	0.717047	0.682147	-0.578885	0.330915	-1.76879	-0.184957	0.728286	-0.248302	0.0371814	0.908277	0.286673	-0.556795	0.581927	-1.67705	0.532966	0.331077	1.49212	0.114132	0.243438	0.722268	-0.248363	-0.159849	-0.278476	1.19398	-0.10313	3.60615	0.938449	1.17952				0.6588	-0.275	-0.99	-0.187	-0.702	-0.72	-0.138	-0.135	-1.345	-0.124	-6.746	0.676	0.102
1.1956	-0.886977	-0.454142	0.329323	-0.500319	0.25003	0.749296	0.609834	-0.59166	0.310745	-1.82498	-0.16352	0.820739	-0.235643	0.0521204	0.996508	0.31976	-0.503454	0.649339	-1.64112	0.527772	0.263681	1.38711	0.091204	0.265917	0.764553	-0.200724	-0.109875	-0.302443	1.31106	-0.12046	3.54334	0.940335	0.94842				0.6832	-0.301	-1.027	-0.218	-0.666	-0.692	-0.173	-0.139	-1.395	-0.094	-6.914	0.607	0.129
1.22	-0.900954	-0.472722	0.349409	-0.559093	0.26004	0.777783	0.552536	-0.603896	0.304892	-1.90148	-0.137118	0.909519	-0.224499	0.0636429	1.07441	0.359636	-0.452583	0.702462	-1.58442	0.520745	0.195469	1.29361	0.057921	0.286415	0.796711	-0.147241	-0.0582899	-0.346684	1.4195	-0.124662	3.48187	0.943413	0.716579				0.7076	-0.321	-1.057	-0.236	-0.623	-0.656	-0.195	-0.149	-1.442	-0.051	-7.063	0.534	0.165
1.2444	-0.915507	-0.486097	0.371706	-0.618942	0.268491	0.804807	0.513394	-0.619831	0.310131	-1.98513	-0.105816	0.980205	-0.216863	0.0737622	1.13728	0.404671	-0.409943	0.746889	-1.50657	0.50041	0.132575	1.17918	0.0189331	0.306954	0.819792	-0.0961242	-0.00365072	-0.405061	1.50829	-0.11884	3.4283	0.94292	0.522706				0.732	-0.335	-1.078	-0.242	-0.58	-0.618	-0.205	-0.169	-1.486	0.001	-7.197	0.46	0.195
1.2688	-0.927768	-0.493798	0.397229	-0.67678	0.270173	0.832671	0.491432	-0.644496	0.32094	-2.05834	-0.0689557	1.02066	-0.215534	0.0838074	1.18125	0.452629	-0.381153	0.788439	-1.41114	0.46357	0.082536	1.0349	-0.022319	0.328746	0.839693	-0.0516275	0.0530726	-0.469957	1.57623	-0.110078	3.37863	0.935148	0.403176				0.7564	-0.349	-1.092	-0.236	-0.544	-0.584	-0.206	-0.2	-1.527	0.054	-7.32	0.389	0.207
1.2932	-0.936521	-0.496613	0.429291	-0.727567	0.26205	0.861742	0.483112	-0.679879	0.332305	-2.10394	-0.0275509	1.02831	-0.222311	0.0941764	1.20392	0.499533	-0.368091	0.830102	-1.30694	0.418513	0.049917	0.847138	-0.0624832	0.351595	0.860771	-0.0118719	0.109604	-0.531898	1.63252	-0.103338	3.32586	0.919335	0.356663				0.7808	-0.365	-1.099	-0.219	-0.515	-0.557	-0.201	-0.245	-1.564	0.101	-7.43	0.328	0.197
1.3176	-0.942106	-0.495163	0.471714	-0.764061	0.244137	0.891096	0.483675	-0.725514	0.340786	-2.10982	0.0157665	1.01346	-0.235137	0.105227	1.20472	0.540601	-0.367584	0.871757	-1.2031	0.379088	0.0322195	0.603881	-0.097839	0.374531	0.882942	0.0269196	0.163819	-0.581382	1.69264	-0.0990906	3.26889	0.899553	0.343696				0.8052	-0.389	-1.103	-0.189	-0.494	-0.534	-0.195	-0.304	-1.593	0.138	-7.525	0.281	0.165
1.342	-0.944869	-0.490146	0.526592	-0.780445	0.218253	0.92007	0.487548	-0.780782	0.342926	-2.07355	0.0586733	0.991811	-0.248083	0.117845	1.18481	0.572311	-0.373818	0.912266	-1.10558	0.353416	0.0196954	0.327068	-0.124999	0.396785	0.903989	0.0656865	0.214586	-0.612624	1.76387	-0.0956179	3.21387	0.883376	0.327412				0.8296	-0.421	-1.104	-0.144	-0.482	-0.514	-0.192	-0.376	-1.609	0.169	-7.601	0.248	0.113
1.3664	-0.944711	-0.483204	0.592579	-0.776733	0.186727	0.947807	0.48958	-0.844398	0.335428	-2.00526	0.101228	0.974244	-0.255132	0.133098	1.14692	0.591905	-0.380259	0.952389	-1.01974	0.340261	-0.000667424	0.0676278	-0.142245	0.418575	0.922064	0.104782	0.261326	-0.625687	1.83964	-0.092559	3.1704	0.876967	0.304673				0.854	-0.461	-1.107	-0.081	-0.481	-0.491	-0.195	-0.46	-1.609	0.202	-7.65	0.226	0.048
1.3908	-0.941611	-0.477071	0.663914	-0.758095	0.151199	0.972011	0.48721	-0.913254	0.318003	-1.92319	0.145571	0.964613	-0.252934	0.151768	1.09547	0.596594	-0.380702	0.995871	-0.952822	0.335552	-0.0397643	-0.128432	-0.150439	0.441006	0.934929	0.147757	0.303772	-0.625888	1.91104	-0.0936925	3.14492	0.881538	0.297189				0.8784	-0.507	-1.113	0	-0.492	-0.465	-0.204	-0.551	-1.592	0.24	-7.659	0.216	-0.018
1.4152	-0.936153	-0.474325	0.731334	-0.732139	0.111354	0.989399	0.480688	-0.983376	0.293496	-1.84428	0.19225	0.963577	-0.240232	0.174162	1.03602	0.585748	-0.370697	1.04698	-0.91217	0.336636	-0.1023	-0.238953	-0.152585	0.464315	0.938885	0.199887	0.342057	-0.620775	1.97431	-0.105023	3.13643	0.893644	0.330966				0.9028	-0.556	-1.121	0.092	-0.514	-0.439	-0.218	-0.643	-1.558	0.286	-7.613	0.22	-0.064
1.4396	-0.930035	-0.475709	0.785352	-0.707205	0.0657693	0.997323	0.470852	-1.05154	0.264823	-1.77924	0.23831	0.970184	-0.217089	0.199846	0.973607	0.56344	-0.348385	1.10639	-0.901571	0.339865	-0.186139	-0.260668	-0.152018	0.486557	0.930166	0.263619	0.375491	-0.616101	2.02723	-0.127408	3.14011	0.906846	0.421541				0.9272	-0.606	-1.127	0.185	-0.537	-0.414	-0.234	-0.73	-1.508	0.345	-7.498	0.245	-0.068
1.464	-0.925704	-0.47997	0.819796	-0.689189	0.0146902	0.994951	0.457541	-1.11512	0.233719	-1.73256	0.279143	0.979265	-0.185097	0.227258	0.911588	0.53762	-0.314829	1.16903	-0.918269	0.338648	-0.28526	-0.197389	-0.150251	0.505628	0.908542	0.335063	0.401449	-0.614201	2.06572	-0.15322	3.15615	0.91418	0.562803				0.9516	-0.648	-1.124	0.269	-0.55	-0.394	-0.242	-0.806	-1.448	0.425	-7.308	0.293	-0.01
1.4884	-0.92465	-0.485803	0.832977	-0.679119	-0.03928	0.983561	0.440481	-1.17006	0.20201	-1.70446	0.310217	0.980636	-0.146303	0.254037	0.852126	0.515809	-0.274146	1.22585	-0.952635	0.326805	-0.393153	-0.0605954	-0.146331	0.522611	0.879615	0.40512	0.416797	-0.615606	2.08474	-0.17228	3.19167	0.911595	0.736949				0.976	-0.673	-1.103	0.341	-0.541	-0.376	-0.232	-0.862	-1.382	0.538	-7.05	0.365	0.124
																																					1.0004	-0.671	-1.052	0.401	-0.499	-0.357	-0.196	-0.895	-1.313	0.703	-6.74	0.464	0.339
																																					1.0248	-0.626	-0.959	0.454	-0.413	-0.325	-0.128	-0.896	-1.234	0.943	-6.399	0.591	0.636
																																					1.0492	-0.52	-0.816	0.505	-0.273	-0.259	-0.022	-0.858	-1.126	1.277	-6.044	0.75	1.008
																																					1.0736	-0.334	-0.623	0.561	-0.073	-0.127	0.126	-0.769	-0.96	1.719	-5.694	0.945	1.436
																																					1.098	-0.048	-0.387	0.63	0.19	0.102	0.315	-0.62	-0.707	2.271	-5.36	1.18	1.896
																																					1.1224	0.351	-0.124	0.72	0.516	0.456	0.541	-0.403	-0.35	2.921	-5.051	1.455	2.365
																																					1.1468	0.86	0.151	0.834	0.9	0.951	0.795	-0.117	0.119	3.646	-4.771	1.767	2.816
																																					1.1712	1.463	0.422	0.972	1.328	1.581	1.065	0.229	0.684	4.405	-4.519	2.101	3.22
																																					1.1956	2.131	0.682	1.131	1.774	2.324	1.339	0.62	1.313	5.155	-4.289	2.441	3.551
																																					1.22	2.824	0.924	1.306	2.206	3.142	1.605	1.033	1.957	5.854	-4.075	2.767	3.796
																																					1.2444	3.503	1.149	1.488	2.592	3.987	1.856	1.443	2.57	6.473	-3.871	3.068	3.96
																																					1.2688	4.137	1.358	1.672	2.91	4.808	2.091	1.827	3.113	6.995	-3.676	3.336	4.057
																																					1.2932	4.701	1.555	1.852	3.148	5.562	2.314	2.168	3.56	7.415	-3.492	3.568	4.107
																																					1.3176	5.182	1.744	2.021	3.307	6.217	2.529	2.457	3.9	7.743	-3.322	3.767	4.126
																																					1.342	5.577	1.928	2.175	3.401	6.758	2.743	2.691	4.14	7.994	-3.167	3.943	4.127
																																					1.3664	5.891	2.11	2.312	3.446	7.184	2.957	2.874	4.287	8.177	-3.021	4.108	4.113
																																					1.3908	6.131	2.29	2.431	3.466	7.505	3.169	3.013	4.352	8.296	-2.879	4.269	4.079
																																					1.4152	6.304	2.464	2.535	3.483	7.736	3.378	3.119	4.339	8.349	-2.734	4.429	4.015
																																					1.4396	6.416	2.632	2.63	3.508	7.897	3.582	3.202	4.255	8.337	-2.591	4.586	3.919
																																					1.464	6.471	2.793	2.722	3.545	8.009	3.78	3.27	4.107	8.264	-2.455	4.739	3.8
																																					1.4884	6.471	2.95	2.818	3.587	8.088	3.971	3.326	3.906	8.143	-2.333	4.884	3.678
																																					1.5128	6.424	3.11	2.92	3.632	8.146	4.153	3.37	3.662	7.99	-2.233	5.017	3.573
																																					1.5372	6.338	3.275	3.029	3.677	8.185	4.326	3.404	3.394	7.829	-2.159	5.135	3.496
																																					1.5616	6.227	3.45	3.143	3.711	8.208	4.492	3.426	3.124	7.683	-2.11	5.241	3.443
																																					1.586	6.101	3.638	3.259	3.725	8.214	4.651	3.439	2.881	7.573	-2.081	5.339	3.401
																																					1.6104	5.974	3.839	3.37	3.713	8.203	4.803	3.444	2.687	7.514	-2.065	5.435	3.357
																																					1.6348	5.858	4.052	3.473	3.674	8.172	4.95	3.443	2.552	7.507	-2.061	5.536	3.302
																																					1.6592	5.762	4.274	3.563	3.618	8.122	5.089	3.44	2.469	7.549	-2.069	5.643	3.234
																																					1.6836	5.689	4.502	3.637	3.555	8.059	5.223	3.44	2.421	7.632	-2.087	5.758	3.15
																																					1.708	5.639	4.736	3.694	3.492	7.99	5.354	3.448	2.392	7.746	-2.108	5.881	3.056
																																					1.7324	5.607	4.975	3.739	3.434	7.925	5.484	3.462	2.367	7.885	-2.122	6.011	2.959
																																					1.7568	5.592	5.218	3.776	3.38	7.879	5.616	3.481	2.341	8.041	-2.12	6.148	2.865
																																					1.7812	5.593	5.468	3.808	3.334	7.864	5.754	3.501	2.308	8.208	-2.105	6.284	2.779
																																					1.8056	5.61	5.726	3.837	3.294	7.882	5.899	3.52	2.27	8.377	-2.084	6.413	2.706
																																					1.83	5.647	5.99	3.861	3.256	7.931	6.048	3.534	2.232	8.547	-2.068	6.531	2.65
																																					1.8544	5.705	6.262	3.875	3.218	7.996	6.199	3.539	2.2	8.72	-2.058	6.636	2.604
																																					1.8788	5.785	6.542	3.879	3.177	8.065	6.346	3.53	2.174	8.897	-2.053	6.72	2.557
																																					1.9032	5.887	6.83	3.873	3.138	8.13	6.487	3.508	2.147	9.084	-2.053	6.777	2.504
																																					1.9276	6.008	7.127	3.858	3.109	8.19	6.622	3.474	2.118	9.281	-2.063	6.799	2.45
																																					1.952	6.143	7.429	3.838	3.087	8.248	6.754	3.436	2.089	9.494	-2.09	6.789	2.407
																																					1.9764	6.287	7.732	3.817	3.067	8.309	6.887	3.401	2.063	9.723	-2.133	6.749	2.388
																																					2.0008	6.432	8.033	3.796	3.033	8.374	7.025	3.373	2.047	9.969	-2.189	6.686	2.401
																																					2.0252	6.57	8.327	3.781	2.975	8.445	7.167	3.354	2.043	10.233	-2.254	6.606	2.447
																																					2.0496	6.695	8.613	3.773	2.887	8.523	7.314	3.339	2.049	10.517	-2.326	6.515	2.518
																																					2.074	6.806	8.884	3.776	2.766	8.614	7.466	3.329	2.054	10.823	-2.404	6.417	2.601
																																					2.0984	6.906	9.139	3.791	2.619	8.718	7.626	3.322	2.047	11.153	-2.486	6.32	2.679
																																					2.1228	7.001	9.375	3.819	2.451	8.834	7.794	3.322	2.023	11.503	-2.565	6.23	2.736
																																					2.1472	7.101	9.589	3.859	2.276	8.956	7.969	3.331	1.988	11.862	-2.637	6.153	2.759
																																					2.1716	7.213	9.782	3.904	2.108	9.086	8.151	3.351	1.947	12.216	-2.697	6.095	2.748
																																					2.196	7.34	9.954	3.946	1.958	9.228	8.337	3.384	1.903	12.554	-2.742	6.057	2.714
																																					2.2204	7.481	10.105	3.98	1.836	9.384	8.526	3.43	1.855	12.87	-2.772	6.039	2.67
																																					2.2448	7.634	10.234	4.002	1.747	9.555	8.714	3.487	1.799	13.166	-2.791	6.041	2.633
																																					2.2692	7.799	10.337	4.013	1.691	9.741	8.898	3.556	1.733	13.449	-2.804	6.059	2.612
																																					2.2936	7.976	10.41	4.019	1.662	9.94	9.076	3.63	1.663	13.726	-2.81	6.089	2.611
																																					2.318	8.166	10.453	4.029	1.653	10.152	9.245	3.705	1.594	14	-2.804	6.127	2.624
																																					2.3424	8.368	10.465	4.05	1.658	10.377	9.403	3.778	1.53	14.274	-2.777	6.169	2.636
																																					2.3668	8.577	10.448	4.084	1.668	10.616	9.546	3.846	1.476	14.551	-2.72	6.21	2.631
																																					2.3912	8.79	10.405	4.135	1.677	10.864	9.673	3.91	1.436	14.831	-2.625	6.251	2.598
																							0.0243902														2.4156	8.999	10.343	4.203	1.675	11.115	9.78	3.971	1.407	15.115	-2.492	6.293	2.54
																																					2.44	9.199	10.266	4.282	1.653	11.364	9.861	4.03	1.385	15.401	-2.334	6.337	2.465
																																					2.4644	9.385	10.178	4.363	1.604	11.608	9.914	4.087	1.369	15.683	-2.172	6.38	2.38
																																					2.4888	9.555	10.084	4.439	1.53	11.849	9.939	4.143	1.355	15.948	-2.027	6.422	2.29
																																					2.5132	9.706	9.985	4.507	1.436	12.082	9.938	4.204	1.342	16.179	-1.914	6.464	2.196
																																					2.5376	9.837	9.886	4.565	1.328	12.304	9.916	4.274	1.328	16.36	-1.838	6.507	2.101
																																					2.562	9.948	9.786	4.613	1.217	12.512	9.875	4.355	1.314	16.477	-1.8	6.548	2.007
																																					2.5864	10.04	9.684	4.651	1.109	12.7	9.818	4.445	1.298	16.524	-1.798	6.582	1.914
																																					2.6108	10.113	9.581	4.676	1.009	12.865	9.748	4.542	1.278	16.5	-1.828	6.602	1.818
																																					2.6352	10.166	9.478	4.688	0.918	13.004	9.665	4.64	1.253	16.411	-1.882	6.606	1.721
																																					2.6596	10.203	9.378	4.69	0.836	13.113	9.568	4.735	1.224	16.273	-1.949	6.6	1.632
																																					2.684	10.227	9.282	4.685	0.767	13.194	9.459	4.825	1.194	16.104	-2.017	6.59	1.556
																																					2.7084	10.24	9.192	4.68	0.72	13.248	9.34	4.911	1.162	15.913	-2.078	6.586	1.491
																																					2.7328	10.242	9.107	4.678	0.702	13.278	9.214	4.992	1.128	15.705	-2.128	6.593	1.432
																																					2.7572	10.233	9.024	4.687	0.721	13.289	9.086	5.071	1.092	15.475	-2.167	6.61	1.372
																																					2.7816	10.213	8.939	4.713	0.774	13.284	8.959	5.145	1.056	15.221	-2.192	6.628	1.311
																																					2.806	10.179	8.85	4.764	0.854	13.268	8.833	5.213	1.029	14.944	-2.206	6.636	1.25
																																					2.8304	10.132	8.757	4.841	0.946	13.238	8.71	5.272	1.017	14.65	-2.213	6.624	1.193
																																					2.8548	10.069	8.66	4.938	1.036	13.193	8.589	5.32	1.015	14.348	-2.218	6.585	1.145
																																					2.8792	9.988	8.559	5.042	1.114	13.129	8.466	5.352	1.019	14.045	-2.223	6.517	1.106
																																					2.9036	9.888	8.455	5.135	1.179	13.045	8.342	5.363	1.023	13.743	-2.227	6.425	1.067
																																					2.928	9.769	8.349	5.202	1.229	12.944	8.218	5.349	1.024	13.446	-2.226	6.318	1.016
																																					2.9524	9.635	8.239	5.236	1.268	12.828	8.096	5.312	1.025	13.158	-2.219	6.2	0.946
																																					2.9768	9.489	8.122	5.232	1.3	12.698	7.98	5.254	1.032	12.879	-2.212	6.078	0.851
																																					3.0012	9.334	7.996	5.195	1.327	12.556	7.87	5.183	1.044	12.609	-2.213	5.959	0.729
																																					3.0256	9.175	7.863	5.13	1.353	12.403	7.768	5.108	1.062	12.347	-2.227	5.852	0.582
																																					3.05	9.017	7.723	5.045	1.376	12.239	7.674	5.038	1.082	12.09	-2.248	5.764	0.419
																																					3.0744	8.862	7.581	4.953	1.396	12.065	7.582	4.985	1.103	11.835	-2.262	5.699	0.258
																																					3.0988	8.713	7.439	4.867	1.409	11.884	7.49	4.953	1.127	11.577	-2.256	5.655	0.114
																																					3.1232	8.569	7.299	4.795	1.414	11.696	7.391	4.941	1.158	11.314	-2.222	5.629	-0.002
																																					3.1476	8.433	7.161	4.734	1.409	11.504	7.285	4.941	1.203	11.047	-2.16	5.614	-0.088
																																					3.172	8.303	7.028	4.679	1.396	11.312	7.176	4.944	1.26	10.779	-2.073	5.603	-0.144
																																					3.1964	8.178	6.9	4.623	1.382	11.124	7.069	4.94	1.319	10.516	-1.961	5.588	-0.172
																																					3.2208	8.056	6.781	4.564	1.367	10.944	6.966	4.921	1.365	10.26	-1.818	5.563	-0.172
																																					3.2452	7.932	6.672	4.504	1.353	10.773	6.87	4.887	1.386	10.014	-1.646	5.521	-0.149
																																					3.2696	7.802	6.574	4.446	1.334	10.612	6.781	4.84	1.381	9.782	-1.455	5.459	-0.107
																																					3.294	7.66	6.486	4.394	1.302	10.462	6.696	4.787	1.357	9.565	-1.256	5.375	-0.058
																																					3.3184	7.505	6.407	4.343	1.252	10.317	6.612	4.732	1.329	9.366	-1.054	5.267	-0.012
																																					3.3428	7.338	6.332	4.293	1.183	10.177	6.525	4.679	1.312	9.185	-0.853	5.14	0.022
																																					3.3672	7.164	6.256	4.238	1.099	10.039	6.433	4.627	1.317	9.027	-0.655	4.993	0.037
																																					3.3916	6.989	6.175	4.175	1.004	9.902	6.336	4.574	1.348	8.894	-0.458	4.828	0.03
																																					3.416	6.82	6.086	4.104	0.903	9.767	6.234	4.52	1.406	8.788	-0.26	4.65	0.005
																																					3.4404	6.657	5.989	4.025	0.8	9.632	6.127	4.463	1.49	8.708	-0.059	4.465	-0.02
																																					3.4648	6.501	5.885	3.942	0.701	9.498	6.017	4.403	1.59	8.65	0.146	4.28	-0.033
																																					3.4892	6.352	5.776	3.858	0.611	9.366	5.907	4.34	1.694	8.604	0.358	4.1	-0.03
																																					3.5136	6.214	5.666	3.78	0.538	9.239	5.797	4.278	1.783	8.561	0.579	3.927	-0.021
																																					3.538	6.087	5.558	3.71	0.485	9.123	5.688	4.22	1.844	8.507	0.815	3.762	-0.019
																																					3.5624	5.972	5.453	3.647	0.45	9.025	5.578	4.168	1.869	8.436	1.065	3.609	-0.033
																																					3.5868	5.867	5.351	3.59	0.431	8.947	5.47	4.122	1.855	8.34	1.321	3.473	-0.067
																																					3.6112	5.77	5.251	3.538	0.424	8.89	5.364	4.081	1.805	8.222	1.564	3.358	-0.112
																																					3.6356	5.674	5.154	3.491	0.425	8.852	5.259	4.045	1.731	8.086	1.776	3.265	-0.15
																																					3.66	5.578	5.059	3.447	0.433	8.829	5.153	4.014	1.649	7.938	1.943	3.185	-0.166
																																					3.6844	5.482	4.967	3.405	0.449	8.814	5.043	3.986	1.572	7.78	2.057	3.107	-0.152
																																					3.7088	5.386	4.879	3.36	0.471	8.802	4.929	3.96	1.506	7.613	2.117	3.016	-0.113
																																					3.7332	5.29	4.796	3.305	0.494	8.784	4.811	3.933	1.449	7.436	2.134	2.905	-0.054
																																					3.7576	5.193	4.718	3.234	0.514	8.758	4.69	3.899	1.392	7.248	2.119	2.774	0.02
																																					3.782	5.092	4.643	3.147	0.526	8.724	4.569	3.857	1.332	7.048	2.084	2.633	0.109
																																					3.8064	4.989	4.569	3.046	0.526	8.68	4.449	3.802	1.265	6.838	2.034	2.492	0.207
																																					3.8308	4.886	4.494	2.935	0.513	8.625	4.332	3.736	1.191	6.627	1.978	2.363	0.305
																																					3.8552	4.787	4.416	2.819	0.49	8.556	4.221	3.66	1.111	6.425	1.923	2.251	0.396
																																					3.8796	4.695	4.333	2.7	0.469	8.472	4.116	3.578	1.031	6.239	1.875	2.159	0.47
																																					3.904	4.614	4.243	2.581	0.461	8.373	4.021	3.495	0.959	6.072	1.838	2.086	0.523
																																					3.9284	4.544	4.147	2.463	0.477	8.256	3.936	3.416	0.897	5.923	1.807	2.026	0.553
																																					3.9528	4.485	4.043	2.349	0.519	8.12	3.859	3.344	0.844	5.786	1.778	1.976	0.565
																																					3.9772	4.433	3.936	2.242	0.585	7.967	3.789	3.282	0.794	5.661	1.744	1.935	0.569
																																					4.0016	4.383	3.828	2.146	0.667	7.804	3.724	3.231	0.748	5.551	1.7	1.905	0.574
																																					4.026	4.329	3.721	2.061	0.749	7.636	3.661	3.19	0.708	5.462	1.643	1.886	0.586
																																					4.0504	4.27	3.616	1.987	0.818	7.472	3.595	3.152	0.683	5.397	1.568	1.875	0.602
																																					4.0748	4.206	3.514	1.923	0.863	7.318	3.522	3.111	0.674	5.348	1.477	1.869	0.614
																																					4.0992	4.14	3.415	1.869	0.886	7.178	3.442	3.061	0.68	5.306	1.373	1.864	0.612
																																					4.1236	4.075	3.321	1.826	0.89	7.051	3.357	2.996	0.695	5.264	1.269	1.856	0.589
																																					4.148	4.017	3.23	1.795	0.883	6.935	3.273	2.915	0.711	5.216	1.174	1.843	0.544
																																					4.1724	3.968	3.14	1.775	0.872	6.83	3.193	2.815	0.72	5.161	1.095	1.822	0.48
																																					4.1968	3.929	3.048	1.764	0.861	6.736	3.122	2.7	0.717	5.1	1.03	1.799	0.402
																																					4.2212	3.898	2.951	1.756	0.851	6.652	3.058	2.575	0.702	5.034	0.972	1.776	0.318
																																					4.2456	3.869	2.849	1.748	0.844	6.573	3.003	2.449	0.684	4.969	0.911	1.756	0.234
																																					4.27	3.841	2.745	1.735	0.839	6.494	2.953	2.331	0.668	4.908	0.84	1.74	0.156
																																					4.2944	3.811	2.641	1.718	0.835	6.413	2.904	2.221	0.653	4.855	0.767	1.721	0.094
																																					4.3188	3.784	2.541	1.697	0.83	6.33	2.854	2.121	0.639	4.811	0.709	1.694	0.061
																																					4.3432	3.76	2.444	1.675	0.825	6.245	2.803	2.032	0.623	4.778	0.685	1.657	0.062
																																					4.3676	3.742	2.354	1.657	0.82	6.157	2.753	1.953	0.612	4.753	0.708	1.613	0.093
																																					4.392	3.728	2.269	1.642	0.814	6.067	2.707	1.882	0.611	4.733	0.786	1.567	0.136
																																					4.4164	3.717	2.19	1.624	0.804	5.978	2.663	1.819	0.624	4.716	0.914	1.525	0.17
																																					4.4408	3.701	2.114	1.598	0.792	5.894	2.62	1.764	0.649	4.699	1.08	1.492	0.183
																																					4.4652	3.678	2.04	1.562	0.778	5.815	2.574	1.722	0.677	4.684	1.268	1.465	0.171
																																					4.4896	3.642	1.968	1.516	0.763	5.741	2.522	1.693	0.698	4.673	1.456	1.443	0.136
																																					4.514	3.592	1.899	1.463	0.745	5.67	2.466	1.674	0.706	4.664	1.626	1.421	0.078
																																					4.5384	3.529	1.836	1.408	0.723	5.602	2.409	1.661	0.7	4.654	1.763	1.392	0
																																					4.5628	3.46	1.779	1.352	0.693	5.538	2.352	1.651	0.685	4.635	1.857	1.352	-0.09
																																					4.5872	3.392	1.726	1.3	0.656	5.477	2.296	1.64	0.67	4.606	1.898	1.296	-0.184
																																					4.6116	3.332	1.676	1.253	0.618	5.418	2.241	1.626	0.661	4.568	1.873	1.225	-0.274
																																					4.636	3.282	1.623	1.21	0.583	5.358	2.187	1.606	0.667	4.523	1.764	1.143	-0.357
																																					4.6604	3.24	1.569	1.167	0.559	5.297	2.134	1.58	0.687	4.475	1.557	1.056	-0.431
																																					4.6848	3.2	1.514	1.122	0.549	5.237	2.082	1.551	0.717	4.425	1.254	0.968	-0.489
																																					4.7092	3.16	1.462	1.074	0.549	5.177	2.032	1.522	0.745	4.371	0.884	0.882	-0.522
																																					4.7336	3.12	1.412	1.028	0.55	5.117	1.986	1.494	0.761	4.312	0.491	0.804	-0.526
																																					4.758	3.085	1.363	0.985	0.549	5.055	1.946	1.469	0.758	4.247	0.122	0.739	-0.507
																																					4.7824	3.059	1.315	0.947	0.545	4.995	1.91	1.449	0.735	4.178	-0.179	0.691	-0.474
																																					4.8068	3.043	1.268	0.911	0.543	4.941	1.876	1.437	0.696	4.102	-0.375	0.657	-0.44
																																					4.8312	3.034	1.221	0.876	0.544	4.899	1.839	1.431	0.647	4.021	-0.436	0.634	-0.409
																																					4.8556	3.026	1.174	0.84	0.546	4.869	1.796	1.426	0.596	3.936	-0.343	0.617	-0.386
																																					4.88	3.012	1.13	0.805	0.544	4.846	1.749	1.416	0.549	3.855	-0.098	0.603	-0.373
																																					4.9044	2.989	1.088	0.774	0.536	4.826	1.699	1.398	0.511	3.788	0.279	0.591	-0.376
																																					4.9288	2.961	1.05	0.748	0.52	4.806	1.646	1.374	0.481	3.744	0.752	0.583	-0.396
																																					4.9532	2.933	1.015	0.727	0.5	4.784	1.592	1.349	0.456	3.727	1.277	0.581	-0.426
																																					4.9776	2.91	0.982	0.713	0.479	4.761	1.539	1.324	0.436	3.729	1.811	0.588	-0.457
																																					5.002	2.898	0.949	0.705	0.459	4.741	1.491	1.303	0.418	3.742	2.311	0.603	-0.483
[truncated: 21 more columns]

## Sheet: Figure2 - supplement 4AB
Epoch	Cue	Cue	Cue	Cue	Cue	Cue		Cue	Cue	Cue	Cue	Cue	Cue					Epoch	Action+Reward	Action+Reward	Action+Reward	Action+Reward	Action+Reward	Action+Reward		Action+Reward	Action+Reward	Action+Reward	Action+Reward	Action+Reward	Action+Reward
Region	dmPFC	dmPFC	dmPFC	dmPFC	dmPFC	dmPFC		VTA	VTA	VTA	VTA	VTA	VTA					Region	dmPFC	dmPFC	dmPFC	dmPFC	dmPFC	dmPFC		VTA	VTA	VTA	VTA	VTA	VTA
Block	1	1	2	2	3	3		1	1	2	2	3	3		Block 1= 0%, Block 2=6%, block3=10%			Block	1	1	2	2	3	3		1	1	2	2	3	3		Block 1= 0%, Block 2=6%, block3=10%
Technique	Single Unit	Fib Photmetry	Single Unit	Fib Photmetry	Single Unit	Fib Photmetry		Single Unit	Fib Photmetry	Single Unit	Fib Photmetry	Single Unit	Fib Photmetry					Technique	Single Unit	Fib Photmetry	Single Unit	Fib Photmetry	Single Unit	Fib Photmetry		Single Unit	Fib Photmetry	Single Unit	Fib Photmetry	Single Unit	Fib Photmetry
Peri cue time (sec)	Normalized signal	Normalized signal	Normalized signal	Normalized signal	Normalized signal	Normalized signal		Normalized signal	Normalized signal	Normalized signal	Normalized signal	Normalized signal	Normalized signal					Peri action time (sec)	Normalized signal	Normalized signal	Normalized signal	Normalized signal	Normalized signal	Normalized signal		Normalized signal	Normalized signal	Normalized signal	Normalized signal	Normalized signal	Normalized signal
-0.9	0.828553	0.818281	0.48861	0.048671	0.686366	0.194434		0.137385	0.83781	0.171997	0.400956	0.133058	0.32589					-2	0.429519	0.861498	0.922467	0.285181	0.480988	0.323641		0.034471	0.098	0.017146	0.100326	0.032695	0.101175
-0.85	0.73147	0.766153	0.542747	0.012666	0.627348	0.132867		0.112777	0.951778	0.192839	0.456371	0.179571	0.264925					-1.95	0.47639	0.828599	0.918502	0.211095	0.455242	0.250781		0.031411	0.043693	0.016841	0.03937	0.042257	0.039762
-0.8	0.650411	0.57096	0.50499	0.071027	0.521056	0.135774		0.095365	1	0.186743	0.585402	0.214446	0.270938					-1.9	0.515233	0.824457	0.907669	0.224154	0.423742	0.246934		0.029891	0.087699	0.012997	0.074542	0.048763	0.079024
-0.75	0.590132	0.430437	0.428281	0.089541	0.411325	0.060534		0.079166	0.990841	0.173241	0.726808	0.23828	0.276046					-1.85	0.544194	0.814324	0.895137	0.199309	0.39762	0.21077		0.027769	0.057445	0.008155	0.031586	0.054138	0.052909
-0.7	0.542241	0.235223	0.343339	0.146936	0.323847	0.049659		0.061313	0.963617	0.161372	0.82855	0.250833	0.316962					-1.8	0.562164	0.814872	0.88424	0.208401	0.384314	0.221074		0.024663	0.081824	0.003717	0.049469	0.058602	0.095929
-0.65	0.505548	0.165875	0.263848	0.15143	0.281476	0		0.044585	0.919194	0.151401	0.904727	0.25553	0.31283					-1.75	0.573673	0.814818	0.877316	0.177419	0.3858	0.212685		0.02142	0.056463	0.000572	0.026372	0.060812	0.094867
-0.6	0.489893	0.15188	0.198052	0.159585	0.28536	0.018758		0.034598	0.877686	0.139407	0.962889	0.25757	0.31826					-1.7	0.582375	0.838779	0.877976	0.18718	0.395572	0.252901		0.018599	0.077851	0	0.055695	0.059487	0.122401
-0.55	0.498874	0.244856	0.153893	0.099057	0.309928	0.02941		0.033945	0.853996	0.121718	1	0.257996	0.313054					-1.65	0.585432	0.862359	0.887917	0.187701	0.398681	0.278758		0.015566	0.066448	0.003126	0.048834	0.055045	0.09663
-0.5	0.520384	0.315709	0.134928	0.045745	0.330483	0.083543		0.038429	0.851826	0.099708	0.989418	0.252176	0.323756					-1.6	0.575863	0.88427	0.903311	0.219956	0.385836	0.315614		0.011593	0.086815	0.009559	0.071667	0.049896	0.106974
-0.45	0.536995	0.394178	0.138628	0	0.339065	0.109203		0.038823	0.856912	0.07905	0.936542	0.235117	0.311222					-1.55	0.550054	0.891844	0.917146	0.230875	0.365577	0.300442		0.007053	0.075462	0.016894	0.061245	0.04687	0.100524
-0.4	0.538276	0.392454	0.164287	0.02653	0.338829	0.190863		0.027807	0.854969	0.063514	0.87174	0.207871	0.283855					-1.5	0.514828	0.899481	0.924507	0.259252	0.352058	0.279371		0.002815	0.089189	0.022517	0.079389	0.046965	0.128543
-0.35	0.525737	0.38031	0.216371	0.080962	0.340633	0.273682		0.008438	0.842254	0.054747	0.827101	0.179617	0.20745					-1.45	0.484567	0.908203	0.924844	0.27619	0.346142	0.246402		0	0.0803	0.026099	0.074797	0.048757	0.127014
-0.3	0.513356	0.30894	0.296099	0.183872	0.362324	0.389614		0	0.811494	0.06136	0.799273	0.168293	0.119003					-1.4	0.467177	0.928673	0.921608	0.320563	0.339321	0.244047		0.000813	0.097655	0.029323	0.092241	0.050795	0.137722
-0.25	0.518435	0.253865	0.395157	0.280283	0.418624	0.47208		0.036792	0.773552	0.105999	0.780815	0.200131	0.028163					-1.35	0.455951	0.941535	0.919671	0.352138	0.329608	0.232358		0.006963	0.090599	0.033112	0.083211	0.053689	0.12228
-0.2	0.54361	0.184482	0.506139	0.382793	0.508487	0.570104		0.153712	0.739903	0.217247	0.774873	0.299792	0					-1.3	0.439735	0.948516	0.920549	0.382529	0.320738	0.232631		0.016477	0.097588	0.036136	0.093835	0.05876	0.132001
-0.15	0.572395	0.157939	0.630095	0.43552	0.618617	0.617761		0.356247	0.696068	0.40409	0.784341	0.46993	0.030531					-1.25	0.416359	0.948141	0.920141	0.378304	0.3134	0.22241		0.0247	0.082649	0.036149	0.089129	0.065834	0.132776
-0.1	0.588246	0.097049	0.759561	0.473735	0.732701	0.652295		0.597444	0.650234	0.631574	0.772577	0.674993	0.124826					-1.2	0.392027	0.953637	0.912546	0.398347	0.307965	0.236658		0.02888	0.086784	0.032278	0.105872	0.07309	0.160949
-0.05	0.589598	0.044063	0.87076	0.469096	0.834495	0.653943		0.802589	0.613743	0.832534	0.723183	0.853982	0.231436					-1.15	0.372364	0.95966	0.896956	0.457572	0.305667	0.255963		0.030151	0.076104	0.026257	0.104697	0.078589	0.169447
0	0.583869	0	0.946419	0.459688	0.915221	0.681763		0.927758	0.593967	0.956241	0.638878	0.96253	0.361837					-1.1	0.356084	0.972667	0.87772	0.564475	0.303	0.297488		0.031606	0.084389	0.021506	0.119459	0.081276	0.186859
0.05	0.576197	0.069658	0.987796	0.426244	0.973352	0.694675		0.98275	0.583788	1	0.533317	1	0.500212					-1.05	0.336347	0.98332	0.856167	0.651382	0.296041	0.336884		0.035666	0.080287	0.020666	0.116827	0.080759	0.182346
0.1	0.56155	0.211251	1	0.410042	1	0.731307		1	0.572972	0.991722	0.427445	0.992973	0.652005					-1	0.310317	0.987799	0.828551	0.707487	0.287553	0.391845		0.042395	0.095232	0.024247	0.126726	0.077661	0.195352
0.15	0.525186	0.434495	0.984793	0.395902	0.976379	0.740072		0.994854	0.546672	0.952785	0.327272	0.960681	0.770686					-0.95	0.284948	0.976921	0.793439	0.698385	0.281753	0.433263		0.049604	0.098127	0.030942	0.119359	0.073837	0.19542
0.2	0.456606	0.623039	0.946093	0.412399	0.892104	0.749133		0.951158	0.48221	0.879242	0.219578	0.896582	0.871387					-0.9	0.269063	0.959448	0.754898	0.651539	0.276047	0.468397		0.055382	0.113503	0.038055	0.125091	0.071035	0.20376
0.25	0.360322	0.75914	0.88564	0.415488	0.760962	0.728706		0.836865	0.381793	0.751676	0.128167	0.77741	0.941015					-0.85	0.263242	0.940757	0.716792	0.578759	0.261212	0.467896		0.060899	0.111079	0.043	0.115623	0.070172	0.186893
0.3	0.252777	0.768094	0.798687	0.448214	0.614074	0.751943		0.641381	0.277438	0.564263	0.074308	0.593372	0.996172					-0.8	0.261368	0.933643	0.678957	0.530968	0.230166	0.450021		0.06992	0.118969	0.045635	0.119144	0.071906	0.172901
0.35	0.154619	0.734786	0.689143	0.486848	0.479358	0.762396		0.406088	0.181439	0.350075	0.04141	0.376092	1					-0.75	0.259695	0.935426	0.64049	0.501064	0.186577	0.411835		0.085104	0.111266	0.048038	0.105221	0.076887	0.146621
0.4	0.082334	0.648734	0.57768	0.552677	0.369635	0.801471		0.205993	0.097694	0.169284	0.007564	0.189745	0.975522					-0.7	0.26151	0.947179	0.600739	0.4979	0.142493	0.385912		0.1057	0.115681	0.052285	0.099522	0.085448	0.140605
0.45	0.040595	0.599747	0.481045	0.593645	0.286921	0.817008		0.091882	0.034539	0.064029	0	0.083618	0.925443					-0.65	0.272544	0.951192	0.558596	0.473235	0.108577	0.358008		0.129185	0.107365	0.060203	0.081851	0.097368	0.125269
0.5	0.022139	0.520487	0.399439	0.645023	0.232867	0.848956		0.059641	0	0.032688	0.0394	0.057917	0.897495					-0.6	0.29239	0.941075	0.518141	0.422216	0.08836	0.33379		0.153536	0.109744	0.073744	0.081977	0.112444	0.124229
0.55	0.016177	0.443803	0.32919	0.67468	0.207831	0.833593		0.071768	0.014186	0.045374	0.118995	0.0774	0.872248					-0.55	0.310029	0.916724	0.487127	0.335465	0.07877	0.288822		0.177506	0.10004	0.093065	0.073551	0.131008	0.114897
0.6	0.015868	0.303224	0.269552	0.727177	0.202131	0.821321		0.092779	0.065359	0.070845	0.205909	0.1055	0.869784					-0.5	0.310769	0.888459	0.466773	0.270153	0.072861	0.244993		0.199849	0.103455	0.116279	0.078981	0.153398	0.11725
0.65	0.019586	0.206627	0.220169	0.76237	0.200001	0.766294		0.104874	0.1256	0.090336	0.251893	0.12313	0.848869					-0.45	0.291744	0.856004	0.451803	0.243107	0.066017	0.186563		0.218945	0.095379	0.142825	0.072401	0.18007	0.101378
0.7	0.029402	0.107854	0.183739	0.848903	0.187457	0.770058		0.103963	0.17507	0.098	0.237061	0.127749	0.827359					-0.4	0.26444	0.820536	0.434445	0.26689	0.064671	0.138189		0.233428	0.097569	0.174952	0.078592	0.213597	0.092925
0.75	0.045754	0.117286	0.164691	0.919321	0.151322	0.760163		0.091791	0.197721	0.096087	0.205101	0.123746	0.774175					-0.35	0.239798	0.769706	0.405456	0.299782	0.082075	0.093502		0.243494	0.088024	0.216253	0.073964	0.25986	0.08229
0.8	0.061209	0.132195	0.163568	1	0.087802	0.82443		0.071512	0.21971	0.090878	0.214858	0.114306	0.741182					-0.3	0.218911	0.71849	0.361192	0.333237	0.119358	0.069618		0.252313	0.090992	0.269619	0.078199	0.324072	0.106145
0.85	0.065688	0.228545	0.181596	0.979264	0.020965	0.844751		0.047688	0.255302	0.091992	0.269617	0.101936	0.686687					-0.25	0.195277	0.681092	0.310432	0.321618	0.158372	0.048732		0.264579	0.086224	0.332766	0.065259	0.402657	0.141687
0.9	0.056146	0.203903	0.225907	0.957919	0	0.93806		0.030008	0.308424	0.111339	0.340999	0.094257	0.689445					-0.2	0.161368	0.662835	0.267837	0.26385	0.175368	0.02926		0.281169	0.097102	0.394329	0.059651	0.481104	0.201943
0.95	0.033347	0.237961	0.30059	0.850148	0.062817	0.915374		0.029696	0.389108	0.155835	0.426188	0.101112	0.693225					-0.15	0.117768	0.64406	0.238108	0.155245	0.157829	0		0.296891	0.09938	0.438656	0.045704	0.543513	0.251905
1	0	0.062754	0.396184	0.857708	0.194136	1		0.045931	0.501021	0.218939	0.482338	0.122066	0.778182					-0.1	0.075032	0.608271	0.212518	0.055338	0.114253	0.00521		0.305486	0.111749	0.457002	0.05118	0.582835	0.299295
																		-0.05	0.043415	0.552552	0.18018	0	0.068747	0.035539		0.305889	0.114311	0.452775	0.052578	0.601018	0.315872
																		0	0.023725	0.497293	0.134621	0.006657	0.038583	0.079053		0.303195	0.130363	0.436223	0.071474	0.603285	0.331843
																		0.05	0.011063	0.447547	0.078002	0.030156	0.021384	0.102307		0.303957	0.133015	0.415745	0.080101	0.592871	0.328845
																		0.1	0.003074	0.405744	0.025987	0.063382	0.008272	0.126732		0.310099	0.142333	0.392731	0.092736	0.567843	0.334507
																		0.15	0	0.361033	0	0.06362	0	0.147027		0.316801	0.137275	0.363387	0.085015	0.524094	0.330143
																		0.2	0.003376	0.313422	0.010619	0.042032	0.008083	0.170336		0.316939	0.143085	0.326967	0.086273	0.464996	0.338394
																		0.25	0.017689	0.258864	0.049173	0.030463	0.047386	0.173173		0.308055	0.138954	0.290855	0.079339	0.405481	0.333356
																		0.3	0.044824	0.202107	0.097236	0.077635	0.12316	0.16917		0.294	0.146359	0.265317	0.088117	0.361715	0.341527
																		0.35	0.07813	0.144451	0.14418	0.133662	0.218955	0.158363		0.280069	0.138607	0.254736	0.086815	0.338826	0.33876
																		0.4	0.108834	0.096755	0.190942	0.161097	0.305691	0.167833		0.267988	0.139165	0.254797	0.100117	0.330549	0.340017
																		0.45	0.133194	0.065189	0.243199	0.152425	0.36652	0.177958		0.255112	0.125441	0.256391	0.102288	0.326122	0.3198
																		0.5	0.15166	0.051503	0.306923	0.158092	0.403764	0.190594		0.236966	0.122252	0.251412	0.11508	0.316127	0.305568
																		0.55	0.167315	0.037349	0.380444	0.191346	0.425076	0.184874		0.211144	0.106453	0.236532	0.114692	0.296336	0.280477
																		0.6	0.183419	0.021929	0.450614	0.278246	0.437363	0.190128		0.182273	0.103354	0.214873	0.125529	0.270682	0.271656
																		0.65	0.199113	0.008088	0.505123	0.378427	0.449366	0.203498		0.166704	0.087623	0.197865	0.118868	0.252741	0.254334
																		0.7	0.208909	0.003581	0.5444	0.477353	0.46588	0.232996		0.190563	0.084895	0.206884	0.123151	0.263118	0.262879
																		0.75	0.207692	0	0.577223	0.530213	0.483844	0.257785		0.274361	0.067512	0.26607	0.118045	0.319194	0.290105
																		0.8	0.196537	0.003716	0.610364	0.553058	0.500372	0.314293		0.412111	0.063717	0.381575	0.135055	0.419077	0.369319
																		0.85	0.181328	0.01894	0.646071	0.545745	0.516833	0.383805		0.570142	0.0482	0.528562	0.148451	0.537264	0.45728
																		0.9	0.16676	0.05227	0.680707	0.530839	0.533193	0.474686		0.712005	0.054379	0.66862	0.192288	0.643756	0.558841
																		0.95	0.154343	0.087649	0.70335	0.486357	0.546874	0.559758		0.821228	0.065165	0.779206	0.235616	0.725254	0.621458
																		1	0.143427	0.117316	0.706727	0.454641	0.558443	0.648255		0.901607	0.127277	0.862082	0.310404	0.785623	0.681666
																		1.05	0.133342	0.140854	0.696066	0.449418	0.570872	0.703747		0.961986	0.21908	0.928186	0.382143	0.831883	0.712819
																		1.1	0.125937	0.186735	0.679484	0.510468	0.582211	0.753558		1	0.369012	0.978991	0.47553	0.861313	0.74817
																		1.15	0.124876	0.249178	0.660891	0.593341	0.585026	0.797248		0.998532	0.514532	1	0.545094	0.858567	0.756849
																		1.2	0.132235	0.31199	0.647444	0.694651	0.575254	0.870966		0.942606	0.662669	0.971003	0.622221	0.807229	0.779889
																		1.25	0.148059	0.355958	0.649499	0.7604	0.562149	0.924122		0.842812	0.759016	0.888535	0.661973	0.709962	0.785437
																		1.3	0.173927	0.380974	0.669147	0.816824	0.566404	0.966603		0.735252	0.844496	0.778807	0.709337	0.595223	0.822909
																		1.35	0.211891	0.368614	0.701813	0.843241	0.603552	0.977095		0.65525	0.878868	0.6818	0.724854	0.498634	0.842889
																		1.4	0.257553	0.3406	0.746618	0.867334	0.669593	0.989193		0.617372	0.915825	0.623683	0.761813	0.440551	0.88771
																		1.45	0.301001	0.318539	0.80265	0.842371	0.742882	0.966823		0.617493	0.912297	0.606966	0.77081	0.421861	0.896435
																		1.5	0.336754	0.335177	0.862401	0.819147	0.800521	0.966887		0.643266	0.932435	0.620104	0.811026	0.432939	0.923446
																		1.55	0.366949	0.382112	0.917034	0.789328	0.835067	0.964103		0.682476	0.917679	0.649687	0.816982	0.463716	0.915583
																		1.6	0.396488	0.461772	0.961612	0.813044	0.856576	0.996642		0.727185	0.937404	0.686089	0.856496	0.50918	0.945452
																		1.65	0.429638	0.543047	0.99201	0.833829	0.876753	0.989891		0.772449	0.915849	0.725119	0.849569	0.568298	0.925551
																		1.7	0.469709	0.633403	1	0.902399	0.890436	0.999539		0.812972	0.943706	0.766839	0.888388	0.640645	0.944886
																		1.75	0.525904	0.716516	0.975045	0.929418	0.88675	0.971878		0.840265	0.912229	0.809444	0.866561	0.724847	0.904783
																		1.8	0.622431	0.815204	0.912434	0.9846	0.883191	1		0.840464	0.953517	0.844085	0.921598	0.816778	0.946427
																		1.85	0.784078	0.895432	0.817816	0.939812	0.918853	0.950586		0.801513	0.899695	0.861115	0.8796	0.909706	0.894308
																		1.9	1	1	0.704996	1	1	0.977587		0.731063	1	0.862705	1	1	1
