# Supplementary material for: Learning of probabilistic punishment as a model of anxiety produces changes in action but not punisher encoding in the dmPFC and VTA
Source: eLife. 2022 Sep 14;11:e78912. doi: 10.7554/eLife.78912 (PMC9525102; doi:10.7554/eLife.78912)
Supplement: Figure 3—source data 1. [file elife-78912-fig3-data1.xlsx]

## Sheet: Figure3A-C
Trials completed (3A)												Action Latency (3B)												Retrieval Latency (3C)
	251	252	256	257	264	283	318	320	321				251	252	256	257	264	283	318	320	321				251	252	256	257	264	283	318	320	321
FR1 Session 1	28	90	68	56	10	10	77	25	13			FR1 Session 1	90.8979	20.2467	34.2232	47.1886	232.072	218.994	29.5356	121.303	90.8815			FR1 Session 1	6.89857	6.51682	5.94353	4.57429	15.634	26.17	4.74842	10.0512	7.29231
FR1 Session 2	77	90	83	51	40	52	68	81	90			FR1 Session 2	30.1636	11.5144	26.7853	49.5988	43.4845	40.2065	25.6385	22.9486	18.6856			FR1 Session 2	3.9039	2.69705	3.64217	2.22745	8.4025	4.96615	11.3338	7.46642	3.23
FR1 Session 3	90	90	90	90	88	73	90	72	90			FR1 Session 3	18.1014	9.46966	13.0076	14.2524	23.4425	27.8553	5.00944	12.5478	10.7391			FR1 Session 3	2.51523	1.81204	2.73955	1.80705	3.29977	8.27611	2.17091	5.30761	3.22614
FR1 Session 4	90		90	90	88	77	90	90	90			FR1 Session 4	10.7944		16.6798	19.02	24.5873	23.6403	6.69303	9.57393	6.6991			FR1 Session 4	2.035		2.62796	1.60477	3.67341	3.26364	1.75659	7.2025	2.03182

## Sheet: Figure3D
													CUE (dmpfc)
		S251	S252	S256	S257	S264	S283	S318	S320	S321	S251	S252	S256	S257	S264	S283	S318	S320	S321	S252	S256	S257	S264	S283	S318	S320	S321	S251	S256	S257	S264	S283	S318	S320	S321				S251	S252	S256	S257	S264	S283	S318	S320	S321	S251	S252
FR1 Session (D1=Session 1, etc)		D1	D1	D1	D1	D1	D1	D1	D1	D1	D2	D2	D2	D2	D2	D2	D2	D2	D2	D3	D3	D3	D3	D3	D3	D3	D3	D5(used as D4)	D4	D4	D4	D4	D4	D4	D4				D1	D1	D1	D1	D1	D1	D1	D1	D1	D2	D2
Peri-cue time - sec		z-score of df/f	z-score of df/f	z-score of df/f	z-score of df/f	z-score of df/f	z-score of df/f	z-score of df/f	z-score of df/f	z-score of df/f	z-score of df/f	z-score of df/f	z-score of df/f	z-score of df/f	z-score of df/f	z-score of df/f	z-score of df/f	z-score of df/f	z-score of df/f	z-score of df/f	z-score of df/f	z-score of df/f	z-score of df/f	z-score of df/f	z-score of df/f	z-score of df/f	z-score of df/f	z-score of df/f	z-score of df/f	z-score of df/f	z-score of df/f	z-score of df/f	z-score of df/f	z-score of df/f	z-score of df/f			Peri-action time - sec	z-score of df/f	z-score of df/f	z-score of df/f	z-score of df/f	z-score of df/f	z-score of df/f	z-score of df/f	z-score of df/f	z-score of df/f	z-score of df/f	z-score of df/f
-1.0736		-0.02885	-0.46554	0.416022	0.851824	0.609394	-0.06297	-0.08457	1.12992	-0.16141	0.267036	-0.49116	-0.08114	0.078207	1.56595	0.819843	0.653121	0.69257	-0.08289	0.313205	0.099251	0.181863	0.351267	0.017123	0.440854	0.24622	0.110736	0.329884	0.602714	0.576517	0.10164	0.497189	0.678669	0.501284	0.146137			-2.0496	0.154356	-0.157126	-0.0752908	-0.315105	0.657264	0.083061	-0.0970986	0.26493	-0.237091	0.052138	0.0105222
-1.0492		-0.0769	-0.47605	0.387545	0.851678	0.60039	-0.07542	-0.04963	1.14538	-0.24709	0.252209	-0.48875	-0.08378	0.037865	1.48697	0.827449	0.666991	0.685333	-0.09159	0.292578	0.09506	0.168448	0.359611	0.029924	0.471932	0.201175	0.103264	0.317015	0.619557	0.576287	0.149951	0.486894	0.690497	0.525135	0.117081			-2.0252	0.207224	-0.143529	-0.0539176	-0.305482	0.631679	0.107438	-0.110046	0.268629	-0.291102	0.0562325	0.00523077
-1.0248		-0.12545	-0.47481	0.365477	0.84628	0.61306	-0.08885	-0.01243	1.17379	-0.36895	0.231594	-0.48182	-0.09613	0.008334	1.40484	0.829693	0.678078	0.67682	-0.09843	0.259961	0.087163	0.151087	0.371844	0.043613	0.498387	0.156292	0.09981	0.307256	0.633729	0.572029	0.196789	0.473207	0.69473	0.552659	0.073477			-2.0008	0.257207	-0.137279	-0.0129654	-0.281856	0.61	0.128697	-0.125823	0.280467	-0.360961	0.0599038	7.17e-05
-1.0004		-0.16889	-0.46108	0.355814	0.837794	0.642626	-0.10305	0.027185	1.21522	-0.50698	0.205495	-0.47385	-0.11933	-0.00841	1.32501	0.826418	0.683831	0.670255	-0.10278	0.218062	0.076446	0.126474	0.387935	0.058807	0.519097	0.114104	0.103364	0.302371	0.641666	0.565101	0.24099	0.455488	0.692857	0.582459	0.026914			-1.9764	0.30208	-0.141179	0.0425287	-0.241352	0.594658	0.145286	-0.144012	0.301904	-0.4411	0.0645822	-0.00738675
-0.976		-0.2017	-0.43979	0.359029	0.830477	0.679634	-0.11649	0.067645	1.26688	-0.64031	0.175075	-0.46863	-0.15234	-0.01326	1.25144	0.817498	0.682754	0.66799	-0.10475	0.173438	0.064835	0.093125	0.407543	0.075703	0.533865	0.07724	0.114991	0.303446	0.639215	0.556837	0.281211	0.433201	0.687635	0.612222	-0.01371			-1.952	0.339708	-0.153329	0.103486	-0.18424	0.585567	0.159782	-0.16407	0.331062	-0.52318	0.0713741	-0.0205019
-0.9516		-0.21895	-0.41833	0.372787	0.828623	0.712726	-0.12534	0.106032	1.32413	-0.75668	0.142148	-0.46904	-0.19203	-0.00829	1.18615	0.802859	0.674873	0.670825	-0.10317	0.133738	0.054665	0.051655	0.429517	0.093875	0.543783	0.047635	0.133045	0.310582	0.623548	0.548097	0.316099	0.406335	0.681418	0.639424	-0.04512			-1.9276	0.368466	-0.172107	0.157231	-0.114224	0.583241	0.17884	-0.185359	0.364378	-0.59791	0.0808705	-0.0427609
-0.9272		-0.21722	-0.4017	0.397352	0.833818	0.73204	-0.12468	0.139221	1.38171	-0.8511	0.108858	-0.47647	-0.2341	0.005611	1.13007	0.782327	0.661642	0.678051	-0.09703	0.104503	0.048244	0.003744	0.451835	0.112368	0.550985	0.026229	0.155956	0.323025	0.594741	0.538858	0.344778	0.376117	0.675639	0.661981	-0.06755			-1.9032	0.387853	-0.198596	0.192942	-0.0371741	0.587166	0.208448	-0.207103	0.398373	-0.658013	0.0931863	-0.0760868
-0.9028		-0.1956	-0.38957	0.434977	0.84448	0.731289	-0.11268	0.16481	1.43467	-0.92133	0.07721	-0.49045	-0.27429	0.029439	1.08408	0.755294	0.645286	0.688072	-0.08716	0.0879	0.047402	-0.04911	0.472076	0.129824	0.557726	0.013115	0.184926	0.339425	0.556039	0.528031	0.367342	0.345858	0.671522	0.678798	-0.0822			-1.8788	0.398932	-0.234281	0.207535	0.0397009	0.596052	0.247047	-0.228408	0.430472	-0.696742	0.108154	-0.120039
-0.8784		-0.15609	-0.37801	0.485442	0.85778	0.708231	-0.09214	0.181281	1.47966	-0.96633	0.048568	-0.50902	-0.30915	0.063478	1.04958	0.721791	0.628005	0.699122	-0.07441	0.082954	0.052618	-0.10594	0.488006	0.144807	0.565522	0.007571	0.221436	0.358026	0.512566	0.513767	0.38471	0.320147	0.670755	0.690014	-0.09209			-1.8544	0.403995	-0.278784	0.204394	0.109187	0.608104	0.284489	-0.248449	0.459378	-0.706128	0.125666	-0.172522
-0.854		-0.10298	-0.364	0.545194	0.872083	0.664153	-0.06785	0.187643	1.51596	-0.98755	0.0234	-0.52983	-0.33651	0.10466	1.02788	0.684171	0.611276	0.709482	-0.05694	0.086685	0.062846	-0.16563	0.497942	0.156568	0.575124	0.007965	0.262797	0.376855	0.469526	0.494144	0.397921	0.302136	0.675269	0.696832	-0.10156			-1.83	0.405417	-0.329565	0.187952	0.166616	0.621299	0.308012	-0.266651	0.485193	-0.682451	0.145863	-0.229876
-0.8296		-0.04123	-0.3497	0.609413	0.887961	0.602512	-0.04265	0.183243	1.54446	-0.99032	0.001272	-0.55063	-0.35564	0.146927	1.01898	0.64664	0.595306	0.71732	-0.0319	0.096084	0.076365	-0.22619	0.501041	0.165614	0.587023	0.011876	0.302773	0.394065	0.431087	0.468691	0.407673	0.292014	0.685914	0.701165	-0.11313			-1.8056	0.404618	-0.381102	0.161687	0.210637	0.633557	0.307801	-0.282768	0.50905	-0.63048	0.168911	-0.286869
-0.8052		0.024805	-0.34132	0.673302	0.906604	0.527028	-0.01542	0.168083	1.56565	-0.98325	-0.01907	-0.56793	-0.36699	0.183338	1.02092	0.613254	0.57925	0.720797	-8.56e-05	0.109468	0.091252	-0.28447	0.497705	0.173388	0.601539	0.016617	0.335854	0.408394	0.399897	0.439716	0.414499	0.287924	0.701606	0.705165	-0.12725			-1.7812	0.401905	-0.425299	0.129878	0.241385	0.642818	0.27848	-0.296742	0.532688	-0.559101	0.194744	-0.339002
-0.7808		0.091302	-0.34209	0.732702	0.927215	0.440569	0.015731	0.143252	1.57969	-0.97518	-0.03923	-0.57647	-0.3714	0.208004	1.03014	0.58648	0.562487	0.718489	0.033505	0.125697	0.105384	-0.3366	0.48984	0.181403	0.618543	0.02008	0.359937	0.419421	0.376534	0.411364	0.419341	0.287138	0.720664	0.710587	-0.14389			-1.7568	0.397038	-0.454796	0.0978738	0.258706	0.647058	0.21834	-0.308466	0.557333	-0.476561	0.2232	-0.384883
-0.7564		0.154341	-0.34804	0.783978	0.946284	0.345646	0.048437	0.110998	1.58717	-0.97254	-0.06035	-0.57098	-0.36965	0.217519	1.04255	0.566634	0.545589	0.709796	0.063386	0.143171	0.116974	-0.37935	0.480564	0.190674	0.637606	0.021392	0.375964	0.427397	0.359421	0.387217	0.42404	0.286463	0.742396	0.718314	-0.16248			-1.7324	0.389961	-0.466121	0.0696458	0.262013	0.644405	0.129766	-0.31774	0.582046	-0.391056	0.254281	-0.424974
-0.732		0.20979	-0.352	0.823384	0.959589	0.245526	0.075766	0.074555	1.58896	-0.97878	-0.08256	-0.54817	-0.36268	0.211599	1.05439	0.55189	0.530019	0.695202	0.086897	0.161488	0.125083	-0.4109	0.473194	0.201905	0.658411	0.020853	0.38611	0.4328	0.345741	0.369283	0.431118	0.282994	0.766844	0.728303	-0.18259			-1.708	0.381255	-0.459792	0.0474345	0.251201	0.633391	0.0209254	-0.324423	0.603907	-0.313249	0.288064	-0.459295
-0.7076		0.254225	-0.34894	0.847861	0.964955	0.14483	0.089772	0.037751	1.5859	-0.99351	-0.10514	-0.50802	-0.3519	0.193098	1.06311	0.538729	0.517434	0.676176	0.105324	0.182899	0.129097	-0.43022	0.469946	0.215818	0.68071	0.019255	0.392946	0.436044	0.332639	0.358643	0.442879	0.275427	0.793955	0.739957	-0.20501			-1.6836	0.372015	-0.438614	0.0341519	0.227732	0.613215	-0.0946471	-0.328598	0.620328	-0.254032	0.324397	-0.487741
-0.6832		0.286086	-0.3375	0.85681	0.962982	0.049543	0.085482	0.004248	1.5795	-1.01187	-0.12686	-0.45409	-0.33894	0.167651	1.06788	0.523558	0.509016	0.654869	0.121589	0.209516	0.128358	-0.43651	0.471347	0.232929	0.703858	0.017244	0.398083	0.437546	0.318524	0.355921	0.460651	0.264733	0.823266	0.752566	-0.23053			-1.6592	0.363317	-0.407374	0.0320164	0.19537	0.584237	-0.200253	-0.330701	0.631277	-0.217559	0.362665	-0.510333
-0.6588		0.305811	-0.31991	0.852988	0.955313	-0.03364	0.062776	-0.02316	1.57295	-1.02673	-0.14656	-0.39212	-0.32505	0.141551	1.06909	0.505104	0.504669	0.633919	0.136379	0.239651	0.122998	-0.42943	0.477047	0.25305	0.726456	0.015103	0.400337	0.437913	0.304354	0.361049	0.484747	0.253591	0.853696	0.765623	-0.25849			-1.6348	0.355647	-0.373376	0.0369213	0.159941	0.548435	-0.280373	-0.33149	0.639393	-0.199484	0.401699	-0.526316
-0.6344		0.315054	-0.3007	0.841316	0.942666	-0.0988	0.024002	-0.0428	1.56981	-1.03256	-0.16363	-0.32722	-0.31045	0.11798	1.06704	0.485246	0.502844	0.615948	0.147366	0.268548	0.114112	-0.40983	0.487324	0.275061	0.746579	0.012696	0.398255	0.43789	0.293571	0.372543	0.514867	0.245134	0.88346	0.778987	-0.28675			-1.6104	0.34871	-0.344852	0.0378531	0.12777	0.509083	-0.326928	-0.331985	0.647895	-0.19174	0.439873	-0.535806
-0.61		0.316095	-0.28372	0.825372	0.923832	-0.14237	-0.02861	-0.05412	1.57202	-1.02689	-0.17804	-0.26232	-0.29412	0.095146	1.06102	0.467516	0.50122	0.60271	0.151842	0.292636	0.10247	-0.38075	0.50365	0.29713	0.762148	0.009473	0.393868	0.437999	0.29008	0.386937	0.550393	0.241644	0.910287	0.792948	-0.31073			-1.586	0.341733	-0.327816	0.0234888	0.103428	0.46972	-0.340411	-0.333287	0.658397	-0.186384	0.475292	-0.541575
-0.5856		0.311299	-0.27127	0.806087	0.895849	-0.16368	-0.09164	-0.05772	1.58028	-1.00892	-0.19005	-0.19887	-0.27437	0.068688	1.04935	0.455157	0.497736	0.594711	0.14863	0.311784	0.087876	-0.34628	0.527907	0.317316	0.771185	0.004696	0.390656	0.438354	0.295658	0.399756	0.590415	0.243672	0.931632	0.808151	-0.32307			-1.5616	0.333841	-0.324394	-0.0115051	0.0890455	0.433056	-0.324808	-0.336202	0.670187	-0.177733	0.506165	-0.546525
-0.5612		0.302529	-0.26481	0.785078	0.856273	-0.16492	-0.15833	-0.05514	1.59469	-0.97901	-0.19986	-0.13807	-0.24977	0.036096	1.03025	0.450261	0.491469	0.591672	0.137518	0.327369	0.069867	-0.30892	0.561264	0.334166	0.772572	-0.0022	0.390161	0.438916	0.309384	0.407609	0.633689	0.250137	0.944741	0.825346	-0.31681			-1.5372	0.324156	-0.33248	-0.0631785	0.0854864	0.400286	-0.284107	-0.341033	0.681206	-0.165459	0.531453	-0.550935
-0.5368		0.291102	-0.26431	0.765471	0.805498	-0.15077	-0.21973	-0.04828	1.61416	-0.93681	-0.20758	-0.08258	-0.21967	-0.00062	1.00248	0.453708	0.482777	0.593188	0.119438	0.340094	0.048495	-0.26994	0.603492	0.346746	0.766832	-0.01136	0.393474	0.439769	0.329359	0.40935	0.678539	0.259162	0.947109	0.844977	-0.29103			-1.5128	0.312041	-0.345935	-0.118398	0.0922629	0.371411	-0.223929	-0.347484	0.690186	-0.155135	0.551287	-0.552951
-0.5124		0.278065	-0.26851	0.748064	0.745837	-0.12775	-0.26956	-0.03878	1.63657	-0.87708	-0.21311	-0.03722	-0.18429	-0.03512	0.965666	0.46545	0.472886	0.598897	0.09655	0.349729	0.02474	-0.23189	0.652858	0.354156	0.755714	-0.02239	0.402369	0.441085	0.353925	0.405788	0.72265	0.268652	0.93747	0.866785	-0.25336			-1.4884	0.297792	-0.357797	-0.161528	0.105921	0.346137	-0.154692	-0.354518	0.697556	-0.153202	0.56666	-0.549419
-0.488		0.264167	-0.27645	0.730672	0.679483	-0.1031	-0.30785	-0.02784	1.6591	-0.79192	-0.2161	-0.00706	-0.14473	-0.05918	0.920498	0.484893	0.463672	0.608346	0.069985	0.355077	0.000856	-0.19861	0.706683	0.355473	0.740912	-0.03433	0.417321	0.442927	0.381395	0.398748	0.763208	0.276659	0.916683	0.889739	-0.21558			-1.464	0.283188	-0.364036	-0.184796	0.120298	0.324187	-0.0898505	-0.360656	0.704222	-0.162836	0.578626	-0.536121
-0.4636		0.249695	-0.28688	0.710565	0.608728	-0.0831	-0.33789	-0.01619	1.67847	-0.68189	-0.21581	0.005601	-0.1023	-0.06586	0.868737	0.510686	0.45738	0.620865	0.03978	0.354335	-0.01958	-0.17326	0.762221	0.350455	0.723537	-0.04552	0.437198	0.445227	0.409753	0.390047	0.797479	0.281699	0.887721	0.912467	-0.18673			-1.4396	0.271197	-0.362276	-0.191556	0.129169	0.305511	-0.0402712	-0.364518	0.710858	-0.184761	0.587784	-0.509387
-0.4392		0.234526	-0.29716	0.685361	0.53693	-0.07168	-0.36031	-0.00422	1.69278	-0.56082	-0.21092	0.001706	-0.05793	-0.05083	0.813223	0.54053	0.455828	0.635413	0.007423	0.346749	-0.03253	-0.15739	0.817004	0.340144	0.704701	-0.0539	0.460059	0.447887	0.436503	0.380803	0.823207	0.282864	0.854454	0.933916	-0.16964			-1.4152	0.264883	-0.350175	-0.188992	0.128752	0.291027	-0.0117187	-0.365096	0.71793	-0.217993	0.594461	-0.468567
-0.4148		0.218487	-0.30384	0.655154	0.467953	-0.07018	-0.37318	0.007778	1.70314	-0.44468	-0.19931	-0.01627	-0.0127	-0.01178	0.75778	0.572219	0.459716	0.650549	-0.02382	0.333991	-0.03522	-0.15072	0.868808	0.326633	0.685778	-0.05757	0.483638	0.4508	0.458353	0.371429	0.838868	0.280102	0.820249	0.953666	-0.16086			-1.3908	0.266278	-0.328818	-0.181523	0.11876	0.282463	-0.00455273	-0.361818	0.725298	-0.259433	0.599264	-0.416728
-0.3904		0.201703	-0.30443	0.624473	0.405176	-0.07802	-0.37673	0.019327	1.71321	-0.34247	-0.17872	-0.04557	0.03188	0.051341	0.706573	0.604641	0.468609	0.664637	-0.05024	0.318857	-0.0276	-0.15078	0.916038	0.31231	0.667583	-0.05546	0.506889	0.453782	0.471514	0.362154	0.844082	0.27467	0.787435	0.971704	-0.15352			-1.3664	0.276048	-0.304292	-0.17318	0.101949	0.280758	-0.0142526	-0.354402	0.732426	-0.305686	0.603364	-0.359319
-0.366		0.184475	-0.29787	0.598957	0.351032	-0.09333	-0.37521	0.029709	1.72689	-0.26079	-0.14776	-0.08324	0.074256	0.134875	0.662671	0.636958	0.481184	0.675949	-0.0685	0.302699	-0.0125	-0.1531	0.958197	0.299379	0.649741	-0.04763	0.530788	0.456514	0.472966	0.353354	0.839783	0.26916	0.757266	0.988217	-0.14208			-1.342	0.293951	-0.283517	-0.170851	0.0825174	0.284715	-0.0356768	-0.342601	0.738682	-0.355118	0.608209	-0.302038
-0.3416		0.166602	-0.28251	0.580393	0.306076	-0.11375	-0.37365	0.037806	1.74649	-0.20667	-0.10684	-0.12573	0.112945	0.231604	0.626884	0.667074	0.495318	0.682639	-0.07754	0.285196	0.005789	-0.15268	0.99568	0.2896	0.631244	-0.03494	0.556739	0.458577	0.461759	0.345389	0.828028	0.266559	0.729978	1.00364	-0.12444			-1.3176	0.31926	-0.270823	-0.179493	0.0647213	0.290962	-0.0662718	-0.3261	0.743386	-0.405918	0.614803	-0.248616
-0.3172		0.146692	-0.25734	0.566147	0.267968	-0.13718	-0.37415	0.0421	1.77367	-0.18304	-0.05818	-0.1682	0.146588	0.333383	0.597961	0.692184	0.508261	0.683169	-0.08107	0.266167	0.023933	-0.14568	1.02908	0.283792	0.611457	-0.01857	0.584163	0.45956	0.439427	0.338496	0.811703	0.268816	0.705113	1.01862	-0.10119			-1.2932	0.350645	-0.268033	-0.195757	0.0524523	0.294917	-0.103386	-0.304548	0.747281	-0.452371	0.623146	-0.200689
-0.2928		0.122351	-0.22752	0.552974	0.232442	-0.16189	-0.3744	0.04098	1.81127	-0.18806	-0.00517	-0.20549	0.174231	0.432829	0.57359	0.711288	0.517143	0.677218	-0.08567	0.247212	0.041013	-0.13021	1.05881	0.281498	0.59067	0.000331	0.609655	0.459288	0.409468	0.332754	0.794038	0.276115	0.682129	1.03377	-0.07604			-1.2688	0.385769	-0.274199	-0.209946	0.048534	0.292352	-0.141795	-0.278036	0.75409	-0.48597	0.632356	-0.160001
-0.2684		0.091276	-0.20392	0.540403	0.196011	-0.18607	-0.36807	0.033026	1.86166	-0.21901	0.048572	-0.23453	0.195454	0.523025	0.551372	0.725639	0.519829	0.666127	-0.09579	0.231596	0.057824	-0.10609	1.08515	0.281273	0.569994	0.020915	0.629455	0.458051	0.376193	0.327908	0.777877	0.286882	0.661015	1.04926	-0.05501			-1.2444	0.421314	-0.28535	-0.212349	0.053433	0.281027	-0.175606	-0.247754	0.768728	-0.500463	0.641463	-0.128978
-0.244		0.052434	-0.1949	0.530134	0.157624	-0.20812	-0.34815	0.017331	1.92431	-0.27042	0.099785	-0.25423	0.210296	0.598467	0.529486	0.736216	0.51581	0.652429	-0.11213	0.222017	0.075367	-0.07435	1.10844	0.281192	0.550529	0.042746	0.643582	0.456623	0.34376	0.323937	0.765141	0.298641	0.642104	1.06457	-0.04263			-1.22	0.453721	-0.297722	-0.196877	0.0652504	0.261511	-0.20129	-0.215966	0.793459	-0.494657	0.650038	-0.10919
-0.2196		0.006746	-0.20119	0.522871	0.117864	-0.22706	-0.31204	-0.00618	1.9969	-0.32896	0.145891	-0.2638	0.219076	0.65721	0.506937	0.742707	0.506361	0.638943	-0.13295	0.219341	0.094073	-0.03706	1.12918	0.279361	0.532639	0.065724	0.656559	0.456024	0.315786	0.321655	0.756548	0.309933	0.625289	1.07882	-0.0396			-1.1956	0.480283	-0.310429	-0.16285	0.0812496	0.236659	-0.21973	-0.185337	0.826591	-0.472783	0.658014	-0.100655
-0.1952		-0.04295	-0.21766	0.51567	0.077573	-0.24263	-0.26303	-0.03684	2.07738	-0.37713	0.185456	-0.26317	0.222464	0.70067	0.483627	0.745256	0.494011	0.627932	-0.15498	0.224099	0.11377	0.002816	1.14824	0.274676	0.516232	0.090035	0.673578	0.457226	0.294993	0.321998	0.751352	0.321518	0.610138	1.09128	-0.04301			-1.1712	0.500039	-0.323217	-0.114705	0.0983687	0.210162	-0.234751	-0.158177	0.864388	-0.441141	0.665073	-0.101825
-0.1708		-0.09286	-0.23803	0.503007	0.037722	-0.25469	-0.20725	-0.07351	2.16276	-0.40241	0.218423	-0.25395	0.221739	0.731494	0.460366	0.745409	0.481754	0.620707	-0.17314	0.237662	0.133992	0.041967	1.16681	0.267399	0.501293	0.116009	0.696239	0.460932	0.28273	0.325231	0.747405	0.335434	0.596739	1.10173	-0.04834			-1.1468	0.513769	-0.334319	-0.0592709	0.112506	0.184952	-0.247928	-0.13591	0.903442	-0.402152	0.670218	-0.109165
-0.1464		-0.13965	-0.25801	0.481139	-0.00063	-0.26272	-0.1508	-0.11462	2.24749	-0.39994	0.245742	-0.23846	0.218467	0.752451	0.438638	0.745271	0.471987	0.617928	-0.18143	0.260918	0.154195	0.077207	1.18609	0.258755	0.487833	0.143787	0.722245	0.467386	0.278871	0.330994	0.741929	0.353096	0.586038	1.11078	-0.05298			-1.1224	0.522941	-0.342147	-0.00312905	0.119722	0.162363	-0.256029	-0.119078	0.941872	-0.35621	0.671923	-0.117264
-0.122		-0.18132	-0.27542	0.451098	-0.03678	-0.26602	-0.09809	-0.15803	2.32513	-0.37107	0.268661	-0.21841	0.213804	0.766262	0.42039	0.746548	0.465912	0.619989	-0.17687	0.292873	0.173608	0.106271	1.20716	0.250097	0.475676	0.173226	0.748726	0.476181	0.282297	0.33832	0.732728	0.374285	0.579379	1.11973	-0.05745			-1.098	0.528424	-0.347766	0.049461	0.118801	0.142573	-0.253273	-0.107576	0.978628	-0.308365	0.66887	-0.120351
-0.0976		-0.21712	-0.28933	0.417638	-0.07007	-0.26431	-0.04993	-0.20152	2.39048	-0.32418	0.28835	-0.19465	0.208096	0.774735	0.408001	0.74973	0.46393	0.626862	-0.16249	0.331587	0.191052	0.128686	1.23056	0.242682	0.464423	0.203965	0.774191	0.486218	0.29135	0.345678	0.71907	0.397164	0.577515	1.13025	-0.06243			-1.0736	0.529926	-0.355144	0.0968577	0.110957	0.125667	-0.234749	-0.10089	1.01203	-0.266491	0.660487	-0.114325
-0.0732		-0.24702	-0.29967	0.384823	-0.09918	-0.25791	-0.00365	-0.24318	2.43879	-0.27634	0.306155	-0.16693	0.200561	0.777116	0.403802	0.753461	0.466168	0.637754	-0.14337	0.375472	0.205057	0.145285	1.2558	0.237695	0.453604	0.235262	0.798126	0.495942	0.303951	0.35183	0.701821	0.418867	0.579903	1.14359	-0.06616			-1.0492	0.526453	-0.369292	0.138098	0.0972777	0.11201	-0.199375	-0.0985705	1.04001	-0.235068	0.646655	-0.0978088
-0.0488		-0.27106	-0.30613	0.35271	-0.12158	-0.2473	0.044265	-0.28146	2.46548	-0.24865	0.323641	-0.1343	0.189498	0.770428	0.40911	0.755181	0.472287	0.65118	-0.12143	0.422946	0.214397	0.156619	1.28103	0.235761	0.44296	0.265842	0.820872	0.503715	0.318089	0.356591	0.683116	0.436672	0.58527	1.15983	-0.06606			-1.0248	0.517454	-0.393905	0.171825	0.0778352	0.10183	-0.151268	-0.100567	1.06176	-0.215659	0.627189	-0.0717866
-0.0244		-0.28902	-0.30726	0.319589	-0.13404	-0.23274	0.096227	-0.31502	2.46972	-0.25413	0.341764	-0.0973	0.173684	0.753292	0.423765	0.752955	0.481068	0.665361	-0.09697	0.471539	0.218833	0.162075	1.30353	0.236508	0.432435	0.294087	0.844195	0.508001	0.332308	0.360376	0.665796	0.448981	0.592672	1.17803	-0.06171			-1.0004	0.503735	-0.430015	0.197055	0.0527064	0.0951671	-0.0991265	-0.107062	1.07828	-0.209377	0.601774	-0.0387423
0		-0.30065	-0.30125	0.28628	-0.13479	-0.2145	0.15407	-0.34303	2.45604	-0.29167	0.360178	-0.05876	0.15356	0.729174	0.446612	0.746493	0.490638	0.678674	-0.0724	0.517513	0.219431	0.160219	1.32091	0.239006	0.421888	0.318345	0.870566	0.507449	0.345142	0.363617	0.652679	0.455191	0.60147	1.19686	-0.05616			-0.976	0.487129	-0.476071	0.212917	0.0230237	0.0925045	-0.0552999	-0.11822	1.09152	-0.213351	0.570327	-0.0020302
0.0244		-0.30636	-0.28791	0.256903	-0.12489	-0.19299	0.219439	-0.36527	2.43142	-0.35377	0.377737	-0.02197	0.1309	0.705003	0.476202	0.736661	0.498936	0.690132	-0.05115	0.55633	0.218097	0.149625	1.33203	0.242608	0.411172	0.337006	0.89951	0.501235	0.35472	0.366573	0.646138	0.455223	0.610382	1.21487	-0.05434			-0.9516	0.469336	-0.526953	0.217266	-0.00887726	0.0950863	-0.0336545	-0.133964	1.10373	-0.21682	0.533389	0.0348353
0.0488		-0.30754	-0.26888	0.237264	-0.10772	-0.1688	0.293071	-0.38196	2.40166	-0.4337	0.39369	0.010421	0.108091	0.686582	0.510705	0.724742	0.504191	0.699538	-0.03376	0.583419	0.216618	0.129472	1.33711	0.247247	0.400375	0.348534	0.925422	0.489497	0.35971	0.369109	0.647837	0.449846	0.617113	1.23052	-0.05895			-0.9272	0.451255	-0.573295	0.207559	-0.0401803	0.104342	-0.0442387	-0.153699	1.11742	-0.205138	0.492192	0.0685843
0.0732		-0.30596	-0.24582	0.231786	-0.0873	-0.14283	0.374228	-0.39348	2.37023	-0.52267	0.408474	0.035967	0.087829	0.675548	0.547294	0.711765	0.505462	0.707003	-0.01641	0.5948	0.215767	0.099916	1.33724	0.252951	0.389571	0.351866	0.941343	0.473437	0.360233	0.371085	0.658076	0.440938	0.619227	1.24257	-0.06826			-0.9028	0.433218	-0.605655	0.183434	-0.0683839	0.121187	-0.0869985	-0.176216	1.13415	-0.170615	0.448333	0.0962352
0.0976		-0.30278	-0.22032	0.239428	-0.06653	-0.11612	0.45941	-0.40013	2.33942	-0.60713	0.423593	0.053272	0.072443	0.670785	0.582139	0.697842	0.502327	0.712524	0.005586	0.589004	0.215047	0.062636	1.33368	0.25924	0.378554	0.346858	0.943817	0.455011	0.357512	0.372893	0.675217	0.430798	0.614891	1.25074	-0.07843			-0.8784	0.415483	-0.619486	0.147716	-0.091835	0.145929	-0.148793	-0.199872	1.15277	-0.119825	0.403277	0.115828
0.122		-0.29813	-0.19433	0.255269	-0.0465	-0.08982	0.541179	-0.40206	2.3117	-0.67304	0.44069	0.063158	0.063303	0.671153	0.61116	0.682399	0.494187	0.716147	0.032644	0.569294	0.213157	0.021103	1.3274	0.265049	0.367094	0.334416	0.933088	0.436486	0.352938	0.37525	0.696161	0.421431	0.602971	1.25589	-0.08663			-0.854	0.398418	-0.615861	0.106788	-0.110108	0.178544	-0.207535	-0.222969	1.16964	-0.0685179	0.357986	0.127547
0.1464		-0.29144	-0.17031	0.277625	-0.02763	-0.06531	0.610818	-0.39932	2.2877	-0.71343	0.460582	0.067732	0.061409	0.675794	0.630752	0.665109	0.480472	0.718166	0.060523	0.542967	0.208713	-0.02018	1.31903	0.269271	0.355196	0.316315	0.910051	0.420037	0.347517	0.379085	0.71761	0.41462	0.583406	1.25952	-0.09188			-0.8296	0.382426	-0.599914	0.0708597	-0.124027	0.218872	-0.243264	-0.244144	1.1809	-0.0291007	0.312931	0.134221
0.1708		-0.28217	-0.15287	0.308294	-0.01153	-0.04321	0.661446	-0.39242	2.26348	-0.73053	0.483071	0.06885	0.067953	0.683557	0.638428	0.646245	0.461133	0.718949	0.085005	0.518226	0.20083	-0.05717	1.30932	0.271491	0.342973	0.294848	0.874453	0.407323	0.342078	0.385324	0.736965	0.41216	0.557381	1.26309	-0.09336			-0.8052	0.367793	-0.578959	0.0499349	-0.134996	0.266143	-0.24718	-0.262355	1.18472	-0.00307231	0.268473	0.14036
0.1952		-0.27029	-0.14746	0.345174	-0.00125	-0.02205	0.686572	-0.3828	2.233	-0.72982	0.507376	0.066528	0.083528	0.693493	0.63376	0.626532	0.436703	0.718704	0.104752	0.50145	0.189216	-0.08756	1.29936	0.272295	0.330534	0.27245	0.826614	0.399056	0.337634	0.394107	0.752576	0.415065	0.526912	1.26775	-0.09072			-0.7808	0.354618	-0.559926	0.0467454	-0.143837	0.317915	-0.220053	-0.276609	1.18155	0.0165111	0.225255	0.150244
0.2196		-0.2563	-0.15669	0.380864	0.000506	0.002205	0.678446	-0.37244	2.19291	-0.71669	0.532478	0.057778	0.107005	0.70551	0.618819	0.60739	0.408528	0.717614	0.119896	0.49608	0.173551	-0.11138	1.28998	0.273	0.318267	0.251478	0.770425	0.394918	0.334875	0.404578	0.76385	0.42231	0.494549	1.27428	-0.08578			-0.7564	0.34313	-0.546424	0.0539661	-0.150234	0.370046	-0.166649	-0.286139	1.17188	0.0371318	0.18428	0.166991
0.244		-0.24077	-0.17891	0.408483	-0.00633	0.034432	0.629838	-0.36299	2.14436	-0.70074	0.557248	0.039324	0.135289	0.720412	0.597266	0.591058	0.379326	0.716249	0.131595	0.502845	0.153026	-0.13064	1.28109	0.275106	0.306866	0.234093	0.713627	0.3939	0.333252	0.415503	0.771171	0.431428	0.462889	1.28262	-0.07982			-0.732	0.334296	-0.538815	0.0582028	-0.1536	0.418303	-0.0968409	-0.290935	1.15555	0.0614144	0.146753	0.192195
0.2684		-0.22412	-0.20846	0.425169	-0.0187	0.077479	0.537174	-0.35488	2.09165	-0.69227	0.580628	0.012297	0.164121	0.739509	0.572636	0.580076	0.353126	0.715713	0.143387	0.520517	0.126765	-0.14815	1.27194	0.279734	0.296801	0.222124	0.66461	0.394747	0.331119	0.425788	0.775418	0.440408	0.43386	1.29161	-0.07056			-0.7076	0.329954	-0.537203	0.0483675	-0.15464	0.459666	-0.0272396	-0.291958	1.13414	0.088858	0.11384	0.225265
0.2928		-0.20652	-0.23673	0.432177	-0.03178	0.13043	0.403089	-0.34692	2.03992	-0.68914	0.60187	-0.01735	0.189604	0.764347	0.546991	0.576585	0.334052	0.717412	0.160205	0.546102	0.094397	-0.16578	1.26181	0.287204	0.287854	0.216839	0.628925	0.396401	0.326903	0.434419	0.777441	0.448288	0.408791	1.29937	-0.05508			-0.6832	0.332148	-0.542468	0.0228943	-0.155467	0.492112	0.0248077	-0.290938	1.11218	0.117706	0.0863053	0.263377
0.3172		-0.18772	-0.25568	0.434549	-0.04058	0.188625	0.23676	-0.33674	1.99302	-0.67729	0.620484	-0.04216	0.209429	0.796468	0.520602	0.581507	0.324784	0.722854	0.184395	0.574254	0.056478	-0.18345	1.2501	0.296797	0.279005	0.218668	0.608224	0.398379	0.319889	0.44033	0.777968	0.454534	0.388583	1.3045	-0.03485			-0.6588	0.342312	-0.55546	-0.0108161	-0.157467	0.514251	0.0472851	-0.28998	1.09598	0.141855	0.0642745	0.302253
0.3416		-0.16736	-0.26193	0.438422	-0.04156	0.243775	0.052312	-0.32175	1.95227	-0.64767	0.63583	-0.0558	0.222919	0.836704	0.492348	0.594105	0.325632	0.733593	0.211899	0.597689	0.015075	-0.19974	1.23616	0.306904	0.268678	0.227058	0.60069	0.400779	0.310245	0.442809	0.777881	0.458706	0.373017	1.30674	-0.01655			-0.6344	0.361004	-0.57477	-0.0443568	-0.15955	0.525949	0.0332096	-0.290922	1.09108	0.152914	0.0474081	0.337958
0.366		-0.14569	-0.25647	0.446276	-0.03486	0.284931	-0.13331	-0.30022	1.91633	-0.60503	0.646767	-0.05494	0.23002	0.883872	0.460508	0.612705	0.334746	0.750968	0.233638	0.610212	-0.02635	-0.21313	1.21972	0.315693	0.255459	0.240588	0.601348	0.403882	0.298849	0.441723	0.778294	0.460931	0.360996	1.30698	-0.00593			-0.61	0.388116	-0.593999	-0.074186	-0.159123	0.529107	-0.0205541	-0.294685	1.09928	0.14829	0.0351707	0.36883
0.3904		-0.12422	-0.2415	0.45696	-0.02493	0.302129	-0.30313	-0.27206	1.88255	-0.56238	0.651904	-0.04008	0.23044	0.933384	0.423932	0.635581	0.349404	0.775665	0.242125	0.609364	-0.06348	-0.22267	1.2009	0.32209	0.23902	0.257455	0.602942	0.407688	0.286791	0.437192	0.780076	0.46228	0.35192	1.3068	-0.00124			-0.5856	0.422972	-0.604035	-0.0993708	-0.154537	0.527416	-0.111352	-0.301182	1.11832	0.132502	0.0267802	0.395285
0.4148		-0.10516	-0.22038	0.469887	-0.01828	0.290455	-0.44317	-0.23894	1.85022	-0.53388	0.650368	-0.01332	0.224059	0.977891	0.38287	0.660988	0.367685	0.807624	0.235813	0.595453	-0.09141	-0.22805	1.17968	0.326505	0.220589	0.276108	0.599207	0.411748	0.27468	0.429917	0.783301	0.463907	0.34572	1.30787	0.003193			-0.5612	0.464044	-0.598979	-0.118121	-0.146465	0.525074	-0.229758	-0.309879	1.145	0.111359	0.0209528	0.418043
0.4392		-0.09036	-0.19857	0.484375	-0.01978	0.250949	-0.54486	-0.20368	1.82213	-0.53021	0.642375	0.024269	0.211802	1.01034	0.338629	0.687017	0.389288	0.846216	0.217613	0.569843	-0.10602	-0.22965	1.1556	0.33066	0.202175	0.295699	0.588582	0.415459	0.262459	0.421975	0.787315	0.466148	0.342109	1.31144	0.007882			-0.5368	0.508766	-0.579777	-0.130016	-0.137624	0.525331	-0.361516	-0.320402	1.17774	0.0881561	0.0159766	0.437507
0.4636		-0.0805	-0.18208	0.4956	-0.03037	0.188536	-0.60652	-0.16943	1.80238	-0.5524	0.6292	0.071179	0.195583	1.02611	0.292603	0.711405	0.414682	0.89012	0.192252	0.535208	-0.10637	-0.22844	1.1281	0.336728	0.185186	0.31611	0.574802	0.418526	0.249835	0.416213	0.791347	0.468986	0.340684	1.31803	0.005984			-0.5124	0.553956	-0.553503	-0.138508	-0.131692	0.529333	-0.490199	-0.332571	1.21724	0.0642274	0.0103933	0.453818
0.488		-0.07482	-0.17482	0.495551	-0.04734	0.109692	-0.63203	-0.13859	1.79397	-0.58774	0.612895	0.123707	0.177396	1.02285	0.245652	0.731529	0.44359	0.937059	0.165487	0.495376	-0.09568	-0.22549	1.09718	0.346624	0.170062	0.337442	0.564136	0.421005	0.236842	0.414635	0.795063	0.472909	0.341184	1.32769	-0.01004			-0.488	0.596844	-0.529283	-0.147237	-0.131867	0.535523	-0.601665	-0.34602	1.26542	0.0407148	0.00382041	0.465861
0.5124		-0.07139	-0.17605	0.477783	-0.06646	0.021351	-0.62633	-0.11232	1.79754	-0.61554	0.595982	0.177024	0.158288	1.00049	0.198216	0.745358	0.474574	0.983936	0.142595	0.453398	-0.07929	-0.22143	1.06362	0.361403	0.156759	0.359375	0.560628	0.422896	0.224031	0.417665	0.798557	0.478915	0.343145	1.34022	-0.03999			-0.4636	0.635933	-0.514837	-0.15543	-0.139343	0.540127	-0.689486	-0.35998	1.32242	0.0178146	-0.0029123	0.47087
0.5368		-0.06757	-0.17957	0.440817	-0.08432	-0.06988	-0.59316	-0.0906	1.81055	-0.6214	0.580916	0.227281	0.137776	0.962064	0.151111	0.752042	0.506011	1.02744	0.126235	0.409984	-0.06164	-0.21601	1.02873	0.380805	0.144875	0.380934	0.563904	0.4238	0.212539	0.424227	0.801879	0.4878	0.345294	1.35478	-0.07377			-0.4392	0.67095	-0.51428	-0.16032	-0.153086	0.538431	-0.755846	-0.373314	1.38436	-0.00733098	-0.0084784	0.465424
0.5612		-0.06069	-0.17659	0.391124	-0.09916	-0.15888	-0.53929	-0.07284	1.82908	-0.60635	0.569298	0.272566	0.114525	0.913354	0.105963	0.751359	0.537128	1.06477	0.116942	0.363996	-0.04502	-0.20835	0.993589	0.403787	0.133713	0.400575	0.572061	0.423094	0.204238	0.431932	0.804701	0.500015	0.345621	1.36966	-0.09766			-0.4148	0.702042	-0.526389	-0.16313	-0.171225	0.525857	-0.80655	-0.384714	1.44519	-0.0394827	-0.0119344	0.445978
0.5856		-0.04912	-0.16035	0.343811	-0.111	-0.24252	-0.47751	-0.05836	1.85126	-0.58205	0.56127	0.31208	0.08809	0.859771	0.064463	0.743398	0.567934	1.09411	0.114345	0.314657	-0.03052	-0.19799	0.958425	0.429662	0.122748	0.416445	0.583591	0.420418	0.201267	0.437876	0.806364	0.516178	0.342202	1.38285	-0.10334			-0.3904	0.729176	-0.545985	-0.168547	-0.191994	0.499157	-0.844746	-0.393189	1.49982	-0.0834231	-0.0131136	0.409705
0.61		-0.03297	-0.13052	0.314985	-0.12128	-0.31876	-0.42216	-0.04653	1.87807	-0.5605	0.555338	0.344815	0.059444	0.803402	0.027333	0.728735	0.598661	1.11484	0.116874	0.263828	-0.01847	-0.18565	0.922805	0.458293	0.111834	0.426936	0.596152	0.415894	0.205034	0.439812	0.806115	0.536851	0.333778	1.39255	-0.09186			-0.366	0.752266	-0.566768	-0.177937	-0.213516	0.458138	-0.868985	-0.39835	1.54527	-0.142464	-0.012404	0.356537
0.6344		-0.01418	-0.09592	0.312308	-0.13153	-0.3855	-0.38289	-0.03613	1.91085	-0.55105	0.54863	0.369385	0.029596	0.744314	-0.00578	0.708449	0.629567	1.12756	0.122552	0.21621	-0.00825	-0.173	0.886415	0.489289	0.100946	0.431266	0.606525	0.409898	0.215472	0.436655	0.803601	0.561372	0.320099	1.39736	-0.0708			-0.3416	0.771536	-0.582203	-0.186911	-0.23364	0.406114	-0.875804	-0.400201	1.58043	-0.214155	-0.0101974	0.290044
0.6588		0.004065	-0.07135	0.334381	-0.14191	-0.44016	-0.36348	-0.02502	1.94823	-0.56148	0.537713	0.385024	-0.00122	0.684163	-0.03541	0.684226	0.660834	1.13395	0.131051	0.176997	0.001389	-0.16112	0.849746	0.521477	0.090162	0.429663	0.611188	0.402747	0.230603	0.428161	0.799391	0.587461	0.302378	1.39645	-0.04839			-0.3172	0.787397	-0.585338	-0.190396	-0.250299	0.348202	-0.860968	-0.39895	1.60606	-0.289738	-0.00642051	0.21642
0.6832		0.01821	-0.06751	0.374965	-0.15123	-0.48038	-0.3638	-0.01066	1.98528	-0.59523	0.519941	0.392477	-0.03292	0.626883	-0.06109	0.65852	0.692508	1.13627	0.144194	0.149804	0.011781	-0.14882	0.81417	0.553323	0.07977	0.423259	0.606748	0.394637	0.246445	0.414212	0.794851	0.612906	0.283008	1.38964	-0.03007			-0.2928	0.799945	-0.57145	-0.187802	-0.262254	0.289587	-0.818641	-0.395079	1.62469	-0.360204	-0.000301166	0.143366
0.7076		0.025602	-0.08305	0.424371	-0.1579	-0.50507	-0.37916	0.00878	2.0152	-0.64758	0.494766	0.393304	-0.06495	0.576068	-0.0808	0.633791	0.724517	1.13652	0.164059	0.136621	0.023612	-0.1333	0.781588	0.583725	0.069681	0.413905	0.593026	0.385838	0.25778	0.394469	0.791419	0.637336	0.264417	1.37694	-0.01947			-0.2684	0.808682	-0.54428	-0.18304	-0.269413	0.235188	-0.743821	-0.389388	1.63923	-0.420308	0.00944522	0.0786502
0.732		0.025498	-0.10811	0.469513	-0.16106	-0.51501	-0.39739	0.033741	2.03322	-0.70758	0.464282	0.3887	-0.09559	0.532694	-0.0917	0.611052	0.75644	1.13578	0.190673	0.137573	0.036299	-0.11246	0.75405	0.612278	0.058961	0.403843	0.575287	0.37693	0.260348	0.368962	0.790192	0.661718	0.24829	1.35798	-0.01937			-0.244	0.812748	-0.516331	-0.181595	-0.271653	0.189707	-0.636442	-0.382789	1.65216	-0.468532	0.0239132	0.0278829
0.7564		0.019051	-0.13334	0.497859	-0.16086	-0.51266	-0.39936	0.063214	2.03954	-0.76661	0.432543	0.380102	-0.12151	0.49532	-0.09146	0.589648	0.787629	1.13405	0.222259	0.149292	0.048606	-0.08654	0.733108	0.638811	0.046565	0.39518	0.561314	0.368855	0.253484	0.338425	0.791937	0.686807	0.235513	1.33229	-0.02988			-0.2196	0.811428	-0.49925	-0.187852	-0.267706	0.157197	-0.502642	-0.375912	1.66616	-0.505493	0.0432962	-0.00625149
0.7808		0.008352	-0.15342	0.50427	-0.15786	-0.50127	-0.36647	0.095324	2.03915	-0.82367	0.403875	0.370333	-0.13916	0.461909	-0.07895	0.568675	0.818095	1.13067	0.257548	0.164546	0.060008	-0.05801	0.719057	0.662871	0.032289	0.389361	0.557494	0.36271	0.240441	0.303672	0.796989	0.712605	0.226437	1.29989	-0.04681			-0.1952	0.804456	-0.497037	-0.203535	-0.256512	0.140719	-0.354834	-0.368966	1.68388	-0.530845	0.0665724	-0.0231109
0.8052		-0.00462	-0.16613	0.493256	-0.15211	-0.48413	-0.2896	0.12803	2.03911	-0.88155	0.381125	0.36317	-0.14659	0.431297	-0.05431	0.548295	0.848904	1.12495	0.295972	0.174913	0.070936	-0.02987	0.710895	0.683771	0.016928	0.386964	0.567037	0.359313	0.225949	0.265626	0.805122	0.738791	0.221122	1.26182	-0.06341			-0.1708	0.792032	-0.508965	-0.228954	-0.239471	0.14209	-0.208828	-0.361942	1.7058	-0.542443	0.0915964	-0.0240636
0.8296		-0.01866	-0.17171	0.474587	-0.14273	-0.46453	-0.1711	0.159467	2.04486	-0.9413	0.364743	0.362608	-0.14344	0.403117	-0.01868	0.530115	0.881347	1.11693	0.33471	0.174678	0.081648	-0.00372	0.706785	0.700946	0.001973	0.387933	0.58991	0.358737	0.213487	0.226284	0.815848	0.764853	0.219309	1.22008	-0.07479			-0.1464	0.775012	-0.533848	-0.264927	-0.220177	0.161275	-0.0756477	-0.354875	1.72932	-0.539894	0.115732	-0.012734
0.854		-0.03343	-0.17185	0.458676	-0.12909	-0.44547	-0.02106	0.187995	2.05819	-0.99811	0.352944	0.372681	-0.13033	0.376846	0.026096	0.516965	0.915957	1.10757	0.36757	0.162943	0.09152	0.020048	0.704346	0.714109	-0.01095	0.39186	0.62329	0.360082	0.204019	0.188761	0.828786	0.789768	0.220479	1.17711	-0.08048			-0.122	0.755419	-0.569827	-0.309686	-0.202101	0.196263	0.0430287	-0.347995	1.75033	-0.527404	0.136818	0.00641988
0.8784		-0.04902	-0.16844	0.455514	-0.11235	-0.42913	0.146187	0.212139	2.07872	-1.04118	0.342833	0.396092	-0.10932	0.351228	0.077467	0.511854	0.952488	1.09827	0.387908	0.142833	0.099816	0.041236	0.701054	0.723253	-0.02073	0.398048	0.660235	0.361673	0.196293	0.156118	0.84358	0.812004	0.224187	1.13566	-0.08302			-0.0976	0.736672	-0.613276	-0.355036	-0.186562	0.243993	0.150152	-0.341577	1.7655	-0.51226	0.153788	0.0299312
0.9028		-0.06533	-0.16221	0.472012	-0.09585	-0.41657	0.314706	0.230567	2.10574	-1.06196	0.331726	0.431766	-0.0839	0.324389	0.13201	0.515985	0.990334	1.09023	0.391891	0.119701	0.106393	0.059723	0.694977	0.728735	-0.02698	0.405653	0.689942	0.361681	0.188498	0.130324	0.859476	0.829662	0.230113	1.09862	-0.08455			-0.0732	0.722973	-0.659565	-0.39029	-0.171953	0.301578	0.246903	-0.335738	1.77406	-0.500214	0.166797	0.0552224
0.9272		-0.08193	-0.15115	0.505349	-0.08467	-0.40863	0.470004	0.242267	2.13729	-1.06196	0.317664	0.474977	-0.0574	0.294522	0.185887	0.527488	1.02855	1.08414	0.380158	0.100102	0.111473	0.075528	0.685201	0.731189	-0.02967	0.4138	0.70297	0.35887	0.180089	0.112177	0.875206	0.840928	0.237799	1.06872	-0.08403			-0.0488	0.718025	-0.704371	-0.408652	-0.155217	0.367051	0.330735	-0.33064	1.77788	-0.492252	0.177035	0.0792839
0.9516		-0.09814	-0.13165	0.542838	-0.0842	-0.4065	0.601677	0.246805	2.16869	-1.0506	0.299423	0.520421	-0.03214	0.260591	0.235807	0.542516	1.06584	1.07994	0.357439	0.090165	0.11545	0.088321	0.671485	0.731212	-0.02889	0.42145	0.697044	0.353198	0.171876	0.101895	0.889467	0.845153	0.246383	1.04811	-0.078			-0.0244	0.723961	-0.744659	-0.408367	-0.134627	0.439238	0.397096	-0.326648	1.77986	-0.486637	0.186257	0.0985572
0.976		-0.11335	-0.104	0.571558	-0.09743	-0.41068	0.704482	0.244308	2.19464	-1.03907	0.276799	0.564118	-0.00945	0.223246	0.279534	0.557496	1.10091	1.07655	0.330272	0.09274	0.118657	0.09705	0.653765	0.729094	-0.02506	0.427392	0.678352	0.345943	0.164605	0.099283	0.901273	0.843303	0.254531	1.03805	-0.06272			0	0.741055	-0.77767	-0.392082	-0.111078	0.517305	0.442824	-0.323948	1.78194	-0.481599	0.196295	0.110427
1.0004		-0.12753	-0.07626	0.586028	-0.12302	-0.41972	0.776849	0.235325	2.2128	-1.03788	0.250827	0.603014	0.010279	0.185617	0.315508	0.570144	1.13252	1.07208	0.305077	0.105525	0.120917	0.09997	0.632239	0.724693	-0.01902	0.43058	0.656314	0.339149	0.158328	0.103259	0.909779	0.836867	0.260833	1.0387	-0.03673			0.0244	0.767919	-0.797846	-0.365467	-0.0874743	0.600713	0.468741	-0.321933	1.78502	-0.474791	0.208882	0.114647
1.0248		-0.14142	-0.06145	0.589022	-0.15618	-0.43024	0.819407	0.220766	2.22555	-1.05382	0.223198	0.634454	0.026744	0.152009	0.342174	0.57882	1.15931	1.06444	0.286628	0.12201	0.12162	0.095303	0.60782	0.717349	-0.01191	0.430575	0.636525	0.334802	0.152938	0.112018	0.914228	0.826701	0.264452	1.04911	-0.00484			0.0488	0.801666	-0.79741	-0.333149	-0.0671392	0.68914	0.479783	-0.319063	1.79032	-0.464661	0.225475	0.113044
1.0492		-0.15622	-0.06965	0.588361	-0.19107	-0.43739	0.836419	0.201823	2.23891	-1.086	0.195225	0.656089	0.038674	0.125163	0.358025	0.581824	1.1802	1.05191	0.276196	0.134701	0.120232	0.082805	0.582482	0.705853	-0.00492	0.427756	0.619274	0.33438	0.14834	0.124444	0.914245	0.812878	0.265171	1.06724	0.022107			0.0732	0.838128	-0.773118	-0.297411	-0.05199	0.781884	0.483873	-0.31353	1.79971	-0.453112	0.246669	0.107716
1.0736		-0.17284	-0.10167	0.592519	-0.22303	-0.43554	0.837718	0.179903	2.25826	-1.12844	0.167365	0.666035	0.044512	0.104638	0.362515	0.577943	1.19486	1.03338	0.2714	0.138086	0.116741	0.064889	0.559256	0.688737	0.00134	0.423191	0.601741	0.338729	0.144231	0.141025	0.909963	0.794954	0.263107	1.09017	0.035143			0.0976	0.872647	-0.731534	-0.260639	-0.0414253	0.87748	0.488539	-0.304193	1.81447	-0.444265	0.271647	0.0996733
1.098		-0.19133	-0.1491	0.606465	-0.24919	-0.41998	0.836231	0.156553	2.28474	-1.17499	0.139662	0.664239	0.044226	0.087141	0.356826	0.567478	1.20334	1.00835	0.268177	0.129632	0.111761	0.04585	0.541699	0.664978	0.007279	0.418368	0.581341	0.347849	0.14031	0.162925	0.90203	0.772873	0.258959	1.11467	0.033342			0.122	0.901306	-0.686222	-0.225096	-0.0330859	0.97388	0.494858	-0.290945	1.83453	-0.441908	0.298482	0.0891237
1.1224		-0.2105	-0.19884	0.628569	-0.26833	-0.38878	0.840858	0.133192	2.31546	-1.21804	0.112441	0.654382	0.039588	0.068548	0.343738	0.552268	1.20515	0.976816	0.263497	0.109368	0.106302	0.030046	0.532879	0.634567	0.013962	0.414897	0.560244	0.360585	0.136687	0.190311	0.891617	0.747894	0.254039	1.13804	0.021032			0.1464	0.921859	-0.65048	-0.191884	-0.0250022	1.06881	0.497516	-0.274602	1.85854	-0.448511	0.32492	0.0767609
																																						0.1708	0.933961	-0.631685	-0.163541	-0.0160103	1.1602	0.49352	-0.256827	1.88511	-0.465238	0.348765	0.0646015
																																						0.1952	0.938861	-0.629387	-0.14535	-0.00454931	1.24682	0.486869	-0.239904	1.91385	-0.491949	0.368137	0.0551199
																																						0.2196	0.938692	-0.637524	-0.142026	0.0109521	1.32875	0.483323	-0.225992	1.94421	-0.526511	0.382106	0.0494747
																																						0.244	0.935582	-0.64877	-0.155315	0.0310663	1.4072	0.484674	-0.216207	1.97374	-0.564102	0.391063	0.0469912
																																						0.2684	0.930898	-0.658329	-0.184675	0.0558862	1.48371	0.490362	-0.210398	1.99941	-0.597435	0.396494	0.0463818
																																						0.2928	0.92484	-0.665642	-0.22704	0.085539	1.55895	0.502044	-0.207689	2.02059	-0.621919	0.400626	0.0472041
																																						0.3172	0.916504	-0.672738	-0.276303	0.119851	1.63222	0.523713	-0.206938	2.03909	-0.642794	0.406062	0.0499385
																																						0.3416	0.904318	-0.682399	-0.326438	0.158184	1.70232	0.558237	-0.206842	2.05655	-0.670082	0.415103	0.0545954
																																						0.366	0.886702	-0.698346	-0.375519	0.199025	1.76921	0.604035	-0.206071	2.07311	-0.706502	0.429059	0.0593011
																																						0.3904	0.862683	-0.723234	-0.424447	0.23922	1.83447	0.653538	-0.203524	2.0876	-0.747401	0.448135	0.0605115
																																						0.4148	0.832197	-0.754575	-0.473146	0.274586	1.89998	0.696146	-0.198566	2.09815	-0.788301	0.471821	0.0549402
																																						0.4392	0.796038	-0.78483	-0.519435	0.301791	1.96601	0.724552	-0.191231	2.10348	-0.826427	0.499312	0.040824
																																						0.4636	0.755586	-0.806654	-0.55809	0.318872	2.02995	0.736604	-0.182529	2.10408	-0.85666	0.529869	0.0172242
																																						0.488	0.712401	-0.81729	-0.581044	0.324262	2.08658	0.731048	-0.174575	2.10214	-0.868021	0.562996	-0.0164838
																																						0.5124	0.667843	-0.818341	-0.582576	0.316822	2.12958	0.706736	-0.170023	2.10042	-0.846299	0.598048	-0.0601063
																																						0.5368	0.622866	-0.813386	-0.565123	0.297198	2.15286	0.666809	-0.171092	2.10087	-0.783699	0.63319	-0.112138
																																						0.5612	0.578199	-0.806663	-0.539408	0.269011	2.15138	0.618147	-0.178938	2.10369	-0.686921	0.664813	-0.169227
																																						0.5856	0.534986	-0.802372	-0.518887	0.238216	2.12221	0.566484	-0.193402	2.10835	-0.574709	0.688601	-0.227349
																																						0.61	0.495333	-0.803942	-0.513268	0.210321	2.06564	0.515868	-0.212854	2.11527	-0.467423	0.701669	-0.284868
																																						0.6344	0.462033	-0.814205	-0.525955	0.187871	1.98552	0.471698	-0.234391	2.12481	-0.379533	0.703882	-0.342963
																																						0.6588	0.437795	-0.835525	-0.554746	0.170601	1.88879	0.440518	-0.254516	2.13518	-0.318149	0.697472	-0.402974
																																						0.6832	0.4249	-0.868394	-0.592723	0.157308	1.78405	0.426021	-0.270127	2.14326	-0.281978	0.685822	-0.464632
																																						0.7076	0.425087	-0.910707	-0.631127	0.14673	1.68017	0.425334	-0.279417	2.14712	-0.261909	0.67256	-0.525592
																																						0.732	0.43904	-0.959658	-0.664976	0.1374	1.58539	0.429176	-0.282276	2.14673	-0.245911	0.660958	-0.581395
																																						0.7564	0.465905	-1.0131	-0.69505	0.128102	1.50663	0.428067	-0.280071	2.14309	-0.224077	0.653089	-0.627524
																																						0.7808	0.503642	-1.06831	-0.723859	0.11809	1.44836	0.420684	-0.275073	2.13661	-0.191154	0.649173	-0.662498
																																						0.8052	0.550059	-1.12114	-0.752292	0.106686	1.4115	0.415928	-0.269806	2.1269	-0.147687	0.647759	-0.687925
																																						0.8296	0.603398	-1.16705	-0.779313	0.0939205	1.39324	0.425236	-0.26635	2.11483	-0.100572	0.646649	-0.70621
																																						0.854	0.661858	-1.20311	-0.80188	0.0814651	1.38813	0.451562	-0.265929	2.10382	-0.0602775	0.644062	-0.719637
																																						0.8784	0.722868	-1.22939	-0.816113	0.0717843	1.39043	0.486485	-0.269062	2.09786	-0.0335256	0.63943	-0.730408
																																						0.9028	0.783249	-1.24924	-0.81973	0.0662375	1.39662	0.518613	-0.275796	2.09798	-0.0193486	0.633209	-0.740241
																																						0.9272	0.840142	-1.26904	-0.813129	0.0642843	1.40592	0.543488	-0.285781	2.10128	-0.0135734	0.625963	-0.750588
																																						0.9516	0.891589	-1.29486	-0.799052	0.0643923	1.41878	0.565407	-0.298351	2.10327	-0.0137956	0.617957	-0.763514
																																						0.976	0.936261	-1.32635	-0.780425	0.0655155	1.43491	0.59146	-0.312563	2.10081	-0.0197903	0.609624	-0.781442
																																						1.0004	0.973109	-1.35654	-0.756527	0.0679146	1.45278	0.62532	-0.327238	2.09317	-0.0329765	0.601959	-0.805431
																																						1.0248	1.0015	-1.37875	-0.723202	0.0731398	1.47061	0.66634	-0.341129	2.08146	-0.0540422	0.596347	-0.834118
																																						1.0492	1.0214	-1.39089	-0.679457	0.083493	1.48723	0.711809	-0.353123	2.06751	-0.0782901	0.594107	-0.864275
																																						1.0736	1.03328	-1.39387	-0.631415	0.101026	1.50176	0.75823	-0.362438	2.05334	-0.0952928	0.595943	-0.891548
																																						1.098	1.03807	-1.38988	-0.587623	0.126044	1.51305	0.799608	-0.368807	2.04155	-0.0953938	0.601722	-0.911206
																																						1.1224	1.03727	-1.38242	-0.552364	0.156066	1.51971	0.826085	-0.372455	2.03522	-0.0762693	0.610944	-0.919643
																																						1.1468	1.03296	-1.37355	-0.523989	0.186037	1.52023	0.828883	-0.374045	2.03674	-0.0417213	0.623361	-0.915282
																																						1.1712	1.02768	-1.36112	-0.497341	0.209614	1.51255	0.806865	-0.374764	2.04775	0.00362079	0.639045	-0.898156
																																						1.1956	1.02444	-1.34246	-0.467332	0.222066	1.4948	0.766632	-0.375886	2.06927	0.0557039	0.65777	-0.869907
																																						1.22	1.02653	-1.31835	-0.433399	0.223233	1.46644	0.717684	-0.377757	2.09995	0.112085	0.678282	-0.834122
																																						1.2444	1.03696	-1.29145	-0.401844	0.216786	1.42834	0.6675	-0.379425	2.13509	0.174271	0.698005	-0.795024
																																						1.2688	1.05771	-1.26324	-0.382188	0.206866	1.38159	0.619243	-0.379219	2.16901	0.243485	0.713415	-0.756287
																																						1.2932	1.08939	-1.23326	-0.381842	0.195886	1.32726	0.572364	-0.37539	2.19834	0.313603	0.720976	-0.722023
																																						1.3176	1.13135	-1.20037	-0.403054	0.183938	1.26691	0.524851	-0.366586	2.22247	0.373325	0.717842	-0.697144
																																						1.342	1.18134	-1.16437	-0.441622	0.169221	1.20269	0.476513	-0.352306	2.24232	0.414229	0.70172	-0.685671
																																						1.3664	1.23522	-1.12629	-0.490575	0.149441	1.13717	0.431579	-0.332994	2.25958	0.43476	0.670673	-0.689316
																																						1.3908	1.28736	-1.08761	-0.547009	0.123312	1.07378	0.397149	-0.30966	2.27627	0.43934	0.6238	-0.706963
																																						1.4152	1.33177	-1.05065	-0.611397	0.0905539	1.01696	0.377697	-0.28331	2.29406	0.433564	0.562368	-0.734638
																																						1.4396	1.36369	-1.01903	-0.680043	0.0510227	0.970873	0.371134	-0.254656	2.31399	0.417825	0.490084	-0.766563
																																						1.464	1.38068	-0.996441	-0.743251	0.00530121	0.938058	0.370432	-0.224339	2.33618	0.388837	0.412004	-0.797327
																																						1.4884	1.38278	-0.984937	-0.790754	-0.0445123	0.919289	0.369002	-0.1933	2.35934	0.349328	0.333011	-0.823627
																																						1.5128	1.3716	-0.984382	-0.816873	-0.0958014	0.914654	0.364687	-0.162845	2.38076	0.310509	0.257001	-0.844264
																																						1.5372	1.34946	-0.99234	-0.821849	-0.146106	0.9242	0.358939	-0.134457	2.39713	0.284689	0.186943	-0.859329
																																						1.5616	1.31886	-1.00492	-0.810665	-0.192725	0.947259	0.353062	-0.109726	2.40618	0.280762	0.125077	-0.869917
																																						1.586	1.28232	-1.01896	-0.791745	-0.233208	0.981566	0.345705	-0.0904047	2.40725	0.304088	0.0726592	-0.877661
																																						1.6104	1.24237	-1.03361	-0.773487	-0.266205	1.02341	0.3329	-0.0782125	2.39931	0.353082	0.0294807	-0.883402
																																						1.6348	1.20145	-1.04978	-0.759656	-0.291336	1.06832	0.310256	-0.0743122	2.37949	0.41492	-0.00592853	-0.886554
																																						1.6592	1.16175	-1.06722	-0.750739	-0.308794	1.11165	0.27582	-0.0787819	2.34527	0.470489	-0.0354262	-0.8858
																																						1.6836	1.12501	-1.08179	-0.74828	-0.319145	1.14922	0.230075	-0.0903914	2.29707	0.505692	-0.0607173	-0.879922
																																						1.708	1.09255	-1.08701	-0.75379	-0.322981	1.17782	0.173618	-0.106814	2.2377	0.516942	-0.0834179	-0.868603
																																						1.7324	1.06518	-1.07952	-0.7653	-0.320789	1.19567	0.106625	-0.125238	2.17096	0.510019	-0.105273	-0.852722
																																						1.7568	1.04308	-1.06305	-0.777283	-0.313418	1.20265	0.0311912	-0.143082	2.10135	0.496785	-0.128363	-0.833507
																																						1.7812	1.02563	-1.04611	-0.783291	-0.302293	1.2002	-0.0461258	-0.158491	2.03351	0.489516	-0.155041	-0.811895
																																						1.8056	1.01193	-1.03541	-0.780324	-0.289121	1.19052	-0.115895	-0.170508	1.9715	0.493673	-0.187243	-0.78872
																																						1.83	1.00159	-1.03292	-0.771713	-0.275915	1.17554	-0.171272	-0.178954	1.91874	0.504843	-0.225603	-0.764654
																																						1.8544	0.994844	-1.0378	-0.764021	-0.265199	1.15642	-0.211502	-0.184153	1.87814	0.51422	-0.269095	-0.740291
																																						1.8788	0.99174	-1.04807	-0.761376	-0.259618	1.13392	-0.241246	-0.186609	1.85154	0.516741	-0.315397	-0.716856
																																						1.9032	0.991255	-1.06064	-0.76293	-0.261185	1.1089	-0.266857	-0.186675	1.83862	0.512246	-0.361816	-0.695966
																																						1.9276	0.991004	-1.07215	-0.764233	-0.270913	1.08239	-0.291538	-0.184322	1.83665	0.500972	-0.406482	-0.678214
																																						1.952	0.987442	-1.08127	-0.761486	-0.28913	1.05506	-0.314584	-0.179112	1.84189	0.480921	-0.44911	-0.662588
																																						1.9764	0.976342	-1.09008	-0.755159	-0.315729	1.02624	-0.33563	-0.170172	1.85146	0.449963	-0.49068	-0.647214
																																						2.0008	0.953926	-1.10338	-0.747841	-0.34973	0.994081	-0.35686	-0.156442	1.86405	0.410201	-0.532229	-0.630515
																																						2.0252	0.918338	-1.12649	-0.738542	-0.38876	0.957196	-0.37965	-0.13733	1.88018	0.368949	-0.573832	-0.611895
																																						2.0496	0.870328	-1.16041	-0.722386	-0.428914	0.916159	-0.400375	-0.113114	1.90209	0.334638	-0.614696	-0.591574
																																						2.074	0.812782	-1.19927	-0.69594	-0.464918	0.873489	-0.411927	-0.0850104	1.93216	0.312347	-0.654026	-0.570244
																																						2.0984	0.749945	-1.23334	-0.659557	-0.491546	0.83298	-0.409872	-0.0549899	1.97152	0.301801	-0.691518	-0.548981
																																						2.1228	0.686842	-1.25376	-0.615251	-0.506537	0.799292	-0.395646	-0.0249068	2.02079	0.297277	-0.726975	-0.529518
																																						2.1472	0.628189	-1.25597	-0.56611	-0.511805	0.777575	-0.375457	0.00444593	2.08034	0.289605	-0.759599	-0.514019
																																						2.1716	0.576537	-1.24105	-0.517841	-0.510996	0.77274	-0.357674	0.0332277	2.14954	0.270986	-0.787677	-0.503568
																																						2.196	0.531103	-1.21457	-0.477521	-0.506703	0.788596	-0.348792	0.0616808	2.22695	0.239429	-0.809202	-0.496827
																																						2.2204	0.488465	-1.18436	-0.45023	-0.500228	0.827499	-0.349718	0.0896847	2.31102	0.197701	-0.823123	-0.490121
																																						2.2448	0.444501	-1.1567	-0.437042	-0.492778	0.890662	-0.354457	0.117322	2.40035	0.149738	-0.830023	-0.478916
																																						2.2692	0.396159	-1.13278	-0.434157	-0.486083	0.978664	-0.352379	0.145672	2.49375	0.101671	-0.831809	-0.460098
																																						2.2936	0.342296	-1.11039	-0.433955	-0.481976	1.09112	-0.333801	0.176614	2.59031	0.0632955	-0.831074	-0.433042
																																						2.318	0.283551	-1.08753	-0.429095	-0.481809	1.22516	-0.294292	0.211834	2.68919	0.0420109	-0.830457	-0.398592
																																						2.3424	0.221622	-1.06213	-0.417047	-0.48609	1.3745	-0.235978	0.252233	2.78934	0.03654	-0.832045	-0.35752
																																						2.3668	0.158514	-1.03197	-0.401412	-0.493671	1.53082	-0.168359	0.297996	2.88878	0.0402828	-0.837129	-0.310009
																																						2.3912	0.0962108	-0.997895	-0.38879	-0.500981	1.68692	-0.106103	0.348726	2.98456	0.0502081	-0.846297	-0.256567
																																						2.4156	0.0369334	-0.965546	-0.382946	-0.502888	1.83937	-0.0611665	0.403355	3.07454	0.0719915	-0.859496	-0.199127
																																						2.44	-0.0163562	-0.943385	-0.381203	-0.494217	1.98945	-0.0357802	0.460189	3.15946	0.115998	-0.875814	-0.140113
																																						2.4644	-0.0599329	-0.938725	-0.378182	-0.470274	2.14272	-0.0226813	0.517185	3.24382	0.187705	-0.893241	-0.0803241
																																						2.4888	-0.0900268	-0.953316	-0.371597	-0.427498	2.30768	-0.00901127	0.572213	3.33415	0.28252	-0.908934	-0.0189923
																																						2.5132	-0.103622	-0.98232	-0.360291	-0.364615	2.49403	0.0199933	0.623164	3.43655	0.38952	-0.92	0.044326
																																						2.5376	-0.0988618	-1.01859	-0.340133	-0.283133	2.7113	0.0765947	0.668045	3.55565	0.498648	-0.924235	0.109061
																																						2.562	-0.075206	-1.05678	-0.307557	-0.187468	2.96759	0.167279	0.705085	3.69424	0.60293	-0.92016	0.174348
																																						2.5864	-0.0333459	-1.09296	-0.264195	-0.0845937	3.26767	0.292202	0.732952	3.85269	0.695313	-0.906618	0.239829
																																						2.6108	0.025158	-1.12303	-0.214309	0.0174097	3.61108	0.446102	0.751272	4.02926	0.766232	-0.882949	0.306
																																						2.6352	0.0982221	-1.14336	-0.160767	0.111093	3.9911	0.621571	0.761012	4.2211	0.804853	-0.84989	0.373668
																																						2.6596	0.183247	-1.15193	-0.10639	0.191124	4.39581	0.812294	0.76427	4.42407	0.802495	-0.81003	0.442743
																																						2.684	0.276858	-1.14861	-0.0553804	0.255309	4.81094	1.01233	0.763699	4.63205	0.756556	-0.767303	0.511807
																																						2.7084	0.374792	-1.13544	-0.00987221	0.304881	5.22318	1.21484	0.76187	4.83735	0.673832	-0.726056	0.579036
																																						2.7328	0.472278	-1.11606	0.031931	0.343831	5.62216	1.41226	0.760827	5.03122	0.57071	-0.689999	0.643428
																																						2.7572	0.56502	-1.09363	0.0716281	0.376211	6.00068	1.5967	0.761914	5.20375	0.469677	-0.661197	0.70525
																																						2.7816	0.650373	-1.06917	0.106987	0.402661	6.35353	1.76202	0.765667	5.34496	0.393255	-0.639679	0.765562
																																						2.806	0.727707	-1.04168	0.133329	0.420329	6.67651	1.90545	0.771776	5.44718	0.357553	-0.623792	0.825111
																																						2.8304	0.797516	-1.00989	0.145789	0.426548	6.96624	2.026	0.779225	5.50702	0.369189	-0.611006	0.883392
																																						2.8548	0.860276	-0.973792	0.141342	0.421283	7.22067	2.12307	0.786644	5.52576	0.425795	-0.598874	0.938915
																																						2.8792	0.916132	-0.9351	0.123482	0.40588	7.44	2.19674	0.792907	5.50908	0.517344	-0.585735	0.990512
																																						2.9036	0.965293	-0.896897	0.102874	0.381188	7.62769	2.24955	0.797497	5.46658	0.627121	-0.570679	1.03813
																																						2.928	1.00817	-0.86111	0.0878734	0.347496	7.79082	2.2887	0.800292	5.41054	0.73452	-0.55294	1.08215
																																						2.9524	1.04482	-0.825838	0.0773808	0.305296	7.93903	2.32463	0.801328	5.35282	0.820603	-0.531661	1.12223
																																						2.9768	1.07439	-0.787523	0.0665719	0.256012	8.08242	2.36491	0.800842	5.30159	0.872846	-0.506291	1.15756
																																						3.0012	1.09535	-0.746238	0.055589	0.202683	8.22924	2.40932	0.79935	5.26001	0.88625	-0.476758	1.18851
																																						3.0256	1.10635	-0.708485	0.0498403	0.14972	8.38487	2.45062	0.79754	5.22756	0.860875	-0.443164	1.2173
																																						3.05	1.10689	-0.684309	0.0536173	0.10177	8.55195	2.47955	0.795893	5.20202	0.800549	-0.405673	1.2464
																																						3.0744	1.09747	-0.680428	0.0650268	0.0632944	8.73031	2.49011	0.794213	5.18105	0.715717	-0.364578	1.27744
																																						3.0988	1.07965	-0.696285	0.0765223	0.0386276	8.91606	2.48207	0.791693	5.1637	0.622549	-0.320243	1.31247
																																						3.1232	1.056	-0.725654	0.0798378	0.0305563	9.10049	2.45917	0.787449	5.15158	0.535045	-0.273369	1.3545
																																						3.1476	1.02974	-0.76031	0.072433	0.0381799	9.27087	2.42525	0.780827	5.14841	0.461812	-0.225547	1.40593
																																						3.172	1.00398	-0.794284	0.0592822	0.057556	9.41301	2.38246	0.77129	5.15801	0.41232	-0.179083	1.46787
																																						3.1964	0.980705	-0.826261	0.0470677	0.0853166	9.5142	2.33251	0.75828	5.18173	0.400715	-0.135885	1.54085
																																						3.2208	0.960193	-0.856753	0.0378105	0.120177	9.56562	2.27841	0.741324	5.21668	0.437969	-0.0967256	1.62423
																																						3.2452	0.941126	-0.883874	0.0280229	0.160478	9.56377	2.22454	0.720283	5.25673	0.521842	-0.0616736	1.71467
																																						3.2696	0.921091	-0.903488	0.0124719	0.202499	9.51045	2.17571	0.695469	5.29494	0.639872	-0.0309485	1.80717
																																						3.294	0.897362	-0.912165	-0.0108322	0.241919	9.41166	2.13592	0.667635	5.325	0.778742	-0.00502509	1.89738
																																						3.3184	0.867896	-0.909071	-0.0387384	0.275807	9.27653	2.10724	0.63806	5.34289	0.925263	0.0161148	1.98164
																																						3.3428	0.832133	-0.897004	-0.0652708	0.302951	9.11589	2.09	0.608469	5.34854	1.06577	0.0337039	2.05606
																																						3.3672	0.79093	-0.881699	-0.0845119	0.322595	8.94054	2.08327	0.580797	5.34428	1.19074	0.0501167	2.1174
																																						3.3916	0.745952	-0.868079	-0.0927853	0.333444	8.76023	2.08481	0.557084	5.33117	1.29567	0.0680131	2.16428
																																						3.416	0.699281	-0.857929	-0.0899012	0.33402	8.58358	2.09133	0.539172	5.30857	1.37758	0.0892434	2.1975
																																						3.4404	0.653204	-0.852323	-0.0781082	0.322943	8.41813	2.0979	0.528028	5.27601	1.43501	0.11407	2.22022
																																						3.4648	0.609999	-0.853803	-0.0609894	0.299164	8.27013	2.09858	0.523391	5.23374	1.46918	0.140933	2.23747
																																						3.4892	0.571846	-0.86378	-0.0423119	0.262974	8.14356	2.09039	0.523986	5.18233	1.48442	0.166788	2.25459
																																						3.5136	0.540802	-0.879289	-0.0234643	0.216658	8.03886	2.07486	0.527797	5.12312	1.48891	0.188097	2.27568
																																						3.538	0.518618	-0.893586	-0.00417657	0.16472	7.95211	2.05463	0.532317	5.0586	1.49092	0.202292	2.30344
																																						3.5624	0.506465	-0.898404	0.0135229	0.114186	7.87532	2.03113	0.53506	4.99188	1.4931	0.208868	2.33952
																																						3.5868	0.504701	-0.887136	0.0254044	0.0733344	7.79756	2.00713	0.534109	4.92648	1.49333	0.209364	2.38442
																																						3.6112	0.512766	-0.858284	0.0294502	0.0485825	7.70742	1.98772	0.528364	4.86605	1.49048	0.206541	2.43812
																																						3.6356	0.529277	-0.813439	0.0282103	0.0422369	7.59598	1.97567	0.517595	4.81336	1.48723	0.203298	2.5012
																																						3.66	0.55212	-0.752603	0.0260711	0.052669	7.4585	1.96818	0.502294	4.76971	1.48647	0.201679	2.57494
																																						3.6844	0.578534	-0.674988	0.0252812	0.0756891	7.29436	1.96117	0.483222	4.73548	1.48588	0.202458	2.66021
																																						3.7088	0.605484	-0.582812	0.0256142	0.10543	7.10557	1.95429	0.460992	4.71064	1.47861	0.205427	2.75665
																																						3.7332	0.630431	-0.482712	0.0257049	0.135123	6.89557	1.94939	0.43604	4.69415	1.46045	0.209962	2.86178
																																						3.7576	0.652115	-0.384459	0.0241613	0.158808	6.66885	1.94486	0.408806	4.68282	1.43432	0.215439	2.96968
																																						3.782	0.670746	-0.297804	0.0219697	0.172705	6.43137	1.93395	0.380025	4.67117	1.40695	0.221098	3.07144
																																						3.8064	0.687319	-0.229556	0.0229566	0.175293	6.19044	1.90991	0.351044	4.65297	1.38191	0.225713	3.15819
																																						3.8308	0.702604	-0.182547	0.0305925	0.167429	5.95396	1.87095	0.323712	4.62252	1.3571	0.227783	3.22332
																																						3.8552	0.716583	-0.154899	0.0461212	0.152496	5.7295	1.81901	0.299641	4.57517	1.3302	0.226056	3.26282
																																						3.8796	0.728569	-0.139681	0.0685095	0.135707	5.5232	1.75685	0.279677	4.50884	1.30323	0.21986	3.27659
																																						3.904	0.737615	-0.127587	0.0937124	0.122849	5.3392	1.68794	0.263991	4.4256	1.27935	0.209304	3.26961
																																						3.9284	0.742893	-0.111916	0.116477	0.11841	5.1795	1.6159	0.251993	4.33056	1.25817	0.195526	3.24924
																																						3.9528	0.744153	-0.0926303	0.134788	0.123984	5.04414	1.54197	0.241945	4.22943	1.2372	0.180682	3.22241
																																						3.9772	0.742075	-0.0759046	0.150969	0.138435	4.93124	1.46501	0.231332	4.12716	1.21792	0.167254	3.19525
																																						4.0016	0.737874	-0.0675555	0.168197	0.159031	4.83708	1.38535	0.217782	4.02769	1.20708	0.156813	3.17162
																																						4.026	0.73238	-0.0673532	0.187433	0.182735	4.75677	1.30639	0.199635	3.93424	1.20934	0.14914	3.15088
																																						4.0504	0.725687	-0.0709963	0.207726	0.207732	4.68539	1.2315	0.176106	3.8493	1.22359	0.142507	3.1298
																																						4.0748	0.717696	-0.0744914	0.227647	0.234109	4.61874	1.16077	0.147395	3.77462	1.24722	0.134852	3.10667
																																						4.0992	0.708769	-0.0758793	0.247824	0.263224	4.55366	1.09109	0.114822	3.71125	1.27763	0.124825	3.08193
																																						4.1236	0.699584	-0.0759857	0.273565	0.296141	4.4883	1.0201	0.0807966	3.65874	1.30918	0.112324	3.05663
																																						4.148	0.6904	-0.0775444	0.310789	0.332169	4.42225	0.950425	0.048205	3.61487	1.33255	0.0985572	3.03214
																																						4.1724	0.680699	-0.082311	0.358533	0.369574	4.35604	0.888407	0.0194372	3.57729	1.34048	0.0853972	3.00955
																																						4.1968	0.669403	-0.089843	0.408619	0.40757	4.28988	0.839913	-0.00410445	3.5445	1.33409	0.0745209	2.98868
																																						4.2212	0.655069	-0.0982996	0.450959	0.446401	4.22313	0.809208	-0.0218677	3.51498	1.32061	0.0670843	2.96885
																																						4.2456	0.635897	-0.104482	0.478461	0.485702	4.15462	0.799652	-0.0338764	3.48609	1.30495	0.0636664	2.94916
																																						4.27	0.60999	-0.103899	0.490198	0.523658	4.08356	0.812776	-0.0405578	3.45414	1.28691	0.0641056	2.92789
																																						4.2944	0.576137	-0.0923966	0.492483	0.558111	4.01087	0.846171	-0.0425096	3.41711	1.26498	0.067416	2.90344
																																						4.3188	0.534582	-0.0669392	0.496684	0.588147	3.9397	0.893139	-0.0402993	3.37707	1.24007	0.0718621	2.87597
																																						4.3432	0.487002	-0.0243878	0.513461	0.613276	3.87444	0.94579	-0.0347651	3.33905	1.21602	0.0751984	2.84685
																																						4.3676	0.43592	0.0369362	0.547903	0.631147	3.81887	0.99867	-0.0275816	3.30783	1.19738	0.0751293	2.817
																																						4.392	0.384587	0.112132	0.598946	0.637533	3.775	1.04951	-0.0212171	3.28574	1.18425	0.0699011	2.7871
																																						4.4164	0.337318	0.189929	0.660249	0.629025	3.74329	1.09822	-0.0182581	3.27171	1.16912	0.058919	2.75836
																																						4.4408	0.299314	0.260494	0.721043	0.605924	3.72307	1.14554	-0.0207242	3.26147	1.14256	0.0430181	2.73169
																																						4.4652	0.275848	0.320737	0.770247	0.57262	3.71273	1.19073	-0.0296769	3.2497	1.10282	0.024082	2.70632
																																						4.4896	0.271289	0.371844	0.804256	0.535041	3.70996	1.22993	-0.0451273	3.23267	1.0575	0.00436476	2.67987
																																						4.514	0.288058	0.413714	0.830209	0.497922	3.71212	1.25811	-0.0661345	3.20906	1.01861	-0.0140204	2.64893
																																						4.5384	0.325884	0.442145	0.858694	0.464701	3.71638	1.27222	-0.0911048	3.17934	0.999006	-0.0292899	2.61044
																																						4.5628	0.381796	0.451726	0.893795	0.439043	3.72002	1.27072	-0.118328	3.14461	1.00832	-0.039944	2.56363
																																						4.5872	0.450598	0.441147	0.930206	0.424804	3.72117	1.25168	-0.146446	3.10581	1.04801	-0.0447578	2.51068
																																						4.6116	0.525745	0.414648	0.95697	0.424256	3.71913	1.21446	-0.174453	3.0645	1.11171	-0.0427923	2.45585
																																						4.636	0.600582	0.379629	0.963635	0.436458	3.71434	1.16228	-0.201336	3.0244	1.18853	-0.0331291	2.40413
																																						4.6604	0.669438	0.343943	0.945014	0.456898	3.70831	1.10007	-0.225917	2.99053	1.26288	-0.0145118	2.35982
																																						4.6848	0.72821	0.313578	0.90293	0.47911	3.703	1.0292	-0.247127	2.96635	1.31588	0.0145146	2.32671
																																						4.7092	0.774788	0.291702	0.845428	0.497328	3.69956	0.946554	-0.264394	2.95289	1.33196	0.0548438	2.30916
																																						4.7336	0.809282	0.279595	0.783519	0.507899	3.69766	0.848967	-0.277826	2.95064	1.30478	0.106016	2.3107
																																						4.758	0.833508	0.278137	0.727531	0.509623	3.6955	0.73673	-0.288043	2.96089	1.24081	0.166027	2.33086
																																						4.7824	0.849802	0.288872	0.684085	0.503819	3.69018	0.613726	-0.295846	2.9849	1.15925	0.231735	2.36368
																																						4.8068	0.859938	0.312291	0.652679	0.493351	3.67852	0.486914	-0.302174	3.02267	1.08359	0.299316	2.4001
																																						4.8312	0.864692	0.343938	0.626821	0.480861	3.65819	0.365422	-0.308261	3.07284	1.03105	0.364531	2.43268
																																						4.8556	0.864144	0.374637	0.602155	0.467662	3.6283	0.258594	-0.31551	3.13264	1.00829	0.423133	2.45805
																																						4.88	0.858268	0.396345	0.581265	0.454128	3.58947	0.175181	-0.325027	3.19767	1.01012	0.471741	2.47565
																																						4.9044	0.847248	0.40874	0.56997	0.440737	3.54384	0.123492	-0.336999	3.26248	1.0215	0.508656	2.48611
																																						4.9288	0.8315	0.420622	0.572039	0.427809	3.49452	0.109815	-0.350496	3.32192	1.02832	0.533902	2.49052
																																						4.9532	0.811697	0.44316	0.585024	0.414494	3.44448	0.134859	-0.36401	3.37266	1.02797	0.548597	2.48975
																																						4.9776	0.788844	0.482238	0.598068	0.399601	3.39585	0.190434	-0.376231	3.41356	1.02336	0.554109	2.48399
																																						5.002	0.764171	0.538434	0.597773	0.383277	3.34987	0.260883	-0.386506	3.44435	1.00862	0.551302	2.47328
[truncated: 23 more columns]

## Sheet: Figure3E-F
	Action AUC change (3E)												Food AUC change (3F)
		S251	S252	S256	S257	S264	S283	S318	S320	S321				S251	S252	S256	S257	S264	S283	S318	S320	S321
	FR1 Session 1	6.38448	-11.7963	-15.9558	11.0848	47.879	32.5323	2.54104	26.7946	-11.6704			FR1 Session 1	35.4179	-56.2356	-18.6693	-13.1037	128.226	14.497	18.7651	155.855	47.3664
	FR1 Session 2	14.8115	-16.5964	-5.28234	-1.84573	-6.57276	1.92301	-21.1209	-19.9361	4.67994			FR1 Session 2	-41.4256	-18.9932	-50.1273	-9.78884	139.089	87.6114	-0.85905	46.5053	89.2371
	FR1 Session 3		8.11444	-14.2743	-9.84782	-11.395	13.9443	-7.74432	-28.3072	3.5921			FR1 Session 3		-11.6495	-38.8992	11.5392	11.2718	38.6527	-82.3953	-24.647	-22.1099
	FR1 Session 4	-6.519		-14.634	-8.88975	-2.72871	-16.6862	-13.4197	-18.9801	-2.57265			FR1 Session 4	-29.9532		-29.6998	49.8933	-77.3946	-9.17175	-61.7417	-18.1711	-30.6507

## Sheet: Figure3G
							CUE (VTA)																		ACTION+REWARD (VTA)
	S251	S252	S256	S320	S251	S252	S256	S320	S252	S256	S320	S251	S256	S320				S251	S252	S256	S320	S251	S252	S256	S320	S252	S256	S320	S256	S320	S251
Session	D1	D1	D1	D1	D2	D2	D2	D2	D3	D3	D3	D4	D4	D4				D1	D1	D1	D1	D2	D2	D2	D2	D3	D3	D3	D4	D4	D4
	z-score of df/f	z-score of df/f	z-score of df/f	z-score of df/f	z-score of df/f	z-score of df/f	z-score of df/f	z-score of df/f	z-score of df/f	z-score of df/f	z-score of df/f	z-score of df/f	z-score of df/f	z-score of df/f				z-score of df/f	z-score of df/f	z-score of df/f	z-score of df/f	z-score of df/f	z-score of df/f	z-score of df/f	z-score of df/f	z-score of df/f	z-score of df/f	z-score of df/f	z-score of df/f	z-score of df/f	z-score of df/f
Peri-cue time - sec																	Peri-action time - sec
-1.0736	0.0702453	0.455278	0.530205	0.232516	-0.15415	0.308293	-0.386226	-0.418324	0.193612	0.401356	-0.0749943	0.712284	0.506946	0.196174			-2.0496	0.019719	0.105365	0.335175	0.395839	-0.05873	0.020825	-0.0388	-0.01439	0.217888	-0.11931	0.151208	0.100416	-0.00931	0.069489
-1.0492	0.0403417	0.458142	0.524284	0.264492	-0.145179	0.347315	-0.433941	-0.394743	0.188789	0.370787	-0.119358	0.70761	0.511427	0.193592			-2.0252	0.045215	0.09153	0.376875	0.377563	-0.04389	0.009322	-0.06394	-0.04122	0.222385	-0.10886	0.131256	0.106727	-0.02828	0.065088
-1.0248	0.00858699	0.456771	0.512386	0.306024	-0.136029	0.391794	-0.477056	-0.374113	0.176953	0.341715	-0.162705	0.702714	0.505406	0.185506			-2.0008	0.067223	0.068062	0.40809	0.351366	-0.03741	0.007707	-0.0833	-0.06832	0.225971	-0.08584	0.111202	0.118271	-0.04531	0.058142
-1.0004	-0.0221502	0.449161	0.496122	0.352604	-0.127239	0.439324	-0.508526	-0.35412	0.160673	0.315781	-0.202341	0.699357	0.49078	0.174088			-1.9764	0.083653	0.039413	0.428112	0.325635	-0.03717	0.015832	-0.09536	-0.09643	0.229081	-0.0564	0.090063	0.134732	-0.05688	0.05061
-0.976	-0.0471061	0.434335	0.47652	0.395064	-0.119404	0.48612	-0.525221	-0.334693	0.142876	0.295353	-0.235324	0.699322	0.470708	0.159955			-1.952	0.093939	0.008798	0.438497	0.308036	-0.04047	0.031434	-0.10312	-0.12351	0.232894	-0.02764	0.067292	0.155431	-0.06267	0.045585
-0.9516	-0.0617619	0.414016	0.45369	0.426122	-0.112647	0.528342	-0.53044	-0.317056	0.12629	0.282364	-0.258909	0.703737	0.447704	0.142401			-1.9276	0.099074	-0.02227	0.442385	0.301332	-0.04513	0.051326	-0.10995	-0.14644	0.238238	-0.00244	0.0437	0.178957	-0.06383	0.045754
-0.9272	-0.0635544	0.392539	0.428222	0.443733	-0.106812	0.56425	-0.529916	-0.302235	0.11359	0.27584	-0.271685	0.713045	0.423224	0.122785			-1.9032	0.100272	-0.05267	0.442569	0.304828	-0.04929	0.072795	-0.11666	-0.16317	0.244827	0.019737	0.021862	0.203127	-0.06047	0.051447
-0.9028	-0.0527017	0.375126	0.401931	0.448214	-0.101433	0.59486	-0.526792	-0.289713	0.107405	0.272699	-0.274552	0.727192	0.399268	0.105754			-1.8788	0.098152	-0.08214	0.439443	0.315448	-0.0513	0.093908	-0.12335	-0.17328	0.251451	0.038982	0.005287	0.22566	-0.05292	0.059852
-0.8784	-0.0320018	0.365998	0.37682	0.441721	-0.094892	0.621832	-0.520266	-0.277555	0.109461	0.270468	-0.270144	0.745471	0.380216	0.0965747			-1.8544	0.093608	-0.1129	0.431805	0.328038	-0.05019	0.113413	-0.13253	-0.17702	0.257136	0.054669	-0.0037	0.244255	-0.04411	0.066336
-0.854	-0.00418717	0.36729	0.354133	0.428862	-0.0844487	0.644807	-0.507465	-0.264319	0.119498	0.268055	-0.261179	0.766554	0.371785	0.0978248			-1.83	0.089002	-0.14987	0.419359	0.33754	-0.04662	0.13176	-0.14818	-0.17503	0.262143	0.066613	-0.00545	0.25672	-0.03737	0.066304
-0.8296	0.030341	0.378487	0.33486	0.414309	-0.0679918	0.661396	-0.487182	-0.249975	0.135438	0.265035	-0.250106	0.789026	0.377758	0.108407			-1.8056	0.088727	-0.19688	0.403762	0.341448	-0.04352	0.151166	-0.1714	-0.16892	0.267584	0.075085	-0.00216	0.262189	-0.03357	0.057053
-0.8052	0.0714102	0.39689	0.320073	0.401971	-0.0466464	0.669537	-0.461915	-0.234906	0.154902	0.262085	-0.239978	0.811194	0.398551	0.124564			-1.7812	0.099086	-0.25166	0.387963	0.340404	-0.04553	0.173571	-0.19912	-0.16141	0.274388	0.080961	0.003621	0.261716	-0.03218	0.039737
-0.7808	0.115281	0.419277	0.310087	0.395391	-0.0258238	0.668763	-0.436261	-0.219476	0.176529	0.261516	-0.234096	0.830552	0.431823	0.14161			-1.7568	0.127271	-0.30468	0.374784	0.336086	-0.05684	0.199466	-0.22677	-0.15501	0.28266	0.085146	0.009521	0.256864	-0.03311	0.020078
-0.7564	0.15341	0.443871	0.303974	0.394932	-0.012275	0.659638	-0.414157	-0.204668	0.199734	0.265281	-0.235256	0.844651	0.473129	0.155962			-1.7324	0.179659	-0.34371	0.365508	0.328232	-0.07808	0.228718	-0.24965	-0.15065	0.291726	0.087008	0.01384	0.248057	-0.03629	0.006655
-0.732	0.175066	0.470748	0.299849	0.395563	-0.00960129	0.643587	-0.397575	-0.192153	0.223735	0.272604	-0.245462	0.852831	0.517495	0.16612			-1.708	0.259951	-0.36208	0.359412	0.315142	-0.10506	0.260899	-0.26315	-0.14847	0.300911	0.084946	0.016043	0.234766	-0.03988	0.006796
-0.7076	0.172634	0.500111	0.295184	0.390879	-0.0165554	0.623209	-0.386776	-0.183102	0.247962	0.280034	-0.264558	0.856591	0.561447	0.172144			-1.6836	0.368157	-0.36181	0.354458	0.297311	-0.13058	0.294053	-0.26606	-0.14876	0.310094	0.079259	0.016607	0.216794	-0.04023	0.022234
-0.6832	0.144993	0.53157	0.28756	0.378916	-0.0280585	0.601746	-0.380818	-0.177	0.273204	0.283764	-0.290012	0.858306	0.603241	0.175342			-1.6592	0.501997	-0.349	0.34841	0.278644	-0.14868	0.324603	-0.2619	-0.15128	0.319204	0.072453	0.016151	0.195	-0.03389	0.048225
-0.6588	0.096503	0.56477	0.275673	0.364261	-0.0383945	0.581943	-0.378337	-0.172113	0.301086	0.282749	-0.319176	0.860427	0.642428	0.178052			-1.6348	0.659662	-0.33032	0.339737	0.264303	-0.15791	0.349206	-0.25491	-0.15495	0.327437	0.066671	0.015035	0.171136	-0.01985	0.076674
-0.6344	0.0344645	0.59897	0.259537	0.35679	-0.0450338	0.565174	-0.378088	-0.166586	0.331965	0.27995	-0.349418	0.866272	0.679584	0.183309			-1.6104	0.839563	-0.31292	0.328133	0.259163	-0.16079	0.365476	-0.24752	-0.15887	0.333381	0.062816	0.013973	0.147334	-3.39e-05	0.100261
-0.61	-0.033245	0.632411	0.240302	0.366317	-0.0487079	0.551301	-0.378289	-0.158613	0.363609	0.280858	-0.376256	0.879965	0.714489	0.194591			-1.586	1.03636	-0.30195	0.314613	0.267384	-0.16169	0.372099	-0.24135	-0.16317	0.336075	0.061725	0.013812	0.125462	0.022455	0.115405
-0.5856	-0.100507	0.662384	0.220185	0.396001	-0.0502415	0.539639	-0.376632	-0.146466	0.392267	0.290558	-0.39456	0.90388	0.743934	0.213632			-1.5616	1.23838	-0.29756	0.300969	0.291083	-0.16498	0.37001	-0.23774	-0.16834	0.336197	0.064726	0.014656	0.106361	0.045063	0.122983
-0.5612	-0.164257	0.686428	0.201692	0.440917	-0.0485352	0.53004	-0.371366	-0.12965	0.41512	0.310247	-0.40199	0.936831	0.762446	0.238191			-1.5372	1.43013	-0.2957	0.28921	0.329017	-0.17401	0.362091	-0.23801	-0.17364	0.336282	0.072443	0.016608	0.090116	0.065847	0.126502
-0.5368	-0.224335	0.704887	0.186008	0.49201	-0.0416215	0.522522	-0.362069	-0.110064	0.431515	0.336199	-0.400522	0.975253	0.765751	0.263492			-1.5128	1.59753	-0.29131	0.281421	0.377029	-0.19083	0.351129	-0.24306	-0.17706	0.339207	0.083636	0.020832	0.077237	0.082923	0.129524
-0.5124	-0.28207	0.720739	0.172562	0.541687	-0.0296148	0.516664	-0.349655	-0.0909213	0.4424	0.362669	-0.39542	1.01502	0.753807	0.284668			-1.4884	1.7327	-0.28159	0.279215	0.429067	-0.21526	0.339455	-0.25075	-0.17838	0.346174	0.095966	0.028505	0.068713	0.094512	0.134297
-0.488	-0.338132	0.736031	0.160715	0.587453	-0.0161549	0.512386	-0.335544	-0.0747129	0.448996	0.384596	-0.392326	1.05232	0.730887	0.297312			-1.464	1.83581	-0.26696	0.28313	0.477003	-0.24427	0.330238	-0.25632	-0.18117	0.35616	0.107209	0.038753	0.064696	0.100287	0.141652
-0.4636	-0.391705	0.75019	0.151339	0.631236	-0.00674111	0.509767	-0.321651	-0.0624848	0.451575	0.398129	-0.393995	1.08445	0.703101	0.29733			-1.4396	1.91195	-0.24935	0.293162	0.511481	-0.27419	0.327094	-0.25775	-0.1903	0.366978	0.116263	0.048222	0.063397	0.102574	0.151536
-0.4392	-0.441405	0.761215	0.146412	0.675488	-0.0057537	0.506903	-0.31145	-0.0542011	0.449615	0.40144	-0.400431	1.11079	0.676125	0.281984			-1.4152	1.96546	-0.2297	0.309318	0.526214	-0.30327	0.331805	-0.25681	-0.20784	0.376859	0.124403	0.053634	0.061227	0.104872	0.163536
-0.4148	-0.486077	0.767527	0.147236	0.719606	-0.0146119	0.499885	-0.309093	-0.0498271	0.443321	0.396131	-0.411324	1.13294	0.654807	0.252474			-1.3908	1.99798	-0.20755	0.330653	0.520616	-0.3311	0.343301	-0.25339	-0.23242	0.385522	0.135082	0.054427	0.05482	0.108899	0.177242
-0.3904	-0.524813	0.768848	0.153245	0.760536	-0.0322998	0.486186	-0.315798	-0.0498162	0.434819	0.387032	-0.425593	1.15354	0.642705	0.21466			-1.3664	2.01065	-0.18273	0.354278	0.496977	-0.35647	0.358821	-0.24436	-0.26085	0.393751	0.152035	0.052497	0.043885	0.113366	0.192306
-0.366	-0.556504	0.765741	0.162805	0.797327	-0.0566456	0.466689	-0.328421	-0.0542309	0.427571	0.379169	-0.439983	1.17502	0.64033	0.176047			-1.342	2.0066	-0.15628	0.376113	0.458249	-0.37777	0.375392	-0.22974	-0.28917	0.402077	0.176333	0.050997	0.031732	0.115342	0.207149
-0.3416	-0.579578	0.759282	0.174272	0.833489	-0.0847301	0.444318	-0.343204	-0.062449	0.424024	0.373934	-0.450729	1.19965	0.645199	0.142488			-1.3176	1.9907	-0.13074	0.392242	0.40893	-0.39399	0.39062	-0.21442	-0.31385	0.410753	0.204247	0.053323	0.023043	0.113022	0.217754
-0.3172	-0.592906	0.750466	0.185503	0.874228	-0.113588	0.422327	-0.358235	-0.0737171	0.423872	0.368485	-0.456038	1.22942	0.654843	0.1171			-1.2932	1.96687	-0.10947	0.399219	0.354699	-0.40364	0.402965	-0.20373	-0.33233	0.421022	0.229231	0.061571	0.021479	0.107358	0.219143
-0.2928	-0.597149	0.739092	0.193268	0.923476	-0.141195	0.403115	-0.370795	-0.0875068	0.42485	0.359409	-0.456882	1.2645	0.668393	0.100463			-1.2688	1.93528	-0.09277	0.394114	0.302526	-0.4048	0.41146	-0.20091	-0.34203	0.43522	0.246088	0.07593	0.02808	0.100588	0.208447
-0.2684	-0.594891	0.723602	0.193693	0.982814	-0.166622	0.387034	-0.375993	-0.10384	0.424739	0.346448	-0.455367	1.30185	0.684828	0.0919092			-1.2444	1.89296	-0.07708	0.375803	0.261452	-0.39759	0.415063	-0.20609	-0.34099	0.455073	0.252995	0.095508	0.040757	0.093637	0.18718
-0.244	-0.590057	0.702181	0.183409	1.0486	-0.18958	0.372982	-0.370071	-0.123176	0.422726	0.332025	-0.45219	1.33591	0.701731	0.0915835			-1.22	1.83693	-0.0603	0.346317	0.238645	-0.38485	0.41239	-0.21571	-0.33027	0.480147	0.251403	0.11827	0.055296	0.086047	0.16156
-0.2196	-0.587306	0.674698	0.161302	1.11048	-0.209562	0.359787	-0.354232	-0.145313	0.419481	0.31782	-0.447065	1.36112	0.716559	0.100805			-1.1956	1.76594	-0.04476	0.310243	0.234986	-0.37044	0.402342	-0.22545	-0.31418	0.508028	0.244974	0.140082	0.06722	0.077921	0.140079
-0.1952	-0.59047	0.644222	0.129709	1.15637	-0.225237	0.345761	-0.333932	-0.168259	0.415868	0.302549	-0.44084	1.37391	0.727903	0.120028			-1.1712	1.68049	-0.03433	0.272637	0.246513	-0.35734	0.384951	-0.23331	-0.29734	0.535509	0.237929	0.155504	0.073819	0.070215	0.129364
-0.1708	-0.601131	0.616178	0.093454	1.17786	-0.235085	0.328365	-0.313157	-0.188458	0.411322	0.283387	-0.434943	1.3736	0.735506	0.147403			-1.1468	1.58301	-0.03159	0.237531	0.268132	-0.34691	0.361544	-0.23854	-0.283	0.559536	0.233294	0.159925	0.075262	0.063581	0.131318
-0.1464	-0.618474	0.594947	0.0575704	1.17157	-0.239209	0.306382	-0.29022	-0.202177	0.403878	0.259908	-0.429921	1.36199	0.740985	0.179641			-1.1224	1.47802	-0.03827	0.208009	0.294746	-0.33977	0.334698	-0.24076	-0.27352	0.577942	0.231398	0.150809	0.074463	0.058486	0.143764
-0.122	-0.638803	0.581466	0.0256722	1.13954	-0.240478	0.281728	-0.260414	-0.206741	0.392048	0.235992	-0.425594	1.34278	0.748492	0.213097			-1.098	1.37193	-0.05648	0.186788	0.320289	-0.33633	0.30794	-0.24209	-0.27016	0.590308	0.229165	0.128469	0.076415	0.055603	0.16319
-0.0976	-0.655288	0.574445	-0.000492131	1.08779	-0.242804	0.257889	-0.222573	-0.201332	0.376376	0.217875	-0.420552	1.32099	0.761505	0.243924			-1.0736	1.27269	-0.08681	0.176162	0.33861	-0.33529	0.284484	-0.24773	-0.27217	0.598362	0.221236	0.096352	0.08599	0.055276	0.186372
-0.0732	-0.659854	0.571779	-0.0204831	1.02171	-0.248412	0.237301	-0.183469	-0.187339	0.35916	0.211007	-0.41148	1.30112	0.778633	0.268668			-1.0492	1.18886	-0.12473	0.177111	0.34513	-0.33277	0.266147	-0.26082	-0.27775	0.605153	0.20285	0.059671	0.104343	0.057246	0.210716
-0.0488	-0.646363	0.570673	-0.0345052	0.946174	-0.2574	0.220242	-0.155761	-0.167824	0.342962	0.217122	-0.395203	1.28446	0.794458	0.284733			-1.0248	1.12749	-0.16268	0.187708	0.335462	-0.32489	0.253979	-0.27815	-0.28548	0.613457	0.17195	0.023809	0.127708	0.060905	0.234931
-0.0244	-0.613783	0.56873	-0.0430682	0.869276	-0.268876	0.20537	-0.149593	-0.146866	0.329292	0.232634	-0.371372	1.26855	0.803433	0.290169			-1.0004	1.0921	-0.19631	0.202667	0.305305	-0.31137	0.249133	-0.29352	-0.29412	0.624254	0.129856	-0.00657	0.150677	0.065809	0.259661
0	-0.568558	0.564733	-0.0467183	0.800648	-0.281679	0.191852	-0.165318	-0.128605	0.318178	0.250464	-0.342156	1.24925	0.802367	0.284569			-0.976	1.08216	-0.22666	0.215732	0.254499	-0.29559	0.252209	-0.30336	-0.30192	0.636302	0.081465	-0.02886	0.170076	0.072154	0.286975
0.0244	-0.523434	0.557358	-0.0461525	0.746861	-0.294293	0.180626	-0.195207	-0.115777	0.308801	0.264223	-0.310635	1.22367	0.791526	0.269738			-0.9516	1.09338	-0.25658	0.222746	0.189916	-0.28156	0.263026	-0.30864	-0.30718	0.647047	0.033467	-0.04343	0.185022	0.080236	0.319121
0.0488	-0.49095	0.544529	-0.0424414	0.710786	-0.304336	0.172723	-0.229755	-0.109604	0.301017	0.270808	-0.280965	1.19159	0.77488	0.247485			-0.9272	1.11824	-0.28606	0.222899	0.122991	-0.27122	0.28114	-0.31475	-0.309	0.653859	-0.00845	-0.05207	0.195112	0.08961	0.357315
0.0732	-0.476267	0.525935	-0.0372468	0.692013	-0.308519	0.167524	-0.260384	-0.11006	0.296413	0.269571	-0.257972	1.15492	0.75879	0.217938			-0.9028	1.14712	-0.31214	0.218371	0.064637	-0.2641	0.304683	-0.32845	-0.30733	0.655221	-0.04052	-0.05622	0.200391	0.099336	0.400879
0.0976	-0.475839	0.504905	-0.0331162	0.686383	-0.304129	0.163573	-0.280967	-0.114466	0.297573	0.261448	-0.244125	1.1165	0.749353	0.181806			-0.8784	1.16973	-0.33259	0.212755	0.021447	-0.25863	0.329422	-0.35137	-0.30203	0.651594	-0.06156	-0.05678	0.201945	0.109004	0.447561
0.122	-0.482043	0.485786	-0.0328369	0.687986	-0.291483	0.160382	-0.290315	-0.117174	0.306278	0.249855	-0.237837	1.07949	0.749658	0.142911			-0.854	1.17665	-0.34618	0.209441	-0.00615	-0.25345	0.35048	-0.3783	-0.29215	0.645257	-0.07393	-0.05375	0.201419	0.11881	0.495093
0.1464	-0.488763	0.471041	-0.0380262	0.691853	-0.274257	0.159126	-0.291136	-0.112257	0.322394	0.239589	-0.235555	1.04633	0.758391	0.107237			-0.8296	1.16197	-0.35086	0.210971	-0.02168	-0.24817	0.364444	-0.40353	-0.27702	0.639427	-0.08177	-0.04546	0.200494	0.128344	0.542302
0.1708	-0.493502	0.461977	-0.0483687	0.69445	-0.256725	0.161618	-0.285765	-0.096504	0.34424	0.234183	-0.234229	1.01815	0.770682	0.0798872			-0.8052	1.12548	-0.34463	0.218488	-0.0288	-0.24322	0.369837	-0.42443	-0.25806	0.637145	-0.08693	-0.02907	0.200917	0.136308	0.588394
0.1952	-0.495611	0.460305	-0.0620354	0.694874	-0.241526	0.168009	-0.274673	-0.0706534	0.369518	0.235789	-0.231823	0.995485	0.781169	0.0631183			-0.7808	1.0725	-0.32767	0.231898	-0.03105	-0.23882	0.36735	-0.43846	-0.23838	0.639797	-0.08803	-0.00178	0.204462	0.141712	0.631929
0.2196	-0.493619	0.466953	-0.0768999	0.69552	-0.229922	0.175689	-0.25887	-0.0384108	0.395819	0.245971	-0.226838	0.979109	0.787207	0.0572689			-0.7564	1.01216	-0.30318	0.251146	-0.03158	-0.23401	0.36013	-0.44341	-0.22142	0.646554	-0.08319	0.038061	0.212233	0.144682	0.67104
0.244	-0.484593	0.479429	-0.0914683	0.698601	-0.222642	0.18128	-0.240361	-0.00419915	0.421143	0.26504	-0.217984	0.969616	0.789417	0.0627984			-0.732	0.955467	-0.2763	0.276424	-0.03124	-0.22735	0.352189	-0.44101	-0.20996	0.655632	-0.07295	0.08943	0.223962	0.145864	0.704116
0.2684	-0.466177	0.492122	-0.104947	0.704216	-0.220506	0.182813	-0.219884	0.0274654	0.444554	0.291146	-0.204324	0.967031	0.789698	0.0792868			-0.7076	0.912823	-0.25287	0.30703	-0.02846	-0.21812	0.345677	-0.436	-0.20503	0.665477	-0.05978	0.147512	0.238759	0.145627	0.730075
0.2928	-0.439396	0.499241	-0.116844	0.713316	-0.224755	0.179322	-0.197217	0.0514368	0.46617	0.320199	-0.185762	0.970706	0.789531	0.102814			-0.6832	0.890624	-0.23756	0.341181	-0.0211	-0.20591	0.339855	-0.43395	-0.20559	0.674564	-0.04536	0.205161	0.25621	0.144286	0.748241
0.3172	-0.409625	0.496925	-0.127034	0.727369	-0.236228	0.17011	-0.173091	0.0634774	0.486443	0.346923	-0.163899	0.978896	0.790065	0.127288			-0.6588	0.888491	-0.23089	0.37706	-0.00869	-0.18945	0.332681	-0.44053	-0.20964	0.681024	-0.02966	0.255959	0.276241	0.142331	0.758205
0.3416	-0.384494	0.484455	-0.136712	0.743665	-0.254606	0.155126	-0.149767	0.0626633	0.505328	0.366736	-0.141951	0.989231	0.792885	0.147495			-0.6344	0.899629	-0.22905	0.413243	0.006763	-0.16704	0.322853	-0.4582	-0.21493	0.682998	-0.01283	0.295202	0.29944	0.139757	0.759732
0.366	-0.369867	0.465088	-0.147956	0.755862	-0.278681	0.134711	-0.131033	0.0518984	0.522159	0.377716	-0.12297	0.999943	0.799944	0.159117			-0.61	0.913809	-0.22687	0.447982	0.022272	-0.138	0.310151	-0.48317	-0.21888	0.679692	0.002999	0.319683	0.327819	0.136087	0.752406
0.3904	-0.366692	0.445335	-0.161369	0.76071	-0.305944	0.108942	-0.121033	0.0364816	0.536424	0.382245	-0.109137	1.00994	0.812319	0.159274			-0.5856	0.920941	-0.22034	0.478719	0.036175	-0.1033	0.295149	-0.50885	-0.21961	0.672283	0.014284	0.328792	0.363662	0.131447	0.735624
0.4148	-0.370168	0.432108	-0.176071	0.761476	-0.332682	0.0785377	-0.121171	0.0217235	0.548225	0.386298	-0.102456	1.01817	0.829386	0.1495			-0.5612	0.913929	-0.20831	0.502868	0.049575	-0.06525	0.279183	-0.53122	-0.21787	0.663291	0.018104	0.325532	0.407563	0.126416	0.709164
0.4392	-0.372046	0.429536	-0.191903	0.763792	-0.356535	0.0461408	-0.127827	0.0111231	0.557592	0.395026	-0.103827	1.02351	0.849771	0.135663			-0.5368	0.889631	-0.19256	0.519241	0.066124	-0.0264	0.263641	-0.54667	-0.21586	0.654582	0.014754	0.315533	0.457688	0.120965	0.673497
0.4636	-0.365719	0.438559	-0.209099	0.769077	-0.37803	0.0158916	-0.134494	0.00539323	0.563739	0.409531	-0.111853	1.0247	0.872476	0.12329			-0.5124	0.848124	-0.1757	0.528461	0.089297	0.01172	0.248574	-0.54945	-0.21404	0.646219	0.009009	0.304794	0.509792	0.114476	0.630244
0.488	-0.34957	0.458699	-0.226127	0.772403	-0.398521	-0.00766253	-0.137121	0.00222	0.565289	0.428274	-0.123783	1.02044	0.89675	0.114442			-0.488	0.791549	-0.15995	0.531752	0.119981	0.048313	0.232418	-0.53846	-0.21076	0.637273	0.007658	0.297908	0.558524	0.105736	0.582454
0.5124	-0.325993	0.489029	-0.239884	0.768123	-0.417718	-0.020542	-0.137606	-0.00164374	0.56087	0.448062	-0.135946	1.00997	0.921195	0.10913			-0.4636	0.723401	-0.14758	0.529933	0.157833	0.082127	0.21375	-0.52148	-0.20495	0.627349	0.014619	0.297021	0.600281	0.092765	0.533044
0.5368	-0.299216	0.527669	-0.248174	0.757844	-0.433586	-0.020602	-0.141729	-0.00693334	0.549556	0.463586	-0.143206	0.993238	0.943242	0.106633			-0.4392	0.64893	-0.14185	0.523972	0.203578	0.110839	0.192919	-0.50846	-0.19823	0.617377	0.028834	0.301472	0.634788	0.074238	0.48318
0.5612	-0.273601	0.571254	-0.251489	0.750411	-0.443791	-0.00850528	-0.153329	-0.0116847	0.531379	0.470415	-0.141069	0.970916	0.959757	0.105022			-0.4148	0.575151	-0.14618	0.515779	0.257937	0.131706	0.171989	-0.50474	-0.19388	0.609207	0.046458	0.309012	0.663888	0.050867	0.433288
0.5856	-0.25212	0.615813	-0.252908	0.754598	-0.447222	0.0122186	-0.171588	-0.0147948	0.507366	0.46909	-0.128919	0.944383	0.967896	0.101564			-0.3904	0.508123	-0.16012	0.508348	0.318269	0.14355	0.154002	-0.5111	-0.19412	0.604227	0.064207	0.317784	0.689404	0.025142	0.384783
0.61	-0.23625	0.658281	-0.25653	0.774617	-0.444614	0.0362924	-0.193969	-0.0178976	0.478687	0.464327	-0.110061	0.914968	0.965747	0.0935478			-0.366	0.449842	-0.17722	0.505396	0.377273	0.148134	0.141998	-0.52495	-0.19844	0.602148	0.081163	0.327186	0.712047	0.000504	0.340015
0.6344	-0.227434	0.697256	-0.264968	0.811871	-0.438551	0.0581794	-0.219065	-0.0230673	0.446049	0.460286	-0.0889857	0.883188	0.953135	0.0793529			-0.3416	0.398181	-0.18919	0.510216	0.42591	0.149892	0.13746	-0.54185	-0.20445	0.601281	0.098205	0.337712	0.732076	-0.02004	0.301433
0.6588	-0.228135	0.733425	-0.277747	0.865889	-0.433361	0.0731662	-0.244995	-0.0300923	0.410036	0.457311	-0.0681052	0.849089	0.931878	0.0603082			-0.3172	0.349123	-0.19169	0.524499	0.457781	0.154923	0.139347	-0.55855	-0.21047	0.599912	0.116018	0.350416	0.750292	-0.03547	0.271273
0.6832	-0.241255	0.768579	-0.292266	0.930982	-0.433344	0.0785327	-0.267159	-0.037089	0.371956	0.453434	-0.0466989	0.813156	0.904902	0.0411308			-0.2928	0.299252	-0.18515	0.548229	0.471165	0.169036	0.145034	-0.57423	-0.21732	0.597215	0.13327	0.366163	0.767355	-0.04739	0.251183
0.7076	-0.268418	0.802368	-0.305813	0.996919	-0.44034	0.0740093	-0.280045	-0.043666	0.334587	0.448216	-0.0238757	0.776942	0.875216	0.0273088			-0.2684	0.247015	-0.17246	0.579681	0.46908	0.194413	0.152129	-0.58906	-0.22743	0.593265	0.146341	0.385288	0.782478	-0.05882	0.241977
0.732	-0.307956	0.830688	-0.316439	1.05578	-0.453514	0.0608559	-0.281183	-0.0520432	0.301258	0.443957	-0.00195157	0.743	0.846141	0.0219878			-0.244	0.192183	-0.15862	0.615151	0.457101	0.227228	0.159578	-0.60363	-0.24211	0.588844	0.150753	0.407817	0.793733	-0.07138	0.24385
0.7564	-0.354505	0.849022	-0.32301	1.10433	-0.471249	0.041062	-0.272505	-0.0642781	0.273508	0.443633	0.0140026	0.714119	0.821392	0.0257067			-0.2196	0.134675	-0.14915	0.649809	0.439441	0.259941	0.167253	-0.61841	-0.26023	0.585335	0.142958	0.43382	0.799518	-0.08419	0.255901
0.7808	-0.401629	0.85663	-0.325494	1.13911	-0.493078	0.0176487	-0.257768	-0.0799237	0.250648	0.448851	0.0190173	0.692335	0.803692	0.0378593			-0.1952	0.074626	-0.14549	0.679783	0.419393	0.286165	0.174212	-0.63238	-0.27884	0.584581	0.122188	0.463149	0.799848	-0.09696	0.275564
0.8052	-0.444989	0.857194	-0.32496	1.15518	-0.518767	-0.00522177	-0.239868	-0.0974088	0.231723	0.459527	0.0102836	0.67835	0.793954	0.0577637			-0.1708	0.012857	-0.14315	0.703511	0.402426	0.302604	0.178211	-0.64317	-0.2942	0.588286	0.091863	0.494377	0.796314	-0.11206	0.298889
0.8296	-0.483151	0.856969	-0.322729	1.15134	-0.545465	-0.0235423	-0.220757	-0.116639	0.217116	0.473838	-0.0111361	0.671782	0.791924	0.0845139			-0.1464	-0.05055	-0.13541	0.721409	0.395287	0.308873	0.177606	-0.64993	-0.30325	0.596852	0.058444	0.524516	0.790225	-0.13184	0.321462
0.854	-0.516535	0.861259	-0.319548	1.13268	-0.567627	-0.034441	-0.201475	-0.139169	0.208387	0.487588	-0.0396563	0.671358	0.796672	0.115229			-0.122	-0.1178	-0.11951	0.734807	0.403403	0.307033	0.172883	-0.65497	-0.30512	0.609084	0.028282	0.549997	0.781141	-0.15586	0.340046
0.8784	-0.54573	0.870745	-0.31519	1.10808	-0.579989	-0.0362631	-0.181897	-0.166103	0.206729	0.495881	-0.0684489	0.674987	0.80664	0.144645			-0.0976	-0.19217	-0.09958	0.745199	0.428941	0.299684	0.166631	-0.66182	-0.3018	0.623409	0.005593	0.566551	0.767612	-0.18214	0.35323
0.9028	-0.57066	0.882003	-0.308295	1.08762	-0.579827	-0.0297734	-0.16261	-0.196346	0.211622	0.497213	-0.0934878	0.680514	0.819626	0.168321			-0.0732	-0.27486	-0.08234	0.753516	0.470061	0.288685	0.162313	-0.67301	-0.29685	0.638927	-0.00786	0.569162	0.748902	-0.20949	0.360448
0.9272	-0.591498	0.891601	-0.297257	1.08003	-0.566974	-0.0186895	-0.146121	-0.226429	0.220987	0.494401	-0.114003	0.686211	0.832606	0.185621			-0.0488	-0.36326	-0.07099	0.759257	0.521842	0.276019	0.161527	-0.68893	-0.2926	0.655135	-0.01267	0.555777	0.726274	-0.23799	0.361846
0.9516	-0.609292	0.898918	-0.281883	1.08826	-0.543308	-0.00725618	-0.134913	-0.252012	0.232569	0.49123	-0.131331	0.690376	0.842315	0.198989			-0.0244	-0.4524	-0.06438	0.760974	0.576599	0.264466	0.162882	-0.70663	-0.28865	0.671339	-0.01059	0.530677	0.703013	-0.26714	0.358855
0.976	-0.624688	0.905876	-0.263684	1.10774	-0.512713	0.00188959	-0.13003	-0.270212	0.245141	0.489873	-0.147886	0.691068	0.846723	0.21181			0	-0.53774	-0.06035	0.757977	0.625351	0.256477	0.164806	-0.72027	-0.28269	0.687099	-0.00269	0.502177	0.682379	-0.2948	0.353225
1.0004	-0.636716	0.914733	-0.244609	1.13072	-0.479789	0.00729646	-0.131699	-0.280521	0.258598	0.490878	-0.165321	0.68652	0.845593	0.226441			0.0244	-0.61611	-0.05901	0.750892	0.662405	0.251842	0.16737	-0.72435	-0.27244	0.703038	0.011336	0.477761	0.664946	-0.31849	0.345434
1.0248	-0.643455	0.925765	-0.225804	1.15209	-0.447957	0.00789901	-0.139956	-0.284379	0.273278	0.494047	-0.182647	0.675916	0.839791	0.242559			0.0488	-0.685	-0.06283	0.74095	0.687521	0.247021	0.170742	-0.71744	-0.25728	0.720598	0.033238	0.461005	0.648319	-0.3362	0.335006
1.0492	-0.643409	0.935741	-0.207373	1.17114	-0.419581	0.00318935	-0.154983	-0.28468	0.289168	0.499113	-0.196458	0.659851	0.830709	0.258079			0.0732	-0.74246	-0.07278	0.7294	0.702038	0.237119	0.174467	-0.70113	-0.23871	0.740736	0.06413	0.451024	0.629356	-0.3462	0.322018
1.0736	-0.636273	0.938125	-0.189436	1.19037	-0.396518	-0.00653697	-0.176666	-0.284394	0.305607	0.505319	-0.203968	0.640075	0.819834	0.271787			0.0976	-0.78813	-0.08532	0.716962	0.705793	0.217843	0.178563	-0.67594	-0.21934	0.762626	0.099427	0.444186	0.606366	-0.34809	0.307552
1.098	-0.622855	0.925864	-0.173201	1.21357	-0.379632	-0.0201652	-0.202942	-0.284692	0.321864	0.510815	-0.2058	0.618306	0.807876	0.283803			0.122	-0.82355	-0.09409	0.703325	0.699644	0.187305	0.183436	-0.64272	-0.20153	0.783814	0.128171	0.437278	0.580165	-0.34332	0.293193
1.1224	-0.604941	0.895147	-0.160484	1.2445	-0.368861	-0.0355327	-0.228552	-0.284317	0.337953	0.513996	-0.204373	0.594841	0.79442	0.293978			0.1464	-0.8514	-0.09377	0.687569	0.687442	0.147393	0.188741	-0.60593	-0.18688	0.801937	0.140478	0.429804	0.554088	-0.3337	0.279833
																	0.1708	-0.87461	-0.08261	0.669137	0.674846	0.102046	0.193434	-0.57057	-0.17616	0.816207	0.134745	0.42281	0.531971	-0.32059	0.266554
																	0.1952	-0.8961	-0.06196	0.647539	0.667428	0.05499	0.196564	-0.53929	-0.16877	0.827408	0.117683	0.416168	0.515251	-0.30481	0.251058
																	0.2196	-0.91794	-0.03464	0.621469	0.668604	0.010383	0.197564	-0.51425	-0.16252	0.836348	0.098773	0.407854	0.502832	-0.28608	0.230754
																	0.244	-0.93993	-0.00527	0.589683	0.680441	-0.02689	0.196674	-0.49717	-0.156	0.842181	0.0844	0.394908	0.493673	-0.26378	0.203383
																	0.2684	-0.95976	0.020406	0.552181	0.706431	-0.05322	0.195062	-0.48732	-0.15117	0.842896	0.076077	0.374727	0.487781	-0.23831	0.167533
																	0.2928	-0.97556	0.039085	0.50982	0.750591	-0.06718	0.193899	-0.48327	-0.15195	0.837602	0.072052	0.345997	0.484419	-0.21097	0.122894
																	0.3172	-0.98736	0.051825	0.463712	0.813036	-0.06868	0.193602	-0.4855	-0.16068	0.828199	0.069372	0.30907	0.481034	-0.1831	0.070185
																	0.3416	-0.99543	0.06251	0.41541	0.887339	-0.05915	0.193798	-0.49525	-0.17685	0.81882	0.065674	0.265697	0.474606	-0.15593	0.010839
																	0.366	-0.99791	0.075829	0.366979	0.964551	-0.04215	0.193118	-0.51326	-0.19736	0.813395	0.059816	0.217877	0.463465	-0.13181	-0.0534
																	0.3904	-0.99016	0.096733	0.320357	1.0404	-0.02239	0.18897	-0.5414	-0.21715	0.813601	0.051258	0.16717	0.447961	-0.11447	-0.12023
																	0.4148	-0.96689	0.128889	0.276965	1.11512	-0.00467	0.178763	-0.58147	-0.23131	0.818796	0.039763	0.11521	0.430297	-0.10688	-0.18613
																	0.4392	-0.92578	0.17119	0.237972	1.18626	0.006939	0.162	-0.63058	-0.23688	0.827329	0.025478	0.064027	0.413204	-0.10904	-0.24647
																	0.4636	-0.8695	0.216402	0.203892	1.24699	0.010058	0.14053	-0.68053	-0.233	0.837566	0.008174	0.016017	0.397979	-0.11836	-0.29646
																	0.488	-0.80431	0.25437	0.173491	1.29074	0.003983	0.116974	-0.72222	-0.22024	0.847503	-0.01321	-0.02619	0.384376	-0.13079	-0.33281
																	0.5124	-0.73728	0.277011	0.143959	1.3136	-0.01188	0.093405	-0.74965	-0.20096	0.854099	-0.03854	-0.06054	0.372244	-0.14189	-0.35513
																	0.5368	-0.67415	0.281189	0.112645	1.31569	-0.03863	0.070706	-0.7619	-0.17958	0.854553	-0.0648	-0.08622	0.36262	-0.14901	-0.36607
																	0.5612	-0.61797	0.269249	0.078131	1.3034	-0.07653	0.048598	-0.7623	-0.16066	0.848668	-0.08865	-0.10369	0.357637	-0.15297	-0.36968
																	0.5856	-0.56897	0.247967	0.040021	1.28669	-0.12277	0.026572	-0.75522	-0.14633	0.839092	-0.11018	-0.11493	0.359492	-0.15623	-0.37016
																	0.61	-0.52603	0.224512	-0.00072	1.27275	-0.17053	0.004881	-0.74491	-0.13566	0.82949	-0.13272	-0.1233	0.369587	-0.16012	-0.37198
																	0.6344	-0.48805	0.202787	-0.04092	1.26363	-0.21126	-0.01516	-0.73662	-0.12564	0.822953	-0.15936	-0.13244	0.388341	-0.16421	-0.37969
																	0.6588	-0.45394	0.184805	-0.0758	1.25978	-0.23852	-0.03162	-0.73653	-0.11351	0.820942	-0.19071	-0.1441	0.414161	-0.16768	-0.39671
																	0.6832	-0.42343	0.173734	-0.10124	1.26404	-0.24985	-0.04301	-0.74963	-0.09891	0.822874	-0.22552	-0.1565	0.44253	-0.16967	-0.42402
																	0.7076	-0.39911	0.173979	-0.11546	1.2812	-0.24574	-0.04881	-0.77769	-0.08385	0.826776	-0.26134	-0.16568	0.467819	-0.1686	-0.45974
																	0.732	-0.38585	0.187993	-0.11914	1.31458	-0.22857	-0.04845	-0.81877	-0.07135	0.830337	-0.29531	-0.16809	0.485596	-0.16402	-0.49945
																	0.7564	-0.38713	0.212891	-0.11441	1.36408	-0.20299	-0.04129	-0.86738	-0.06533	0.831927	-0.32607	-0.16159	0.492371	-0.15818	-0.53747
																	0.7808	-0.40237	0.240855	-0.10361	1.42616	-0.1753	-0.02816	-0.91573	-0.06962	0.831157	-0.35484	-0.14525	0.485335	-0.15405	-0.56907
																	0.8052	-0.42776	0.263072	-0.08842	1.49467	-0.15082	-0.01136	-0.95752	-0.08447	0.828824	-0.38464	-0.11927	0.463679	-0.15388	-0.59197
																	0.8296	-0.45908	0.273135	-0.06941	1.56255	-0.1316	0.007138	-0.99218	-0.10561	0.826664	-0.41851	-0.08596	0.42953	-0.15893	-0.60644
																	0.854	-0.49287	0.268096	-0.04617	1.62472	-0.11646	0.026292	-1.0253	-0.12738	0.826748	-0.45672	-0.05009	0.388105	-0.16852	-0.61488
																	0.8784	-0.52631	0.248087	-0.0183	1.68026	-0.10256	0.04537	-1.06485	-0.14573	0.830663	-0.49548	-0.01692	0.346033	-0.17942	-0.62113
																	0.9028	-0.55801	0.21613	0.013782	1.73	-0.08688	0.063585	-1.11549	-0.15928	0.839109	-0.52951	0.010187	0.308005	-0.1878	-0.62981
																	0.9272	-0.5881	0.179094	0.049196	1.77216	-0.06746	0.080013	-1.17577	-0.1689	0.851602	-0.55524	0.030124	0.27584	-0.19228	-0.64536
																	0.9516	-0.61632	0.146243	0.087484	1.80336	-0.04414	0.093947	-1.23951	-0.1753	0.866333	-0.57186	0.043133	0.250536	-0.19429	-0.67071
																	0.976	-0.64049	0.123399	0.129364	1.82329	-0.01754	0.105541	-1.29828	-0.1766	0.88077	-0.58058	0.050947	0.233684	-0.19574	-0.70618
																	1.0004	-0.65728	0.109598	0.176048	1.83508	0.012301	0.11547	-1.3443	-0.16932	0.892829	-0.58314	0.057791	0.227334	-0.19662	-0.7497
																	1.0248	-0.66367	0.100517	0.22637	1.84162	0.046314	0.123177	-1.37306	-0.15129	0.901699	-0.58006	0.069098	0.23292	-0.19514	-0.79797
																	1.0492	-0.65832	0.093036	0.274841	1.84376	0.08588	0.126167	-1.38374	-0.12223	0.907458	-0.57045	0.088289	0.249847	-0.1894	-0.84761
																	1.0736	-0.64291	0.085558	0.313468	1.84245	0.132034	0.122067	-1.37788	-0.08298	0.910193	-0.55434	0.115883	0.275679	-0.17731	-0.89578
																	1.098	-0.6216	0.077121	0.335421	1.83986	0.183631	0.110894	-1.35824	-0.03562	0.909934	-0.53408	0.151268	0.308382	-0.15531	-0.94037
																	1.1224	-0.59775	0.069762	0.33738	1.83678	0.236672	0.09474	-1.32689	0.016801	0.90704	-0.51233	0.193585	0.347675	-0.11906	-0.97975
																	1.1468	-0.57099	0.069559	0.319372	1.83065	0.287306	0.076232	-1.28355	0.071135	0.902841	-0.48944	0.241405	0.39371	-0.06626	-1.01326
																	1.1712	-0.53837	0.08193	0.283522	1.81523	0.335284	0.057677	-1.2272	0.125176	0.900376	-0.46279	0.292324	0.444674	0.000678	-1.04211
																	1.1956	-0.49797	0.107146	0.233644	1.77989	0.38421	0.040105	-1.15929	0.177974	0.903732	-0.42885	0.342308	0.495453	0.074722	-1.06937
																	1.22	-0.45041	0.141457	0.175331	1.71293	0.439512	0.022333	-1.08394	0.228502	0.916241	-0.38602	0.386261	0.538317	0.14739	-1.09809
																	1.2444	-0.39811	0.181115	0.115587	1.6108	0.505777	0.001966	-1.00699	0.275351	0.939448	-0.33676	0.420246	0.565501	0.212609	-1.12918
																	1.2688	-0.34458	0.22425	0.06216	1.48355	0.585093	-0.02234	-0.93649	0.318447	0.973323	-0.28764	0.443254	0.572643	0.268505	-1.16127
																	1.2932	-0.29373	0.269333	0.022712	1.349	0.677295	-0.05008	-0.88073	0.359619	1.01661	-0.24505	0.457936	0.560918	0.316791	-1.19178
																	1.3176	-0.24919	0.313111	0.003635	1.22454	0.780835	-0.07931	-0.84246	0.401255	1.06669	-0.21091	0.470119	0.536503	0.360723	-1.21682
																	1.342	-0.21312	0.350333	0.008473	1.12451	0.893039	-0.10638	-0.81783	0.445681	1.11948	-0.18409	0.486572	0.508023	0.403366	-1.23126
																	1.3664	-0.18403	0.375677	0.03707	1.05843	1.00963	-0.1263	-0.80252	0.495881	1.1705	-0.16335	0.51266	0.483877	0.448236	-1.23037
																	1.3908	-0.15579	0.386791	0.08661	1.02855	1.12512	-0.13424	-0.79375	0.555073	1.21651	-0.14732	0.551413	0.471723	0.501558	-1.21104
																	1.4152	-0.12097	0.385802	0.152935	1.03099	1.23455	-0.12612	-0.78483	0.625485	1.25635	-0.13389	0.603576	0.47947	0.573263	-1.17074
																	1.4396	-0.07547	0.378355	0.231281	1.05817	1.33444	-0.09909	-0.76548	0.709255	1.29087	-0.12029	0.668176	0.515101	0.676246	-1.10636
																	1.464	-0.01841	0.370562	0.317769	1.09925	1.42224	-0.0536	-0.72871	0.810256	1.32334	-0.10292	0.744816	0.586101	0.825458	-1.01398
																	1.4884	0.05	0.365559	0.410656	1.14119	1.49587	0.006049	-0.67251	0.932937	1.35948	-0.07742	0.838409	0.699742	1.03567	-0.88912
																	1.5128	0.127979	0.36381	0.509725	1.17109	1.55376	0.07491	-0.59616	1.07823	1.40592	-0.03974	0.961197	0.862081	1.3158	-0.72771
																	1.5372	0.21124	0.365799	0.614754	1.17882	1.59477	0.150336	-0.49984	1.24152	1.46781	0.013481	1.12722	1.07501	1.66353	-0.5276
																	1.5616	0.293521	0.371553	0.724645	1.15985	1.61916	0.230814	-0.38689	1.41565	1.54729	0.084932	1.34459	1.3347	2.06443	-0.28985
																	1.586	0.367488	0.378813	0.837901	1.1153	1.62885	0.314618	-0.26355	1.59458	1.64364	0.175835	1.61265	1.63329	2.49398	-0.01844
																	1.6104	0.42714	0.383861	0.952973	1.04963	1.62566	0.401224	-0.13782	1.77258	1.75476	0.284904	1.92248	1.96162	2.92196	0.281538
																	1.6348	0.472068	0.383747	1.0667	0.968786	1.61066	0.491354	-0.0185	1.94198	1.87885	0.408496	2.25812	2.31049	3.3201	0.605363
																	1.6592	0.508986	0.378465	1.17367	0.878367	1.58555	0.584761	0.0876	2.09397	2.01492	0.542519	2.59929	2.67057	3.66817	0.947823
																	1.6836	0.547442	0.372334	1.2689	0.781693	1.5528	0.680028	0.178598	2.2218	2.16233	0.684283	2.92622	3.03177	3.95485	1.30101
																	1.708	0.593948	0.372764	1.35045	0.680978	1.51493	0.776039	0.256497	2.32315	2.32045	0.831316	3.22378	3.38322	4.17605	1.65365
																	1.7324	0.649998	0.386598	1.41902	0.580959	1.47447	0.872328	0.322965	2.39962	2.48795	0.979427	3.48209	3.71439	4.33302	1.99313
																	1.7568	0.713414	0.416436	1.47629	0.489483	1.43464	0.968443	0.377347	2.45484	2.66234	1.12404	3.69515	4.01676	4.43132	2.30804
																	1.7812	0.77938	0.459512	1.52389	0.414294	1.39989	1.06336	0.4187	2.49383	2.83999	1.26272	3.86065	4.285	4.47914	2.58934
																	1.8056	0.840854	0.510139	1.56294	0.360533	1.37468	1.15556	0.44676	2.52237	3.01658	1.39478	3.98066	4.51686	4.48525	2.83078
																	1.83	0.89086	0.563441	1.59404	0.329732	1.36143	1.24333	0.463134	2.54477	3.1878	1.5189	4.06075	4.71174	4.45814	3.0292
																	1.8544	0.926028	0.616686	1.6178	0.320664	1.35959	1.32447	0.47386	2.56154	3.35063	1.63279	4.10801	4.86986	4.40553	3.18513
																	1.8788	0.947813	0.667719	1.63461	0.333286	1.36552	1.39653	0.486845	2.56972	3.50459	1.73457	4.1293	4.99266	4.33395	3.3034
																	1.9032	0.960801	0.71377	1.6437	0.369494	1.37338	1.458	0.506209	2.56688	3.65271	1.82315	4.13035	5.08305	4.24883	3.39294
																	1.9276	0.970857	0.752948	1.64439	0.429368	1.37745	1.50922	0.530827	2.55415	3.80026	1.89781	4.11523	5.14449	4.15421	3.46361
																	1.952	0.983941	0.786	1.63742	0.509668	1.37347	1.55232	0.557152	2.53434	3.9513	1.95762	4.08606	5.18055	4.05225	3.5222
																	1.9764	1.00455	0.814629	1.62448	0.602884	1.35889	1.5907	0.582633	2.50796	4.10647	2.00191	4.04406	5.19506	3.94406	3.57199
																	2.0008	1.03446	0.838816	1.60803	0.696335	1.33346	1.62838	0.606546	2.47273	4.26401	2.03166	3.9912	5.19191	3.831	3.61451
																	2.0252	1.07291	0.857913	1.5912	0.775993	1.29833	1.66963	0.6289	2.42701	4.42161	2.04961	3.93025	5.17414	3.71487	3.65044
																	2.0496	1.11837	0.873205	1.57679	0.833559	1.25515	1.71877	0.649499	2.37227	4.5777	2.05928	3.86353	5.14332	3.59814	3.67997
																	2.074	1.17007	0.887706	1.56649	0.872689	1.20721	1.77898	0.66757	2.31234	4.73151	2.06508	3.79205	5.09991	3.48356	3.70398
																	2.0984	1.2274	0.904502	1.56106	0.908164	1.15976	1.85092	0.682057	2.25141	4.88197	2.07296	3.71461	5.04424	3.37242	3.72489
																	2.1228	1.28838	0.925836	1.55985	0.955682	1.11783	1.93321	0.691289	2.19238	5.02708	2.08799	3.62802	4.97769	3.26429	3.74585
																	2.1472	1.34934	0.952778	1.56	1.02148	1.08311	2.02405	0.692653	2.1365	5.16425	2.11048	3.52961	4.9028	3.15826	3.76925
																	2.1716	1.40638	0.984956	1.55688	1.10029	1.05381	2.12193	0.685371	2.08417	5.29077	2.13538	3.42008	4.82178	3.05275	3.79687
																	2.196	1.4569	1.02045	1.54684	1.18166	1.02861	2.22549	0.672896	2.03521	5.40426	2.15588	3.30402	4.7361	2.94536	3.83119
																	2.2204	1.49859	1.05642	1.53095	1.2578	1.00867	2.33305	0.660453	1.98879	5.50408	2.16765	3.18776	4.64765	2.83508	3.87518
																	2.2448	1.52715	1.09032	1.51623	1.32525	0.994728	2.44217	0.651503	1.94331	5.59232	2.17194	3.07692	4.55872	2.72369	3.93035
																	2.2692	1.5372	1.1213	1.51278	1.38314	0.985623	2.54993	0.646611	1.8969	5.67345	2.1755	2.97508	4.47148	2.61377	3.99501
																	2.2936	1.52517	1.15024	1.52982	1.43541	0.980159	2.65468	0.64561	1.84929	5.75299	2.18499	2.88292	4.38792	2.50697	4.06429
																	2.318	1.4906	1.1781	1.5737	1.49087	0.978336	2.75753	0.651553	1.8034	5.83664	2.20108	2.7984	4.30922	2.40468	4.1324
																	2.3424	1.43731	1.20561	1.64774	1.55529	0.981278	2.86205	0.670034	1.76377	5.92995	2.21957	2.71896	4.23594	2.30941	4.19521
																	2.3668	1.37403	1.23458	1.75185	1.62734	0.99134	2.97355	0.704151	1.73479	6.03814	2.23693	2.64272	4.16952	2.22438	4.25185
																	2.3912	1.31146	1.26659	1.88215	1.70576	1.01221	3.09917	0.752828	1.72114	6.16602	2.2533	2.56879	4.11269	2.15266	4.30591
																	2.4156	1.2583	1.30157	2.03138	1.79425	1.04792	3.24831	0.814444	1.72777	6.31789	2.27138	2.49906	4.06792	2.0967	4.36529
																	2.44	1.22055	1.33977	2.18932	1.8952	1.10095	3.43131	0.89112	1.75944	6.49634	2.29508	2.43904	4.0369	2.05749	4.43993
																	2.4644	1.20226	1.38236	2.34364	2.00507	1.17167	3.65563	0.987003	1.82168	6.70052	2.32935	2.39464	4.02123	2.03517	4.5384
																	2.4888	1.20538	1.42909	2.48185	2.11763	1.25911	3.92105	1.10109	1.92053	6.92532	2.37779	2.36957	4.02257	2.02992	4.66605
																	2.5132	1.22938	1.479	2.59343	2.22555	1.3609	4.21863	1.22533	2.05946	7.16204	2.43907	2.36607	4.04108	2.04056	4.82462
																	2.5376	1.27014	1.53412	2.67175	2.32037	1.47287	4.53538	1.35088	2.23621	7.40057	2.50697	2.38541	4.07396	2.06274	5.01178
																	2.562	1.31885	1.59891	2.7153	2.39672	1.58958	4.85907	1.47182	2.44179	7.63231	2.57453	2.42651	4.11646	2.08868	5.22046
																	2.5864	1.36319	1.67448	2.72738	2.45455	1.70554	5.18022	1.58244	2.66245	7.85135	2.63745	2.48442	4.16426	2.10847	5.43952
																	2.6108	1.39126	1.75607	2.71433	2.49706	1.81682	5.49255	1.67682	2.8831	8.0539	2.69475	2.55077	4.21455	2.11376	5.6562
																	2.6352	1.39589	1.83727	2.68353	2.5289	1.92253	5.79261	1.75255	3.08899	8.23779	2.7473	2.61546	4.26572	2.10102	5.85962
																	2.6596	1.37667	1.91351	2.64162	2.5543	2.02402	6.07769	1.81042	3.26682	8.40284	2.79612	2.66718	4.31629	2.07061	6.04309
																	2.684	1.33806	1.98157	2.5934	2.57558	2.12203	6.34428	1.85169	3.40668	8.55086	2.84204	2.69429	4.36346	2.02461	6.20477
																	2.7084	1.28649	2.0393	2.54216	2.59357	2.21595	6.58878	1.87899	3.50383	8.68504	2.88619	2.68756	4.40299	1.96597	6.34697
																	2.7328	1.22873	2.08677	2.49024	2.6073	2.30545	6.80906	1.89804	3.5585	8.80918	2.92903	2.64339	4.43112	1.89845	6.47439
																	2.7572	1.16981	2.12495	2.43911	2.61271	2.39012	7.00433	1.91436	3.57321	8.92636	2.96855	2.56586	4.44614	1.82648	6.59148
																	2.7816	1.11116	2.15255	2.38951	2.60262	2.46931	7.17452	1.92859	3.55071	9.03779	3.00128	2.46548	4.44828	1.75463	6.70014
																	2.806	1.05116	2.16624	2.34173	2.56984	2.5428	7.32079	1.93722	3.49407	9.14353	3.02554	2.35463	4.43917	1.6874	6.79943
																	2.8304	0.987436	2.1647	2.29609	2.51389	2.61007	7.44602	1.93717	3.40742	9.24394	3.0425	2.24292	4.42118	1.62816	6.88771
																	2.8548	0.918519	2.15155	2.2541	2.44471	2.67139	7.55407	1.92892	3.2965	9.33963	3.05559	2.13534	4.39632	1.57647	6.96513
																	2.8792	0.844651	2.1352	2.21809	2.37751	2.72932	7.64963	1.91703	3.16802	9.43025	3.07033	2.03352	4.36554	1.52789	7.03461
																	2.9036	0.768512	2.12633	2.18942	2.32238	2.78598	7.73903	1.90679	3.02856	9.51398	3.09301	1.93769	4.32922	1.47746	7.10143
																	2.928	0.695171	2.13447	2.16809	2.27931	2.8412	7.82968	1.89865	2.88481	9.58876	3.12763	1.84685	4.28824	1.42286	7.17172
																	2.9524	0.63013	2.16605	2.15387	2.24195	2.89506	7.9274	1.88836	2.74343	9.65412	3.17366	1.75885	4.24532	1.36463	7.25101
																	2.9768	0.576674	2.22199	2.14668	2.20375	2.95033	8.03476	1.87262	2.60936	9.71238	3.22649	1.67127	4.20541	1.30506	7.34436
																	3.0012	0.53465	2.29508	2.14641	2.16163	3.01172	8.15157	1.85132	2.48458	9.7681	3.27909	1.58187	4.17461	1.24687	7.45667
																	3.0256	0.501519	2.37312	2.15249	2.11701	3.08321	8.2758	1.82664	2.36843	9.82655	3.32423	1.48895	4.15842	1.19068	7.59234
																	3.05	0.475005	2.44561	2.16356	2.07371	3.16633	8.40452	1.80419	2.25808	9.89268	3.35683	1.39336	4.16068	1.13348	7.75519
																	3.0744	0.454925	2.50667	2.17805	2.0353	3.25908	8.53528	1.7916	2.14959	9.97047	3.37567	1.30002	4.1833	1.07075	7.94771
																	3.0988	0.442605	2.55452	2.19525	2.00344	3.35581	8.66648	1.79263	2.03999	10.0624	3.38391	1.21624	4.22567	1.00015	8.16931
																	3.1232	0.43921	2.58975	2.21484	1.97725	3.45004	8.79691	1.80494	1.92992	10.1687	3.38794	1.14797	4.28422	0.923477	8.41586
																	3.1476	0.444952	2.61353	2.2356	1.95643	3.53884	8.92601	1.8224	1.82436	10.2865	3.39356	1.09763	4.35313	0.846561	8.68102
																	3.172	0.459109	2.62789	2.25543	1.94398	3.62337	9.05527	1.83764	1.73025	10.4116	3.40309	1.06377	4.42563	0.776858	8.95721
																	3.1964	0.479865	2.6368	2.27236	1.94433	3.7057	9.18841	1.84543	1.6539	10.5404	3.41725	1.04215	4.49525	0.720393	9.23577
																	3.2208	0.50439	2.64521	2.28553	1.9614	3.78631	9.32978	1.84578	1.59993	10.6707	3.43773	1.02862	4.55689	0.680232	9.50783
																	3.2452	0.529427	2.65726	2.29531	1.99651	3.86451	9.4825	1.84334	1.57037	10.8009	3.46504	1.02232	4.60684	0.65662	9.76535
																	3.2696	0.551673	2.67511	2.30263	2.04494	3.9398	9.64705	1.84282	1.56375	10.9304	3.49601	1.02595	4.64287	0.647756	10.002
																	3.294	0.568387	2.69892	2.30772	2.09782	4.01202	9.82134	1.84542	1.57542	11.0582	3.52556	1.04363	4.66521	0.650405	10.2143
																	3.3184	0.578981	2.72848	2.30932	2.15039	4.08142	10.0017	1.8494	1.5996	11.1815	3.55001	1.0782	4.67728	0.659907	10.4039
																	3.3428	0.585694	2.76571	2.30567	2.20442	4.14864	10.1852	1.85304	1.63091	11.2957	3.56827	1.12947	4.6851	0.670848	10.5761
																	3.3672	0.591243	2.81429	2.29587	2.26072	4.21441	10.3719	1.85796	1.66481	11.3963	3.58213	1.19452	4.6957	0.679918	10.7374
																	3.3916	0.596968	2.8756	2.28016	2.31642	4.2797	10.5654	1.86882	1.69775	11.4804	3.59655	1.26991	4.71544	0.687772	10.8909
																	3.416	0.604578	2.94611	2.2599	2.3693	4.34635	10.7696	1.88952	1.72791	11.5477	3.61744	1.35277	4.74932	0.697004	11.0346
																	3.4404	0.616758	3.0205	2.23723	2.41729	4.41658	10.9856	1.92016	1.75438	11.5994	3.64804	1.43944	4.8004	0.709534	11.1625
																	3.4648	0.633866	3.09567	2.21411	2.456	4.49108	11.2107	1.95648	1.77498	11.6359	3.68802	1.52454	4.86867	0.725912	11.2682
																	3.4892	0.65173	3.17129	2.19245	2.48036	4.56747	11.4396	1.99181	1.78674	11.6575	3.73539	1.60266	4.95111	0.745634	11.3481
																	3.5136	0.664007	3.24819	2.1744	2.48652	4.64173	11.6667	2.02107	1.78785	11.6638	3.78787	1.67016	5.04268	0.76807	11.4025
																	3.538	0.666475	3.32683	2.16205	2.47371	4.71092	11.8865	2.04442	1.77852	11.6539	3.84212	1.72477	5.13684	0.793133	11.4346
																	3.5624	0.659168	3.40698	2.15685	2.44842	4.77419	12.0939	2.06682	1.76062	11.6259	3.89255	1.76494	5.22641	0.8209	11.4475
																	3.5868	0.645819	3.488	2.15874	2.42492	4.83192	12.2843	2.09294	1.73692	11.5785	3.93243	1.78988	5.30556	0.851239	11.443
																	3.6112	0.631944	3.56832	2.16564	2.4165	4.88506	12.4536	2.12405	1.71038	11.5119	3.95752	1.79961	5.37147	0.883872	11.4212
																	3.6356	0.621394	3.64572	2.17463	2.42481	4.93536	12.5997	2.15825	1.6833	11.4286	3.96909	1.79585	5.42446	0.917952	11.3813
																	3.66	0.613663	3.71968	2.1841	2.44029	4.9855	12.7233	2.18987	1.65643	11.331	3.97226	1.78322	5.46649	0.951732	11.3222
																	3.6844	0.605627	3.79183	2.19453	2.45228	5.03866	12.8276	2.21196	1.62861	11.2204	3.97234	1.7682	5.49965	0.983865	11.2443
																	3.7088	0.59533	3.86368	2.20743	2.45618	5.09832	12.9177	2.22295	1.59725	11.0973	3.97376	1.75701	5.52635	1.01464	11.1494
																	3.7332	0.58301	3.93541	2.22368	2.45206	5.16824	12.9991	2.22735	1.56	10.9639	3.98033	1.75407	5.54998	1.04518	11.0401
																	3.7576	0.570041	4.00666	2.2429	2.44174	5.25078	13.075	2.22987	1.51685	10.8239	3.99411	1.76058	5.57429	1.07703	10.9197
																	3.782	0.558426	4.07733	2.26375	2.42881	5.34377	13.1454	2.23334	1.47053	10.6821	4.01563	1.77455	5.60213	1.11292	10.7911
																	3.8064	0.550373	4.14728	2.28525	2.41622	5.44019	13.2068	2.23951	1.42346	10.5429	4.0451	1.79268	5.63495	1.15554	10.6562
																	3.8308	0.547626	4.21533	2.3079	2.4019	5.53144	13.2544	2.24779	1.37507	10.4096	4.08284	1.81139	5.67267	1.205	10.5162
																	3.8552	0.551287	4.2798	2.33323	2.38128	5.61069	13.2837	2.25689	1.32428	10.2844	4.12861	1.82713	5.71396	1.2581	10.3713
																	3.8796	0.562051	4.33914	2.36228	2.35255	5.67508	13.2933	2.26836	1.27263	10.1667	4.18088	1.83654	5.75698	1.30973	10.2216
																	3.904	0.580149	4.39167	2.39484	2.3166	5.7265	13.2846	2.28584	1.22235	10.0542	4.23708	1.8364	5.7998	1.35513	10.0686
																	3.9284	0.60435	4.4365	2.42961	2.2758	5.76898	13.2594	2.31148	1.17438	9.94419	4.29422	1.82371	5.84033	1.39193	9.91549
																	3.9528	0.631034	4.47413	2.4641	2.23271	5.80487	13.2182	2.34548	1.13028	9.83504	4.34907	1.79602	5.87667	1.42101	9.76521
																	3.9772	0.6557	4.50451	2.4951	2.18577	5.83356	13.1611	2.38785	1.09233	9.72632	4.39904	1.75263	5.90742	1.44419	9.61757
																	4.0016	0.675858	4.52637	2.52042	2.12965	5.85317	13.0885	2.43743	1.06141	9.61772	4.44303	1.6961	5.93079	1.46072	9.47002
																	4.026	0.691505	4.53985	2.53908	2.06328	5.86233	13.0004	2.48977	1.03731	9.50913	4.48104	1.63173	5.94355	1.4676	9.32112
																	4.0504	0.703811	4.54785	2.55025	1.9946	5.86112	12.8972	2.539	1.01926	9.40078	4.5143	1.56476	5.94259	1.4632	9.17247
																	4.0748	0.714848	4.5535	2.55385	1.93648	5.85141	12.7801	2.58151	1.00596	9.29301	4.54571	1.49821	5.92766	1.45023	9.02716
																	4.0992	0.727264	4.55876	2.55228	1.89784	5.83645	12.6508	2.61729	0.997206	9.18615	4.57917	1.43283	5.90152	1.4353	8.88667
																	4.1236	0.742277	4.56649	2.54994	1.87906	5.82064	12.5107	2.64883	0.994928	9.08081	4.61826	1.36756	5.86747	1.425	8.74922
																	4.148	0.758676	4.58174	2.55068	1.87598	5.80934	12.3626	2.6786	1.00195	8.97789	4.66488	1.3003	5.82733	1.42145	8.61083
																	4.1724	0.775033	4.6095	2.55623	1.8846	5.80649	12.2104	2.70621	1.01951	8.87788	4.71747	1.2303	5.78144	1.42187	8.46778
																	4.1968	0.792359	4.65146	2.56636	1.90121	5.81276	12.0566	2.72811	1.04519	8.78073	4.77102	1.15895	5.72921	1.42229	8.31773
																	4.2212	0.814055	4.7056	2.57912	1.92279	5.8269	11.9017	2.74174	1.07319	8.68653	4.82047	1.08869	5.66969	1.42108	8.16042
																	4.2456	0.843868	4.7672	2.59117	1.94962	5.84692	11.7462	2.74839	1.09717	8.59557	4.86319	1.02319	5.60202	1.41917	7.9983
																	4.27	0.884151	4.82947	2.59903	1.98701	5.86922	11.5919	2.75041	1.11334	8.50754	4.89754	0.967711	5.52627	1.41784	7.83598
																	4.2944	0.935338	4.8854	2.60049	2.04165	5.88861	11.4413	2.74829	1.12107	8.4211	4.92132	0.926893	5.44437	1.41661	7.67854
																	4.3188	0.995932	4.931	2.59476	2.11439	5.90085	11.2964	2.74325	1.12185	8.33431	4.93366	0.901385	5.36019	1.41376	7.52936
																	4.3432	1.06309	4.96694	2.58165	2.19878	5.90471	11.1585	2.73948	1.11889	8.2454	4.93616	0.887184	5.27865	1.40823	7.38851
																	4.3676	1.13419	4.9966	2.56144	2.28576	5.90153	11.025	2.7409	1.11685	8.1539	4.93047	0.878602	5.20366	1.40009	7.25335
																	4.392	1.20678	5.02211	2.53519	2.36597	5.89316	10.8908	2.74877	1.11988	8.06175	4.91582	0.871359	5.13653	1.39019	7.12073
																	4.4164	1.27599	5.04296	2.50453	2.42922	5.88055	10.7515	2.76364	1.12861	7.97267	4.89004	0.863897	5.07593	1.38003	6.98865
																	4.4408	1.33454	5.05906	2.47145	2.46744	5.86478	10.6066	2.78408	1.13948	7.88902	4.85241	0.856534	5.01955	1.37179	6.85582
																	4.4652	1.37775	5.07311	2.43812	2.48054	5.84951	10.4584	2.80512	1.14739	7.80997	4.80488	0.849688	4.9661	1.36788	6.72092
																	4.4896	1.40745	5.0898	2.40576	2.47719	5.84123	10.3098	2.82325	1.1495	7.73283	4.75115	0.844965	4.91521	1.36979	6.5832
																	4.514	1.43098	5.11419	2.37401	2.46826	5.84713	10.1631	2.83874	1.14739	7.65516	4.69486	0.846478	4.86505	1.37731	6.44293
																	4.5384	1.45704	5.15015	2.34217	2.46172	5.87342	10.0198	2.85138	1.1457	7.57561	4.6371	0.858161	4.81105	1.38881	6.30117
																	4.5628	1.49159	5.19878	2.31009	2.46368	5.92405	9.88177	2.85972	1.14848	7.49392	4.57552	0.880898	4.74823	1.40202	6.15974
																	4.5872	1.536	5.25818	2.27766	2.47797	5.99857	9.7509	2.8644	1.15784	7.41061	4.50727	0.91192	4.67488	1.41426	6.02144
																	4.6116	1.58783	5.32362	2.24499	2.50136	6.09185	9.62846	2.86832	1.17479	7.32647	4.43229	0.945199	4.59339	1.422	5.88975
																	4.636	1.6434	5.38851	2.21341	2.52383	6.19683	9.51413	2.87348	1.19867	7.24231	4.35267	0.973165	4.5086	1.42156	5.76768
																	4.6604	1.69969	5.44752	2.18518	2.53666	6.30671	9.40604	2.87995	1.22737	7.15855	4.26915	0.989349	4.42608	1.41036	5.65663
																	4.6848	1.75551	5.50012	2.16203	2.53847	6.41465	9.30139	2.88639	1.25856	7.07538	4.1801	0.990304	4.35014	1.38795	5.5563
																	4.7092	1.81269	5.55	2.1442	2.53667	6.51368	9.19671	2.88988	1.28912	6.99363	4.08464	0.97505	4.28222	1.35651	5.46535
																	4.7336	1.87481	5.60108	2.13062	2.54759	6.59773	9.08841	2.88721	1.31462	6.91428	3.98495	0.943839	4.22077	1.32024	5.38161
																	4.758	1.94394	5.65479	2.11991	2.59011	6.6624	8.97438	2.87773	1.3314	6.83685	3.88562	0.899896	4.16172	1.2835	5.30231
																	4.7824	2.01964	5.70904	2.11094	2.67298	6.70492	8.85547	2.86229	1.33865	6.7593	3.79183	0.85027	4.10036	1.24929	5.22459
																	4.8068	2.09897	5.75828	2.10274	2.7887	6.72518	8.73485	2.83939	1.33776	6.67927	3.70772	0.802554	4.0348	1.21986	5.14614
																	4.8312	2.17733	5.79602	2.09483	2.91999	6.72761	8.61626	2.80718	1.33064	6.5944	3.63619	0.762544	3.96748	1.19762	5.06625
																	4.8556	2.25164	5.81699	2.08751	3.04834	6.72	8.5026	2.76825	1.31998	6.50191	3.57976	0.735052	3.90213	1.18446	4.98657
																	4.88	2.32285	5.81965	2.08153	3.15796	6.70966	8.39475	2.72708	1.30946	6.39951	3.54042	0.72502	3.84008	1.17966	4.90996
																	4.9044	2.39502	5.81026	2.07715	3.23793	6.70096	8.29111	2.68678	1.30215	6.28664	3.51877	0.736018	3.77981	1.17958	4.83823
																	4.9288	2.47338	5.80147	2.07473	3.28333	6.69546	8.18881	2.651	1.29907	6.1641	3.51258	0.766646	3.71939	1.18039	4.77189
																	4.9532	2.56221	5.8029	2.07573	3.29546	6.69345	8.08577	2.62185	1.29911	6.03363	3.51571	0.81013	3.6583	1.18026	4.71178
																	4.9776	2.66304	5.81573	2.08213	3.28172	6.69524	7.98154	2.59578	1.30046	5.89906	3.51905	0.858037	3.59685	1.17841	4.65947
																	5.002	2.77476	5.83613	2.09491	3.25142	6.7005	7.87592	2.56738	1.30201	5.7667	3.51392	0.903355	3.53416	1.17338	4.61627

## Sheet: Figure3H-I
	Action AUC change (3H)								Food AUC change (3I)
		S251	S252	S256	S320					S251	S252	S256	S320
	FR1 Session 1	-52.8487	13.0103	-8.07573	37.0427				FR1 Session 1	83.5054	73.3682	105.623	76.7416
	FR1 Session 2	-1.36827	-5.70787	-9.54283	3.20843				FR1 Session 2	114.137	202.382	63.9815	160.45
	FR1 Session 3		7.45188	-5.38986	-5.65758				FR1 Session 3		337.265	123.209	178.108
	FR1 Session 4	-26.5703		-1.54517	-9.36032				FR1 Session 4	237.423		245.439	180.917

## Sheet: Figure3-Supp1A and B
	F3-S1-PANEL A																																	AUC FOR PERI ACTION CHANGE (PANEL B)
		S251	S252	S256	S257	S264	S283	S318	S320	S321	S251	S252	S256	S257	S264	S283	S318	S320	S321	S251	S252	S256	S257	S264	S283	S318	S320	S321
	Trial number	0-30	0-30	0-30	0-30	0-30	0-30	0-30	0-30	0-30	31-60	31-60	31-60	31-60	31-60	31-60	31-60	31-60	31-60	61-90	61-90	61-90	61-90	61-90	61-90	61-90	61-90	61-90
	Peri-action time - sec	z-score of df/f	z-score of df/f	z-score of df/f	z-score of df/f	z-score of df/f	z-score of df/f	z-score of df/f	z-score of df/f	z-score of df/f	z-score of df/f	z-score of df/f	z-score of df/f	z-score of df/f	z-score of df/f	z-score of df/f	z-score of df/f	z-score of df/f	z-score of df/f	z-score of df/f	z-score of df/f	z-score of df/f	z-score of df/f	z-score of df/f	z-score of df/f	z-score of df/f	z-score of df/f	z-score of df/f							S251	S252	S256	S257	S264	S283	S318	S320	S321
	-2.0496	0.094823	0.039285	-0.25607	0.378812	-0.07183	-0.16998	-0.03946	-0.02146	-0.17336	-0.03383	0.531509	0.213219	-0.12898	-0.12574	-0.15838	-0.11821	0.387463	0.195072	-0.22976	-0.12392	0.227108	0.115055	-0.36984	-0.93248	-0.0283	0.115941	-0.34185						TRIAL 1-30	-14.0912	23.252	2.30194	-19.6973	-16.3984	-2.75685	-8.44103	-1.9685	-3.15413
	-2.0252	0.090682	0.010009	-0.28321	0.452759	-0.07757	-0.15839	0.005359	-0.00635	-0.18053	-0.02141	0.542625	0.20536	-0.13947	-0.14375	-0.17702	-0.14345	0.42404	0.172308	-0.2271	-0.14903	0.212167	0.193017	-0.35049	-0.95438	-0.02507	0.087748	-0.34381						TRIAL 31-60	16.7879	-5.08512	-11.3766	-2.92962	4.96672	-18.6408	-21.7517	-26.2601	14.4085
	-2.0008	0.084466	-0.01531	-0.28783	0.530001	-0.08683	-0.15494	0.053457	0.011262	-0.16808	-0.00881	0.553699	0.191805	-0.15854	-0.16205	-0.19008	-0.16061	0.458602	0.158638	-0.2175	-0.20949	0.190878	0.271393	-0.3309	-0.97084	-0.01779	0.05534	-0.34803						TRIAL 61-90	-22.5925	4.37665	-35.5919	-4.24298	1.00689	-39.094	-13.1098	-28.0642	-18.9921
	-1.9764	0.080229	-0.03594	-0.27518	0.61063	-0.09884	-0.16012	0.104704	0.030395	-0.14657	0.003218	0.572032	0.172616	-0.18377	-0.17939	-0.199	-0.16673	0.491123	0.163589	-0.20074	-0.29358	0.163536	0.345158	-0.3114	-0.97956	-0.00607	0.022997	-0.34555
	-1.952	0.081381	-0.05357	-0.25114	0.691727	-0.11243	-0.17386	0.158342	0.049323	-0.12452	0.013717	0.597477	0.150905	-0.21291	-0.19529	-0.20635	-0.16097	0.521951	0.18974	-0.17729	-0.38088	0.131854	0.41106	-0.29322	-0.97926	0.010171	-0.00366	-0.32892
	-1.9276	0.090444	-0.0698	-0.21732	0.768763	-0.12672	-0.19503	0.212636	0.065522	-0.1029	0.021888	0.623776	0.130629	-0.24435	-0.20997	-0.2144	-0.14589	0.551109	0.227991	-0.14796	-0.44826	0.097641	0.467383	-0.2779	-0.9701	0.030071	-0.01847	-0.29987
	-1.9032	0.108844	-0.08374	-0.17142	0.837567	-0.14187	-0.22106	0.265612	0.076304	-0.07836	0.027505	0.644076	0.114589	-0.27675	-0.22379	-0.22395	-0.12584	0.57815	0.263955	-0.11329	-0.47844	0.061193	0.513602	-0.26636	-0.95392	0.052105	-0.01631	-0.26554
	-1.8788	0.136429	-0.0916	-0.1123	0.894783	-0.15867	-0.24819	0.31499	0.079731	-0.04919	0.031199	0.653496	0.103012	-0.30845	-0.23657	-0.23529	-0.10433	0.602531	0.288379	-0.0736	-0.46983	0.022262	0.549893	-0.25873	-0.93381	0.074399	0.005466	-0.23219
	-1.8544	0.171092	-0.08805	-0.04295	0.937198	-0.17795	-0.27281	0.357811	0.075214	-0.01585	0.034434	0.648405	0.093554	-0.33723	-0.24812	-0.24936	-0.08307	0.623938	0.300218	-0.02998	-0.43654	-0.01781	0.576985	-0.25467	-0.91266	0.094962	0.04623	-0.2039
	-1.83	0.208973	-0.0687	0.030441	0.961908	-0.20038	-0.29275	0.390888	0.063526	0.020359	0.039058	0.62771	0.083923	-0.36108	-0.25926	-0.26698	-0.06309	0.642303	0.304357	0.015024	-0.39766	-0.05572	0.596588	-0.25358	-0.89128	0.112236	0.102302	-0.18176
	-1.8056	0.245421	-0.03281	0.100436	0.968136	-0.22618	-0.30723	0.411759	0.04621	0.055499	0.046674	0.595022	0.074217	-0.37809	-0.27188	-0.28708	-0.04623	0.657663	0.308976	0.058114	-0.36691	-0.08744	0.61138	-0.25445	-0.86784	0.125668	0.167722	-0.16304
	-1.7812	0.276271	0.015621	0.160118	0.95793	-0.25459	-0.31623	0.419875	0.025014	0.083533	0.05819	0.556516	0.065812	-0.38587	-0.28794	-0.30748	-0.03537	0.670155	0.319583	0.09679	-0.3486	-0.10988	0.624801	-0.25598	-0.84001	0.135879	0.235781	-0.14294
	-1.7568	0.298822	0.068671	0.204692	0.934452	-0.28396	-0.3204	0.41758	0.001797	0.100254	0.073591	0.516751	0.059169	-0.38271	-0.30857	-0.32643	-0.03324	0.680134	0.333125	0.1306	-0.33878	-0.12286	0.641219	-0.25681	-0.80778	0.143879	0.300825	-0.11798
	-1.7324	0.312261	0.116366	0.232037	0.901696	-0.312	-0.32096	0.40958	-0.02146	0.104303	0.091966	0.478414	0.053756	-0.36937	-0.33357	-0.34116	-0.04136	0.688049	0.341217	0.161079	-0.3305	-0.12927	0.664557	-0.25586	-0.77295	0.149871	0.359084	-0.08847
	-1.708	0.317655	0.149303	0.242104	0.86571	-0.33568	-0.31922	0.400949	-0.04278	0.096337	0.111844	0.4444	0.049236	-0.34859	-0.36132	-0.34693	-0.05937	0.694075	0.337024	0.190653	-0.32235	-0.13273	0.695638	-0.25196	-0.7361	0.153206	0.408168	-0.05731
	-1.6836	0.317509	0.160944	0.236062	0.83274	-0.35121	-0.31656	0.394459	-0.06024	0.080438	0.131662	0.417965	0.045673	-0.32335	-0.3889	-0.34005	-0.08471	0.698116	0.316814	0.221406	-0.31929	-0.13522	0.731947	-0.24332	-0.69544	0.15346	0.446422	-0.02643
	-1.6592	0.314913	0.148985	0.215469	0.805831	-0.35465	-0.3155	0.38853	-0.07197	0.063246	0.150025	0.401926	0.042532	-0.29615	-0.4123	-0.3208	-0.11364	0.700162	0.27968	0.254314	-0.3231	-0.13712	0.770409	-0.22802	-0.64851	0.151284	0.472945	0.001682
	-1.6348	0.312452	0.116473	0.181932	0.784565	-0.34348	-0.32012	0.37827	-0.07656	0.048835	0.165607	0.398341	0.038005	-0.26995	-0.42707	-0.29281	-0.14317	0.700346	0.228234	0.289147	-0.32912	-0.13833	0.809348	-0.20523	-0.59444	0.14809	0.487702	0.021521
	-1.6104	0.311269	0.0709	0.137669	0.767025	-0.31792	-0.33413	0.359686	-0.07359	0.037663	0.177024	0.408123	0.029688	-0.24762	-0.4295	-0.26203	-0.17216	0.698502	0.169866	0.325005	-0.33366	-0.13883	0.847996	-0.17561	-0.53481	0.144992	0.49139	0.028222
	-1.586	0.310802	0.020508	0.086234	0.751063	-0.28049	-0.35892	0.3325	-0.06396	0.030969	0.183008	0.431146	0.016237	-0.22954	-0.41753	-0.23558	-0.20076	0.693888	0.117399	0.361071	-0.33803	-0.13958	0.884678	-0.14068	-0.47361	0.142225	0.485322	0.021547
	-1.5616	0.309272	-0.02847	0.032967	0.734482	-0.23483	-0.39344	0.29896	-0.04976	0.03059	0.182568	0.467242	-0.00106	-0.21357	-0.39127	-0.21884	-0.22952	0.685603	0.083458	0.397109	-0.34582	-0.1436	0.914217	-0.10219	-0.41631	0.139196	0.471276	0.006841
	-1.5372	0.304495	-0.07217	-0.01509	0.714138	-0.18504	-0.43414	0.261885	-0.03392	0.032975	0.174863	0.515862	-0.01811	-0.19684	-0.35286	-0.21278	-0.25894	0.673112	0.073296	0.433492	-0.36001	-0.15514	0.928209	-0.0621	-0.36811	0.134629	0.451684	-0.00589
	-1.5128	0.294604	-0.1092	-0.05117	0.685233	-0.13493	-0.47511	0.224668	-0.0196	0.028066	0.159227	0.573375	-0.02968	-0.17619	-0.30574	-0.21431	-0.28955	0.656286	0.085789	0.470805	-0.38238	-0.17688	0.920082	-0.02263	-0.33225	0.126919	0.430379	-0.00719
	-1.4884	0.278577	-0.14037	-0.07189	0.643396	-0.08662	-0.51014	0.191513	-0.00899	0.006525	0.135686	0.631861	-0.03181	-0.14877	-0.25414	-0.2194	-0.3221	0.635585	0.116192	0.509343	-0.41372	-0.20818	0.889811	0.013709	-0.30868	0.114779	0.412568	0.008232
	-1.464	0.256578	-0.16768	-0.0783	0.588241	-0.04068	-0.53492	0.166334	-0.00249	-0.03383	0.105395	0.681322	-0.02333	-0.11402	-0.20289	-0.22648	-0.3573	0.612745	0.155341	0.548779	-0.45367	-0.24575	0.843855	0.044282	-0.29385	0.097588	0.403135	0.043627
	-1.4396	0.230111	-0.194	-0.07357	0.52392	0.002421	-0.54787	0.151654	0.001082	-0.08819	0.070408	0.713557	-0.00551	-0.07533	-0.15683	-0.23695	-0.39473	0.590853	0.191167	0.588094	-0.50015	-0.28472	0.79111	0.06663	-0.28264	0.075101	0.404779	0.1002
	-1.4152	0.201863	-0.22253	-0.06032	0.456174	0.041971	-0.55007	0.14808	0.00358	-0.14866	0.033089	0.725529	0.019326	-0.0384	-0.11975	-0.25339	-0.43165	0.573206	0.21422	0.626037	-0.54948	-0.31901	0.738758	0.079141	-0.27054	0.046949	0.417835	0.174303
	-1.3908	0.17522	-0.25481	-0.04018	0.389359	0.077617	-0.54477	0.154157	0.006898	-0.20849	-0.00419	0.719051	0.047927	-0.00735	-0.09397	-0.27696	-0.46343	0.56211	0.223536	0.66191	-0.59774	-0.34263	0.690966	0.081792	-0.25548	0.01272	0.441259	0.25733
	-1.3664	0.153671	-0.29022	-0.01501	0.32536	0.109481	-0.53591	0.167407	0.012589	-0.26136	-0.03909	0.697491	0.075098	0.017424	-0.08071	-0.30619	-0.48589	0.558679	0.226843	0.695941	-0.6416	-0.35178	0.649282	0.076465	-0.23912	-0.02716	0.473214	0.337891
	-1.342	0.140272	-0.32783	0.01255	0.26362	0.137617	-0.52658	0.185694	0.021676	-0.29713	-0.06958	0.664408	0.094457	0.038008	-0.08013	-0.33813	-0.49696	0.563159	0.235136	0.729108	-0.67708	-0.34594	0.612266	0.066675	-0.22519	-0.07077	0.511104	0.404508
	-1.3176	0.137141	-0.36764	0.039257	0.202033	0.161554	-0.51813	0.207261	0.034397	-0.30504	-0.09439	0.624439	0.101514	0.056585	-0.09125	-0.36971	-0.49535	0.575025	0.257519	0.762666	-0.69867	-0.328	0.575271	0.05644	-0.21642	-0.11537	0.551899	0.450418
	-1.2932	0.144967	-0.40909	0.061967	0.139242	0.180212	-0.51065	0.230256	0.049898	-0.28321	-0.11342	0.582834	0.095581	0.074231	-0.11231	-0.39771	-0.47893	0.592809	0.296679	0.797429	-0.70146	-0.30316	0.533251	0.048775	-0.21317	-0.15859	0.592817	0.478809
	-1.2688	0.162864	-0.44966	0.0786	0.076737	0.192483	-0.50398	0.253173	0.066453	-0.24163	-0.12772	0.544475	0.07847	0.090522	-0.1411	-0.41877	-0.44603	0.614141	0.345818	0.833158	-0.68425	-0.27694	0.484245	0.045191	-0.21322	-0.19889	0.631525	0.498669
	-1.2444	0.188984	-0.48685	0.088048	0.018996	0.19844	-0.49818	0.275267	0.08212	-0.19763	-0.13913	0.514617	0.052969	0.103717	-0.1754	-0.43043	-0.39789	0.63613	0.392157	0.868611	-0.65039	-0.25254	0.429058	0.046113	-0.21169	-0.2353	0.665595	0.513582
	-1.22	0.22161	-0.52045	0.088856	-0.02773	0.200389	-0.49438	0.296061	0.094918	-0.1688	-0.14979	0.49871	0.022627	0.112143	-0.21325	-0.43198	-0.33878	0.655682	0.426271	0.90212	-0.60713	-0.22979	0.368889	0.051162	-0.20236	-0.26663	0.692666	0.519464
	-1.1956	0.259805	-0.55253	0.078464	-0.0574	0.202769	-0.49458	0.314872	0.10269	-0.16578	-0.16181	0.500246	-0.00961	0.116268	-0.25288	-0.42385	-0.27403	0.669715	0.448348	0.932112	-0.5648	-0.20666	0.304159	0.059363	-0.18157	-0.29109	0.712284	0.511794
	-1.1712	0.303128	-0.58577	0.054226	-0.0664	0.210692	-0.49983	0.330581	0.103423	-0.18899	-0.17706	0.519892	-0.04292	0.119186	-0.29195	-0.40692	-0.2089	0.675585	0.465232	0.957534	-0.53201	-0.1821	0.234037	0.069548	-0.1514	-0.30751	0.727414	0.490211
	-1.1468	0.351001	-0.62184	0.014744	-0.05446	0.228043	-0.509	0.341696	0.095778	-0.22997	-0.19685	0.556432	-0.07738	0.124092	-0.32764	-0.38275	-0.14857	0.671555	0.482107	0.978393	-0.5086	-0.15732	0.15648	0.080454	-0.11875	-0.31632	0.743372	0.45908
	-1.1224	0.402532	-0.66063	-0.04017	-0.02442	0.256299	-0.5197	0.34729	0.079296	-0.27484	-0.22132	0.60734	-0.11197	0.131468	-0.35723	-0.35397	-0.09715	0.657034	0.496675	0.995941	-0.48517	-0.13508	0.070006	0.090525	-0.09134	-0.31942	0.765163	0.427917
	-1.098	0.456803	-0.70023	-0.10925	0.0183	0.294509	-0.53052	0.348107	0.054493	-0.31091	-0.24921	0.668022	-0.14412	0.139061	-0.37876	-0.32393	-0.05622	0.63257	0.499817	1.01214	-0.45149	-0.11796	-0.02421	0.097932	-0.07435	-0.31944	0.795379	0.407823
	-1.0736	0.513054	-0.73692	-0.1889	0.067178	0.340199	-0.54194	0.346242	0.023018	-0.33374	-0.27836	0.732124	-0.17026	0.143208	-0.39141	-0.29568	-0.0251	0.599549	0.480832	1.02882	-0.40575	-0.10676	-0.12271	0.100815	-0.06939	-0.31846	0.833485	0.40361
	-1.0492	0.57045	-0.7655	-0.27392	0.115977	0.390692	-0.55528	0.343912	-0.01249	-0.34715	-0.30684	0.795184	-0.18689	0.140015	-0.39555	-0.27184	-0.00218	0.559857	0.432925	1.04721	-0.3566	-0.1001	-0.22148	0.097474	-0.07568	-0.31743	0.876382	0.409692
	-1.0248	0.627563	-0.78116	-0.35929	0.159503	0.443969	-0.57108	0.343243	-0.04878	-0.3555	-0.33333	0.856956	-0.19201	0.127029	-0.39257	-0.25409	0.014544	0.515671	0.357042	1.06767	-0.31684	-0.09619	-0.31707	0.086352	-0.09175	-0.31708	0.920018	0.415089
	-1.0004	0.681893	-0.78179	-0.44162	0.194632	0.498451	-0.58869	0.346773	-0.08236	-0.35764	-0.35672	0.91842	-0.18581	0.10417	-0.38449	-0.24237	0.027853	0.469298	0.262925	1.08948	-0.29442	-0.09476	-0.40675	0.066197	-0.11555	-0.31876	0.960917	0.413411
	-0.976	0.729967	-0.767	-0.51907	0.221127	0.552334	-0.60708	0.357166	-0.1099	-0.35074	-0.37565	0.978034	-0.17085	0.072958	-0.37331	-0.23562	0.041635	0.423123	0.165507	1.11077	-0.28917	-0.09646	-0.48698	0.037012	-0.14451	-0.32315	0.996541	0.406168
	-0.9516	0.768164	-0.7361	-0.59068	0.240835	0.603586	-0.62562	0.376281	-0.12902	-0.33736	-0.38869	1.03159	-0.15227	0.036382	-0.36068	-0.23312	0.060283	0.379582	0.079025	1.12936	-0.29556	-0.10114	-0.55241	0.000826	-0.17686	-0.3287	1.02517	0.397527
	-0.9272	0.793695	-0.68846	-0.65685	0.255284	0.650507	-0.64397	0.404297	-0.13889	-0.32546	-0.39477	1.07431	-0.13719	-0.00079	-0.34828	-0.23436	0.086739	0.340667	0.01405	1.14409	-0.30569	-0.10854	-0.59739	-0.03921	-0.2119	-0.33231	1.04619	0.3908
	-0.9028	0.805079	-0.62476	-0.72014	0.263737	0.692129	-0.66144	0.439517	-0.14016	-0.32322	-0.39369	1.10379	-0.13304	-0.03349	-0.33815	-0.23793	0.121505	0.307246	-0.02338	1.15537	-0.31222	-0.11958	-0.61767	-0.08041	-0.24809	-0.33139	1.06043	0.389001
	-0.8784	0.802053	-0.5474	-0.78335	0.264205	0.72839	-0.67723	0.479332	-0.13444	-0.33466	-0.38617	1.12212	-0.14546	-0.0576	-0.33276	-0.24128	0.163908	0.279054	-0.03412	1.16442	-0.31108	-0.13527	-0.61109	-0.12122	-0.28309	-0.32456	1.07001	0.395341
	-0.854	0.785094	-0.45991	-0.8459	0.255867	0.760035	-0.69094	0.521011	-0.12358	-0.35578	-0.37386	1.13414	-0.17629	-0.07007	-0.33447	-0.24226	0.213805	0.255126	-0.02691	1.17212	-0.30074	-0.15486	-0.57885	-0.16082	-0.31532	-0.31104	1.07758	0.412227
	-0.8296	0.755011	-0.36736	-0.90321	0.239626	0.788096	-0.70307	0.561465	-0.10918	-0.37603	-0.35897	1.14352	-0.22227	-0.0696	-0.34423	-0.23989	0.271961	0.234003	-0.01387	1.17837	-0.27879	-0.17569	-0.52613	-0.19866	-0.34331	-0.29055	1.08551	0.439134
	-0.8052	0.712884	-0.27699	-0.95026	0.217503	0.813411	-0.71442	0.597108	-0.09229	-0.38618	-0.34372	1.15182	-0.27499	-0.05708	-0.36061	-0.23394	0.338596	0.214012	-0.00349	1.18245	-0.24155	-0.19471	-0.46139	-0.23483	-0.36406	-0.26328	1.09507	0.471863
	-0.7808	0.660282	-0.19625	-0.98507	0.192895	0.836621	-0.72508	0.623957	-0.07331	-0.38259	-0.3298	1.15962	-0.32268	-0.03458	-0.38018	-0.22538	0.411326	0.193748	0.003425	1.18396	-0.18925	-0.20986	-0.39523	-0.27071	-0.37442	-0.22998	1.10595	0.503554
	-0.7564	0.599328	-0.12939	-1.00819	0.170667	0.858173	-0.73407	0.637879	-0.05237	-0.3664	-0.31815	1.16763	-0.35329	-0.00451	-0.39913	-0.21665	0.484953	0.172367	0.012899	1.18341	-0.13085	-0.21987	-0.3376	-0.30852	-0.37397	-0.19198	1.11678	0.526932
	-0.732	0.53229	-0.07678	-1.01897	0.155285	0.877993	-0.73972	0.635965	-0.02974	-0.34397	-0.30886	1.17679	-0.3578	0.030021	-0.41487	-0.2104	0.553171	0.149626	0.03276	1.18212	-0.08107	-0.2238	-0.29409	-0.35017	-0.3652	-0.15187	1.12701	0.537983
	-0.7076	0.461028	-0.03736	-1.01442	0.14872	0.89549	-0.74014	0.618593	-0.00604	-0.32675	-0.30135	1.18684	-0.33284	0.064661	-0.4265	-0.20928	0.610276	0.125916	0.067413	1.18183	-0.05162	-0.22169	-0.26492	-0.39628	-0.35209	-0.11422	1.13841	0.537665
	-0.6832	0.386876	-0.01137	-0.99335	0.15097	0.910205	-0.73398	0.590065	0.0177	-0.32614	-0.29491	1.19578	-0.28128	0.094912	-0.43412	-0.21668	0.652355	0.102175	0.115833	1.18416	-0.04462	-0.21505	-0.24748	-0.44564	-0.33973	-0.08525	1.15451	0.530601
	-0.6588	0.310844	-6.54e-05	-0.96092	0.162092	0.92234	-0.72077	0.556656	0.040188	-0.34516	-0.28941	1.20222	-0.21026	0.118293	-0.4381	-0.2352	0.678021	0.079239	0.171154	1.19015	-0.05356	-0.20585	-0.23947	-0.49555	-0.33442	-0.07051	1.17859	0.522309
	-0.6344	0.233829	-0.00321	-0.92749	0.182779	0.932361	-0.69989	0.523873	0.060018	-0.37393	-0.28561	1.20774	-0.12758	0.134465	-0.43924	-0.26452	0.68884	0.056909	0.221566	1.20017	-0.06961	-0.19505	-0.24069	-0.5427	-0.34276	-0.07205	1.21184	0.514572
	-0.61	0.156869	-0.01859	-0.90326	0.213133	0.940131	-0.67011	0.495465	0.075806	-0.39755	-0.28478	1.21612	-0.03914	0.14364	-0.43854	-0.30235	0.688783	0.033959	0.255028	1.21368	-0.08685	-0.18232	-0.25233	-0.58398	-0.36992	-0.0877	1.25255	0.503644
	-0.5856	0.081586	-0.04367	-0.89431	0.251479	0.944698	-0.63132	0.473459	0.086293	-0.40959	-0.28795	1.23052	0.049963	0.146923	-0.43658	-0.34643	0.681904	0.008899	0.264244	1.22893	-0.10203	-0.16706	-0.2749	-0.61723	-0.41765	-0.11308	1.29619	0.485447
	-0.5612	0.010462	-0.07625	-0.90257	0.294088	0.945015	-0.58623	0.45817	0.090391	-0.41399	-0.29554	1.25111	0.132963	0.147672	-0.43307	-0.39462	0.670379	-0.01962	0.247386	1.2428	-0.11267	-0.14916	-0.30642	-0.6419	-0.48323	-0.14429	1.3367	0.459616
	-0.5368	-0.05355	-0.11458	-0.92746	0.335838	0.940635	-0.53908	0.449333	0.087209	-0.41587	-0.30722	1.27508	0.202565	0.149908	-0.42665	-0.4438	0.655056	-0.05251	0.207557	1.25162	-0.117	-0.12905	-0.34134	-0.65888	-0.5607	-0.17845	1.36844	0.427133
	-0.5124	-0.10792	-0.1574	-0.96639	0.37217	0.931845	-0.49285	0.447032	0.07634	-0.4168	-0.32183	1.2994	0.255298	0.154872	-0.41551	-0.48899	0.636657	-0.08967	0.153053	1.25246	-0.11232	-0.10807	-0.37241	-0.66956	-0.64264	-0.21308	1.38758	0.388988
	-0.488	-0.15116	-0.20345	-1.01381	0.400468	0.919591	-0.44752	0.450702	0.058122	-0.41737	-0.33782	1.32554	0.29308	0.160432	-0.39852	-0.52409	0.615604	-0.12987	0.095652	1.24412	-0.095	-0.08845	-0.39521	-0.67518	-0.72071	-0.24654	1.39237	0.348411
	-0.4636	-0.18316	-0.25151	-1.06156	0.419178	0.905009	-0.40135	0.458626	0.033539	-0.41804	-0.3536	1.36107	0.319549	0.162909	-0.37594	-0.54459	0.591525	-0.17137	0.045785	1.22704	-0.06533	-0.0725	-0.4103	-0.67715	-0.78698	-0.27846	1.38295	0.31097
	-0.4392	-0.20492	-0.30007	-1.10209	0.427136	0.888623	-0.35379	0.46931	0.004084	-0.41706	-0.36777	1.41403	0.335876	0.158578	-0.34956	-0.54938	0.564119	-0.2125	0.007255	1.2026	-0.02917	-0.06189	-0.42156	-0.67756	-0.83693	-0.30883	1.36139	0.279728
	-0.4148	-0.21813	-0.34623	-1.13172	0.424608	0.870008	-0.30641	0.48281	-0.02841	-0.40996	-0.37924	1.48512	0.340925	0.145354	-0.32224	-0.53964	0.534864	-0.2516	-0.02326	1.17261	0.005533	-0.05756	-0.43355	-0.67872	-0.87094	-0.33686	1.33102	0.252238
	-0.3904	-0.22476	-0.38569	-1.15106	0.414139	0.848228	-0.26154	0.500507	-0.06219	-0.3914	-0.38738	1.56517	0.33396	0.123769	-0.29677	-0.51706	0.507162	-0.28696	-0.05074	1.13914	0.031431	-0.06051	-0.44952	-0.6817	-0.89317	-0.36055	1.29498	0.226058
	-0.366	-0.22727	-0.41395	-1.16306	0.399822	0.822697	-0.22243	0.523736	-0.09588	-0.3578	-0.39219	1.64029	0.316155	0.09582	-0.27462	-0.48354	0.484289	-0.31731	-0.07703	1.10462	0.044725	-0.07204	-0.47003	-0.68556	-0.90945	-0.37727	1.25512	0.201952
	-0.3416	-0.22871	-0.42707	-1.17068	0.385122	0.794082	-0.19363	0.552971	-0.12828	-0.31039	-0.39401	1.69912	0.290563	0.063245	-0.25533	-0.44159	0.46769	-0.34245	-0.10139	1.07172	0.047049	-0.09248	-0.49206	-0.68746	-0.92521	-0.3852	1.21215	0.179494
	-0.3172	-0.23218	-0.42225	-1.1752	0.371134	0.764855	-0.17877	0.588319	-0.15817	-0.25539	-0.39312	1.73685	0.260933	0.027272	-0.23681	-0.39495	0.457259	-0.36341	-0.12367	1.04281	0.040812	-0.12099	-0.50934	-0.68332	-0.94443	-0.38462	1.1658	0.157774
	-0.2928	-0.23997	-0.39875	-1.17563	0.357382	0.739001	-0.17752	0.629926	-0.18459	-0.19866	-0.38941	1.75483	0.23016	-0.01035	-0.21607	-0.3482	0.452156	-0.38192	-0.14561	1.01964	0.025768	-0.1565	-0.51393	-0.66946	-0.96939	-0.37766	1.11506	0.139287
	-0.2684	-0.25339	-0.35981	-1.16856	0.343725	0.720504	-0.1854	0.677767	-0.20743	-0.14119	-0.38207	1.75761	0.19953	-0.04677	-0.18985	-0.30482	0.450974	-0.39949	-0.16796	1.00321	0.004977	-0.19731	-0.49868	-0.64468	-1.00062	-0.36659	1.05925	0.126441
	-0.244	-0.27282	-0.31332	-1.1497	0.33058	0.7114	-0.19628	0.73189	-0.22739	-0.08277	-0.36965	1.7512	0.168543	-0.07908	-0.15542	-0.26585	0.45213	-0.41661	-0.18652	0.993901	-0.01101	-0.24058	-0.46003	-0.61113	-1.03708	-0.35296	0.999538	0.117569
	-0.2196	-0.29754	-0.26861	-1.11733	0.318352	0.711015	-0.20532	0.792649	-0.24506	-0.02911	-0.35055	1.74282	0.135675	-0.10606	-0.11169	-0.23004	0.454527	-0.4328	-0.1958	0.991668	-0.01058	-0.28346	-0.3999	-0.57325	-1.07652	-0.33831	0.93935	0.108803
	-0.1952	-0.32578	-0.23146	-1.07484	0.307613	0.716573	-0.21126	0.860043	-0.25996	0.007635	-0.32363	1.73901	0.100309	-0.12834	-0.05965	-0.19505	0.457588	-0.44738	-0.1971	0.99568	0.009477	-0.32442	-0.32608	-0.536	-1.11505	-0.32454	0.883106	0.09515
	-0.1708	-0.35501	-0.2025	-1.02964	0.298926	0.724013	-0.21636	0.931942	-0.27044	0.015849	-0.28879	1.74278	0.063504	-0.14741	-0.00186	-0.15953	0.460922	-0.46025	-0.19759	1.00369	0.040549	-0.36376	-0.25	-0.50298	-1.14786	-0.31361	0.834109	0.072419
	-0.1464	-0.38226	-0.18043	-0.98889	0.292401	0.72882	-0.22457	1.00166	-0.27475	-0.00853	-0.24684	1.75237	0.026371	-0.16494	0.058337	-0.12428	0.463864	-0.4719	-0.20229	1.01216	0.068446	-0.40281	-0.18265	-0.47542	-1.1726	-0.30711	0.793292	0.043974
	-0.122	-0.40446	-0.16509	-0.95566	0.287943	0.727273	-0.23965	1.05836	-0.27183	-0.06094	-0.19915	1.76232	-0.01143	-0.18185	0.117239	-0.09216	0.465212	-0.48305	-0.2106	1.01755	0.084192	-0.44245	-0.13186	-0.45227	-1.19133	-0.30525	0.759584	0.02189
	-0.0976	-0.4188	-0.15598	-0.92928	0.285381	0.717598	-0.2635	1.09192	-0.26144	-0.13242	-0.14723	1.76589	-0.05126	-0.19732	0.171364	-0.06819	0.463246	-0.49452	-0.21873	1.0178	0.08786	-0.48234	-0.10183	-0.43117	-1.20875	-0.30694	0.731209	0.018438
	-0.0732	-0.42347	-0.14996	-0.90792	0.284465	0.700193	-0.29491	1.09777	-0.24403	-0.21321	-0.09265	1.75806	-0.09472	-0.20897	0.218192	-0.05804	0.456025	-0.50755	-0.22354	1.0128	0.083487	-0.52202	-0.09319	-0.4096	-1.22961	-0.31071	0.706786	0.037428
	-0.0488	-0.41799	-0.14192	-0.88958	0.285077	0.677113	-0.33037	1.07757	-0.22048	-0.29261	-0.03685	1.73845	-0.14306	-0.21408	0.256583	-0.06424	0.442333	-0.5239	-0.22284	1.00385	0.073703	-0.56185	-0.10303	-0.3858	-1.2563	-0.31488	0.685548	0.071648
	-0.0244	-0.40307	-0.12754	-0.87182	0.2866	0.651573	-0.36657	1.03705	-0.19187	-0.35974	0.01907	1.71172	-0.19601	-0.21146	0.286794	-0.08505	0.42228	-0.54548	-0.21119	0.992573	0.059227	-0.60267	-0.12572	-0.35957	-1.28693	-0.31821	0.666545	0.10728
	0	-0.3804	-0.10628	-0.85292	0.286955	0.627567	-0.40218	0.98355	-0.15959	-0.4078	0.074302	1.68468	-0.25068	-0.20266	0.309929	-0.11737	0.397031	-0.57387	-0.17903	0.980148	0.039924	-0.6453	-0.15538	-0.3326	-1.31774	-0.32099	0.647731	0.131692
	0.0244	-0.35245	-0.08162	-0.83408	0.283338	0.609374	-0.43732	0.924347	-0.12585	-0.43776	0.127899	1.66236	-0.30228	-0.19114	0.326885	-0.15886	0.36864	-0.60981	-0.1203	0.967196	0.014167	-0.6906	-0.18914	-0.30785	-1.34777	-0.32503	0.62629	0.136893
	0.0488	-0.32222	-0.05792	-0.82015	0.273563	0.600619	-0.47219	0.864852	-0.09365	-0.45599	0.178602	1.64526	-0.34561	-0.18058	0.338023	-0.20789	0.339723	-0.65242	-0.03967	0.954018	-0.02007	-0.73891	-0.22795	-0.28827	-1.37835	-0.33288	0.600069	0.118467
	0.0732	-0.29281	-0.03898	-0.8179	0.255976	0.602937	-0.50654	0.807161	-0.06627	-0.46742	0.225031	1.62983	-0.37664	-0.17327	0.344095	-0.26328	0.312639	-0.69905	0.049566	0.940766	-0.0614	-0.78874	-0.27361	-0.27585	-1.4089	-0.34729	0.568501	0.076884
	0.0976	-0.26704	-0.02842	-0.83198	0.229025	0.615342	-0.53977	0.751095	-0.04643	-0.47164	0.266039	1.61253	-0.39429	-0.17058	0.347085	-0.32385	0.289081	-0.74587	0.134556	0.92721	-0.10377	-0.83658	-0.32591	-0.27178	-1.43659	-0.37065	0.532219	0.019216
	0.122	-0.247	-0.02775	-0.86038	0.192053	0.634916	-0.57144	0.696574	-0.03588	-0.46431	0.301059	1.59281	-0.40107	-0.17399	0.349799	-0.38731	0.270227	-0.78875	0.209804	0.912412	-0.13839	-0.87808	-0.38188	-0.27659	-1.45918	-0.40357	0.492133	-0.04409
	0.1464	-0.23379	-0.03398	-0.8935	0.146525	0.657816	-0.6014	0.644969	-0.03543	-0.44183	0.330106	1.57264	-0.40094	-0.18402	0.35455	-0.45065	0.256439	-0.82402	0.274369	0.894563	-0.15616	-0.90978	-0.43679	-0.28959	-1.47604	-0.44339	0.44906	-0.10227
	0.1708	-0.22744	-0.04078	-0.9192	0.09609	0.679862	-0.62937	0.59906	-0.04507	-0.40612	0.353419	1.55481	-0.3966	-0.19896	0.362097	-0.51177	0.246698	-0.84893	0.325589	0.871025	-0.15106	-0.93102	-0.4865	-0.30822	-1.48768	-0.48485	0.404239	-0.14513
	0.1952	-0.22726	-0.04233	-0.92929	0.044541	0.697052	-0.65479	0.56178	-0.06353	-0.3663	0.371215	1.54134	-0.38892	-0.21594	0.371407	-0.56931	0.238764	-0.86203	0.360308	0.839011	-0.12269	-0.94408	-0.52795	-0.32786	-1.49515	-0.52254	0.360006	-0.16634
	0.2196	-0.23213	-0.03582	-0.92277	-0.00673	0.706337	-0.67709	0.534281	-0.0881	-0.33523	0.383647	1.53332	-0.37793	-0.23253	0.379952	-0.62164	0.229912	-0.86334	0.379197	0.796875	-0.07623	-0.95204	-0.55743	-0.34288	-1.49956	-0.55288	0.319621	-0.16565
	0.244	-0.24053	-0.02105	-0.90544	-0.05834	0.706387	-0.69598	0.515165	-0.11501	-0.32262	0.390709	1.53206	-0.36359	-0.24695	0.384468	-0.66826	0.217795	-0.85428	0.387658	0.745103	-0.02033	-0.95663	-0.57055	-0.34908	-1.50242	-0.57411	0.286282	-0.1476
	0.2684	-0.25048	0.001004	-0.88689	-0.11013	0.69775	-0.71072	0.502222	-0.14031	-0.32973	0.392126	1.5379	-0.34597	-0.25738	0.382075	-0.71065	0.201204	-0.83728	0.394935	0.686216	0.0364	-0.9582	-0.56544	-0.34556	-1.50625	-0.58515	0.262028	-0.11951
	0.2928	-0.25987	0.028876	-0.87585	-0.16012	0.681999	-0.71926	0.494435	-0.16071	-0.34924	0.387497	1.54878	-0.32492	-0.26208	0.370964	-0.75006	0.179883	-0.81544	0.411135	0.623637	0.087204	-0.95653	-0.54647	-0.33473	-1.51497	-0.5856	0.24713	-0.08841
	0.3172	-0.26715	0.061273	-0.87672	-0.20594	0.660593	-0.71881	0.491121	-0.17399	-0.37061	0.376695	1.56163	-0.30023	-0.26049	0.35037	-0.78521	0.153775	-0.79237	0.441865	0.560455	0.126662	-0.95122	-0.52349	-0.32102	-1.53306	-0.57672	0.240443	-0.05998
	0.3416	-0.27181	0.096501	-0.88925	-0.24589	0.634698	-0.70728	0.489728	-0.17942	-0.38802	0.360182	1.57366	-0.27305	-0.2535	0.32032	-0.81304	0.122804	-0.7718	0.485358	0.499138	0.152449	-0.94247	-0.50643	-0.30891	-1.56234	-0.56173	0.240504	-0.04085
	0.366	-0.27434	0.131367	-0.91085	-0.27822	0.605668	-0.68445	0.485852	-0.17803	-0.40236	0.339033	1.58212	-0.24646	-0.24241	0.281275	-0.83108	0.086682	-0.75685	0.534383	0.442069	0.167056	-0.93212	-0.50131	-0.30121	-1.5997	-0.54489	0.246028	-0.03839
	0.3904	-0.27581	0.162715	-0.93884	-0.30119	0.574975	-0.65231	0.475706	-0.17251	-0.41435	0.314754	1.58371	-0.22383	-0.22798	0.233613	-0.83828	0.044598	-0.74919	0.579178	0.391801	0.173974	-0.92374	-0.50992	-0.29867	-1.63863	-0.53004	0.255433	-0.05619
	0.4148	-0.27714	0.189657	-0.97013	-0.31538	0.543639	-0.61472	0.458531	-0.16643	-0.42012	0.289084	1.57346	-0.20707	-0.2098	0.177333	-0.83389	-0.00418	-0.74867	0.60964	0.350449	0.172001	-0.92103	-0.53027	-0.30116	-1.67206	-0.51918	0.266796	-0.09139
	0.4392	-0.27892	0.213046	-0.99944	-0.32371	0.512005	-0.57625	0.436605	-0.16335	-0.41581	0.26377	1.54462	-0.19568	-0.18689	0.112487	-0.81771	-0.05918	-0.75375	0.618794	0.318837	0.156462	-0.92608	-0.55747	-0.30857	-1.69372	-0.51205	0.278701	-0.13594
	0.4636	-0.28135	0.23469	-1.02033	-0.3274	0.479756	-0.54061	0.413017	-0.16601	-0.40185	0.240245	1.49188	-0.1871	-0.15939	0.040366	-0.79207	-0.11811	-0.76276	0.605884	0.296314	0.126544	-0.9387	-0.58586	-0.32063	-1.69872	-0.50719	0.290879	-0.17889
	0.488	-0.28447	0.258249	-1.02834	-0.32443	0.44575	-0.50935	0.389503	-0.17577	-0.38159	0.219371	1.41556	-0.17907	-0.12906	-0.03559	-0.7621	-0.17645	-0.77447	0.574787	0.28143	0.088878	-0.95691	-0.61151	-0.33618	-1.68527	-0.5034	0.304109	-0.21179
	0.5124	-0.28831	0.289338	-1.02288	-0.3133	0.408372	-0.48171	0.366138	-0.19243	-0.35984	0.201271	1.32219	-0.17234	-0.09813	-0.11048	-0.7339	-0.22801	-0.78763	0.530796	0.273106	0.054077	-0.97813	-0.63344	-0.35322	-1.65582	-0.50063	0.319584	-0.23385
	0.5368	-0.29279	0.333214	-1.0068	-0.29627	0.366613	-0.45621	0.342742	-0.21432	-0.34258	0.185021	1.22132	-0.17009	-0.0686	-0.18002	-0.71235	-0.26726	-0.8005	0.479921	0.271516	0.030524	-1.00071	-0.6523	-0.37002	-1.61653	-0.50015	0.338211	-0.24819
	0.5612	-0.2975	0.391385	-0.98452	-0.27818	0.320835	-0.43239	0.320313	-0.23884	-0.33402	0.168486	1.123	-0.17516	-0.04207	-0.24228	-0.69874	-0.29175	-0.81105	0.428272	0.277992	0.019384	-1.02426	-0.66758	-0.38644	-1.576	-0.50411	0.360223	-0.25698
	0.5856	-0.30162	0.46032	-0.95998	-0.26299	0.272834	-0.41186	0.30079	-0.26303	-0.33542	0.148727	1.03545	-0.18774	-0.01917	-0.2978	-0.69084	-0.30254	-0.8174	0.381616	0.294028	0.014596	-1.04909	-0.67751	-0.40443	-1.54273	-0.51461	0.385086	-0.26469
	0.61	-0.30449	0.534122	-0.9353	-0.2516	0.225529	-0.39781	0.286017	-0.28403	-0.34839	0.122941	0.962579	-0.20559	0.000407	-0.34824	-0.68665	-0.3033	-0.81829	0.345697	0.320015	0.008458	-1.07585	-0.6809	-0.42669	-1.52285	-0.53294	0.411578	-0.27952
	0.6344	-0.30614	0.607976	-0.91084	-0.24277	0.182249	-0.39286	0.27722	-0.29937	-0.37455	0.089455	0.904314	-0.22584	0.016878	-0.39477	-0.68706	-0.29817	-0.81372	0.324367	0.354633	-0.00186	-1.10528	-0.67747	-0.45429	-1.52037	-0.55999	0.438043	-0.30319
	0.6588	-0.30732	0.678012	-0.88663	-0.23579	0.145868	-0.39679	0.27415	-0.30727	-0.41099	0.048274	0.859238	-0.24582	0.030004	-0.43707	-0.69444	-0.28968	-0.80491	0.317539	0.395303	-0.01282	-1.13798	-0.66701	-0.48554	-1.53832	-0.5962	0.462686	-0.32495
	0.6832	-0.3091	0.738633	-0.86471	-0.23267	0.118216	-0.40611	0.274408	-0.3065	-0.44935	0.001014	0.827014	-0.26308	0.039704	-0.47394	-0.71105	-0.27889	-0.79364	0.321628	0.438899	-0.01839	-1.17403	-0.64938	-0.51707	-1.57814	-0.64028	0.483906	-0.33204
	0.7076	-0.31257	0.782139	-0.84931	-0.23758	0.099771	-0.41623	0.274533	-0.29603	-0.47847	-0.04939	0.810115	-0.27587	0.046229	-0.50477	-0.73816	-0.26663	-0.78146	0.330341	0.482043	-0.01451	-1.21281	-0.62534	-0.54573	-1.63735	-0.68816	0.500561	-0.31939
	0.732	-0.31822	0.80193	-0.84368	-0.25352	0.089735	-0.42453	0.27241	-0.27498	-0.48776	-0.09908	0.812555	-0.2836	0.04941	-0.53037	-0.77491	-0.25392	-0.76969	0.336436	0.521385	-0.00102	-1.25365	-0.59577	-0.56967	-1.70839	-0.73391	0.511703	-0.28896
	0.7564	-0.32523	0.795971	-0.84771	-0.27999	0.086562	-0.43079	0.269466	-0.24336	-0.47274	-0.14391	0.835601	-0.2869	0.049388	-0.5524	-0.81863	-0.24282	-0.75948	0.335431	0.554206	0.019162	-1.29675	-0.55927	-0.58858	-1.78119	-0.77207	0.515993	-0.24818
	0.7808	-0.33124	0.767856	-0.85892	-0.31353	0.088521	-0.43543	0.269951	-0.20298	-0.43952	-0.18035	0.876659	-0.28796	0.049034	-0.57257	-0.86717	-0.23699	-0.75182	0.327325	0.57882	0.042759	-1.34266	-0.51232	-0.6033	-1.84804	-0.79937	0.511897	-0.20551
	0.8052	-0.33311	0.725497	-0.87446	-0.34934	0.094069	-0.43903	0.27686	-0.15761	-0.39986	-0.20628	0.93251	-0.29015	0.053544	-0.59225	-0.91887	-0.23985	-0.7474	0.314215	0.594348	0.06896	-1.39111	-0.45325	-0.61492	-1.90613	-0.81528	0.498909	-0.16478
	0.8296	-0.3282	0.677613	-0.89187	-0.38256	0.102067	-0.44278	0.289066	-0.11186	-0.36094	-0.2217	0.999804	-0.29532	0.066501	-0.61254	-0.97073	-0.25251	-0.74651	0.297691	0.600373	0.098472	-1.44055	-0.38544	-0.6244	-1.95681	-0.82173	0.478275	-0.12962
	0.854	-0.3152	0.62937	-0.90962	-0.40965	0.111723	-0.4483	0.302503	-0.0701	-0.32405	-0.22892	1.07217	-0.30127	0.087897	-0.63404	-1.0195	-0.27419	-0.74903	0.278464	0.597035	0.129022	-1.48822	-0.31516	-0.63326	-2.00419	-0.8221	0.452036	-0.11102
	0.8784	-0.29436	0.581296	-0.92687	-0.4301	0.12221	-0.45797	0.312772	-0.03591	-0.29013	-0.23162	1.14032	-0.30352	0.115531	-0.65659	-1.06422	-0.30375	-0.75443	0.255699	0.585372	0.153963	-1.53057	-0.24741	-0.64399	-2.05298	-0.8198	0.42163	-0.12412
	0.9028	-0.26705	0.531908	-0.94223	-0.44618	0.132309	-0.47497	0.316744	-0.01169	-0.25993	-0.23336	1.19571	-0.29917	0.146131	-0.67901	-1.10559	-0.34026	-0.76161	0.226636	0.567473	0.165384	-1.56485	-0.18546	-0.65899	-2.10606	-0.81688	0.38755	-0.17784
	0.9272	-0.23526	0.480649	-0.95314	-0.46023	0.140344	-0.50133	0.313367	0.00183	-0.23077	-0.23643	1.23396	-0.28851	0.175206	-0.69949	-1.14293	-0.38245	-0.7693	0.188855	0.54629	0.156449	-1.59041	-0.13296	-0.67948	-2.1636	-0.81372	0.349678	-0.26822
	0.9516	-0.20094	0.429687	-0.95701	-0.47298	0.144245	-0.53614	0.303336	0.005585	-0.19973	-0.24172	1.25631	-0.27402	0.197136	-0.71631	-1.17321	-0.4282	-0.77703	0.141626	0.524973	0.123223	-1.60816	-0.09468	-0.70592	-2.22301	-0.80961	0.307754	-0.38052
	0.976	-0.16567	0.383666	-0.95295	-0.4837	0.141591	-0.57598	0.286836	0.001403	-0.16889	-0.24957	1.2669	-0.25892	0.206449	-0.72829	-1.19432	-0.47504	-0.78564	0.085662	0.505909	0.068701	-1.61954	-0.07427	-0.73868	-2.27944	-0.80312	0.262038	-0.49741
	1.0004	-0.13061	0.3474	-0.94228	-0.49018	0.129844	-0.61674	0.261738	-0.00898	-0.14401	-0.26056	1.26768	-0.24661	0.200375	-0.7347	-1.2077	-0.52095	-0.79668	0.025596	0.490018	0.003933	-1.62642	-0.07245	-0.77803	-2.32787	-0.79197	0.21379	-0.6071
	1.0248	-0.09665	0.32395	-0.92655	-0.48977	0.106905	-0.6549	0.225048	-0.02446	-0.12778	-0.2754	1.25705	-0.24084	0.180233	-0.73497	-1.21627	-0.56472	-0.81147	-0.02928	0.476766	-0.05697	-1.63105	-0.08754	-0.82368	-2.36576	-0.77384	0.165068	-0.7036
	1.0492	-0.0643	0.315034	-0.90563	-0.48107	0.071755	-0.68852	0.175798	-0.0446	-0.11395	-0.29448	1.23427	-0.24579	0.148959	-0.72868	-1.22159	-0.60567	-0.83056	-0.07256	0.464913	-0.102	-1.63585	-0.11667	-0.87435	-2.39261	-0.74762	0.117899	-0.782
	1.0736	-0.03372	0.322405	-0.8784	-0.46407	0.02495	-0.71774	0.116769	-0.06948	-0.08987	-0.31735	1.20316	-0.26546	0.107667	-0.71575	-1.22427	-0.64324	-0.85366	-0.1075	0.453564	-0.12484	-1.6433	-0.15749	-0.92757	-2.40737	-0.71392	0.073423	-0.83827
	1.098	-0.00485	0.347261	-0.84387	-0.43917	-0.03133	-0.74383	0.054069	-0.09925	-0.04861	-0.34251	1.16987	-0.30216	0.056393	-0.69662	-1.22483	-0.67679	-0.87985	-0.14277	0.4427	-0.12795	-1.65483	-0.2085	-0.9799	-2.40854	-0.67527	0.031859	-0.87048
	1.1224	0.022086	0.388372	-0.80074	-0.40637	-0.09379	-0.76837	-0.00637	-0.13385	0.001371	-0.36773	1.1382	-0.35581	-0.00261	-0.67271	-1.22311	-0.7058	-0.90791	-0.18425	0.432739	-0.11849	-1.66903	-0.26766	-1.02727	-2.39704	-0.63576	-0.00662	-0.87709
	1.1468	0.046465	0.441557	-0.74717	-0.36519	-0.15877	-0.79343	-0.06263	-0.17312	0.040926	-0.3904	1.10807	-0.42375	-0.06372	-0.64664	-1.21785	-0.73034	-0.93694	-0.2316	0.42387	-0.1002	-1.68148	-0.33249	-1.06575	-2.37744	-0.60056	-0.04121	-0.857
	1.1712	0.06781	0.50011	-0.68223	-0.3162	-0.22275	-0.82185	-0.11643	-0.21715	0.05456	-0.40796	1.07796	-0.49965	-0.11889	-0.62167	-1.2083	-0.7505	-0.96673	-0.27964	0.416023	-0.07397	-1.6864	-0.40042	-1.09244	-2.3558	-0.57512	-0.07055	-0.81127
	1.1956	0.086751	0.555059	-0.60777	-0.26304	-0.28276	-0.85647	-0.16974	-0.26618	0.03745	-0.41833	1.04751	-0.57306	-0.15958	-0.60116	-1.19665	-0.76626	-0.99767	-0.32111	0.409373	-0.04336	-1.67862	-0.46722	-1.10626	-2.33732	-0.56322	-0.09324	-0.74438
	1.22	0.105322	0.596906	-0.52807	-0.21273	-0.33705	-0.89812	-0.22326	-0.32016	-0.00735	-0.42039	1.01796	-0.63148	-0.17928	-0.58799	-1.18792	-0.77801	-1.02992	-0.3497	0.404763	-0.0137	-1.65537	-0.52693	-1.10855	-2.32585	-0.56533	-0.10845	-0.66446
	1.2444	0.126169	0.618414	-0.44743	-0.17324	-0.38584	-0.9441	-0.27723	-0.37824	-0.07281	-0.41408	0.990735	-0.664	-0.1753	-0.58419	-1.18565	-0.78663	-1.06314	-0.36572	0.403697	0.009975	-1.61724	-0.57463	-1.10312	-2.32289	-0.57912	-0.11622	-0.58018
	1.2688	0.151364	0.615803	-0.36845	-0.15012	-0.43081	-0.98912	-0.33203	-0.43857	-0.15158	-0.4002	0.965949	-0.66587	-0.14894	-0.59069	-1.1884	-0.79338	-1.09709	-0.37941	0.407981	0.023327	-1.56823	-0.60796	-1.09544	-2.32671	-0.6015	-0.11767	-0.49729
	1.2932	0.181679	0.58955	-0.29201	-0.14532	-0.47395	-1.02838	-0.38743	-0.49908	-0.23835	-0.3804	0.942112	-0.64188	-0.10384	-0.60749	-1.19055	-0.79944	-1.1323	-0.40346	0.419032	0.026521	-1.51486	-0.62644	-1.09161	-2.33286	-0.62992	-0.11518	-0.42024
	1.3176	0.216319	0.545135	-0.21855	-0.15766	-0.51707	-1.05912	-0.44221	-0.55875	-0.32985	-0.35725	0.916141	-0.60508	-0.0443	-0.63398	-1.18567	-0.80519	-1.16989	-0.44048	0.436709	0.025277	-1.46405	-0.63128	-1.09738	-2.33416	-0.66248	-0.11214	-0.35689
	1.342	0.252887	0.490676	-0.15047	-0.1831	-0.56166	-1.08004	-0.49445	-0.61827	-0.42454	-0.33418	0.882106	-0.571	0.024582	-0.66947	-1.16967	-0.81002	-1.21098	-0.47996	0.458446	0.023406	-1.42137	-0.62537	-1.11686	-2.32085	-0.69782	-0.11153	-0.31767
	1.3664	0.28774	0.432439	-0.09366	-0.21574	-0.60857	-1.09103	-0.54174	-0.67941	-0.51864	-0.31517	0.831608	-0.55224	0.096598	-0.71343	-1.14201	-0.81276	-1.25627	-0.5064	0.479573	0.01578	-1.39049	-0.61081	-1.15112	-2.28339	-0.73513	-0.1146	-0.30745
	1.3908	0.316776	0.372921	-0.05636	-0.25018	-0.65752	-1.09346	-0.58155	-0.74374	-0.60272	-0.3041	0.759598	-0.55661	0.166529	-0.76536	-1.10416	-0.81226	-1.30547	-0.50799	0.494452	-0.00878	-1.37295	-0.58538	-1.19795	-2.21555	-0.77372	-0.12085	-0.32059
	1.4152	0.33624	0.312153	-0.04586	-0.28324	-0.70669	-1.09001	-0.61158	-0.81119	-0.66746	-0.30406	0.669829	-0.58682	0.233362	-0.82389	-1.05791	-0.80825	-1.3567	-0.4803	0.497632	-0.05722	-1.36831	-0.54316	-1.25324	-2.1157	-0.81231	-0.12939	-0.34465
	1.4396	0.343321	0.249244	-0.06526	-0.31294	-0.75266	-1.08428	-0.62979	-0.87926	-0.70997	-0.31684	0.572642	-0.64019	0.300688	-0.88627	-1.00598	-0.80217	-1.40642	-0.42759	0.484875	-0.12479	-1.37551	-0.47935	-1.31222	-1.98764	-0.84881	-0.14043	-0.36634
	1.464	0.33651	0.182976	-0.11208	-0.3364	-0.79098	-1.08019	-0.6337	-0.94323	-0.73184	-0.34288	0.478697	-0.70982	0.373132	-0.94874	-0.95302	-0.79617	-1.45031	-0.36304	0.454055	-0.19648	-1.39362	-0.39383	-1.36984	-1.841	-0.88062	-0.15548	-0.3744
	1.4884	0.315553	0.112778	-0.17985	-0.35008	-0.81739	-1.08114	-0.61973	-0.99749	-0.7357	-0.3816	0.394753	-0.78771	0.452479	-1.00772	-0.90481	-0.79112	-1.48448	-0.30473	0.40566	-0.25531	-1.42177	-0.29142	-1.42146	-1.68951	-0.90524	-0.17615	-0.36186
	1.5128	0.28114	0.041077	-0.26156	-0.3515	-0.82908	-1.08921	-0.58414	-1.03713	-0.72586	-0.4322	0.322407	-0.86708	0.53732	-1.06068	-0.86617	-0.786	-1.50632	-0.2658	0.342746	-0.29145	-1.45926	-0.1792	-1.46393	-1.54657	-0.92101	-0.20309	-0.32675
	1.5372	0.234873	-0.02583	-0.3515	-0.34004	-0.82549	-1.10334	-0.5261	-1.05917	-0.71099	-0.49388	0.258499	-0.9423	0.625449	-1.10661	-0.83848	-0.77943	-1.5144	-0.24846	0.2707	-0.30479	-1.50527	-0.06244	-1.49604	-1.42081	-0.92759	-0.23551	-0.26826
	1.5616	0.179718	-0.08112	-0.44487	-0.31686	-0.8084	-1.11768	-0.4502	-1.06263	-0.7028	-0.5652	0.19671	-1.00885	0.716114	-1.14617	-0.81803	-0.77113	-1.50781	-0.24814	0.19681	-0.30019	-1.55715	0.055976	-1.51856	-1.31449	-0.92584	-0.27098	-0.18584
	1.586	0.120355	-0.12133	-0.53711	-0.28432	-0.7816	-1.12285	-0.36434	-1.04833	-0.7109	-0.64331	0.130842	-1.06437	0.810027	-1.18115	-0.79637	-0.76207	-1.48621	-0.25895	0.128478	-0.28164	-1.6104	0.172647	-1.53413	-1.22466	-0.91704	-0.30557	-0.08485
	1.6104	0.062684	-0.14618	-0.62406	-0.24503	-0.74997	-1.10981	-0.27586	-1.01846	-0.74024	-0.72401	0.058372	-1.10944	0.906828	-1.21377	-0.7626	-0.75432	-1.45013	-0.27445	0.070143	-0.2511	-1.66097	0.28212	-1.54668	-1.14561	-0.9026	-0.33478	0.023392
	1.6348	0.012209	-0.15619	-0.70305	-0.20146	-0.7185	-1.07242	-0.18978	-0.97599	-0.78855	-0.80274	-0.01812	-1.14657	1.00281	-1.246	-0.70717	-0.75057	-1.4009	-0.28771	0.021534	-0.21129	-1.70704	0.378664	-1.56021	-1.07088	-0.88447	-0.35503	0.128187
	1.6592	-0.02816	-0.15252	-0.77358	-0.15653	-0.69142	-1.00756	-0.10905	-0.92403	-0.84205	-0.87584	-0.09183	-1.17778	1.09167	-1.27907	-0.62606	-0.75241	-1.34064	-0.29336	-0.02118	-0.16722	-1.74866	0.457893	-1.57788	-0.99456	-0.86546	-0.3645	0.223319
	1.6836	-0.05943	-0.13765	-0.83573	-0.11367	-0.67153	-0.91477	-0.03579	-0.8655	-0.88159	-0.94143	-0.1547	-1.20287	1.16715	-1.31308	-0.52282	-0.75898	-1.27205	-0.28983	-0.06293	-0.12572	-1.78591	0.516387	-1.60194	-0.9136	-0.849	-0.36322	0.308999
	1.708	-0.08582	-0.11463	-0.88769	-0.07578	-0.6603	-0.79672	0.027693	-0.80287	-0.89838	-0.99939	-0.2023	-1.22039	1.22546	-1.34739	-0.40706	-0.76789	-1.19767	-0.27806	-0.10779	-0.09533	-1.81736	0.550642	-1.63369	-0.83041	-0.83864	-0.35293	0.390658
	1.7324	-0.11252	-0.08628	-0.9248	-0.04523	-0.65807	-0.66059	0.079182	-0.73828	-0.899	-1.05072	-0.23639	-1.22951	1.26639	-1.38141	-0.29084	-0.77753	-1.11903	-0.25811	-0.15811	-0.08395	-1.84027	0.556855	-1.6733	-0.75322	-0.83781	-0.33652	0.470307
	1.7568	-0.14364	-0.05545	-0.94055	-0.02404	-0.66441	-0.51851	0.117474	-0.6739	-0.89779	-1.09648	-0.26317	-1.22964	1.29192	-1.41471	-0.18558	-0.78852	-1.03701	-0.22924	-0.21459	-0.09407	-1.85172	0.533468	-1.71952	-0.69362	-0.84899	-0.31708	0.540247
	1.7812	-0.18127	-0.0247	-0.92973	-0.01228	-0.67862	-0.38569	0.143017	-0.61188	-0.90888	-1.13707	-0.28994	-1.21896	1.30457	-1.44674	-0.09953	-0.80303	-0.95354	-0.19247	-0.27656	-0.12129	-1.84983	0.484904	-1.76988	-0.66198	-0.8728	-0.29694	0.58887
	1.8056	-0.22552	0.004337	-0.89172	-0.00744	-0.7004	-0.27741	0.157793	-0.55392	-0.94038	-1.17215	-0.32235	-1.19537	1.30742	-1.47698	-0.03604	-0.82324	-0.87291	-0.15068	-0.342	-0.1574	-1.83507	0.421126	-1.82135	-0.66221	-0.90795	-0.27719	0.609341
	1.83	-0.27526	0.03198	-0.83022	-0.00615	-0.73008	-0.20641	0.16432	-0.50078	-0.99254	-1.20115	-0.36197	-1.16	1.30375	-1.50515	0.005227	-0.85075	-0.80108	-0.10667	-0.40767	-0.19487	-1.80972	0.352959	-1.87079	-0.68934	-0.95207	-0.25846	0.601557
	1.8544	-0.32857	0.061649	-0.75051	-0.00595	-0.76819	-0.17989	0.165022	-0.45217	-1.05837	-1.22379	-0.40545	-1.11929	1.29565	-1.53107	0.025001	-0.88631	-0.74363	-0.06245	-0.46939	-0.2311	-1.77663	0.287999	-1.91495	-0.73145	-1.00314	-0.24184	0.571357
	1.8788	-0.38335	0.098419	-0.6593	-0.00575	-0.81449	-0.19734	0.162037	-0.4076	-1.12363	-1.24037	-0.44658	-1.08314	1.28415	-1.55463	0.023997	-0.92952	-0.70414	-0.02034	-0.52255	-0.26913	-1.73855	0.229655	-1.95075	-0.77408	-1.05991	-0.22879	0.528211
	1.9032	-0.43769	0.14536	-0.56618	-0.00493	-0.86728	-0.25022	0.156474	-0.36765	-1.17143	-1.25153	-0.47963	-1.06085	1.27059	-1.57578	0.005407	-0.97846	-0.68317	0.014688	-0.56318	-0.31316	-1.69808	0.178767	-1.9764	-0.80489	-1.12074	-0.22042	0.480169
	1.9276	-0.48998	0.201751	-0.48278	-0.00193	-0.92335	-0.32435	0.1484	-0.33383	-1.19088	-1.25787	-0.50198	-1.05731	1.25721	-1.59441	-0.0247	-1.02952	-0.67793	0.034965	-0.58922	-0.36481	-1.65818	0.13453	-1.99241	-0.81845	-1.18334	-0.21707	0.432406
	1.952	-0.53862	0.26443	-0.41966	0.005797	-0.97867	-0.40465	0.138264	-0.30715	-1.18179	-1.25982	-0.51432	-1.07041	1.24738	-1.61034	-0.05949	-1.07849	-0.68319	0.035052	-0.60102	-0.42214	-1.62223	0.094408	-2.00144	-0.81868	-1.24566	-0.21818	0.388016
	1.9764	-0.58197	0.329666	-0.38321	0.020438	-1.02947	-0.47966	0.127417	-0.28697	-1.15481	-1.25767	-0.5188	-1.09131	1.24494	-1.62344	-0.09314	-1.1219	-0.69369	0.016662	-0.60067	-0.47874	-1.59327	0.056743	-2.00711	-0.81504	-1.3061	-0.22253	0.343817
	2.0008	-0.61864	0.394189	-0.37436	0.043065	-1.07307	-0.54329	0.116862	-0.27122	-1.1282	-1.2518	-0.51839	-1.10813	1.25269	-1.63345	-0.12191	-1.15786	-0.70569	-0.0125	-0.59115	-0.5243	-1.57325	0.024281	-2.01242	-0.81579	-1.36337	-0.22841	0.291597
	2.0252	-0.64758	0.456784	-0.38977	0.073377	-1.1077	-0.59444	0.106632	-0.2574	-1.11842	-1.24262	-0.51824	-1.11096	1.27118	-1.63966	-0.14505	-1.18644	-0.71679	-0.04424	-0.57568	-0.55027	-1.56196	0.002885	-2.01896	-0.8246	-1.41712	-0.23373	0.230153
	2.0496	-0.66796	0.519406	-0.42315	0.109536	-1.13214	-0.63497	0.096717	-0.24358	-1.12907	-1.23048	-0.52354	-1.09434	1.29838	-1.64085	-0.16462	-1.2098	-0.72528	-0.07225	-0.55757	-0.55687	-1.55652	-0.00341	-2.02703	-0.84177	-1.46832	-0.23626	0.167917
	2.074	-0.67915	0.585004	-0.46506	0.148215	-1.14546	-0.66703	0.087808	-0.22874	-1.1499	-1.21555	-0.53511	-1.05569	1.33125	-1.63572	-0.18379	-1.23142	-0.73005	-0.09146	-0.5403	-0.55193	-1.55334	0.004962	-2.03578	-0.86541	-1.51819	-0.23453	0.113376
	2.0984	-0.6809	0.653979	-0.50286	0.18521	-1.14672	-0.69159	0.08095	-0.21264	-1.16751	-1.1975	-0.55118	-0.99347	1.36875	-1.62336	-0.20428	-1.25454	-0.73071	-0.10072	-0.52766	-0.5429	-1.55041	0.02418	-2.04384	-0.89057	-1.56656	-0.22848	0.071782
	2.1228	-0.67361	0.723263	-0.52353	0.216277	-1.13483	-0.70893	0.076894	-0.19578	-1.17623	-1.17546	-0.57319	-0.90886	1.41289	-1.60353	-0.22448	-1.28054	-0.72725	-0.10242	-0.5235	-0.53275	-1.54737	0.048832	-2.04987	-0.90958	-1.61172	-0.21918	0.047337
	2.1472	-0.65826	0.787886	-0.51707	0.237576	-1.10879	-0.71995	0.076129	-0.17927	-1.17949	-1.14842	-0.60455	-0.80852	1.4661	-1.57678	-0.24044	-1.30822	-0.71947	-0.09648	-0.5311	-0.52041	-1.54362	0.074234	-2.05288	-0.91501	-1.65237	-0.20775	0.043098
	2.1716	-0.63593	0.842694	-0.47783	0.246558	-1.06797	-0.727	0.078943	-0.1645	-1.18245	-1.11591	-0.6451	-0.70337	1.52818	-1.54415	-0.24943	-1.33493	-0.70688	-0.0806	-0.55228	-0.5011	-1.53729	0.099112	-2.05227	-0.90331	-1.68915	-0.1942	0.060051
	2.196	-0.60723	0.883233	-0.40493	0.243274	-1.01237	-0.73331	0.084603	-0.15235	-1.18574	-1.07813	-0.69029	-0.60451	1.5964	-1.50638	-0.25263	-1.35848	-0.68894	-0.05734	-0.5864	-0.46914	-1.52646	0.125319	-2.04747	-0.87529	-1.72402	-0.17716	0.093983
	2.2204	-0.57214	0.906887	-0.30343	0.230129	-0.94276	-0.74192	0.090916	-0.14288	-1.18731	-1.03554	-0.73502	-0.51996	1.66742	-1.46357	-0.25388	-1.37833	-0.66524	-0.03813	-0.62993	-0.42276	-1.51008	0.15509	-2.03731	-0.83256	-1.75821	-0.15455	0.133462
	2.2448	-0.53048	0.914712	-0.18416	0.210627	-0.8611	-0.75505	0.095018	-0.1355	-1.18749	-0.9885	-0.77634	-0.45339	1.73901	-1.41567	-0.25618	-1.39505	-0.63597	-0.03924	-0.67739	-0.36459	-1.48753	0.190002	-2.01977	-0.77498	-1.79063	-0.12495	0.1649
	2.2692	-0.48256	0.911216	-0.06067	0.18907	-0.77069	-0.77331	0.093622	-0.12951	-1.18948	-0.93748	-0.81347	-0.40422	1.80955	-1.36315	-0.26043	-1.40905	-0.60211	-0.07192	-0.72301	-0.29858	-1.45877	0.231634	-1.99191	-0.70164	-1.81872	-0.08883	0.178834
	2.2936	-0.42959	0.901425	0.054396	0.170378	-0.67577	-0.79467	0.082339	-0.12439	-1.19587	-0.88329	-0.84706	-0.36938	1.87478	-1.30717	-0.26626	-1.42032	-0.56481	-0.13567	-0.76209	-0.22833	-1.42527	0.28088	-1.95021	-0.61312	-1.8403	-0.04831	0.171284
	2.318	-0.37379	0.888945	0.151828	0.158465	-0.58072	-0.81582	0.056302	-0.11947	-1.20575	-0.82717	-0.87846	-0.34606	1.92643	-1.24962	-0.27283	-1.42884	-0.52461	-0.22154	-0.79165	-0.15853	-1.39012	0.335834	-1.89178	-0.51421	-1.85433	-0.00583	0.142876
	2.3424	-0.31806	0.875961	0.227313	0.154473	-0.4896	-0.83495	0.012103	-0.11368	-1.21335	-0.77053	-0.90753	-0.33243	1.95596	-1.19284	-0.27977	-1.43446	-0.48119	-0.32026	-0.81062	-0.0968	-1.35674	0.39151	-1.8159	-0.41436	-1.86106	0.037095	0.099482
	2.3668	-0.26503	0.863452	0.280736	0.156666	-0.40562	-0.85181	-0.05069	-0.10554	-1.2109	-0.71468	-0.92986	-0.3258	1.95889	-1.13897	-0.28766	-1.43725	-0.434	-0.42511	-0.81959	-0.05116	-1.32718	0.44193	-1.72442	-0.32343	-1.86243	0.08005	0.052284
	2.3912	-0.21625	0.851325	0.314112	0.16095	-0.33057	-0.86549	-0.12894	-0.09324	-1.19535	-0.66057	-0.93899	-0.32225	1.9359	-1.08939	-0.29612	-1.43806	-0.38284	-0.52868	-0.82042	-0.02493	-1.30195	0.48215	-1.621	-0.24679	-1.86127	0.123335	0.011507
	2.4156	-0.17208	0.838491	0.330714	0.161725	-0.26429	-0.87312	-0.21683	-0.07473	-1.17073	-0.60872	-0.93248	-0.31912	1.89194	-1.04503	-0.30108	-1.43821	-0.3279	-0.62231	-0.81565	-0.0174	-1.28081	0.509468	-1.51047	-0.1835	-1.8595	0.167321	-0.02032
	2.44	-0.13208	0.823304	0.33483	0.154148	-0.20475	-0.87103	-0.30768	-0.04819	-1.14283	-0.55943	-0.91383	-0.31655	1.83497	-1.00694	-0.29495	-1.4387	-0.2698	-0.69869	-0.80772	-0.02801	-1.26315	0.523582	-1.39835	-0.12783	-1.85663	0.211818	-0.04572
	2.4644	-0.09529	0.804748	0.331034	0.136563	-0.14868	-0.85674	-0.39488	-0.01251	-1.11469	-0.51301	-0.88858	-0.31558	1.77403	-0.97629	-0.27078	-1.43877	-0.20946	-0.75153	-0.79809	-0.05561	-1.24784	0.526239	-1.29045	-0.07246	-1.84968	0.255853	-0.0671
	2.4888	-0.0605	0.783673	0.323068	0.110922	-0.09239	-0.83001	-0.4722	0.032449	-1.08738	-0.46963	-0.85966	-0.31477	1.71794	-0.9536	-0.22653	-1.43441	-0.14816	-0.77445	-0.78664	-0.09342	-1.23343	0.521294	-1.19208	-0.01172	-1.83429	0.297768	-0.08545
	2.5132	-0.02614	0.763313	0.313284	0.081181	-0.03233	-0.79212	-0.5341	0.085743	-1.06155	-0.42903	-0.82618	-0.30938	1.67426	-0.93817	-0.16557	-1.42038	-0.0878	-0.76519	-0.77181	-0.12725	-1.21772	0.51378	-1.10717	0.05608	-1.80593	0.335534	-0.09994
	2.5376	0.009647	0.748058	0.303766	0.052241	0.034389	-0.74392	-0.57696	0.145093	-1.03497	-0.39029	-0.78632	-0.29422	1.64739	-0.92843	-0.09359	-1.39429	-0.03094	-0.73186	-0.7515	-0.1419	-1.19801	0.508344	-1.03775	0.128399	-1.76073	0.366921	-0.1093
	2.562	0.048526	0.740369	0.297879	0.030071	0.109028	-0.68442	-0.60065	0.206933	-1.00123	-0.35224	-0.73963	-0.26724	1.63685	-0.92295	-0.01491	-1.35784	0.019768	-0.69336	-0.72465	-0.12827	-1.17289	0.509641	-0.98407	0.200866	-1.69669	0.389605	-0.11239
	2.5864	0.091419	0.738811	0.300031	0.020425	0.190452	-0.61181	-0.60812	0.26704	-0.95848	-0.31454	-0.68639	-0.22945	1.63842	-0.92133	0.06923	-1.31515	0.062319	-0.67173	-0.69223	-0.08271	-1.14385	0.522859	-0.94528	0.270279	-1.61511	0.401753	-0.106
	2.6108	0.138047	0.739026	0.314208	0.026713	0.275282	-0.52573	-0.60301	0.321531	-0.91579	-0.27852	-0.62643	-0.18308	1.64667	-0.92398	0.160285	-1.27067	0.095718	-0.68059	-0.6568	-0.00481	-1.11488	0.551395	-0.92035	0.335552	-1.52051	0.402688	-0.08761
	2.6352	0.186891	0.736068	0.343144	0.050246	0.358937	-0.42887	-0.58777	0.367766	-0.88056	-0.24692	-0.55915	-0.13266	1.65725	-0.93149	0.260155	-1.22777	0.120085	-0.71814	-0.62113	0.100945	-1.09115	0.594108	-0.90847	0.396165	-1.41881	0.392867	-0.0595
	2.6596	0.235764	0.726865	0.388419	0.092286	0.436729	-0.32674	-0.56348	0.404829	-0.8454	-0.22266	-0.48375	-0.08697	1.66803	-0.94404	0.367857	-1.18838	0.136499	-0.77191	-0.58732	0.224267	-1.0778	0.645937	-0.90883	0.45063	-1.31546	0.3737	-0.02576
	2.684	0.282771	0.711695	0.450451	0.154928	0.504512	-0.2259	-0.53084	0.43347	-0.79692	-0.20759	-0.39799	-0.05615	1.67913	-0.96112	0.479003	-1.15351	0.146342	-0.82729	-0.55706	0.350817	-1.07857	0.701316	-0.91982	0.496158	-1.21432	0.347602	0.010794
	2.7084	0.32688	0.693299	0.527536	0.240157	0.559125	-0.13177	-0.49091	0.455458	-0.73424	-0.20198	-0.29746	-0.04635	1.69212	-0.98151	0.588101	-1.12394	0.150514	-0.8698	-0.53211	0.464584	-1.09395	0.756483	-0.9385	0.528855	-1.11814	0.31771	0.047687
	2.7328	0.367776	0.675279	0.614366	0.348186	0.598678	-0.04804	-0.44422	0.472388	-0.67372	-0.20486	-0.17817	-0.05806	1.70831	-1.00379	0.691004	-1.10089	0.14911	-0.88768	-0.51401	0.550535	-1.12008	0.808953	-0.96054	0.545307	-1.03014	0.287067	0.082788
	2.7572	0.405599	0.661485	0.70197	0.47576	0.622569	0.023395	-0.3905	0.484753	-0.63538	-0.2143	-0.03926	-0.08785	1.72704	-1.02654	0.786954	-1.0856	0.141659	-0.87813	-0.50341	0.597238	-1.14983	0.857178	-0.98108	0.54452	-0.95522	0.257791	0.11609
	2.7816	0.441015	0.655686	0.78013	0.615885	0.631317	0.083017	-0.33091	0.4919	-0.62665	-0.22713	0.11684	-0.12941	1.74525	-1.04832	0.877693	-1.07808	0.127709	-0.84818	-0.49989	0.600251	-1.17584	0.901826	-0.99617	0.528041	-0.89923	0.230801	0.149422
	2.806	0.475261	0.661101	0.84017	0.76013	0.626518	0.133615	-0.2694	0.492609	-0.64149	-0.2389	0.283512	-0.17352	1.75923	-1.0678	0.963607	-1.07729	0.107476	-0.81089	-0.50228	0.564884	-1.19371	0.945542	-1.00394	0.499477	-0.86692	0.206213	0.182418
	2.8304	0.509746	0.678695	0.876262	0.900907	0.61089	0.179035	-0.21131	0.485909	-0.66978	-0.24466	0.447688	-0.20874	1.7671	-1.08417	1.04232	-1.08255	0.082224	-0.7826	-0.50881	0.504217	-1.20385	0.990666	-1.00454	0.464103	-0.85974	0.183854	0.208786
	2.8548	0.545534	0.703386	0.886039	1.03138	0.587907	0.22298	-0.16171	0.471736	-0.70117	-0.24055	0.5908	-0.22446	1.76989	-1.0974	1.11061	-1.09399	0.054274	-0.776	-0.51694	0.433586	-1.21127	1.03783	-0.9992	0.427034	-0.87508	0.163454	0.218919
	2.8792	0.583134	0.722132	0.87047	1.14526	0.561304	0.268204	-0.12436	0.451009	-0.72507	-0.22498	0.694851	-0.21494	1.77077	-1.10851	1.16618	-1.11178	0.026906	-0.79051	-0.52352	0.364849	-1.22273	1.08621	-0.98941	0.391017	-0.90708	0.144695	0.206821
	2.9036	0.622396	0.719282	0.832419	1.23808	0.535164	0.315171	-0.101	0.425085	-0.73571	-0.19881	0.749656	-0.18124	1.77341	-1.11942	1.20892	-1.13484	0.003976	-0.81242	-0.52532	0.303075	-1.24282	1.13412	-0.97664	0.356715	-0.94805	0.127243	0.173923
	2.928	0.662493	0.686414	0.775692	1.30895	0.514003	0.361041	-0.0912	0.395172	-0.73505	-0.16451	0.756984	-0.12981	1.78041	-1.13215	1.24101	-1.15988	-0.01116	-0.82643	-0.51995	0.249336	-1.27117	1.17956	-0.96212	0.324099	-0.99056	0.110697	0.127077
	2.9524	0.702267	0.627024	0.704395	1.36179	0.501845	0.400853	-0.09322	0.362158	-0.72829	-0.12521	0.729254	-0.06914	1.79223	-1.14759	1.26421	-1.18173	-0.01675	-0.82608	-0.50647	0.204943	-1.30244	1.22076	-0.94656	0.292044	-1.02939	0.094828	0.073443
	2.9768	0.740647	0.552616	0.621184	1.40481	0.500842	0.430114	-0.10493	0.32662	-0.7199	-0.08401	0.683568	-0.00651	1.80786	-1.16496	1.27796	-1.19458	-0.01308	-0.81543	-0.48542	0.170205	-1.32948	1.25598	-0.92994	0.257185	-1.06225	0.080257	0.017948
	3.0012	0.776874	0.475883	0.527165	1.44784	0.510763	0.446417	-0.12413	0.288634	-0.71113	-0.04359	0.635617	0.054267	1.82679	-1.18204	1.28041	-1.19403	-0.00228	-0.8044	-0.45847	0.142438	-1.34642	1.28419	-0.91199	0.214522	-1.08923	0.068724	-0.03266
	3.0256	0.810565	0.406824	0.424507	1.50011	0.529568	0.4502	-0.14762	0.247575	-0.69635	-0.00602	0.597324	0.11349	1.85117	-1.19618	1.26956	-1.17827	0.011981	-0.8023	-0.42789	0.117485	-1.34912	1.30676	-0.8929	0.160214	-1.11173	0.0623	-0.06539
	3.05	0.841521	0.353154	0.317487	1.56992	0.554293	0.444858	-0.1709	0.202232	-0.6659	0.027279	0.576803	0.174154	1.88644	-1.20556	1.24398	-1.14724	0.025339	-0.81283	-0.39635	0.090009	-1.33457	1.32708	-0.87379	0.094081	-1.13097	0.062239	-0.06782
	3.0744	0.869123	0.322211	0.211365	1.66326	0.581724	0.434551	-0.189	0.151397	-0.61315	0.055283	0.577645	0.239895	1.93875	-1.20969	1.20356	-1.10229	0.033741	-0.83089	-0.36669	0.051479	-1.30146	1.34788	-0.85626	0.019524	-1.14757	0.068573	-0.0384
	3.0988	0.891943	0.320784	0.111773	1.78149	0.608956	0.420864	-0.1975	0.09476	-0.53568	0.077118	0.598062	0.314028	2.01014	-1.20865	1.14934	-1.048	0.034625	-0.84364	-0.34162	-0.00844	-1.25212	1.37079	-0.84179	-0.05843	-1.16291	0.080462	0.018464
	3.1232	0.908198	0.353048	0.023814	1.92091	0.633732	0.402701	-0.19294	0.03324	-0.432	0.092147	0.632003	0.398386	2.09666	-1.20235	1.08283	-0.99286	0.027659	-0.83655	-0.32312	-0.09428	-1.19331	1.39825	-0.83152	-0.13564	-1.1792	0.096548	0.104584
	3.1476	0.916499	0.419284	-0.04866	2.07326	0.654553	0.379745	-0.17298	-0.03164	-0.29829	0.100282	0.673741	0.49142	2.19055	-1.1908	1.00665	-0.94711	0.014326	-0.79807	-0.31172	-0.19602	-1.13436	1.43345	-0.82645	-0.21011	-1.19754	0.114949	0.225721
	3.172	0.916159	0.516584	-0.10189	2.22583	0.670799	0.35467	-0.1376	-0.09843	-0.12872	0.102097	0.724208	0.587611	2.28367	-1.17451	0.924797	-0.91976	-0.00339	-0.72215	-0.30621	-0.28924	-1.0837	1.47727	-0.82708	-0.28095	-1.21728	0.133375	0.381499
	3.1964	0.90727	0.641807	-0.13178	2.36372	0.682836	0.331375	-0.09028	-0.16571	0.079324	0.098409	0.792727	0.67991	2.37049	-1.15413	0.841703	-0.91714	-0.02402	-0.61064	-0.30449	-0.34579	-1.04573	1.52725	-0.83265	-0.34767	-1.23737	0.149865	0.565355
	3.2208	0.890776	0.795165	-0.13598	2.47434	0.691888	0.311753	-0.03723	-0.23191	0.320121	0.08985	0.891177	0.762859	2.44964	-1.13039	0.761326	-0.9423	-0.04683	-0.47122	-0.30484	-0.34588	-1.01938	1.57966	-0.84096	-0.41138	-1.2571	0.163594	0.769032
	3.2452	0.868416	0.980722	-0.11625	2.55042	0.699643	0.295056	0.015095	-0.29559	0.578853	0.076871	1.02673	0.831952	2.52309	-1.10421	0.686543	-0.99499	-0.07163	-0.3131	-0.3065	-0.28696	-0.9997	1.63015	-0.84952	-0.47461	-1.27576	0.174871	0.981904
	3.2696	0.842459	1.20464	-0.07836	2.58995	0.707729	0.279869	0.062549	-0.35585	0.83528	0.059741	1.19901	0.881018	2.59347	-1.07657	0.619296	-1.07235	-0.09858	-0.14698	-0.30927	-0.18492	-0.98118	1.67492	-0.85685	-0.53957	-1.29255	0.184353	1.19209
	3.294	0.815356	1.47469	-0.02935	2.59608	0.717301	0.265606	0.103558	-0.41248	1.06947	0.038347	1.39981	0.902996	2.66146	-1.0481	0.561867	-1.16929	-0.12794	0.015208	-0.31238	-0.06233	-0.96007	1.71403	-0.86323	-0.60813	-1.30731	0.192219	1.39228
	3.3184	0.789335	1.79863	0.024569	2.57775	0.728822	0.252456	0.138099	-0.46605	1.26665	0.012382	1.61232	0.894451	2.72541	-1.01918	0.517318	-1.2782	-0.15988	0.164141	-0.31399	0.064851	-0.93407	1.75068	-0.87065	-0.6817	-1.32128	0.197771	1.58275
	3.3428	0.765891	2.17939	0.077735	2.54799	0.741753	0.240214	0.167415	-0.51791	1.42139	-0.01793	1.81217	0.859284	2.7838	-0.99047	0.487336	-1.38907	-0.19428	0.296159	-0.31185	0.18748	-0.90096	1.787	-0.88165	-0.75919	-1.33664	0.199384	1.76745
	3.3672	0.745348	2.61058	0.125231	2.51944	0.75414	0.227178	0.194312	-0.56956	1.54031	-0.05133	1.97234	0.807	2.83786	-0.96306	0.470446	-1.49111	-0.23067	0.412915	-0.30469	0.299369	-0.85851	1.82313	-0.89755	-0.83636	-1.35568	0.194779	1.94632
	3.3916	0.726891	3.07694	0.164483	2.50086	0.762775	0.210697	0.222425	-0.62203	1.63895	-0.08581	2.06795	0.747653	2.89121	-0.93817	0.463935	-1.5756	-0.26833	0.518433	-0.293	0.398685	-0.80546	1.85795	-0.91766	-0.90796	-1.38031	0.181801	2.11328
	3.416	0.70933	3.56039	0.196612	2.49619	0.76473	0.188552	0.254669	-0.67575	1.73154	-0.11919	2.07808	0.689816	2.94619	-0.91664	0.466968	-1.63784	-0.30618	0.617992	-0.27849	0.486251	-0.74252	1.88877	-0.94012	-0.96917	-1.41173	0.159238	2.26085
	3.4404	0.692051	4.04577	0.226754	2.5047	0.759343	0.159651	0.292222	-0.73078	1.82177	-0.14942	1.98936	0.641681	3.00102	-0.89858	0.481169	-1.67624	-0.34269	0.72193	-0.26279	0.559123	-0.67265	1.91192	-0.9632	-1.01601	-1.45025	0.127084	2.38101
	3.4648	0.675114	4.51921	0.262629	2.52102	0.748778	0.124286	0.334148	-0.7871	1.9029	-0.17461	1.80436	0.610982	3.05156	-0.88324	0.509091	-1.69044	-0.37639	0.845323	-0.24657	0.609456	-0.59994	1.92484	-0.98604	-1.04645	-1.49501	0.086517	2.46547
	3.4892	0.65859	4.96247	0.311834	2.53525	0.736883	0.084516	0.377737	-0.84497	1.96634	-0.1932	1.54668	0.60345	3.09431	-0.8694	0.551934	-1.68108	-0.40634	0.998242	-0.22957	0.631309	-0.52794	1.92721	-1.00858	-1.06105	-1.54343	0.040038	2.51236
	3.5136	0.642271	5.35153	0.380309	2.5344	0.727474	0.043896	0.419704	-0.90454	2.01104	-0.20421	1.25475	0.621982	3.12748	-0.85638	0.607844	-1.65127	-0.43208	1.17693	-0.21124	0.627396	-0.45932	1.92123	-1.03053	-1.06259	-1.59171	-0.00879	2.52854
	3.538	0.626086	5.66006	0.472528	2.5066	0.722933	0.005647	0.45737	-0.96549	2.04333	-0.20749	0.969045	0.666347	3.15104	-0.84478	0.673078	-1.60758	-0.45317	1.36429	-0.19121	0.608036	-0.39639	1.91287	-1.05013	-1.05557	-1.63623	-0.05659	2.5226
	3.5624	0.610525	5.86624	0.591231	2.44566	0.723483	-0.02868	0.489103	-1.0271	2.06754	-0.20393	0.722659	0.732596	3.16518	-0.83607	0.744409	-1.55904	-0.46936	1.53777	-0.16935	0.582392	-0.34036	1.9116	-1.06435	-1.0456	-1.67513	-0.10139	2.50236
	3.5868	0.596499	5.96161	0.735489	2.3523	0.726987	-0.05815	0.513847	-1.08863	2.08119	-0.19537	0.536099	0.812988	3.16823	-0.83148	0.819057	-1.51434	-0.48097	1.67927	-0.14565	0.550141	-0.29042	1.92602	-1.07078	-1.03851	-1.70889	-0.14274	2.47963
	3.6112	0.584829	5.95543	0.898909	2.23231	0.729372	-0.08164	0.530273	-1.1492	2.07823	-0.18418	0.413813	0.896859	3.15758	-0.83113	0.893528	-1.47968	-0.4888	1.78214	-0.12046	0.502579	-0.24474	1.95751	-1.06898	-1.03854	-1.7394	-0.18103	2.46965
	3.6356	0.575911	5.86961	1.07003	2.09465	0.72545	-0.09884	0.536884	-1.20752	2.05217	-0.17288	0.347066	0.97208	3.13257	-0.83442	0.963915	-1.45876	-0.49362	1.85241	-0.09471	0.432384	-0.20227	1.99889	-1.06028	-1.04686	-1.76859	-0.21666	2.48181
	3.66	0.569697	5.72833	1.23448	1.94866	0.709797	-0.11132	0.533144	-1.26195	1.99814	-0.16392	0.321132	1.02759	3.0956	-0.84101	1.02648	-1.45291	-0.49607	1.90314	-0.06975	0.341501	-0.16245	2.04	-1.04622	-1.06166	-1.7979	-0.24939	2.51349
	3.6844	0.565846	5.54853	1.37806	1.8012	0.678202	-0.12271	0.519852	-1.31127	1.916	-0.15952	0.318911	1.05613	3.05013	-0.85094	1.07766	-1.46035	-0.49678	1.94653	-0.0474	0.239556	-0.12369	2.07367	-1.02759	-1.0795	-1.82853	-0.27853	2.5554
	3.7088	0.564002	5.33584	1.48995	1.65694	0.629438	-0.13805	0.497996	-1.35521	1.81308	-0.16149	0.323619	1.05516	2.99826	-0.86416	1.11446	-1.47638	-0.49643	1.98884	-0.03028	0.136747	-0.08339	2.09677	-1.00492	-1.09771	-1.8616	-0.3036	2.59992
	3.7332	0.564082	5.08697	1.5644	1.52065	0.566086	-0.16221	0.468039	-1.39431	1.70189	-0.17088	0.323127	1.02693	2.94217	-0.88005	1.13562	-1.49507	-0.49581	2.02873	-0.02165	0.040147	-0.03965	2.10846	-0.97961	-1.1153	-1.89786	-0.32487	2.64242
	3.7576	0.566162	4.79642	1.60231	1.39813	0.494003	-0.19806	0.431235	-1.4299	1.59242	-0.18757	0.311437	0.978633	2.887	-0.89736	1.14319	-1.51216	-0.49559	2.05927	-0.02463	-0.04437	0.007392	2.10864	-0.95441	-1.13084	-1.93739	-0.3439	2.67735
	3.782	0.570128	4.46315	1.61265	1.29452	0.420517	-0.24586	0.391268	-1.46401	1.48699	-0.21017	0.287143	0.919963	2.83956	-0.91436	1.14332	-1.52714	-0.49594	2.07239	-0.04096	-0.10973	0.055473	2.09796	-0.93285	-1.13983	-1.97923	-0.36288	2.69587
	3.8064	0.575883	4.0945	1.6091	1.2123	0.352145	-0.30368	0.353972	-1.49858	1.38372	-0.23626	0.252283	0.858689	2.80401	-0.92903	1.14413	-1.54248	-0.49618	2.06318	-0.07027	-0.14848	0.100822	2.07966	-0.91791	-1.13506	-2.02125	-0.38321	2.68999
	3.8308	0.584087	3.70732	1.60261	1.15127	0.293132	-0.36791	0.325483	-1.53484	1.28378	-0.2628	0.211883	0.799267	2.77998	-0.9393	1.15126	-1.56119	-0.495	2.03202	-0.1104	-0.15525	0.139033	2.06087	-0.9111	-1.11026	-2.06112	-0.40479	2.66012
	3.8552	0.596444	3.32554	1.59741	1.10934	0.244988	-0.43425	0.310633	-1.57368	1.19281	-0.2866	0.173305	0.745009	2.7636	-0.9434	1.1657	-1.58491	-0.49115	1.98268	-0.15845	-0.12898	0.167112	2.05056	-0.91296	-1.06399	-2.0977	-0.42646	2.61721
	3.8796	0.615001	2.97302	1.59368	1.08349	0.206899	-0.49913	0.312107	-1.61597	1.11565	-0.30485	0.146291	0.699259	2.75042	-0.94019	1.18535	-1.61333	-0.4842	1.91712	-0.21172	-0.07398	0.18572	2.05513	-0.92354	-1.00098	-2.13116	-0.44672	2.57534
	3.904	0.640939	2.66597	1.59141	1.07076	0.176866	-0.56032	0.329778	-1.66252	1.05289	-0.31561	0.142351	0.664188	2.73764	-0.92942	1.20658	-1.64454	-0.47502	1.83367	-0.2682	0.00026	0.199573	2.07507	-0.94177	-0.93023	-2.16156	-0.46427	2.54157
	3.9284	0.673795	2.41076	1.59087	1.06799	0.15253	-0.61666	0.360862	-1.7138	1.00282	-0.31816	0.170654	0.640398	2.7241	-0.91185	1.22562	-1.6759	-0.46578	1.73217	-0.3264	0.081783	0.215186	2.10563	-0.96479	-0.86016	-2.18809	-0.47865	2.51329
	3.9528	0.711602	2.20682	1.59162	1.07188	0.130875	-0.66791	0.401187	-1.76969	0.962438	-0.31302	0.233318	0.628135	2.70992	-0.88927	1.24023	-1.70448	-0.45937	1.62003	-0.38512	0.16102	0.236638	2.14099	-0.98839	-0.79603	-2.20945	-0.49055	2.48297
	3.9772	0.751591	2.05098	1.5938	1.08001	0.107707	-0.71498	0.446336	-1.82943	0.926959	-0.30143	0.324649	0.626993	2.6973	-0.86432	1.24968	-1.72677	-0.45807	1.50945	-0.44326	0.231687	0.261863	2.17684	-1.00788	-0.74172	-2.22375	-0.50154	2.44192
	4.0016	0.7909	1.94096	1.59939	1.09072	0.078527	-0.75972	0.492624	-1.89177	0.891832	-0.28476	0.433768	0.63382	2.68966	-0.83977	1.25407	-1.73896	-0.46258	1.40827	-0.49963	0.286393	0.282902	2.20982	-1.01904	-0.69985	-2.22883	-0.51326	2.3829
	4.026	0.827119	1.87841	1.60974	1.10259	0.040571	-0.80375	0.538182	-1.95546	0.854148	-0.26432	0.548628	0.642111	2.68903	-0.81734	1.25391	-1.73781	-0.47219	1.31818	-0.55264	0.31764	0.290561	2.23678	-1.01905	-0.66913	-2.22347	-0.5272	2.30373
	4.0504	0.858568	1.86964	1.62154	1.11392	-0.00656	-0.84719	0.583052	-2.01998	0.811598	-0.24157	0.66071	0.64437	2.69348	-0.79667	1.24869	-1.72092	-0.48532	1.24155	-0.60001	0.32398	0.279136	2.25565	-1.00745	-0.64444	-2.20787	-0.5448	2.20862
	4.0748	0.884089	1.92147	1.62696	1.12176	-0.06254	-0.88844	0.62793	-2.086	0.763299	-0.21821	0.76778	0.635289	2.69759	-0.77571	1.23468	-1.68646	-0.49996	1.18276	-0.63869	0.309572	0.247879	2.26674	-0.98661	-0.62014	-2.18394	-0.56748	2.10488
	4.0992	0.902563	2.03528	1.61821	1.1225	-0.1274	-0.92477	0.672357	-2.15518	0.711529	-0.19577	0.870609	0.613501	2.69678	-0.75245	1.20663	-1.63338	-0.51398	1.14088	-0.66532	0.279042	0.200578	2.27196	-0.96096	-0.59305	-2.15523	-0.5965	1.99623
	4.1236	0.912792	2.20513	1.59071	1.11363	-0.20055	-0.95297	0.714211	-2.22937	0.660453	-0.17506	0.966257	0.58217	2.69045	-0.72617	1.16347	-1.56187	-0.52577	1.10517	-0.67731	0.237314	0.144275	2.27173	-0.93482	-0.56332	-2.12522	-0.63242	1.8795
	4.148	0.91401	2.4199	1.54272	1.09473	-0.27925	-0.96993	0.751223	-2.30954	0.614151	-0.15606	1.04655	0.54761	2.68027	-0.69723	1.11103	-1.47348	-0.53483	1.05972	-0.67324	0.192599	0.086558	2.26426	-0.91072	-0.53348	-2.09612	-0.67419	1.75098
	4.1724	0.906499	2.66512	1.47411	1.06698	-0.35887	-0.97343	0.782297	-2.39483	0.577293	-0.13809	1.10349	0.515588	2.6665	-0.66659	1.0593	-1.37055	-0.54229	0.992909	-0.65255	0.154941	0.032509	2.248	-0.89011	-0.50697	-2.06937	-0.71885	1.61354
	4.1968	0.891778	2.92294	1.38546	1.03238	-0.43503	-0.96358	0.807218	-2.48189	0.553832	-0.12008	1.13529	0.488475	2.64663	-0.63558	1.0176	-1.2556	-0.55093	0.90449	-0.61539	0.13201	-0.01645	2.22326	-0.8748	-0.48753	-2.04633	-0.76253	1.47336
	4.2212	0.872381	3.17357	1.27774	0.993896	-0.50586	-0.94282	0.825959	-2.5652	0.541059	-0.1011	1.14726	0.464975	2.6169	-0.60534	0.990436	-1.13166	-0.56417	0.804499	-0.56343	0.128118	-0.06105	2.19205	-0.8668	-0.47949	-2.02781	-0.80187	1.33614
	4.2456	0.851265	3.39991	1.15429	0.955428	-0.57237	-0.91425	0.838635	-2.63801	0.527588	-0.08136	1.14584	0.441633	2.57535	-0.57627	0.975622	-1.00271	-0.58442	0.703534	-0.50082	0.144532	-0.10182	2.15681	-0.86707	-0.48763	-2.01275	-0.8346	1.21006
	4.27	0.831019	3.58977	1.02426	0.920701	-0.63711	-0.88021	0.845711	-2.69402	0.500597	-0.06262	1.1325	0.415254	2.5233	-0.54808	0.96565	-0.87409	-0.61187	0.605225	-0.43395	0.179189	-0.13812	2.11886	-0.87483	-0.51535	-1.99804	-0.85966	1.10242
	4.2944	0.81335	3.73195	0.903117	0.891719	-0.70255	-0.84221	0.84759	-2.72923	0.454905	-0.0474	1.10535	0.384407	2.46513	-0.52038	0.95151	-0.75316	-0.64437	0.508394	-0.36985	0.229019	-0.16828	2.07789	-0.88798	-0.56183	-1.98038	-0.87725	1.01236
	4.3188	0.79891	3.81247	0.806372	0.867497	-0.77004	-0.80202	0.844144	-2.74299	0.394177	-0.03768	1.06554	0.349958	2.4074	-0.4933	0.926672	-0.64822	-0.67872	0.412748	-0.31442	0.294403	-0.19013	2.03339	-0.90401	-0.62096	-1.95893	-0.88864	0.93351
	4.3432	0.787212	3.81807	0.740695	0.84368	-0.83931	-0.76259	0.835135	-2.73765	0.323776	-0.03392	1.01919	0.31505	2.35708	-0.46795	0.887827	-0.56526	-0.71224	0.321873	-0.27173	0.378835	-0.20062	1.98592	-0.92047	-0.6839	-1.93598	-0.89553	0.858919
	4.3676	0.776926	3.74259	0.701157	0.81467	-0.90869	-0.72729	0.821414	-2.71712	0.244957	-0.03496	0.973457	0.282386	2.32027	-0.44634	0.833649	-0.50563	-0.74386	0.242935	-0.244	0.4816	-0.19474	1.93583	-0.93521	-0.74241	-1.91576	-0.89976	0.783539
	4.392	0.766653	3.58845	0.675834	0.777358	-0.97571	-0.69876	0.805796	-2.68539	0.156911	-0.03859	0.93174	0.250806	2.30124	-0.43049	0.765199	-0.46699	-0.77409	0.183189	-0.23161	0.593324	-0.16631	1.88064	-0.94691	-0.78995	-1.9027	-0.90317	0.708742
	4.4164	0.755381	3.36428	0.652203	0.733192	-1.03765	-0.67888	0.79177	-2.64586	0.060936	-0.04237	0.892291	0.216335	2.3004	-0.4214	0.686915	-0.44581	-0.80438	0.144279	-0.2334	0.700639	-0.11174	1.81665	-0.9557	-0.82248	-1.90045	-0.90724	0.641984
	4.4408	0.742293	3.08366	0.62161	0.687186	-1.0926	-0.66916	0.780861	-2.60142	-0.04122	-0.04451	0.850959	0.17614	2.31347	-0.41856	0.606163	-0.43929	-0.83638	0.118661	-0.24702	0.793637	-0.03306	1.74339	-0.96363	-0.84071	-1.91071	-0.91282	0.588999
	4.4652	0.72655	2.76505	0.580257	0.645049	-1.14087	-0.67046	0.772201	-2.55496	-0.15178	-0.04422	0.803197	0.130724	2.33418	-0.42036	0.530714	-0.44596	-0.87129	0.09373	-0.26936	0.870197	0.062327	1.66465	-0.9736	-0.85014	-1.93148	-0.92017	0.548601
	4.4896	0.70725	2.43095	0.528319	0.610808	-1.18538	-0.68251	0.764069	-2.50948	-0.27432	-0.04166	0.744287	0.084023	2.35755	-0.42497	0.465102	-0.46553	-0.90914	0.060464	-0.29713	0.935716	0.163877	1.5855	-0.98743	-0.8572	-1.95672	-0.92926	0.515616
	4.514	0.683623	2.10584	0.469791	0.585814	-1.23001	-0.70396	0.754559	-2.46785	-0.40586	-0.03769	0.672754	0.042274	2.38087	-0.43103	0.409302	-0.49741	-0.94842	0.015974	-0.32728	0.998689	0.26096	1.50989	-1.00497	-0.86498	-1.97915	-0.94008	0.487495
	4.5384	0.655783	1.81296	0.411826	0.569013	-1.27694	-0.73265	0.741912	-2.43269	-0.53464	-0.03345	0.594465	0.011439	2.4033	-0.438	0.360402	-0.53882	-0.98668	-0.03971	-0.35724	1.066	0.346299	1.44057	-1.02484	-0.87296	-1.99354	-0.95257	0.467693
	4.5628	0.625417	1.57079	0.362403	0.558914	-1.32544	-0.76547	0.725891	-2.40616	-0.64672	-0.02971	0.520586	-0.00585	2.42585	-0.44605	0.31521	-0.58449	-1.0216	-0.10419	-0.38509	1.14004	0.417639	1.37962	-1.04545	-0.87983	-1.99817	-0.96579	0.46192
	4.5872	0.595436	1.39021	0.327146	0.555977	-1.37289	-0.79896	0.708274	-2.38963	-0.73429	-0.02623	0.461331	-0.01165	2.45055	-0.45553	0.272668	-0.62774	-1.05126	-0.172	-0.4094	1.21739	0.475737	1.32811	-1.06541	-0.88454	-1.99508	-0.97711	0.469455
	4.6116	0.568746	1.27205	0.307253	0.562423	-1.41648	-0.83035	0.691004	-2.38342	-0.79786	-0.02186	0.420832	-0.01154	2.47869	-0.46658	0.234102	-0.66277	-1.07403	-0.23789	-0.4288	1.29019	0.521866	1.28556	-1.08324	-0.88501	-1.98857	-0.98276	0.479351
	4.636	0.547117	1.20716	0.300277	0.579476	-1.45373	-0.8579	0.674598	-2.38698	-0.84267	-0.01533	0.395588	-0.01273	2.51078	-0.47939	0.201518	-0.68734	-1.08847	-0.30107	-0.44194	1.34951	0.557228	1.24998	-1.09726	-0.87841	-1.98249	-0.97943	0.475951
	4.6604	0.530776	1.18082	0.301689	0.605176	-1.4823	-0.88037	0.659116	-2.39891	-0.87425	-0.00611	0.377623	-0.0225	2.54711	-0.49459	0.176734	-0.70282	-1.09348	-0.36533	-0.44832	1.38925	0.582993	1.21876	-1.10553	-0.86409	-1.97881	-0.96557	0.445622
	4.6848	0.518725	1.17847	0.305113	0.63426	-1.50044	-0.89704	0.645097	-2.41699	-0.89619	0.005252	0.359803	-0.04611	2.58645	-0.51321	0.160222	-0.71109	-1.08853	-0.43556	-0.44892	1.4082	0.600628	1.18994	-1.10603	-0.84545	-1.97735	-0.94114	0.380774
	4.7092	0.509552	1.1893	0.303729	0.659911	-1.50802	-0.90891	0.632597	-2.43862	-0.91156	0.017205	0.339343	-0.08407	2.6257	-0.53656	0.149228	-0.71294	-1.07406	-0.51576	-0.44574	1.40917	0.612238	1.16151	-1.09674	-0.82775	-1.97594	-0.9069	0.282161
	4.7336	0.502234	1.2065	0.293748	0.676935	-1.50664	-0.91889	0.620769	-2.46153	-0.92483	0.027981	0.319334	-0.13124	2.66159	-0.56596	0.138474	-0.70895	-1.05162	-0.60898	-0.4412	1.39669	0.619561	1.13001	-1.07612	-0.81467	-1.97118	-0.86384	0.156691
	4.758	0.496464	1.22585	0.276279	0.684377	-1.4986	-0.93025	0.608279	-2.48417	-0.93758	0.036475	0.308458	-0.17933	2.69186	-0.6024	0.123084	-0.69969	-1.02377	-0.7155	-0.43759	1.37551	0.62214	1.09333	-1.04387	-0.8075	-1.95995	-0.81293	0.013659
	4.7824	0.492386	1.24536	0.255262	0.685752	-1.48626	-0.94474	0.592947	-2.50562	-0.94284	0.042564	0.317404	-0.22119	2.71495	-0.64612	0.100831	-0.68475	-0.99363	-0.82941	-0.43662	1.34988	0.616278	1.05402	-1.00171	-0.80552	-1.94106	-0.75481	-0.13533
	4.8068	0.490096	1.26516	0.23312	0.686704	-1.47171	-0.96145	0.571974	-2.52544	-0.93039	0.046972	0.353542	-0.25333	2.72974	-0.69642	0.072534	-0.66323	-0.9644	-0.93788	-0.43914	1.32301	0.595072	1.01754	-0.9536	-0.80643	-1.91605	-0.69029	-0.27714
	4.8312	0.489325	1.28618	0.208027	0.691531	-1.45584	-0.97719	0.543953	-2.54306	-0.89925	0.050965	0.417468	-0.2763	2.73602	-0.75128	0.040345	-0.63492	-0.93877	-1.02621	-0.44501	1.29699	0.550576	0.987924	-0.90522	-0.80731	-1.88839	-0.62159	-0.40127
	4.8556	0.489546	1.30832	0.17547	0.701427	-1.43771	-0.98837	0.510271	-2.55739	-0.85923	0.055822	0.503067	-0.29336	2.73506	-0.8074	0.006024	-0.59958	-0.91855	-1.08482	-0.45273	1.27326	0.478119	0.964474	-0.86269	-0.80433	-1.86212	-0.55322	-0.50225
	4.88	0.490422	1.32921	0.131811	0.715817	-1.4157	-0.99236	0.473783	-2.56715	-0.8203	0.062372	0.599947	-0.30831	2.7291	-0.86139	-0.02829	-0.55571	-0.90462	-1.11303	-0.4594	1.25178	0.378827	0.941825	-0.83144	-0.7931	-1.84136	-0.49135	-0.57988
	4.9044	0.492035	1.34424	0.075815	0.734629	-1.3893	-0.98677	0.43655	-2.57175	-0.78676	0.07103	0.696199	-0.32494	2.72011	-0.91083	-0.05948	-0.50053	-0.89764	-1.11985	-0.46157	1.23062	0.258626	0.914696	-0.81544	-0.77122	-1.83006	-0.4426	-0.63973
	4.9288	0.494575	1.34809	0.007972	0.759115	-1.36005	-0.9686	0.398941	-2.57163	-0.75977	0.082093	0.780916	-0.34766	2.70876	-0.95397	-0.08632	-0.43156	-0.89852	-1.12146	-0.45644	1.20705	0.12632	0.88253	-0.81603	-0.73927	-1.83083	-0.41291	-0.68822
	4.9532	0.497917	1.33668	-0.07004	0.791148	-1.33117	-0.93533	0.360208	-2.56779	-0.73921	0.095861	0.845924	-0.38051	2.69438	-0.98887	-0.11187	-0.34831	-0.90814	-1.13493	-0.44267	1.17669	-0.00801	0.849508	-0.83074	-0.699	-1.84399	-0.40645	-0.72446
	4.9776	0.501468	1.30799	-0.15435	0.831557	-1.30678	-0.88652	0.319675	-2.56133	-0.7243	0.112344	0.88674	-0.42442	2.67563	-1.01406	-0.14151	-0.25297	-0.92658	-1.17065	-0.42061	1.13377	-0.13467	0.821656	-0.85419	-0.6518	-1.86741	-0.42527	-0.74114
	5.002	0.504404	1.26024	-0.238	0.878532	-1.29051	-0.82372	0.277434	-2.55304	-0.71394	0.130935	0.904224	-0.47535	2.65166	-1.0299	-0.17953	-0.14978	-0.95267	-1.22745	-0.39249	1.07512	-0.24587	0.803577	-0.88101	-0.59834	-1.8971	-0.46996	-0.73229

## Sheet: Figure3-Supp1C and D
	F3-S1-PANEL C														AUC FOR PERI REWARD CHANGE (PANEL D)
	Trial number	1-30	1-30	1-30	1-30	31-60	31-60	31-60	31-60	61-90	61-90	61-90	61-90
	Peri-action time - sec	S251	S252	S256	S320	S251	S252	S256	S320	S251	S252	S256	S320			S251	S252	S256	S320
	-2.0496	-0.16215	0.077141	-0.09739	-0.19608	-0.05564	0.196605	0.077349	0.153553	0.438557	0.385505	0.328901	0.015429		TRIAL 1-30	252.557	221.456	271.559	235.326
	-2.0252	-0.14986	0.065609	-0.04311	-0.21225	-0.08368	0.178795	0.057056	0.16559	0.441348	0.429661	0.313113	-0.03851		TRIAL 31-60	249.083	437.349	273.661	210.328
	-2.0008	-0.13595	0.062538	0.017775	-0.2228	-0.09745	0.158266	0.051209	0.176876	0.419883	0.465079	0.291606	-0.09155		TRIAL 61-90	215.387	350.191	189.877	94.4677
	-1.9764	-0.12107	0.069033	0.081235	-0.22025	-0.09277	0.138855	0.060041	0.182197	0.376539	0.487984	0.267338	-0.13518
	-1.952	-0.1047	0.085371	0.144782	-0.20025	-0.06805	0.123341	0.078475	0.173059	0.318603	0.498835	0.246056	-0.1642
	-1.9276	-0.08572	0.110654	0.206368	-0.16272	-0.02352	0.111456	0.099829	0.144983	0.253425	0.501375	0.232456	-0.17755
	-1.9032	-0.06367	0.142436	0.263111	-0.1102	0.037908	0.100499	0.119503	0.102777	0.184537	0.500054	0.227582	-0.17789
	-1.8788	-0.03909	0.17698	0.311678	-0.0476	0.108048	0.087149	0.136644	0.055349	0.112346	0.498457	0.228762	-0.17042
	-1.8544	-0.01389	0.210775	0.348674	0.017777	0.173627	0.068718	0.153193	0.007508	0.038335	0.500011	0.230436	-0.16153
	-1.83	0.007957	0.242284	0.371488	0.078831	0.221471	0.043763	0.171797	-0.03899	-0.03385	0.508598	0.225846	-0.15591
	-1.8056	0.021887	0.271937	0.380352	0.130591	0.24491	0.012213	0.194698	-0.08097	-0.1009	0.527256	0.209768	-0.15437
	-1.7812	0.025967	0.300962	0.378673	0.169655	0.246357	-0.02535	0.223588	-0.11393	-0.15976	0.556967	0.180168	-0.15641
	-1.7568	0.022591	0.330539	0.370016	0.194212	0.235535	-0.06847	0.25821	-0.1344	-0.20541	0.596366	0.138418	-0.1635
	-1.7324	0.017673	0.361351	0.355728	0.204444	0.226182	-0.11638	0.294303	-0.14226	-0.23184	0.641883	0.088834	-0.1757
	-1.708	0.017073	0.393579	0.336089	0.20251	0.231569	-0.16692	0.324504	-0.14007	-0.23636	0.689009	0.037119	-0.18699
	-1.6836	0.021893	0.427167	0.312359	0.192742	0.258926	-0.21669	0.341736	-0.13001	-0.22227	0.733937	-0.01132	-0.18836
	-1.6592	0.027603	0.46115	0.28648	0.181493	0.305936	-0.26208	0.342516	-0.11286	-0.19704	0.77369	-0.05224	-0.17502
	-1.6348	0.028118	0.492391	0.259151	0.175316	0.361771	-0.29944	0.329364	-0.09009	-0.16802	0.805289	-0.0836	-0.1491
	-1.6104	0.019478	0.515973	0.229655	0.177003	0.412815	-0.32554	0.309743	-0.06457	-0.1395	0.826138	-0.10583	-0.11641
	-1.586	0.000666	0.527909	0.197712	0.183634	0.450093	-0.33908	0.291049	-0.03827	-0.11213	0.836057	-0.12058	-0.08146
	-1.5616	-0.02556	0.528031	0.163962	0.190425	0.471948	-0.34128	0.277004	-0.01207	-0.08435	0.838592	-0.12975	-0.04621
	-1.5372	-0.05249	0.520142	0.1291	0.195607	0.480857	-0.33468	0.268555	0.01163	-0.0549	0.840178	-0.1348	-0.0123
	-1.5128	-0.0728	0.508933	0.094443	0.201234	0.480303	-0.32197	0.265744	0.028358	-0.02405	0.847601	-0.13557	0.016979
	-1.4884	-0.08228	0.49686	0.062255	0.211513	0.474223	-0.3054	0.268243	0.033657	0.006696	0.864332	-0.13102	0.03643
	-1.464	-0.07987	0.48376	0.034034	0.230271	0.467131	-0.28634	0.275717	0.026155	0.034112	0.888812	-0.12188	0.042511
	-1.4396	-0.0653	0.468496	0.009973	0.258704	0.463967	-0.2663	0.287016	0.0091	0.052645	0.917075	-0.11267	0.037759
	-1.4152	-0.03778	0.450499	-0.00947	0.29386	0.468975	-0.24783	0.298042	-0.01129	0.055816	0.946906	-0.11062	0.02954
	-1.3908	0.003241	0.429973	-0.02265	0.327809	0.484386	-0.23314	0.302886	-0.02845	0.039509	0.979538	-0.12166	0.024526
	-1.3664	0.055719	0.407254	-0.02708	0.35083	0.509947	-0.22235	0.299458	-0.03817	0.005007	1.01713	-0.14709	0.024478
	-1.342	0.113199	0.382687	-0.02055	0.358188	0.542169	-0.21284	0.292626	-0.04101	-0.04223	1.05825	-0.18408	0.02586
	-1.3176	0.166234	0.35729	-0.00241	0.353594	0.574121	-0.19953	0.290946	-0.0412	-0.09761	1.09739	-0.22777	0.023691
	-1.2932	0.206449	0.333298	0.025723	0.345393	0.597286	-0.17626	0.300836	-0.04272	-0.15891	1.12965	-0.2719	0.016372
	-1.2688	0.229303	0.313371	0.059363	0.339388	0.604692	-0.1385	0.322286	-0.0468	-0.22304	1.15478	-0.30863	0.006027
	-1.2444	0.23518	0.29851	0.091279	0.335776	0.594464	-0.08508	0.349093	-0.05358	-0.2838	1.17581	-0.33047	-0.00456
	-1.22	0.229808	0.286887	0.114	0.332538	0.571895	-0.01772	0.373119	-0.06473	-0.33352	1.1951	-0.33421	-0.01297
	-1.1956	0.222635	0.274892	0.123458	0.329636	0.547375	0.060184	0.387593	-0.08235	-0.36667	1.21249	-0.32238	-0.01668
	-1.1712	0.222317	0.258893	0.121133	0.328557	0.53069	0.144276	0.388316	-0.10641	-0.38196	1.22639	-0.30047	-0.01432
	-1.1468	0.23162	0.236079	0.113106	0.329697	0.526628	0.229373	0.37453	-0.134	-0.38138	1.2357	-0.27348	-0.00731
	-1.1224	0.246439	0.204869	0.106434	0.331881	0.535354	0.309704	0.349397	-0.15944	-0.36754	1.24137	-0.24302	0.001104
	-1.098	0.259918	0.165898	0.106043	0.333801	0.554666	0.380448	0.319441	-0.17747	-0.34185	1.24645	-0.20564	0.008928
	-1.0736	0.266737	0.122828	0.113423	0.335212	0.58154	0.43964	0.291422	-0.18707	-0.30556	1.25449	-0.1549	0.016386
	-1.0492	0.264153	0.081201	0.125526	0.33583	0.614123	0.488519	0.268321	-0.19004	-0.26188	1.26783	-0.0872	0.024872
	-1.0248	0.251469	0.045616	0.135654	0.333952	0.65309	0.530162	0.249279	-0.18771	-0.21476	1.28705	-0.00628	0.035633
	-1.0004	0.229543	0.018007	0.138156	0.328001	0.700983	0.567102	0.232903	-0.1799	-0.16572	1.31053	0.078568	0.048756
	-0.976	0.20063	-0.00174	0.13198	0.317791	0.760446	0.599658	0.219294	-0.16509	-0.1135	1.33425	0.158569	0.063469
	-0.9516	0.168431	-0.01434	0.118486	0.303841	0.832366	0.626423	0.209485	-0.14122	-0.05594	1.35258	0.228547	0.078011
	-0.9272	0.136687	-0.02046	0.098067	0.287311	0.91535	0.646181	0.204817	-0.10694	0.008272	1.35937	0.285463	0.088422
	-0.9028	0.107219	-0.02072	0.071103	0.270523	1.00608	0.659901	0.207081	-0.0622	0.078602	1.34963	0.327217	0.08935
	-0.8784	0.080609	-0.0161	0.040592	0.257226	1.09933	0.6707	0.216816	-0.00796	0.152919	1.32255	0.353479	0.076671
	-0.854	0.0581	-0.00786	0.011746	0.251139	1.18901	0.68185	0.23126	0.052987	0.229306	1.28304	0.366763	0.05001
	-0.8296	0.041743	0.0035	-0.01096	0.253059	1.26971	0.695346	0.246217	0.11397	0.307637	1.23944	0.371946	0.014197
	-0.8052	0.032888	0.019435	-0.02559	0.260595	1.33697	0.711409	0.259606	0.16566	0.388667	1.19933	0.37452	-0.02263
	-0.7808	0.031205	0.042574	-0.03165	0.270192	1.38708	0.728797	0.271198	0.201208	0.472177	1.16555	0.379674	-0.05275
	-0.7564	0.035332	0.073701	-0.02869	0.279058	1.41785	0.7461	0.278852	0.218545	0.556112	1.13618	0.392542	-0.07074
	-0.732	0.043547	0.109513	-0.01635	0.287359	1.42968	0.762603	0.277235	0.218117	0.636885	1.10992	0.417446	-0.07525
	-0.7076	0.054416	0.143209	0.005631	0.298996	1.42547	0.777878	0.262241	0.20157	0.709662	1.08947	0.455635	-0.0709
	-0.6832	0.067593	0.167262	0.036901	0.319358	1.40966	0.79156	0.235641	0.172713	0.768139	1.07833	0.504358	-0.06623
	-0.6588	0.082611	0.176718	0.075358	0.351154	1.3877	0.803894	0.20421	0.136596	0.805895	1.07561	0.558566	-0.06776
	-0.6344	0.09655	0.170725	0.119168	0.391756	1.36549	0.815801	0.176538	0.096749	0.819136	1.07555	0.613068	-0.07644
	-0.61	0.104486	0.151083	0.169754	0.435889	1.34671	0.828496	0.16086	0.054551	0.807871	1.07259	0.664051	-0.08971
	-0.5856	0.102697	0.120064	0.22999	0.479304	1.33055	0.843531	0.162353	0.011223	0.774933	1.06639	0.710194	-0.10404
	-0.5612	0.090759	0.079973	0.301071	0.517912	1.31314	0.862718	0.180708	-0.03044	0.724087	1.06042	0.752406	-0.11632
	-0.5368	0.07159	0.033772	0.382264	0.547369	1.28996	0.887121	0.210138	-0.06613	0.658442	1.05624	0.791798	-0.1266
	-0.5124	0.050434	-0.01493	0.470236	0.566357	1.25734	0.915519	0.242028	-0.09261	0.581333	1.05158	0.827709	-0.13876
	-0.488	0.032118	-0.06305	0.557944	0.577268	1.21399	0.944112	0.269982	-0.11115	0.49845	1.04433	0.857616	-0.15769
	-0.4636	0.017886	-0.10914	0.637383	0.581955	1.16134	0.968654	0.293572	-0.12613	0.416009	1.03616	0.879185	-0.18685
	-0.4392	0.004563	-0.15241	0.703617	0.578671	1.10287	0.987311	0.317251	-0.13983	0.337237	1.03102	0.892072	-0.22614
	-0.4148	-0.01405	-0.1911	0.755426	0.563356	1.0447	1.00117	0.347071	-0.15149	0.263557	1.03163	0.896936	-0.26996
	-0.3904	-0.04411	-0.22223	0.794171	0.533589	0.994311	1.01258	0.386636	-0.16077	0.197923	1.03675	0.894233	-0.30851
	-0.366	-0.08768	-0.24328	0.822776	0.492167	0.956419	1.02384	0.433635	-0.17101	0.144798	1.0405	0.885513	-0.33069
	-0.3416	-0.14094	-0.25472	0.844697	0.446215	0.930432	1.03667	0.481987	-0.18946	0.108375	1.0364	0.874284	-0.3271
	-0.3172	-0.19615	-0.26039	0.863199	0.402423	0.912163	1.05161	0.527427	-0.22285	0.091829	1.0226	0.864043	-0.29462
	-0.2928	-0.24479	-0.26493	0.879862	0.363748	0.896958	1.06828	0.56939	-0.27275	0.096215	1.00178	0.855759	-0.23956
	-0.2684	-0.2796	-0.27104	0.8927	0.331348	0.88185	1.08576	0.608673	-0.33499	0.1196	0.977893	0.848255	-0.17676
	-0.244	-0.2954	-0.27897	0.896874	0.308599	0.865991	1.1027	0.64526	-0.40125	0.158102	0.955008	0.840629	-0.12323
	-0.2196	-0.2897	-0.28751	0.887459	0.300141	0.848644	1.11833	0.678912	-0.46404	0.207129	0.93691	0.833308	-0.08882
	-0.1952	-0.26299	-0.2944	0.861942	0.306435	0.827496	1.13354	0.710485	-0.52303	0.261729	0.92599	0.828057	-0.0735
	-0.1708	-0.21895	-0.29624	0.821324	0.321039	0.800396	1.15001	0.740735	-0.5833	0.315787	0.92222	0.827937	-0.07261
	-0.1464	-0.1632	-0.28942	0.768586	0.333622	0.76775	1.16879	0.767939	-0.64651	0.361163	0.922025	0.835665	-0.08093
	-0.122	-0.10093	-0.27173	0.705888	0.335085	0.732323	1.19017	0.788334	-0.70698	0.390427	0.91915	0.851549	-0.09362
	-0.0976	-0.03647	-0.24296	0.633924	0.320946	0.69664	1.21396	0.798601	-0.75653	0.401111	0.908734	0.873852	-0.10836
	-0.0732	0.025699	-0.20455	0.553818	0.292268	0.661081	1.239	0.797398	-0.79102	0.39574	0.89072	0.900544	-0.12696
	-0.0488	0.081499	-0.16027	0.469443	0.254034	0.625794	1.26322	0.785996	-0.81181	0.37881	0.869599	0.930179	-0.15337
	-0.0244	0.128105	-0.11679	0.388208	0.212159	0.593241	1.28466	0.767708	-0.82221	0.355094	0.852179	0.961749	-0.18875
	0	0.163903	-0.0814	0.318149	0.171706	0.566348	1.30245	0.745723	-0.82558	0.328604	0.845529	0.99364	-0.2283
	0.0244	0.188512	-0.05774	0.262598	0.137238	0.545222	1.31728	0.721597	-0.82695	0.301088	0.854618	1.02256	-0.26396
	0.0488	0.201715	-0.04394	0.218879	0.113206	0.528142	1.33095	0.695509	-0.83139	0.273098	0.880099	1.04375	-0.28884
	0.0732	0.202505	-0.03507	0.18272	0.102492	0.514825	1.345	0.66688	-0.83975	0.246196	0.918196	1.05258	-0.29978
	0.0976	0.190094	-0.02768	0.152231	0.104337	0.507221	1.35957	0.635017	-0.84862	0.222506	0.962656	1.04652	-0.29833
	0.122	0.164937	-0.02232	0.127888	0.11425	0.508154	1.37335	0.601315	-0.85447	0.203497	1.00788	1.02616	-0.2879
	0.1464	0.12822	-0.02205	0.110815	0.126347	0.519168	1.38478	0.571213	-0.85598	0.189087	1.05139	0.994931	-0.26933
	0.1708	0.080865	-0.02888	0.101685	0.135426	0.538356	1.39323	0.550459	-0.85344	0.177472	1.09352	0.95797	-0.24111
	0.1952	0.023146	-0.04224	0.099994	0.138503	0.56086	1.39899	0.538682	-0.84698	0.166344	1.13575	0.920589	-0.20253
	0.2196	-0.04497	-0.06092	0.103766	0.136824	0.581814	1.4025	0.530133	-0.83482	0.152821	1.17889	0.887415	-0.15591
	0.244	-0.12292	-0.08524	0.111142	0.134238	0.597781	1.40345	0.52036	-0.81316	0.13294	1.22096	0.861789	-0.1072
	0.2684	-0.20874	-0.1162	0.12198	0.132192	0.605871	1.40139	0.508937	-0.77793	0.103325	1.25731	0.844311	-0.06336
	0.2928	-0.29897	-0.15321	0.136552	0.129395	0.602955	1.39701	0.496792	-0.72768	0.062686	1.28388	0.831483	-0.02855
	0.3172	-0.38886	-0.19251	0.153433	0.126141	0.585238	1.39244	0.484183	-0.66487	0.01224	1.30041	0.816673	-0.00461
	0.3416	-0.47295	-0.22849	0.170048	0.125104	0.547792	1.3908	0.471088	-0.5941	-0.04416	1.31054	0.793307	0.006631
	0.366	-0.54607	-0.25671	0.185111	0.127317	0.486056	1.39507	0.457173	-0.52141	-0.1018	1.31866	0.757925	0.003179
	0.3904	-0.60428	-0.27572	0.199499	0.130361	0.399329	1.40613	0.441649	-0.45439	-0.15696	1.32753	0.71152	-0.01611
	0.4148	-0.64673	-0.28635	0.214779	0.131119	0.293439	1.42153	0.424521	-0.39909	-0.20576	1.33854	0.659221	-0.05081
	0.4392	-0.67617	-0.28995	0.231653	0.1274	0.180539	1.43724	0.406786	-0.35637	-0.24369	1.35219	0.607654	-0.09779
	0.4636	-0.69601	-0.28736	0.249569	0.116622	0.075262	1.45022	0.388907	-0.32184	-0.26768	1.3675	0.560892	-0.15094
	0.488	-0.7077	-0.27992	0.267175	0.095752	-0.01143	1.45868	0.370581	-0.28888	-0.27744	1.38155	0.519891	-0.20161
	0.5124	-0.71103	-0.27081	0.282778	0.063345	-0.07653	1.46077	0.351356	-0.25298	-0.27517	1.39021	0.486404	-0.23927
	0.5368	-0.70522	-0.26414	0.294667	0.021251	-0.12345	1.45466	0.330568	-0.21561	-0.26622	1.39102	0.466074	-0.25623
	0.5612	-0.69029	-0.26208	0.301796	-0.02491	-0.15599	1.4404	0.307652	-0.18477	-0.25908	1.38558	0.467113	-0.25254
	0.5856	-0.66899	-0.26393	0.304256	-0.0674	-0.17505	1.42135	0.282401	-0.17085	-0.26287	1.37781	0.496381	-0.233
	0.61	-0.64762	-0.26823	0.304058	-0.10008	-0.18109	1.40302	0.255	-0.18064	-0.2843	1.37176	0.555914	-0.20099
	0.6344	-0.63318	-0.2747	0.305977	-0.12092	-0.17782	1.39003	0.226577	-0.21404	-0.32628	1.37182	0.640887	-0.15744
	0.6588	-0.62898	-0.28418	0.315178	-0.13091	-0.17251	1.38432	0.198055	-0.26556	-0.38835	1.38136	0.740116	-0.10445
	0.6832	-0.63312	-0.29739	0.333533	-0.12972	-0.17255	1.38499	0.168038	-0.32788	-0.46784	1.40027	0.839243	-0.04732
	0.7076	-0.6417	-0.31444	0.359736	-0.11377	-0.18082	1.38997	0.134174	-0.394	-0.56004	1.42473	0.924778	0.00784
	0.732	-0.65199	-0.33589	0.391114	-0.08001	-0.1944	1.39868	0.095358	-0.45934	-0.65722	1.44883	0.987031	0.05458
	0.7564	-0.66273	-0.36313	0.42315	-0.02845	-0.20734	1.41265	0.050253	-0.52295	-0.74941	1.46745	1.02134	0.084978
	0.7808	-0.67391	-0.39725	0.44849	0.039018	-0.21405	1.43331	-0.00328	-0.58668	-0.82787	1.47901	1.02892	0.093778
	0.8052	-0.68584	-0.43762	0.45863	0.117763	-0.21149	1.46034	-0.06468	-0.65425	-0.88846	1.48565	1.01549	0.082745
	0.8296	-0.6975	-0.48122	0.447597	0.199609	-0.1995	1.49282	-0.12807	-0.72874	-0.93322	1.49053	0.987667	0.059613
	0.854	-0.70765	-0.52295	0.414294	0.275138	-0.1798	1.53141	-0.18337	-0.80879	-0.96898	1.49403	0.952193	0.034869
	0.8784	-0.71724	-0.5574	0.361889	0.337187	-0.15565	1.57791	-0.22081	-0.88687	-1.00323	1.49358	0.916018	0.018023
	0.9028	-0.72988	-0.58125	0.296334	0.383388	-0.13173	1.63246	-0.23712	-0.95276	-1.04154	1.48774	0.884005	0.012647
	0.9272	-0.75056	-0.59485	0.225443	0.415673	-0.11275	1.69196	-0.23715	-0.99989	-1.08751	1.4786	0.858656	0.014275
	0.9516	-0.78392	-0.60209	0.157922	0.438122	-0.10192	1.75137	-0.22851	-1.02856	-1.14199	1.46984	0.841909	0.014545
	0.976	-0.83242	-0.60782	0.10293	0.45647	-0.10048	1.80557	-0.21628	-1.04403	-1.20219	1.464	0.834426	0.007105
	1.0004	-0.89598	-0.61546	0.069405	0.47818	-0.10767	1.85109	-0.20137	-1.05211	-1.26254	1.46183	0.834197	-0.0097
	1.0248	-0.9725	-0.6272	0.06265	0.51023	-0.12179	1.8874	-0.18161	-1.05654	-1.31693	1.46364	0.837883	-0.03372
	1.0492	-1.05678	-0.64507	0.080606	0.556253	-0.14217	1.91579	-0.15478	-1.05902	-1.36099	1.47043	0.843507	-0.06115
	1.0736	-1.14083	-0.67016	0.115637	0.616911	-0.16928	1.93664	-0.1208	-1.05859	-1.39383	1.4832	0.851391	-0.08725
	1.098	-1.21653	-0.70083	0.160917	0.692139	-0.20284	1.949	-0.0806	-1.05069	-1.41764	1.50134	0.86333	-0.10573
	1.1224	-1.2781	-0.73234	0.213795	0.780945	-0.24114	1.95252	-0.0354	-1.02926	-1.43521	1.52142	0.882451	-0.10852
	1.1468	-1.32324	-0.75801	0.273882	0.879687	-0.28209	1.94898	0.012089	-0.98999	-1.44898	1.53876	0.91245	-0.08925
	1.1712	-1.3522	-0.77111	0.340148	0.982005	-0.32452	1.94211	0.057848	-0.93278	-1.46367	1.55184	0.952969	-0.04884
	1.1956	-1.36507	-0.76699	0.408901	1.08024	-0.36893	1.93582	0.09868	-0.86315	-1.48807	1.56439	0.995445	0.004734
	1.22	-1.35985	-0.74458	0.472977	1.16839	-0.41768	1.93242	0.132557	-0.79124	-1.53117	1.58311	1.02566	0.06218
	1.2444	-1.33269	-0.7055	0.523474	1.24519	-0.4738	1.93192	0.157333	-0.72795	-1.59663	1.61442	1.03122	0.11741
	1.2688	-1.28103	-0.65188	0.553103	1.31441	-0.53859	1.9328	0.171146	-0.67968	-1.68153	1.662	1.0082	0.16741
	1.2932	-1.20784	-0.58616	0.559137	1.38311	-0.6092	1.93406	0.174597	-0.64592	-1.77783	1.72556	0.962403	0.209615
	1.3176	-1.12148	-0.51237	0.54471	1.45784	-0.67777	1.93573	0.171877	-0.62152	-1.87308	1.80119	0.905214	0.241885
	1.342	-1.03148	-0.43658	0.516836	1.54038	-0.734	1.93721	0.168947	-0.60013	-1.95232	1.88328	0.849675	0.265244
	1.3664	-0.94508	-0.36551	0.483274	1.62836	-0.76985	1.93673	0.170104	-0.57431	-2.0019	1.96681	0.809093	0.285227
	1.3908	-0.86602	-0.30459	0.452441	1.72022	-0.78163	1.93332	0.178067	-0.53285	-2.01218	2.04854	0.795453	0.310953
	1.4152	-0.79424	-0.25674	0.433914	1.81903	-0.76826	1.92867	0.198074	-0.45926	-1.97659	2.12612	0.817696	0.35266
	1.4396	-0.72698	-0.22195	0.436782	1.93232	-0.72918	1.92779	0.239294	-0.33215	-1.88901	2.19697	0.881439	0.420031
	1.464	-0.66056	-0.19767	0.469219	2.06963	-0.66263	1.93915	0.312321	-0.12657	-1.74303	2.25975	0.990233	0.523234
	1.4884	-0.59076	-0.17955	0.539074	2.24092	-0.56437	1.97309	0.427271	0.181918	-1.53372	2.31681	1.14782	0.67204
	1.5128	-0.51201	-0.16235	0.652159	2.45343	-0.42783	2.03828	0.592801	0.608671	-1.26106	2.3741	1.35781	0.870466
	1.5372	-0.41804	-0.14072	0.810299	2.70797	-0.24633	2.13844	0.814526	1.15101	-0.93191	2.43804	1.61832	1.11328
	1.5616	-0.30268	-0.11054	1.01155	2.99916	-0.01696	2.27172	1.0937	1.78444	-0.55889	2.51289	1.9183	1.3871
	1.586	-0.15884	-0.07027	1.25156	3.3164	0.256737	2.43215	1.4267	2.46614	-0.15788	2.60096	2.24191	1.67199
	1.6104	0.022936	-0.02059	1.52501	3.64338	0.565812	2.61185	1.80557	3.1445	0.254979	2.7047	2.5747	1.94543
	1.6348	0.253165	0.037273	1.82648	3.96107	0.899251	2.80306	2.2198	3.77152	0.665685	2.82786	2.90499	2.19005
	1.6592	0.538654	0.10277	2.15025	4.25237	1.24629	3.00004	2.65708	4.31219	1.06234	2.9739	3.22279	2.39758
	1.6836	0.877955	0.176011	2.48967	4.50427	1.59587	3.19974	3.10358	4.74731	1.43362	3.14397	3.51828	2.56671
	1.708	1.26065	0.257457	2.8367	4.70799	1.9348	3.40147	3.54477	5.07175	1.76936	3.33628	3.78148	2.69918
	1.7324	1.67005	0.347918	3.18189	4.85934	2.24864	3.60565	3.96653	5.2913	2.06304	3.54554	4.00442	2.79724
	1.7568	2.08658	0.448708	3.51548	4.9604	2.52546	3.81185	4.3564	5.41777	2.31222	3.76316	4.18395	2.86354
	1.7812	2.48957	0.561076	3.82823	5.01941	2.75918	4.01715	4.70597	5.46327	2.51686	3.97973	4.32205	2.90218
	1.8056	2.85825	0.68513	4.11141	5.0477	2.95005	4.21692	5.01165	5.43821	2.67897	4.18668	4.42443	2.91759
	1.83	3.17476	0.819143	4.3575	5.05671	3.10243	4.40778	5.2715	5.35472	2.80288	4.3761	4.49913	2.91144
	1.8544	3.42859	0.959793	4.56183	5.05635	3.22251	4.59003	5.48271	5.22817	2.8946	4.54176	4.55452	2.88127
	1.8788	3.62012	1.10389	4.72457	5.05295	3.31792	4.76728	5.64358	5.07488	2.96073	4.68185	4.59663	2.82368
	1.9032	3.7603	1.25036	4.85045	5.04667	3.39747	4.94462	5.7558	4.91056	3.00824	4.80143	4.6277	2.73892
	1.9276	3.86441	1.40026	4.9465	5.03192	3.46861	5.12637	5.8243	4.7478	3.04382	4.91118	4.64605	2.63218
	1.952	3.94431	1.55509	5.0211	5.00222	3.53482	5.31374	5.85617	4.59295	3.07249	5.02071	4.64658	2.51019
	1.9764	4.00564	1.71577	5.08352	4.95397	3.59659	5.50477	5.85998	4.44794	3.09795	5.13311	4.62261	2.37807
	2.0008	4.05035	1.88224	5.14106	4.88555	3.65423	5.69644	5.84541	4.31437	3.12256	5.2461	4.56847	2.24005
	2.0252	4.08049	2.05306	5.1962	4.79624	3.70869	5.88586	5.82188	4.19333	3.14529	5.3571	4.48123	2.10126
	2.0496	4.09967	2.22569	5.24653	4.6883	3.76076	6.07084	5.796	4.08392	3.16222	5.46617	4.36136	1.96785
	2.074	4.11162	2.39806	5.28642	4.56567	3.81112	6.25057	5.7703	3.98422	3.17144	5.57397	4.21345	1.84621
	2.0984	4.11843	2.5697	5.31007	4.43011	3.86135	6.42477	5.74335	3.89228	3.17663	5.67798	4.04601	1.74048
	2.1228	4.12072	2.74062	5.31427	4.28315	3.91342	6.5926	5.71108	3.80566	3.18472	5.77289	3.87081	1.65026
	2.1472	4.1189	2.90861	5.29816	4.12944	3.9685	6.7531	5.66919	3.72046	3.20143	5.85405	3.70098	1.57201
	2.1716	4.11371	3.06834	5.26235	3.97405	4.027	6.90554	5.61504	3.63128	3.23105	5.91937	3.5454	1.50122
	2.196	4.10654	3.2134	5.20954	3.82007	4.09007	7.04933	5.54875	3.53326	3.27855	5.96888	3.40567	1.43231
	2.2204	4.09984	3.33962	5.1449	3.67072	4.15967	7.18441	5.47273	3.4246	3.34847	6.00488	3.27972	1.36077
	2.2448	4.09713	3.44725	5.07496	3.5303	4.23629	7.31161	5.38857	3.30596	3.44134	6.03277	3.16621	1.28691
	2.2692	4.10151	3.54057	5.00677	3.40058	4.31683	7.43258	5.29497	3.17945	3.55193	6.06009	3.06585	1.21466
	2.2936	4.1142	3.62537	4.9466	3.2786	4.39519	7.54982	5.19018	3.05026	3.67035	6.09518	2.98003	1.1467
	2.318	4.13437	3.7061	4.89794	3.16093	4.46522	7.66742	5.07473	2.92735	3.78608	6.14673	2.9083	1.08165
	2.3424	4.15891	3.78567	4.86126	3.04875	4.52413	7.79157	4.95175	2.82087	3.89249	6.22237	2.84856	1.01549
	2.3668	4.18281	3.8677	4.83631	2.94596	4.57442	7.92988	4.82721	2.73787	3.98959	6.32645	2.79938	0.946732
	2.3912	4.20345	3.95773	4.82428	2.85548	4.62268	8.09027	4.70859	2.67944	4.08421	6.45985	2.76011	0.880665
	2.4156	4.22591	4.06263	4.82805	2.77805	4.67653	8.27979	4.60114	2.64214	4.18752	6.62137	2.72998	0.827618
	2.44	4.26215	4.18934	4.84971	2.71207	4.74302	8.50243	4.50747	2.62199	4.3103	6.80764	2.70925	0.796382
	2.4644	4.32509	4.34316	4.88892	2.65514	4.82937	8.75624	4.43101	2.61726	4.45807	7.01255	2.69971	0.791655
	2.4888	4.42423	4.5256	4.94505	2.60556	4.94372	9.03261	4.37558	2.62787	4.62896	7.22783	2.70309	0.815865
	2.5132	4.56475	4.73377	5.01846	2.56188	5.09281	9.31887	4.34196	2.65356	4.816	7.44282	2.71874	0.867115
	2.5376	4.74769	4.96218	5.10621	2.52241	5.27725	9.60299	4.32841	2.69222	5.01033	7.64468	2.7429	0.936025
	2.562	4.96913	5.20488	5.19884	2.48606	5.4893	9.87599	4.3342	2.73615	5.20235	7.82239	2.77151	1.00782
	2.5864	5.21847	5.45647	5.2833	2.45418	5.71518	10.131	4.3611	2.77051	5.38302	7.97058	2.803	1.06597
	2.6108	5.47917	5.71216	5.34857	2.43175	5.93945	10.3628	4.41194	2.77983	5.54631	8.0879	2.83723	1.09578
	2.6352	5.73394	5.96795	5.38961	2.42462	6.14908	10.5695	4.48773	2.75507	5.6902	8.1738	2.8734	1.08967
	2.6596	5.97004	6.21967	5.40767	2.43374	6.3359	10.7538	4.58485	2.69486	5.81574	8.22923	2.90946	1.04919
	2.684	6.18155	6.46205	5.40644	2.45266	6.49741	10.9222	4.69433	2.60522	5.92605	8.25859	2.94226	0.981169
	2.7084	6.36937	6.69056	5.38821	2.4712	6.63603	11.0815	4.80438	2.49788	6.02476	8.26918	2.96856	0.893057
	2.7328	6.53894	6.90417	5.35321	2.48167	6.75675	11.2373	4.90464	2.38539	6.11552	8.26799	2.98738	0.791384
	2.7572	6.69523	7.1048	5.30027	2.48207	6.86353	11.3936	4.98846	2.27689	6.20274	8.25842	3.00154	0.682337
	2.7816	6.83935	7.29415	5.22862	2.47521	6.95697	11.5515	5.05216	2.17707	6.29044	8.24112	3.01632	0.572192
	2.806	6.96903	7.47157	5.14145	2.46699	7.035	11.7089	5.09324	2.08751	6.38028	8.2193	3.03604	0.467021
	2.8304	7.08089	7.63508	5.04762	2.46342	7.09597	11.8614	5.10849	2.00831	6.47243	8.20059	3.06213	0.370829
	2.8548	7.17335	7.78359	4.95786	2.46673	7.14149	12.0049	5.09355	1.93775	6.56729	8.19216	3.09413	0.28179
	2.8792	7.24943	7.91784	4.87907	2.4751	7.17672	12.1363	5.0447	1.87195	6.66538	8.19548	3.13172	0.1921
	2.9036	7.31744	8.03971	4.81181	2.4851	7.20901	12.2517	4.96183	1.80561	6.7667	8.20692	3.17556	0.095598
	2.928	7.38741	8.1515	4.75239	2.492	7.24613	12.3475	4.85133	1.73344	6.87162	8.22175	3.22558	-0.00443
	2.9524	7.46678	8.25645	4.69828	2.49012	7.29545	12.4213	4.72689	1.65274	6.98184	8.23739	3.27858	-0.09772
	2.9768	7.56067	8.35862	4.65143	2.47664	7.36423	12.4751	4.60687	1.56561	7.10005	8.25486	3.3287	-0.17646
	3.0012	7.67371	8.46172	4.61694	2.45364	7.45907	12.5148	4.50955	1.47848	7.22969	8.27814	3.37052	-0.24111
	3.0256	7.80973	8.56851	4.6005	2.42415	7.58419	12.5475	4.44787	1.39827	7.3759	8.3132	3.40166	-0.30006
	3.05	7.97122	8.68195	4.60737	2.38755	7.74225	12.5787	4.42806	1.32792	7.54509	8.36648	3.42198	-0.36499
	3.0744	8.15858	8.80653	4.64054	2.34096	7.9363	12.6121	4.45382	1.26478	7.74138	8.44187	3.43044	-0.44398
	3.0988	8.36799	8.9476	4.69808	2.28397	8.16862	12.6504	4.52871	1.20248	7.96451	8.53848	3.42349	-0.53725
	3.1232	8.59154	9.10921	4.77295	2.22136	8.4381	12.6959	4.65216	1.13493	8.21111	8.65034	3.39801	-0.6379
	3.1476	8.82034	9.292	4.85515	2.16101	8.73972	12.7488	4.81474	1.06126	8.47616	8.76792	3.35628	-0.73533
	3.172	9.04667	9.4925	4.93404	2.10944	9.06519	12.8081	4.99881	0.987218	8.75294	8.88312	3.30674	-0.81929
	3.1964	9.2645	9.70376	5.00166	2.07044	9.40253	12.8721	5.18334	0.920541	9.03355	8.99387	3.25957	-0.88326
	3.2208	9.46982	9.9167	5.05535	2.04643	9.73635	12.9406	5.34814	0.866325	9.31076	9.10254	3.2227	-0.92559
	3.2452	9.6599	10.121	5.09588	2.03822	10.051	13.0168	5.47658	0.827363	9.57891	9.21201	3.2012	-0.94926
	3.2696	9.83383	10.3067	5.12366	2.04433	10.3342	13.1067	5.55761	0.804872	9.83223	9.32437	3.19922	-0.95951
	3.294	9.99624	10.4663	5.13825	2.06229	10.5789	13.2145	5.58742	0.796258	10.0629	9.43997	3.22186	-0.96104
	3.3184	10.1593	10.5963	5.14074	2.09036	10.7856	13.3387	5.57085	0.794333	10.262	9.55538	3.27346	-0.95893
	3.3428	10.3387	10.697	5.13647	2.12785	10.9607	13.4722	5.52144	0.791189	10.4237	9.66358	3.353	-0.96089
	3.3672	10.5463	10.7714	5.13453	2.17496	11.112	13.6048	5.45899	0.784473	10.5474	9.75799	3.45213	-0.97483
	3.3916	10.7851	10.8241	5.14374	2.23203	11.2431	13.7261	5.40564	0.77963	10.6359	9.83605	3.55836	-1.00476
	3.416	11.0483	10.8605	5.16915	2.29737	11.3519	13.8284	5.38119	0.785175	10.692	9.89945	3.66135	-1.04975
	3.4404	11.322	10.885	5.21113	2.36639	11.4344	13.9069	5.39843	0.807013	10.7162	9.95134	3.75685	-1.1053
	3.4648	11.5905	10.9001	5.26657	2.43335	11.4881	13.9592	5.46009	0.84622	10.7072	9.9938	3.84525	-1.16485
	3.4892	11.8441	10.9049	5.33106	2.49347	11.5124	13.9846	5.55924	0.899218	10.665	10.0286	3.92896	-1.22135
	3.5136	12.0808	10.8951	5.3993	2.54462	11.5065	13.9842	5.68311	0.960089	10.5932	10.0584	4.01124	-1.26838
	3.538	12.3032	10.8635	5.46464	2.58705	11.4705	13.9599	5.81792	1.0243	10.4988	10.0858	4.09316	-1.30179
	3.5624	12.514	10.8029	5.52015	2.62135	11.4046	13.9142	5.95355	1.0913	10.3887	10.1102	4.17034	-1.32136
	3.5868	12.7144	10.7093	5.5619	2.64745	11.3076	13.8503	6.08472	1.16348	10.2679	10.1276	4.23435	-1.32992
	3.6112	12.9039	10.5834	5.59151	2.66538	11.1782	13.7733	6.2079	1.24208	10.1387	10.133	4.27856	-1.32963
	3.6356	13.0774	10.4298	5.61427	2.67559	11.018	13.6895	6.31889	1.32446	10.0024	10.1229	4.30284	-1.32082
	3.66	13.2257	10.2543	5.63488	2.67951	10.8314	13.6035	6.41279	1.40447	9.86076	10.0939	4.31337	-1.30398
	3.6844	13.3408	10.0623	5.65539	2.68044	10.6247	13.5168	6.48475	1.47432	9.71659	10.0428	4.31949	-1.27858
	3.7088	13.4186	9.8588	5.67614	2.68118	10.4051	13.4273	6.53217	1.52828	9.57194	9.96821	4.33089	-1.24073
	3.7332	13.4585	9.64896	5.69729	2.68121	10.1798	13.3324	6.55756	1.56669	9.4283	9.87387	4.35527	-1.18676
	3.7576	13.4618	9.43824	5.71908	2.67844	9.95596	13.2312	6.56832	1.59699	9.28696	9.76707	4.39619	-1.11748
	3.782	13.4313	9.23166	5.74244	2.67345	9.73996	13.1246	6.5735	1.631	9.14704	9.65583	4.45213	-1.03736
	3.8064	13.3713	9.03353	5.76935	2.67098	9.53705	13.0146	6.58066	1.67887	9.00522	9.54728	4.5176	-0.95353
	3.8308	13.2861	8.84781	5.80209	2.67682	9.34901	12.9016	6.59371	1.74389	8.85832	9.44737	4.58598	-0.87504
	3.8552	13.1794	8.67833	5.8424	2.69327	9.17326	12.7846	6.61212	1.82087	8.70568	9.35931	4.65196	-0.80874
	3.8796	13.0539	8.52788	5.89131	2.71775	9.00483	12.6612	6.63227	1.89864	8.55031	9.28162	4.71255	-0.75605
	3.904	12.9117	8.39653	5.94844	2.74539	8.84076	12.529	6.64984	1.96482	8.39758	9.20901	4.76668	-0.7138
	3.9284	12.7552	8.28154	6.01136	2.77388	8.68373	12.388	6.66183	2.00965	8.25212	9.13609	4.81358	-0.67671
	3.9528	12.5853	8.17847	6.0762	2.80514	8.53925	12.2401	6.66729	2.02906	8.11614	9.06071	4.85237	-0.63984
	3.9772	12.4006	8.08204	6.13895	2.83933	8.40879	12.088	6.66579	2.02555	7.98909	8.98419	4.88339	-0.60047
	4.0016	12.1998	7.98699	6.19657	2.86883	8.289	11.9331	6.65427	2.00547	7.86788	8.90945	4.9074	-0.55949
	4.026	11.9856	7.88909	6.24854	2.88071	8.17611	11.7766	6.62514	1.97692	7.7493	8.83935	4.92296	-0.52113
	4.0504	11.7649	7.78542	6.29818	2.8642	8.06887	11.6202	6.57001	1.94846	7.63234	8.77593	4.9257	-0.48811
	4.0748	11.5463	7.6751	6.35128	2.81623	7.9677	11.4653	6.48732	1.92651	7.51715	8.71957	4.91047	-0.45556
	4.0992	11.3363	7.56045	6.41205	2.74279	7.87133	11.3113	6.38405	1.9141	7.40292	8.66948	4.87423	-0.41257
	4.1236	11.1381	7.44678	6.4796	2.6566	7.77368	11.1556	6.26965	1.91071	7.28711	8.62483	4.81818	-0.35154
	4.148	10.9526	7.34005	6.54718	2.57209	7.66472	10.9961	6.15126	1.91115	7.1671	8.58441	4.74757	-0.27544
	4.1724	10.7795	7.24378	6.60426	2.50091	7.53552	10.833	6.0343	1.90858	7.04078	8.54582	4.66866	-0.19786
	4.1968	10.6177	7.15761	6.6391	2.45041	7.3838	10.6691	5.92345	1.9018	6.90456	8.50639	4.58701	-0.13733
	4.2212	10.4641	7.07824	6.63969	2.42402	7.21584	10.509	5.82271	1.8968	6.75448	8.46499	4.50794	-0.10859
	4.2456	10.3144	7.00063	6.59613	2.42146	7.04243	10.3577	5.73567	1.89974	6.59118	8.42257	4.43537	-0.11483
	4.27	10.1654	6.91927	6.5048	2.43706	6.8734	10.2182	5.66462	1.91149	6.42201	8.38088	4.37089	-0.14718
	4.2944	10.0147	6.82973	6.37089	2.45947	6.7156	10.0898	5.6089	1.92897	6.258	8.34107	4.31569	-0.19222
	4.3188	9.85906	6.73024	6.20798	2.47564	6.57262	9.9685	5.56487	1.9488	6.10905	8.30313	4.27143	-0.23822
	4.3432	9.69518	6.62255	6.03477	2.47495	6.44428	9.84862	5.52698	1.96784	5.97909	8.26571	4.23956	-0.27419
	4.3676	9.52201	6.51159	5.86835	2.45146	6.32717	9.72599	5.48918	1.98149	5.86457	8.22652	4.2207	-0.28899
	4.392	9.34223	6.40356	5.71836	2.4059	6.21603	9.6015	5.44729	1.98499	5.75854	8.18426	4.21317	-0.27586
	4.4164	9.16127	6.30342	5.58648	2.34543	6.10466	9.48001	5.40084	1.9778	5.6556	8.14015	4.21167	-0.23706
	4.4408	8.98493	6.21374	5.46999	2.28141	5.98656	9.36426	5.35169	1.96468	5.55253	8.09596	4.20997	-0.18252
	4.4652	8.81669	6.13517	5.36635	2.22622	5.85644	9.25137	5.3014	1.9511	5.44718	8.05142	4.20517	-0.1234
	4.4896	8.6566	6.06677	5.27563	2.18954	5.71219	9.13582	5.24924	1.93872	5.33933	8.00496	4.19682	-0.06678
	4.514	8.50248	6.00623	5.1979	2.17454	5.55484	9.01389	5.19107	1.92543	5.23107	7.95537	4.18347	-0.01442
	4.5384	8.35265	5.95052	5.12952	2.17632	5.3871	8.88538	5.11991	1.90942	5.12455	7.90179	4.16209	0.03557
	4.5628	8.20855	5.8966	5.06451	2.18458	5.21236	8.75356	5.02944	1.89158	5.02033	7.84323	4.13014	0.086035
	4.5872	8.07452	5.84155	4.99916	2.18808	5.03503	8.62354	4.91794	1.87341	4.918	7.77902	4.08798	0.138762
	4.6116	7.95498	5.78334	4.93329	2.176	4.86072	8.4999	4.78932	1.8546	4.81782	7.70892	4.03908	0.194499
	4.636	7.85221	5.7215	4.86798	2.13844	4.69446	8.38567	4.65252	1.83393	4.7215	7.63277	3.98793	0.253367
	4.6604	7.76572	5.65619	4.80377	2.06954	4.5393	8.28223	4.51969	1.81113	4.63065	7.55028	3.93852	0.313862
	4.6848	7.69252	5.58727	4.74033	1.97067	4.39757	8.19	4.40265	1.78711	4.54511	7.46176	3.89217	0.372221
	4.7092	7.62825	5.51463	4.67721	1.85133	4.27191	8.1096	4.309	1.7623	4.46246	7.36919	3.8459	0.42483
	4.7336	7.56928	5.43865	4.61406	1.72574	4.16351	8.04113	4.23874	1.73538	4.37859	7.27508	3.79531	0.471301
	4.758	7.51355	5.35983	4.54899	1.60645	4.06976	7.98238	4.18391	1.70471	4.28988	7.17978	3.73815	0.513659
	4.7824	7.45966	5.27857	4.47861	1.49975	3.98412	7.92801	4.1339	1.67088	4.19571	7.08206	3.67436	0.554077
	4.8068	7.40556	5.19543	4.40205	1.40585	3.89908	7.87037	4.08156	1.63771	4.09888	6.98212	3.60651	0.595207
	4.8312	7.34887	5.11037	4.32314	1.32296	3.81052	7.80133	4.02423	1.6099	4.00396	6.88107	3.54084	0.641453
	4.8556	7.28884	5.02176	4.24664	1.25024	3.71937	7.71518	3.96193	1.58866	3.91581	6.77798	3.48389	0.698263
	4.88	7.2271	4.92698	4.17315	1.18632	3.62808	7.61078	3.8971	1.57058	3.83901	6.66979	3.43653	0.768359
	4.9044	7.16619	4.82413	4.09888	1.12802	3.53637	7.49098	3.83461	1.55039	3.77675	6.55373	3.39306	0.849307
	4.9288	7.10955	4.71337	4.01972	1.07266	3.44173	7.35989	3.77938	1.52371	3.72965	6.42783	3.34665	0.93669
	4.9532	7.0619	4.59783	3.93456	1.01937	3.34247	7.22104	3.73324	1.48868	3.69714	6.2906	3.29501	1.02765
	4.9776	7.02754	4.48339	3.84479	0.967697	3.23801	7.07853	3.69291	1.44523	3.6802	6.14342	3.24097	1.12036
	5.002	7.00978	4.3769	3.75192	0.916794	3.12725	6.93824	3.64981	1.39317	3.68059	5.99249	3.18926	1.21144
