# Supplementary material for: Learning of probabilistic punishment as a model of anxiety produces changes in action but not punisher encoding in the dmPFC and VTA
Source: eLife. 2022 Sep 14;11:e78912. doi: 10.7554/eLife.78912 (PMC9525102; doi:10.7554/eLife.78912)
Supplement: Figure 4—source data 1. [file elife-78912-fig4-data1.xlsx]

## Sheet: Figure 4A
											CUE (left panel; dmpfc)																													Action + Footshock (right panel; dmpfc)
Session		JP1	JP1	JP1	JP1	JP1	JP1	JP1	JP2	JP2	JP2	JP2	JP2	JP2	JP2	JP2	JP2	JP3	JP3	JP3	JP3	JP3	JP3	JP3	JP3			Session	JP1	JP1	JP1	JP1	JP1	JP1	JP1	JP2	JP2	JP2	JP2	JP2	JP2	JP2	JP2	JP2	JP3	JP3	JP3	JP3	JP3
Subject		S283	S256	S251	S257	S318	S320	S321	S251	S252	S256	S257	S283	S320	S318	S321	S264	S256	S257	S251	S320	S252	S318	S321	S264			Subject	S283	S256	S251	S257	S318	S320	S321	S251	S252	S256	S257	S283	S320	S318	S321	S264	S256	S257	S251	S320	S252
		z-score of df/f	z-score of df/f	z-score of df/f	z-score of df/f	z-score of df/f	z-score of df/f	z-score of df/f	z-score of df/f	z-score of df/f	z-score of df/f	z-score of df/f	z-score of df/f	z-score of df/f	z-score of df/f	z-score of df/f	z-score of df/f	z-score of df/f	z-score of df/f	z-score of df/f	z-score of df/f	z-score of df/f	z-score of df/f	z-score of df/f	z-score of df/f				z-score of df/f	z-score of df/f	z-score of df/f	z-score of df/f	z-score of df/f	z-score of df/f	z-score of df/f	z-score of df/f	z-score of df/f	z-score of df/f	z-score of df/f	z-score of df/f	z-score of df/f	z-score of df/f	z-score of df/f	z-score of df/f	z-score of df/f	z-score of df/f	z-score of df/f	z-score of df/f	z-score of df/f
	Peri-cue time - sec
	-1.488	-0.238004	2.63823	-1.66126	0.843662	-0.501374	0.421117	0.866426	-2.13393	0.233175	3.25665	-0.157412	1.67878	-0.694763	2.04174	-0.264729	-0.38277	-2.7026	-0.783246	-1.14092	-1.77535	-0.214697	0.00649886	-0.237212	-0.85127			Peri-action time - sec
	-1.464	-0.0950697	2.67594	-1.62661	0.996007	-0.683469	0.454308	1.03859	-2.03661	0.254446	3.1871	-0.136005	1.78342	-0.702042	2.02962	-0.179933	-0.3698	-2.72125	-0.894568	-1.06419	-1.67474	-0.194413	0.140026	-0.0417511	-0.85141			-2.0496	0.11494	-0.457418	0.246075	0.126778	0.517051	0.24326	1.08368	-0.759999	-0.829146	-0.975542	-1.09214	-0.971993	0.381683	0.073757	0.126897	0.372266	-0.693406	-0.56859	-0.57859	-0.540933	-0.800802
	-1.44	0.0936725	2.69646	-1.59764	1.11299	-0.820455	0.487367	1.21018	-1.87444	0.330704	3.12114	-0.0966255	1.86448	-0.719462	2.04537	-0.094281	-0.34708	-2.73249	-0.96203	-0.969828	-1.57467	-0.201396	0.261495	0.193104	-0.85147			-2.0252	-0.00333138	-0.413864	0.251928	0.0647728	0.510435	0.30799	1.21225	-0.631161	-0.851901	-1.04525	-1.07808	-0.959163	0.328149	0.0715386	0.133029	0.38464	-0.899196	-0.547318	-0.488311	-0.491369	-0.877706
	-1.416	0.294358	2.71	-1.57553	1.18011	-0.900286	0.519179	1.3767	-1.6583	0.459521	3.05158	-0.0419846	1.91363	-0.747759	2.09979	-0.0274409	-0.31475	-2.7374	-0.983566	-0.874999	-1.49005	-0.216367	0.371397	0.442042	-0.84822			-2.0008	-0.124346	-0.36389	0.252554	0.00653637	0.55084	0.362775	1.30894	-0.494544	-0.919968	-1.12328	-1.06795	-0.892705	0.257703	0.0574535	0.130469	0.393667	-1.11125	-0.541856	-0.374154	-0.447033	-0.93301
	-1.392	0.478328	2.72526	-1.55951	1.19016	-0.91862	0.547348	1.52729	-1.4015	0.624298	2.95302	0.0244392	1.92653	-0.784893	2.19396	0.0130567	-0.27469	-2.73662	-0.960354	-0.79512	-1.43941	-0.226053	0.472794	0.675474	-0.8388			-1.9764	-0.246536	-0.322389	0.25794	-0.0366522	0.624213	0.402921	1.37558	-0.352406	-1.0214	-1.19629	-1.06748	-0.772152	0.166335	0.0271601	0.110978	0.397755	-1.32084	-0.547565	-0.246707	-0.427256	-0.962025
	-1.368	0.628939	2.74563	-1.54751	1.14904	-0.875498	0.568802	1.64975	-1.11866	0.802287	2.80422	0.0970085	1.90319	-0.828612	2.3182	0.0278867	-0.23034	-2.72996	-0.893723	-0.738117	-1.43368	-0.226675	0.569498	0.867647	-0.82087			-1.952	-0.366681	-0.29964	0.278671	-0.0606247	0.711716	0.42669	1.42538	-0.208425	-1.11886	-1.24958	-1.07891	-0.609753	0.0529954	-0.0233906	0.0671926	0.394563	-1.51477	-0.561037	-0.119994	-0.441421	-0.969094
	-1.344	0.742691	2.77036	-1.53641	1.07462	-0.777139	0.580719	1.73852	-0.82452	0.97244	2.61413	0.169534	1.84626	-0.877435	2.45528	0.0161802	-0.18544	-2.71661	-0.785362	-0.705095	-1.46221	-0.221883	0.663226	1.0003	-0.79166			-1.9276	-0.479213	-0.298685	0.321841	-0.0688766	0.798068	0.43471	1.46844	-0.0676924	-1.16183	-1.26513	-1.10547	-0.426483	-0.0788059	-0.0959877	0.00492962	0.381175	-1.67837	-0.588388	-0.00943909	-0.485123	-0.965
	-1.32	0.824578	2.79624	-1.52165	0.98806	-0.634242	0.581571	1.79715	-0.533552	1.11209	2.43	0.233689	1.75914	-0.929651	2.58519	-0.0265306	-0.14345	-2.69602	-0.639433	-0.693169	-1.49716	-0.217669	0.751853	1.06286	-0.7493			-1.9032	-0.576801	-0.317807	0.388825	-0.0698352	0.872869	0.428665	1.50137	0.0655344	-1.11191	-1.23111	-1.15444	-0.244265	-0.222391	-0.188697	-0.0582128	0.355703	-1.79953	-0.64081	0.0710172	-0.542127	-0.963757
	-1.296	0.880851	2.82014	-1.4966	0.90444	-0.460515	0.570989	1.82966	-0.261535	1.19217	2.30558	0.278546	1.64524	-0.982987	2.68935	-0.0982793	-0.10715	-2.66971	-0.464125	-0.69785	-1.51336	-0.21786	0.830489	1.05492	-0.69544			-1.8788	-0.65218	-0.355104	0.475793	-0.073489	0.926567	0.410057	1.51279	0.190609	-0.961719	-1.15591	-1.23793	-0.0793931	-0.370683	-0.295794	-0.10687	0.318554	-1.87237	-0.721097	0.112115	-0.589747	-0.976215
	-1.272	0.914053	2.8418	-1.45287	0.830627	-0.278378	0.548825	1.83623	-0.0268975	1.18899	2.26444	0.295436	1.50832	-1.03496	2.75415	-0.182406	-0.07825	-2.64234	-0.271481	-0.713284	-1.50631	-0.223858	0.894235	0.988693	-0.6347			-1.8544	-0.700035	-0.408909	0.575971	-0.0878875	0.953164	0.379618	1.48793	0.311626	-0.730828	-1.0667	-1.36987	0.0603374	-0.516982	-0.409284	-0.135746	0.271906	-1.89815	-0.817343	0.110772	-0.61263	-1.00282
	-1.248	0.922225	2.8631	-1.38207	0.767646	-0.117142	0.514826	1.81629	0.151783	1.0987	2.29056	0.282531	1.35325	-1.08297	2.77311	-0.254754	-0.05787	-2.62027	-0.0742932	-0.73034	-1.4864	-0.229735	0.939966	0.882532	-0.57137			-1.83	-0.718526	-0.475179	0.681745	-0.117571	0.961656	0.337627	1.41595	0.435798	-0.451482	-0.993264	-1.55919	0.174221	-0.653405	-0.52065	-0.142767	0.218393	-1.88342	-0.911287	0.06963	-0.612157	-1.03502
	-1.224	0.901324	2.8857	-1.27824	0.711778	0.00262006	0.468877	1.76869	0.261776	0.939772	2.34097	0.243985	1.18687	-1.12449	2.74601	-0.301431	-0.04681	-2.60913	0.117355	-0.736046	-1.46398	-0.217326	0.966241	0.747988	-0.50707			-1.8056	-0.71042	-0.547212	0.785907	-0.162959	0.973574	0.284827	1.3063	0.569789	-0.15465	-0.953527	-1.80471	0.264916	-0.769898	-0.621786	-0.122192	0.160551	-1.83659	-0.990911	-0.00407319	-0.594289	-1.06311
	-1.2	0.849442	2.91058	-1.1397	0.656376	0.0800244	0.411435	1.69366	0.301572	0.74754	2.36949	0.184668	1.01785	-1.15726	2.67681	-0.326217	-0.04456	-2.61261	0.296234	-0.71749	-1.44833	-0.167364	0.972701	0.585934	-0.44179			-1.7812	-0.683001	-0.617724	0.882422	-0.22028	1.00222	0.223214	1.1861	0.716227	0.136835	-0.949413	-2.09465	0.335312	-0.856218	-0.705782	-0.0715119	0.101056	-1.76462	-1.0542	-0.100547	-0.55462	-1.07914
	-1.176	0.771152	2.93732	-0.970228	0.597228	0.128839	0.34408	1.5928	0.281847	0.561087	2.34971	0.106611	0.855704	-1.18	2.57175	-0.338272	-0.04933	-2.63141	0.456624	-0.667761	-1.44775	-0.075818	0.960362	0.396293	-0.37648			-1.7568	-0.6466	-0.681921	0.966636	-0.285261	1.04081	0.15623	1.07553	0.872391	0.403175	-0.977477	-2.41105	0.38672	-0.90564	-0.767825	-0.00499381	0.0425593	-1.67346	-1.10566	-0.210611	-0.481184	-1.0762
	-1.152	0.679096	2.96268	-0.778791	0.535906	0.165963	0.2696	1.46492	0.221308	0.40906	2.27581	0.0115684	0.709629	-1.19361	2.43814	-0.339286	-0.05945	-2.66239	0.594306	-0.589506	-1.46625	0.0454444	0.932491	0.1877	-0.31376			-1.7324	-0.612721	-0.74108	1.03503	-0.356452	1.07375	0.0885267	0.976096	1.03157	0.625286	-1.04016	-2.73659	0.418703	-0.917014	-0.804922	0.047027	-0.0127429	-1.57003	-1.15386	-0.327979	-0.364138	-1.05276
	-1.128	0.591217	2.98151	-0.57818	0.476116	0.203548	0.191331	1.31212	0.14042	0.306644	2.1403	-0.0946372	0.586611	-1.20098	2.28451	-0.326392	-0.07403	-2.7002	0.706569	-0.494457	-1.50472	0.17835	0.89469	-0.0195109	-0.25747			-1.708	-0.590785	-0.802845	1.08492	-0.432205	1.09642	0.0253749	0.882591	1.1859	0.790396	-1.13592	-3.05761	0.43035	-0.893528	-0.814541	0.0530349	-0.062606	-1.46136	-1.20633	-0.448729	-0.200804	-1.01384
	-1.104	0.525808	2.98845	-0.38325	0.419846	0.246914	0.112624	1.14721	0.0569515	0.258775	1.92523	-0.199758	0.489201	-1.20479	2.12074	-0.301705	-0.09254	-2.74055	0.791021	-0.398901	-1.55894	0.306355	0.85356	-0.194507	-0.21215			-1.6836	-0.582869	-0.876423	1.11454	-0.507518	1.1167	-0.0284703	0.793511	1.32867	0.892369	-1.24798	-3.36162	0.420885	-0.839476	-0.79493	-0.00731134	-0.103979	-1.35221	-1.26133	-0.568843	0.000337828	-0.964341
	-1.08	0.496862	2.98017	-0.209179	0.36879	0.298593	0.0367846	0.989298	-0.0154927	0.260566	1.61932	-0.285652	0.414993	-1.20571	1.95665	-0.275516	-0.1151	-2.78086	0.845428	-0.317532	-1.61456	0.419281	0.814545	-0.305311	-0.18186			-1.6592	-0.581078	-0.967146	1.12339	-0.575708	1.13993	-0.0699177	0.701335	1.45478	0.92838	-1.35429	-3.63583	0.389248	-0.758111	-0.747399	-0.133029	-0.134051	-1.24426	-1.30605	-0.682926	0.216805	-0.905088
	-1.056	0.509776	2.95815	-0.0693351	0.325218	0.365213	-0.0331758	0.854495	-0.0680751	0.29709	1.23806	-0.335071	0.358276	-1.20284	1.80003	-0.265598	-0.14304	-2.81868	0.869425	-0.259988	-1.65122	0.511024	0.780154	-0.335666	-0.16863			-1.6348	-0.571635	-1.07447	1.11249	-0.630579	1.16605	-0.0977143	0.584571	1.55962	0.901696	-1.4407	-3.86841	0.334402	-0.652138	-0.677514	-0.298024	-0.152375	-1.13508	-1.32131	-0.785782	0.418529	-0.833894
	-1.032	0.558397	2.9283	0.0269234	0.289093	0.456378	-0.0944608	0.747548	-0.0993692	0.34803	0.826543	-0.339276	0.312643	-1.19554	1.65647	-0.29046	-0.17811	-2.85157	0.864838	-0.231313	-1.65776	0.570953	0.749894	-0.295312	-0.17049			-1.6104	-0.542125	-1.19289	1.0838	-0.666039	1.19761	-0.112219	0.429821	1.63775	0.826284	-1.50543	-4.05172	0.256623	-0.524856	-0.594154	-0.466403	-0.161166	-1.01701	-1.29184	-0.875317	0.578056	-0.749597
	-1.008	0.626022	2.89721	0.075881	0.258466	0.572932	-0.14398	0.66305	-0.118919	0.396448	0.433015	-0.298301	0.273242	-1.18518	1.53005	-0.351287	-0.21993	-2.87818	0.833395	-0.233971	-1.6481	0.583611	0.721552	-0.213937	-0.18097			-1.586	-0.486091	-1.31473	1.03976	-0.673746	1.23942	-0.115612	0.255772	1.68223	0.720258	-1.55841	-4.18812	0.158636	-0.380395	-0.507665	-0.612346	-0.163449	-0.881388	-1.21689	-0.954455	0.67153	-0.658843
	-0.984	0.692287	2.86914	0.0804004	0.234302	0.702803	-0.17871	0.595385	-0.145886	0.434986	0.0783193	-0.218384	0.237483	-1.17542	1.42347	-0.425111	-0.26377	-2.89879	0.775245	-0.268563	-1.65524	0.539973	0.692656	-0.126578	-0.19146			-1.5616	-0.403304	-1.43372	0.983486	-0.643445	1.29471	-0.111971	0.0995391	1.68598	0.591437	-1.6115	-4.29382	0.0451781	-0.223731	-0.427995	-0.722225	-0.161076	-0.726626	-1.10979	-1.03074	0.680338	-0.577997
	-0.96	0.742748	2.8453	0.048973	0.21991	0.833261	-0.197213	0.544552	-0.199749	0.466401	-0.239219	-0.109986	0.204241	-1.17101	1.33782	-0.482631	-0.30119	-2.91471	0.690102	-0.332766	-1.70065	0.446996	0.661804	-0.0626808	-0.19552			-1.5372	-0.297746	-1.54724	0.918961	-0.570534	1.36376	-0.106725	-0.00972478	1.64593	0.437173	-1.66445	-4.39199	-0.0790064	-0.0603775	-0.363349	-0.785855	-0.153931	-0.562549	-0.988966	-1.11282	0.601748	-0.524116
	-0.936	0.772306	2.8244	-0.00838357	0.214686	0.963151	-0.201205	0.513343	-0.288644	0.499605	-0.520449	0.0166355	0.173396	-1.1758	1.27289	-0.505445	-0.32288	-2.92738	0.579152	-0.419733	-1.77637	0.327093	0.629572	-0.0411103	-0.19172			-1.5128	-0.175964	-1.65446	0.850162	-0.46423	1.43777	-0.105386	-0.0553341	1.56647	0.258561	-1.70522	-4.50079	-0.210003	0.104568	-0.319515	-0.796889	-0.141179	-0.407327	-0.865614	-1.20544	0.450619	-0.502147
	-0.912	0.781169	2.80372	-0.0851008	0.21191	1.10119	-0.196178	0.499242	-0.404511	0.54541	-0.760702	0.155219	0.146698	-1.19092	1.22702	-0.492384	-0.32157	-2.93909	0.445782	-0.517318	-1.85397	0.207879	0.598202	-0.0642661	-0.1825			-1.4884	-0.0467337	-1.75247	0.779399	-0.345822	1.49746	-0.112111	-0.0310932	1.45885	0.0655785	-1.72672	-4.63097	-0.343627	0.267134	-0.299833	-0.760436	-0.123603	-0.278451	-0.736293	-1.3066	0.24964	-0.502254
	-0.888	0.771454	2.77911	-0.179683	0.203397	1.25454	-0.190232	0.492469	-0.528141	0.614576	-0.959709	0.302248	0.128678	-1.21362	1.19591	-0.460955	-0.29401	-2.95294	0.295089	-0.609798	-1.90387	0.108356	0.570024	-0.113663	-0.17163			-1.464	0.0788618	-1.83533	0.706429	-0.237469	1.52775	-0.129429	0.0542	1.33809	-0.126901	-1.73508	-4.79029	-0.475643	0.424588	-0.305486	-0.691124	-0.103905	-0.185773	-0.591704	-1.40856	0.0260382	-0.509915
	-0.864	0.745469	2.74461	-0.292973	0.1843	1.41822	-0.191352	0.480078	-0.637837	0.712014	-1.12075	0.452389	0.125891	-1.2384	1.17212	-0.433941	-0.24062	-2.97017	0.13327	-0.682485	-1.9176	0.0329745	0.545932	-0.164332	-0.16279			-1.4396	0.188581	-1.89814	0.629607	-0.153061	1.5266	-0.1587	0.181018	1.21923	-0.29968	-1.73337	-4.98268	-0.604648	0.574861	-0.335199	-0.605149	-0.0850237	-0.131644	-0.42965	-1.50133	-0.18818	-0.517718
	-0.84	0.702641	2.69445	-0.423843	0.153722	1.57579	-0.205121	0.446309	-0.714246	0.828661	-1.24039	0.595343	0.144346	-1.26042	1.14635	-0.421297	-0.16324	-2.98937	-0.0328947	-0.727015	-1.91343	-0.0255245	0.524684	-0.206753	-0.15849			-1.4152	0.272065	-1.94289	0.548269	-0.0991596	1.49707	-0.200256	0.329997	1.11332	-0.431944	-1.70944	-5.20194	-0.73436	0.715273	-0.38453	-0.517907	-0.0690801	-0.111512	-0.254664	-1.57663	-0.364859	-0.527941
	-0.816	0.638117	2.6254	-0.566903	0.114983	1.71437	-0.233831	0.385229	-0.741444	0.942044	-1.31413	0.717941	0.186824	-1.27761	1.10996	-0.422032	-0.06365	-3.0082	-0.196665	-0.744313	-1.91563	-0.083242	0.503041	-0.245106	-0.15896			-1.3908	0.323773	-1.98021	0.464087	-0.0786122	1.44305	-0.253328	0.48538	1.02621	-0.508756	-1.65682	-5.42831	-0.871008	0.84155	-0.445926	-0.443538	-0.0571989	-0.113695	-0.0689275	-1.63012	-0.490232	-0.54498
	-0.792	0.545612	2.53603	-0.714061	0.0758926	1.83504	-0.276281	0.319119	-0.70755	1.0302	-1.35522	0.810296	0.252099	-1.29046	1.05733	-0.434538	0.055198	-3.02418	-0.350899	-0.742984	-1.93683	-0.160086	0.477179	-0.2834	-0.16322			-1.3664	0.343288	-2.02388	0.380646	-0.0889135	1.36915	-0.315831	0.636402	0.961522	-0.526617	-1.59511	-5.63405	-1.01638	0.947453	-0.510366	-0.392251	-0.0497235	-0.12443	0.126506	-1.66093	-0.566028	-0.568073
	-0.768	0.421592	2.42494	-0.858405	0.046961	1.94574	-0.328653	0.279569	-0.605108	1.08966	-1.39473	0.870964	0.336671	-1.30112	0.986886	-0.454482	0.186259	-3.03458	-0.487344	-0.733402	-1.98108	-0.269392	0.44448	-0.325225	-0.17322			-1.342	0.333219	-2.08311	0.302208	-0.120943	1.2734	-0.38441	0.776273	0.923648	-0.493293	-1.5501	-5.79554	-1.16341	1.02484	-0.569764	-0.366451	-0.0466055	-0.135077	0.318322	-1.67034	-0.601865	-0.592646
	-0.744	0.267583	2.29163	-0.996626	0.0384392	2.05278	-0.386475	0.270824	-0.431543	1.13576	-1.45798	0.906006	0.436929	-1.3114	0.901212	-0.470092	0.317686	-3.03635	-0.59836	-0.721877	-2.04924	-0.408967	0.404129	-0.379481	-0.19549			-1.3176	0.296881	-2.15911	0.232231	-0.163007	1.14732	-0.45521	0.89385	0.917111	-0.421179	-1.52651	-5.90406	-1.29877	1.06546	-0.61839	-0.359477	-0.0472894	-0.144006	0.48009	-1.66094	-0.606866	-0.614903
	-0.72	0.0897211	2.13963	-1.12808	0.0552635	2.15978	-0.445593	0.266434	-0.190674	1.18433	-1.54831	0.921502	0.549336	-1.31984	0.805564	-0.470001	0.435663	-3.02553	-0.679599	-0.709759	-2.12879	-0.559893	0.356841	-0.454344	-0.23584			-1.2932	0.237183	-2.24565	0.172205	-0.205935	0.989817	-0.524675	0.974333	0.94371	-0.324154	-1.51029	-5.96778	-1.40867	1.0647	-0.653208	-0.359553	-0.0508577	-0.153618	0.588898	-1.63633	-0.590012	-0.631923
	-0.696	-0.104319	1.97801	-1.25189	0.0930637	2.26517	-0.501537	0.23191	0.105781	1.23695	-1.65122	0.917626	0.669282	-1.32079	0.704825	-0.453834	0.528923	-2.99701	-0.730824	-0.697206	-2.18555	-0.695881	0.304653	-0.54396	-0.29307			-1.2688	0.156877	-2.33246	0.121785	-0.244922	0.817118	-0.589745	1.00869	1.00067	-0.222203	-1.48397	-6.00315	-1.48247	1.02374	-0.673518	-0.355197	-0.0566429	-0.167369	0.635646	-1.60127	-0.564286	-0.639709
	-0.672	-0.309729	1.82031	-1.36498	0.141609	2.35861	-0.549547	0.151703	0.438358	1.28046	-1.74236	0.891577	0.790359	-1.30708	0.601786	-0.429392	0.592521	-2.94619	-0.755214	-0.687353	-2.18052	-0.795454	0.250606	-0.626453	-0.35893			-1.2444	0.0599478	-2.41006	0.079921	-0.279172	0.656051	-0.647343	0.991725	1.08116	-0.139442	-1.43846	-6.02303	-1.51391	0.9478	-0.679838	-0.338218	-0.0638746	-0.187345	0.623138	-1.56143	-0.541632	-0.635625
	-0.648	-0.527282	1.6818	-1.46296	0.193884	2.42489	-0.586187	0.0425961	0.783005	1.29644	-1.79249	0.845168	0.904662	-1.27372	0.498068	-0.403594	0.627986	-2.87117	-0.7583	-0.6873	-2.09313	-0.84784	0.197861	-0.673976	-0.42368			-1.22	-0.0472866	-2.473	0.0459451	-0.311219	0.526244	-0.693328	0.918928	1.17632	-0.0962494	-1.37885	-6.02811	-1.50165	0.843231	-0.672836	-0.308002	-0.0709268	-0.209842	0.563079	-1.52189	-0.526792	-0.622371
	-0.624	-0.761644	1.57624	-1.54314	0.249773	2.45517	-0.610234	-0.0678281	1.1166	1.27007	-1.78124	0.789117	1.00428	-1.21862	0.395762	-0.379585	0.639587	-2.77403	-0.747241	-0.704725	-1.92751	-0.857682	0.148561	-0.664775	-0.48215			-1.1956	-0.157596	-2.52097	0.0202718	-0.343016	0.433782	-0.722134	0.79373	1.27687	-0.105273	-1.31825	-6.00355	-1.44962	0.717508	-0.652854	-0.277796	-0.0754082	-0.223284	0.474131	-1.48533	-0.521045	-0.604904
	-0.6	-1.01557	1.51454	-1.60634	0.309179	2.45503	-0.621744	-0.16749	1.41978	1.19475	-1.71631	0.741187	1.0832	-1.14073	0.298431	-0.356662	0.630796	-2.66019	-0.729623	-0.742545	-1.71211	-0.845305	0.103417	-0.590361	-0.5346			-1.1712	-0.266433	-2.55802	0.00443737	-0.369819	0.383941	-0.728122	0.628571	1.3733	-0.165052	-1.26872	-5.92676	-1.36605	0.581137	-0.619821	-0.269065	-0.0745303	-0.214439	0.376971	-1.45161	-0.525372	-0.583216
	-0.576	-1.28375	1.50493	-1.65608	0.366704	2.44144	-0.620992	-0.251559	1.67439	1.0735	-1.62765	0.719408	1.13819	-1.03972	0.211453	-0.332246	0.603933	-2.53688	-0.710706	-0.796319	-1.49255	-0.833511	0.0621479	-0.454563	-0.58223			-1.1468	-0.373935	-2.58898	0.000347586	-0.380843	0.388533	-0.708117	0.436021	1.45665	-0.254569	-1.23696	-5.78445	-1.26115	0.447808	-0.573846	-0.295212	-0.0655925	-0.17655	0.287034	-1.41858	-0.536077	-0.550859
	-0.552	-1.55074	1.55137	-1.69646	0.417143	2.43226	-0.608124	-0.309887	1.86054	0.916247	-1.53308	0.73472	1.16828	-0.917535	0.140964	-0.30692	0.561857	-2.4117	-0.691692	-0.856161	-1.30918	-0.834138	0.0236791	-0.272402	-0.62379			-1.1224	-0.482751	-2.61573	0.00920233	-0.367681	0.455101	-0.663331	0.227424	1.52142	-0.341473	-1.219	-5.5816	-1.14455	0.331376	-0.516633	-0.357653	-0.046899	-0.111883	0.21131	-1.38443	-0.544824	-0.500861
	-0.528	-1.79465	1.65077	-1.73069	0.463052	2.43796	-0.5828	-0.341341	1.95972	0.736146	-1.4205	0.787931	1.17407	-0.778432	0.0921479	-0.286155	0.509171	-2.2909	-0.670728	-0.911482	-1.17927	-0.848617	-0.0142549	-0.0687153	-0.65503			-1.098	-0.593992	-2.63744	0.0304399	-0.3304	0.576432	-0.599245	0.0243597	1.56796	-0.396575	-1.20033	-5.33506	-1.0235	0.241493	-0.452293	-0.452785	-0.018441	-0.0321717	0.148136	-1.35048	-0.545958	-0.432394
	-0.504	-1.99408	1.79239	-1.76082	0.514818	2.45928	-0.544058	-0.363924	1.96247	0.54528	-1.2676	0.872788	1.15807	-0.626619	0.0689335	-0.277292	0.452182	-2.17816	-0.643613	-0.955924	-1.09736	-0.875031	-0.0550479	0.127208	-0.67002			-1.0736	-0.705515	-2.65358	0.0612663	-0.273545	0.737105	-0.524207	-0.138001	1.60188	-0.398777	-1.17006	-5.06263	-0.902815	0.18108	-0.386392	-0.571267	0.0183888	0.0426276	0.0886309	-1.32172	-0.541591	-0.351696
	-0.48	-2.13353	1.9592	-1.7888	0.584824	2.4883	-0.491526	-0.396952	1.87355	0.349311	-1.06059	0.982607	1.12472	-0.465397	0.074179	-0.284775	0.398067	-2.07565	-0.603869	-0.989659	-1.04362	-0.909777	-0.102115	0.283801	-0.6638			-1.0492	-0.813627	-2.66511	0.0974513	-0.197382	0.926698	-0.44824	-0.227836	1.63114	-0.338274	-1.13189	-4.77855	-0.78637	0.147732	-0.324462	-0.694458	0.0613686	0.0921336	0.0249836	-1.3041	-0.542877	-0.270088
	-0.456	-2.20461	2.13043	-1.81747	0.68241	2.51276	-0.427791	-0.446942	1.71081	0.14785	-0.787002	1.11396	1.07931	-0.299627	0.108411	-0.307228	0.353253	-1.98636	-0.544984	-1.01704	-0.994819	-0.945911	-0.15761	0.372846	-0.63518			-1.0248	-0.915323	-2.67273	0.134909	-0.095671	1.14268	-0.381481	-0.229747	1.66331	-0.226997	-1.09915	-4.49616	-0.67805	0.137322	-0.271266	-0.801256	0.10702	0.104622	-0.0423804	-1.30124	-0.566461	-0.200919
	-0.432	-2.20563	2.28611	-1.85019	0.811597	2.52172	-0.35965	-0.516457	1.5009	-0.0576276	-0.438604	1.26391	1.02693	-0.137269	0.168769	-0.338313	0.321397	-1.91449	-0.462375	-1.04114	-0.934755	-0.976495	-0.221862	0.381699	-0.58837			-1.0004	-1.00843	-2.67458	0.170839	0.0393935	1.38581	-0.331778	-0.139224	1.70396	-0.0931374	-1.08388	-4.23221	-0.581027	0.145864	-0.23055	-0.880648	0.150416	0.0779823	-0.109016	-1.31298	-0.625924	-0.152989
	-0.408	-2.1417	2.41062	-1.88934	0.969108	2.50442	-0.296565	-0.610905	1.27408	-0.259405	-0.0365805	1.4246	0.971675	0.0129009	0.250235	-0.367816	0.302544	-1.86365	-0.352297	-1.06002	-0.856058	-0.999184	-0.293695	0.316009	-0.53145			-0.976	-1.09094	-2.66638	0.20387	0.209908	1.64759	-0.303409	0.0386912	1.75606	0.039604	-1.08955	-4.00934	-0.497241	0.169197	-0.205111	-0.936824	0.186789	0.0140334	-0.170982	-1.33561	-0.725024	-0.127716
	-0.384	-2.02384	2.49191	-1.93494	1.14546	2.44887	-0.247016	-0.733613	1.0576	-0.450709	0.368987	1.58062	0.915825	0.144796	0.347066	-0.383222	0.294464	-1.83517	-0.211306	-1.06832	-0.754826	-1.01486	-0.371293	0.194599	-0.47216			-0.9516	-1.16182	-2.64356	0.233654	0.407622	1.89691	-0.297985	0.277828	1.81975	0.15394	-1.1151	-3.854	-0.428591	0.202985	-0.196389	-0.985033	0.213206	-0.0855765	-0.220251	-1.36321	-0.857774	-0.121974
	-0.36	-1.86581	2.52161	-1.98446	1.33186	2.34963	-0.215056	-0.880616	0.870204	-0.632967	0.723524	1.71166	0.859725	0.256449	0.452514	-0.37762	0.294445	-1.82856	-0.0381697	-1.06251	-0.6337	-1.02396	-0.452943	0.0475582	-0.41351			-0.9272	-1.22262	-2.6037	0.260596	0.617812	2.09057	-0.315889	0.532346	1.89283	0.232675	-1.16395	-3.78711	-0.378779	0.242854	-0.203157	-1.04553	0.228866	-0.217685	-0.247194	-1.38947	-1.01659	-0.128464
	-0.336	-1.68086	2.49912	-2.03396	1.52408	2.21473	-0.19945	-1.03455	0.720589	-0.807195	0.974469	1.80057	0.803108	0.348814	0.558502	-0.357469	0.299273	-1.84344	0.164184	-1.04565	-0.513807	-1.02654	-0.537266	-0.0910813	-0.35103			-0.9028	-1.27694	-2.54769	0.285719	0.82771	2.19638	-0.356462	0.757706	1.97149	0.268411	-1.23684	-3.81325	-0.353387	0.283491	-0.220768	-1.13566	0.234437	-0.374102	-0.255869	-1.40925	-1.2008	-0.1373
	-0.312	-1.48078	2.43339	-2.08012	1.71745	2.06345	-0.195546	-1.1632	0.608228	-0.960502	1.08029	1.84136	0.746843	0.423989	0.656985	-0.337758	0.304447	-1.87969	0.388265	-1.02703	-0.42776	-1.0241	-0.622602	-0.203165	-0.27687			-0.8784	-1.32806	-2.47916	0.310329	1.02927	2.2047	-0.416922	0.92508	2.05081	0.268978	-1.31729	-3.91789	-0.357433	0.318441	-0.242472	-1.25841	0.231003	-0.542626	-0.265981	-1.41899	-1.41346	-0.143584
	-0.288	-1.27605	2.34067	-2.12091	1.90044	1.92072	-0.197815	-1.23721	0.525386	-1.07296	1.03854	1.83922	0.69341	0.484645	0.742577	-0.330823	0.304703	-1.93523	0.623538	-1.01687	-0.390065	-1.01995	-0.706088	-0.297938	-0.19015			-0.854	-1.37761	-2.40338	0.335385	1.21578	2.12904	-0.491702	1.01967	2.12517	0.245947	-1.37486	-4.07448	-0.392638	0.342055	-0.261921	-1.39759	0.219364	-0.711585	-0.295713	-1.41667	-1.64981	-0.149594
	-0.264	-1.07526	2.24105	-2.15467	2.05382	1.81033	-0.201515	-1.25294	0.46041	-1.13622	0.8865	1.80636	0.64595	0.533958	0.814052	-0.340463	0.295793	-2.00495	0.859139	-1.01996	-0.384544	-1.01957	-0.784277	-0.397263	-0.1012			-0.8296	-1.42644	-2.32668	0.360553	1.3789	2.00024	-0.573739	1.04201	2.18916	0.209128	-1.38086	-4.25539	-0.456538	0.352208	-0.274915	-1.52634	0.199726	-0.872795	-0.353356	-1.40177	-1.89105	-0.156347
	-0.24	-0.884567	2.15449	-2.17897	2.15834	1.74509	-0.20384	-1.23207	0.401395	-1.15729	0.666854	1.75809	0.607257	0.574933	0.872874	-0.363797	0.276634	-2.08288	1.08654	-1.03342	-0.387196	-1.03012	-0.854924	-0.516767	-0.02548			-0.8052	-1.47526	-2.25479	0.383371	1.5087	1.85671	-0.656619	1.01605	2.23919	0.171652	-1.31597	-4.43732	-0.542842	0.35159	-0.280134	-1.61914	0.171959	-1.0225	-0.444556	-1.37444	-2.11016	-0.158032
	-0.216	-0.708742	2.09645	-2.19114	2.20595	1.71957	-0.204864	-1.20372	0.339418	-1.14912	0.415399	1.70684	0.579647	0.609164	0.920132	-0.39553	0.25054	-2.16516	1.30117	-1.05019	-0.389741	-1.05698	-0.917591	-0.660978	0.024442			-0.7808	-1.52316	-2.19046	0.399842	1.59549	1.72862	-0.735205	0.981447	2.2751	0.141574	-1.17472	-4.59778	-0.642213	0.345632	-0.27906	-1.6585	0.136736	-1.16217	-0.577258	-1.33453	-2.28473	-0.148362
	-0.192	-0.552967	2.07412	-2.18975	2.20172	1.71252	-0.207409	-1.1906	0.270226	-1.12346	0.176562	1.65817	0.564826	0.636499	0.954617	-0.427892	0.223626	-2.25084	1.50169	-1.06432	-0.393286	-1.0962	-0.972825	-0.823367	0.043815			-0.7564	-1.56661	-2.13319	0.406759	1.63295	1.62301	-0.805079	0.969956	2.29981	0.107829	-0.975701	-4.71083	-0.743712	0.337964	-0.274368	-1.63583	0.0965869	-1.29842	-0.758812	-1.28137	-2.40115	-0.130637
	-0.168	-0.423304	2.08289	-2.17559	2.15623	1.70026	-0.215133	-1.19885	0.193071	-1.09096	-0.00467944	1.61302	0.562759	0.657151	0.973372	-0.452044	0.200832	-2.33934	1.68707	-1.07312	-0.395497	-1.12945	-1.02115	-0.992076	0.037322			-0.732	-1.60135	-2.08064	0.403841	1.62362	1.52813	-0.862534	0.990596	2.31711	0.0547574	-0.760061	-4.75215	-0.837051	0.328022	-0.268426	-1.55193	0.0558592	-1.44147	-0.989524	-1.21402	-2.44847	-0.116843
	-0.144	-0.325539	2.10574	-2.15182	2.08015	1.67138	-0.230231	-1.21355	0.107886	-1.06345	-0.109762	1.57198	0.570583	0.674119	0.973493	-0.463499	0.183126	-2.42843	1.85396	-1.0761	-0.397716	-1.13462	-1.06231	-1.15717	0.017756			-0.7076	-1.62525	-2.02938	0.394249	1.58426	1.43228	-0.904991	1.03155	2.32935	-0.00994379	-0.572932	-4.70884	-0.914873	0.31304	-0.263864	-1.41806	0.0198108	-1.60335	-1.25638	-1.13149	-2.4189	-0.115974
	-0.12	-0.263635	2.12058	-2.12358	1.98431	1.63144	-0.252549	-1.20873	0.0135261	-1.05025	-0.151021	1.53859	0.583537	0.692562	0.953259	-0.463478	0.168004	-2.51558	1.99746	-1.07236	-0.410171	-1.10358	-1.09503	-1.30711	0.000591			-0.6832	-1.63983	-1.97495	0.383435	1.54179	1.33636	-0.930919	1.06659	2.33662	-0.0590683	-0.445332	-4.58122	-0.974042	0.291578	-0.264421	-1.25268	-0.00647865	-1.79638	-1.53216	-1.03323	-2.31934	-0.128527
	-0.096	-0.23865	2.11176	-2.09652	1.88081	1.59655	-0.280165	-1.16394	-0.0918021	-1.04981	-0.160608	1.52039	0.597917	0.717138	0.9123	-0.458381	0.152185	-2.60042	2.11402	-1.05872	-0.435395	-1.04573	-1.11791	-1.42524	-0.00394			-0.6588	-1.64987	-1.91236	0.376736	1.52005	1.25359	-0.939787	1.0602	2.33739	-0.0736912	-0.385285	-4.37775	-1.01627	0.265145	-0.27425	-1.07477	-0.0191995	-2.02995	-1.7819	-0.91896	-2.17765	-0.149762
	-0.072	-0.247855	2.07677	-2.07459	1.78295	1.58257	-0.3106	-1.07421	-0.208556	-1.04812	-0.174271	1.52668	0.613281	0.750893	0.851869	-0.458735	0.13407	-2.68493	2.20329	-1.03074	-0.454418	-0.977473	-1.13098	-1.49461	0.005516			-0.6344	-1.66191	-1.83715	0.376963	1.53138	1.2009	-0.932494	0.980321	2.33019	-0.0577275	-0.380835	-4.113	-1.04803	0.237261	-0.296631	-0.90081	-0.0168269	-2.30429	-1.9733	-0.787452	-2.03238	-0.171753
	-0.048	-0.283577	2.02347	-2.05857	1.70289	1.59538	-0.341822	-0.951759	-0.334275	-1.02694	-0.201176	1.56413	0.631741	0.79567	0.775855	-0.470751	0.113981	-2.77177	2.26933	-0.985756	-0.434656	-0.908907	-1.13667	-1.50258	0.024412			-0.61	-1.68316	-1.74689	0.383743	1.57725	1.18922	-0.911631	0.815323	2.31453	-0.0308916	-0.409635	-3.80691	-1.07853	0.211489	-0.333432	-0.74731	-0.000794661	-2.60351	-2.08738	-0.635821	-1.9178	-0.18786
	-0.024	-0.333551	1.96168	-2.04669	1.64742	1.62594	-0.372177	-0.820454	-0.464384	-0.973518	-0.214554	1.6339	0.655912	0.851846	0.691497	-0.488293	0.092857	-2.86242	2.32084	-0.925042	-0.347441	-0.838321	-1.13875	-1.44868	0.047485			-0.5856	-1.72213	-1.64237	0.394975	1.65118	1.21878	-0.881187	0.58351	2.29086	-0.00974424	-0.445264	-3.48111	-1.1162	0.189836	-0.384949	-0.631419	0.0249792	-2.89227	-2.12798	-0.459498	-1.85477	-0.199172
	0	-0.384135	1.89805	-2.03686	1.61511	1.65771	-0.399633	-0.707818	-0.59449	-0.887699	-0.187207	1.73322	0.687718	0.917841	0.608231	-0.498343	0.071645	-2.95583	2.36798	-0.853749	-0.187081	-0.761156	-1.14041	-1.35303	0.071304			-0.5612	-1.78953	-1.52659	0.409321	1.7406	1.28109	-0.845566	0.330584	2.26026	0.00452198	-0.467757	-3.15923	-1.16567	0.172229	-0.449683	-0.560781	0.0559331	-3.121	-2.1213	-0.251674	-1.84405	-0.212342
	0.024	-0.424177	1.83764	-2.02858	1.60111	1.67837	-0.421449	-0.643052	-0.72201	-0.782349	-0.120837	1.8584	0.727872	0.990013	0.535624	-0.495452	0.051679	-3.04815	2.41763	-0.779055	0.0177863	-0.682241	-1.14379	-1.24526	0.092898			-0.5368	-1.8972	-1.40117	0.42761	1.82848	1.36331	-0.80855	0.109244	2.22451	0.0197735	-0.479291	-2.87232	-1.22607	0.157406	-0.525274	-0.521061	0.0881233	-3.23983	-2.10119	-0.00169635	-1.86822	-0.233454
	0.048	-0.447519	1.78548	-2.02303	1.60685	1.67717	-0.434231	-0.652407	-0.846319	-0.67107	-0.0355995	2.00522	0.775257	1.0624	0.481773	-0.490767	0.034753	-3.13358	2.47004	-0.707694	0.217117	-0.615812	-1.15053	-1.14611	0.109132			-0.5124	-2.05516	-1.26463	0.451401	1.89687	1.44896	-0.773621	-0.0497078	2.1866	0.0388747	-0.500962	-2.65762	-1.29128	0.144641	-0.609734	-0.483242	0.118207	-3.21414	-2.09359	0.306279	-1.90375	-0.26738
	0.072	-0.453164	1.7439	-2.02148	1.64376	1.63968	-0.434252	-0.739023	-0.967326	-0.559251	0.0516904	2.16677	0.826605	1.12688	0.451579	-0.503888	0.022894	-3.20565	2.51832	-0.64388	0.372464	-0.57624	-1.16239	-1.06775	0.118961			-0.488	-2.26828	-1.11485	0.479898	1.93125	1.51705	-0.745097	-0.144315	2.15124	0.0532817	-0.548905	-2.54599	-1.35194	0.135047	-0.700269	-0.43284	0.143701	-3.03327	-2.10772	0.692346	-1.92975	-0.316362
	0.096	-0.442571	1.70984	-2.0234	1.72838	1.55869	-0.418823	-0.871781	-1.0842	-0.450371	0.133747	2.33151	0.877111	1.17467	0.446216	-0.543671	0.018833	-3.25901	2.55215	-0.588916	0.481996	-0.573254	-1.18114	-1.02271	0.124749			-0.4636	-2.53268	-0.951563	0.508771	1.92189	1.54702	-0.728086	-0.182534	2.12417	0.0498864	-0.621961	-2.55071	-1.39886	0.131523	-0.791238	-0.385434	0.163456	-2.70866	-2.13391	1.17569	-1.93288	-0.374008
	0.12	-0.416732	1.67626	-2.02531	1.87123	1.44382	-0.38813	-1.00283	-1.19617	-0.351208	0.207819	2.48523	0.922031	1.19904	0.465144	-0.602694	0.02643	-3.2911	2.56366	-0.542639	0.57585	-0.614441	-1.20781	-1.02395	0.130747			-0.4392	-2.83265	-0.776985	0.532338	1.8647	1.52911	-0.727149	-0.170417	2.10896	0.0185857	-0.710723	-2.66888	-1.42706	0.137517	-0.874882	-0.363292	0.177525	-2.26699	-2.14869	1.76431	-1.91137	-0.425869
	0.144	-0.375702	1.63485	-2.02213	2.06548	1.31593	-0.345855	-1.09068	-1.3039	-0.270608	0.271593	2.61485	0.958587	1.19798	0.507785	-0.670119	0.049387	-3.30246	2.55078	-0.505067	0.694776	-0.705179	-1.24172	-1.07722	0.139506			-0.4148	-3.14185	-0.595595	0.54707	1.76548	1.46816	-0.744852	-0.118198	2.10365	-0.0454569	-0.805211	-2.88947	-1.43782	0.156075	-0.943939	-0.366357	0.186849	-1.74603	-2.12449	2.4428	-1.87026	-0.457211
	0.168	-0.320869	1.57809	-2.01049	2.28925	1.20002	-0.298126	-1.11402	-1.40957	-0.217596	0.318268	2.70751	0.986423	1.17513	0.573091	-0.741018	0.08864	-3.29597	2.51804	-0.476999	0.872676	-0.837541	-1.28082	-1.17014	0.149163			-0.3904	-3.43007	-0.4143	0.553477	1.64193	1.37529	-0.780894	-0.0405361	2.09993	-0.132518	-0.893461	-3.19672	-1.43635	0.189891	-0.993123	-0.378297	0.193005	-1.19223	-2.0433	3.16737	-1.8139	-0.459526
	0.192	-0.258616	1.50302	-1.99091	2.51943	1.12012	-0.250808	-1.07848	-1.51549	-0.195779	0.336433	2.7493	1.00607	1.13835	0.659472	-0.813723	0.141068	-3.27534	2.47586	-0.459575	1.11666	-0.977019	-1.32285	-1.27276	0.154834			-0.366	-3.67178	-0.242134	0.554884	1.51884	1.26124	-0.832045	0.0515168	2.08617	-0.213637	-0.962991	-3.56848	-1.42655	0.241619	-1.01893	-0.388413	0.197793	-0.654685	-1.90802	3.87551	-1.74849	-0.436862
	0.216	-0.201071	1.41439	-1.96668	2.73964	1.09135	-0.206587	-1.01148	-1.62226	-0.198308	0.319366	2.73001	1.01752	1.09744	0.766114	-0.884144	0.200764	-3.24364	2.43666	-0.452547	1.38941	-1.07247	-1.36604	-1.36155	0.153552			-0.3416	-3.85009	-0.0872182	0.554248	1.42142	1.14021	-0.893079	0.149824	2.05237	-0.258093	-1.00815	-3.97524	-1.40756	0.313836	-1.01902	-0.392256	0.202425	-0.175982	-1.74186	4.50585	-1.68724	-0.406522
	0.24	-0.161377	1.32298	-1.94071	2.93694	1.11731	-0.164878	-0.945499	-1.72824	-0.208447	0.272708	2.64818	1.02012	1.06124	0.893552	-0.941594	0.260957	-3.20348	2.4095	-0.452238	1.62411	-1.08841	-1.40878	-1.43928	0.148651			-0.3172	-3.95516	0.0471955	0.551993	1.37022	1.03033	-0.958375	0.245966	1.99354	-0.252715	-1.03448	-4.38407	-1.37465	0.4084	-0.992167	-0.382682	0.20607	0.215128	-1.57689	5.01573	-1.64521	-0.389267
	0.264	-0.148688	1.24016	-1.91303	3.09525	1.1925	-0.124169	-0.8965	-1.83144	-0.205656	0.213546	2.51306	1.01287	1.03479	1.04334	-0.971505	0.315299	-3.15792	2.39767	-0.45201	1.76729	-1.02343	-1.44866	-1.52089	0.148654			-0.2928	-3.98126	0.162423	0.546707	1.37777	0.940779	-1.02302	0.334026	1.91052	-0.204368	-1.05218	-4.76646	-1.32356	0.525324	-0.938474	-0.355885	0.204623	0.505887	-1.43986	5.38858	-1.62805	-0.400513
	0.288	-0.167971	1.17291	-1.88047	3.19512	1.29889	-0.0837711	-0.850345	-1.93194	-0.174253	0.155833	2.34196	0.995059	1.01907	1.21755	-0.967345	0.359142	-3.11005	2.39945	-0.444524	1.80387	-0.900839	-1.4819	-1.60818	0.161002			-0.2684	-3.92672	0.260137	0.537802	1.44551	0.863031	-1.08297	0.405514	1.80929	-0.134848	-1.06686	-5.10332	-1.25528	0.661989	-0.860064	-0.316705	0.191952	0.69823	-1.34379	5.63125	-1.62488	-0.448157
	0.312	-0.221621	1.12202	-1.8388	3.22263	1.40378	-0.0444356	-0.778697	-2.03259	-0.108806	0.0937296	2.15123	0.967648	1.01319	1.41642	-0.936415	0.390756	-3.06197	2.41017	-0.422054	1.74863	-0.751785	-1.50475	-1.6856	0.186829			-0.244	-3.79584	0.339409	0.527702	1.56104	0.782425	-1.13526	0.437003	1.69905	-0.0716826	-1.08317	-5.38443	-1.17741	0.812771	-0.761836	-0.269128	0.163714	0.803701	-1.29097	5.76547	-1.61149	-0.531035
	0.336	-0.310049	1.08309	-1.78608	3.17861	1.4701	-0.00839377	-0.675261	-2.13714	-0.0183601	0.00153042	1.95097	0.933759	1.01557	1.63495	-0.889953	0.411166	-3.01442	2.42382	-0.374747	1.63282	-0.604519	-1.51641	-1.73585	0.221057			-0.2196	-3.60054	0.397481	0.521654	1.70064	0.694798	-1.17825	0.398376	1.58942	-0.0347326	-1.11871	-5.60573	-1.10246	0.969285	-0.651249	-0.212842	0.120432	0.836638	-1.27961	5.81756	-1.56373	-0.637581
	0.36	-0.433122	1.05069	-1.72506	3.07907	1.4736	0.0212993	-0.567838	-2.24702	0.0752777	-0.149619	1.75162	0.89729	1.02379	1.86186	-0.833752	0.422596	-2.96633	2.43353	-0.289505	1.49501	-0.481485	-1.5203	-1.75505	0.255657			-0.1952	-3.36205	0.431204	0.52495	1.83634	0.607844	-1.21183	0.281498	1.48933	-0.0315041	-1.20241	-5.76913	-1.04434	1.12207	-0.536869	-0.152758	0.067334	0.813365	-1.30339	5.81027	-1.46925	-0.750433
	0.384	-0.591294	1.02462	-1.66332	2.94984	1.4157	0.0417891	-0.493876	-2.35886	0.15362	-0.367877	1.56853	0.860858	1.03531	2.08117	-0.770982	0.427471	-2.91432	2.43244	-0.151114	1.36219	-0.399743	-1.52198	-1.75162	0.282438			-0.1708	-3.11078	0.436838	0.539195	1.94103	0.530917	-1.23797	0.109112	1.40749	-0.0638307	-1.34888	-5.88508	-1.0143	1.26304	-0.426909	-0.101995	0.0115026	0.755176	-1.34939	5.75939	-1.33276	-0.855405
	0.408	-0.783322	1.01054	-1.61073	2.82194	1.32222	0.0514858	-0.471983	-2.46552	0.214769	-0.625877	1.41372	0.824777	1.0483	2.27587	-0.705695	0.428027	-2.85458	2.41499	0.0535447	1.2379	-0.365236	-1.52654	-1.73477	0.295943			-0.1464	-2.88068	0.411567	0.560306	1.99305	0.469938	-1.26087	-0.0860123	1.35112	-0.130372	-1.54397	-5.9726	-1.01727	1.38713	-0.328496	-0.0721323	-0.0416836	0.685345	-1.40546	5.67429	-1.17632	-0.943728
	0.432	-1.00324	1.01292	-1.57531	2.72563	1.22424	0.0507026	-0.494694	-2.56029	0.267153	-0.864684	1.28753	0.787609	1.06129	2.43216	-0.642534	0.424737	-2.78641	2.37821	0.329139	1.11641	-0.366764	-1.53765	-1.70742	0.296089			-0.122	-2.70111	0.357526	0.580164	1.98017	0.429223	-1.28522	-0.280531	1.32233	-0.218908	-1.75895	-6.05575	-1.04996	1.49163	-0.247253	-0.064231	-0.0903424	0.621398	-1.46692	5.56075	-1.03122	-1.00908
	0.456	-1.24059	1.02936	-1.56056	2.68297	1.14085	0.0416176	-0.543063	-2.64029	0.315149	-1.0187	1.18021	0.74775	1.07293	2.54241	-0.586049	0.41504	-2.71413	2.32249	0.666959	1.00195	-0.382535	-1.55726	-1.66692	0.287353			-0.0976	-2.59206	0.284214	0.590927	1.89956	0.407133	-1.31444	-0.463259	1.31684	-0.308294	-1.96519	-6.15978	-1.10323	1.57408	-0.186537	-0.0723825	-0.13522	0.571786	-1.53138	5.42385	-0.926427	-1.05023
	0.48	-1.48203	1.05007	-1.56583	2.70336	1.08136	0.0278647	-0.602346	-2.70642	0.351964	-1.05113	1.07951	0.704798	1.08229	2.60609	-0.53403	0.394887	-2.64576	2.25147	1.04423	0.907311	-0.395796	-1.58496	-1.6118	0.275274			-0.0732	-2.56283	0.206037	0.588391	1.7576	0.391268	-1.35063	-0.630851	1.32751	-0.387441	-2.13802	-6.30682	-1.16778	1.63176	-0.146296	-0.0942687	-0.177528	0.538658	-1.59481	5.26869	-0.877098	-1.07409
	0.504	-1.71089	1.06	-1.58867	2.78217	1.05299	0.0134317	-0.654342	-2.7606	0.363375	-0.974651	0.976859	0.659903	1.08882	2.62931	-0.473156	0.361593	-2.58899	2.17155	1.42785	0.841033	-0.406705	-1.61787	-1.54752	0.263961			-0.0488	-2.61135	0.13473	0.571775	1.57201	0.365427	-1.39514	-0.785823	1.34972	-0.462916	-2.26318	-6.50999	-1.23827	1.66305	-0.122226	-0.134884	-0.217365	0.520111	-1.65446	5.09896	-0.878743	-1.09449
	0.528	-1.90677	1.04375	-1.6269	2.90492	1.06131	0.00093165	-0.664282	-2.80298	0.338523	-0.842283	0.868654	0.615269	1.09233	2.6232	-0.38963	0.315444	-2.54816	2.09059	1.78158	0.805227	-0.426486	-1.65171	-1.48323	0.255904			-0.0244	-2.72384	0.0735077	0.541212	1.37064	0.321221	-1.44833	-0.932411	1.38426	-0.545464	-2.34289	-6.76757	-1.31386	1.66798	-0.106689	-0.19861	-0.253992	0.509206	-1.70661	4.91571	-0.916054	-1.1294
	0.552	-2.04984	0.989849	-1.67874	3.05668	1.10417	-0.00943926	-0.598026	-2.83187	0.277734	-0.711422	0.756833	0.573374	1.09286	2.60152	-0.28544	0.259868	-2.52432	2.01651	2.0752	0.799554	-0.456726	-1.68214	-1.42581	0.252549			0	-2.87584	0.0197807	0.495941	1.18206	0.265537	-1.50849	-1.06827	1.43517	-0.63701	-2.38964	-7.0619	-1.39731	1.64792	-0.0920912	-0.280384	-0.287081	0.493333	-1.74238	4.71778	-0.977014	-1.19073
	0.576	-2.12795	0.891681	-1.74131	3.22541	1.16412	-0.019509	-0.45206	-2.84663	0.192246	-0.610174	0.647712	0.536076	1.09033	2.57773	-0.183496	0.20087	-2.51545	1.95781	2.29225	0.815681	-0.483699	-1.70478	-1.37749	0.252597			0.0244	-3.03665	-0.0294941	0.434327	1.02485	0.214037	-1.57142	-1.18352	1.50382	-0.729137	-2.40996	-7.368	-1.49327	1.60466	-0.0744248	-0.368072	-0.317071	0.457543	-1.7517	4.5037	-1.05942	-1.27273
	0.6	-2.14137	0.749384	-1.80882	3.39594	1.21421	-0.0316448	-0.258907	-2.85038	0.0992872	-0.536594	0.544738	0.504196	1.08447	2.56195	-0.112415	0.145815	-2.51641	1.92308	2.43207	0.833919	-0.498	-1.71448	-1.33622	0.249459			0.0488	-3.17697	-0.0773137	0.35519	0.905118	0.173692	-1.6316	-1.27131	1.58463	-0.808555	-2.39372	-7.66468	-1.60511	1.53919	-0.0540035	-0.448219	-0.344695	0.391963	-1.7295	4.27401	-1.16846	-1.3542
	0.624	-2.10367	0.572961	-1.87274	3.54869	1.23408	-0.0468771	-0.0668644	-2.84945	0.0165424	-0.472232	0.444132	0.478496	1.0752	2.55859	-0.0825899	0.101294	-2.52114	1.91757	2.50463	0.834561	-0.506849	-1.70581	-1.30329	0.233782			0.0732	-3.27658	-0.127402	0.259647	0.820566	0.14172	-1.68432	-1.34133	1.66577	-0.858331	-2.32105	-7.93714	-1.73234	1.45141	-0.0336399	-0.50762	-0.370283	0.296619	-1.67774	4.03261	-1.30791	-1.41145
	0.648	-2.03827	0.380526	-1.92483	3.66751	1.21586	-0.0638498	0.0868383	-2.84973	-0.0405483	-0.38873	0.340946	0.461199	1.06273	2.56573	-0.0805517	0.070981	-2.52583	1.93963	2.52304	0.810183	-0.522655	-1.67506	-1.28899	0.199933			0.0976	-3.32766	-0.182825	0.15228	0.764289	0.11811	-1.72691	-1.41802	1.7336	-0.854716	-2.18231	-8.17342	-1.87134	1.34144	-0.0168811	-0.537125	-0.392941	0.179479	-1.60254	3.7864	-1.4703	-1.43119
	0.672	-1.97012	0.191967	-1.96103	3.74444	1.1617	-0.0793397	0.187025	-2.85295	-0.0630712	-0.262822	0.236201	0.456022	1.04801	2.57659	-0.0851654	0.055018	-2.52976	1.98006	2.49992	0.764915	-0.551645	-1.62177	-1.30279	0.14929			0.122	-3.33259	-0.245692	0.0404611	0.72846	0.106234	-1.75904	-1.51944	1.77738	-0.777241	-1.99086	-8.3648	-2.0181	1.21094	-0.00787824	-0.53655	-0.410629	0.0535347	-1.50752	3.54294	-1.63507	-1.41508
	0.696	-1.91923	0.0258149	-1.98379	3.77606	1.08394	-0.0895081	0.234717	-2.85626	-0.0583035	-0.0927754	0.137312	0.466553	1.03349	2.58229	-0.0827395	0.051002	-2.534	2.02543	2.44645	0.704056	-0.592505	-1.54898	-1.34298	0.088524			0.1464	-3.29944	-0.317856	-0.0677565	0.707294	0.107056	-1.78285	-1.64185	1.79151	-0.6304	-1.77316	-8.50927	-2.16883	1.06407	-0.0116872	-0.512688	-0.421793	-0.0638182	-1.39087	3.30826	-1.77982	-1.37275
	0.72	-1.90053	-0.100077	-2.00096	3.7597	1.00066	-0.0909049	0.24338	-2.85552	-0.0498711	0.100439	0.0535546	0.494477	1.02227	2.57423	-0.0692692	0.055538	-2.54005	2.06364	2.37198	0.63153	-0.636289	-1.46263	-1.40015	0.026255			0.1708	-3.23837	-0.399939	-0.165548	0.698091	0.116769	-1.80295	-1.76057	1.77502	-0.449876	-1.55215	-8.61187	-2.31768	0.90744	-0.0333939	-0.472396	-0.426894	-0.152645	-1.25363	3.08651	-1.89168	-1.31312
	0.744	-1.92366	-0.170783	-2.02147	3.69592	0.928353	-0.0813618	0.231113	-2.84913	-0.0618965	0.28399	-0.00991045	0.538949	1.01518	2.54576	-0.0476482	0.065642	-2.54885	2.08727	2.2841	0.556315	-0.67181	-1.37058	-1.46486	-0.02962			0.1952	-3.15914	-0.490548	-0.247881	0.702007	0.127674	-1.82552	-1.84042	1.72964	-0.285401	-1.34247	-8.68179	-2.45453	0.747763	-0.0760595	-0.420503	-0.428122	-0.19443	-1.11062	2.87981	-1.96525	-1.24232
	0.768	-1.98896	-0.178265	-2.05051	3.5938	0.878678	-0.0610239	0.201977	-2.83889	-0.106689	0.43929	-0.0537334	0.597509	1.00964	2.49272	-0.0277554	0.079289	-2.55876	2.09408	2.18873	0.489674	-0.693451	-1.28155	-1.52872	-0.07455			0.2196	-3.06952	-0.586975	-0.311019	0.721854	0.137032	-1.85641	-1.85601	1.65837	-0.178873	-1.15448	-8.72653	-2.56553	0.590192	-0.138329	-0.359259	-0.428404	-0.176354	-0.988344	2.68848	-1.99588	-1.16586
	0.792	-2.08479	-0.122657	-2.08791	3.46868	0.853905	-0.0328306	0.141538	-2.82755	-0.183007	0.579825	-0.0801244	0.667619	1.00183	2.41385	-0.0255432	0.094885	-2.56468	2.0872	2.08959	0.437647	-0.701082	-1.204	-1.58514	-0.10955			0.244	-2.97528	-0.686044	-0.352224	0.755545	0.156066	-1.89856	-1.80329	1.56514	-0.151257	-1.00061	-8.747	-2.63558	0.440328	-0.213587	-0.283581	-0.431276	-0.0951384	-0.912372	2.5126	-1.98048	-1.09119
	0.816	-2.18998	-0.0119515	-2.12954	3.3314	0.846374	-0.00197905	0.0393661	-2.81493	-0.274146	0.734604	-0.0909096	0.747482	0.989083	2.31143	-0.0536065	0.110492	-2.56079	2.07462	1.98829	0.401651	-0.697859	-1.14498	-1.63468	-0.13985			0.2684	-2.88132	-0.784639	-0.370353	0.793341	0.201897	-1.9503	-1.68825	1.45544	-0.197571	-0.891808	-8.73914	-2.65167	0.305979	-0.291695	-0.182905	-0.440654	0.0410495	-0.898682	2.35359	-1.92171	-1.02483
	0.84	-2.2794	0.139595	-2.16954	3.18234	0.843428	0.0249217	-0.0921325	-2.79547	-0.349456	0.92408	-0.0897613	0.835446	0.97045	2.19243	-0.111563	0.123738	-2.5441	2.06638	1.88536	0.384888	-0.68972	-1.10916	-1.68398	-0.17118			0.2928	-2.79359	-0.878756	-0.366969	0.824402	0.279137	-2.00548	-1.5191	1.33603	-0.290956	-0.825187	-8.70003	-2.60695	0.195324	-0.362353	-0.048724	-0.459529	0.214319	-0.95364	2.21344	-1.82864	-0.964387
	0.864	-2.3311	0.314485	-2.20175	3.01721	0.830605	0.0409251	-0.232365	-2.75977	-0.375898	1.15053	-0.0811908	0.928776	0.946588	2.06896	-0.188447	0.132426	-2.51561	2.07149	1.78074	0.39414	-0.68154	-1.0978	-1.73919	-0.20774			0.3172	-2.72085	-0.962182	-0.347153	0.845925	0.378253	-2.05529	-1.31598	1.21311	-0.397141	-0.78506	-8.63502	-2.50268	0.114471	-0.418806	0.127074	-0.488528	0.401652	-1.07786	2.09365	-1.71407	-0.898945
	0.888	-2.33194	0.494967	-2.22023	2.83538	0.797071	0.0407666	-0.371205	-2.69991	-0.331372	1.39337	-0.0683599	1.02359	0.919837	1.95624	-0.27115	0.135436	-2.4805	2.09746	1.67339	0.426591	-0.671428	-1.10848	-1.79972	-0.25106			0.3416	-2.67452	-1.02807	-0.319122	0.866195	0.489068	-2.08948	-1.11578	1.08991	-0.484942	-0.758622	-8.56125	-2.34642	0.0670675	-0.460058	0.356068	-0.525247	0.578418	-1.26645	1.99584	-1.59001	-0.81746
	0.912	-2.27881	0.665808	-2.21892	2.64439	0.738211	0.0228789	-0.499113	-2.61571	-0.211307	1.61222	-0.0538352	1.11607	0.892952	1.86883	-0.350211	0.1339	-2.44755	2.14952	1.56222	0.457579	-0.651814	-1.13628	-1.85103	-0.29826			0.366	-2.66527	-1.0717	-0.292538	0.899554	0.60189	-2.09562	-0.953879	0.965742	-0.527089	-0.746834	-8.50039	-2.14923	0.0549946	-0.490137	0.641659	-0.564098	0.716815	-1.50239	1.92215	-1.4656	-0.709648
	0.936	-2.17693	0.817025	-2.192	2.45966	0.654808	-0.0101934	-0.596398	-2.51907	-0.028281	1.7656	-0.0391365	1.20363	0.866509	1.8163	-0.422873	0.131399	-2.42574	2.22717	1.44819	0.452146	-0.619911	-1.17574	-1.86101	-0.34192			0.3904	-2.6977	-1.09079	-0.276935	0.960136	0.699169	-2.05808	-0.836645	0.836784	-0.507549	-0.764527	-8.46616	-1.92242	0.0798734	-0.514911	0.962619	-0.595639	0.783923	-1.75163	1.874	-1.35148	-0.5597
	0.96	-2.03825	0.944561	-2.13549	2.29873	0.558525	-0.0526959	-0.634814	-2.43214	0.191746	1.83374	-0.0229987	1.28546	0.837935	1.79958	-0.491004	0.131658	-2.42024	2.32261	1.33496	0.387969	-0.584953	-1.22199	-1.78718	-0.37317			0.4148	-2.76535	-1.08415	-0.281989	1.0612	0.76195	-1.95893	-0.736986	0.698003	-0.432196	-0.835879	-8.46051	-1.67159	0.145885	-0.538257	1.27552	-0.604791	0.747914	-1.96894	1.85093	-1.2594	-0.349184
	0.984	-1.87957	1.04769	-2.04931	2.17328	0.469462	-0.0970317	-0.57629	-2.37608	0.414166	1.83023	-0.00203875	1.36205	0.802828	1.81012	-0.553699	0.135752	-2.43198	2.42372	1.22746	0.267825	-0.56255	-1.27055	-1.59426	-0.38632			0.4392	-2.84686	-1.04949	-0.31917	1.21639	0.785818	-1.78081	-0.612682	0.54481	-0.322451	-0.986204	-8.47631	-1.39129	0.260927	-0.559567	1.53464	-0.569567	0.591093	-2.10949	1.85069	-1.18937	-0.0736772
	1.008	-1.71987	1.12651	-1.93762	2.08591	0.400621	-0.135259	-0.383463	-2.35889	0.605891	1.79075	0.0268325	1.43375	0.757172	1.8333	-0.602941	0.141693	-2.46015	2.51789	1.12879	0.119252	-0.562366	-1.31691	-1.27053	-0.38136			0.4636	-2.90386	-0.980758	-0.4025	1.43978	0.780379	-1.5106	-0.419299	0.373664	-0.197549	-1.22884	-8.4967	-1.06492	0.43358	-0.573223	1.71607	-0.464687	0.320455	-2.13691	1.8701	-1.11908	0.237642
	1.032	-1.57702	1.18196	-1.80721	2.03428	0.348924	-0.160383	-0.0480752	-2.37319	0.749647	1.74578	0.0642585	1.49927	0.699894	1.85384	-0.625687	0.146067	-2.50403	2.59387	1.03779	-0.0195044	-0.5791	-1.35709	-0.830582	-0.36319			0.488	-2.88412	-0.869864	-0.546205	1.74363	0.756477	-1.14407	-0.113688	0.182753	-0.0661555	-1.55205	-8.49334	-0.668906	0.66901	-0.568726	1.83531	-0.269975	-0.030797	-2.03263	1.90475	-1.00939	0.516586
	1.056	-1.46295	1.21533	-1.66567	2.01622	0.301283	-0.167609	0.390607	-2.40215	0.846473	1.70381	0.107937	1.55526	0.634158	1.86018	-0.608774	0.146089	-2.56222	2.64294	0.950404	-0.124239	-0.594231	-1.38823	-0.306216	-0.33843			0.5124	-2.73279	-0.716773	-0.758398	2.12398	0.729329	-0.690809	0.337185	-0.0259291	0.0695976	-1.9139	-8.43252	-0.176451	0.965937	-0.529996	1.94287	0.0270715	-0.407716	-1.80911	1.9485	-0.821405	0.691499
	1.08	-1.37988	1.22514	-1.52063	2.02935	0.25123	-0.155374	0.86037	-2.42858	0.90312	1.65443	0.154465	1.59751	0.565603	1.84631	-0.545413	0.14049	-2.63112	2.66065	0.865643	-0.196134	-0.591583	-1.40837	0.259978	-0.3117			0.5368	-2.40963	-0.539992	-1.0328	2.53725	0.731967	-0.176577	0.944072	-0.242904	0.203898	-2.24987	-8.29006	0.439119	1.31316	-0.435465	2.09725	0.437058	-0.740328	-1.50658	1.99584	-0.534363	0.752746
	1.104	-1.32226	1.20614	-1.38045	2.06999	0.208051	-0.125471	1.28986	-2.4433	0.922077	1.5806	0.201041	1.62276	0.499188	1.81079	-0.440738	0.129015	-2.70535	2.64727	0.790246	-0.246642	-0.573762	-1.41623	0.812789	-0.28483			0.5612	-1.90779	-0.372314	-1.34272	2.89894	0.807833	0.359149	1.69712	-0.447067	0.321913	-2.49491	-8.06372	1.19543	1.6882	-0.261913	2.33836	0.968279	-0.955584	-1.16822	2.04582	-0.154201	0.771115
	1.128	-1.28271	1.15455	-1.25541	2.13692	0.184793	-0.0822779	1.62749	-2.44478	0.904411	1.46325	0.246187	1.63037	0.437961	1.75512	-0.312196	0.112731	-2.77978	2.60653	0.736763	-0.279162	-0.560317	-1.41158	1.29373	-0.26047			0.5856	-1.27112	-0.239627	-1.64224	3.12409	0.986714	0.871034	2.573	-0.605532	0.416714	-2.61684	-7.77482	2.08755	2.06189	0.00945129	2.68045	1.61609	-0.989125	-0.819545	2.10193	0.293311	0.838698
	1.152	-1.25565	1.07461	-1.15798	2.23182	0.18647	-0.0316545	1.84544	-2.43036	0.855625	1.2763	0.290464	1.62285	0.384063	1.68371	-0.184019	0.095353	-2.85079	2.54518	0.71717	-0.289132	-0.572342	-1.39594	1.66672	-0.24425			0.61	-0.594333	-0.137929	-1.87767	3.17962	1.27325	1.31818	3.53083	-0.68226	0.515412	-2.63256	-7.46353	3.08178	2.4069	0.388944	3.11804	2.3564	-0.788957	-0.465123	2.16926	0.776399	1.0067
	1.176	-1.23698	0.980207	-1.10095	2.35169	0.215802	0.0198954	1.94233	-2.39047	0.78283	0.99293	0.335374	1.60487	0.340213	1.60522	-0.0781212	0.082798	-2.91674	2.47188	0.737052	-0.273723	-0.619939	-1.37234	1.92945	-0.24145			0.6344	0.0233937	-0.0294799	-2.00225	3.09538	1.64957	1.67113	4.5143	-0.650168	0.673812	-2.58197	-7.18536	4.12082	2.70557	0.877414	3.62971	3.15099	-0.322118	-0.0991993	2.25462	1.26645	1.27755
	1.2	-1.22283	0.890841	-1.09456	2.48612	0.276127	0.0656108	1.93745	-2.31296	0.688679	0.605565	0.381894	1.58132	0.31075	1.53218	-0.00653368	0.08045	-2.97826	2.39406	0.793515	-0.234681	-0.6966	-1.34412	2.0986	-0.25287			0.6588	0.549532	0.135125	-1.98433	2.92962	2.08298	1.91417	5.46906	-0.497396	0.939245	-2.49136	-7.00107	5.13549	2.95476	1.46656	4.17893	3.95974	0.408939	0.276999	2.36556	1.74252	1.62485
	1.224	-1.20942	0.823593	-1.14386	2.62219	0.360128	0.0992375	1.85905	-2.19123	0.573289	0.138037	0.431185	1.55578	0.302185	1.47908	0.0316544	0.090555	-3.03828	2.3169	0.87763	-0.175129	-0.780381	-1.31405	2.19331	-0.27378			0.6832	1.03084	0.387862	-1.81142	2.7335	2.54102	2.04707	6.35442	-0.229148	1.32465	-2.36515	-6.95343	6.07014	3.16629	2.13891	4.72094	4.7512	1.35973	0.648525	2.50373	2.18952	2.00196
	1.248	-1.19389	0.783715	-1.24637	2.74832	0.445842	0.117057	1.73961	-2.028	0.442336	-0.354443	0.485349	1.52966	0.323365	1.46044	0.0471652	0.111466	-3.10129	2.24456	0.979797	-0.10066	-0.841962	-1.28397	2.23611	-0.29582			0.7076	1.53438	0.729632	-1.49379	2.53928	2.99929	2.08876	7.14392	0.131263	1.81265	-2.19378	-7.04754	6.91771	3.36057	2.86737	5.21962	5.50563	2.46062	0.997592	2.66029	2.58933	2.34217
	1.272	-1.17485	0.761735	-1.39004	2.8574	0.511709	0.119809	1.61858	-1.83297	0.30978	-0.798332	0.546052	1.50269	0.38412	1.48795	0.051448	0.13898	-3.1726	2.1792	1.09441	-0.0213901	-0.859687	-1.25442	2.25815	-0.31078			0.732	2.09624	1.13672	-1.06211	2.36293	3.42894	2.07655	7.82278	0.545051	2.36904	-1.96001	-7.2499	7.72319	3.55334	3.61672	5.66232	6.21194	3.64163	1.31714	2.82075	2.91947	2.57742
	1.296	-1.1513	0.741954	-1.55304	2.94888	0.553095	0.111895	1.53256	-1.61804	0.189522	-1.13501	0.613025	1.47399	0.491301	1.5668	0.0520466	0.168375	-3.25763	2.11965	1.21962	0.0559148	-0.833647	-1.22428	2.28769	-0.31364			0.7564	2.71667	1.57658	-0.5586	2.20769	3.78738	2.05347	8.38272	0.966451	2.95222	-1.6505	-7.50045	8.54135	3.746	4.34872	6.05541	6.86379	4.84214	1.61325	2.97336	3.1674	2.67793
	1.32	-1.11959	0.713019	-1.70508	3.0261	0.582898	0.0981831	1.49102	-1.39503	0.0879756	-1.35146	0.685061	1.44249	0.644018	1.69377	0.0575051	0.195243	-3.36051	2.06364	1.35229	0.136461	-0.782229	-1.19071	2.33466	-0.30273			0.7808	3.37482	2.01865	-0.0295897	2.06928	4.03846	2.05176	8.81821	1.35498	3.52538	-1.26841	-7.73005	9.39392	3.9281	5.02777	6.40773	7.45702	6.00537	1.89802	3.11294	3.34252	2.67208
	1.344	-1.07217	0.670587	-1.80912	3.09027	0.620098	0.0814401	1.47391	-1.17741	0.00767881	-1.47547	0.761221	1.40676	0.83109	1.85753	0.0792039	0.215746	-3.48136	2.01068	1.48425	0.228237	-0.725119	-1.14983	2.3901	-0.27912			0.8052	4.04141	2.43714	0.479414	1.9483	4.1845	2.08708	9.12761	1.68687	4.06591	-0.830895	-7.87982	10.2601	4.08603	5.62363	6.72161	7.98882	7.07642	2.18038	3.23969	3.46761	2.62005
	1.368	-1.00096	0.614782	-1.82715	3.13594	0.676723	0.0625692	1.45698	-0.980877	-0.0475241	-1.5406	0.838515	1.36513	1.03268	2.04072	0.122455	0.228407	-3.61317	1.96224	1.60337	0.325943	-0.674485	-1.09826	2.43798	-0.24652			0.8296	4.68839	2.81229	0.931181	1.85794	4.26795	2.16328	9.31428	1.95862	4.56275	-0.358312	-7.91589	11.0952	4.20867	6.11223	6.99201	8.45783	8.01317	2.4612	3.3562	3.56436	2.57397
	1.392	-0.90193	0.548157	-1.73265	3.15508	0.750315	0.0426728	1.42746	-0.81898	-0.0735183	-1.56537	0.909229	1.31606	1.22708	2.22376	0.178541	0.23646	-3.74036	1.92121	1.6981	0.41396	-0.640101	-1.03456	2.47229	-0.21039			0.854	5.29539	3.13093	1.30476	1.81627	4.33772	2.2785	9.38663	2.17624	5.01606	0.12742	-7.83406	11.8603	4.29018	6.47703	7.20988	8.86409	8.7989	2.73858	3.46534	3.65119	2.56293
	1.416	-0.777004	0.476212	-1.51963	3.14675	0.826443	0.0242067	1.38127	-0.697184	-0.0679762	-1.5638	0.963781	1.25851	1.39988	2.3886	0.22914	0.247088	-3.84112	1.89154	1.76212	0.483743	-0.636152	-0.959447	2.50439	-0.1764			0.8784	5.84985	3.38393	1.5969	1.83489	4.42092	2.42665	9.35865	2.34014	5.44089	0.599736	-7.65698	12.5411	4.33222	6.71152	7.37083	9.20868	9.44308	3.0119	3.56961	3.74127	2.59662
	1.44	-0.632847	0.407753	-1.20244	3.11928	0.887884	0.0102551	1.32406	-0.611224	-0.0307256	-1.55568	0.996688	1.19278	1.54859	2.52077	0.258224	0.26689	-3.89346	1.87626	1.79692	0.541683	-0.67616	-0.875147	2.55388	-0.14902			0.9028	6.34228	3.56613	1.81788	1.91824	4.51937	2.5971	9.24945	2.44352	5.86243	1.03472	-7.42937	13.1403	4.34347	6.82093	7.48186	9.49307	9.97004	3.2747	3.67233	3.83844	2.66883
	1.464	-0.4774	0.352076	-0.812314	3.08267	0.923737	0.0032962	1.2727	-0.550394	0.0323631	-1.56122	1.00878	1.12124	1.67921	2.61048	0.260234	0.297686	-3.88215	1.87653	1.80982	0.603209	-0.759135	-0.78483	2.63723	-0.13035			0.9272	6.76333	3.68164	1.98703	2.06789	4.61551	2.77662	9.08349	2.48088	6.30272	1.42329	-7.20575	13.6613	4.33611	6.82101	7.5584	9.71897	10.4026	3.51179	3.77928	3.94415	2.75974
																												0.9516	7.10577	3.74676	2.12881	2.28161	4.68322	2.95272	8.88764	2.4537	6.76412	1.77055	-7.02971	14.1015	4.32133	6.73449	7.61284	9.88877	10.7535	3.70622	3.8985	4.06524	2.84658
																												0.976	7.36786	3.78465	2.26789	2.55173	4.70277	3.11574	8.68376	2.3715	7.22581	2.08097	-6.92124	14.457	4.3061	6.58781	7.64749	10.0061	11.0328	3.84438	4.0368	4.20792	2.92143
																												1.0004	7.55439	3.81577	2.42414	2.86469	4.66825	3.25779	8.48785	2.25043	7.6639	2.34602	-6.87739	14.726	4.29414	6.40843	7.66152	10.0757	11.2564	3.91908	4.19553	4.36956	2.9969
																												1.0248	7.67551	3.8518	2.6084	3.19675	4.58464	3.36982	8.31264	2.10939	8.07083	2.54907	-6.87903	14.9094	4.2888	6.22155	7.65905	10.1017	11.4421	3.93326	4.36954	4.53531	3.09199
																												1.0492	7.74364	3.89594	2.81931	3.512	4.46131	3.44113	8.16451	1.96584	8.44579	2.68018	-6.90171	15.0112	4.29383	6.04617	7.64788	10.0868	11.6024	3.89531	4.55007	4.67911	3.2186
																												1.0736	7.76872	3.94676	3.04381	3.77085	4.31049	3.46255	8.04049	1.83448	8.77239	2.74237	-6.92377	15.042	4.31174	5.8927	7.63551	10.0336	11.7443	3.80675	4.72926	4.77692	3.38135
																												1.098	7.75508	4.00249	3.2621	3.94349	4.15143	3.42972	7.92912	1.72811	9.0217	2.7505	-6.92957	15.02	4.3423	5.76345	7.62431	9.9464	11.8719	3.66423	4.90348	4.82375	3.57969
																												1.1224	7.70365	4.06317	3.45503	4.01815	4.00833	3.34488	7.81634	1.65789	9.17882	2.73292	-6.91336	14.9666	4.38275	5.65474	7.60788	9.83187	11.9902	3.47702	5.07377	4.83278	3.80423
																												1.1468	7.61758	4.12929	3.60987	3.99822	3.89938	3.21713	7.69107	1.63139	9.25592	2.72398	-6.87976	14.8987	4.42943	5.55909	7.57814	9.69699	12.108	3.27245	5.24347	4.82013	4.03277
																												1.1712	7.50481	4.19985	3.72213	3.89263	3.8316	3.06043	7.5433	1.65028	9.27575	2.73905	-6.83594	14.8253	4.47807	5.46717	7.53422	9.54739	12.237	3.08141	5.4151	4.79762	4.23636
																												1.1956	7.37569	4.27265	3.79377	3.71274	3.80582	2.88987	7.36451	1.71031	9.25083	2.76096	-6.78519	14.7489	4.52297	5.36925	7.48082	9.38575	12.3855	2.92288	5.58885	4.77577	4.39521
																												1.22	7.23914	4.3462	3.82998	3.47901	3.82098	2.71835	7.15671	1.80497	9.18192	2.75889	-6.72902	14.667	4.55769	5.2572	7.42328	9.21193	12.5532	2.80267	5.76364	4.7651	4.5076
																												1.2444	7.10067	4.42006	3.83649	3.22318	3.87126	2.55483	6.93797	1.92977	9.07122	2.72218	-6.67132	14.5735	4.57787	5.12672	7.36268	9.02568	12.7278	2.72145	5.939	4.77316	4.58608
																												1.2688	6.96253	4.4934	3.81821	2.97918	3.93923	2.40409	6.73596	2.08312	8.93602	2.67029	-6.6177	14.4621	4.58407	4.97816	7.29474	8.82983	12.8898	2.6789	6.11566	4.79705	4.64916
																												1.2932	6.82504	4.56616	3.77882	2.77137	3.99418	2.26744	6.57755	2.26357	8.80758	2.62511	-6.57012	14.3274	4.58175	4.81566	7.21799	8.63037	13.0213	2.67113	6.29528	4.82138	4.71006
																												1.3176	6.68841	4.64123	3.72109	2.60998	3.9994	2.14361	6.4804	2.46636	8.71333	2.58509	-6.52359	14.1669	4.57767	4.64525	7.13829	8.43304	13.1106	2.6883	6.4793	4.83112	4.76933
																												1.342	6.55419	4.7207	3.64728	2.49403	3.92445	2.03003	6.44688	2.68199	8.66277	2.53216	-6.47135	13.9807	4.57623	4.47257	7.06073	8.23989	13.1498	2.71481	6.66629	4.82088	4.82156
																												1.3664	6.42561	4.79915	3.55917	2.41571	3.75904	1.92439	6.46688	2.89731	8.64743	2.45178	-6.41304	13.7712	4.57907	4.30262	6.98083	8.04944	13.1343	2.73181	6.84971	4.78847	4.86703
																												1.3908	6.30666	4.8627	3.4583	2.36418	3.5213	1.82566	6.523	3.09824	8.64544	2.3438	-6.35429	13.5407	4.58731	4.14125	6.88378	7.85993	13.0653	2.72325	7.01885	4.73061	4.91048
																												1.4152	6.20035	4.89476	3.34631	2.33101	3.25246	1.73393	6.58686	3.27214	8.62852	2.22122	-6.30015	13.2913	4.60276	3.9958	6.75288	7.67259	12.9505	2.68307	7.16177	4.64758	4.9479
																												1.4396	6.10767	4.88345	3.22486	2.31367	2.99606	1.64927	6.62387	3.40906	8.57474	2.1041	-6.24993	13.0288	4.62646	3.8737	6.58246	7.49173	12.7979	2.61618	7.26776	4.54335	4.96578
																												1.464	6.02787	4.8262	3.09522	2.3115	2.77522	1.5713	6.6164	3.50279	8.47835	2.01424	-6.19597	12.7669	4.65709	3.77987	6.38167	7.32215	12.6093	2.53363	7.32927	4.41845	4.95796
																												1.4884	5.96016	4.72846	2.95799	2.3198	2.58915	1.49933	6.57495	3.5514	8.34903	1.96658	-6.12792	12.5259	4.69113	3.71363	6.16709	7.16631	12.3829	2.44947	7.34354	4.2615	4.9295
																												1.5128	5.90592	4.59895	2.81364	2.33189	2.42544	1.43183	6.51761	3.55679	8.20385	1.96291	-6.04126	12.323	4.72352	3.66786	5.9553	7.02366	12.1172	2.37671	7.3129	4.0526	4.88202
																												1.5372	5.86909	4.44518	2.66356	2.34535	2.26986	1.36645	6.44573	3.524	8.06381	1.99555	-5.94371	12.1657	4.74789	3.63171	5.75786	6.89177	11.8145	2.32096	7.2436	3.78335	4.8075
																												1.5616	5.85366	4.27185	2.51064	2.36143	2.11129	1.30135	6.34504	3.4613	7.95255	2.05356	-5.85229	12.053	4.75741	3.59516	5.57851	6.76775	11.4844	2.27995	7.14366	3.46793	4.69559
																												1.586	5.86062	4.0835	2.35897	2.38109	1.94897	1.23625	6.2059	3.38096	7.88364	2.12187	-5.78436	11.9786	4.74687	3.55202	5.41517	6.64897	11.1463	2.24728	7.02062	3.13373	4.54163
																												1.6104	5.88649	3.88762	2.21301	2.40525	1.80108	1.17235	6.03911	3.29963	7.84956	2.17714	-5.75182	11.9338	4.71515	3.49945	5.26529	6.5324	10.8283	2.21406	6.88059	2.81401	4.35317
																												1.6348	5.92351	3.69356	2.07651	2.43541	1.69941	1.11127	5.86972	3.23719	7.82706	2.19753	-5.76061	11.9094	4.66604	3.43555	5.13057	6.41387	10.565	2.17313	6.72929	2.54733	4.15127
																												1.6592	5.96145	3.50923	1.95169	2.47037	1.66699	1.05316	5.71874	3.21376	7.78738	2.18313	-5.81386	11.9004	4.60605	3.35808	5.01408	6.28866	10.3947	2.12558	6.57331	2.36869	3.9626
																												1.6836	5.99017	3.3394	1.84002	2.50477	1.70295	0.99555	5.59227	3.24566	7.70371	2.15728	-5.9162	11.9052	4.54181	3.26557	4.91321	6.15331	10.3515	2.08241	6.41952	2.29722	3.81038
																												1.708	6.0014	3.18641	1.74389	2.53343	1.78265	0.934569	5.48107	3.3414	7.55956	2.13819	-6.07263	11.923	4.47911	3.15975	4.81915	6.00711	10.4533	2.06084	6.27376	2.33218	3.70886
																												1.7324	5.98937	3.05201	1.66733	2.5525	1.86281	0.867449	5.36854	3.49977	7.35526	2.11432	-6.2804	11.9514	4.42283	3.04632	4.72142	5.85246	10.6934	2.07584	6.13993	2.45625	3.6588
																												1.7568	5.95106	2.93802	1.61566	2.55532	1.89989	0.793895	5.24262	3.71125	7.10719	2.0578	-6.52398	11.9872	4.37702	2.93376	4.61191	5.69411	11.043	2.12756	6.01925	2.64762	3.6484
																												1.7812	5.88593	2.84605	1.59444	2.533	1.87688	0.716493	5.1022	3.9617	6.84143	1.95482	-6.77772	12.0289	4.34536	2.83112	4.48672	5.53774	11.4632	2.19839	5.90967	2.8936	3.66187
																												1.8056	5.79537	2.7757	1.60736	2.47946	1.80864	0.640401	4.95724	4.23719	6.58615	1.81094	-7.01089	12.0756	4.33099	2.74615	4.34694	5.38867	11.9185	2.26674	5.80808	3.18932	3.68803
																												1.83	5.68209	2.72314	1.65456	2.39569	1.72366	0.571559	4.82391	4.52814	6.36702	1.63788	-7.19572	12.1246	4.33608	2.68375	4.20082	5.25092	12.3835	2.32017	5.71357	3.52878	3.72326
																												1.8544	5.54978	2.68303	1.73294	2.29188	1.64654	0.514137	4.71407	4.83064	6.20596	1.44835	-7.31751	12.1701	4.36169	2.64445	4.06177	5.12702	12.8387	2.35735	5.62816	3.90166	3.7712
																												1.8788	5.40337	2.65142	1.83761	2.18393	1.5928	0.469759	4.62814	5.14429	6.11277	1.26039	-7.37815	12.2044	4.40809	2.62396	3.9419	5.01848	13.2635	2.38715	5.55486	4.29413	3.84259
																												1.9032	5.24993	2.62566	1.96225	2.08709	1.56839	0.438824	4.55458	5.46795	6.07448	1.10125	-7.39223	12.2194	4.4753	2.61411	3.84986	4.92669	13.6366	2.42307	5.49575	4.69283	3.9517
																												1.9276	5.0987	2.6022	2.09825	2.01179	1.5674	0.421949	4.46909	5.79503	6.06603	1.00515	-7.37987	12.2086	4.5631	2.60427	3.79123	4.85292	13.9432	2.47188	5.4514	5.09171	4.10596
																												1.952	4.95932	2.57678	2.23368	1.96198	1.57662	0.420622	4.34332	6.11014	6.07271	0.999583	-7.358	12.1708	4.66996	2.5839	3.76767	4.79777	14.1755	2.52955	5.42121	5.49291	4.29825
																												1.9764	4.83873	2.54647	2.35404	1.93709	1.58464	0.436951	4.16329	6.39013	6.09136	1.08469	-7.33383	12.112	4.79236	2.54575	3.77496	4.76071	14.3276	2.58396	5.40416	5.89992	4.51397
																												2.0008	4.7386	2.51052	2.44587	1.93748	1.58124	0.472568	3.93048	6.60971	6.12064	1.22911	-7.30467	12.0436	4.92601	2.48747	3.7993	4.74011	14.3946	2.61639	5.40029	6.3105	4.74275
																												2.0252	4.65512	2.47056	2.5014	1.96703	1.55464	0.527657	3.64942	6.74878	6.16338	1.38956	-7.26504	11.9729	5.06726	2.41056	3.82031	4.73371	14.3797	2.60805	5.41253	6.71358	4.97554
																												2.0496	4.58184	2.43063	2.5212	2.02794	1.5022	0.600262	3.32691	6.7974	6.22896	1.53629	-7.2155	11.8979	5.21314	2.31849	3.82229	4.73873	14.2968	2.55065	5.44696	7.095	5.19578
																												2.074	4.51419	2.39565	2.51409	2.11303	1.44163	0.686168	2.97955	6.757	6.33022	1.66411	-7.16485	11.808	5.3598	2.21582	3.80076	4.75206	14.1631	2.44798	5.51082	7.44366	5.381
																												2.0984	4.45178	2.36977	2.49469	2.20451	1.40023	0.780744	2.63582	6.63816	6.4867	1.77832	-7.12486	11.6915	5.50172	2.10816	3.76178	4.77026	13.987	2.30836	5.60957	7.74521	5.50808
																												2.1228	4.39647	2.35522	2.47974	2.28041	1.39376	0.881757	2.32658	6.45788	6.72586	1.87605	-7.10278	11.5404	5.63339	2.00179	3.71659	4.78908	13.7692	2.13671	5.74389	7.97347	5.55774
																												2.1472	4.34927	2.35191	2.48426	2.32206	1.41594	0.989956	2.07144	6.23769	7.06994	1.94771	-7.09637	11.3503	5.75142	1.9026	3.67233	4.80329	13.5101	1.93251	5.90754	8.09748	5.52567
																												2.1716	4.30968	2.36034	2.51886	2.31907	1.44387	1.10717	1.8719	6.00174	7.52111	1.98835	-7.09377	11.1196	5.85486	1.81465	3.62649	4.80799	13.2114	1.69262	6.08814	8.1021	5.43234
																												2.196	4.27711	2.38535	2.58925	2.27251	1.45587	1.23447	1.70981	5.77353	8.06066	2.00231	-7.07875	10.8487	5.9438	1.73959	3.56946	4.80009	12.8717	1.41357	6.27062	8.00207	5.31559
																												2.2204	4.25108	2.43319	2.69744	2.19306	1.44147	1.37099	1.55246	5.57222	8.65819	2.00333	-7.04014	10.5399	6.01715	1.67724	3.49607	4.77938	12.4932	1.0953	6.44084	7.83297	5.21024
																												2.2448	4.22831	2.50384	2.842	2.09047	1.39579	1.51299	1.37329	5.4096	9.2746	2.01223	-6.97811	10.1991	6.07189	1.62637	3.41473	4.74911	12.0906	0.747352	6.58813	7.63252	5.13367
																												2.2692	4.19985	2.58824	3.01646	1.96666	1.31479	1.65386	1.17573	5.28835	9.85811	2.04594	-6.89983	9.83982	6.10503	1.58502	3.33993	4.7149	11.6916	0.390383	6.70611	7.43593	5.08694
																												2.2936	4.15302	2.67397	3.20871	1.82358	1.19714	1.7854	0.991848	5.20254	10.3542	2.10693	-6.81242	9.48208	6.11611	1.55037	3.27992	4.6822	11.3305	0.0530272	6.79189	7.27356	5.0651
																												2.318	4.07724	2.7529	3.40294	1.67096	1.0516	1.89893	0.855127	5.1409	10.7297	2.18659	-6.72253	9.14791	6.10831	1.51823	3.23223	4.65438	11.0416	-0.232934	6.84503	7.15496	5.06324
																												2.3424	3.96949	2.82505	3.58305	1.51966	0.901973	1.98721	0.77421	5.09158	10.9819	2.27238	-6.63701	8.85571	6.08841	1.48342	3.18563	4.63203	10.8519	-0.445297	6.86721	7.06165	5.07707
																												2.3668	3.83739	2.89674	3.73644	1.37288	0.777344	2.04771	0.731195	5.04524	11.1216	2.35073	-6.56053	8.61669	6.0656	1.44192	3.13021	4.61341	10.7764	-0.586734	6.86121	6.96304	5.10794
																												2.3912	3.69739	2.97455	3.8572	1.22906	0.696654	2.0838	0.707382	4.99523	11.1493	2.413	-6.49376	8.43259	6.0479	1.39231	3.06611	4.59558	10.8189	-0.682491	6.82894	6.83354	5.16909
																												2.4156	3.56679	3.05984	3.94674	1.08829	0.660818	2.10175	0.705036	4.93708	11.0471	2.46174	-6.43213	8.29546	6.0388	1.33518	2.99912	4.57546	10.9735	-0.76126	6.77055	6.6568	5.28004
																												2.44	3.45384	3.1503	4.01077	0.952521	0.654698	2.10675	0.738937	4.86889	10.7932	2.50725	-6.36554	8.18886	6.03703	1.27191	2.933	4.55017	11.222	-0.839748	6.6872	6.42755	5.45603
																												2.4644	3.35515	3.24589	4.05493	0.827071	0.661859	2.10082	0.813496	4.79174	10.3867	2.55951	-6.284	8.09123	6.03929	1.20415	2.86805	4.51748	11.534	-0.920969	6.58463	6.15667	5.70583
																												2.4888	3.26164	3.35031	4.08342	0.722348	0.677731	2.08268	0.909324	4.71045	9.85111	2.62703	-6.18641	7.98222	6.04265	1.13396	2.80406	4.47673	11.8756	-0.999014	6.47311	5.87099	6.03145
																												2.5132	3.16605	3.46579	4.10175	0.64615	0.700273	2.04875	0.990687	4.63403	9.22046	2.71839	-6.08319	7.84667	6.04533	1.06361	2.74527	4.42915	12.2164	-1.06043	6.3642	5.60524	6.42553
																												2.5376	3.06614	3.58789	4.11975	0.597408	0.716068	1.99506	1.02703	4.57431	8.53631	2.83853	-5.99053	7.67371	6.04759	0.994456	2.70418	4.37734	12.5273	-1.08666	6.26804	5.39112	6.87133
																												2.562	2.96311	3.70697	4.15022	0.572739	0.709965	1.91962	1.01076	4.54283	7.85534	2.984	-5.92138	7.45638	6.05193	0.926542	2.69756	4.32462	12.7798	-1.06531	6.19159	5.24671	7.3433
																												2.5864	2.85921	3.81396	4.20469	0.574196	0.683259	1.82395	0.964132	4.548	7.24651	3.14212	-5.88125	7.19343	6.06124	0.859869	2.73284	4.27345	12.953	-1.00297	6.13737	5.16982	7.80711
																												2.6108	2.75811	3.90371	4.28961	0.610231	0.650557	1.7126	0.929092	4.59321	6.77465	3.29653	-5.87284	6.8884	6.07704	0.795118	2.79947	4.22325	13.0417	-0.925975	6.10381	5.14179	8.22731
																												2.6352	2.66467	3.97533	4.40512	0.696957	0.621997	1.59122	0.942627	4.67597	6.48271	3.43276	-5.89953	6.54701	6.09985	0.732259	2.87954	4.17063	13.0551	-0.865667	6.08693	5.13948	8.58242
																												2.6596	2.58201	4.03074	4.54531	0.861088	0.597968	1.46497	1.01588	4.78792	6.38152	3.5352	-5.96042	6.17668	6.12988	0.669216	2.96167	4.11175	13.0109	-0.838325	6.08254	5.14418	8.86674
																												2.684	2.50939	4.0719	4.69889	1.13614	0.575302	1.33809	1.1254	4.91527	6.44775	3.5899	-6.04728	5.78587	6.16631	0.602459	3.03726	4.04415	12.9263	-0.831235	6.08785	5.14513	9.07204
																												2.7084	2.44345	4.09902	4.851	1.55149	0.549097	1.21411	1.22336	5.03922	6.62894	3.59981	-6.14989	5.38189	6.20637	0.528939	3.0942	3.96712	12.8147	-0.804949	6.1009	5.13773	9.17511
																												2.7328	2.37923	4.1123	4.98691	2.12295	0.512765	1.09598	1.26934	5.1375	6.85923	3.58707	-6.26072	4.97105	6.24589	0.448207	3.12252	3.88145	12.6881	-0.714359	6.11777	5.11304	9.14816
																												2.7572	2.31059	4.11364	5.09583	2.84948	0.4621	0.985951	1.25433	5.1873	7.08017	3.57375	-6.37195	4.56217	6.28235	0.363182	3.12007	3.78802	12.5606	-0.529828	6.13107	5.05378	8.9805
																												2.7816	2.23292	4.10485	5.17213	3.7113	0.399741	0.885053	1.19599	5.16971	7.25616	3.56766	-6.4709	4.16744	6.31848	0.278376	3.09293	3.68666	12.4469	-0.243964	6.13145	4.94851	8.69296
																												2.806	2.1464	4.08445	5.21496	4.65966	0.333212	0.793257	1.11998	5.0747	7.38198	3.56726	-6.54123	3.79839	6.36164	0.196904	3.0536	3.57723	12.3618	0.126732	6.10904	4.80323	8.33394
																												2.8304	2.05544	4.04713	5.2282	5.6016	0.265481	0.710325	1.04538	4.90448	7.47443	3.57099	-6.56763	3.46317	6.41855	0.118978	3.01571	3.46104	12.3203	0.539007	6.0543	4.63834	7.96006
																												2.8548	1.96602	3.98703	5.22021	6.40516	0.192722	0.63683	0.982788	4.67275	7.55414	3.57882	-6.54106	3.16766	6.4892	0.0435414	2.98838	3.341	12.3358	0.921794	5.96011	4.48006	7.61869
																												2.8792	1.88512	3.90274	5.20189	6.93927	0.115777	0.574448	0.938912	4.40105	7.64407	3.59242	-6.46359	2.91846	6.56441	-0.0280745	2.97365	3.22096	12.4172	1.18577	5.82441	4.34972	7.34244
																												2.9036	1.82005	3.79943	5.18373	7.12316	0.0473488	0.52516	0.915518	4.11536	7.77779	3.61602	-6.34902	2.72533	6.62904	-0.0903816	2.96735	3.10497	12.5678	1.25165	5.65194	4.25338	7.14839
																												2.928	1.77457	3.68488	5.1731	6.95169	0.00763888	0.490247	0.908432	3.8436	7.9852	3.64674	-6.21955	2.60009	6.6684	-0.135977	2.96511	2.99623	12.7847	1.0788	5.45398	4.18177	7.03684
																												2.9524	1.74606	3.56192	5.17293	6.49024	0.0208173	0.4701	0.911948	3.61285	8.26212	3.66561	-6.10091	2.55171	6.6726	-0.159325	2.96545	2.89639	13.0574	0.680165	5.24538	4.12188	6.99539
																												2.9768	1.7285	3.42626	5.18223	5.84378	0.114952	0.464652	0.920888	3.44478	8.5585	3.65324	-6.01525	2.5823	6.63704	-0.158933	2.96483	2.8048	13.3682	0.125985	5.04083	4.06646	7.0072
																												3.0012	1.71747	3.27269	5.19805	5.11075	0.313244	0.473916	0.926785	3.35047	8.79624	3.61468	-5.97579	2.68556	6.56146	-0.137613	2.95774	2.71871	13.6983	-0.481106	4.85224	4.01848	7.05673
																												3.0256	1.71243	3.10168	5.21788	4.35411	0.616256	0.498071	0.915263	3.32843	8.90292	3.57487	-5.98682	2.84688	6.44967	-0.101919	2.94625	2.63432	14.0348	-1.04961	4.68694	3.98856	7.13217
																												3.05	1.71546	2.91953	5.24117	3.60926	0.99522	0.536236	0.873778	3.36835	8.84576	3.54936	-6.04651	3.04424	6.30923	-0.0609552	2.94305	2.54783	14.3717	-1.51978	4.54699	3.98147	7.22197
																												3.0744	1.72856	2.73494	5.26917	2.90402	1.40382	0.584481	0.799528	3.45763	8.64694	3.53404	-6.14915	3.24912	6.14946	-0.023863	2.96276	2.45667	14.7051	-1.86006	4.43062	3.98664	7.30982
																												3.0988	1.75196	2.55614	5.3038	2.26402	1.79331	0.635176	0.694202	3.58618	8.37117	3.52016	-6.28355	3.42797	5.97824	0.00363333	3.01557	2.36062	15.0277	-2.06303	4.33449	3.98161	7.37892
																												3.1232	1.78529	2.38976	5.34643	1.70854	2.12176	0.678835	0.567436	3.74694	8.09995	3.50214	-6.42974	3.54735	5.80038	0.0213811	3.10528	2.26134	15.3305	-2.14729	4.25531	3.94535	7.42089
																												3.1476	1.83006	2.24101	5.39672	1.24681	2.36252	0.707717	0.456744	3.93296	7.90404	3.47201	-6.56182	3.58398	5.61908	0.0336091	3.22501	2.16114	15.6069	-2.15416	4.19092	3.87313	7.43616
																												3.172	1.89054	2.11439	5.45175	0.877465	2.5098	0.719585	0.422361	4.13416	7.81812	3.41849	-6.65523	3.53401	5.43822	0.0455162	3.35964	2.06273	15.8541	-2.13005	4.1405	3.7784	7.42878
																												3.1964	1.97202	2.01377	5.50612	0.592402	2.57019	0.719311	0.5076	4.33663	7.82681	3.33901	-6.69089	3.41433	5.26193	0.0602752	3.49755	1.96902	16.0684	-2.106	4.10367	3.68402	7.40441
																												3.2208	2.07843	1.94168	5.5528	0.381798	2.55123	0.716528	0.712264	4.52451	7.874	3.25165	-6.65709	3.25419	5.09294	0.0778136	3.63448	1.88274	16.2447	-2.09324	4.07948	3.61264	7.37064
																												3.2452	2.21145	1.89903	5.58425	0.236442	2.46488	0.721144	1.00263	4.68222	7.89485	3.18687	-6.55376	3.08244	4.933	0.0954579	3.76895	1.80637	16.3808	-2.09323	4.06578	3.57543	7.33538
																												3.2696	2.37032	1.88486	5.59339	0.14917	2.33173	0.739631	1.33382	4.79574	7.8443	3.16503	-6.39493	2.91979	4.78554	0.109489	3.89988	1.74199	16.4784	-2.10354	4.05888	3.56459	7.30447
																												3.294	2.55083	1.89638	5.57428	0.114825	2.17236	0.772624	1.66309	4.85373	7.7036	3.18806	-6.20369	2.77997	4.65702	0.117117	4.0217	1.69091	16.5374	-2.1142	4.05452	3.56035	7.28151
																												3.3184	2.74434	1.92868	5.52255	0.124705	1.99869	0.814618	1.95491	4.84856	7.47644	3.2464	-6.00461	2.67426	4.5555	0.117913	4.12026	1.65331	16.5536	-2.10534	4.05034	3.54454	7.26861
																												3.3428	2.93866	1.9747	5.43518	0.161722	1.81309	0.856587	2.18178	4.77676	7.1838	3.32057	-5.81898	2.61238	4.48684	0.1131	4.17915	1.62796	16.5186	-2.05445	4.04721	3.50427	7.26377
																												3.3672	3.12027	2.02691	5.31037	0.206193	1.61297	0.889564	2.32486	4.63925	6.85303	3.3815	-5.65982	2.60108	4.45074	0.104234	4.18689	1.61224	16.4239	-1.95255	4.0477	3.42928	7.25885
																												3.3916	3.27666	2.08016	5.14974	0.246854	1.40051	0.906613	2.37759	4.44218	6.50138	3.40303	-5.5262	2.64402	4.44016	0.0928994	4.13879	1.60302	16.265	-1.8127	4.0531	3.31527	7.24547
																												3.416	3.39853	2.13424	4.96085	0.284575	1.18958	0.902807	2.35048	4.19805	6.12895	3.37435	-5.40311	2.74151	4.44369	0.0802429	4.04026	1.59835	16.0455	-1.65834	4.06065	3.16701	7.22215
																												3.4404	3.48122	2.19382	4.75672	0.328104	1.00142	0.874611	2.27534	3.92523	5.73272	3.30061	-5.26786	2.88809	4.44765	0.0663567	3.90623	1.59889	15.7755	-1.50989	4.0627	2.99651	7.19397
																												3.4648	3.52525	2.26512	4.55189	0.388531	0.851094	0.820042	2.19566	3.64466	5.32315	3.19951	-5.09906	3.0718	4.43892	0.0505231	3.75393	1.6071	15.4643	-1.38525	4.0494	2.82316	7.16849
																												3.4892	3.5363	2.35209	4.35818	0.474511	0.738061	0.73993	2.14005	3.37505	4.92102	3.09274	-4.88828	3.27721	4.40921	0.0317876	3.60071	1.62534	15.1171	-1.30086	4.01425	2.66943	7.15372
																												3.5136	3.52436	2.45403	4.18291	0.590633	0.651652	0.638862	2.11107	3.1302	4.54415	2.99234	-4.65051	3.48823	4.35709	0.00911476	3.46344	1.65481	14.7402	-1.26352	3.95821	2.54642	7.15742
																												3.538	3.50164	2.5663	4.03059	0.741438	0.5826	0.524179	2.09814	2.91927	4.20126	2.8998	-4.42265	3.68747	4.28625	-0.0186822	3.3509	1.69498	14.3458	-1.26669	3.88882	2.44488	7.18584
																												3.5624	3.47872	2.68341	3.90519	0.934518	0.528385	0.403624	2.08573	2.74716	3.89286	2.81568	-4.24696	3.85613	4.20253	-0.052544	3.26172	1.74363	13.9504	-1.30102	3.81591	2.34256	7.24025
																												3.5868	3.46073	2.80094	3.8092	1.17534	0.492745	0.283157	2.05368	2.61263	3.61494	2.74121	-4.1487	3.97717	4.11197	-0.0917992	3.19229	1.79794	13.5742	-1.36485	3.74698	2.21964	7.31161
																												3.6112	3.44587	2.91559	3.74085	1.45885	0.485303	0.165839	1.98361	2.50621	3.35867	2.67597	-4.12035	4.03906	4.01978	-0.133188	3.13923	1.85599	13.2415	-1.45711	3.68374	2.07146	7.37837
																												3.6356	3.42716	3.02421	3.69387	1.76766	0.521417	0.0523817	1.87049	2.41183	3.11022	2.62386	-4.12501	4.03637	3.92997	-0.1722	3.09822	1.91738	12.9798	-1.56494	3.62283	1.91394	7.41394
																												3.66	3.39584	3.12194	3.66045	2.07744	0.613714	-0.0570992	1.73492	2.31293	2.8597	2.59828	-4.11819	3.96808	3.84512	-0.20492	3.07109	1.98213	12.8165	-1.66549	3.56025	1.7785	7.40173
																												3.6844	3.34431	3.20169	3.63345	2.36557	0.755349	-0.161302	1.61712	2.19927	2.6041	2.61022	-4.07072	3.83683	3.76681	-0.227641	3.0685	2.04922	12.7767	-1.73793	3.49346	1.69453	7.34387
																												3.7088	3.26777	3.25675	3.60682	2.61994	0.911674	-0.256523	1.54081	2.06931	2.34235	2.653	-3.97699	3.64966	3.69582	-0.235976	3.09545	2.11713	12.8786	-1.77235	3.41979	1.66891	7.25533
																												3.7332	3.16487	3.28382	3.57605	2.8409	1.0344	-0.336794	1.48825	1.92781	2.08295	2.70449	-3.84772	3.41851	3.63135	-0.22661	3.13936	2.18533	13.1304	-1.77086	3.33642	1.68573	7.15376
																												3.7576	3.03877	3.28332	3.5391	3.03464	1.08792	-0.396511	1.42245	1.78269	1.85357	2.74291	-3.69997	3.15818	3.57076	-0.200152	3.17816	2.25416	13.5313	-1.74519	3.24207	1.72517	7.05248
																												3.782	2.89862	3.25863	3.49646	3.20575	1.06481	-0.434288	1.32415	1.64394	1.69041	2.76085	-3.55413	2.88198	3.51044	-0.161121	3.1936	2.32362	14.0706	-1.71216	3.13682	1.77298	6.95476
																												3.8064	2.75898	3.21507	3.44993	3.355	0.986148	-0.4539	1.2048	1.52378	1.6174	2.7661	-3.43189	2.5988	3.44665	-0.115862	3.17656	2.39202	14.7217	-1.68413	3.02081	1.819	6.85702
																												3.8308	2.6371	3.15806	3.4022	3.48039	0.891448	-0.461468	1.0916	1.43578	1.63758	2.77455	-3.34971	2.31379	3.37649	-0.071582	3.128	2.45587	15.4368	-1.66386	2.89505	1.85602	6.76033
																												3.8552	2.54863	3.09071	3.35723	3.57734	0.819874	-0.462597	0.999573	1.39192	1.74101	2.80432	-3.3126	2.0309	3.29981	-0.036082	3.0577	2.51106	16.1542	-1.65114	2.76323	1.87471	6.67222
																												3.8796	2.50186	3.0133	3.31921	3.63908	0.796077	-0.461652	0.923841	1.39868	1.91268	2.86442	-3.31273	1.75465	3.21971	-0.0168417	2.97915	2.55405	16.8137	-1.64573	2.63164	1.86371	6.59746
																												3.904	2.49181	2.92629	3.28986	3.66063	0.827251	-0.461973	0.857767	1.45446	2.13035	2.94193	-3.3325	1.49052	3.13949	-0.0195214	2.90383	2.5824	17.3689	-1.64113	2.50713	1.81854	6.53774
																												3.9284	2.4993	2.83256	3.26797	3.64227	0.90452	-0.465532	0.799484	1.54994	2.36588	3.01179	-3.35352	1.24533	3.05937	-0.0461815	2.8395	2.595	17.7929	-1.6255	2.39547	1.74337	6.50216
																												3.9528	2.49782	2.7367	3.25193	3.58744	1.00872	-0.472278	0.743527	1.67067	2.59309	3.05985	-3.36813	1.02732	2.97682	-0.0940805	2.7903	2.59202	18.0762	-1.59189	2.30065	1.64889	6.50799
																												3.9772	2.46446	2.64413	3.24088	3.49868	1.11999	-0.480087	0.682505	1.80038	2.78744	3.08369	-3.38156	0.844809	2.88947	-0.15542	2.7559	2.57401	18.2209	-1.54059	2.2246	1.55741	6.56631
																												4.0016	2.38877	2.56033	3.23291	3.3778	1.22078	-0.485192	0.613908	1.92457	2.92823	3.07888	-3.40332	0.705721	2.79709	-0.218179	2.73157	2.54128	18.2338	-1.47224	2.16637	1.49792	6.67108
																												4.026	2.2762	2.48817	3.22411	3.23063	1.29414	-0.483196	0.543937	2.03269	3.01351	3.04369	-3.43877	0.618308	2.70073	-0.268929	2.71095	2.49479	18.1219	-1.38588	2.12166	1.4825	6.80296
																												4.0504	2.14485	2.42616	3.21099	3.06992	1.32858	-0.470591	0.492351	2.11865	3.06745	2.99527	-3.48566	0.59028	2.59996	-0.296472	2.69286	2.43687	17.8912	-1.27918	2.08414	1.49406	6.93776
																												4.0748	2.01713	2.36943	3.19374	2.91216	1.32308	-0.445119	0.487031	2.18082	3.12909	2.9646	-3.53404	0.6249	2.49061	-0.294203	2.68219	2.3706	17.546	-1.14557	2.04808	1.49953	7.04944
																												4.0992	1.91207	2.31202	3.1766	2.77206	1.28344	-0.40444	0.540837	2.22256	3.2302	2.97021	-3.57071	0.716953	2.365	-0.261018	2.67966	2.29891	17.0886	-0.979911	2.01014	1.47105	7.11626
																												4.1236	1.84054	2.24879	3.16495	2.65942	1.2148	-0.34542	0.638735	2.25274	3.37608	3.00701	-3.58807	0.852925	2.21537	-0.201502	2.6781	2.22441	16.5222	-0.790685	1.96924	1.40188	7.13129
																												4.148	1.80273	2.17563	3.16182	2.57912	1.12051	-0.265793	0.752998	2.28483	3.5472	3.06048	-3.59045	1.01591	2.03954	-0.126199	2.67021	2.14981	15.8561	-0.599921	1.92566	1.30259	7.10149
																												4.1724	1.78875	2.08951	3.16698	2.53084	1.01154	-0.166237	0.863162	2.33384	3.71918	3.11803	-3.59105	1.19027	1.84441	-0.0501255	2.65104	2.07873	15.1069	-0.430321	1.88068	1.1803	7.03693
																												4.1968	1.78294	1.99039	3.17833	2.50658	0.908377	-0.0500155	0.964931	2.41151	3.88078	3.16523	-3.60294	1.36314	1.64385	0.0126772	2.61206	2.01597	14.2977	-0.298808	1.83691	1.03278	6.94313
																												4.2212	1.76889	1.88338	3.19333	2.49157	0.827222	0.0782974	1.06654	2.52248	4.03483	3.18541	-3.63608	1.52493	1.4532	0.0547659	2.5403	1.96623	13.4592	-0.219927	1.7985	0.862505	6.82058
																												4.2456	1.73291	1.77865	3.20935	2.46937	0.772415	0.2124	1.17156	2.66335	4.18573	3.17088	-3.69835	1.66845	1.28509	0.0762761	2.42924	1.93222	12.6337	-0.201561	1.77152	0.685299	6.67138
																												4.27	1.66657	1.68702	3.2233	2.42471	0.741844	0.343886	1.26883	2.82488	4.33537	3.1279	-3.7932	1.78624	1.14779	0.0826149	2.28706	1.91348	11.8753	-0.236394	1.76337	0.525672	6.50453
																												4.2944	1.56919	1.6141	3.23163	2.34589	0.727682	0.463951	1.34377	2.99569	4.49083	3.06673	-3.91849	1.87036	1.04484	0.0816116	2.12702	1.90669	11.2401	-0.306166	1.77918	0.407611	6.33382
																												4.3188	1.45054	1.55899	3.23097	2.2302	0.708366	0.565508	1.39238	3.16471	4.66189	2.9919	-4.06856	1.91763	0.975677	0.0803835	1.95434	1.90775	10.7687	-0.39339	1.81738	0.347968	6.17387
																												4.3432	1.33223	1.51754	3.21902	2.08794	0.652139	0.643376	1.42403	3.32193	4.84464	2.90162	-4.23739	1.93543	0.937097	0.0831319	1.77066	1.91488	10.4747	-0.486666	1.86991	0.354833	6.0362
																												4.3676	1.24276	1.48555	3.19477	1.94046	0.539323	0.693444	1.45249	3.45909	5.01427	2.78806	-4.42026	1.93958	0.925387	0.0913221	1.58488	1.93002	10.3484	-0.581052	1.92715	0.429766	5.92303
																												4.392	1.20511	1.46068	3.15774	1.81137	0.376064	0.713575	1.47876	3.57121	5.14179	2.63952	-4.61324	1.94323	0.938932	0.104555	1.41129	1.95704	10.3697	-0.680567	1.98262	0.569535	5.82649
																												4.4164	1.22457	1.4421	3.10706	1.71445	0.184404	0.705832	1.48905	3.65783	5.21722	2.45453	-4.81219	1.94757	0.979356	0.120943	1.2625	1.99867	10.5134	-0.798174	2.03382	0.766027	5.73652
																												4.4408	1.28625	1.42806	3.04114	1.65025	-0.00999241	0.676772	1.47439	3.72323	5.25153	2.25942	-5.01294	1.94293	1.04905	0.138148	1.15024	2.0556	10.75	-0.945947	2.08004	1.00648	5.64723
																												4.4652	1.36293	1.41481	2.95848	1.614	-0.175928	0.634845	1.4424	3.77552	5.26345	2.10194	-5.21159	1.91698	1.14672	0.154691	1.08725	2.12752	11.0443	-1.12125	2.11975	1.27276	5.55884
																												4.4896	1.42716	1.39768	2.85857	1.60365	-0.277986	0.58695	1.41628	3.8239	5.2742	2.01523	-5.40198	1.86284	1.26505	0.170615	1.07763	2.21299	11.3581	-1.30342	2.14987	1.53854	5.47859
																												4.514	1.46085	1.37213	2.74189	1.62279	-0.29336	0.536823	1.42673	3.87509	5.30243	1.99107	-5.57302	1.78151	1.39254	0.187819	1.10212	2.30859	11.6551	-1.46481	2.16703	1.77084	5.4164
																												4.5384	1.45945	1.33542	2.60976	1.67815	-0.222817	0.485972	1.48568	3.93061	5.35205	1.9925	-5.71215	1.67881	1.5184	0.210194	1.12039	2.40949	11.9075	-1.58591	2.16995	1.94388	5.37739
																												4.5628	1.43053	1.28865	2.46491	1.77292	-0.0861001	0.43505	1.56883	3.9867	5.41133	1.98735	-5.81067	1.56212	1.6363	0.24301	1.09748	2.51112	12.098	-1.66462	2.16083	2.05526	5.36062
																												4.5872	1.38747	1.23621	2.31217	1.90329	0.0844233	0.384182	1.63691	4.03707	5.46763	1.96576	-5.86476	1.44065	1.7444	0.290759	1.02858	2.61071	12.2217	-1.71489	2.14321	2.12053	5.36081
																												4.6116	1.34122	1.18238	2.15843	2.06042	0.250654	0.333427	1.66657	4.07633	5.51731	1.93027	-5.87555	1.32748	1.84298	0.354303	0.934974	2.70718	12.2821	-1.75414	2.1174	2.15559	5.36915
																												4.636	1.29472	1.1295	2.01149	2.23258	0.384664	0.284652	1.65683	4.10129	5.56094	1.88427	-5.84923	1.23862	1.93235	0.429463	0.839416	2.79965	12.2882	-1.79055	2.07903	2.17233	5.37737
																												4.6604	1.24295	1.07964	1.87768	2.40479	0.484855	0.243242	1.61107	4.11032	5.60248	1.83286	-5.79506	1.18805	2.01264	0.508048	0.748191	2.88667	12.2526	-1.82205	2.02228	2.17982	5.38393
																												4.6848	1.17781	1.03687	1.75937	2.5595	0.569889	0.216659	1.52136	4.10267	5.65775	1.77942	-5.722	1.1828	2.08529	0.581462	0.652027	2.96718	12.1894	-1.84416	1.94359	2.17952	5.39448
																												4.7092	1.09283	1.00712	1.65456	2.6807	0.656379	0.210164	1.38065	4.07911	5.74726	1.72279	-5.63543	1.22231	2.15318	0.645054	0.543113	3.04182	12.1116	-1.85855	1.84359	2.1648	5.41642
																												4.7336	0.985341	0.996171	1.55984	2.75809	0.74672	0.223859	1.19925	4.04313	5.87517	1.6644	-5.53654	1.30059	2.21895	0.69966	0.434129	3.11248	12.0301	-1.87278	1.72672	2.12695	5.45558
																												4.758	0.856132	1.00907	1.47444	2.78757	0.828417	0.253208	0.998693	4.00042	6.02202	1.60851	-5.42562	1.4078	2.28416	0.749242	0.356633	3.17977	11.9564	-1.89188	1.59864	2.05989	5.51836
																												4.7824	0.708277	1.04995	1.40187	2.77061	0.883541	0.291346	0.801777	3.95601	6.15494	1.55369	-5.30641	1.53116	2.35021	0.79766	0.338792	3.24128	11.9049	-1.91675	1.46366	1.96203	5.61182
																												4.8068	0.547067	1.11996	1.3479	2.71501	0.908329	0.331136	0.626721	3.91211	6.24359	1.49028	-5.18608	1.65721	2.41885	0.847756	0.390337	3.29275	11.8927	-1.94885	1.32434	1.83714	5.73633
																												4.8312	0.381801	1.21543	1.31758	2.6354	0.919393	0.366041	0.47325	3.86855	6.27524	1.40914	-5.07145	1.7748	2.49161	0.901492	0.503812	3.33071	11.9327	-1.98829	1.18241	1.69317	5.8788
																												4.8556	0.227365	1.32852	1.31324	2.55075	0.941023	0.390073	0.319781	3.82505	6.2571	1.31504	-4.96692	1.8773	2.56934	0.958148	0.658821	3.35325	12.0275	-2.03039	1.03912	1.53701	6.01598
																												4.88	0.102325	1.44954	1.33365	2.48063	0.993328	0.398141	0.152914	3.7823	6.20296	1.22645	-4.87453	1.96394	2.652	1.01241	0.829449	3.36023	12.1705	-2.07089	0.894693	1.36995	6.12753
																												4.9044	0.0228076	1.56888	1.37387	2.44323	1.08659	0.387222	-0.0064354	3.74059	6.12301	1.16263	-4.79352	2.03899	2.73809	1.0561	0.997876	3.35442	12.3486	-2.11257	0.749584	1.18904	6.20821
																												4.9288	-0.00332663	1.67774	1.42625	2.45132	1.21782	0.357019	-0.12197	3.6979	6.02526	1.13116	-4.72071	2.10893	2.82465	1.08207	1.16024	3.3414	12.542	-2.16222	0.606862	0.991285	6.26593
																												4.9532	0.0224148	1.76835	1.4817	2.50355	1.36951	0.309505	-0.176673	3.65042	5.91762	1.12564	-4.6519	2.18034	2.90746	1.08708	1.31637	3.32709	12.7235	-2.22298	0.472452	0.774983	6.30912
																												4.9776	0.0913214	1.83506	1.53101	2.58044	1.51299	0.248298	-0.1752	3.59463	5.80858	1.14006	-4.5821	2.25873	2.98107	1.07315	1.45754	3.31543	12.8643	-2.29507	0.352827	0.539982	6.34267
																												5.002	0.189115	1.87574	1.56652	2.65311	1.61579	0.178165	-0.128532	3.52896	5.70808	1.177	-4.50674	2.34759	3.04004	1.04785	1.5663	3.30749	12.9426	-2.38109	0.252907	0.293584	6.37115
[truncated: 3 more columns]

## Sheet: Figure 4B
						Cue (left panel; VTA)														Action + Footshock (right panel; VTA)
	JP1	JP1	JP1	JP1	JP2	JP2	JP2	JP2	JP3	JP3	JP3	JP3				JP1	JP1	JP1	JP1	JP2	JP2	JP2	JP2	JP3	JP3	JP3	JP3
Session	S251	S252	S256	S320	S251	S252	S256	S320	S251	S252	S256	S320			Session	S251	S252	S256	S320	S251	S252	S256	S320	S251	S252	S256	S320
Subject	z-score of df/f	z-score of df/f	z-score of df/f	z-score of df/f	z-score of df/f	z-score of df/f	z-score of df/f	z-score of df/f	z-score of df/f	z-score of df/f	z-score of df/f	z-score of df/f			Subject	z-score of df/f	z-score of df/f	z-score of df/f	z-score of df/f	z-score of df/f	z-score of df/f	z-score of df/f	z-score of df/f	z-score of df/f	z-score of df/f	z-score of df/f	z-score of df/f
Peri-cue time - sec
-1.488	-0.16084	-0.17564	0.884153	0.751825	0.494627	0.000683	-0.18068	-0.8847	-0.36039	-0.48825	0.355597	0.272407
-1.464	-0.16839	-0.17279	0.914273	0.713948	0.786926	-0.08043	-0.05553	-0.79949	-0.31228	-0.46012	0.297618	0.423934			Peri-action time - sec
-1.44	-0.16548	-0.16426	0.913144	0.725251	1.01783	-0.17157	0.089968	-0.69688	-0.28644	-0.40931	0.240636	0.547457			-2.0496	0.821173	1.41369	-0.431052	0.158728	-0.566877	0.873727	-1.6319	0.217055	1.31777	-0.349683	0.0957393	-0.560848
-1.416	-0.15049	-0.15435	0.879689	0.785473	1.17626	-0.27139	0.251099	-0.58467	-0.27805	-0.34351	0.193374	0.64686			-2.0252	0.807064	1.47144	-0.404349	0.12109	-0.628075	0.983309	-1.56265	0.231597	1.29247	-0.307215	-0.0837674	-0.442385
-1.392	-0.13031	-0.14642	0.816787	0.887778	1.25723	-0.37673	0.416906	-0.47736	-0.28953	-0.26869	0.15745	0.73281			-2.0008	0.788773	1.52001	-0.378759	0.0759879	-0.696694	1.0682	-1.5019	0.230184	1.26066	-0.244101	-0.241216	-0.360135
-1.368	-0.11192	-0.14303	0.728952	1.02579	1.26624	-0.47957	0.568302	-0.39451	-0.3281	-0.18809	0.131653	0.815375			-1.9764	0.766017	1.55812	-0.350313	0.028361	-0.775603	1.13151	-1.44987	0.218248	1.23462	-0.173414	-0.333746	-0.320113
-1.344	-0.09755	-0.14726	0.620431	1.19307	1.21539	-0.56941	0.680652	-0.34982	-0.39829	-0.10845	0.115886	0.897121			-1.952	0.739726	1.58301	-0.316301	-0.01819	-0.865903	1.17006	-1.39787	0.204454	1.21866	-0.114952	-0.307201	-0.316287
-1.32	-0.08582	-0.16209	0.496218	1.37782	1.11612	-0.6403	0.728842	-0.34767	-0.49368	-0.04574	0.113385	0.974938			-1.9276	0.71403	1.59358	-0.271269	-0.0618347	-0.960205	1.17483	-1.33886	0.195178	1.20886	-0.0786396	-0.130884	-0.328259
-1.296	-0.07435	-0.18845	0.36408	1.56407	0.980736	-0.69614	0.696936	-0.38699	-0.59493	-0.01803	0.130545	1.04691			-1.9032	0.695463	1.591	-0.204231	-0.0992682	-1.04688	1.14014	-1.27275	0.187307	1.19785	-0.0589292	0.177295	-0.331773
-1.272	-0.06243	-0.22452	0.23401	1.73585	0.828283	-0.74888	0.585085	-0.46082	-0.67619	-0.03076	0.173204	1.10907			-1.8788	0.688582	1.57741	-0.102026	-0.126805	-1.12086	1.07103	-1.20357	0.170538	1.18242	-0.0421679	0.559729	-0.31507
-1.248	-0.05247	-0.26686	0.116165	1.87934	0.681898	-0.81063	0.404879	-0.55676	-0.71502	-0.07103	0.244999	1.14631			-1.8544	0.692087	1.55512	0.0422024	-0.142259	-1.18864	0.981431	-1.13649	0.141122	1.16664	-0.0177362	0.947631	-0.285622
-1.224	-0.04868	-0.31202	0.019036	1.98519	0.558492	-0.8875	0.168576	-0.66191	-0.70436	-0.11572	0.346628	1.13554			-1.83	0.700193	1.52616	0.225037	-0.146561	-1.26241	0.885285	-1.07662	0.109921	1.15785	0.0150326	1.28625	-0.263335
-1.2	-0.0554	-0.35759	-0.05251	2.05188	0.46182	-0.98211	-0.11551	-0.76396	-0.65852	-0.14534	0.472477	1.06234			-1.8056	0.708191	1.493	0.435413	-0.144166	-1.34975	0.790848	-1.02745	0.0929399	1.16232	0.04892	1.54781	-0.269848
-1.176	-0.07582	-0.40197	-0.09857	2.08759	0.383578	-1.10009	-0.43841	-0.85072	-0.60231	-0.15469	0.612087	0.934707			-1.7812	0.716604	1.45954	0.657188	-0.138503	-1.45055	0.704934	-0.990742	0.0973443	1.18322	0.0772235	1.72836	-0.317028
-1.152	-0.1105	-0.44278	-0.12276	2.10576	0.30967	-1.24949	-0.78544	-0.91514	-0.55223	-0.15213	0.754825	0.780957			-1.7568	0.72969	1.43026	0.872585	-0.127734	-1.56047	0.638448	-0.966581	0.122667	1.2183	0.0996814	1.83632	-0.396294
-1.128	-0.15718	-0.47633	-0.12972	2.12003	0.229215	-1.4334	-1.13743	-0.95882	-0.5082	-0.14756	0.891391	0.639856			-1.7324	0.750034	1.40887	1.06849	-0.107436	-1.67234	0.603148	-0.952057	0.170421	1.25996	0.122493	1.88528	-0.478268
-1.104	-0.21097	-0.49794	-0.12382	2.1444	0.141025	-1.64528	-1.47375	-0.98692	-0.46279	-0.14244	1.01728	0.551329			-1.708	0.775047	1.39798	1.23888	-0.0756511	-1.77735	0.603322	-0.939989	0.243026	1.29946	0.153894	1.89242	-0.529015
-1.08	-0.26372	-0.50261	-0.10702	2.19123	0.052381	-1.86996	-1.77381	-1.00208	-0.41614	-0.13038	1.13443	0.543771			-1.6836	0.798759	1.39842	1.37944	-0.0353333	-1.86957	0.631123	-0.919616	0.338732	1.33025	0.196895	1.88204	-0.532918
-1.056	-0.30603	-0.48615	-0.07883	2.26401	-0.02487	-2.08888	-2.01953	-1.00397	-0.37722	-0.10476	1.24524	0.622			-1.6592	0.816962	1.4072	1.48356	0.00506221	-1.9473	0.670322	-0.879853	0.452994	1.34946	0.246186	1.88583	-0.499378
-1.032	-0.33254	-0.44584	-0.04079	2.35473	-0.07535	-2.28752	-2.19844	-0.98999	-0.35141	-0.06784	1.35067	0.766931			-1.6348	0.831519	1.41574	1.54818	0.0351545	-2.0092	0.705673	-0.813465	0.580419	1.35741	0.293857	1.93202	-0.445244
-1.008	-0.34397	-0.38145	0.00232	2.44988	-0.08318	-2.45926	-2.30506	-0.9545	-0.33157	-0.03178	1.45319	0.947604			-1.6104	0.849502	1.41141	1.57914	0.0487961	-2.04877	0.728658	-0.720715	0.716627	1.35644	0.335551	2.03146	-0.377053
-0.984	-0.34243	-0.29789	0.048342	2.53574	-0.04051	-2.60347	-2.34046	-0.89303	-0.30266	-0.00882	1.55038	1.13638			-1.586	0.875872	1.3831	1.58692	0.0452083	-2.05019	0.735254	-0.61075	0.859139	1.35208	0.368666	2.17058	-0.296773
-0.96	-0.32733	-0.20529	0.100665	2.59832	0.045476	-2.7226	-2.31132	-0.80862	-0.25386	-0.00312	1.62924	1.31297			-1.5616	0.907256	1.32572	1.58353	0.026352	-1.99113	0.72102	-0.496298	1.00428	1.35396	0.387822	2.3221	-0.214856
-0.936	-0.29842	-0.11512	0.162999	2.62372	0.153999	-2.82114	-2.22917	-0.70956	-0.18531	-0.01029	1.67959	1.45672			-1.5372	0.935046	1.23976	1.5852	-0.00466281	-1.8547	0.679958	-0.384909	1.14505	1.37251	0.385483	2.46098	-0.14441
-0.912	-0.26113	-0.03762	0.233625	2.60195	0.257842	-2.90482	-2.10857	-0.60171	-0.10729	-0.02045	1.70568	1.54542			-1.5128	0.954179	1.12809	1.60968	-0.0455316	-1.64192	0.608055	-0.278139	1.27358	1.4118	0.356313	2.56703	-0.0861365
-0.888	-0.2249	0.018001	0.306189	2.53135	0.331985	-2.97875	-1.96408	-0.48378	-0.03598	-0.02367	1.71648	1.56641			-1.4884	0.968553	0.993962	1.66625	-0.0972915	-1.37643	0.508853	-0.179037	1.38845	1.46447	0.301019	2.62789	-0.0300328
-0.864	-0.19476	0.04533	0.373728	2.42059	0.361784	-3.04442	-1.80878	-0.34896	0.01692	-0.01631	1.71558	1.52578			-1.464	0.989805	0.841025	1.74966	-0.163563	-1.09987	0.397311	-0.0976388	1.50057	1.51601	0.227971	2.64685	0.0278172
-0.84	-0.16724	0.045615	0.429542	2.28818	0.346029	-3.09858	-1.65507	-0.19236	0.056168	-0.00172	1.70394	1.44682			-1.4396	1.03055	0.674974	1.84287	-0.243636	-0.855088	0.29673	-0.0467832	1.62707	1.55522	0.150687	2.63995	0.080427
-0.816	-0.13561	0.030171	0.46641	2.15975	0.29226	-3.13713	-1.51321	-0.01855	0.102093	0.014277	1.68502	1.36137			-1.4152	1.09596	0.504766	1.92459	-0.326213	-0.664052	0.226712	-0.0305481	1.77517	1.58047	0.0815876	2.62277	0.122848
-0.792	-0.09544	0.016365	0.477664	2.06034	0.211069	-3.16175	-1.38977	0.159034	0.175182	0.026858	1.66652	1.29452			-1.3908	1.17982	0.340368	1.97676	-0.39446	-0.52377	0.190311	-0.0397376	1.93151	1.59822	0.0272809	2.60204	0.160573
-0.768	-0.04577	0.019529	0.458798	2.00516	0.114097	-3.18212	-1.28907	0.3277	0.281815	0.032946	1.65709	1.25358			-1.3664	1.26755	0.188391	1.99016	-0.436138	-0.424491	0.172508	-0.0597721	2.06968	1.61716	-0.012234	2.57783	0.206857
-0.744	0.011519	0.047235	0.409322	1.99501	0.010721	-3.21102	-1.21411	0.48051	0.41144	0.029301	1.66011	1.23572			-1.342	1.34449	0.0512416	1.96729	-0.446368	-0.365222	0.152181	-0.0781224	2.16924	1.64169	-0.0427912	2.54661	0.274401
-0.72	0.072559	0.098677	0.334134	2.0168	-0.09719	-3.25478	-1.16571	0.610906	0.542299	0.009993	1.67032	1.23641			-1.3176	1.40424	-0.0700282	1.92009	-0.426849	-0.352215	0.117415	-0.0840403	2.22868	1.66711	-0.0726177	2.50173	0.360565
-0.696	0.131497	0.167439	0.24142	2.04726	-0.21428	-3.30448	-1.14175	0.709745	0.653135	-0.03001	1.67891	1.24542			-1.2932	1.44814	-0.173291	1.86387	-0.385584	-0.389862	0.0711773	-0.0674654	2.26474	1.67991	-0.104643	2.43948	0.443604
-0.672	0.179969	0.246013	0.139193	2.06223	-0.34369	-3.33662	-1.13677	0.769174	0.735012	-0.088	1.68115	1.24817			-1.2688	1.47571	-0.255113	1.81182	-0.332302	-0.474127	0.0226702	-0.0223178	2.30103	1.66617	-0.131719	2.36495	0.499277
-0.648	0.209874	0.329292	0.035208	2.04949	-0.48215	-3.32795	-1.14244	0.787165	0.794384	-0.15276	1.67543	1.23527			-1.2444	1.48165	-0.312105	1.7722	-0.275253	-0.591244	-0.0266177	0.0509588	2.35239	1.62143	-0.144211	2.2847	0.516121
-0.624	0.219976	0.41488	-0.06192	2.01074	-0.6217	-3.27488	-1.1493	0.770369	0.846516	-0.2098	1.65821	1.20322			-1.22	1.46545	-0.342431	1.74925	-0.223884	-0.72272	-0.0859642	0.146826	2.41757	1.55215	-0.143417	2.20056	0.498441
-0.6	0.21838	0.501082	-0.14452	1.95035	-0.75253	-3.19899	-1.14726	0.732804	0.905687	-0.24816	1.62655	1.14963			-1.1956	1.43672	-0.346945	1.74677	-0.187425	-0.851288	-0.164225	0.256187	2.48788	1.4693	-0.144498	2.11635	0.461522
-0.576	0.216074	0.584372	-0.20768	1.8693	-0.86232	-3.1318	-1.12469	0.690261	0.978998	-0.26478	1.58321	1.07562			-1.1712	1.40714	-0.329539	1.76936	-0.170704	-0.962013	-0.258895	0.368186	2.55789	1.38067	-0.167186	2.03703	0.425151
-0.552	0.219468	0.659193	-0.2487	1.76978	-0.93537	-3.09194	-1.07159	0.654292	1.06281	-0.26229	1.53344	0.988232			-1.1468	1.38225	-0.296085	1.81984	-0.176652	-1.0438	-0.354846	0.473805	2.62367	1.28807	-0.225265	1.95789	0.41029
-0.528	0.228795	0.722	-0.26873	1.65618	-0.95806	-3.07357	-0.98648	0.627818	1.14236	-0.24238	1.47748	0.898452			-1.1224	1.36275	-0.252309	1.89658	-0.208848	-1.09392	-0.431066	0.568425	2.67722	1.191	-0.320401	1.86405	0.433751
-0.504	0.238645	0.775773	-0.27486	1.53356	-0.92647	-3.05318	-0.87917	0.609433	1.20212	-0.20325	1.41127	0.81467			-1.098	1.34939	-0.201567	1.99391	-0.26724	-1.11816	-0.473397	0.650815	2.70899	1.09299	-0.439275	1.74015	0.495889
-0.48	0.239489	0.828238	-0.27691	1.41229	-0.84627	-3.00881	-0.76551	0.605822	1.2403	-0.14394	1.33371	0.732749			-1.0736	1.34405	-0.144822	2.10549	-0.343544	-1.12753	-0.484432	0.719847	2.71369	1.00447	-0.558195	1.57705	0.574478
-0.456	0.224683	0.884575	-0.2826	1.30673	-0.72756	-2.93733	-0.6572	0.631969	1.26925	-0.07158	1.24839	0.636611			-1.0492	1.34932	-0.0831911	2.22682	-0.423931	-1.13513	-0.47914	0.77387	2.69072	0.939782	-0.657781	1.37007	0.640333
-0.432	0.197725	0.943459	-0.29609	1.22411	-0.58308	-2.85712	-0.55663	0.696945	1.30207	-0.00374	1.16152	0.511578			-1.0248	1.36882	-0.0188558	2.35417	-0.497488	-1.14948	-0.471397	0.813224	2.64234	0.910031	-0.73525	1.11786	0.679
-0.408	0.16997	1.00018	-0.31893	1.16109	-0.43007	-2.79514	-0.46116	0.796457	1.34394	0.040347	1.08445	0.354761			-1.0004	1.40459	0.0469654	2.48218	-0.559223	-1.17027	-0.465751	0.839999	2.57397	0.91497	-0.801536	0.829805	0.694623
-0.384	0.152042	1.05154	-0.35103	1.11156	-0.29027	-2.76888	-0.37119	0.917822	1.39354	0.052839	1.03208	0.174972			-0.976	1.45335	0.114825	2.60309	-0.605417	-1.19231	-0.459125	0.855345	2.49361	0.940297	-0.867774	0.529513	0.703006
-0.36	0.148986	1.09732	-0.38912	1.07441	-0.18314	-2.77631	-0.29311	1.05031	1.44629	0.042005	1.0133	-0.01063			-0.9516	1.50765	0.184806	2.70999	-0.632955	-1.20905	-0.448955	0.858908	2.40926	0.966245	-0.935631	0.247241	0.725732
-0.336	0.160934	1.13828	-0.4245	1.05361	-0.11603	-2.80066	-0.23335	1.18958	1.49952	0.02485	1.02603	-0.17705			-0.9272	1.55798	0.254496	2.80162	-0.64317	-1.21338	-0.440014	0.84957	2.32696	0.980478	-0.998357	0.0121288	0.780272
-0.312	0.184218	1.17451	-0.44587	1.05339	-0.08125	-2.82389	-0.19332	1.32848	1.55769	0.014057	1.06162	-0.29749			-0.9028	1.5921	0.31986	2.88128	-0.642542	-1.20252	-0.442113	0.827037	2.24834	0.983755	-1.04761	-0.153834	0.871032
-0.288	0.212942	1.20552	-0.44672	1.07416	-0.0611	-2.83706	-0.17298	1.45177	1.62836	0.009181	1.11271	-0.35886			-0.8784	1.59877	0.377731	2.95191	-0.640355	-1.18234	-0.461142	0.795318	2.16806	0.987087	-1.08094	-0.242066	0.991128
-0.264	0.242672	1.23059	-0.42933	1.10928	-0.03596	-2.84147	-0.17235	1.54527	1.71149	-0.001	1.17292	-0.37419			-0.854	1.57568	0.427277	3.0164	-0.643592	-1.16142	-0.492021	0.763147	2.07625	1.00524	-1.10705	-0.258115	1.12227
-0.24	0.271769	1.24884	-0.40379	1.1447	0.008042	-2.84369	-0.18726	1.60241	1.79267	-0.02812	1.23128	-0.38148			-0.8296	1.53128	0.469513	3.08034	-0.652025	-1.14283	-0.520157	0.739394	1.96542	1.04811	-1.14232	-0.215596	1.22894
-0.216	0.29826	1.25825	-0.38463	1.16542	0.075456	-2.85065	-0.21098	1.62206	1.84546	-0.07441	1.27674	-0.42569			-0.8052	1.48011	0.505494	3.15075	-0.659394	-1.12661	-0.53202	0.729693	1.83622	1.11413	-1.19792	-0.129284	1.26896
-0.192	0.316925	1.25535	-0.38396	1.16786	0.162466	-2.86724	-0.24095	1.60541	1.84434	-0.13061	1.30435	-0.53351			-0.7808	1.43599	0.535039	3.23273	-0.658575	-1.11662	-0.52416	0.734258	1.7001	1.19391	-1.27099	-0.0189106	1.22349
-0.168	0.320721	1.23704	-0.40367	1.1638	0.259673	-2.89252	-0.27741	1.5535	1.7825	-0.18319	1.31096	-0.70391			-0.7564	1.40457	0.557574	3.32674	-0.645958	-1.11988	-0.500733	0.744508	1.5763	1.27902	-1.34936	0.0802016	1.11564
-0.144	0.304725	1.20188	-0.43559	1.16694	0.355396	-2.9171	-0.31662	1.46798	1.67773	-0.22558	1.28998	-0.91784			-0.732	1.38048	0.573544	3.42502	-0.622777	-1.14027	-0.465123	0.745364	1.48116	1.36421	-1.42089	0.124583	0.994867
-0.12	0.268093	1.14983	-0.46846	1.18047	0.440734	-2.9286	-0.35011	1.356	1.55899	-0.2635	1.23504	-1.15063			-0.7076	1.35181	0.583531	3.50958	-0.593225	-1.17689	-0.416539	0.72502	1.4192	1.44439	-1.47874	0.0860209	0.907806
-0.096	0.214549	1.08192	-0.49253	1.19966	0.512637	-2.9213	-0.37055	1.23288	1.44817	-0.30682	1.14832	-1.37738			-0.6832	1.30773	0.585969	3.55762	-0.562089	-1.22728	-0.352817	0.681572	1.38335	1.51251	-1.52647	-0.0396684	0.882761
-0.072	0.152981	0.999703	-0.49936	1.21663	0.570462	-2.8994	-0.37552	1.11928	1.35349	-0.35619	1.04126	-1.57336			-0.6588	1.24442	0.577001	3.55212	-0.533166	-1.28819	-0.272785	0.619919	1.36235	1.55636	-1.5812	-0.242714	0.92303
-0.048	0.095632	0.904929	-0.48172	1.22075	0.61264	-2.87121	-0.36675	1.03343	1.27209	-0.40041	0.925877	-1.71652			-0.6344	1.16579	0.553059	3.48866	-0.510591	-1.3559	-0.174502	0.545859	1.34873	1.5576	-1.66353	-0.50289	1.00805
-0.024	0.053405	0.799624	-0.43689	1.20193	0.636085	-2.84174	-0.3494	0.982562	1.19491	-0.42627	0.810945	-1.79194			-0.61	1.07928	0.513112	3.37333	-0.500009	-1.42801	-0.0532737	0.465686	1.3383	1.50106	-1.78061	-0.782803	1.10764
0	0.032357	0.687548	-0.37015	1.15543	0.635558	-2.81212	-0.33203	0.964579	1.1149	-0.43157	0.710136	-1.7897			-0.5856	0.99268	0.459375	3.21469	-0.50294	-1.50357	0.0962911	0.389428	1.3265	1.38985	-1.92235	-1.03393	1.19532
0.024	0.03458	0.575293	-0.2944	1.08514	0.607061	-2.78496	-0.32379	0.977252	1.03263	-0.43015	0.650893	-1.70142			-0.5612	0.912622	0.39712	3.02087	-0.511872	-1.5828	0.275143	0.329582	1.31167	1.25074	-2.07202	-1.21114	1.25362
0.048	0.060317	0.469253	-0.22543	1.00344	0.552011	-2.76986	-0.33166	1.01823	0.951931	-0.44345	0.667889	-1.52991			-0.5368	0.841132	0.332604	2.80332	-0.512084	-1.66722	0.47525	0.294671	1.29632	1.121	-2.21762	-1.27555	1.27739
0.072	0.108353	0.371971	-0.1756	0.923571	0.474209	-2.78389	-0.36031	1.07813	0.871275	-0.4852	0.780778	-1.30239			-0.5124	0.77536	0.27005	2.57939	-0.485708	-1.75686	0.678584	0.286701	1.28085	1.02672	-2.35686	-1.19384	1.27233
0.096	0.177626	0.283472	-0.15003	0.850233	0.373995	-2.84285	-0.41052	1.14098	0.780373	-0.55164	0.978094	-1.06811			-0.488	0.71337	0.210924	2.37084	-0.419735	-1.84736	0.861973	0.303779	1.2612	0.971186	-2.49488	-0.941451	1.2514
0.12	0.269843	0.204469	-0.14733	0.779059	0.247706	-2.94889	-0.47853	1.1919	0.667476	-0.62546	1.22295	-0.88209			-0.4636	0.657519	0.155042	2.19749	-0.316671	-1.93101	1.00755	0.342377	1.23191	0.939134	-2.63716	-0.506743	1.23618
0.144	0.387564	0.136146	-0.16249	0.705485	0.09315	-3.08637	-0.56006	1.22375	0.532226	-0.68941	1.47131	-0.78121			-0.4392	0.612753	0.100649	2.06898	-0.1984	-2.00033	1.11133	0.398449	1.18758	0.911041	-2.78349	0.100547	1.25212
0.168	0.526687	0.078673	-0.19003	0.632309	-0.08279	-3.22947	-0.65175	1.23886	0.3887	-0.73808	1.68812	-0.76503			-0.4148	0.582515	0.0446147	1.98337	-0.0969772	-2.05063	1.18207	0.467549	1.12866	0.875016	-2.92767	0.841314	1.31181
0.192	0.670031	0.032095	-0.22633	0.56815	-0.26125	-3.3556	-0.74638	1.24506	0.254857	-0.78053	1.85559	-0.8037			-0.3904	0.5639	-0.0156595	1.93436	-0.035855	-2.07769	1.23237	0.545021	1.06628	0.826511	-3.06085	1.64889	1.4028
0.216	0.790469	-0.00382	-0.26863	0.520791	-0.41772	-3.45668	-0.83203	1.25138	0.139532	-0.83069	1.97119	-0.86594			-0.366	0.547527	-0.0809678	1.91877	-0.0186678	-2.07561	1.26895	0.6259	1.01512	0.760832	-3.17589	2.44238	1.49353
0.24	0.865045	-0.03211	-0.31322	0.491504	-0.53351	-3.54059	-0.89885	1.26567	0.037314	-0.89253	2.04031	-0.93075			-0.3416	0.523292	-0.150113	1.936	-0.0350967	-2.04154	1.28861	0.702591	0.984431	0.669354	-3.27039	3.14618	1.5559
0.264	0.889143	-0.05791	-0.35707	0.47324	-0.60441	-3.61994	-0.9435	1.29101	-0.06598	-0.9541	2.07166	-0.97853			-0.3172	0.485339	-0.219477	1.98316	-0.0718116	-1.98004	1.28518	0.763523	0.975809	0.542677	-3.3464	3.69743	1.58484
0.288	0.876011	-0.08419	-0.3993	0.456429	-0.63992	-3.69744	-0.96799	1.32237	-0.18244	-0.99529	2.07623	-0.99038			-0.2928	0.433456	-0.283869	2.05012	-0.118673	-1.90081	1.26172	0.795857	0.987457	0.377826	-3.40902	4.04357	1.59497
0.312	0.843185	-0.10941	-0.43874	0.439175	-0.65471	-3.76183	-0.97771	1.34891	-0.31312	-1.00252	2.06959	-0.95751			-0.2684	0.373289	-0.338568	2.11644	-0.169249	-1.81616	1.23464	0.790013	1.02173	0.184286	-3.46418	4.15368	1.60306
0.336	0.80217	-0.1288	-0.47314	0.427336	-0.66168	-3.79713	-0.9784	1.35934	-0.44518	-0.97865	2.07201	-0.88699			-0.244	0.314141	-0.380239	2.15821	-0.21831	-1.73978	1.22596	0.741684	1.08405	-0.016932	-3.51244	4.03411	1.61823
0.36	0.758577	-0.13784	-0.50207	0.42361	-0.67081	-3.79471	-0.97193	1.34324	-0.55867	-0.94183	2.10158	-0.79912			-0.2196	0.263027	-0.407165	2.16145	-0.261995	-1.68259	1.25089	0.650082	1.17342	-0.202143	-3.54421	3.72317	1.64444
0.384	0.717066	-0.13485	-0.52818	0.424523	-0.69103	-3.75762	-0.95526	1.29196	-0.64234	-0.91523	2.16525	-0.71409			-0.1952	0.220101	-0.419685	2.12789	-0.299012	-1.6494	1.31051	0.517366	1.2788	-0.353212	-3.54559	3.27423	1.68429
0.408	0.685386	-0.12071	-0.5555	0.427736	-0.73082	-3.69727	-0.92399	1.20494	-0.70469	-0.91212	2.25432	-0.64255			-0.1708	0.181214	-0.420122	2.07166	-0.330401	-1.64056	1.39444	0.352542	1.3846	-0.45708	-3.51016	2.75059	1.73385
0.432	0.673465	-0.09798	-0.58808	0.434585	-0.7943	-3.62652	-0.87626	1.09257	-0.76806	-0.92626	2.35134	-0.58625			-0.1464	0.147206	-0.412847	2.01036	-0.358876	-1.65497	1.48852	0.175094	1.47765	-0.50187	-3.44372	2.2256	1.77653
0.456	0.687679	-0.07004	-0.62922	0.44605	-0.87907	-3.55305	-0.81423	0.969479	-0.85462	-0.93889	2.44026	-0.53999			-0.122	0.128945	-0.403858	1.95353	-0.38446	-1.69009	1.57997	0.0118666	1.55046	-0.478833	-3.35873	1.7682	1.79115
0.48	0.726935	-0.03983	-0.67975	0.460176	-0.98136	-3.47789	-0.74481	0.84769	-0.97649	-0.93689	2.50816	-0.49826			-0.0976	0.139585	-0.3979	1.8994	-0.401051	-1.74064	1.65786	-0.111948	1.60243	-0.388678	-3.2646	1.42141	1.7655
0.504	0.785094	-0.01019	-0.73605	0.474096	-1.10155	-3.39848	-0.67829	0.737631	-1.1293	-0.92419	2.54712	-0.46226			-0.0732	0.184577	-0.396067	1.84441	-0.402719	-1.79899	1.71145	-0.181183	1.64097	-0.244483	-3.16176	1.19631	1.69821
0.528	0.85701	0.014847	-0.78996	0.488491	-1.24528	-3.31133	-0.62166	0.651861	-1.29241	-0.91786	2.55926	-0.43834			-0.0488	0.260427	-0.397056	1.79426	-0.390826	-1.85753	1.72953	-0.196095	1.67878	-0.0684255	-3.04421	1.08107	1.59462
0.552	0.941764	0.031913	-0.8322	0.509045	-1.42041	-3.21384	-0.57512	0.600062	-1.44132	-0.93408	2.55484	-0.4331			-0.0244	0.35724	-0.399192	1.76495	-0.371865	-1.91204	1.70445	-0.172679	1.7246	0.114284	-2.90785	1.05021	1.46887
0.576	1.0406	0.041323	-0.85711	0.542749	-1.6283	-3.10704	-0.53734	0.580485	-1.56341	-0.97539	2.54385	-0.45288			0	0.461656	-0.400656	1.77421	-0.352572	-1.96235	1.63839	-0.133157	1.776	0.281135	-2.75364	1.07323	1.34265
0.6	1.1531	0.046917	-0.86434	0.593372	-1.85442	-2.9969	-0.50893	0.584201	-1.66238	-1.02905	2.53057	-0.50584			0.0244	0.563304	-0.400145	1.83016	-0.337827	-2.00865	1.54547	-0.0928335	1.8232	0.416756	-2.58286	1.123	1.23279
0.624	1.27573	0.053236	-0.85626	0.658741	-2.07123	-2.89156	-0.49126	0.603558	-1.7498	-1.07668	2.51507	-0.59713			0.0488	0.659916	-0.398743	1.92417	-0.329336	-2.04719	1.44583	-0.055658	1.85786	0.51505	-2.39611	1.17769	1.14591
0.648	1.40416	0.062361	-0.83557	0.728796	-2.25213	-2.79757	-0.48498	0.630799	-1.8339	-1.10574	2.49508	-0.71936			0.0732	0.754295	-0.400038	2.03439	-0.325726	-2.06978	1.35383	-0.017508	1.87587	0.578643	-2.19869	1.2215	1.08918
0.672	1.53632	0.072375	-0.80481	0.786491	-2.38196	-2.71861	-0.48799	0.656669	-1.91336	-1.11484	2.46635	-0.84904			0.0976	0.846382	-0.407567	2.1401	-0.325376	-2.06839	1.27204	0.0300914	1.8757	0.615264	-2.00185	1.25063	1.07609
0.696	1.67219	0.079284	-0.7645	0.81307	-2.45892	-2.65573	-0.49552	0.673609	-1.9751	-1.11075	2.42649	-0.95085			0.122	0.929337	-0.421782	2.23218	-0.328635	-2.04167	1.199	0.0949526	1.8611	0.6325	-1.81953	1.27886	1.11617
0.72	1.80984	0.080545	-0.71225	0.795308	-2.49021	-2.60865	-0.50449	0.679137	-1.99672	-1.10228	2.37877	-0.99328			0.1464	0.993797	-0.439429	2.3099	-0.337044	-1.9962	1.13918	0.179221	1.84558	0.63698	-1.6655	1.33054	1.20353
0.744	1.94219	0.075502	-0.64582	0.733986	-2.48646	-2.5784	-0.51622	0.677937	-1.96014	-1.09802	2.32739	-0.96827			0.1708	1.03314	-0.456762	2.3746	-0.351633	-1.94068	1.10238	0.2802	1.84655	0.63806	-1.54901	1.42351	1.31842
0.768	2.05698	0.062546	-0.565	0.648632	-2.45939	-2.5704	-0.53247	0.677837	-1.86963	-1.10616	2.27352	-0.89124			0.1952	1.04261	-0.472965	2.42787	-0.371683	-1.87842	1.09649	0.394573	1.87314	0.648996	-1.46872	1.55877	1.43973
0.792	2.13937	0.038367	-0.47103	0.569782	-2.42046	-2.59305	-0.55078	0.682048	-1.75149	-1.13011	2.2196	-0.78295			0.2196	1.01644	-0.489583	2.46796	-0.394422	-1.80547	1.12096	0.520964	1.92324	0.685792	-1.41126	1.72324	1.55647
0.816	2.17778	0.001114	-0.36865	0.523883	-2.38267	-2.65071	-0.56622	0.684206	-1.63319	-1.16477	2.16882	-0.65868			0.244	0.949683	-0.507828	2.48666	-0.417429	-1.71795	1.16326	0.659817	1.9881	0.766124	-1.35704	1.90403	1.67171
0.84	2.17069	-0.04722	-0.26854	0.522228	-2.36421	-2.73776	-0.57559	0.669542	-1.52592	-1.20157	2.11814	-0.53487			0.2684	0.845112	-0.526796	2.47573	-0.440382	-1.62063	1.2039	0.809579	2.0547	0.904784	-1.28931	2.09914	1.79746
0.864	2.12816	-0.1011	-0.18367	0.558631	-2.38441	-2.84065	-0.57978	0.625094	-1.42176	-1.23592	2.05806	-0.43749			0.2928	0.716142	-0.5425	2.43499	-0.461905	-1.52923	1.22977	0.962203	2.10593	1.10742	-1.20141	2.30613	1.94669
0.888	2.0659	-0.15192	-0.12149	0.618052	-2.45361	-2.94684	-0.58666	0.552338	-1.30565	-1.26827	1.97874	-0.39319			0.3172	0.579499	-0.549065	2.36939	-0.479301	-1.46506	1.2425	1.10434	2.12109	1.37019	-1.09679	2.50443	2.13158
0.912	1.99737	-0.19043	-0.08136	0.688219	-2.56331	-3.05265	-0.60878	0.46833	-1.17893	-1.30327	1.87431	-0.41101			0.3416	0.445116	-0.542493	2.2841	-0.494673	-1.44139	1.25467	1.22407	2.08202	1.68536	-0.980185	2.65549	2.36283
0.936	1.92948	-0.21281	-0.05944	0.760472	-2.68314	-3.16111	-0.65539	0.392439	-1.06721	-1.34874	1.74179	-0.47593			0.366	0.314457	-0.52163	2.1893	-0.516668	-1.45097	1.28065	1.31632	1.98498	2.04757	-0.848006	2.71362	2.64522
0.96	1.86435	-0.22375	-0.05309	0.824333	-2.77219	-3.27113	-0.72975	0.332092	-0.99719	-1.40926	1.5803	-0.56124			0.3904	0.188404	-0.483873	2.10908	-0.556591	-1.47123	1.32893	1.38333	1.84566	2.45512	-0.68852	2.63641	2.97425
0.984	1.80391	-0.23284	-0.059	0.87044	-2.79807	-3.37108	-0.83385	0.281491	-0.974	-1.47916	1.39587	-0.65098			0.4148	0.0769109	-0.420823	2.08523	-0.62432	-1.47934	1.39972	1.43345	1.69407	2.90289	-0.491512	2.40153	3.33295
1.008	1.74989	-0.24887	-0.07017	0.898049	-2.74929	-3.44352	-0.97221	0.231659	-0.98148	-1.54361	1.20361	-0.74968			0.4392	0.00491257	-0.318512	2.1663	-0.720052	-1.45525	1.48822	1.47863	1.56971	3.37434	-0.25702	2.02178	3.69465
1.032	1.69958	-0.27764	-0.07723	0.913449	-2.63642	-3.47612	-1.15067	0.179095	-0.99153	-1.58654	1.02288	-0.8688			0.4636	0.0148933	-0.161953	2.38298	-0.82536	-1.37508	1.59121	1.52662	1.5166	3.84514	0.00242185	1.53714	4.03631
1.056	1.64608	-0.3229	-0.07232	0.921694	-2.48329	-3.47139	-1.36962	0.12459	-0.975	-1.598	0.872344	-1.01096			0.488	0.16435	0.0591045	2.73196	-0.905305	-1.20766	1.71476	1.57238	1.57261	4.29718	0.268267	0.996597	4.34806
1.08	1.58471	-0.38661	-0.05207	0.927207	-2.31367	-3.44673	-1.61883	0.067317	-0.91245	-1.57783	0.766084	-1.16688			0.5124	0.516807	0.345669	3.17626	-0.921312	-0.915941	1.88074	1.60175	1.7608	4.73263	0.535308	0.450929	4.63222
1.104	1.51718	-0.46719	-0.01976	0.943172	-2.14312	-3.42285	-1.87964	0.006987	-0.79754	-1.53532	0.709592	-1.3154			0.5368	1.12821	0.687457	3.6487	-0.844304	-0.463594	2.1282	1.60554	2.08927	5.17982	0.828978	-0.0461377	4.89727
1.128	1.44956	-0.55908	0.014638	0.99027	-1.98083	-3.41023	-2.13033	-0.04804	-0.63378	-1.48426	0.699316	-1.42356			0.5612	2.02853	1.06658	4.0578	-0.658427	0.171532	2.50608	1.58212	2.55445	5.68507	1.19593	-0.436747	5.15055
1.152	1.38843	-0.65554	0.039013	1.08233	-1.83621	-3.40579	-2.35333	-0.0804	-0.43009	-1.43711	0.72654	-1.45895			0.5856	3.20486	1.46607	4.30201	-0.357429	0.98251	3.05612	1.52689	3.13938	6.2898	1.67619	-0.662427	5.39695
1.176	1.34049	-0.75138	0.045024	1.21856	-1.72288	-3.40172	-2.54226	-0.07145	-0.19617	-1.40273	0.781803	-1.40903			0.61	4.59756	1.87456	4.29192	0.0559254	1.92866	3.79162	1.43671	3.8086	7.00591	2.28517	-0.677376	5.64359
1.2	1.31284	-0.84374	0.030425	1.39142	-1.65369	-3.39707	-2.69981	-0.01095	0.059982	-1.38522	0.852471	-1.28502			0.6344	6.10764	2.2854	3.98241	0.563719	2.94596	4.68741	1.32971	4.51366	7.80678	3.00803	-0.46428	5.8954
1.224	1.3094	-0.9319	-0.00142	1.59638	-1.63143	-3.40139	-2.8282	0.096966	0.327997	-1.38276	0.915929	-1.11475			0.6588	7.61297	2.69556	3.41132	1.12665	3.96483	5.68956	1.24883	5.20873	8.63627	3.79196	-0.0323475	6.13993
1.248	1.33054	-1.01585	-0.04352	1.82822	-1.64796	-3.42782	-2.92319	0.236965	0.588034	-1.39003	0.944345	-0.93583			0.6832	9.00628	3.10318	2.70881	1.68985	4.92869	6.73629	1.24555	5.85735	9.42542	4.54687	0.603927	6.3453
1.272	1.37763	-1.09426	-0.0881	2.07139	-1.69072	-3.48151	-2.97762	0.392043	0.810522	-1.40147	0.919655	-0.78203			0.7076	10.2362	3.50354	2.04573	2.20033	5.81034	7.77693	1.36271	6.42901	10.1113	5.17592	1.43472	6.4812
1.296	1.45271	-1.1642	-0.12829	2.29941	-1.74737	-3.55322	-2.98928	0.55329	0.966956	-1.41126	0.83918	-0.6692			0.732	11.3079	3.88839	1.55908	2.6211	6.61483	8.78118	1.62151	6.90325	10.6564	5.6189	2.4372	6.53787
1.32	1.55375	-1.22265	-0.15744	2.48555	-1.80518	-3.62392	-2.96221	0.722582	1.04455	-1.41428	0.709178	-0.59167			0.7564	12.2528	4.24885	1.31824	2.93569	7.36239	9.73785	2.01593	7.28286	11.0628	5.8726	3.55849	6.52011
1.344	1.67512	-1.26806	-0.16882	2.61443	-1.8493	-3.67729	-2.90272	0.902922	1.05234	-1.40839	0.542596	-0.5304			0.7808	13.1069	4.57657	1.33518	3.14672	8.06888	10.6512	2.51759	7.59571	11.375	5.9814	4.72177	6.43248
1.368	1.81014	-1.29997	-0.15865	2.68509	-1.86701	-3.71004	-2.81791	1.08873	1.01507	-1.39301	0.363378	-0.47089			0.8052	13.9057	4.8627	1.5803	3.26945	8.73813	11.5343	3.08538	7.87364	11.6652	6.01191	5.84118	6.28361
1.392	1.95131	-1.31663	-0.12899	2.70847	-1.8528	-3.73153	-2.71572	1.27219	0.96263	-1.36744	0.202588	-0.41308			0.8296	14.6776	5.09892	1.99376	3.32114	9.36281	12.3935	3.67532	8.12861	12.0037	6.02727	6.8384	6.1003
1.416	2.09194	-1.31306	-0.087	2.70088	-1.80473	-3.75392	-2.60222	1.45454	0.919007	-1.33351	0.08913	-0.35969			0.854	15.4342	5.28065	2.51001	3.31305	9.93422	13.2133	4.25154	8.35009	12.431	6.06978	7.66812	5.92159
1.44	2.22916	-1.28211	-0.04121	2.67294	-1.7204	-3.78239	-2.4794	1.64585	0.893793	-1.29498	0.047887	-0.30147			0.8784	16.1662	5.40873	3.08527	3.25091	10.4551	13.9585	4.79401	8.5198	12.9434	6.14954	8.33682	5.77645
1.464	2.36517	-1.21776	0.0019	2.62387	-1.60147	-3.81425	-2.3492	1.85602	0.885821	-1.25323	0.100207	-0.22077			0.9028	16.8478	5.48883	3.70102	3.14075	10.9377	14.5896	5.29591	8.62461	13.4987	6.24305	8.88819	5.67142
															0.9272	17.4426	5.52901	4.35043	2.99255	11.3921	15.0776	5.75603	8.65811	14.0372	6.31343	9.36155	5.59175
															0.9516	17.9135	5.5375	5.02718	2.81852	11.8219	15.4102	6.17298	8.61666	14.5052	6.34066	9.76672	5.5112
															0.976	18.236	5.52304	5.71906	2.62989	12.2296	15.59	6.53989	8.49815	14.867	6.33227	10.0956	5.40966
															1.0004	18.4082	5.49548	6.4053	2.43824	12.617	15.6315	6.84353	8.304	15.1045	6.30813	10.3407	5.28093
															1.0248	18.4455	5.4643	7.05946	2.25883	12.9805	15.5599	7.07137	8.04133	15.2143	6.28249	10.4982	5.12726
															1.0492	18.3685	5.43674	7.65421	2.1089	13.3099	15.4093	7.21931	7.72493	15.2065	6.26086	10.5673	4.96126
															1.0736	18.1975	5.41726	8.16483	2.00361	13.5934	15.2138	7.29097	7.37799	15.0989	6.24618	10.5585	4.80674
															1.098	17.951	5.40762	8.57295	1.95505	13.8226	14.9974	7.2919	7.02858	14.9089	6.24243	10.4985	4.68397
															1.1224	17.6479	5.4075	8.87209	1.96973	13.9897	14.7692	7.22874	6.70267	14.6526	6.25417	10.4218	4.59598
															1.1468	17.3117	5.41542	9.07001	2.04503	14.0848	14.5255	7.10962	6.41846	14.3518	6.28471	10.3606	4.53119
															1.1712	16.966	5.42933	9.18313	2.16948	14.1012	14.2565	6.94102	6.18128	14.0365	6.33424	10.3326	4.47698
															1.1956	16.6254	5.4475	9.22773	2.32495	14.0395	13.9556	6.72851	5.98329	13.7371	6.39931	10.3312	4.42767
															1.22	16.2939	5.46988	9.21367	2.49176	13.904	13.6231	6.48187	5.81229	13.4725	6.47536	10.3335	4.37863
															1.2444	15.9707	5.49627	9.14739	2.65429	13.6953	13.2638	6.21557	5.65722	13.2461	6.56035	10.3148	4.31744
															1.2688	15.6514	5.5225	9.04376	2.79839	13.4079	12.8832	5.94283	5.50667	13.0479	6.65553	10.2569	4.22218
															1.2932	15.3304	5.5419	8.92961	2.90494	13.0385	12.489	5.67155	5.35232	12.8592	6.76265	10.1514	4.07066
															1.3176	15.0071	5.55118	8.83082	2.9537	12.5961	12.0935	5.40627	5.1942	12.6618	6.87981	9.99611	3.85411
															1.342	14.6852	5.55209	8.75804	2.93594	12.1054	11.7128	5.15186	5.03735	12.447	6.99963	9.78454	3.57946
															1.3664	14.3702	5.54747	8.7044	2.8595	11.6019	11.3612	4.91587	4.88406	12.2155	7.11112	9.51218	3.26224
															1.3908	14.0697	5.53787	8.6528	2.73969	11.1237	11.042	4.70711	4.7319	11.9705	7.20298	9.19219	2.92114
															1.4152	13.7966	5.52104	8.58706	2.58826	10.7015	10.7433	4.53211	4.57732	11.7138	7.26675	8.85248	2.57906
															1.4396	13.5679	5.49232	8.50117	2.41258	10.3515	10.4479	4.39608	4.41559	11.4454	7.3001	8.51775	2.26737
															1.464	13.3996	5.44668	8.39605	2.22419	10.078	10.1488	4.30615	4.23878	11.1659	7.30846	8.19877	2.01833
															1.4884	13.3026	5.38256	8.26821	2.04405	9.87799	9.85681	4.27024	4.04175	10.8771	7.29999	7.88886	1.84968
															1.5128	13.2814	5.3029	8.10791	1.8972	9.7425	9.59509	4.29266	3.83127	10.5842	7.27615	7.56607	1.76486
															1.5372	13.335	5.21243	7.90905	1.80114	9.65643	9.38512	4.36912	3.62617	10.2959	7.22822	7.20851	1.76178
															1.5616	13.4583	5.11486	7.67813	1.75547	9.60255	9.2332	4.48411	3.44899	10.0231	7.14647	6.80739	1.83361
															1.586	13.6407	5.01082	7.43042	1.74198	9.56595	9.12944	4.61283	3.3182	9.77587	7.03243	6.36137	1.96704
															1.6104	13.8644	4.89813	7.17768	1.73712	9.53416	9.05846	4.72821	3.2436	9.56259	6.90045	5.8704	2.14191
															1.6348	14.1028	4.77531	6.92374	1.72354	9.49653	9.01064	4.81032	3.223	9.39157	6.76846	5.34084	2.33495
															1.6592	14.3238	4.64492	6.66957	1.69198	9.44485	8.98591	4.85079	3.23954	9.27299	6.64924	4.78968	2.53055
															1.6836	14.4973	4.51226	6.4194	1.64047	9.37365	8.9869	4.85064	3.26176	9.2145	6.54784	4.2454	2.72864
															1.708	14.6042	4.38133	6.18371	1.57404	9.28036	9.00786	4.81759	3.25354	9.21316	6.464	3.74268	2.93541
															1.7324	14.6363	4.25303	5.97679	1.50149	9.16388	9.03371	4.76449	3.19079	9.2538	6.398	3.31434	3.14135
															1.7568	14.5892	4.12725	5.81187	1.43039	9.0229	9.0513	4.70665	3.0709	9.31725	6.35526	2.99522	3.31736
															1.7812	14.4593	4.00584	5.69579	1.36354	8.85589	9.0595	4.65899	2.9114	9.39008	6.34376	2.82803	3.43762
															1.8056	14.2488	3.89247	5.62578	1.30025	8.66265	9.07011	4.63252	2.74349	9.46726	6.37011	2.84985	3.50005
															1.83	13.9711	3.79097	5.59166	1.24141	8.44872	9.10045	4.63201	2.60404	9.54864	6.44069	3.06762	3.5276
															1.8544	13.65	3.70514	5.58325	1.19124	8.22774	9.16335	4.65954	2.52904	9.63344	6.56048	3.45353	3.55427
															1.8788	13.3147	3.63924	5.59791	1.15357	8.01634	9.2629	4.71678	2.54654	9.71805	6.72789	3.96498	3.60572
															1.9032	12.9954	3.59734	5.63731	1.12835	7.82822	9.39871	4.80026	2.6643	9.80085	6.9359	4.55685	3.68913
															1.9276	12.7179	3.58078	5.69391	1.11213	7.67387	9.57255	4.8991	2.86464	9.8888	7.17799	5.17609	3.79838
															1.952	12.5034	3.58671	5.74839	1.1022	7.56227	9.7917	5.00016	3.11975	9.99429	7.45156	5.76947	3.92409
															1.9764	12.3731	3.6107	5.7814	1.09976	7.50106	10.066	5.09246	3.41103	10.1226	7.75779	6.3004	4.05832
															2.0008	12.3462	3.64902	5.77992	1.10875	7.49576	10.3989	5.16726	3.72969	10.2639	8.09693	6.74179	4.19638
															2.0252	12.4307	3.69728	5.73742	1.13357	7.54889	10.7798	5.21794	4.06571	10.3947	8.46006	7.06683	4.33835
															2.0496	12.6143	3.74933	5.65715	1.17802	7.66024	11.1858	5.24127	4.40593	10.4848	8.82448	7.26639	4.48667
															2.074	12.8599	3.79894	5.55467	1.2428	7.82776	11.5902	5.23767	4.74104	10.5074	9.15983	7.36457	4.64055
															2.0984	13.1111	3.84227	5.45567	1.3223	8.04634	11.9703	5.21107	5.06385	10.452	9.44159	7.40786	4.79022
															2.1228	13.31	3.87851	5.39132	1.40391	8.30385	12.3142	5.1679	5.35976	10.3302	9.66078	7.43631	4.91795
															2.1472	13.4168	3.90846	5.38963	1.47151	8.57708	12.6223	5.11326	5.60908	10.1657	9.82306	7.45597	5.01147
															2.1716	13.4138	3.93363	5.46447	1.51304	8.83308	12.8996	5.04818	5.79996	9.97568	9.93994	7.43614	5.07192
															2.196	13.2945	3.95606	5.61157	1.52543	9.03788	13.1436	4.97136	5.933	9.76248	10.0189	7.342	5.10126
															2.2204	13.0527	3.97747	5.8147	1.51253	9.16566	13.3397	4.88202	6.01381	9.52261	10.0599	7.16905	5.09368
															2.2448	12.6903	3.99824	6.05443	1.48297	9.20384	13.4692	4.78204	6.04652	9.26028	10.0601	6.93717	5.04642
															2.2692	12.2337	4.01727	6.31406	1.4496	9.15548	13.5183	4.67745	6.03595	8.99308	10.0201	6.66598	4.96779
															2.2936	11.7358	4.03235	6.58077	1.42495	9.03762	13.4827	4.57684	5.9909	8.74841	9.94851	6.37145	4.87152
															2.318	11.2606	4.04017	6.84086	1.41548	8.87509	13.3689	4.48835	5.92019	8.55553	9.8629	6.06942	4.76853
															2.3424	10.8607	4.03772	7.07726	1.42045	8.69451	13.1918	4.41906	5.82899	8.43847	9.78467	5.77509	4.66751
															2.3668	10.5597	4.02506	7.27647	1.43407	8.51953	12.9708	4.37496	5.72094	8.41483	9.72843	5.50863	4.58225
															2.3912	10.3491	4.00545	7.43583	1.45024	8.36677	12.7318	4.35773	5.59896	8.49814	9.69609	5.29074	4.52763
															2.4156	10.1981	3.98249	7.56081	1.46832	8.24381	12.5054	4.36042	5.4641	8.69528	9.68066	5.12628	4.50884
															2.44	10.074	3.95835	7.65753	1.49084	8.15125	12.319	4.36853	5.31669	8.99858	9.67236	5.00379	4.52198
															2.4644	9.95935	3.93436	7.73011	1.51455	8.08828	12.1892	4.36946	5.15889	9.38187	9.65916	4.90862	4.5568
															2.4888	9.8528	3.91128	7.77921	1.52957	8.05473	12.1245	4.36077	4.99637	9.80727	9.62638	4.83073	4.59308
															2.5132	9.7514	3.88886	7.79989	1.52702	8.0451	12.1331	4.34798	4.83495	10.2401	9.56419	4.76342	4.6032
															2.5376	9.63552	3.86607	7.787	1.50466	8.04323	12.2267	4.33609	4.67443	10.6612	9.47939	4.70118	4.56461
															2.562	9.47012	3.84197	7.74382	1.46597	8.02753	12.4199	4.32306	4.50852	11.0671	9.39951	4.63808	4.46542
															2.5864	9.22018	3.81716	7.68179	1.41677	7.98286	12.7249	4.3	4.33134	11.4582	9.36295	4.56665	4.30027
															2.6108	8.86935	3.79545	7.61215	1.36427	7.90762	13.1432	4.25767	4.14331	11.8246	9.40124	4.48786	4.07395
															2.6352	8.426	3.7837	7.53885	1.31514	7.80972	13.6615	4.19316	3.95151	12.1417	9.52487	4.42364	3.81107
															2.6596	7.91449	3.78935	7.45737	1.27149	7.69957	14.2558	4.11007	3.7646	12.3798	9.71593	4.41106	3.5523
															2.684	7.36878	3.81619	7.35886	1.23203	7.59017	14.9052	4.0149	3.58818	12.5171	9.92864	4.48474	3.33455
															2.7084	6.8337	3.86078	7.23584	1.19729	7.49963	15.5982	3.91403	3.42484	12.5507	10.106	4.66242	3.17427
															2.7328	6.35836	3.91344	7.08411	1.1708	7.45165	16.3266	3.81197	3.27822	12.4995	10.2095	4.94011	3.07201
															2.7572	5.98182	3.96344	6.90184	1.15473	7.47473	17.0737	3.71129	3.15835	12.393	10.2359	5.29845	3.02943
															2.7816	5.72599	4.00333	6.68915	1.14701	7.59642	17.8119	3.61175	3.08061	12.2569	10.2062	5.71066	3.05631
															2.806	5.59489	4.03088	6.44851	1.14377	7.83301	18.5101	3.51017	3.05507	12.1107	10.1425	6.14919	3.16096
															2.8304	5.57418	4.04886	6.18931	1.14281	8.17998	19.1497	3.40537	3.07681	11.9704	10.0538	6.59608	3.3381
															2.8548	5.63525	4.06428	5.93479	1.14311	8.60953	19.7334	3.30187	3.12975	11.8522	9.93958	7.04263	3.56589
															2.8792	5.74528	4.08728	5.71838	1.14063	9.08015	20.2797	3.20571	3.20299	11.7731	9.79945	7.4715	3.80663
															2.9036	5.87697	4.12729	5.56995	1.12458	9.55194	20.8075	3.12002	3.29999	11.7469	9.63878	7.85176	4.01042
															2.928	6.01235	4.18781	5.5089	1.08041	9.99388	21.3273	3.04533	3.4292	11.7757	9.46848	8.15889	4.13003
															2.9524	6.14044	4.26433	5.54988	0.999963	10.3801	21.8415	2.97793	3.59199	11.8477	9.30158	8.38949	4.14001
															2.9768	6.25137	4.34681	5.70511	0.889226	10.6868	22.3516	2.90734	3.78284	11.9451	9.14841	8.55432	4.04205
															3.0012	6.33252	4.42408	5.97469	0.766561	10.8975	22.8558	2.82053	3.99845	12.0525	9.01328	8.66662	3.85223
															3.0256	6.37187	4.4867	6.33822	0.653826	11.0125	23.3427	2.70937	4.24066	12.1592	8.89353	8.7412	3.59244
															3.05	6.36438	4.52772	6.76077	0.5673	11.0517	23.7934	2.57322	4.50512	12.2588	8.781	8.79662	3.29923
															3.0744	6.31286	4.5436	7.2068	0.512771	11.0416	24.1925	2.41636	4.77257	12.3442	8.6654	8.8485	3.02478
															3.0988	6.22565	4.53533	7.64509	0.48724	10.9963	24.5366	2.24793	5.01657	12.4065	8.53752	8.90259	2.81338
															3.1232	6.11661	4.50888	8.04688	0.484886	10.9165	24.8363	2.08464	5.21655	12.4377	8.38995	8.95757	2.67382
															3.1476	6.00203	4.47414	8.39123	0.499574	10.8015	25.1087	1.94669	5.36214	12.4353	8.21733	9.01105	2.57693
															3.172	5.89286	4.44159	8.67342	0.521955	10.6591	25.3677	1.84945	5.44906	12.4029	8.01832	9.06251	2.48318
															3.1964	5.79185	4.4183	8.90345	0.539027	10.5056	25.6179	1.80066	5.4774	12.3463	7.79801	9.11571	2.36735
															3.2208	5.69769	4.40752	9.09222	0.540681	10.3601	25.8562	1.80062	5.45467	12.2693	7.5681	9.18408	2.21787
															3.2452	5.60867	4.41061	9.2369	0.524866	10.2387	26.0749	1.84393	5.39473	12.1719	7.34343	9.28881	2.03326
															3.2696	5.52455	4.42764	9.32047	0.494447	10.1518	26.2636	1.92322	5.31492	12.055	7.136	9.44421	1.82814
															3.294	5.44904	4.45678	9.32673	0.452286	10.1054	26.4109	2.0302	5.23596	11.925	6.9513	9.65193	1.62859
															3.3184	5.39	4.49392	9.25643	0.40075	10.1037	26.5088	2.15731	5.1799	11.7918	6.78777	9.90973	1.45784
															3.3428	5.35569	4.53301	9.12916	0.343378	10.1493	26.5564	2.29806	5.16791	11.663	6.63845	10.2175	1.33125
															3.3672	5.35192	4.56786	8.97077	0.28558	10.2422	26.562	2.44142	5.21815	11.5367	6.49628	10.5708	1.25569
															3.3916	5.38301	4.59439	8.80131	0.233727	10.3805	26.54	2.57106	5.33795	11.4008	6.362	10.9465	1.22592
															3.416	5.45102	4.6112	8.63511	0.192879	10.5579	26.5046	2.67439	5.51746	11.2415	6.24822	11.3	1.22311
															3.4404	5.55259	4.61788	8.48596	0.165183	10.7583	26.4633	2.74841	5.73567	11.0499	6.17413	11.5881	1.22255
															3.4648	5.68085	4.61269	8.36696	0.151567	10.9568	26.4113	2.79702	5.97252	10.8248	6.15286	11.7996	1.20948
															3.4892	5.83092	4.59278	8.28906	0.153833	11.1282	26.3329	2.8284	6.21434	10.5715	6.18077	11.9578	1.18368
															3.5136	5.99986	4.55715	8.26397	0.173068	11.2547	26.2099	2.85469	6.45101	10.2986	6.23784	12.0904	1.1454
															3.538	6.18283	4.50837	8.30461	0.207864	11.3299	26.0309	2.88703	6.6725	10.0143	6.29908	12.2025	1.08605
															3.5624	6.37298	4.45283	8.41931	0.254601	11.3579	25.7956	2.92974	6.86739	9.72709	6.34501	12.2818	0.997757
															3.5868	6.56406	4.3991	8.6057	0.306511	11.3496	25.5138	2.98099	7.02191	9.44932	6.36436	12.3186	0.886817
															3.6112	6.75198	4.35437	8.84834	0.353824	11.3197	25.198	3.03461	7.12175	9.19536	6.35453	12.3127	0.767796
															3.6356	6.93216	4.32343	9.12555	0.388496	11.2813	24.8583	3.07948	7.15787	8.97255	6.32239	12.2713	0.649236
															3.66	7.09466	4.31067	9.42271	0.407827	11.2438	24.5024	3.10152	7.13223	8.77764	6.28201	12.1993	0.534211
															3.6844	7.22429	4.31819	9.73553	0.414233	11.2152	24.1374	3.0906	7.05706	8.60411	6.24859	12.0917	0.423858
															3.7088	7.30655	4.34222	10.0612	0.415679	11.2	23.7696	3.04614	6.94817	8.44932	6.23159	11.9386	0.317212
															3.7332	7.33254	4.37503	10.3901	0.42466	11.1967	23.4013	2.97347	6.81812	8.313	6.23266	11.7361	0.218188
															3.7576	7.30126	4.41002	10.7047	0.450896	11.1976	23.031	2.87816	6.67293	8.19371	6.24842	11.4884	0.13874
															3.782	7.22158	4.44318	10.9841	0.494405	11.1916	22.6589	2.76895	6.51479	8.0886	6.27147	11.2069	0.0883752
															3.8064	7.1102	4.47079	11.2126	0.549556	11.1642	22.2904	2.6632	6.34781	7.9936	6.2875	10.9083	0.0656687
															3.8308	6.98267	4.48799	11.3853	0.613746	11.0969	21.9331	2.58294	6.1791	7.9018	6.27463	10.6047	0.0643274
															3.8552	6.8455	4.49068	11.5086	0.686187	10.972	21.5919	2.54415	6.01408	7.8038	6.21265	10.2951	0.0800611
															3.8796	6.69672	4.47822	11.5962	0.761914	10.7806	21.2642	2.5495	5.85144	7.69276	6.09803	9.97738	0.105612
															3.904	6.53422	4.45349	11.6638	0.833522	10.5287	20.9401	2.58634	5.68247	7.57029	5.94816	9.66167	0.130995
															3.9284	6.36383	4.42046	11.7294	0.894946	10.2374	20.6108	2.62869	5.49611	7.44632	5.78957	9.36664	0.157288
															3.9528	6.19864	4.38228	11.8092	0.940186	9.93384	20.2753	2.64821	5.28557	7.33105	5.64244	9.1118	0.197945
															3.9772	6.05238	4.34252	11.9116	0.96412	9.64259	19.9407	2.63008	5.05281	7.22785	5.51227	8.91994	0.261326
															4.0016	5.93577	4.30707	12.0357	0.967378	9.38323	19.6172	2.5783	4.8101	7.13428	5.39234	8.81675	0.343188
															4.026	5.85563	4.28214	12.17	0.958356	9.17074	19.3107	2.5068	4.57762	7.04873	5.27207	8.81568	0.434254
															4.0504	5.81357	4.2706	12.2936	0.950706	9.01112	19.0199	2.42793	4.37736	6.97527	5.14443	8.89409	0.524474
															4.0748	5.80697	4.2708	12.3844	0.956686	8.89763	18.7402	2.34713	4.22569	6.92144	5.0095	8.98342	0.602604
															4.0992	5.83294	4.27819	12.4257	0.980059	8.81264	18.471	2.26377	4.1294	6.89288	4.8722	8.98933	0.655133
															4.1236	5.89093	4.28666	12.4066	1.01641	8.7342	18.2175	2.17705	4.08782	6.89177	4.73508	8.83292	0.664192
															4.148	5.98134	4.2899	12.3259	1.05813	8.64334	17.9856	2.09188	4.09294	6.91869	4.59433	8.48346	0.612135
															4.1724	6.10213	4.28316	12.1962	1.09678	8.52845	17.7763	2.01855	4.1266	6.97406	4.44533	7.95498	0.49493
															4.1968	6.2462	4.26401	12.0375	1.12452	8.3855	17.5876	1.96752	4.16284	7.05834	4.29147	7.28387	0.327013
															4.2212	6.40195	4.23214	11.8698	1.13576	8.2158	17.4211	1.94366	4.17593	7.16884	4.14515	6.52759	0.127603
															4.2456	6.55574	4.18996	11.7138	1.12762	8.0253	17.2845	1.94476	4.15146	7.29546	4.01895	5.77228	-0.090656
															4.27	6.6937	4.14181	11.5867	1.09923	7.82303	17.1848	1.96423	4.09292	7.42259	3.91577	5.11563	-0.311927
															4.2944	6.80452	4.0919	11.4987	1.05045	7.61765	17.1167	1.99203	4.01659	7.5361	3.82785	4.63409	-0.507014
															4.3188	6.88419	4.04437	11.4487	0.981462	7.41717	17.0581	2.01318	3.9404	7.62912	3.74396	4.36473	-0.64913
															4.3432	6.93777	4.004	11.4218	0.894887	7.2286	16.9792	2.00857	3.87561	7.70453	3.65732	4.31237	-0.738394
															4.3676	6.97479	3.97489	11.3913	0.798884	7.05366	16.8619	1.96253	3.82344	7.77301	3.56952	4.4611	-0.79948
															4.392	7.00264	3.95896	11.3307	0.706296	6.88729	16.7109	1.87312	3.7758	7.84358	3.48811	4.77427	-0.851579
															4.4164	7.02379	3.95537	11.2251	0.629502	6.72206	16.546	1.75341	3.72242	7.91567	3.41881	5.20157	-0.891815
															4.4408	7.03816	3.96028	11.0758	0.576232	6.55253	16.387	1.62074	3.66321	7.98265	3.35996	5.70062	-0.917533
															4.4652	7.04822	3.96767	10.8929	0.546577	6.37587	16.2403	1.48806	3.61257	8.03868	3.30493	6.24635	-0.947386
															4.4896	7.06146	3.97214	10.6838	0.530664	6.19165	16.0975	1.36522	3.588	8.07999	3.2477	6.81671	-1.00249
															4.514	7.08736	3.97106	10.4477	0.512273	6.00264	15.9461	1.2612	3.59536	8.10446	3.18479	7.38119	-1.07881
															4.5384	7.13294	3.96368	10.1795	0.478461	5.81488	15.7814	1.18175	3.62566	8.11149	3.11585	7.90943	-1.15188
															4.5628	7.2	3.95017	9.87748	0.427796	5.63531	15.6091	1.12842	3.66372	8.09967	3.04519	8.38239	-1.20293
															4.5872	7.28172	3.93318	9.54685	0.37055	5.46656	15.438	1.10147	3.69671	8.06451	2.97709	8.79213	-1.23418
															4.6116	7.36249	3.91768	9.19584	0.320336	5.30487	15.2758	1.10209	3.71472	7.99967	2.90777	9.14076	-1.26112
															4.636	7.42496	3.9075	8.83132	0.284753	5.14625	15.1289	1.13027	3.709	7.90167	2.82749	9.4453	-1.29438
															4.6604	7.45696	3.90406	8.45831	0.261729	4.99276	15.0061	1.17986	3.67237	7.77387	2.73046	9.73429	-1.3338
															4.6848	7.45343	3.90855	8.08402	0.241781	4.85008	14.9193	1.23718	3.6014	7.62518	2.61942	10.0286	-1.374
															4.7092	7.41677	3.92304	7.72176	0.21492	4.72024	14.8773	1.28665	3.49965	7.46433	2.50318	10.3295	-1.41139
															4.7336	7.35503	3.94937	7.39066	0.178458	4.59852	14.878	1.31789	3.37969	7.29699	2.39212	10.631	-1.45253
															4.758	7.27557	3.98756	7.11179	0.13869	4.4777	14.9111	1.3275	3.26248	7.12868	2.29347	10.9312	-1.5145
															4.7824	7.18083	4.03588	6.902	0.104642	4.35386	14.966	1.31677	3.16883	6.96822	2.21006	11.2309	-1.61323
															4.8068	7.07096	4.09266	6.77257	0.0824906	4.22866	15.0348	1.29162	3.10336	6.82642	2.1431	11.5301	-1.75078
															4.8312	6.9476	4.1568	6.73325	0.0777723	4.10961	15.1101	1.26091	3.04998	6.71027	2.09195	11.8255	-1.90788
															4.8556	6.81346	4.22589	6.79074	0.0973294	4.00755	15.1821	1.2295	2.98659	6.6172	2.05136	12.1066	-2.04779
															4.88	6.66998	4.2953	6.94161	0.143107	3.93026	15.2365	1.19662	2.90025	6.53642	2.01359	12.3551	-2.1336
															4.9044	6.5167	4.36015	7.16925	0.207842	3.87832	15.2554	1.16233	2.79187	6.45746	1.97415	12.553	-2.14706
															4.9288	6.35375	4.41794	7.44896	0.281306	3.84623	15.2218	1.12914	2.6721	6.37616	1.93504	12.6956	-2.09154
															4.9532	6.18404	4.46964	7.75747	0.356324	3.82517	15.129	1.09828	2.55063	6.29375	1.90438	12.7946	-1.9845
															4.9776	6.01153	4.51781	8.07436	0.425856	3.80617	14.9842	1.06915	2.43045	6.21439	1.89344	12.8687	-1.85414
															5.002	5.84067	4.56273	8.37766	0.480441	3.78312	14.8019	1.0394	2.31391	6.14306	1.91093	12.9372	-1.73268

## Sheet: Figure4-supplement 3
							Cue															Action + reward										footshock
Session	Session 1	Session 1	Session 1	Session 1	Session 2	Session 2	Session 2	Session 2	Session 3	Session 3	Session 3	footshock average	footshock average	footshock average	footshock average		Session	Session 1	Session 1	Session 1	Session 1	Session 2	Session 2	Session 2	Session 2	Session 3	Session 3	Session 3		Session	Average of sessions	Average of sessions	Average of sessions	Average of sessions
Subject	S257	S283	S318	S321	S257	S283	S318	S321	S257	S318	S321	S257	S283	S318	S321		Subject	S257	S283	S318	S321	S257	S283	S318	S321	S257	S318	S321		Subject	S257	S283	S318	S321
	z-score of df/f	z-score of df/f	z-score of df/f	z-score of df/f	z-score of df/f	z-score of df/f	z-score of df/f	z-score of df/f	z-score of df/f	z-score of df/f	z-score of df/f	z-score of df/f	z-score of df/f	z-score of df/f	z-score of df/f			z-score of df/f	z-score of df/f	z-score of df/f	z-score of df/f	z-score of df/f	z-score of df/f	z-score of df/f	z-score of df/f	z-score of df/f	z-score of df/f	z-score of df/f			z-score of df/f	z-score of df/f	z-score of df/f	z-score of df/f
																	Peri-action time - sec													Peri-action time - sec
-1.488	-0.07849	0.441074	0.19741	-0.11701	-0.83319	0.020376	-0.57527	-0.30459	0.003456	-0.02078	0.062489	-0.74908	0.021508	0.114011	0.530758		-2.0496	-0.20389	-0.12429	0.111664	0.228841	0.203851	-0.2178	-0.13709	-0.12521	-0.19383	-0.02291	0.238114		-2.0496	0.603158	0.276026	0.326372	-0.0462
-1.464	-0.03276	0.39779	0.229006	-0.11575	-0.81385	-0.00917	-0.59819	-0.28458	-0.01417	-0.02933	0.012121	-0.61923	-0.01874	0.044725	0.569192		-2.0252	-0.1379	-0.13176	0.144161	0.280028	0.199163	-0.31706	-0.12996	-0.08325	-0.21851	-0.12886	0.246567		-2.0252	0.602523	0.260788	0.34546	-0.07373
-1.44	0.040927	0.349697	0.235306	-0.11361	-0.78214	-0.00401	-0.63386	-0.25457	-0.0533	-0.01989	-0.04284	-0.43023	-0.08286	-0.02289	0.59477		-2.0008	-0.0663	-0.15596	0.162684	0.30538	0.171999	-0.3841	-0.11228	-0.02961	-0.20462	-0.22257	0.23402		-2.0008	0.58475	0.2392	0.367662	-0.09225
-1.416	0.12093	0.29114	0.207781	-0.10726	-0.73963	0.020063	-0.67331	-0.22296	-0.11283	0.00122	-0.09995	-0.20148	-0.14118	-0.06598	0.623064		-1.9764	0.000327	-0.19109	0.16916	0.310457	0.127659	-0.41173	-0.08409	0.022336	-0.14773	-0.2917	0.212323		-1.9764	0.548534	0.196101	0.391692	-0.10995
-1.392	0.183279	0.227442	0.153947	-0.09181	-0.68576	0.047582	-0.70684	-0.20073	-0.18433	0.027865	-0.15387	0.048701	-0.16021	-0.0706	0.662954		-1.952	0.057501	-0.22649	0.167933	0.308884	0.074287	-0.40528	-0.05158	0.06928	-0.05465	-0.32979	0.186165		-1.952	0.485817	0.111705	0.407844	-0.14131
-1.368	0.216035	0.170372	0.089931	-0.06336	-0.61914	0.075333	-0.72887	-0.18837	-0.25334	0.054775	-0.1996	0.297757	-0.11649	-0.03825	0.709495		-1.9276	0.104193	-0.25268	0.164315	0.307265	0.02054	-0.37536	-0.02224	0.115645	0.057869	-0.33648	0.147313		-1.9276	0.383088	-0.01727	0.399081	-0.19152
-1.344	0.224486	0.130922	0.029467	-0.02047	-0.54007	0.111521	-0.73785	-0.17335	-0.30598	0.078306	-0.23297	0.513155	-0.00998	0.018465	0.750189		-1.9032	0.13443	-0.26821	0.162129	0.300423	-0.02698	-0.33249	0.000475	0.161238	0.171291	-0.32101	0.084988		-1.9032	0.235801	-0.16892	0.356082	-0.25123
-1.32	0.221125	0.118985	-0.02127	0.03321	-0.45394	0.165178	-0.73498	-0.1415	-0.33146	0.098095	-0.25079	0.652846	0.133563	0.08511	0.770595		-1.8788	0.139515	-0.28226	0.161361	0.281439	-0.06384	-0.28828	0.018288	0.19692	0.269933	-0.29997	-0.00074		-1.8788	0.060158	-0.31153	0.286153	-0.30121
-1.296	0.210684	0.140744	-0.06202	0.083759	-0.3718	0.239468	-0.7222	-0.08585	-0.32215	0.114843	-0.25364	0.678602	0.276402	0.147707	0.757332		-1.8544	0.117247	-0.30987	0.159248	0.249579	-0.08525	-0.25136	0.034146	0.211784	0.34135	-0.28825	-0.09511		-1.8544	-0.10427	-0.42114	0.203239	-0.32536
-1.272	0.18765	0.190303	-0.0937	0.111452	-0.30653	0.330752	-0.70021	-0.00725	-0.27617	0.126387	-0.24607	0.574046	0.391099	0.190151	0.703506		-1.83	0.071178	-0.36139	0.152304	0.210074	-0.08455	-0.22026	0.048089	0.202563	0.378404	-0.2944	-0.17636		-1.83	-0.20831	-0.48572	0.114391	-0.32313
-1.248	0.147979	0.251208	-0.11401	0.10686	-0.26678	0.42885	-0.66869	0.086372	-0.20071	0.129078	-0.23455	0.359743	0.471485	0.196708	0.612555		-1.8056	0.004106	-0.43501	0.136277	0.171206	-0.0579	-0.18632	0.058646	0.175	0.380786	-0.32099	-0.22589		-1.8056	-0.22257	-0.50258	0.016066	-0.30733
-1.224	0.097394	0.310327	-0.11834	0.07568	-0.25345	0.52186	-0.6275	0.180723	-0.10942	0.121617	-0.22546	0.092452	0.524215	0.160221	0.498576		-1.7812	-0.08038	-0.52052	0.10752	0.139489	-0.0108	-0.14368	0.065614	0.137463	0.353457	-0.3633	-0.23228		-1.7812	-0.15341	-0.47764	-0.09912	-0.28913
-1.2	0.046192	0.364485	-0.10707	0.028611	-0.26373	0.602568	-0.57906	0.260284	-0.01435	0.10452	-0.22205	-0.1564	0.559879	0.088089	0.384401		-1.7568	-0.17056	-0.60658	0.065203	0.114134	0.045598	-0.09588	0.06852	0.097358	0.305251	-0.41069	-0.19094		-1.7568	-0.03124	-0.4272	-0.23085	-0.26451
-1.176	0.001683	0.414559	-0.08887	-0.02518	-0.29618	0.668303	-0.52978	0.315638	0.076493	0.078081	-0.2242	-0.3303	0.590701	0.000789	0.294529		-1.7324	-0.24785	-0.68139	0.012222	0.089339	0.104682	-0.05553	0.0661	0.063522	0.248279	-0.45297	-0.10524		-1.7324	0.109417	-0.37356	-0.36518	-0.21532
-1.152	-0.03173	0.45971	-0.07386	-0.07774	-0.34819	0.717944	-0.48728	0.341907	0.154007	0.043214	-0.23059	-0.41212	0.623937	-0.07915	0.244081		-1.708	-0.29822	-0.73337	-0.04303	0.064841	0.165993	-0.03857	0.058612	0.044337	0.194761	-0.48389	0.013199		-1.708	0.24379	-0.33306	-0.48052	-0.12721
-1.128	-0.05222	0.496622	-0.06658	-0.12114	-0.41235	0.751965	-0.45647	0.332272	0.205364	0.002633	-0.2376	-0.42534	0.655584	-0.14181	0.235338		-1.6836	-0.32038	-0.75747	-0.08593	0.048813	0.228393	-0.05482	0.046831	0.040389	0.151992	-0.50154	0.146363		-1.6836	0.363925	-0.30642	-0.55966	-0.00486
-1.104	-0.06349	0.522046	-0.06641	-0.14726	-0.47677	0.771725	-0.43816	0.281156	0.219976	-0.03743	-0.23975	-0.41172	0.674541	-0.19273	0.264979		-1.6592	-0.32191	-0.75615	-0.10077	0.048906	0.284872	-0.10105	0.029556	0.044447	0.123084	-0.50984	0.272353		-1.6592	0.475238	-0.27649	-0.59545	0.13369
-1.08	-0.07132	0.536648	-0.07217	-0.15133	-0.52944	0.776635	-0.42991	0.194072	0.19881	-0.06709	-0.23455	-0.41058	0.675757	-0.24157	0.328099		-1.6348	-0.30942	-0.73292	-0.07988	0.065505	0.322861	-0.16534	0.004824	0.048922	0.112043	-0.51507	0.373126		-1.6348	0.589209	-0.21458	-0.5898	0.271608
-1.056	-0.0759	0.54526	-0.08471	-0.13867	-0.56553	0.76533	-0.42846	0.090411	0.156815	-0.07983	-0.22264	-0.44684	0.668082	-0.29115	0.413152		-1.6104	-0.28629	-0.68981	-0.02794	0.092747	0.330846	-0.23669	-0.02716	0.050443	0.122128	-0.51714	0.440991		-1.6104	0.719504	-0.09705	-0.55365	0.394922
-1.032	-0.07122	0.553604	-0.10428	-0.12475	-0.58776	0.739199	-0.43199	-0.00383	0.11552	-0.07922	-0.20248	-0.51817	0.663248	-0.33655	0.501586		-1.586	-0.25866	-0.62972	0.042631	0.121905	0.306785	-0.30835	-0.0635	0.047381	0.149639	-0.50953	0.477794		-1.586	0.870223	0.075211	-0.50402	0.484963
-1.008	-0.05161	0.565314	-0.12699	-0.12412	-0.59955	0.701539	-0.43938	-0.06806	0.092322	-0.07639	-0.16774	-0.59262	0.659745	-0.37072	0.577767		-1.5616	-0.24011	-0.55886	0.117723	0.146375	0.258849	-0.37679	-0.10099	0.03578	0.183032	-0.48948	0.494539		-1.5616	1.01845	0.275787	-0.45372	0.523247
-0.984	-0.0166	0.578185	-0.14514	-0.1397	-0.60276	0.655286	-0.44857	-0.09674	0.094219	-0.08187	-0.11336	-0.635	0.646367	-0.39038	0.634813		-1.5372	-0.24792	-0.48824	0.183812	0.16816	0.198488	-0.43861	-0.13842	0.012763	0.208214	-0.46349	0.507446		-1.5372	1.12035	0.471874	-0.40483	0.506015
-0.96	0.0316	0.582729	-0.14867	-0.16263	-0.5993	0.603951	-0.45759	-0.09777	0.117828	-0.09891	-0.04386	-0.63347	0.618498	-0.39934	0.672951		-1.5128	-0.29145	-0.43026	0.232254	0.196878	0.135074	-0.4878	-0.17637	-0.01759	0.215695	-0.44168	0.525891		-1.5128	1.13608	0.640531	-0.35722	0.444835
-0.936	0.092806	0.569607	-0.12787	-0.18076	-0.58972	0.552147	-0.46512	-0.08182	0.153498	-0.1217	0.028606	-0.59078	0.583237	-0.40492	0.699088		-1.4884	-0.3627	-0.39029	0.263369	0.240227	0.075893	-0.52013	-0.2149	-0.04392	0.205035	-0.42964	0.547169		-1.4884	1.04214	0.77468	-0.31784	0.356169
-0.912	0.163701	0.538095	-0.0792	-0.18597	-0.57123	0.503394	-0.46984	-0.05508	0.189417	-0.13888	0.095452	-0.50579	0.552233	-0.41056	0.724316		-1.464	-0.44059	-0.36199	0.28277	0.298148	0.026721	-0.53725	-0.25188	-0.05177	0.183997	-0.42623	0.563324		-1.464	0.841826	0.879847	-0.29522	0.255111
-0.888	0.230759	0.494538	-0.00707	-0.1739	-0.53868	0.458667	-0.47118	-0.02012	0.215022	-0.14147	0.157691	-0.37754	0.534664	-0.41484	0.758304		-1.4396	-0.5084	-0.33123	0.294161	0.361885	-0.0094	-0.54092	-0.28372	-0.03302	0.163964	-0.42456	0.567053		-1.4396	0.575328	0.961441	-0.29156	0.153204
-0.864	0.277089	0.446476	0.08165	-0.14155	-0.48896	0.416419	-0.46952	0.018677	0.226107	-0.12952	0.218908	-0.21929	0.533765	-0.41589	0.806245		-1.4152	-0.56686	-0.28578	0.296678	0.412892	-0.03332	-0.52992	-0.30731	0.007458	0.154398	-0.41313	0.555278		-1.4152	0.300018	1.01775	-0.30452	0.063479
-0.84	0.295813	0.39792	0.180394	-0.08861	-0.42594	0.373992	-0.46402	0.051957	0.227151	-0.11147	0.276429	-0.05757	0.543724	-0.41199	0.86952		-1.3908	-0.62795	-0.22475	0.28777	0.429287	-0.05025	-0.50759	-0.32132	0.057937	0.15897	-0.38263	0.534324		-1.3908	0.060014	1.04791	-0.32868	0.003259
-0.816	0.294611	0.345171	0.281118	-0.0187	-0.36014	0.330646	-0.45255	0.06863	0.227716	-0.09712	0.323798	0.088132	0.547926	-0.39852	0.948559		-1.3664	-0.69811	-0.15822	0.26667	0.400676	-0.06688	-0.4827	-0.32647	0.108122	0.174908	-0.33554	0.517595		-1.3664	-0.12048	1.05993	-0.35244	-0.01934
-0.792	0.28961	0.280469	0.375422	0.062555	-0.30264	0.2896	-0.43559	0.063709	0.2367	-0.09219	0.358558	0.219468	0.524367	-0.37162	1.03835		-1.342	-0.76923	-0.09994	0.235051	0.334504	-0.08629	-0.45854	-0.32466	0.150294	0.193373	-0.28681	0.515016		-1.342	-0.23388	1.06502	-0.36137	-0.01449
-0.768	0.294546	0.202908	0.456826	0.149786	-0.2611	0.257207	-0.41802	0.044628	0.257595	-0.09869	0.384649	0.344333	0.455992	-0.33597	1.11928		-1.3176	-0.82607	-0.05997	0.195788	0.247849	-0.1068	-0.43021	-0.31659	0.177032	0.19995	-0.25422	0.525632		-1.3176	-0.2868	1.0682	-0.34836	0.002142
-0.744	0.312842	0.121277	0.519215	0.2399	-0.24174	0.239067	-0.40511	0.027295	0.287919	-0.11584	0.409642	0.457477	0.337529	-0.30181	1.1644		-1.2932	-0.86034	-0.03878	0.151875	0.156238	-0.12458	-0.39533	-0.30017	0.18128	0.180549	-0.24766	0.538639		-1.2932	-0.28915	1.06859	-0.31538	0.025084
-0.72	0.339552	0.045002	0.556556	0.333108	-0.25059	0.237172	-0.39763	0.024149	0.32533	-0.13938	0.440084	0.545191	0.176868	-0.27483	1.15867		-1.2688	-0.87524	-0.02946	0.106874	0.069621	-0.13449	-0.36072	-0.27301	0.163058	0.132028	-0.26433	0.541719		-1.2688	-0.24424	1.06592	-0.26423	0.056598
-0.696	0.369388	-0.0249	0.567175	0.429164	-0.28924	0.250852	-0.39133	0.039012	0.373842	-0.16389	0.474725	0.592589	-0.00644	-0.25403	1.10831		-1.2444	-0.88118	-0.02689	0.065754	-0.00472	-0.12896	-0.33646	-0.23785	0.134355	0.064321	-0.29204	0.528023		-1.2444	-0.15171	1.05845	-0.19232	0.092026
-0.672	0.399161	-0.0957	0.55562	0.521643	-0.3499	0.278321	-0.38136	0.07071	0.439555	-0.1858	0.502914	0.576589	-0.18388	-0.23784	1.03973		-1.22	-0.88819	-0.03319	0.034674	-0.06185	-0.10037	-0.32632	-0.20458	0.110746	-0.00974	-0.31681	0.495392		-1.22	-0.01862	1.03738	-0.09779	0.114843
-0.648	0.425713	-0.17462	0.528911	0.59822	-0.41652	0.318191	-0.36745	0.115258	0.52208	-0.20263	0.513236	0.466492	-0.32767	-0.22789	0.990924		-1.1956	-0.89828	-0.05609	0.018956	-0.10304	-0.04678	-0.32561	-0.18451	0.097961	-0.08437	-0.32892	0.445455		-1.1956	0.134437	0.997221	0.015923	0.10706
-0.624	0.446923	-0.26088	0.49203	0.648933	-0.47155	0.368024	-0.35385	0.166135	0.614758	-0.21043	0.501165	0.246093	-0.42421	-0.22569	0.990966		-1.1712	-0.90637	-0.1013	0.019856	-0.13408	0.026162	-0.3253	-0.18343	0.088408	-0.16272	-0.32589	0.386559		-1.1712	0.280549	0.94718	0.137917	0.062331
-0.6	0.463425	-0.34511	0.445375	0.674163	-0.50352	0.421083	-0.34431	0.217793	0.70816	-0.20449	0.468959	-0.06041	-0.47246	-0.22933	1.03922		-1.1468	-0.9072	-0.16431	0.033735	-0.15789	0.106953	-0.31784	-0.19916	0.068503	-0.2507	-0.31154	0.332837		-1.1468	0.39896	0.900722	0.251068	-0.00706
-0.576	0.476761	-0.41398	0.385172	0.681167	-0.51037	0.469035	-0.33963	0.267737	0.791045	-0.18232	0.42246	-0.38938	-0.4726	-0.23819	1.10457		-1.1224	-0.89896	-0.23235	0.055572	-0.17047	0.180774	-0.30201	-0.22418	0.027756	-0.34543	-0.2917	0.298884		-1.1224	0.485056	0.861975	0.34068	-0.07317
-0.552	0.483397	-0.45533	0.308828	0.67225	-0.49648	0.504816	-0.34043	0.313391	0.853493	-0.14581	0.369377	-0.67403	-0.42615	-0.25767	1.14589		-1.098	-0.8863	-0.29325	0.082823	-0.16463	0.234535	-0.28219	-0.25188	-0.03713	-0.42951	-0.27155	0.297681		-1.098	0.550193	0.826341	0.402998	-0.10876
-0.528	0.471532	-0.4616	0.220077	0.641558	-0.46758	0.52161	-0.3481	0.349523	0.889145	-0.10294	0.317052	-0.88073	-0.34151	-0.29466	1.13728		-1.0736	-0.8809	-0.3379	0.113854	-0.13747	0.262514	-0.26428	-0.27909	-0.12199	-0.48079	-0.25328	0.338922		-1.0736	0.609829	0.786231	0.4428	-0.10625
-0.504	0.430529	-0.43131	0.12762	0.585744	-0.4285	0.516469	-0.36083	0.369827	0.895337	-0.06574	0.267069	-1.01239	-0.23209	-0.34852	1.08113		-1.0492	-0.89064	-0.35801	0.144016	-0.09273	0.266844	-0.25419	-0.30271	-0.21346	-0.48772	-0.23308	0.421913		-1.0492	0.67701	0.737511	0.464941	-0.07702
-0.48	0.363471	-0.37077	0.041367	0.512658	-0.38346	0.495187	-0.37177	0.371134	0.875057	-0.04305	0.215101	-1.08982	-0.11256	-0.40631	0.999862		-1.0248	-0.90901	-0.34982	0.16696	-0.03844	0.251701	-0.25808	-0.31885	-0.29061	-0.453	-0.20425	0.529516		-1.0248	0.762301	0.682781	0.469337	-0.03426
-0.456	0.284638	-0.2934	-0.03026	0.436239	-0.33717	0.469177	-0.37495	0.357196	0.837427	-0.03551	0.159354	-1.13082	0.005256	-0.44901	0.914057		-1.0004	-0.92361	-0.32096	0.179168	0.013888	0.219624	-0.28214	-0.32585	-0.3368	-0.38747	-0.16355	0.631649		-1.0004	0.868044	0.625893	0.451703	0.014368
-0.432	0.208581	-0.21383	-0.08251	0.367305	-0.29494	0.448257	-0.37166	0.336593	0.795353	-0.03722	0.105258	-1.13556	0.116176	-0.4659	0.830972		-0.976	-0.93216	-0.29015	0.182894	0.04983	0.175002	-0.32827	-0.32577	-0.35023	-0.30477	-0.11249	0.700593		-0.976	0.984183	0.570865	0.409096	0.060779
-0.408	0.146336	-0.14387	-0.11473	0.312176	-0.26116	0.436269	-0.36982	0.31567	0.760247	-0.04088	0.06292	-1.0867	0.219117	-0.46205	0.752343		-0.9516	-0.94098	-0.27743	0.186502	0.057721	0.12553	-0.38556	-0.32334	-0.34055	-0.21833	-0.05574	0.727817		-0.9516	1.09172	0.528321	0.346042	0.095629
-0.384	0.104377	-0.09208	-0.12992	0.275027	-0.23752	0.431261	-0.37881	0.299017	0.73613	-0.0419	0.043846	-0.96624	0.315313	-0.45031	0.681665		-0.9272	-0.95254	-0.29293	0.199366	0.035649	0.077585	-0.43368	-0.32296	-0.31844	-0.13821	-0.0005	0.722966		-0.9272	1.16619	0.51019	0.273794	0.117612
-0.36	0.082128	-0.06004	-0.13357	0.256085	-0.22152	0.42816	-0.40452	0.295201	0.723121	-0.03974	0.052694	-0.7735	0.408402	-0.43659	0.620586		-0.9028	-0.96185	-0.33336	0.223503	-0.00673	0.035413	-0.45885	-0.32604	-0.28911	-0.0702	0.045893	0.698586		-0.9028	1.18249	0.5143	0.204368	0.138371
-0.336	0.073683	-0.03962	-0.13164	0.249429	-0.20811	0.420377	-0.44644	0.310517	0.724751	-0.03802	0.077079	-0.53042	0.499679	-0.41701	0.569159		-0.8784	-0.9613	-0.38753	0.251471	-0.05193	0.00435	-0.46032	-0.33045	-0.25342	-0.02005	0.078426	0.664173		-0.8784	1.12861	0.519382	0.148143	0.171234
-0.312	0.072288	-0.01972	-0.12877	0.24793	-0.1939	0.403416	-0.49801	0.337936	0.744393	-0.04269	0.094484	-0.27845	0.586274	-0.38888	0.530844		-0.854	-0.94813	-0.44372	0.272717	-0.08232	-0.01056	-0.4466	-0.33106	-0.21363	0.00613	0.094319	0.630356		-0.854	1.02152	0.496485	0.114412	0.216512
-0.288	0.073262	0.004154	-0.1265	0.248172	-0.17917	0.380957	-0.54915	0.359963	0.77986	-0.05651	0.091915	-0.06543	0.664447	-0.35702	0.506288		-0.8296	-0.92914	-0.4948	0.279815	-0.08953	-0.00732	-0.43329	-0.32304	-0.17406	0.009312	0.095113	0.607992		-0.8296	0.902808	0.424831	0.110852	0.264187
-0.264	0.074858	0.027607	-0.12252	0.24662	-0.16756	0.364524	-0.59064	0.361522	0.826108	-0.07658	0.073502	0.082036	0.730695	-0.32698	0.480995		-0.8052	-0.91279	-0.53927	0.269999	-0.07796	0.014098	-0.43545	-0.30714	-0.13624	0.000154	0.089109	0.60243		-0.8052	0.812127	0.298938	0.140791	0.30646
-0.24	0.077447	0.041626	-0.11328	0.238639	-0.16281	0.36427	-0.61833	0.341309	0.875575	-0.09758	0.052184	0.173851	0.780565	-0.29717	0.430558		-0.7808	-0.89704	-0.57734	0.24625	-0.0608	0.051689	-0.45638	-0.28951	-0.09898	-0.00866	0.088096	0.612361		-0.7808	0.767821	0.126129	0.199362	0.345865
-0.216	0.082946	0.038172	-0.09794	0.22571	-0.1621	0.378077	-0.63355	0.31573	0.916001	-0.11594	0.037822	0.234291	0.808119	-0.26064	0.34173		-0.7564	-0.87201	-0.60728	0.218493	-0.05217	0.099	-0.48667	-0.27569	-0.06235	-0.01162	0.102263	0.636005		-0.7564	0.767568	-0.08383	0.272743	0.397233
-0.192	0.094387	0.013431	-0.08069	0.214636	-0.15554	0.391731	-0.64013	0.308385	0.935834	-0.13263	0.030568	0.271497	0.808372	-0.21357	0.22038		-0.732	-0.83183	-0.62787	0.20051	-0.05714	0.147004	-0.51208	-0.26592	-0.02866	-0.01265	0.138396	0.675416		-0.732	0.7982	-0.32742	0.342756	0.474276
-0.168	0.113755	-0.03143	-0.06942	0.208102	-0.13325	0.392354	-0.6413	0.330652	0.932308	-0.1519	0.024114	0.278061	0.782844	-0.16044	0.082464		-0.7076	-0.77869	-0.63893	0.203729	-0.06833	0.189428	-0.52407	-0.25398	-0.00246	-0.01915	0.198724	0.733426		-0.7076	0.844949	-0.59767	0.398593	0.569394
-0.144	0.140182	-0.0907	-0.06979	0.202663	-0.09139	0.378579	-0.63987	0.375918	0.912742	-0.17707	0.014428	0.247615	0.742799	-0.11193	-0.05265		-0.6832	-0.71961	-0.63768	0.23225	-0.07443	0.22461	-0.52545	-0.23038	0.010864	-0.03442	0.277913	0.811111		-0.6832	0.893146	-0.87001	0.445867	0.65409
-0.12	0.170208	-0.1568	-0.07998	0.194037	-0.03439	0.359451	-0.64028	0.430974	0.888912	-0.21055	0.004965	0.17876	0.706051	-0.07954	-0.16539		-0.6588	-0.66463	-0.62179	0.281644	-0.06747	0.252825	-0.52159	-0.18827	0.008134	-0.05401	0.363896	0.904227		-0.6588	0.925307	-1.10825	0.497359	0.699106
-0.096	0.199962	-0.22555	-0.09469	0.179255	0.028656	0.346086	-0.64802	0.483965	0.871369	-0.25535	0.005736	0.079194	0.688929	-0.06848	-0.24031		-0.6344	-0.62703	-0.59487	0.341701	-0.04249	0.272538	-0.50939	-0.12733	-0.00968	-0.06694	0.44593	0.994644		-0.6344	0.924437	-1.28132	0.556428	0.691261
-0.072	0.229133	-0.29928	-0.11353	0.156428	0.091608	0.340437	-0.6668	0.525551	0.868224	-0.31119	0.027911	-0.0241	0.695781	-0.07338	-0.26642		-0.61	-0.61881	-0.56385	0.399831	0.000763	0.280271	-0.48002	-0.05261	-0.03536	-0.06277	0.520365	1.05044		-0.61	0.887768	-1.37115	0.61587	0.634021
-0.048	0.262024	-0.38365	-0.14162	0.127768	0.152764	0.33306	-0.69577	0.553177	0.885419	-0.37276	0.078502	-0.09862	0.716206	-0.08381	-0.23805		-0.5856	-0.64182	-0.53397	0.445119	0.054007	0.276281	-0.42959	0.029372	-0.05762	-0.03871	0.587456	1.04174		-0.5856	0.83469	-1.37168	0.669639	0.540733
-0.024	0.303241	-0.48317	-0.18227	0.101074	0.209814	0.315128	-0.72841	0.570968	0.926596	-0.43399	0.157088	-0.13842	0.736986	-0.09096	-0.15929		-0.5612	-0.68453	-0.50641	0.47478	0.10327	0.267824	-0.36417	0.113557	-0.06991	0.000478	0.64559	0.957479		-0.5612	0.790651	-1.28798	0.717872	0.433806
0	0.355301	-0.59825	-0.23063	0.083798	0.255596	0.289378	-0.75627	0.579561	0.993118	-0.48904	0.251811	-0.17103	0.750896	-0.08563	-0.04205		-0.5368	-0.7276	-0.47805	0.49627	0.137368	0.262291	-0.29434	0.19657	-0.07407	0.045526	0.689675	0.81076		-0.5368	0.765363	-1.13618	0.761554	0.341897
0.024	0.419577	-0.71867	-0.27472	0.07611	0.276577	0.265619	-0.77439	0.573039	1.08403	-0.52863	0.340276	-0.22789	0.753491	-0.05711	0.101992		-0.5124	-0.75534	-0.44281	0.522896	0.152901	0.259825	-0.22463	0.275422	-0.07386	0.085162	0.714896	0.635005		-0.5124	0.756216	-0.94245	0.799587	0.286155
0.048	0.491707	-0.82326	-0.30177	0.073124	0.259154	0.25063	-0.78194	0.54918	1.19516	-0.5425	0.402212	-0.31161	0.743615	-0.00064	0.263836		-0.488	-0.76515	-0.39309	0.5689	0.153587	0.255322	-0.15076	0.347288	-0.06688	0.112048	0.722322	0.472444		-0.488	0.768045	-0.74263	0.83081	0.269709
0.072	0.55636	-0.89429	-0.30459	0.072613	0.201428	0.24824	-0.78089	0.512166	1.31854	-0.52785	0.434079	-0.39808	0.726268	0.075987	0.433068		-0.4636	-0.76467	-0.32196	0.642606	0.146579	0.244152	-0.06989	0.410568	-0.04449	0.1257	0.721755	0.356504		-0.4636	0.816017	-0.57424	0.855563	0.283719
0.096	0.59543	-0.9266	-0.2848	0.076461	0.11494	0.261944	-0.7767	0.463288	1.44421	-0.49228	0.448376	-0.46348	0.709136	0.154334	0.594213		-0.4392	-0.76245	-0.2247	0.73888	0.136348	0.224231	0.011272	0.465634	-6.91e-05	0.127196	0.728397	0.298207		-0.4392	0.91059	-0.46049	0.87542	0.318896
0.12	0.603512	-0.92169	-0.25027	0.086689	0.015413	0.290643	-0.77745	0.3997	1.56104	-0.44671	0.459093	-0.50072	0.701889	0.214773	0.728279		-0.4148	-0.76515	-0.09885	0.841212	0.121424	0.194259	0.083338	0.516227	0.065139	0.11691	0.750701	0.286852		-0.4148	1.05039	-0.39988	0.890872	0.366288
0.144	0.59144	-0.88245	-0.21007	0.103746	-0.08198	0.325471	-0.79077	0.3255	1.65476	-0.39708	0.474632	-0.51608	0.716374	0.246101	0.820069		-0.3904	-0.77725	0.052128	0.934204	0.101413	0.153895	0.143316	0.570077	0.146031	0.096923	0.781345	0.304614		-0.3904	1.22595	-0.36816	0.902527	0.412133
0.168	0.573925	-0.81305	-0.17285	0.127218	-0.16098	0.35228	-0.82086	0.257815	1.71024	-0.34421	0.501916	-0.51373	0.759768	0.247016	0.86587		-0.366	-0.79451	0.214781	1.01207	0.085871	0.107994	0.194045	0.636001	0.240263	0.068963	0.806118	0.339986		-0.366	1.42126	-0.33518	0.91648	0.442159
0.192	0.556886	-0.71967	-0.14671	0.155426	-0.20638	0.358066	-0.86619	0.217292	1.72086	-0.28909	0.544842	-0.48882	0.829499	0.222366	0.872705		-0.3416	-0.80294	0.370633	1.07537	0.089858	0.065017	0.240325	0.720426	0.347033	0.032131	0.817054	0.387985		-0.3416	1.61419	-0.28394	0.942658	0.453376
0.216	0.536702	-0.61397	-0.13678	0.18313	-0.21014	0.340325	-0.91927	0.215314	1.69624	-0.23456	0.596898	-0.43822	0.914918	0.179503	0.849494		-0.3172	-0.79151	0.505359	1.1257	0.12119	0.029341	0.285295	0.824784	0.459223	-0.01315	0.813405	0.445071		-0.3172	1.77663	-0.21083	0.986074	0.455399
0.24	0.508048	-0.51462	-0.1436	0.201796	-0.17441	0.311005	-0.9701	0.251025	1.65704	-0.18265	0.642337	-0.36889	1.00304	0.125666	0.79978		-0.2928	-0.76241	0.61241	1.16482	0.175785	0.000965	0.328819	0.942231	0.559801	-0.05922	0.798468	0.508019		-0.2928	1.87614	-0.11833	1.04187	0.458461
0.264	0.472323	-0.44241	-0.16448	0.206017	-0.10894	0.287839	-1.01108	0.31267	1.62259	-0.13416	0.667222	-0.29393	1.08723	0.069079	0.725129		-0.2684	-0.72879	0.692164	1.1944	0.242787	-0.01957	0.370475	1.05827	0.629912	-0.09138	0.778319	0.573329		-0.2684	1.89575	-0.01607	1.09737	0.465246
0.288	0.439769	-0.41542	-0.19424	0.198545	-0.02683	0.280883	-1.03976	0.381803	1.6047	-0.09043	0.668001	-0.22459	1.1671	0.020137	0.637618		-0.244	-0.70397	0.748202	1.21739	0.311529	-0.03069	0.41064	1.15719	0.660819	-0.09733	0.757509	0.635033		-0.244	1.85403	0.079431	1.13905	0.471846
0.312	0.423339	-0.44223	-0.22385	0.186054	0.059215	0.286377	-1.05823	0.443006	1.60604	-0.05342	0.651262	-0.16333	1.23567	-0.0122	0.562893		-0.2196	-0.69163	0.780856	1.24128	0.375756	-0.0313	0.446952	1.2267	0.655615	-0.07731	0.735056	0.686466		-0.2196	1.78606	0.153471	1.15873	0.470067
0.336	0.430914	-0.51351	-0.24175	0.17345	0.140283	0.29172	-1.06902	0.488422	1.62	-0.02497	0.627768	-0.10605	1.27588	-0.02368	0.525445		-0.1952	-0.68898	0.785587	1.27561	0.430856	-0.02168	0.47437	1.25863	0.620813	-0.04419	0.708039	0.726062		-0.1952	1.71108	0.205325	1.15289	0.452561
0.36	0.463355	-0.60585	-0.23838	0.165039	0.211546	0.286198	-1.07054	0.514346	1.63569	-0.00629	0.605661	-0.05123	1.27421	-0.01486	0.532687		-0.1708	-0.69454	0.758325	1.32523	0.468842	-0.00414	0.490317	1.24966	0.558086	-0.01386	0.678122	0.75638		-0.1708	1.62649	0.252433	1.12162	0.419736
0.384	0.517563	-0.69645	-0.21012	0.165809	0.271832	0.268185	-1.05842	0.51842	1.64311	0.004301	0.588296	-0.00216	1.23105	0.00848	0.57179		-0.1464	-0.70729	0.699578	1.38781	0.482023	0.017688	0.495622	1.20059	0.465397	0.006181	0.652016	0.774296		-0.1464	1.51724	0.317411	1.0724	0.379364
0.408	0.586857	-0.77224	-0.16214	0.176958	0.325743	0.24411	-1.03225	0.499494	1.63259	0.01249	0.57644	0.035525	1.15835	0.037672	0.619438		-0.122	-0.72322	0.615364	1.4549	0.469679	0.037865	0.490261	1.11414	0.347444	0.019977	0.63493	0.768662		-0.122	1.37225	0.411967	1.01982	0.338871
0.432	0.657406	-0.82795	-0.10621	0.192889	0.38261	0.220614	-0.9997	0.460763	1.59635	0.02367	0.571094	0.059741	1.07336	0.067595	0.655163		-0.0976	-0.73502	0.518021	1.51564	0.437127	0.045912	0.474643	0.994279	0.223133	0.034054	0.62402	0.732156		-0.0976	1.20424	0.533614	0.978638	0.300177
0.456	0.70962	-0.86054	-0.05242	0.206604	0.449224	0.199785	-0.97411	0.413541	1.53472	0.039772	0.574873	0.073148	0.990907	0.097981	0.665762		-0.0732	-0.73224	0.425323	1.56164	0.391069	0.030506	0.454706	0.847713	0.12071	0.047091	0.611494	0.668814		-0.0732	1.05107	0.667437	0.957161	0.262928
0.48	0.727613	-0.86929	-0.00387	0.215733	0.525989	0.184485	-0.96747	0.373286	1.45743	0.061549	0.588378	0.068115	0.912026	0.1278	0.647037		-0.0488	-0.70575	0.356253	1.58754	0.336518	-0.01176	0.438073	0.685509	0.062557	0.05097	0.594689	0.587762		-0.0488	0.952261	0.78816	0.953292	0.226597
0.504	0.707611	-0.85871	0.041141	0.219413	0.608756	0.182251	-0.98318	0.349224	1.37907	0.09006	0.606278	0.029608	0.822881	0.152908	0.608624		-0.0244	-0.65654	0.324177	1.59091	0.27384	-0.07476	0.426665	0.521328	0.051985	0.04165	0.57914	0.497153		-0.0244	0.925132	0.873802	0.956279	0.185172
0.528	0.658079	-0.83585	0.084878	0.214019	0.688778	0.198879	-1.01357	0.340763	1.31597	0.126398	0.6199	-0.03513	0.714953	0.167528	0.565775		0	-0.59766	0.329688	1.57585	0.197647	-0.15031	0.418037	0.367762	0.075448	0.026111	0.571629	0.405335		0	0.959202	0.920758	0.956644	0.129055
0.552	0.595207	-0.80243	0.128108	0.19625	0.755689	0.230823	-1.04436	0.343599	1.2839	0.170403	0.620845	-0.09505	0.600385	0.164058	0.52425		0.0244	-0.54662	0.359179	1.5514	0.102404	-0.23209	0.407751	0.234419	0.115412	0.017078	0.572384	0.321945		0.0244	1.02505	0.938066	0.952568	0.058398
0.576	0.53639	-0.75242	0.170195	0.165498	0.805012	0.266006	-1.06367	0.353496	1.29115	0.217176	0.602504	-0.1255	0.499592	0.13492	0.480618		0.0488	-0.5175	0.393891	1.52365	-0.00888	-0.31353	0.385897	0.127242	0.156559	0.023139	0.573167	0.2552		0.0488	1.08878	0.935904	0.943132	-0.00946
0.6	0.49141	-0.68188	0.209544	0.122724	0.837189	0.290982	-1.06856	0.365055	1.33224	0.257606	0.561178	-0.12433	0.423244	0.079349	0.432327		0.0732	-0.51634	0.422305	1.49373	-0.12262	-0.38834	0.338186	0.049583	0.185365	0.044464	0.56258	0.209855		0.0732	1.12306	0.925106	0.923475	-0.04626
0.624	0.458717	-0.59882	0.2442	0.072567	0.851143	0.296322	-1.06376	0.370104	1.39294	0.285162	0.496919	-0.10716	0.372976	0.009739	0.38374		0.0976	-0.53676	0.441425	1.46178	-0.22156	-0.45202	0.254684	0.005211	0.195572	0.07653	0.534005	0.187166		0.0976	1.11399	0.915414	0.892862	-0.02643
0.648	0.429579	-0.51854	0.274275	0.025786	0.846642	0.279106	-1.05518	0.357101	1.46077	0.299542	0.414947	-0.10245	0.34848	-0.05066	0.34417		0.122	-0.56082	0.447563	1.42742	-0.29296	-0.49835	0.136323	-0.00232	0.192983	0.11686	0.489267	0.183423		0.122	1.06997	0.913057	0.858606	0.059879
0.672	0.393852	-0.45458	0.301639	-0.00351	0.829245	0.245421	-1.04487	0.3169	1.52692	0.303889	0.327251	-0.14393	0.346886	-0.08193	0.323649		0.1464	-0.56985	0.432898	1.38874	-0.33397	-0.51767	-0.00466	0.025266	0.18782	0.16473	0.436792	0.192733		0.1464	1.02336	0.922353	0.826904	0.20279
0.696	0.345485	-0.41736	0.324483	-0.00283	0.806394	0.209551	-1.031	0.251331	1.58242	0.302696	0.251317	-0.24588	0.362176	-0.0816	0.331306		0.1708	-0.55521	0.392804	1.34494	-0.3528	-0.50317	-0.14919	0.078643	0.182774	0.216097	0.387127	0.213737		0.1708	1.01656	0.943944	0.798135	0.381859
0.72	0.287556	-0.41437	0.336852	0.033815	0.782468	0.188819	-1.01022	0.173286	1.61913	0.302521	0.203466	-0.38095	0.387562	-0.06153	0.365768		0.1952	-0.51981	0.332041	1.29864	-0.35995	-0.45892	-0.27963	0.144538	0.170131	0.264182	0.348715	0.24578		0.1952	1.07828	0.974901	0.773286	0.574422
0.744	0.234608	-0.44915	0.336878	0.101605	0.759964	0.197967	-0.97974	0.098199	1.63191	0.311215	0.19284	-0.49538	0.41421	-0.03154	0.406459		0.2196	-0.4746	0.263075	1.25241	-0.35913	-0.40105	-0.38633	0.211678	0.139247	0.304079	0.32456	0.281839		0.2196	1.20271	1.01013	0.758558	0.754126
0.768	0.208607	-0.52134	0.330766	0.18771	0.739856	0.245949	-0.93887	0.034759	1.61631	0.333266	0.221193	-0.55134	0.430636	0.007746	0.428464		0.244	-0.43516	0.199748	1.20547	-0.34866	-0.35142	-0.46689	0.272144	0.08591	0.335205	0.310224	0.314609		0.244	1.34933	1.03954	0.763657	0.895066
0.792	0.226206	-0.62545	0.326957	0.279156	0.719343	0.335477	-0.88848	-0.01514	1.56992	0.364771	0.284321	-0.55379	0.429036	0.056952	0.424989		0.2684	-0.41773	0.150545	1.15635	-0.32471	-0.32692	-0.51947	0.318381	0.015622	0.358392	0.296889	0.342614		0.2684	1.4672	1.05174	0.79582	0.983018
0.816	0.286451	-0.75041	0.329686	0.363963	0.69306	0.459907	-0.82993	-0.04903	1.49873	0.394712	0.373111	-0.5453	0.412699	0.111007	0.408665		0.2928	-0.43511	0.118323	1.10598	-0.28306	-0.33031	-0.53778	0.344349	-0.05844	0.370859	0.278213	0.366503		0.2928	1.52764	1.04134	0.850741	1.01583
0.84	0.371342	-0.88093	0.337484	0.430971	0.658365	0.59989	-0.76611	-0.06301	1.41533	0.412491	0.474728	-0.57569	0.39834	0.160536	0.395615		0.3172	-0.4921	0.104254	1.057	-0.22341	-0.3482	-0.51281	0.350095	-0.11854	0.369487	0.25276	0.387953		0.3172	1.53732	1.00785	0.910465	0.995617
0.864	0.458158	-0.99975	0.345535	0.475425	0.61849	0.731279	-0.70102	-0.05646	1.32971	0.414116	0.576274	-0.66122	0.41056	0.1968	0.392799		0.3416	-0.57924	0.107107	1.01215	-0.15343	-0.35784	-0.43891	0.34135	-0.14955	0.358701	0.221336	0.410969		0.3416	1.51564	0.953111	0.954919	0.930546
0.888	0.531257	-1.09211	0.349615	0.499141	0.579991	0.837847	-0.63731	-0.0321	1.24683	0.401614	0.671391	-0.77031	0.46828	0.216673	0.396041		0.366	-0.67325	0.123392	0.974581	-0.08849	-0.34034	-0.31904	0.325032	-0.1491	0.346984	0.18564	0.436824		0.366	1.46901	0.881924	0.975993	0.841688
0.912	0.584798	-1.15014	0.348526	0.504228	0.548359	0.91419	-0.57652	0.007652	1.17105	0.3786	0.761541	-0.84944	0.572527	0.222544	0.398138		0.3904	-0.74977	0.150059	0.949268	-0.04573	-0.29208	-0.16631	0.307066	-0.12912	0.336173	0.147702	0.459464		0.3904	1.39922	0.798579	0.980016	0.759279
0.936	0.619618	-1.17155	0.343504	0.488873	0.524522	0.961036	-0.52104	0.061063	1.10686	0.348762	0.849468	-0.85721	0.705108	0.216396	0.402388		0.4148	-0.79682	0.182771	0.941378	-0.03514	-0.22648	-0.00184	0.293491	-0.10662	0.320725	0.109337	0.470577		0.4148	1.3219	0.698658	0.978495	0.712628
0.96	0.638649	-1.15459	0.335712	0.44856	0.502738	0.980484	-0.47359	0.123475	1.05724	0.316575	0.932857	-0.786	0.837519	0.199234	0.423293		0.4392	-0.81707	0.216246	0.951263	-0.05502	-0.16592	0.151747	0.290909	-0.09394	0.297129	0.075651	0.470592		0.4392	1.25887	0.565737	0.979783	0.719805
0.984	0.642119	-1.0993	0.324208	0.384044	0.473321	0.974358	-0.43425	0.188155	1.02596	0.285562	1.00402	-0.669	0.943891	0.176898	0.471866		0.4636	-0.82072	0.249371	0.972184	-0.09585	-0.12857	0.27877	0.304185	-0.09503	0.270551	0.057359	0.47232		0.4636	1.22288	0.381253	0.991543	0.77982
1.008	0.628856	-1.01239	0.305309	0.306653	0.430134	0.945648	-0.39777	0.250232	1.01815	0.256154	1.05537	-0.55792	1.01072	0.159106	0.548426		0.488	-0.81742	0.28289	0.994321	-0.1481	-0.12122	0.376358	0.334079	-0.10731	0.250311	0.063554	0.488899		0.488	1.22411	0.142245	1.02654	0.87832
1.032	0.604548	-0.90664	0.27441	0.232717	0.376686	0.899226	-0.35514	0.302856	1.0345	0.225907	1.08226	-0.48734	1.04019	0.153152	0.646155		0.5124	-0.81192	0.311674	1.00964	-0.2067	-0.14391	0.453853	0.376559	-0.12702	0.239408	0.091807	0.519825		0.5124	1.27634	-0.1283	1.10017	0.998254
1.056	0.585302	-0.79951	0.231768	0.174121	0.325316	0.841887	-0.29968	0.333354	1.06852	0.190675	1.07981	-0.46712	1.04493	0.162452	0.750828		0.5368	-0.80373	0.326468	1.01322	-0.26859	-0.19539	0.523062	0.423823	-0.15493	0.230341	0.127974	0.553091		0.5368	1.37858	-0.38872	1.22263	1.11572
1.08	0.589694	-0.71215	0.185349	0.132845	0.290457	0.782256	-0.23212	0.331668	1.10967	0.14787	1.04385	-0.4924	1.03356	0.187366	0.839906		0.5612	-0.79081	0.3223	1.0041	-0.32899	-0.27089	0.587453	0.46752	-0.19605	0.2105	0.156387	0.576751		0.5612	1.50315	-0.59968	1.39102	1.19906
1.104	0.62604	-0.65978	0.143995	0.102442	0.279603	0.726694	-0.15961	0.300057	1.14744	0.100979	0.976273	-0.54293	1.00162	0.224594	0.88768		0.5856	-0.77544	0.300593	0.987395	-0.38024	-0.36072	0.642558	0.501991	-0.25132	0.170583	0.168109	0.585178		0.5856	1.61571	-0.74316	1.58603	1.22959
1.128	0.685857	-0.64117	0.112279	0.077202	0.287094	0.675803	-0.09105	0.251087	1.17596	0.058579	0.886085	-0.58596	0.940679	0.269272	0.874466		0.61	-0.76574	0.263749	0.972305	-0.41024	-0.45562	0.683957	0.525584	-0.31156	0.10975	0.158487	0.577769		0.61	1.70177	-0.82264	1.77917	1.21173
1.152	0.749026	-0.64287	0.096112	0.059759	0.299452	0.629576	-0.03422	0.200386	1.19505	0.027492	0.787117	-0.59091	0.850796	0.316946	0.800064		0.6344	-0.77037	0.210231	0.965481	-0.4064	-0.55003	0.712413	0.540167	-0.36284	0.036642	0.124531	0.557557		0.6344	1.77253	-0.84869	1.94442	1.15405
1.176	0.796874	-0.6523	0.104938	0.056534	0.307215	0.593907	0.003803	0.159665	1.20545	0.007024	0.694448	-0.5421	0.741765	0.36072	0.690155		0.6588	-0.79148	0.135671	0.968233	-0.36725	-0.63895	0.733125	0.548501	-0.39678	-0.03557	0.068353	0.533421		0.6588	1.84928	-0.83126	2.06497	1.05204
1.2	0.822041	-0.66238	0.141706	0.06933	0.305947	0.576936	0.017285	0.128554	1.20596	-0.01102	0.619642	-0.44543	0.626854	0.391811	0.580597		0.6832	-0.82055	0.039104	0.97992	-0.30792	-0.71496	0.751168	0.551215	-0.41414	-0.09936	-0.00371	0.516608		0.6832	1.93922	-0.77964	2.13402	0.893297
1.224	0.826815	-0.66687	0.196922	0.093686	0.289849	0.58013	0.004924	0.095714	1.1952	-0.03569	0.567214	-0.31997	0.516079	0.405662	0.493544		0.7076	-0.84143	-0.0696	0.999395	-0.25093	-0.76991	0.768794	0.54573	-0.42138	-0.15684	-0.08483	0.511549		0.7076	2.02802	-0.70138	2.14975	0.674259
1.248	0.816063	-0.66011	0.256647	0.123824	0.254383	0.598113	-0.02929	0.053069	1.17297	-0.0706	0.535026	-0.17684	0.416615	0.404539	0.431108		0.732	-0.84336	-0.16983	1.02316	-0.21248	-0.80019	0.784972	0.52741	-0.42318	-0.21521	-0.16633	0.512701		0.732	2.09756	-0.60065	2.11127	0.408654
1.272	0.793407	-0.64386	0.311743	0.160317	0.201855	0.624937	-0.07869	0.004622	1.13978	-0.11541	0.519036	-0.02033	0.337858	0.397962	0.384253		0.7564	-0.8347	-0.24129	1.04604	-0.19746	-0.80964	0.792877	0.492862	-0.41552	-0.28238	-0.23585	0.508915		0.7564	2.14388	-0.4753	2.02125	0.122338
1.296	0.761424	-0.62657	0.358235	0.208785	0.138394	0.654322	-0.13689	-0.03956	1.0969	-0.1685	0.518129	0.129989	0.289538	0.400952	0.342948		0.7808	-0.83827	-0.27451	1.06406	-0.20106	-0.80657	0.779876	0.44349	-0.38854	-0.36193	-0.2797	0.492502		0.7808	2.17543	-0.31868	1.89224	-0.15496
1.32	0.725999	-0.61313	0.392911	0.272053	0.071397	0.67803	-0.19999	-0.0717	1.04551	-0.22367	0.533879	0.241044	0.274359	0.423324	0.305692		0.8052	-0.8696	-0.27233	1.07442	-0.21087	-0.80042	0.735494	0.386354	-0.33931	-0.44852	-0.28914	0.466981		0.8052	2.20073	-0.12781	1.74922	-0.39424
1.344	0.698302	-0.60251	0.412077	0.349142	0.010587	0.689615	-0.26706	-0.08776	0.986596	-0.26756	0.566084	0.295163	0.286952	0.461493	0.279644		0.8296	-0.92162	-0.2464	1.07346	-0.21353	-0.7995	0.659756	0.33119	-0.2807	-0.53212	-0.26847	0.442425		0.8296	2.22092	0.092577	1.61868	-0.57255
1.368	0.687186	-0.59528	0.414498	0.432433	-0.03584	0.688174	-0.33735	-0.08539	0.922823	-0.28396	0.608908	0.30414	0.32121	0.50571	0.268639		0.854	-0.96945	-0.21395	1.05895	-0.20494	-0.80737	0.560185	0.284009	-0.23543	-0.60492	-0.23469	0.423163		0.854	2.23084	0.32979	1.51169	-0.68338
1.392	0.690404	-0.59747	0.402804	0.501931	-0.0653	0.677921	-0.40796	-0.06374	0.85634	-0.26179	0.652523	0.292395	0.377561	0.549055	0.267795		0.8784	-0.98835	-0.19437	1.03496	-0.19384	-0.82233	0.44273	0.242202	-0.22194	-0.66056	-0.2057	0.404259		0.8784	2.22554	0.563992	1.42006	-0.74396
1.416	0.697234	-0.61616	0.381044	0.53261	-0.07906	0.664545	-0.47442	-0.02704	0.785566	-0.19967	0.690079	0.281712	0.460051	0.586397	0.270043		0.9028	-0.96653	-0.20037	1.01032	-0.19434	-0.84045	0.311593	0.197899	-0.2457	-0.69168	-0.18977	0.378952		0.9028	2.20075	0.776536	1.32536	-0.78748
1.44	0.700367	-0.65281	0.352151	0.510265	-0.07969	0.651992	-0.53226	0.014314	0.706179	-0.10601	0.72169	0.293869	0.562823	0.610551	0.274004		0.9272	-0.90522	-0.22835	0.990406	-0.21658	-0.85649	0.173556	0.147228	-0.30217	-0.6927	-0.18493	0.346349		0.9272	2.14389	0.959404	1.2085	-0.84246
1.464	0.70089	-0.70181	0.318773	0.440146	-0.07178	0.642744	-0.57747	0.051883	0.61314	0.003461	0.751016	0.340799	0.667317	0.612153	0.284458		0.9516	-0.81337	-0.26127	0.973045	-0.26481	-0.864	0.03711	0.094743	-0.38336	-0.66558	-0.18321	0.311881		0.9516	2.0352	1.11119	1.05901	-0.91861
																	0.976	-0.70273	-0.28337	0.953809	-0.34032	-0.85852	-0.08818	0.048398	-0.47906	-0.62065	-0.17435	0.280838		0.976	1.8668	1.22965	0.880349	-1.01033
																	1.0004	-0.5836	-0.29322	0.932629	-0.44011	-0.83987	-0.19228	0.012505	-0.57746	-0.57222	-0.15106	0.251496		1.0004	1.65491	1.31638	0.686239	-1.10283
																	1.0248	-0.46491	-0.30154	0.914008	-0.55278	-0.80987	-0.2706	-0.01493	-0.66879	-0.53417	-0.11426	0.217076		1.0248	1.42936	1.37644	0.494852	-1.17533
																	1.0492	-0.35757	-0.31673	0.903421	-0.66502	-0.77161	-0.32924	-0.04063	-0.75114	-0.51445	-0.07238	0.174399		1.0492	1.21983	1.40532	0.323129	-1.21304
																	1.0736	-0.27314	-0.33776	0.904561	-0.77262	-0.73198	-0.38134	-0.06916	-0.83182	-0.50859	-0.03324	0.126471		1.0736	1.05642	1.38827	0.180121	-1.21867
																	1.098	-0.21598	-0.36039	0.918305	-0.87558	-0.70036	-0.4368	-0.09572	-0.91778	-0.49868	0.002853	0.078706		1.098	0.96959	1.31522	0.066496	-1.20804
																	1.1224	-0.18026	-0.38539	0.941919	-0.96595	-0.68172	-0.49623	-0.10931	-1.0085	-0.46321	0.040043	0.034655		1.1224	0.979247	1.19091	-0.01932	-1.19831
																	1.1468	-0.15446	-0.41872	0.969581	-1.02978	-0.67142	-0.55395	-0.1039	-1.09942	-0.39291	0.078268	-0.00891		1.1468	1.08514	1.03088	-0.07796	-1.20269
																	1.1712	-0.12686	-0.46396	0.994737	-1.05778	-0.65781	-0.6035	-0.08276	-1.18333	-0.29532	0.109333	-0.06108		1.1712	1.26405	0.849062	-0.11266	-1.23192
																	1.1956	-0.09226	-0.52011	1.01062	-1.05242	-0.62978	-0.64398	-0.05247	-1.24928	-0.18536	0.12141	-0.12796		1.1956	1.47307	0.655467	-0.13187	-1.29061
																	1.22	-0.05656	-0.58901	1.01128	-1.02566	-0.58366	-0.68403	-0.01672	-1.28561	-0.07903	0.107558	-0.20679		1.22	1.66347	0.468966	-0.14361	-1.36724
																	1.2444	-0.03043	-0.67834	0.995466	-0.98782	-0.52558	-0.73559	0.023668	-1.2857	0.006633	0.072171	-0.28766		1.2444	1.80114	0.320064	-0.14965	-1.43286
																	1.2688	-0.01918	-0.79555	0.964754	-0.94131	-0.4673	-0.80468	0.06736	-1.25414	0.057828	0.028414	-0.35872		1.2688	1.87872	0.233466	-0.14844	-1.45566
																	1.2932	-0.02234	-0.943	0.916329	-0.88623	-0.41856	-0.88961	0.111034	-1.20418	0.070793	-0.01435	-0.41169		1.2932	1.91381	0.211683	-0.13873	-1.41821
																	1.3176	-0.03915	-1.11708	0.844193	-0.82647	-0.38234	-0.98354	0.151335	-1.1448	0.050834	-0.05769	-0.44488		1.3176	1.93553	0.234423	-0.11898	-1.32323
																	1.342	-0.06881	-1.30703	0.747765	-0.76637	-0.35585	-1.07984	0.186348	-1.07463	0.006463	-0.10635	-0.46168		1.342	1.96389	0.270084	-0.08738	-1.18753
																	1.3664	-0.10714	-1.49506	0.634367	-0.70456	-0.33389	-1.17788	0.21487	-0.98978	-0.05497	-0.15893	-0.46799		1.3664	2.00015	0.293708	-0.0443	-1.03152
																	1.3908	-0.14946	-1.66228	0.516238	-0.63564	-0.3111	-1.28069	0.235633	-0.89152	-0.13071	-0.20838	-0.47135		1.3908	2.03756	0.301462	0.003932	-0.87135
																	1.4152	-0.19561	-1.79803	0.40766	-0.55719	-0.28386	-1.38661	0.247678	-0.78716	-0.22172	-0.24778	-0.47606		1.4152	2.07125	0.304957	0.04623	-0.71841
																	1.4396	-0.24787	-1.90264	0.320757	-0.473	-0.25365	-1.487	0.251227	-0.68978	-0.32539	-0.27417	-0.47544		1.4396	2.09528	0.309461	0.075357	-0.58482
																	1.464	-0.30605	-1.98116	0.260797	-0.39141	-0.22729	-1.57282	0.247935	-0.61328	-0.43158	-0.28921	-0.45577		1.464	2.10637	0.301681	0.094069	-0.4858
																	1.4884	-0.36598	-2.03807	0.223478	-0.32211	-0.20948	-1.64175	0.24145	-0.562	-0.52764	-0.29946	-0.41215		1.4884	2.11689	0.259984	0.110374	-0.43316
																	1.5128	-0.42059	-2.07432	0.197404	-0.27379	-0.19733	-1.69817	0.238988	-0.52879	-0.60262	-0.31372	-0.35673		1.5128	2.14608	0.177275	0.125801	-0.42895
																	1.5372	-0.46129	-2.08479	0.172283	-0.2528	-0.18565	-1.74535	0.250553	-0.50243	-0.64525	-0.33639	-0.31019		1.5372	2.19409	0.070947	0.130276	-0.46979
																	1.5616	-0.48145	-2.06229	0.143553	-0.26178	-0.1726	-1.77922	0.283952	-0.47283	-0.64446	-0.36404	-0.28691		1.5616	2.24373	-0.0319	0.110375	-0.55324
																	1.586	-0.48206	-2.00837	0.109906	-0.29774	-0.15787	-1.79225	0.340068	-0.43412	-0.59645	-0.38814	-0.28671		1.586	2.28669	-0.1131	0.060265	-0.67453
																	1.6104	-0.4712	-1.9378	0.072785	-0.35025	-0.14099	-1.78203	0.412762	-0.38517	-0.50862	-0.39752	-0.30205		1.6104	2.33157	-0.17099	-0.01433	-0.81912
																	1.6348	-0.45597	-1.86935	0.038902	-0.40076	-0.12281	-1.75548	0.491912	-0.32774	-0.39487	-0.38256	-0.32927		1.6348	2.38992	-0.21948	-0.0986	-0.96346
																	1.6592	-0.43822	-1.81433	0.018534	-0.42691	-0.10546	-1.72699	0.566976	-0.2694	-0.26817	-0.34386	-0.36638		1.6592	2.46333	-0.2772	-0.17561	-1.0869
																	1.6836	-0.4174	-1.77447	0.020312	-0.41281	-0.09087	-1.713	0.631465	-0.22591	-0.1391	-0.29281	-0.4068		1.6836	2.54225	-0.35162	-0.23309	-1.17974
																	1.708	-0.39269	-1.74518	0.047939	-0.35845	-0.08097	-1.72531	0.686355	-0.21435	-0.01964	-0.24136	-0.44317		1.708	2.6165	-0.43541	-0.26524	-1.23797
																	1.7324	-0.36232	-1.72147	0.099667	-0.2806	-0.07722	-1.76513	0.738134	-0.2422	0.077807	-0.19576	-0.4741		1.7324	2.68769	-0.51882	-0.27191	-1.25663
																	1.7568	-0.3227	-1.70488	0.16891	-0.20365	-0.07784	-1.82237	0.793273	-0.30232	0.146878	-0.15772	-0.50214		1.7568	2.7651	-0.59822	-0.26038	-1.2297
																	1.7812	-0.26811	-1.70264	0.245693	-0.14675	-0.07707	-1.88127	0.854513	-0.37847	0.188174	-0.12725	-0.52551		1.7812	2.84579	-0.67311	-0.24647	-1.15528
																	1.8056	-0.19574	-1.71997	0.319388	-0.11696	-0.06798	-1.92509	0.919561	-0.45532	0.204878	-0.10381	-0.53735		1.8056	2.91122	-0.74375	-0.24737	-1.04605
																	1.83	-0.111	-1.75755	0.382192	-0.10997	-0.0439	-1.94266	0.981889	-0.522	0.201282	-0.08424	-0.53443		1.83	2.9468	-0.80915	-0.27165	-0.93087
																	1.8544	-0.02334	-1.8127	0.431138	-0.11395	0.000454	-1.93601	1.03459	-0.57159	0.183898	-0.06194	-0.51937		1.8544	2.94942	-0.86219	-0.31503	-0.83691
																	1.8788	0.062369	-1.8792	0.46793	-0.11708	0.06495	-1.91574	1.07428	-0.60267	0.160661	-0.03048	-0.4942		1.8788	2.91834	-0.88969	-0.3633	-0.77292
																	1.9032	0.146764	-1.94836	0.497775	-0.11685	0.141429	-1.89025	1.10154	-0.61689	0.136468	0.012155	-0.45913		1.9032	2.85231	-0.87984	-0.39886	-0.73092
																	1.9276	0.22905	-2.01018	0.52642	-0.12002	0.218786	-1.86448	1.11913	-0.6116	0.110263	0.062915	-0.41776		1.9276	2.7536	-0.83017	-0.40479	-0.69857
																	1.952	0.302633	-2.05346	0.555106	-0.13218	0.293401	-1.84455	1.13064	-0.57777	0.07887	0.118069	-0.37815		1.952	2.63037	-0.74926	-0.36762	-0.66985
																	1.9764	0.359758	-2.06858	0.579048	-0.15195	0.370887	-1.83862	1.13899	-0.50675	0.043132	0.177189	-0.34665		1.9764	2.4932	-0.65447	-0.28382	-0.64666
																	2.0008	0.400013	-2.05216	0.593001	-0.17228	0.456453	-1.85322	1.14546	-0.39963	0.009195	0.241166	-0.32184		2.0008	2.3476	-0.56864	-0.163	-0.63559
																	2.0252	0.431943	-2.00868	0.595555	-0.18177	0.548911	-1.88828	1.14966	-0.27115	-0.01492	0.30835	-0.29457		2.0252	2.19452	-0.51281	-0.02275	-0.64564
																	2.0496	0.465162	-1.94773	0.587576	-0.16838	0.642403	-1.93327	1.15022	-0.14539	-0.02181	0.374071	-0.2528		2.0496	2.0377	-0.49738	0.1184	-0.68346
																	2.074	0.504402	-1.88055	0.570815	-0.12675	0.727669	-1.9712	1.14492	-0.04578	-0.00394	0.430522	-0.191		2.074	1.88392	-0.52075	0.245771	-0.74471
																	2.0984	0.551438	-1.81724	0.546678	-0.06269	0.792818	-1.99116	1.1294	0.015709	0.046637	0.466719	-0.11961		2.0984	1.73954	-0.57233	0.347506	-0.80841
																	2.1228	0.606649	-1.76487	0.514981	0.009586	0.828273	-1.99499	1.09699	0.042859	0.133961	0.474283	-0.05964		2.1228	1.6168	-0.63486	0.409337	-0.84485
																	2.1472	0.667028	-1.72784	0.476939	0.075927	0.834344	-1.99203	1.04314	0.049399	0.252863	0.453342	-0.02395		2.1472	1.53995	-0.69243	0.417661	-0.83591
																	2.1716	0.728366	-1.70914	0.437426	0.130844	0.823224	-1.99329	0.969709	0.049222	0.389487	0.407713	-0.00779		2.1716	1.52961	-0.73682	0.371947	-0.78668
																	2.196	0.791369	-1.71058	0.402336	0.177936	0.810898	-2.01002	0.881817	0.051078	0.524503	0.337562	0.002751		2.196	1.57885	-0.7635	0.289432	-0.71534
																	2.2204	0.859972	-1.73196	0.37651	0.220707	0.807218	-2.05221	0.782575	0.060581	0.635501	0.243499	0.015926		2.2204	1.6543	-0.76936	0.193532	-0.63613
																	2.2448	0.933037	-1.76833	0.362377	0.253025	0.813805	-2.12519	0.672941	0.085278	0.705249	0.132167	0.028848		2.2448	1.71796	-0.75408	0.101199	-0.55768
																	2.2692	1.00257	-1.80817	0.356837	0.261367	0.8269	-2.2229	0.554096	0.135535	0.732819	0.009027	0.038852		2.2692	1.74716	-0.71922	0.020438	-0.49157
																	2.2936	1.05834	-1.8387	0.352308	0.239347	0.839508	-2.32343	0.428963	0.219397	0.733983	-0.12993	0.055169		2.2936	1.75124	-0.67153	-0.04964	-0.44746
																	2.318	1.09267	-1.85622	0.343979	0.197258	0.845731	-2.39998	0.301006	0.336714	0.729476	-0.29423	0.092454		2.318	1.77111	-0.6298	-0.11574	-0.42005
																	2.3424	1.10369	-1.86871	0.33503	0.155385	0.846688	-2.43961	0.170998	0.479255	0.732947	-0.49052	0.15818		2.3424	1.845	-0.61946	-0.18117	-0.39211
																	2.3668	1.09491	-1.88608	0.334397	0.132123	0.849657	-2.44839	0.036272	0.636301	0.749466	-0.71962	0.250194		2.3668	1.97281	-0.65781	-0.24128	-0.35355
																	2.3912	1.07197	-1.91063	0.349371	0.138091	0.861267	-2.44139	-0.10594	0.797151	0.781379	-0.97844	0.362177		2.3912	2.11311	-0.74598	-0.28744	-0.31191
																	2.4156	1.04056	-1.93629	0.37871	0.174655	0.883445	-2.43229	-0.25454	0.951017	0.829655	-1.26018	0.488304		2.4156	2.20809	-0.86941	-0.31288	-0.28034
																	2.44	1.00501	-1.95539	0.412528	0.23483	0.913107	-2.43167	-0.40404	1.08956	0.890365	-1.55125	0.621208		2.44	2.21594	-1.0026	-0.31699	-0.26171
																	2.4644	0.967692	-1.96672	0.440045	0.307157	0.942672	-2.44786	-0.54733	1.20687	0.9548	-1.83071	0.748787		2.4644	2.13001	-1.11883	-0.30517	-0.25166
																	2.4888	0.930924	-1.97527	0.456811	0.381627	0.963382	-2.48125	-0.67835	1.29755	1.01249	-2.0774	0.856634		2.4888	1.97931	-1.20396	-0.28396	-0.24747
																	2.5132	0.900699	-1.98551	0.463848	0.455242	0.970068	-2.51978	-0.79353	1.358	1.05111	-2.28004	0.930005		2.5132	1.81608	-1.26288	-0.25664	-0.2472
																	2.5376	0.88757	-1.99764	0.46286	0.53071	0.960875	-2.54531	-0.89273	1.38658	1.05605	-2.4384	0.955765		2.5376	1.69705	-1.30733	-0.22219	-0.24766
																	2.562	0.90015	-2.0081	0.454546	0.607838	0.932312	-2.5422	-0.97906	1.38284	1.01744	-2.55532	0.931172		2.562	1.65783	-1.34125	-0.17751	-0.24761
																	2.5864	0.935257	-2.01158	0.44077	0.679344	0.878281	-2.5019	-1.05628	1.35	0.941134	-2.6325	0.867927		2.5864	1.68861	-1.36106	-0.12359	-0.25136
																	2.6108	0.979221	-2.00215	0.426973	0.735034	0.797984	-2.42812	-1.12546	1.29565	0.848877	-2.67383	0.78322		2.6108	1.74355	-1.36222	-0.07105	-0.26642
																	2.6352	1.0218	-1.97424	0.420311	0.767902	0.702792	-2.33789	-1.18357	1.22989	0.764704	-2.68713	0.694329		2.6352	1.78465	-1.34675	-0.03471	-0.29535
																	2.6596	1.06279	-1.92637	0.423407	0.777548	0.611497	-2.25252	-1.22384	1.16301	0.701133	-2.68166	0.621167		2.6596	1.80626	-1.32714	-0.02117	-0.33126
																	2.684	1.10444	-1.86401	0.430244	0.768749	0.540956	-2.18747	-1.23808	1.1025	0.657913	-2.66681	0.581836		2.684	1.81626	-1.31536	-0.02685	-0.36279
																	2.7084	1.14573	-1.7984	0.430082	0.749468	0.500936	-2.14993	-1.22155	1.05319	0.631553	-2.65176	0.583172		2.7084	1.80786	-1.3106	-0.04591	-0.38292
																	2.7328	1.18464	-1.74343	0.415683	0.733711	0.492142	-2.14003	-1.17616	1.0188	0.621468	-2.64312	0.620389		2.7328	1.75686	-1.30234	-0.07486	-0.39423
																	2.7572	1.21873	-1.71018	0.387738	0.740371	0.506352	-2.15093	-1.10981	0.99994	0.626372	-2.64434	0.685077		2.7572	1.64468	-1.27838	-0.11194	-0.40531
																	2.7816	1.2434	-1.70028	0.352456	0.780661	0.5288	-2.17029	-1.03347	0.993107	0.640866	-2.65863	0.771707		2.7816	1.47668	-1.23264	-0.15521	-0.41952
																	2.806	1.25592	-1.70555	0.315733	0.850103	0.543979	-2.18608	-0.95736	0.993943	0.659844	-2.68967	0.879598		2.806	1.27894	-1.17027	-0.20192	-0.43075
																	2.8304	1.26193	-1.7151	0.281896	0.936987	0.544689	-2.1918	-0.88753	1.00028	0.684315	-2.73976	1.00941		2.8304	1.08731	-1.10183	-0.25056	-0.43566
																	2.8548	1.27116	-1.71939	0.25754	1.03223	0.535316	-2.18514	-0.82632	1.01375	0.718174	-2.80895	1.15666		2.8548	0.939625	-1.0356	-0.30314	-0.44515
																	2.8792	1.28533	-1.71038	0.250345	1.13055	0.523453	-2.16313	-0.77592	1.0409	0.757722	-2.89277	1.31045		2.8792	0.866681	-0.9822	-0.36388	-0.4743
																	2.9036	1.29541	-1.68469	0.261573	1.22969	0.510759	-2.11942	-0.73999	1.08965	0.791392	-2.98101	1.45406		2.9036	0.874491	-0.96104	-0.43637	-0.5258
																	2.928	1.29065	-1.64689	0.282136	1.32811	0.494335	-2.04728	-0.72282	1.16148	0.812673	-3.06209	1.5648		2.928	0.93441	-0.98838	-0.52198	-0.5906
																	2.9524	1.26814	-1.60655	0.297041	1.42057	0.474723	-1.94628	-0.72668	1.24841	0.824556	-3.12603	1.62414		2.9524	0.999448	-1.05748	-0.61591	-0.65627
																	2.9768	1.23468	-1.57214	0.295523	1.49915	0.459478	-1.82532	-0.74834	1.33856	0.830605	-3.16162	1.62998		2.9768	1.02931	-1.13963	-0.7057	-0.70862
																	3.0012	1.20124	-1.5465	0.278252	1.55813	0.455277	-1.69886	-0.77934	1.42198	0.830283	-3.15763	1.5961		3.0012	1.00588	-1.20253	-0.77959	-0.7348
																	3.0256	1.17782	-1.52646	0.254252	1.59363	0.457561	-1.58041	-0.81079	1.49198	0.822375	-3.11073	1.54739		3.0256	0.939795	-1.22354	-0.83246	-0.73066
																	3.05	1.17273	-1.50919	0.232908	1.60178	0.452366	-1.47863	-0.83713	1.54623	0.808063	-3.03044	1.51066		3.05	0.858089	-1.19507	-0.8647	-0.70234
																	3.0744	1.19145	-1.49783	0.21844	1.58178	0.427827	-1.39751	-0.85531	1.58695	0.790827	-2.9355	1.49489		3.0744	0.774387	-1.12637	-0.88298	-0.65987
																	3.0988	1.23415	-1.49532	0.208669	1.53739	0.383009	-1.33867	-0.86242	1.61589	0.774443	-2.84599	1.48251		3.0988	0.680876	-1.03914	-0.89945	-0.60849
																	3.1232	1.29496	-1.49503	0.199796	1.47297	0.325647	-1.30167	-0.85552	1.628	0.76406	-2.77637	1.4477		3.1232	0.573406	-0.95752	-0.92376	-0.54562
																	3.1476	1.36203	-1.48414	0.192061	1.39004	0.264139	-1.28272	-0.83317	1.61417	0.768972	-2.73057	1.37936		3.1476	0.465224	-0.90096	-0.95951	-0.46733
																	3.172	1.42164	-1.45452	0.188417	1.2865	0.20644	-1.27592	-0.7968	1.57335	0.798952	-2.70164	1.28504		3.172	0.374115	-0.88014	-1.00884	-0.37373
																	3.1964	1.46478	-1.4068	0.189693	1.16146	0.161856	-1.27583	-0.75012	1.51684	0.856793	-2.67835	1.17957		3.1964	0.308573	-0.89133	-1.07195	-0.26632
																	3.2208	1.48904	-1.34728	0.193751	1.02368	0.137141	-1.2787	-0.69717	1.4587	0.932045	-2.65196	1.0749		3.2208	0.26171	-0.91735	-1.14225	-0.15106
																	3.2452	1.4968	-1.2848	0.196491	0.891674	0.131738	-1.28174	-0.64246	1.40593	1.00107	-2.61873	0.978226		3.2452	0.213475	-0.94083	-1.20926	-0.04559
																	3.2696	1.49223	-1.22863	0.193026	0.783487	0.137905	-1.28118	-0.59086	1.35715	1.03957	-2.58059	0.894643		3.2696	0.141503	-0.95683	-1.26494	0.02712
																	3.294	1.47995	-1.18475	0.183261	0.708121	0.145568	-1.27123	-0.54411	1.30853	1.03449	-2.54283	0.82987		3.294	0.034954	-0.97243	-1.3035	0.053448
																	3.3184	1.46763	-1.15225	0.175044	0.664639	0.148848	-1.24488	-0.49864	1.25944	0.984453	-2.51026	0.790087		3.3184	-0.09471	-0.99615	-1.32004	0.035161
																	3.3428	1.46629	-1.12383	0.177725	0.645692	0.148766	-1.19971	-0.44829	1.2105	0.8986	-2.48544	0.776498		3.3428	-0.21705	-1.02874	-1.31527	-0.01619
																	3.3672	1.4843	-1.09115	0.194447	0.640493	0.149178	-1.14284	-0.38914	1.15917	0.793952	-2.46717	0.778603		3.3672	-0.29777	-1.06087	-1.29874	-0.08621
																	3.3916	1.51918	-1.05084	0.219748	0.635478	0.152488	-1.0866	-0.32168	1.09963	0.686725	-2.45179	0.779009		3.3916	-0.31171	-1.07699	-1.2832	-0.1592
																	3.416	1.55706	-1.00453	0.242526	0.618087	0.159908	-1.04397	-0.25016	1.02591	0.586652	-2.43895	0.769293		3.416	-0.25176	-1.06812	-1.27594	-0.21759
																	3.4404	1.58374	-0.95711	0.252663	0.583895	0.170338	-1.02715	-0.18151	0.936472	0.496435	-2.43364	0.753629		3.4404	-0.13367	-1.04489	-1.2779	-0.24501
																	3.4648	1.59416	-0.91956	0.245161	0.538739	0.177588	-1.03982	-0.12359	0.83568	0.415779	-2.44125	0.736816		3.4648	0.009421	-1.03034	-1.28697	-0.23637
																	3.4892	1.58945	-0.90559	0.220951	0.49364	0.172617	-1.07159	-0.08239	0.730034	0.349557	-2.46309	0.719168		3.4892	0.14209	-1.03978	-1.29435	-0.20442
																	3.5136	1.57055	-0.91841	0.187151	0.459148	0.150124	-1.10779	-0.06016	0.625139	0.306206	-2.49557	0.698991		3.5136	0.24048	-1.07242	-1.2842	-0.16736
																	3.538	1.53772	-0.94752	0.153144	0.441974	0.112739	-1.14349	-0.05753	0.523591	0.284793	-2.5308	0.671398		3.538	0.295302	-1.1158	-1.24513	-0.13219
																	3.5624	1.49384	-0.97864	0.12506	0.440493	0.068854	-1.1851	-0.07614	0.425179	0.270296	-2.55933	0.627385		3.5624	0.306172	-1.15824	-1.17993	-0.09611
																	3.5868	1.44861	-1.00146	0.108503	0.443398	0.028142	-1.23861	-0.1141	0.333589	0.245576	-2.57449	0.556618		3.5868	0.280077	-1.19711	-1.10445	-0.05979
																	3.6112	1.41604	-1.01234	0.112837	0.435689	-0.0012	-1.29844	-0.16004	0.260681	0.206892	-2.57245	0.455891		3.6112	0.235602	-1.2323	-1.03842	-0.0325
																	3.6356	1.40327	-1.01382	0.145523	0.40711	-0.01589	-1.34897	-0.19751	0.219926	0.16644	-2.54902	0.337997		3.6356	0.193558	-1.25991	-0.99427	-0.02224
																	3.66	1.40489	-1.01021	0.204852	0.358413	-0.01892	-1.37512	-0.21582	0.217643	0.139444	-2.49916	0.225065		3.66	0.159985	-1.27785	-0.97417	-0.02788
																	3.6844	1.40771	-1.00342	0.280649	0.301209	-0.01516	-1.3721	-0.21483	0.252077	0.130421	-2.42099	0.133273		3.6844	0.127021	-1.29193	-0.97629	-0.04453
																	3.7088	1.39742	-0.99451	0.359927	0.250276	-0.00867	-1.3486	-0.20179	0.31618	0.134362	-2.32222	0.070792		3.7088	0.091726	-1.31086	-0.99843	-0.06631
																	3.7332	1.36661	-0.98725	0.431927	0.213119	-0.00321	-1.31892	-0.18678	0.397059	0.148447	-2.22072	0.043245		3.7332	0.073559	-1.33654	-1.03597	-0.08353
																	3.7576	1.32163	-0.98578	0.488476	0.184705	-0.00141	-1.29	-0.17855	0.478753	0.177674	-2.13351	0.050017		3.7576	0.105139	-1.36011	-1.08162	-0.08867
																	3.782	1.27853	-0.99195	0.523265	0.153294	-0.00534	-1.25902	-0.18081	0.549321	0.229282	-2.06606	0.079629		3.782	0.199931	-1.36647	-1.12454	-0.08486
																	3.8064	1.25066	-1.00746	0.535635	0.112303	-0.01663	-1.21975	-0.19186	0.600881	0.305443	-2.01513	0.115431		3.8064	0.335565	-1.34867	-1.14865	-0.08204
																	3.8308	1.24143	-1.03462	0.531935	0.066277	-0.03275	-1.16845	-0.20613	0.628093	0.402873	-1.976	0.144505		3.8308	0.469331	-1.31706	-1.13974	-0.08746
																	3.8552	1.2459	-1.07087	0.519711	0.026794	-0.04803	-1.10841	-0.21524	0.633555	0.515175	-1.94251	0.160781		3.8552	0.563601	-1.28997	-1.09343	-0.10534
																	3.8796	1.25556	-1.10156	0.503295	0.003641	-0.05907	-1.04934	-0.21104	0.628136	0.631806	-1.90685	0.16295		3.8796	0.59716	-1.28262	-1.01417	-0.142
																	3.904	1.26337	-1.1054	0.484269	-0.00142	-0.06477	-1.00132	-0.19029	0.621481	0.740491	-1.86262	0.154158		3.904	0.567493	-1.30217	-0.91213	-0.20633
																	3.9284	1.26709	-1.07304	0.462703	0.005904	-0.0651	-0.97202	-0.15592	0.617178	0.835926	-1.80532	0.141665		3.9284	0.495771	-1.34262	-0.79908	-0.30456
																	3.9528	1.26884	-1.01673	0.439413	0.017784	-0.06293	-0.96708	-0.113	0.616212	0.921256	-1.73338	0.131294		3.9528	0.421326	-1.38931	-0.68312	-0.43264
																	3.9772	1.27324	-0.96061	0.417081	0.029299	-0.06303	-0.98774	-0.06448	0.617634	0.998841	-1.65074	0.124424		3.9772	0.376706	-1.43183	-0.5685	-0.57092
																	4.0016	1.28561	-0.92251	0.396543	0.039642	-0.06906	-1.02782	-0.01222	0.618376	1.06259	-1.56546	0.120814		4.0016	0.367933	-1.46406	-0.4592	-0.68764
																	4.026	1.30969	-0.90372	0.375179	0.050029	-0.0821	-1.07384	0.038586	0.619346	1.09882	-1.48659	0.120422		4.026	0.381928	-1.4733	-0.36137	-0.75441
																	4.0504	1.34292	-0.89605	0.351184	0.062079	-0.09874	-1.10937	0.078075	0.628468	1.09614	-1.42265	0.123687		4.0504	0.401872	-1.44134	-0.28323	-0.76591
																	4.0748	1.37377	-0.8935	0.326338	0.075465	-0.11137	-1.12393	0.096881	0.655324	1.05656	-1.37921	0.132381		4.0748	0.412679	-1.36064	-0.23477	-0.74271
																	4.0992	1.38697	-0.89464	0.305807	0.085303	-0.11321	-1.11939	0.092506	0.705131	0.995438	-1.35793	0.147935		4.0992	0.409601	-1.24724	-0.22582	-0.71208
																	4.1236	1.37187	-0.90099	0.297306	0.086939	-0.10155	-1.10663	0.06905	0.774811	0.932717	-1.3577	0.168053		4.1236	0.401293	-1.13791	-0.25692	-0.69338
																	4.148	1.32786	-0.91345	0.307641	0.084809	-0.0781	-1.09824	0.033377	0.852468	0.8834	-1.37613	0.188934		4.148	0.392471	-1.07095	-0.31366	-0.69914
																	4.1724	1.26504	-0.92576	0.338631	0.089784	-0.04962	-1.10332	-0.00558	0.923476	0.850739	-1.41048	0.211453		4.1724	0.374149	-1.06606	-0.37685	-0.73441
																	4.1968	1.20023	-0.92617	0.386548	0.107904	-0.02532	-1.1226	-0.03692	0.978036	0.828486	-1.45611	0.242087		4.1968	0.33855	-1.11626	-0.43633	-0.7929
																	4.2212	1.15141	-0.90744	0.44349	0.137425	-0.01085	-1.14705	-0.05197	1.01143	0.809952	-1.50516	0.289019		4.2212	0.294683	-1.19118	-0.49106	-0.85838
																	4.2456	1.13043	-0.8715	0.49798	0.170873	-0.00599	-1.16359	-0.04877	1.01868	0.792896	-1.54953	0.358063		4.2456	0.266675	-1.25608	-0.53926	-0.90888
																	4.27	1.13511	-0.82657	0.537598	0.195554	-0.00893	-1.16316	-0.03147	0.993496	0.778138	-1.5848	0.446395		4.27	0.278129	-1.29571	-0.57359	-0.92481
																	4.2944	1.14913	-0.78131	0.55524	0.200517	-0.01919	-1.14503	-0.0072	0.934972	0.767977	-1.61092	0.538853		4.2944	0.337514	-1.31653	-0.58938	-0.89951
																	4.3188	1.15142	-0.7404	0.552525	0.184555	-0.03564	-1.11526	0.015656	0.85322	0.765549	-1.6294	0.614402		4.3188	0.436112	-1.33503	-0.59515	-0.84081
																	4.3432	1.1262	-0.70705	0.536826	0.152276	-0.05657	-1.0827	0.029479	0.766236	0.770964	-1.64101	0.655828		4.3432	0.546346	-1.37106	-0.60646	-0.76153
																	4.3676	1.06778	-0.68582	0.51736	0.106605	-0.08169	-1.05646	0.031163	0.693409	0.778678	-1.646	0.656882		4.3676	0.620244	-1.43926	-0.62759	-0.66863
																	4.392	0.980979	-0.67757	0.501882	0.049231	-0.11061	-1.04325	0.024567	0.650182	0.781118	-1.64521	0.625797		4.392	0.616862	-1.53542	-0.64792	-0.56291
																	4.4164	0.87887	-0.6768	0.491763	-0.01449	-0.14131	-1.04507	0.01843	0.641376	0.772827	-1.64162	0.581233		4.4164	0.540345	-1.63254	-0.65311	-0.44646
																	4.4408	0.776757	-0.67557	0.481284	-0.07161	-0.1718	-1.05975	0.018521	0.658278	0.751215	-1.63861	0.543394		4.4408	0.43427	-1.69753	-0.63314	-0.32519
																	4.4652	0.685869	-0.66631	0.464623	-0.10575	-0.20252	-1.08311	0.019531	0.684838	0.714426	-1.63485	0.525255		4.4652	0.340911	-1.71478	-0.58608	-0.20862
																	4.4896	0.611722	-0.64441	0.441398	-0.10892	-0.23746	-1.11015	0.008478	0.70842	0.660617	-1.6248	0.527379		4.4896	0.274878	-1.69418	-0.51715	-0.11074
																	4.514	0.555036	-0.61127	0.415307	-0.08539	-0.28115	-1.13473	-0.02203	0.725096	0.593128	-1.60506	0.539973		4.514	0.230704	-1.66446	-0.43362	-0.04764
																	4.5384	0.511611	-0.57535	0.39092	-0.04558	-0.33127	-1.15056	-0.06647	0.734468	0.52291	-1.57547	0.551102		4.5384	0.204763	-1.65708	-0.34222	-0.03264
																	4.5628	0.474367	-0.54932	0.371666	-0.0032	-0.37698	-1.15383	-0.11039	0.733516	0.46171	-1.53575	0.554561		4.5628	0.20057	-1.68255	-0.24969	-0.07248
																	4.5872	0.438801	-0.54278	0.358414	0.025016	-0.40709	-1.14513	-0.13978	0.71836	0.415132	-1.48672	0.547597		4.5872	0.21844	-1.72112	-0.16172	-0.16601
																	4.6116	0.403342	-0.55604	0.350012	0.025462	-0.4175	-1.13085	-0.14856	0.689274	0.383721	-1.43293	0.524768		4.6116	0.252125	-1.74296	-0.08154	-0.30359
																	4.636	0.366432	-0.58005	0.345872	-0.00533	-0.41187	-1.12215	-0.13998	0.653819	0.368796	-1.38002	0.48584		4.636	0.29572	-1.73347	-0.01301	-0.46252
																	4.6604	0.330928	-0.60164	0.347057	-0.06098	-0.3981	-1.12743	-0.12442	0.625319	0.37278	-1.33159	0.445795		4.6604	0.346874	-1.69943	0.037038	-0.6065
																	4.6848	0.305131	-0.61057	0.353376	-0.12912	-0.38284	-1.14346	-0.11583	0.615912	0.393532	-1.28937	0.427537		4.6848	0.40281	-1.66017	0.063137	-0.7005
																	4.7092	0.291929	-0.60401	0.36103	-0.19575	-0.36715	-1.15855	-0.12506	0.631925	0.424243	-1.25377	0.449929		4.7092	0.459031	-1.63293	0.06452	-0.72961
																	4.7336	0.283455	-0.58656	0.366697	-0.25122	-0.34653	-1.16473	-0.15441	0.673161	0.458751	-1.22228	0.520697		4.7336	0.5071	-1.62043	0.044906	-0.70462
																	4.758	0.269387	-0.56739	0.372576	-0.29412	-0.31685	-1.16238	-0.197	0.730547	0.493059	-1.18741	0.628096		4.758	0.527566	-1.61064	0.01313	-0.65348
																	4.7824	0.246537	-0.5575	0.383537	-0.33005	-0.28061	-1.15634	-0.23976	0.787183	0.52454	-1.13963	0.740913		4.7824	0.500847	-1.58852	-0.01833	-0.60846
																	4.8068	0.219636	-0.56642	0.401172	-0.36649	-0.24497	-1.15232	-0.26865	0.827319	0.551083	-1.07594	0.823667		4.8068	0.429393	-1.54738	-0.03933	-0.59444
																	4.8312	0.196681	-0.59615	0.423382	-0.40798	-0.21577	-1.15483	-0.27455	0.843669	0.568765	-1.00249	0.850915		4.8312	0.327154	-1.48969	-0.045	-0.61936
																	4.8556	0.186002	-0.63999	0.447153	-0.45323	-0.19664	-1.16826	-0.25756	0.835491	0.57229	-0.92682	0.813633		4.8556	0.19389	-1.42648	-0.03362	-0.67577
																	4.88	0.193476	-0.69053	0.470649	-0.49346	-0.19169	-1.19578	-0.22848	0.805588	0.559595	-0.85083	0.723468		4.88	0.024363	-1.37946	-0.00775	-0.75202
																	4.9044	0.218963	-0.74562	0.494746	-0.5167	-0.20474	-1.23198	-0.20434	0.760907	0.5367	-0.77242	0.608911		4.9044	-0.16745	-1.37223	0.023088	-0.83547
																	4.9288	0.256563	-0.80522	0.522957	-0.51686	-0.23372	-1.26333	-0.19776	0.709297	0.517014	-0.69165	0.499846		4.9288	-0.35235	-1.41379	0.04717	-0.90817
																	4.9532	0.299842	-0.86443	0.559879	-0.49544	-0.26811	-1.27789	-0.20913	0.656798	0.513091	-0.61463	0.412177		4.9532	-0.50574	-1.49215	0.058292	-0.9514
																	4.9776	0.348211	-0.91184	0.608856	-0.45635	-0.29472	-1.26728	-0.23049	0.610982	0.530322	-0.55128	0.346414		4.9776	-0.61374	-1.58026	0.058208	-0.96231
																	5.002	0.406666	-0.93674	0.669077	-0.40499	-0.30563	-1.22441	-0.25558	0.580238	0.567611	-0.51013	0.299227		5.002	-0.67205	-1.64904	0.054045	-0.96155
																															0.573406	-0.95752	-0.92376	-0.54562
																															0.465224	-0.90096	-0.95951	-0.46733
																															0.374115	-0.88014	-1.00884	-0.37373
																															0.308573	-0.89133	-1.07195	-0.26632
																															0.26171	-0.91735	-1.14225	-0.15106
																															0.213475	-0.94083	-1.20926	-0.04559
																															0.141503	-0.95683	-1.26494	0.02712
																															0.034954	-0.97243	-1.3035	0.053448
																															-0.09471	-0.99615	-1.32004	0.035161
																															-0.21705	-1.02874	-1.31527	-0.01619
																															-0.29777	-1.06087	-1.29874	-0.08621
																															-0.31171	-1.07699	-1.2832	-0.1592
																															-0.25176	-1.06812	-1.27594	-0.21759
																															-0.13367	-1.04489	-1.2779	-0.24501
																															0.009421	-1.03034	-1.28697	-0.23637
																															0.14209	-1.03978	-1.29435	-0.20442
																															0.24048	-1.07242	-1.2842	-0.16736
																															0.295302	-1.1158	-1.24513	-0.13219
																															0.306172	-1.15824	-1.17993	-0.09611
																															0.280077	-1.19711	-1.10445	-0.05979
																															0.235602	-1.2323	-1.03842	-0.0325
																															0.193558	-1.25991	-0.99427	-0.02224
																															0.159985	-1.27785	-0.97417	-0.02788
																															0.127021	-1.29193	-0.97629	-0.04453
																															0.091726	-1.31086	-0.99843	-0.06631
																															0.073559	-1.33654	-1.03597	-0.08353
																															0.105139	-1.36011	-1.08162	-0.08867
																															0.199931	-1.36647	-1.12454	-0.08486
																															0.335565	-1.34867	-1.14865	-0.08204
																															0.469331	-1.31706	-1.13974	-0.08746
																															0.563601	-1.28997	-1.09343	-0.10534
																															0.59716	-1.28262	-1.01417	-0.142
																															0.567493	-1.30217	-0.91213	-0.20633
																															0.495771	-1.34262	-0.79908	-0.30456
																															0.421326	-1.38931	-0.68312	-0.43264
																															0.376706	-1.43183	-0.5685	-0.57092
																															0.367933	-1.46406	-0.4592	-0.68764
																															0.381928	-1.4733	-0.36137	-0.75441
																															0.401872	-1.44134	-0.28323	-0.76591
																															0.412679	-1.36064	-0.23477	-0.74271
																															0.409601	-1.24724	-0.22582	-0.71208
																															0.401293	-1.13791	-0.25692	-0.69338
																															0.392471	-1.07095	-0.31366	-0.69914
																															0.374149	-1.06606	-0.37685	-0.73441
																															0.33855	-1.11626	-0.43633	-0.7929
																															0.294683	-1.19118	-0.49106	-0.85838
																															0.266675	-1.25608	-0.53926	-0.90888
																															0.278129	-1.29571	-0.57359	-0.92481
																															0.337514	-1.31653	-0.58938	-0.89951
																															0.436112	-1.33503	-0.59515	-0.84081
																															0.546346	-1.37106	-0.60646	-0.76153
																															0.620244	-1.43926	-0.62759	-0.66863
																															0.616862	-1.53542	-0.64792	-0.56291
																															0.540345	-1.63254	-0.65311	-0.44646
																															0.43427	-1.69753	-0.63314	-0.32519
																															0.340911	-1.71478	-0.58608	-0.20862
																															0.274878	-1.69418	-0.51715	-0.11074
																															0.230704	-1.66446	-0.43362	-0.04764
																															0.204763	-1.65708	-0.34222	-0.03264
																															0.20057	-1.68255	-0.24969	-0.07248
																															0.21844	-1.72112	-0.16172	-0.16601
																															0.252125	-1.74296	-0.08154	-0.30359
																															0.29572	-1.73347	-0.01301	-0.46252
																															0.346874	-1.69943	0.037038	-0.6065
																															0.40281	-1.66017	0.063137	-0.7005
																															0.459031	-1.63293	0.06452	-0.72961
																															0.5071	-1.62043	0.044906	-0.70462
																															0.527566	-1.61064	0.01313	-0.65348
																															0.500847	-1.58852	-0.01833	-0.60846
																															0.429393	-1.54738	-0.03933	-0.59444
																															0.327154	-1.48969	-0.045	-0.61936
																															0.19389	-1.42648	-0.03362	-0.67577
																															0.024363	-1.37946	-0.00775	-0.75202
																															-0.16745	-1.37223	0.023088	-0.83547
																															-0.35235	-1.41379	0.04717	-0.90817
																															-0.50574	-1.49215	0.058292	-0.9514
																															-0.61374	-1.58026	0.058208	-0.96231
																															-0.67205	-1.64904	0.054045	-0.96155
