# Supplementary material for: Learning of probabilistic punishment as a model of anxiety produces changes in action but not punisher encoding in the dmPFC and VTA
Source: eLife. 2022 Sep 14;11:e78912. doi: 10.7554/eLife.78912 (PMC9525102; doi:10.7554/eLife.78912)
Supplement: Figure 5—source data 1. [file elife-78912-fig5-data1.xlsx]

## Sheet: Figure5A-B,5SA-B
5A-right and Supplement 5-1A												5B-right and Supplement 5-1B												5C-right and Supplement 5-1C
Metric: percent trials completed												Metric: latency to action											Metric: latency to retrieval
				Session: Saline											Session: Saline											Session: Saline
Subj	318	320	321	251	252	256	283				Subj	318	320	321	251	252	256	283				Subj	318	320	321	251	252	256	283
No risk	100	100	100	100	100	100	100				No risk	3.33333	3.542	2.444	2.38	2.848	2.44467	1.394				No risk	1.06414	1.73172	1.60345	1.58138	1.73655	1.53379	1.86069
Risk	100	100	100	100	100	58.3333	100				Risk	2.594	40.579	30.668	53.8307	1.82	247.787	39.0947				Risk	1.24759	1.56717	1.17241	1.34724	1.41276	1.64034	1.30345
				Session: Diazepam											Session: Diazepam											Session: Diazepam
	318	320	321	251	252	256	283					318	320	321	251	252	256	283					318	320	321	251	252	256	283
No risk	100	100	100	100	100	100	100				No risk	4.916	19.844	2.20867	75.2147	14.7407	3.78333	0.968667				No risk	1.08966	2.28759	1.79793	2.29793	1.9	3.15724	2.32207
Risk	100	100	100	100	100	55	100				Risk	1.76133	8.91133	4.27233	2.32233	3.244	189.473	22.727				Risk	1.05035	1.2992	1.36172	1.80862	1.41552	1.56931	1.51
