# Supplementary material for: Learning of probabilistic punishment as a model of anxiety produces changes in action but not punisher encoding in the dmPFC and VTA
Source: eLife. 2022 Sep 14;11:e78912. doi: 10.7554/eLife.78912 (PMC9525102; doi:10.7554/eLife.78912)
Supplement: Figure 6—source data 1. [file elife-78912-fig6-data1.xlsx]

## Sheet: Figure6 A-C
																						CUE DMPFC
		Block (1=0%, 2= 6%, 3 = 10%)	1	1	1	1	1	1	1	2	2	2	2	2	2	2	3	3	3	3	3	3	3	1	1	1	1	1	1	1	2	2	2	2	2	2	2	3	3	3	3	3	3	3			Block (1=0%, 2= 6%, 3 = 10%)	1	1
		Session	Diazepam	Diazepam	Diazepam	Diazepam	Diazepam	Diazepam	Diazepam	Diazepam	Diazepam	Diazepam	Diazepam	Diazepam	Diazepam	Diazepam	Diazepam	Diazepam	Diazepam	Diazepam	Diazepam	Diazepam	Diazepam	Saline	Saline	Saline	Saline	Saline	Saline	Saline	Saline	Saline	Saline	Saline	Saline	Saline	Saline	Saline	Saline	Saline	Saline	Saline	Saline	Saline			Session	Diazepam	Diazepam
		Subject	S251	S252	S256	S283	S318	S320	S321	S251	S252	S256	S283	S318	S320	S321	S251	S252	S256	S283	S318	S320	S321	S251	S252	S256	S283	S318	S320	S321	S251	S252	S256	S283	S318	S320	S321	S251	S252	S256	S283	S318	S320	S321			Subject	S251	S252
			z-score df/f	z-score df/f	z-score df/f	z-score df/f	z-score df/f	z-score df/f	z-score df/f	z-score df/f	z-score df/f	z-score df/f	z-score df/f	z-score df/f	z-score df/f	z-score df/f	z-score df/f	z-score df/f	z-score df/f	z-score df/f	z-score df/f	z-score df/f	z-score df/f	z-score df/f	z-score df/f	z-score df/f	z-score df/f	z-score df/f	z-score df/f	z-score df/f	z-score df/f	z-score df/f	z-score df/f	z-score df/f	z-score df/f	z-score df/f	z-score df/f	z-score df/f	z-score df/f	z-score df/f	z-score df/f	z-score df/f	z-score df/f	z-score df/f				z-score df/f	z-score df/f
		Peri-cue time -sec																																													peri-action time -sec
		-1.5128	0.133041	-0.357028	-0.508244	-0.416193	-0.245814	0.0949631	-0.849492	1.35003	0.688846	1.10764	-0.511163	-0.021171	0.493512	0.586562	0.357625	-0.144269	-0.0473851	0.117563	0.187807	0.305977	0.293644	-0.397014	0.00260091	-0.102477	0.105408	-0.209033	-0.485763	0.808051	0.197959	-0.353345	-0.18676	0.555138	-0.0822278	-0.35633	-0.633409	0.414021	0.168425	0.931471	-0.406516	-0.0303482	0.966452	0.111004			-2.0008	0.0339346	0.433508
		-1.4884	0.15536	-0.338887	-0.526711	-0.393674	-0.265032	0.0923682	-0.843535	1.34332	0.738321	1.15049	-0.510769	-0.0225665	0.520725	0.618914	0.347396	-0.146931	-0.0722036	0.095346	0.165527	0.337157	0.315306	-0.40593	-0.0172244	-0.109637	0.115079	-0.252391	-0.478991	0.822127	0.194061	-0.281943	-0.172649	0.517162	-0.0848875	-0.379912	-0.632303	0.458216	0.196874	1.02286	-0.396052	-0.0732185	0.974252	0.113609			-1.9764	0.0207409	0.488482
		-1.464	0.179828	-0.346131	-0.535695	-0.375173	-0.285108	0.0870943	-0.837078	1.33496	0.802008	1.19939	-0.505034	-0.0242394	0.553625	0.653972	0.340054	-0.177183	-0.0934194	0.0764312	0.149474	0.362931	0.37208	-0.41892	-0.0477997	-0.116905	0.115698	-0.29416	-0.470145	0.811513	0.196169	-0.199791	-0.152161	0.476866	-0.0807324	-0.407707	-0.632064	0.514677	0.216199	1.1177	-0.384419	-0.13061	0.990164	0.135239			-1.952	0.00609651	0.550871
		-1.4396	0.208301	-0.369329	-0.535922	-0.36111	-0.306828	0.0797406	-0.82609	1.3249	0.884013	1.25093	-0.495628	-0.0290348	0.592441	0.675014	0.333986	-0.228239	-0.109417	0.0614123	0.138438	0.374577	0.449016	-0.436234	-0.0911854	-0.126722	0.107778	-0.332153	-0.46223	0.780373	0.203509	-0.112818	-0.127207	0.433298	-0.0672633	-0.440967	-0.633384	0.579045	0.224202	1.20788	-0.369979	-0.198267	1.01571	0.164527			-1.9276	-0.0117531	0.60534
		-1.4152	0.242342	-0.401317	-0.531624	-0.351712	-0.331718	0.0728806	-0.806392	1.31263	0.982653	1.30375	-0.48431	-0.0400995	0.636654	0.674935	0.327816	-0.288497	-0.124958	0.0517669	0.128136	0.365556	0.520543	-0.457242	-0.147841	-0.14061	0.0922799	-0.363787	-0.457751	0.734464	0.213625	-0.0265984	-0.100315	0.386794	-0.0427619	-0.479561	-0.629834	0.645322	0.222522	1.28377	-0.35194	-0.271148	1.05255	0.188387			-1.9032	-0.0342213	0.638948
		-1.3908	0.282556	-0.436652	-0.529514	-0.346748	-0.361059	0.0693473	-0.775291	1.29805	1.09029	1.35725	-0.47314	-0.060079	0.683276	0.65215	0.320844	-0.35043	-0.148326	0.0492427	0.113486	0.336454	0.563684	-0.480345	-0.215033	-0.158493	0.0703663	-0.386259	-0.45797	0.67716	0.223471	0.0534044	-0.0734656	0.339603	-0.00720309	-0.52153	-0.612336	0.707569	0.215075	1.33597	-0.329609	-0.343964	1.10117	0.201475			-1.8788	-0.0617628	0.647209
		-1.3664	0.328202	-0.467797	-0.535243	-0.345523	-0.394978	0.071548	-0.729729	1.28216	1.19882	1.4088	-0.463797	-0.0901852	0.727247	0.605175	0.313358	-0.410538	-0.183858	0.054608	0.0910181	0.295719	0.568949	-0.503486	-0.287277	-0.178937	0.0435451	-0.397091	-0.462719	0.612001	0.230832	0.121627	-0.0473329	0.295111	0.0376791	-0.563888	-0.579957	0.761578	0.206337	1.35943	-0.301666	-0.411971	1.15957	0.206824			-1.8544	-0.0937032	0.632302
		-1.342	0.377298	-0.486163	-0.549372	-0.3472	-0.432113	0.0813368	-0.668128	1.2673	1.3027	1.45403	-0.456292	-0.130173	0.763202	0.532902	0.306784	-0.465615	-0.227624	0.0668022	0.0599016	0.256052	0.542082	-0.524726	-0.357654	-0.198954	0.0137721	-0.394632	-0.47141	0.54605	0.235108	0.172866	-0.0217125	0.25634	0.0888116	-0.604245	-0.540617	0.805899	0.199537	1.35652	-0.26716	-0.471541	1.22367	0.208229			-1.83	-0.128468	0.600825
		-1.3176	0.427141	-0.488714	-0.56665	-0.351189	-0.469522	0.0996634	-0.597622	1.25669	1.39706	1.48981	-0.448515	-0.179082	0.787493	0.438964	0.303135	-0.512934	-0.270961	0.0833479	0.0219989	0.228268	0.497038	-0.542576	-0.419079	-0.213378	-0.0168994	-0.37824	-0.483798	0.486737	0.236982	0.203393	0.00339339	0.224878	0.142422	-0.642016	-0.50352	0.841749	0.196148	1.33571	-0.226973	-0.519974	1.28898	0.203827			-1.8056	-0.163968	0.562547
		-1.2932	0.474928	-0.480193	-0.579281	-0.357079	-0.503292	0.125474	-0.535019	1.25384	1.47376	1.51499	-0.437549	-0.235384	0.800065	0.335124	0.303848	-0.549936	-0.308296	0.102106	-0.0192839	0.215489	0.450876	-0.556015	-0.466627	-0.215451	-0.0468178	-0.348437	-0.499588	0.43876	0.237432	0.211916	0.0271157	0.200656	0.194787	-0.678363	-0.473677	0.871948	0.195951	1.30786	-0.183478	-0.55553	1.35123	0.189237			-1.7812	-0.197993	0.527308
		-1.2688	0.518204	-0.469982	-0.58244	-0.364225	-0.530166	0.154554	-0.498159	1.26174	1.52194	1.52911	-0.421512	-0.296481	0.804427	0.237912	0.308938	-0.572248	-0.339417	0.122741	-0.0606793	0.213186	0.421877	-0.564277	-0.499859	-0.199564	-0.0748326	-0.307307	-0.518038	0.405334	0.236893	0.199577	0.0480236	0.182612	0.242789	-0.715114	-0.45166	0.899505	0.197199	1.283	-0.139128	-0.578057	1.40611	0.166719			-1.7568	-0.228557	0.502888
		-1.2444	0.555038	-0.465696	-0.577419	-0.371655	-0.548647	0.180041	-0.497146	1.2822	1.53495	1.53242	-0.400002	-0.358961	0.804503	0.16122	0.31685	-0.573864	-0.363711	0.146078	-0.0996725	0.215338	0.420937	-0.566688	-0.52277	-0.164581	-0.100012	-0.25868	-0.537763	0.388888	0.235108	0.168639	0.0649842	0.169961	0.284151	-0.753173	-0.433852	0.92651	0.197343	1.2666	-0.0957326	-0.588883	1.45006	0.149481			-1.7324	-0.254029	0.490431
		-1.22	0.584037	-0.465862	-0.569268	-0.378362	-0.55895	0.19498	-0.531359	1.31569	1.51589	1.52645	-0.373244	-0.419612	0.801001	0.114934	0.324756	-0.549541	-0.376801	0.172085	-0.134068	0.219332	0.440694	-0.562765	-0.540938	-0.114824	-0.121386	-0.207583	-0.556666	0.389141	0.231637	0.120725	0.0776181	0.163136	0.317386	-0.791201	-0.41268	0.953786	0.194179	1.25792	-0.0544688	-0.589898	1.48155	0.155135			-1.708	-0.273054	0.481197
		-1.1956	0.604388	-0.460777	-0.562156	-0.383465	-0.562384	0.195541	-0.591102	1.36176	1.47716	1.51268	-0.341784	-0.475568	0.791427	0.10608	0.329239	-0.498459	-0.375137	0.198775	-0.161907	0.225642	0.457874	-0.552371	-0.557873	-0.0579121	-0.13794	-0.159431	-0.572843	0.402534	0.226581	0.0567454	0.0858983	0.163867	0.341475	-0.825778	-0.382716	0.981221	0.187492	1.25369	-0.0163216	-0.58311	1.50117	0.191715			-1.6836	-0.284441	0.465711
		-1.1712	0.61613	-0.443032	-0.557244	-0.386079	-0.560128	0.182375	-0.66034	1.41935	1.43463	1.49128	-0.307185	-0.523497	0.772425	0.13315	0.327344	-0.427622	-0.361031	0.222503	-0.18231	0.23539	0.449703	-0.535599	-0.573391	-0.00202884	-0.14891	-0.119434	-0.58559	0.423751	0.220991	-0.0212523	0.089622	0.174476	0.355771	-0.853145	-0.346987	1.0084	0.180895	1.25235	0.017491	-0.570667	1.51123	0.252817			-1.6592	-0.287123	0.445909
		-1.1468	0.620511	-0.416574	-0.553746	-0.38525	-0.55188	0.159111	-0.721951	1.48693	1.398	1.46199	-0.272258	-0.5598	0.741127	0.181479	0.317471	-0.351928	-0.341347	0.238896	-0.196235	0.249228	0.410662	-0.512492	-0.585386	0.0456432	-0.15429	-0.0920695	-0.595222	0.446092	0.216688	-0.10804	0.0888814	0.196682	0.360189	-0.871116	-0.313535	1.0352	0.181506	1.25256	0.0461506	-0.554684	1.51511	0.328436			-1.6348	-0.280289	0.43462
		-1.1224	0.620009	-0.392884	-0.550655	-0.380196	-0.5356	0.13028	-0.765316	1.56218	1.36502	1.42584	-0.240223	-0.582455	0.69616	0.22987	0.299616	-0.288347	-0.321396	0.244249	-0.206284	0.268374	0.354613	-0.482825	-0.592602	0.0799637	-0.155021	-0.0806231	-0.602454	0.461728	0.215613	-0.194336	0.085367	0.230549	0.3549	-0.879895	-0.287488	1.06221	0.196508	1.24933	0.0706396	-0.536815	1.51579	0.410837			-1.6104	-0.263885	0.443341
		-1.098	0.617799	-0.376989	-0.546789	-0.370546	-0.509047	0.100092	-0.789018	1.64188	1.32602	1.38542	-0.213731	-0.592337	0.63876	0.264365	0.27499	-0.246509	-0.300508	0.236811	-0.215574	0.295619	0.30052	-0.446093	-0.594721	0.0981308	-0.152464	-0.0868437	-0.608169	0.463192	0.219123	-0.268386	0.0824244	0.274135	0.339902	-0.881623	-0.26739	1.09049	0.228916	1.23365	0.0941136	-0.518154	1.51522	0.488665			-1.586	-0.239191	0.472182
		-1.0736	0.616956	-0.360013	-0.539548	-0.356409	-0.472009	0.0719538	-0.797982	1.72188	1.27287	1.34313	-0.194541	-0.592395	0.573164	0.285611	0.245398	-0.223634	-0.275066	0.21709	-0.226586	0.333367	0.259802	-0.401719	-0.590999	0.098895	-0.147605	-0.11072	-0.613482	0.445415	0.227624	-0.319511	0.0829806	0.323632	0.315755	-0.879046	-0.248285	1.12084	0.275403	1.19629	0.120695	-0.499901	1.5152	0.54732			-1.5616	-0.208666	0.51284
		-1.0492	0.6198	-0.326529	-0.525036	-0.338472	-0.426998	0.048063	-0.799651	1.79731	1.20443	1.29934	-0.183742	-0.585863	0.50639	0.302092	0.212713	-0.208146	-0.244986	0.187255	-0.240892	0.380668	0.235033	-0.349431	-0.579919	0.0820472	-0.140701	-0.150476	-0.619451	0.40765	0.240729	-0.340996	0.0878655	0.373813	0.284808	-0.874245	-0.228	1.15302	0.327345	1.13221	0.153972	-0.483595	1.51822	0.577263			-1.5372	-0.174971	0.556945
		-1.0248	0.627528	-0.268187	-0.500329	-0.318103	-0.377966	0.0284276	-0.799627	1.863	1.12602	1.25377	-0.181968	-0.57533	0.447132	0.320368	0.178726	-0.186603	-0.215895	0.150207	-0.259278	0.43302	0.222908	-0.289705	-0.559181	0.0490297	-0.131447	-0.202898	-0.626427	0.351387	0.257862	-0.33118	0.0963809	0.418963	0.251334	-0.868311	-0.207041	1.1855	0.373913	1.04218	0.196215	-0.470298	1.5269	0.579239			-1.5128	-0.140064	0.599643
		-1.0004	0.640186	-0.191053	-0.465574	-0.296958	-0.329059	0.0114487	-0.798282	1.91444	1.04444	1.20846	-0.189145	-0.563051	0.403414	0.342969	0.145148	-0.147774	-0.196721	0.108885	-0.281779	0.484702	0.220288	-0.224063	-0.527556	0.0040885	-0.119219	-0.264105	-0.633923	0.276598	0.278812	-0.293037	0.107425	0.45404	0.220466	-0.8621	-0.184722	1.21591	0.405933	0.932308	0.248184	-0.460235	1.54247	0.562952			-1.4884	-0.104937	0.639585
		-0.976	0.657003	-0.111475	-0.424128	-0.276259	-0.284933	-0.0035231	-0.793143	1.94872	0.964356	1.16734	-0.203999	-0.551271	0.379203	0.370474	0.11336	-0.08519	-0.195021	0.0663529	-0.307847	0.531284	0.228526	-0.15492	-0.488439	-0.04494	-0.10336	-0.330298	-0.640946	0.185441	0.303757	-0.232498	0.119453	0.475542	0.19666	-0.857328	-0.162499	1.24145	0.418716	0.812054	0.30911	-0.453361	1.56491	0.539524			-1.464	-0.0697653	0.675397
		-0.9516	0.676953	-0.0465334	-0.381855	-0.256603	-0.250967	-0.0154259	-0.784387	1.96504	0.888835	1.13282	-0.22426	-0.54166	0.372119	0.401396	0.0840455	0.000438763	-0.212676	0.0259848	-0.336363	0.570345	0.24805	-0.0850412	-0.449682	-0.0877258	-0.0836517	-0.397771	-0.64647	0.0881997	0.332704	-0.157145	0.130194	0.481795	0.182612	-0.856378	-0.148054	1.25917	0.411496	0.690126	0.376697	-0.449561	1.59408	0.514264			-1.4396	-0.0342383	0.701697
		-0.9272	0.699148	-0.00768668	-0.346179	-0.238346	-0.231437	-0.0228837	-0.773494	1.96459	0.820075	1.10519	-0.247501	-0.53488	0.375506	0.428636	0.0571071	0.100178	-0.244566	-0.00923312	-0.365789	0.60134	0.275391	-0.0169156	-0.420092	-0.115076	-0.0604855	-0.462595	-0.649928	-0.000393451	0.364717	-0.0765572	0.137121	0.472913	0.17927	-0.860698	-0.150643	1.26617	0.385161	0.571773	0.447111	-0.448338	1.62978	0.485394			-1.4152	0.00197703	0.711324
		-0.9028	0.7229	0.00108667	-0.323235	-0.221711	-0.227405	-0.0246902	-0.758293	1.94999	0.759593	1.08591	-0.271668	-0.531081	0.382718	0.44199	0.0320573	0.197886	-0.280935	-0.037571	-0.394502	0.626498	0.313241	0.04777	-0.407069	-0.122182	-0.0345512	-0.520579	-0.65101	-0.0708626	0.397589	-0.00219047	0.138078	0.450748	0.186328	-0.869923	-0.174013	1.26024	0.341824	0.460326	0.515362	-0.448748	1.67129	0.447378			-1.3908	0.0387326	0.700705
		-0.8784	0.747584	-0.0155607	-0.314492	-0.206552	-0.236557	-0.019035	-0.735522	1.92487	0.707298	1.07897	-0.295202	-0.530384	0.388729	0.438709	0.00860561	0.277534	-0.312764	-0.0584288	-0.420799	0.650425	0.37445	0.108449	-0.414593	-0.108514	-0.00648741	-0.567502	-0.648973	-0.124412	0.428408	0.0548148	0.131814	0.41861	0.202629	-0.882293	-0.215013	1.24106	0.285023	0.359974	0.576218	-0.449658	1.71654	0.398429			-1.3664	0.0751242	0.672343
		-0.854	0.772376	-0.0445212	-0.317048	-0.192596	-0.254423	-0.00364399	-0.708082	1.89363	0.65801	1.08881	-0.316857	-0.532593	0.389315	0.426068	-0.0130785	0.333608	-0.33608	-0.0716346	-0.443127	0.677445	0.467636	0.165646	-0.441868	-0.075942	0.0232289	-0.599727	-0.642853	-0.170286	0.454748	0.0862371	0.118731	0.38053	0.226793	-0.895143	-0.266883	1.21144	0.218233	0.275373	0.62513	-0.449929	1.76161	0.346583			-1.342	0.109727	0.634024
		-0.8296	0.795938	-0.0704802	-0.327576	-0.180115	-0.275668	0.022264	-0.686359	1.86128	0.601646	1.11758	-0.335432	-0.536852	0.380397	0.412871	-0.0325544	0.372131	-0.351059	-0.0770722	-0.461025	0.709859	0.583211	0.220594	-0.485063	-0.0278188	0.0542937	-0.615218	-0.632359	-0.216981	0.475616	0.08932	0.101261	0.340363	0.257986	-0.905519	-0.320573	1.17746	0.14392	0.209108	0.658944	-0.448575	1.80187	0.304456			-1.3176	0.141159	0.595207
		-0.8052	0.816305	-0.0852402	-0.344949	-0.170094	-0.295183	0.0561283	-0.679354	1.83311	0.531095	1.16387	-0.349941	-0.542081	0.358894	0.403692	-0.0494058	0.40069	-0.358615	-0.0747008	-0.475437	0.747369	0.69359	0.274601	-0.539358	0.0309094	0.0865107	-0.614529	-0.618185	-0.262986	0.491675	0.0689148	0.0829993	0.301326	0.296242	-0.911441	-0.363998	1.14725	0.0646776	0.161137	0.67652	-0.445097	1.83405	0.277793			-1.2932	0.168579	0.563582
		-0.7808	0.831147	-0.0922066	-0.36887	-0.163942	-0.308876	0.0931344	-0.686547	1.81367	0.449119	1.22325	-0.360095	-0.547703	0.32452	0.398847	-0.0633967	0.417143	-0.36079	-0.0647233	-0.487514	0.786789	0.767899	0.328385	-0.598997	0.093829	0.119505	-0.601169	-0.601833	-0.295648	0.50481	0.0359977	0.0667745	0.265958	0.341881	-0.912622	-0.385468	1.12879	-0.0157058	0.13045	0.67899	-0.439687	1.85668	0.264685			-1.2688	0.192022	0.544344
		-0.7564	0.838378	-0.10255	-0.397926	-0.163369	-0.314125	0.129774	-0.702203	1.8058	0.366538	1.29008	-0.366582	-0.553741	0.280442	0.395168	-0.0746517	0.409049	-0.362129	-0.0478446	-0.497409	0.823465	0.791707	0.381747	-0.657575	0.154558	0.152502	-0.580941	-0.585362	-0.301021	0.517394	0.00228971	0.0530448	0.235936	0.39408	-0.909869	-0.379661	1.12785	-0.0931793	0.117102	0.669375	-0.433029	1.86951	0.265276			-1.2444	0.212468	0.537094
		-0.732	0.836741	-0.124858	-0.42969	-0.170249	-0.309959	0.165619	-0.723645	1.81056	0.295967	1.36014	-0.370843	-0.560503	0.231987	0.387557	-0.0839125	0.368454	-0.364814	-0.025571	-0.50422	0.853386	0.770637	0.43385	-0.709433	0.209131	0.184536	-0.560343	-0.570979	-0.274272	0.531735	-0.025008	0.0401648	0.211933	0.449428	-0.904528	-0.349195	1.14683	-0.165014	0.123366	0.651558	-0.425724	1.87316	0.285129			-1.22	0.231558	0.532343
		-0.7076	0.826086	-0.158801	-0.461236	-0.186128	-0.296747	0.2016	-0.752932	1.82777	0.24735	1.43214	-0.374428	-0.568277	0.184583	0.37286	-0.0924858	0.304416	-0.364913	-0.000247721	-0.506731	0.873798	0.721062	0.483641	-0.750916	0.257034	0.214798	-0.544726	-0.560479	-0.221294	0.54998	-0.0458231	0.0265141	0.193959	0.501862	-0.898451	-0.300816	1.18473	-0.229241	0.152295	0.629176	-0.417698	1.86841	0.329446			-1.1956	0.251143	0.516652
		-0.6832	0.807388	-0.200382	-0.489725	-0.211661	-0.275393	0.237859	-0.792335	1.85649	0.226259	1.50618	-0.378382	-0.577038	0.142477	0.354877	-0.101711	0.237309	-0.357528	0.0254388	-0.504277	0.88372	0.665474	0.529766	-0.780615	0.29982	0.242846	-0.537032	-0.554869	-0.154374	0.574106	-0.0650953	0.0121206	0.181738	0.544464	-0.89376	-0.240232	1.23786	-0.283823	0.205711	0.605368	-0.40841	1.8558	0.396726			-1.1712	0.272839	0.481076
		-0.6588	0.782587	-0.247006	-0.513067	-0.24631	-0.246913	0.273364	-0.837585	1.89495	0.234055	1.58188	-0.383162	-0.586573	0.108566	0.344469	-0.112442	0.185749	-0.341843	0.0490609	-0.497037	0.885257	0.625186	0.57027	-0.798754	0.338522	0.26864	-0.537557	-0.554623	-0.0867038	0.605466	-0.0862258	-0.00183267	0.174594	0.571842	-0.892344	-0.171154	1.30098	-0.328614	0.28464	0.582957	-0.397469	1.83698	0.476527			-1.1468	0.297517	0.423615
		-0.6344	0.75413	-0.294145	-0.52936	-0.288306	-0.212562	0.306742	-0.878156	1.9403	0.267848	1.65838	-0.389126	-0.596966	0.0844369	0.353291	-0.125033	0.157257	-0.319138	0.068693	-0.485992	0.883488	0.608188	0.602804	-0.806771	0.372373	0.292307	-0.544847	-0.560262	-0.0278532	0.643984	-0.106981	-0.0138803	0.171105	0.581436	-0.895305	-0.100851	1.36837	-0.367139	0.388642	0.564145	-0.384703	1.81562	0.552987			-1.1224	0.324896	0.348146
		-0.61	0.724331	-0.336045	-0.536054	-0.334832	-0.173818	0.337384	-0.905067	1.98877	0.319242	1.73463	-0.396966	-0.608756	0.0700469	0.387229	-0.139641	0.146255	-0.28889	0.0830577	-0.473224	0.883909	0.608595	0.625329	-0.807557	0.400151	0.313739	-0.556884	-0.572498	0.0172801	0.687602	-0.121844	-0.0220146	0.169216	0.57359	-0.902846	-0.0423769	1.43437	-0.40383	0.511706	0.550063	-0.370027	1.79699	0.60914			-1.098	0.353727	0.26214
		-0.5856	0.695047	-0.373184	-0.530141	-0.382471	-0.132341	0.365637	-0.913453	2.03632	0.375116	1.80856	-0.407588	-0.622565	0.0635305	0.442349	-0.156495	0.143117	-0.249574	0.0917935	-0.462006	0.888991	0.61654	0.636938	-0.805893	0.422314	0.332398	-0.571712	-0.592005	0.0464076	0.732419	-0.12684	-0.0237397	0.166876	0.551161	-0.91508	-0.0061639	1.49384	-0.438905	0.640466	0.540311	-0.353351	1.78706	0.631255			-1.0736	0.382391	0.171361
		-0.5612	0.667834	-0.412684	-0.509454	-0.427592	-0.0902616	0.3919	-0.900392	2.07948	0.422306	1.87541	-0.421896	-0.638638	0.061775	0.505971	-0.176089	0.142159	-0.202532	0.0956585	-0.456039	0.896282	0.623485	0.638458	-0.807288	0.441485	0.347479	-0.587525	-0.619075	0.0593934	0.773576	-0.122803	-0.0174568	0.162584	0.519176	-0.932505	0.00722696	1.54243	-0.467301	0.758435	0.532504	-0.334582	1.7914	0.617077			-1.0492	0.409272	0.0764614
		-0.5368	0.644136	-0.45963	-0.474705	-0.466493	-0.0503909	0.416603	-0.86707	2.11576	0.453396	1.92877	-0.440865	-0.656663	0.061846	0.5637	-0.199147	0.138371	-0.15247	0.0965639	-0.45827	0.900166	0.622933	0.632479	-0.814837	0.461418	0.358226	-0.602491	-0.653214	0.0604551	0.80667	-0.115573	-0.00394452	0.155406	0.483779	-0.954845	0.00442065	1.57656	-0.482596	0.852199	0.522925	-0.314093	1.81411	0.579438			-1.0248	0.432909	-0.0227344
		-0.5124	0.62497	-0.511808	-0.430022	-0.495696	-0.0159428	0.44207	-0.819995	2.14379	0.470655	1.96502	-0.465387	-0.676161	0.0624961	0.606225	-0.226251	0.124599	-0.106812	0.0972378	-0.469987	0.895859	0.611784	0.622724	-0.827977	0.485824	0.364082	-0.614659	-0.692788	0.0576286	0.82927	-0.113487	0.0137176	0.144906	0.450266	-0.980223	-0.0074266	1.59344	-0.482378	0.914574	0.508304	-0.293157	1.85663	0.540038			-1.0004	0.452319	-0.122914
		-0.488	0.610172	-0.56385	-0.380524	-0.512567	0.0103673	0.473097	-0.766003	2.16298	0.484645	1.98586	-0.495616	-0.697055	0.0641027	0.631527	-0.257457	0.0970462	-0.0754953	0.100107	-0.490489	0.880962	0.589911	0.613063	-0.844577	0.517245	0.364547	-0.62201	-0.735217	0.0569193	0.841787	-0.123979	0.0321118	0.131172	0.421651	-1.00641	-0.0240486	1.59192	-0.471509	0.944201	0.487117	-0.273865	1.91764	0.51847			-0.976	0.4672	-0.220116
		-0.4636	0.597892	-0.612092	-0.329272	-0.515809	0.0270769	0.51348	-0.710536	2.17337	0.504842	1.99605	-0.530386	-0.719392	0.0676784	0.645013	-0.29214	0.0600966	-0.0672479	0.106074	-0.517447	0.854684	0.561748	0.606509	-0.862611	0.556016	0.358859	-0.622441	-0.777751	0.0568043	0.847243	-0.150635	0.0494855	0.11456	0.398472	-1.03191	-0.0421947	1.57343	-0.459881	0.943006	0.460017	-0.258709	1.99464	0.519544			-0.9516	0.477697	-0.312786
		-0.4392	0.584994	-0.652801	-0.27661	-0.505534	0.0340348	0.562522	-0.662925	2.17569	0.530379	2.00117	-0.567339	-0.742326	0.0747428	0.659156	-0.328901	0.0224704	-0.0868868	0.11466	-0.54801	0.818445	0.539015	0.604382	-0.880261	0.600171	0.345873	-0.613846	-0.817814	0.0502861	0.850136	-0.192025	0.0661929	0.0955347	0.379184	-1.0556	-0.058955	1.54152	-0.45662	0.913574	0.429719	-0.249985	2.08463	0.530266			-0.9272	0.484125	-0.401143
		-0.4148	0.568171	-0.679461	-0.221674	-0.483139	0.0323129	0.617029	-0.635903	2.17135	0.552999	2.00654	-0.603671	-0.763851	0.0868618	0.686652	-0.36552	-0.00849782	-0.135473	0.125318	-0.580148	0.776758	0.53325	0.605895	-0.896108	0.646379	0.324628	-0.594389	-0.852583	0.0314791	0.854925	-0.242258	0.0842496	0.074959	0.360668	-1.07644	-0.0751595	1.50012	-0.466137	0.860255	0.399914	-0.249405	2.18267	0.53418			-0.9028	0.486973	-0.484718
		-0.3904	0.545047	-0.688114	-0.163147	-0.451332	0.0238271	0.675639	-0.636657	2.16226	0.567318	2.01539	-0.636889	-0.781632	0.104003	0.728215	-0.399103	-0.0270707	-0.207646	0.138282	-0.613009	0.735363	0.545229	0.608441	-0.909121	0.691052	0.295252	-0.56282	-0.878573	-0.00126952	0.864512	-0.291918	0.106414	0.0540871	0.339122	-1.09424	-0.0943839	1.45206	-0.487401	0.791762	0.374005	-0.258072	2.28127	0.525846			-0.8784	0.486947	-0.559317
		-0.366	0.514893	-0.685116	-0.0992189	-0.413952	0.0101011	0.738876	-0.664178	2.15036	0.57534	2.02766	-0.665018	-0.794146	0.123724	0.770064	-0.426474	-0.0293434	-0.288864	0.154072	-0.645777	0.698483	0.56521	0.608428	-0.918559	0.73114	0.259215	-0.519067	-0.892069	-0.0448152	0.879126	-0.330145	0.134434	0.0340415	0.311439	-1.10987	-0.117148	1.39888	-0.516355	0.717747	0.354896	-0.276419	2.37243	0.50918			-0.854	0.484847	-0.618469
		-0.3416	0.478831	-0.682492	-0.0295207	-0.375019	-0.00869654	0.806491	-0.715368	2.13708	0.584018	2.04056	-0.686539	-0.801161	0.142306	0.79464	-0.444583	-0.0136106	-0.358034	0.17248	-0.676225	0.668601	0.578126	0.602312	-0.92502	0.764625	0.218762	-0.464884	-0.890583	-0.0916671	0.896317	-0.348304	0.167841	0.015333	0.276082	-1.12472	-0.140373	1.34165	-0.550454	0.641919	0.345129	-0.303852	2.4505	0.488			-0.8296	0.481264	-0.658092
		-0.3172	0.439227	-0.685701	0.0428993	-0.337494	-0.032999	0.876833	-0.785729	2.12286	0.600278	2.04906	-0.700396	-0.802905	0.156314	0.79084	-0.45079	0.0221128	-0.395881	0.192408	-0.700885	0.647234	0.567328	0.587641	-0.930881	0.79106	0.176143	-0.403926	-0.873661	-0.134353	0.912439	-0.342651	0.20489	-0.00233637	0.233041	-1.14028	-0.163569	1.28215	-0.590236	0.560349	0.346518	-0.338641	2.51276	0.464619			-0.8052	0.476237	-0.678104
		-0.2928	0.398591	-0.689917	0.113324	-0.302759	-0.0622161	0.947052	-0.862962	2.10719	0.627058	2.04731	-0.706083	-0.798488	0.163267	0.754811	-0.443227	0.0780028	-0.394232	0.212692	-0.717141	0.634418	0.522159	0.563759	-0.938695	0.812349	0.132999	-0.341066	-0.841921	-0.170785	0.924649	-0.314535	0.244365	-0.0198406	0.183893	-1.158	-0.191493	1.2232	-0.635925	0.465119	0.359747	-0.378397	2.55794	0.444478			-0.7808	0.469083	-0.682635
		-0.2684	0.358706	-0.685252	0.178781	-0.270861	-0.0943285	1.0127	-0.927603	2.08913	0.663699	2.03189	-0.703965	-0.785142	0.161662	0.685626	-0.421394	0.146946	-0.357408	0.232867	-0.725161	0.628925	0.445345	0.531755	-0.950513	0.83302	0.0900707	-0.281184	-0.796104	-0.205178	0.931931	-0.269159	0.285945	-0.0381431	0.132087	-1.179	-0.22874	1.16807	-0.684915	0.349568	0.384305	-0.42064	2.58549	0.434271			-0.7564	0.458649	-0.680804
		-0.244	0.320275	-0.664831	0.238411	-0.240882	-0.126898	1.06932	-0.964427	2.06801	0.709349	2.00409	-0.695602	-0.759574	0.151158	0.585553	-0.38662	0.216862	-0.295681	0.253142	-0.727513	0.629736	0.350138	0.493948	-0.969061	0.858996	0.0473965	-0.228074	-0.737705	-0.243443	0.934755	-0.213452	0.328873	-0.0582182	0.0821661	-1.20368	-0.274981	1.11985	-0.733746	0.213264	0.418522	-0.462745	2.59644	0.434426			-0.732	0.443998	-0.685124
		-0.2196	0.283081	-0.632118	0.290947	-0.211394	-0.158081	1.11604	-0.972819	2.04431	0.764775	1.96869	-0.683439	-0.720643	0.133098	0.465912	-0.342012	0.280315	-0.219109	0.273846	-0.726876	0.635886	0.252568	0.453428	-0.997224	0.895069	0.00472219	-0.184125	-0.669667	-0.28729	0.93425	-0.154156	0.370675	-0.0813151	0.0381494	-1.23197	-0.327177	1.08114	-0.780302	0.0637343	0.459884	-0.501382	2.59357	0.43691			-0.7076	0.425094	-0.704426
		-0.1952	0.246556	-0.600661	0.333773	-0.181252	-0.186977	1.15701	-0.964907	2.01991	0.829636	1.92971	-0.670044	-0.670487	0.110396	0.347754	-0.291971	0.3398	-0.135851	0.295135	-0.724568	0.644948	0.168147	0.413686	-1.03509	0.942733	-0.0381136	-0.150527	-0.595745	-0.333888	0.931666	-0.0970974	0.407589	-0.108898	0.00247222	-1.26379	-0.383437	1.0536	-0.823385	-0.0858879	0.505705	-0.532385	2.58071	0.432143			-0.6832	0.403024	-0.737435
		-0.1708	0.210446	-0.584766	0.364663	-0.150227	-0.212957	1.19783	-0.954061	1.99755	0.898883	1.88838	-0.657467	-0.612885	0.0862886	0.254137	-0.241341	0.403111	-0.0529804	0.317087	-0.721313	0.653424	0.111044	0.378307	-1.07851	1.00001	-0.0808254	-0.127341	-0.519657	-0.380236	0.928198	-0.0467699	0.436479	-0.142176	-0.0245938	-1.29895	-0.442136	1.03729	-0.861871	-0.221118	0.553713	-0.551617	2.56264	0.415959			-0.6588	0.379742	-0.778638
		-0.1464	0.175205	-0.591445	0.383493	-0.118883	-0.234268	1.24107	-0.947368	1.97976	0.965301	1.84533	-0.646904	-0.551308	0.0630472	0.202775	-0.194225	0.475412	0.0226159	0.339713	-0.718207	0.659004	0.0907265	0.350777	-1.12082	1.06292	-0.122422	-0.113343	-0.445048	-0.424901	0.9249	-0.00566081	0.456266	-0.181552	-0.0454511	-1.33652	-0.499792	1.03006	-0.894095	-0.330669	0.602316	-0.556338	2.54456	0.388764			-0.6344	0.35774	-0.829791
		-0.122	0.141956	-0.621468	0.39267	-0.0880826	-0.247975	1.28575	-0.945932	1.96787	1.02506	1.8023	-0.638403	-0.488671	0.0419535	0.200637	-0.15284	0.555806	0.0838303	0.362821	-0.715958	0.660639	0.107544	0.334179	-1.15506	1.12714	-0.161115	-0.106038	-0.375697	-0.465704	0.922656	0.0262104	0.467808	-0.226312	-0.0644508	-1.37439	-0.553646	1.02724	-0.917175	-0.408626	0.650701	-0.546095	2.53036	0.353469			-0.61	0.339834	-0.90069
		-0.0976	0.112095	-0.674262	0.396078	-0.0587953	-0.252047	1.32959	-0.946363	1.96171	1.07826	1.76153	-0.630747	-0.42769	0.0240309	0.240973	-0.117211	0.637467	0.124379	0.386045	-0.714025	0.656375	0.153419	0.330649	-1.17577	1.18908	-0.194507	-0.102297	-0.315032	-0.498675	0.922111	0.0510824	0.473127	-0.274728	-0.085862	-1.40978	-0.604987	1.02224	-0.928291	-0.452539	0.698655	-0.522397	2.52112	0.316589			-0.5856	0.32883	-0.999973
		-0.0732	0.0867662	-0.748778	0.396397	-0.0322805	-0.247209	1.37004	-0.941922	1.96002	1.1251	1.72479	-0.622204	-0.370707	0.0102594	0.310488	-0.0860257	0.708669	0.139903	0.408812	-0.711423	0.644159	0.217864	0.340885	-1.18107	1.24647	-0.220228	-0.099422	-0.265116	-0.520928	0.923425	0.0717026	0.474611	-0.324372	-0.112331	-1.44074	-0.656477	1.00829	-0.927401	-0.459928	0.746088	-0.48741	2.515	0.286411			-0.5612	0.326996	-1.12823
		-0.0488	0.0665432	-0.843125	0.393536	-0.0102086	-0.236135	1.40355	-0.924805	1.96135	1.16267	1.69237	-0.611948	-0.319267	0.00137384	0.398566	-0.0579057	0.755329	0.127703	0.430213	-0.708041	0.625009	0.291748	0.363963	-1.17332	1.29831	-0.236777	-0.0958899	-0.226136	-0.533884	0.926117	0.0891109	0.473849	-0.37241	-0.144273	-1.46692	-0.706754	0.980426	-0.917165	-0.427302	0.792422	-0.442895	2.50871	0.268849			-0.5368	0.335503	-1.27909
		-0.0244	0.0514707	-0.95574	0.386914	0.005682	-0.221195	1.42476	-0.889682	1.96474	1.18526	1.66314	-0.601003	-0.273437	-0.00202847	0.494627	-0.0320706	0.766237	0.0884188	0.449428	-0.705013	0.602636	0.364775	0.397536	-1.157	1.34402	-0.243997	-0.0913066	-0.196548	-0.542863	0.929198	0.103087	0.470976	-0.415714	-0.179611	-1.48917	-0.749979	0.936792	-0.900056	-0.353424	0.836099	-0.39028	2.49926	0.267423			-0.5124	0.354062	-1.44478
		0	0.0412864	-1.08221	0.378264	0.0142778	-0.203569	1.42863	-0.839168	1.97013	1.18786	1.63692	-0.592068	-0.231637	0.000617129	0.58434	-0.00821449	0.742335	0.028183	0.466084	-0.703994	0.580175	0.424319	0.438367	-1.13594	1.38206	-0.242869	-0.0858551	-0.173438	-0.552278	0.931305	0.114092	0.465497	-0.450798	-0.214309	-1.50848	-0.77963	0.878857	-0.877813	-0.242107	0.875108	-0.331245	2.485	0.284817			-0.488	0.381029	-1.62307
		0.0244	0.0355601	-1.21164	0.370926	0.0156561	-0.183982	1.41451	-0.786416	1.97835	1.17058	1.61412	-0.588383	-0.19174	0.00897847	0.6552	0.0138779	0.702781	-0.0441039	0.479842	-0.706111	0.558819	0.459626	0.482921	-1.113	1.40927	-0.234843	-0.0801574	-0.153549	-0.560346	0.930645	0.123496	0.457415	-0.474073	-0.243888	-1.52557	-0.791053	0.810759	-0.853387	-0.10074	0.90857	-0.268043	2.4658	0.317901			-0.4636	0.413932	-1.82045
		0.0488	0.0335876	-1.33073	0.367414	0.0111448	-0.163568	1.38831	-0.749356	1.9903	1.14132	1.59199	-0.592315	-0.152133	0.0213271	0.699496	0.0348144	0.677302	-0.122236	0.490379	-0.711609	0.538955	0.462229	0.527869	-1.09161	1.42194	-0.221243	-0.0755926	-0.134711	-0.560725	0.925068	0.133176	0.447581	-0.482665	-0.264918	-1.54139	-0.782172	0.738225	-0.830679	0.0612585	0.937509	-0.203477	2.44268	0.351391			-0.4392	0.449946	-2.04574
		0.0732	0.0341651	-1.42916	0.368933	0.00292307	-0.143608	1.36028	-0.741568	2.00585	1.11362	1.5649	-0.604495	-0.111859	0.0364916	0.711295	0.0561116	0.689985	-0.204688	0.498094	-0.720001	0.521862	0.424441	0.570576	-1.0764	1.41739	-0.202957	-0.0739721	-0.116397	-0.54997	0.912555	0.146018	0.437726	-0.474931	-0.275723	-1.55737	-0.754825	0.667302	-0.811827	0.231433	0.963999	-0.140533	2.41714	0.365812			-0.4148	0.486011	-2.30265
		0.0976	0.0356958	-1.49986	0.377151	-0.00654574	-0.124397	1.3408	-0.766556	2.02332	1.09994	1.53007	-0.623798	-0.0703533	0.0557003	0.689207	0.0802847	0.745704	-0.291928	0.504073	-0.729819	0.510122	0.344635	0.609549	-1.0717	1.39466	-0.180115	-0.0765765	-0.0995078	-0.529752	0.891948	0.165471	0.42986	-0.450047	-0.276251	-1.57488	-0.71396	0.603383	-0.795455	0.394835	0.989919	-0.0821156	2.39074	0.355485			-0.3904	0.518994	-2.58912
		0.122	0.0368449	-1.5376	0.39509	-0.0151838	-0.104945	1.33726	-0.817816	2.04006	1.10569	1.49025	-0.647592	-0.0268197	0.0813744	0.643197	0.11031	0.827392	-0.3844	0.509088	-0.738268	0.505978	0.233731	0.644625	-1.07967	1.35485	-0.151983	-0.0833304	-0.0859077	-0.503325	0.863467	0.1934	0.424765	-0.407391	-0.267569	-1.59422	-0.662665	0.550879	-0.777649	0.538352	1.0165	-0.0312205	2.36551	0.334694			-0.366	0.546139	-2.8942
		0.1464	0.0372743	-1.53924	0.425539	-0.0219206	-0.0839444	1.35234	-0.882174	2.05369	1.12908	1.44989	-0.672006	0.0200384	0.115079	0.59184	0.148806	0.908684	-0.482132	0.512828	-0.741792	0.509192	0.115836	0.676735	-1.09959	1.30116	-0.117363	-0.0924879	-0.0776164	-0.475979	0.82871	0.228852	0.421474	-0.346696	-0.251698	-1.61465	-0.601241	0.513392	-0.754584	0.654848	1.04479	0.00894943	2.34414	0.326643			-0.3416	0.565571	-3.19453
		0.1708	0.0378379	-1.50661	0.469071	-0.0269598	-0.0606086	1.38328	-0.943606	2.06342	1.16493	1.41113	-0.692472	0.0711348	0.157247	0.550832	0.197396	0.971172	-0.581136	0.513822	-0.737358	0.517248	0.0197479	0.707324	-1.12829	1.23789	-0.0749384	-0.101276	-0.0762015	-0.456817	0.790159	0.268578	0.419197	-0.268912	-0.231757	-1.63566	-0.53301	0.49384	-0.724658	0.743033	1.07632	0.035201	2.32929	0.3481			-0.3172	0.576497	-3.46179
		0.1952	0.0401656	-1.44953	0.523123	-0.0317134	-0.0345849	1.42306	-0.989389	2.07055	1.20888	1.37391	-0.704527	0.125771	0.207699	0.527398	0.256544	1.01115	-0.672588	0.509586	-0.722825	0.528331	-0.0356921	0.737811	-1.1608	1.16955	-0.0233856	-0.107126	-0.0825877	-0.452059	0.750582	0.30773	0.419591	-0.17723	-0.211696	-1.65758	-0.466915	0.493984	-0.688804	0.80464	1.11263	0.044791	2.32278	0.400799			-0.2928	0.579191	-3.67226
		0.2196	0.0460376	-1.38334	0.582597	-0.0384945	-0.0054836	1.46337	-1.01452	2.07771	1.25995	1.33855	-0.704455	0.181374	0.264645	0.522592	0.325761	1.03462	-0.749959	0.497089	-0.696437	0.54298	-0.0477908	0.769297	-1.19118	1.10059	0.0383124	-0.10844	-0.0966857	-0.457192	0.712755	0.34088	0.426385	-0.0776211	-0.195816	-1.68024	-0.414234	0.513284	-0.649505	0.843846	1.15389	0.036177	2.32562	0.472893			-0.2684	0.574881	-3.80853
		0.244	0.0568466	-1.32121	0.642076	-0.0499763	0.0272664	1.49825	-1.02058	2.08755	1.31926	1.30739	-0.689798	0.234729	0.322651	0.533554	0.403886	1.04976	-0.811205	0.473712	-0.657299	0.561992	-0.0237778	0.802377	-1.2137	1.03473	0.110198	-0.104886	-0.117164	-0.462312	0.679512	0.36415	0.442757	0.0218179	-0.188617	-1.70166	-0.384357	0.547663	-0.609887	0.868786	1.19819	0.00980301	2.33806	0.547096			-0.244	0.565586	-3.86035
		0.2684	0.0731979	-1.27014	0.697666	-0.0685217	0.0641888	1.52623	-1.0132	2.10164	1.38689	1.28396	-0.659966	0.283584	0.373095	0.554444	0.489373	1.06315	-0.85279	0.438324	-0.606475	0.584103	0.0279464	0.836954	-1.22372	0.974574	0.190502	-0.0975716	-0.142123	-0.465085	0.653708	0.376431	0.469165	0.112488	-0.194273	-1.71874	-0.37896	0.589449	-0.572291	0.888868	1.24208	-0.0317364	2.35924	0.608753			-0.2196	0.553982	-3.82612
		0.2928	0.0947473	-1.23471	0.747217	-0.095629	0.105351	1.54919	-0.999364	2.12023	1.45974	1.27092	-0.616865	0.326766	0.408207	0.577652	0.580398	1.0764	-0.868925	0.39202	-0.546797	0.606563	0.1021	0.872141	-1.21797	0.921746	0.275207	-0.0885975	-0.169759	-0.474027	0.637825	0.378118	0.503088	0.187163	-0.215241	-1.72861	-0.388135	0.629219	-0.536476	0.908896	1.28176	-0.0841118	2.38644	0.648864			-0.1952	0.543231	-3.70934
		0.3172	0.120344	-1.21878	0.790496	-0.131822	0.149881	1.56929	-0.983313	2.14251	1.53098	1.26953	-0.565129	0.363227	0.425038	0.595282	0.674687	1.08473	-0.855805	0.337883	-0.481672	0.627734	0.195646	0.906361	-1.19492	0.877123	0.358692	-0.0798504	-0.198046	-0.499458	0.633361	0.369958	0.539938	0.241398	-0.251014	-1.72848	-0.397645	0.658538	-0.499548	0.928651	1.31423	-0.141837	2.41523	0.661387			-0.1708	0.536664	-3.51699
		0.3416	0.148359	-1.21804	0.829036	-0.176939	0.195895	1.58782	-0.963455	2.16703	1.59306	1.28051	-0.511262	0.391913	0.426372	0.598958	0.769471	1.08278	-0.813972	0.279692	-0.414205	0.649139	0.306413	0.937601	-1.15518	0.840938	0.435306	-0.0720442	-0.224752	-0.543939	0.640406	0.353023	0.574243	0.2736	-0.297855	-1.71588	-0.399538	0.671901	-0.457858	0.947705	1.33786	-0.198942	2.44147	0.641687			-0.1464	0.537445	-3.26532
		0.366	0.177118	-1.21615	0.863693	-0.23043	0.241247	1.60587	-0.934533	2.19227	1.64095	1.3036	-0.461722	0.412285	0.419077	0.579985	0.861837	1.07044	-0.748608	0.220905	-0.346989	0.674334	0.430867	0.963777	-1.10171	0.813147	0.500737	-0.0646993	-0.248336	-0.601125	0.657703	0.327609	0.601344	0.283955	-0.349449	-1.69015	-0.392618	0.667285	-0.40961	0.967614	1.35211	-0.249668	2.46284	0.591596			-0.122	0.548239	-2.98305
		0.3904	0.205425	-1.19461	0.893309	-0.291351	0.284208	1.62402	-0.891737	2.21698	1.6702	1.33583	-0.421374	0.424245	0.411424	0.533866	0.949333	1.05423	-0.666573	0.164541	-0.282467	0.705603	0.560297	0.983002	-1.03942	0.793997	0.552443	-0.0565041	-0.268306	-0.662168	0.68305	0.291528	0.619011	0.273737	-0.398096	-1.65337	-0.37837	0.64557	-0.355797	0.990307	1.35734	-0.28928	2.4792	0.522904			-0.0976	0.570772	-2.7057
		0.4148	0.232884	-1.14522	0.917855	-0.358019	0.323256	1.64226	-0.833694	2.2401	1.67537	1.371	-0.393373	0.428105	0.410876	0.465265	1.03068	1.04542	-0.573782	0.113061	-0.223363	0.743118	0.68077	0.993854	-0.973494	0.784029	0.589324	-0.0456131	-0.285212	-0.720806	0.71388	0.240787	0.628059	0.245489	-0.435888	-1.60956	-0.359775	0.609618	-0.298976	1.01666	1.3547	-0.315155	2.49205	0.451476			-0.0732	0.605426	-2.46855
		0.4392	0.259862	-1.07225	0.940611	-0.427695	0.357049	1.66065	-0.764797	2.26021	1.654	1.40232	-0.379836	0.425177	0.422984	0.38889	1.10606	1.05072	-0.476702	0.0677665	-0.172374	0.786636	0.776598	0.995706	-0.907492	0.783547	0.611135	-0.0302388	-0.300655	-0.771199	0.747915	0.17293	0.632024	0.20298	-0.456008	-1.56358	-0.341237	0.563633	-0.243902	1.04539	1.34562	-0.327544	2.50333	0.390738			-0.0488	0.651045	-2.30003
		0.4636	0.287259	-0.987383	0.965278	-0.496859	0.384983	1.67907	-0.693818	2.27503	1.61191	1.42585	-0.382259	0.418057	0.451114	0.323323	1.17659	1.06377	-0.38237	0.0284269	-0.13131	0.835437	0.83421	0.988897	-0.842843	0.792091	0.618134	-0.00934233	-0.316482	-0.80602	0.783724	0.0888587	0.635401	0.150589	-0.45433	-1.52056	-0.327303	0.512563	-0.198795	1.07218	1.33143	-0.329452	2.51416	0.350917			-0.0244	0.704907	-2.21243
		0.488	0.316262	-0.903424	0.993021	-0.561983	0.407358	1.69743	-0.630844	2.28159	1.56274	1.44099	-0.401268	0.410367	0.496254	0.279143	1.24344	1.07166	-0.295075	-0.00619245	-0.100492	0.887079	0.847494	0.974653	-0.779812	0.807806	0.611228	0.0173668	-0.33407	-0.820498	0.821122	-0.00847036	0.640805	0.0927374	-0.430801	-1.48511	-0.319662	0.461242	-0.172718	1.09144	1.31331	-0.325777	2.52447	0.33624			0	0.762961	-2.19859
		0.5124	0.347893	-0.827963	1.02265	-0.620118	0.424879	1.71682	-0.586214	2.27721	1.52133	1.44933	-0.435983	0.406107	0.556137	0.253094	1.30716	1.06887	-0.214233	-0.0373798	-0.078727	0.938351	0.823191	0.954945	-0.718934	0.827287	0.592326	0.049891	-0.354504	-0.815499	0.8612	-0.11467	0.647752	0.0333043	-0.390069	-1.46014	-0.31678	0.413598	-0.17117	1.09902	1.29232	-0.322009	2.53361	0.342097			0.0244	0.820597	-2.2401
		0.5368	0.382407	-0.7606	1.05184	-0.669232	0.437825	1.73902	-0.568803	2.26046	1.49923	1.45307	-0.483948	0.408514	0.625143	0.233419	1.36782	1.06116	-0.136118	-0.065775	-0.0637543	0.986676	0.777583	0.932348	-0.661141	0.846375	0.564489	0.0880295	-0.378499	-0.795594	0.905832	-0.222901	0.654116	-0.025155	-0.340435	-1.44632	-0.317024	0.372437	-0.19357	1.09183	1.26941	-0.322629	2.5417	0.358777			0.0488	0.873834	-2.3177
		0.5612	0.41907	-0.695649	1.0788	-0.708505	0.445619	1.76463	-0.581369	2.23167	1.50443	1.45231	-0.542236	0.419312	0.696152	0.208442	1.42531	1.05676	-0.0580463	-0.0909121	-0.0528352	1.02996	0.72594	0.909802	-0.606663	0.861097	0.531548	0.131118	-0.406176	-0.765829	0.956821	-0.324272	0.65813	-0.0818486	-0.290911	-1.44236	-0.319834	0.339643	-0.234173	1.06619	1.24491	-0.329492	2.55058	0.375244			0.0732	0.920022	-2.4151
		0.5856	0.456543	-0.62749	1.10304	-0.738348	0.447638	1.79302	-0.616865	2.19269	1.53767	1.44459	-0.608755	0.438772	0.762488	0.170706	1.47946	1.058	0.0203274	-0.111316	-0.0430377	1.06609	0.679062	0.890272	-0.554967	0.868225	0.49719	0.177965	-0.4377	-0.730293	1.01498	-0.410038	0.65939	-0.137279	-0.248076	-1.44534	-0.324721	0.31622	-0.285295	1.01877	1.21822	-0.340863	2.56286	0.380069			0.0976	0.957563	-2.51803
		0.61	0.493486	-0.556043	1.12341	-0.759865	0.444277	1.82341	-0.662432	2.14623	1.58781	1.4284	-0.682421	0.466214	0.818908	0.116722	1.52988	1.06138	0.0993635	-0.125536	-0.0313057	1.09212	0.64626	0.876204	-0.506543	0.865858	0.464037	0.226948	-0.473823	-0.693197	1.0793	-0.473857	0.659265	-0.192203	-0.21469	-1.45127	-0.331672	0.302182	-0.339234	0.949235	1.1882	-0.351674	2.57995	0.36288			0.122	0.985247	-2.6134
		0.6344	0.528933	-0.489136	1.13678	-0.774138	0.436923	1.85537	-0.706768	2.09493	1.63464	1.40637	-0.762291	0.500725	0.862033	0.0489695	1.57567	1.05909	0.18081	-0.133444	-0.0150359	1.10429	0.632708	0.868793	-0.464291	0.854333	0.43336	0.275969	-0.515064	-0.660075	1.14679	-0.513202	0.660829	-0.246773	-0.190504	-1.45609	-0.341681	0.296614	-0.388922	0.862152	1.15403	-0.355085	2.6019	0.317187			0.1464	1.00191	-2.69065
		0.6588	0.562347	-0.43785	1.13947	-0.78195	0.427472	1.88882	-0.741876	2.04063	1.65838	1.38563	-0.846641	0.541285	0.890151	-0.0202953	1.61555	1.03904	0.267855	-0.136741	0.00680642	1.10069	0.630632	0.867459	-0.432647	0.836546	0.405344	0.322425	-0.560576	-0.636084	1.21334	-0.528471	0.667596	-0.300106	-0.174085	-1.45726	-0.353583	0.298209	-0.427859	0.765773	1.116	-0.344856	2.62837	0.242722			0.1708	1.00661	-2.74355
		0.6832	0.593494	-0.409543	1.12936	-0.784027	0.418129	1.9232	-0.760638	1.98403	1.6494	1.37518	-0.932734	0.586174	0.902807	-0.073706	1.64838	0.988785	0.363864	-0.13823	0.0328106	1.08354	0.619674	0.870087	-0.415174	0.816819	0.379505	0.36354	-0.607907	-0.623046	1.27507	-0.520388	0.681943	-0.350153	-0.163789	-1.45429	-0.362192	0.306156	-0.449989	0.668202	1.07587	-0.317353	2.65879	0.142549			0.1952	0.999148	-2.77067
		0.7076	0.622282	-0.4062	1.10702	-0.781326	0.411035	1.95664	-0.756029	1.92509	1.61205	1.38056	-1.01723	0.63268	0.90093	-0.10153	1.67336	0.901368	0.46892	-0.14046	0.0594247	1.05818	0.583249	0.873914	-0.412512	0.799419	0.355315	0.396766	-0.653338	-0.618848	1.3292	-0.490224	0.70454	-0.393964	-0.157389	-1.44779	-0.362276	0.320498	-0.452567	0.575414	1.0366	-0.272238	2.69186	0.0197062			0.2196	0.980442	-2.7754
		0.732	0.648607	-0.425013	1.07553	-0.775103	0.407549	1.98709	-0.724854	1.86348	1.55888	1.40133	-1.09661	0.677357	0.887338	-0.106915	1.68996	0.778537	0.57612	-0.144999	0.0827183	1.03006	0.52001	0.876404	-0.422246	0.788156	0.333007	0.419954	-0.692572	-0.62029	1.37436	-0.443194	0.734166	-0.428482	-0.151969	-1.4385	-0.351552	0.341242	-0.438476	0.492957	1.00146	-0.211893	2.726	-0.11916			0.244	0.952578	-2.764
		0.7564	0.672138	-0.456063	1.03949	-0.766775	0.407527	2.01401	-0.672454	1.79896	1.49999	1.43407	-1.1675	0.716441	0.866602	-0.0991968	1.69797	0.630191	0.669637	-0.152956	0.100424	1.00413	0.437507	0.875577	-0.440975	0.786176	0.313879	0.431705	-0.72205	-0.626944	1.41069	-0.389053	0.767687	-0.451501	-0.145161	-1.42691	-0.32993	0.367144	-0.413822	0.42773	0.973217	-0.140515	2.76011	-0.261152			0.2684	0.918477	-2.74331
		0.7808	0.692126	-0.481918	1.00386	-0.757557	0.409265	2.03866	-0.612249	1.73168	1.43716	1.47511	-1.22708	0.746596	0.843532	-0.0851387	1.6976	0.473365	0.731412	-0.16576	0.112692	0.985921	0.343138	0.869912	-0.466233	0.795103	0.299724	0.431628	-0.740264	-0.641186	1.43987	-0.338019	0.801293	-0.462129	-0.136514	-1.41287	-0.299444	0.395606	-0.385704	0.387041	0.953304	-0.0633387	2.7931	-0.39064			0.2928	0.881323	-2.7208
		0.8052	0.707527	-0.483832	0.972842	-0.748122	0.410471	2.06287	-0.560519	1.66223	1.36861	1.52056	-1.27356	0.766099	0.821122	-0.0641711	1.68925	0.331554	0.755975	-0.185096	0.121263	0.980319	0.243237	0.858326	-0.495594	0.814401	0.291856	0.419956	-0.747962	-0.663332	1.46434	-0.297158	0.832355	-0.46058	-0.12755	-1.3959	-0.264451	0.423543	-0.362555	0.376376	0.941005	0.0141821	2.82317	-0.491599			0.3172	0.843842	-2.7041
		0.8296	0.717351	-0.45101	0.948336	-0.73876	0.409537	2.0881	-0.530818	1.59137	1.29556	1.56684	-1.30643	0.775379	0.799818	-0.0322082	1.6734	0.227551	0.755527	-0.211999	0.128233	0.988755	0.145668	0.840358	-0.525276	0.841474	0.29043	0.39729	-0.747275	-0.688059	1.48596	-0.271097	0.859706	-0.447868	-0.120492	-1.37607	-0.229065	0.448195	-0.35245	0.398192	0.933669	0.0869372	2.84852	-0.550129			0.3416	0.807626	-2.69939
		0.854	0.72081	-0.38768	0.928867	-0.729881	0.406149	2.11536	-0.530059	1.51964	1.22112	1.61216	-1.32638	0.776029	0.778386	0.00898277	1.65062	0.172683	0.749549	-0.245622	0.135299	1.00908	0.0612016	0.816358	-0.55166	0.872175	0.294398	0.364982	-0.740561	-0.708236	1.50488	-0.264836	0.882047	-0.425894	-0.116635	-1.35438	-0.194866	0.467544	-0.358011	0.452273	0.927716	0.150206	2.86849	-0.560619			0.366	0.772882	-2.71072
		0.8784	0.71723	-0.312208	0.910912	-0.722197	0.400723	2.14423	-0.556743	1.44752	1.14814	1.65723	-1.33468	0.769726	0.75492	0.0485041	1.62156	0.163321	0.753546	-0.28267	0.143113	1.03813	0.000613177	0.787505	-0.573441	0.901414	0.301866	0.325509	-0.72958	-0.721922	1.51933	-0.283409	0.896794	-0.397666	-0.115491	-1.33228	-0.164409	0.480456	-0.374362	0.536335	0.919639	0.199835	2.88314	-0.527259			0.3904	0.738768	-2.73907
		0.9028	0.70609	-0.244142	0.892495	-0.716479	0.393168	2.17115	-0.602173	1.37598	1.08059	1.70297	-1.33245	0.75793	0.727988	0.0722867	1.58693	0.184753	0.773964	-0.318551	0.150746	1.07422	-0.0318807	0.75554	-0.591306	0.92374	0.310629	0.282426	-0.715306	-0.732558	1.52653	-0.328305	0.900783	-0.366955	-0.115123	-1.31073	-0.145171	0.486459	-0.393749	0.645087	0.906723	0.23303	2.89243	-0.460964			0.4148	0.704113	-2.78254
		0.9272	0.687268	-0.189846	0.875185	-0.713383	0.382522	2.18999	-0.653586	1.30666	1.02252	1.74743	-1.32013	0.741569	0.697962	0.071925	1.54785	0.217932	0.807078	-0.349254	0.156022	1.11776	-0.0411112	0.722273	-0.60666	0.934277	0.318911	0.239781	-0.698579	-0.742512	1.52393	-0.395628	0.892093	-0.33739	-0.113166	-1.29018	-0.144376	0.485179	-0.410042	0.768698	0.887381	0.249108	2.89626	-0.377106			0.4392	0.668029	-2.83815
		0.9516	0.661295	-0.142105	0.861926	-0.713408	0.368054	2.19462	-0.698347	1.2417	0.97547	1.78631	-1.2976	0.721094	0.666088	0.0478031	1.50632	0.247098	0.843902	-0.372027	0.15673	1.16982	-0.0360041	0.689237	-0.621896	0.930148	0.326088	0.201438	-0.68121	-0.7503	1.51007	-0.476625	0.871314	-0.311537	-0.107713	-1.27148	-0.161495	0.47583	-0.41976	0.893128	0.860937	0.249326	2.89384	-0.291287			0.4636	0.630137	-2.90066
		0.976	0.62934	-0.0894749	0.853264	-0.716652	0.350365	2.18119	-0.728577	1.18321	0.937798	1.81559	-1.26487	0.697443	0.631574	0.00521598	1.46495	0.264672	0.878149	-0.384936	0.151981	1.2305	-0.0249419	0.657644	-0.641078	0.911431	0.332714	0.170922	-0.666038	-0.75435	1.48485	-0.558656	0.841123	-0.290334	-0.0976017	-1.25597	-0.188897	0.457361	-0.422592	1.00254	0.827299	0.23582	2.88347	-0.21614			0.488	0.590494	-2.95999
		1.0004	0.592839	-0.024215	0.846407	-0.722606	0.331122	2.15034	-0.742813	1.13249	0.905652	1.83187	-1.22334	0.672435	0.591164	-0.0470104	1.42603	0.27067	0.907497	-0.386567	0.142566	1.29824	-0.0172969	0.628394	-0.668497	0.880759	0.339835	0.151194	-0.655718	-0.757177	1.44952	-0.628247	0.804896	-0.273089	-0.0823909	-1.24428	-0.216914	0.42931	-0.42047	1.08272	0.787312	0.210641	2.86432	-0.161502			0.5124	0.549383	-3.00411
		1.0248	0.553092	0.0531529	0.837906	-0.730217	0.311837	2.10831	-0.743656	1.08935	0.876581	1.83211	-1.17618	0.647819	0.542379	-0.0924973	1.39052	0.269158	0.930201	-0.376235	0.130345	1.37008	-0.0232204	0.601782	-0.706279	0.841581	0.348398	0.143692	-0.651591	-0.766843	1.40639	-0.676296	0.765546	-0.257975	-0.0626191	-1.23592	-0.238723	0.392802	-0.415917	1.12537	0.743098	0.175733	2.83765	-0.133585			0.5368	0.507219	-3.02704
		1.0492	0.511202	0.136267	0.826024	-0.737881	0.293166	2.06481	-0.734243	1.05223	0.851807	1.815	-1.12762	0.624168	0.486381	-0.110412	1.35792	0.264992	0.945981	-0.354505	0.117728	1.44214	-0.0459082	0.577165	-0.753333	0.796551	0.359071	0.147503	-0.653154	-0.793437	1.35827	-0.701278	0.724954	-0.242834	-0.0403655	-1.23034	-0.253919	0.351054	-0.412487	1.13185	0.697348	0.13325	2.80565	-0.132305			0.5612	0.464581	-3.03316
		1.0736	0.468187	0.221385	0.809839	-0.743453	0.275514	2.02881	-0.716013	1.01902	0.834319	1.78325	-1.08194	0.600366	0.427689	-0.0873637	1.32666	0.25998	0.957924	-0.323786	0.107129	1.51068	-0.07728	0.55314	-0.805552	0.747605	0.372081	0.159611	-0.658446	-0.841439	1.3078	-0.70722	0.684366	-0.2262	-0.0191332	-1.22727	-0.26742	0.308917	-0.41431	1.1112	0.652335	0.0848969	2.76982	-0.149118			0.5856	0.422029	-3.03531
		1.098	0.425035	0.30845	0.787668	-0.744765	0.259692	2.00614	-0.691144	0.987888	0.827942	1.74333	-1.04317	0.573693	0.372077	-0.0233544	1.29505	0.25053	0.969619	-0.288266	0.100494	1.5738	-0.105086	0.528189	-0.856942	0.697175	0.386934	0.17601	-0.665121	-0.905159	1.25725	-0.698375	0.645259	-0.208081	-0.00244836	-1.22609	-0.284497	0.271549	-0.423302	1.07313	0.609566	0.0313998	2.73092	-0.170523			0.61	0.3797	-3.04895
		1.1224	0.382736	0.393646	0.757826	-0.740389	0.246752	1.99895	-0.66766	0.957642	0.837291	1.70238	-1.015	0.540642	0.324748	0.0701947	1.26206	0.232726	0.982868	-0.252811	0.0994174	1.63158	-0.122413	0.501253	-0.901379	0.648687	0.402492	0.192702	-0.670942	-0.970365	1.20867	-0.675981	0.60959	-0.189797	0.00759408	-1.22573	-0.307697	0.243098	-0.437982	1.02472	0.569649	-0.0265401	2.68985	-0.186369			0.6344	0.337144	-3.08364
		1.1468	0.342336	0.468456	0.720062	-0.729797	0.238019	2.00535	-0.655686	0.927912	0.866863	1.66588	-0.999985	0.498354	0.289282	0.175137	1.22768	0.210129	0.99885	-0.221619	0.105067	1.68467	-0.13018	0.472073	-0.933802	0.605874	0.417411	0.206076	-0.674002	-1.02041	1.16383	-0.639401	0.579414	-0.173061	0.0105177	-1.22542	-0.337004	0.226047	-0.454712	0.971673	0.532318	-0.0873331	2.64739	-0.194			0.6588	0.293603	-3.13739
		1.1712	0.305017	0.528125	0.675321	-0.713042	0.235439	2.02038	-0.656398	0.89905	0.918168	1.63705	-0.998728	0.445991	0.267158	0.27288	1.19257	0.194843	1.01914	-0.197436	0.117365	1.73454	-0.133632	0.441371	-0.950986	0.571963	0.43031	0.213265	-0.673383	-1.04357	1.12381	-0.588553	0.556714	-0.159072	0.00697491	-1.22493	-0.368075	0.221243	-0.470087	0.918421	0.49687	-0.148726	2.60379	-0.196435			0.6832	0.248563	-3.2
		1.1956	0.27218	0.576954	0.62563	-0.690724	0.241255	2.03895	-0.660403	0.871743	0.984795	1.61735	-1.00957	0.385126	0.257891	0.348535	1.15753	0.20185	1.04626	-0.181616	0.134699	1.78337	-0.138042	0.410772	-0.9527	0.549144	0.439505	0.212487	-0.669365	-1.03647	1.08862	-0.52428	0.543316	-0.148226	-0.00151392	-1.2241	-0.391192	0.228624	-0.483875	0.867968	0.462504	-0.208343	2.55954	-0.198019			0.7076	0.202308	-3.26163
		1.22	0.245368	0.623096	0.575078	-0.664238	0.256908	2.05755	-0.656937	0.84643	1.05343	1.60721	-1.02899	0.318651	0.259309	0.393832	1.12308	0.241093	1.08161	-0.174868	0.154824	1.83138	-0.148148	0.382344	-0.941752	0.53811	0.44282	0.20276	-0.662655	-1.00285	1.05724	-0.447381	0.53998	-0.140372	-0.0127905	-1.22274	-0.396928	0.248279	-0.498696	0.82157	0.428206	-0.26434	2.5156	-0.201569			0.732	0.15607	-3.31689
		1.2444	0.225795	0.671418	0.528256	-0.635547	0.282016	2.07432	-0.642284	0.823017	1.11121	1.60554	-1.05273	0.248972	0.267972	0.409558	1.08935	0.313371	1.12114	-0.177993	0.17591	1.87576	-0.169234	0.357991	-0.92259	0.538285	0.437835	0.183746	-0.653991	-0.950342	1.02803	-0.358226	0.54523	-0.135231	-0.0246194	-1.22094	-0.381702	0.28075	-0.516255	0.778082	0.392626	-0.315867	2.47249	-0.209994			0.7564	0.111641	-3.36258
		1.2688	0.213847	0.720939	0.486763	-0.606492	0.313971	2.08918	-0.622315	0.801186	1.15095	1.6095	-1.07725	0.177425	0.28005	0.403679	1.05598	0.41137	1.15771	-0.191935	0.197053	1.91308	-0.204946	0.339179	-0.900482	0.548586	0.422667	0.156192	-0.644732	-0.886966	0.999286	-0.256802	0.555277	-0.132608	-0.0352595	-1.21908	-0.348344	0.326277	-0.536268	0.73459	0.354413	-0.36256	2.43077	-0.225893			0.7808	0.0706279	-3.39665
		1.2932	0.209017	0.763648	0.449541	-0.578354	0.348486	2.10352	-0.608163	0.780953	1.17302	1.61589	-1.10053	0.10541	0.291845	0.386271	1.02247	0.522411	1.18927	-0.217025	0.218351	1.94257	-0.25394	0.327057	-0.881073	0.567268	0.396889	0.12215	-0.636711	-0.820581	0.969615	-0.143338	0.565021	-0.132416	-0.0435399	-1.21731	-0.303796	0.384179	-0.558641	0.687478	0.31282	-0.403446	2.39211	-0.243954			0.8052	0.0336985	-3.41935
		1.3176	0.210116	0.787116	0.416566	-0.551777	0.380924	2.11891	-0.608002	0.763024	1.18368	1.62155	-1.12185	0.035101	0.300356	0.364122	0.98841	0.633935	1.22011	-0.252247	0.240591	1.96734	-0.309104	0.322742	-0.869085	0.591411	0.361788	0.0849078	-0.630831	-0.760637	0.938047	-0.0205214	0.569652	-0.134816	-0.048609	-1.21517	-0.255288	0.453122	-0.583321	0.633401	0.268185	-0.436361	2.35885	-0.248186			0.8296	0.000228328	-3.43195
		1.342	0.215541	0.781171	0.389883	-0.526893	0.407395	2.13624	-0.623727	0.748891	1.1899	1.62289	-1.14089	-0.0310284	0.304681	0.339259	0.953458	0.738067	1.25433	-0.295468	0.26454	1.99193	-0.361597	0.327419	-0.866755	0.617489	0.319938	0.048746	-0.626592	-0.71463	0.904076	0.10461	0.565999	-0.140345	-0.0497469	-1.21155	-0.209185	0.531539	-0.607148	0.570052	0.222237	-0.458313	2.33319	-0.223409			0.854	-0.0315873	-3.43453
		1.3664	0.223576	0.744452	0.370864	-0.503781	0.425648	2.15626	-0.654272	0.740562	1.19462	1.61718	-1.15685	-0.090074	0.306042	0.313427	0.917093	0.830417	1.29124	-0.344061	0.289934	2.01774	-0.406333	0.342048	-0.873025	0.64277	0.274715	0.0180802	-0.623163	-0.681854	0.867647	0.222402	0.552857	-0.149556	-0.0465651	-1.20578	-0.170964	0.617632	-0.622439	0.495127	0.177932	-0.466572	2.31672	-0.166184			0.8784	-0.0642344	-3.426
		1.3908	0.232691	0.688721	0.358418	-0.482847	0.435905	2.1808	-0.69809	0.739862	1.19537	1.60407	-1.1684	-0.138389	0.305638	0.289912	0.878506	0.908411	1.32557	-0.395318	0.31499	2.04149	-0.441772	0.36677	-0.884527	0.666609	0.229725	-0.00382075	-0.62052	-0.655094	0.82908	0.324559	0.530762	-0.162511	-0.0398276	-1.19876	-0.142482	0.709131	-0.620124	0.405414	0.138389	-0.460058	2.30994	-0.0833117			0.9028	-0.100044	-3.40671
		1.4152	0.241738	0.636282	0.35025	-0.46439	0.44059	2.21319	-0.751706	0.747818	1.18655	1.58532	-1.17426	-0.17251	0.303952	0.271446	0.836864	0.971866	1.35081	-0.446805	0.337476	2.05834	-0.467996	0.400421	-0.898027	0.690315	0.18806	-0.0159882	-0.619955	-0.62752	0.78911	0.405402	0.501493	-0.178702	-0.0318235	-1.19252	-0.121203	0.803159	-0.595863	0.298366	0.105712	-0.440121	2.31185	0.0130035			0.9272	-0.140341	-3.38199
		1.4396	0.249958	0.607722	0.344318	-0.447865	0.443115	2.25602	-0.807731	0.764533	1.16351	1.56375	-1.17374	-0.190369	0.302386	0.259479	0.791806	1.02176	1.36496	-0.496361	0.356064	2.06554	-0.487486	0.44056	-0.911433	0.715448	0.151932	-0.0204063	-0.62352	-0.596762	0.749088	0.459727	0.467127	-0.197159	-0.0252866	-1.18858	-0.103007	0.896449	-0.55293	0.174574	0.0807096	-0.410088	2.32047	0.108863			0.9516	-0.185144	-3.36171
		1.464	0.256849	0.606646	0.338874	-0.431919	0.446958	2.30777	-0.855442	0.789387	1.1237	1.54237	-1.16683	-0.191982	0.303507	0.252983	0.743869	1.05825	1.37199	-0.541925	0.370239	2.06294	-0.505387	0.484249	-0.922294	0.742667	0.122717	-0.0212935	-0.632395	-0.566513	0.710981	0.482057	0.429302	-0.216643	-0.0220484	-1.18716	-0.0856892	0.985948	-0.4984	0.0391415	0.0633491	-0.374418	2.33344	0.193209			0.976	-0.233542	-3.35289
		1.4884	0.262128	0.617656	0.332474	-0.415024	0.455077	2.36217	-0.885408	0.821379	1.06509	1.52298	-1.15344	-0.179292	0.308841	0.249905	0.694545	1.08196	1.3759	-0.581859	0.379524	2.05152	-0.529581	0.52911	-0.927578	0.772318	0.100943	-0.0228962	-0.64593	-0.544808	0.676979	0.469651	0.389141	-0.235912	-0.0227337	-1.1869	-0.0711052	1.06943	-0.438857	-0.0989054	0.0534326	-0.337951	2.3474	0.259173			1.0004	-0.284344	-3.35371
																																															1.0248	-0.336663	-3.35683
																																															1.0492	-0.390109	-3.35625
																																															1.0736	-0.44434	-3.35064
																																															1.098	-0.498323	-3.34299
																																															1.1224	-0.549846	-3.33759
																																															1.1468	-0.595484	-3.33649
																																															1.1712	-0.631073	-3.33765
																																															1.1956	-0.652498	-3.33552
																																															1.22	-0.656404	-3.32294
																																															1.2444	-0.640692	-3.2929
																																															1.2688	-0.604774	-3.24197
																																															1.2932	-0.549594	-3.17262
																																															1.3176	-0.4774	-3.09005
																																															1.342	-0.391314	-2.99817
																																															1.3664	-0.295045	-2.90007
																																															1.3908	-0.192945	-2.79997
																																															1.4152	-0.0900038	-2.70378
																																															1.4396	0.00866659	-2.61754
																																															1.464	0.0986972	-2.54459
																																															1.4884	0.177308	-2.48414
																																															1.5128	0.243893	-2.43236
																																															1.5372	0.300126	-2.38636
																																															1.5616	0.349302	-2.34489
																																															1.586	0.395074	-2.30314
																																															1.6104	0.440255	-2.25395
																																															1.6348	0.486142	-2.19695
																																															1.6592	0.532539	-2.14288
																																															1.6836	0.578367	-2.10847
																																															1.708	0.622304	-2.10394
																																															1.7324	0.662942	-2.12428
																																															1.7568	0.698714	-2.15778
																																															1.7812	0.728109	-2.19912
																																															1.8056	0.750054	-2.24834
																																															1.83	0.764265	-2.30196
																																															1.8544	0.771539	-2.35118
																																															1.8788	0.77376	-2.38834
																																															1.9032	0.773474	-2.41104
																																															1.9276	0.773409	-2.42115
																																															1.952	0.77614	-2.42386
																																															1.9764	0.783705	-2.426
																																															2.0008	0.79732	-2.42923
																																															2.0252	0.817488	-2.42443
																																															2.0496	0.844415	-2.39809
																																															2.074	0.878295	-2.34302
																																															2.0984	0.919292	-2.25868
																																															2.1228	0.967346	-2.14646
																																															2.1472	1.02197	-2.00987
																																															2.1716	1.08201	-1.85568
																																															2.196	1.1455	-1.69184
																																															2.2204	1.21006	-1.52485
																																															2.2448	1.27342	-1.35982
																																															2.2692	1.33396	-1.20399
																																															2.2936	1.39106	-1.0692
																																															2.318	1.44556	-0.968768
																																															2.3424	1.5	-0.910528
																																															2.3668	1.55841	-0.891456
																																															2.3912	1.62527	-0.89738
																																															2.4156	1.7042	-0.908883
																																															2.44	1.79721	-0.909481
																																															2.4644	1.90461	-0.891476
																																															2.4888	2.02524	-0.857347
																																															2.5132	2.15679	-0.816713
																																															2.5376	2.29603	-0.779919
																																															2.562	2.43883	-0.752337
																																															2.5864	2.58037	-0.736685
																																															2.6108	2.71537	-0.737887
																																															2.6352	2.83875	-0.757618
																																															2.6596	2.94619	-0.787865
																																															2.684	3.03446	-0.818887
																																															2.7084	3.10129	-0.849219
																																															2.7328	3.14575	-0.882042
																																															2.7572	3.1692	-0.91657
																																															2.7816	3.17587	-0.943894
																																															2.806	3.17236	-0.947786
																																															2.8304	3.16585	-0.913975
																																															2.8548	3.16186	-0.841238
																																															2.8792	3.16301	-0.741079
																																															2.9036	3.16897	-0.630499
																																															2.928	3.17696	-0.528419
																																															2.9524	3.18277	-0.452836
																																															2.9768	3.18194	-0.415129
																																															3.0012	3.17075	-0.417095
																																															3.0256	3.14711	-0.453239
																																															3.05	3.11161	-0.514492
																																															3.0744	3.06775	-0.589973
																																															3.0988	3.0203	-0.666801
																																															3.1232	2.97272	-0.730372
																																															3.1476	2.92567	-0.766314
																																															3.172	2.87697	-0.763386
																																															3.1964	2.82298	-0.717038
																																															3.2208	2.76097	-0.633844
																																															3.2452	2.69121	-0.531387
																																															3.2696	2.61734	-0.430545
																																															3.294	2.54482	-0.348551
																																															3.3184	2.47832	-0.297582
																																															3.3428	2.41971	-0.285969
																																															3.3672	2.36779	-0.319298
																																															3.3916	2.31953	-0.397906
																																															3.416	2.27187	-0.513155
																																															3.4404	2.22312	-0.649648
																																															3.4648	2.17325	-0.790554
																																															3.4892	2.12322	-0.920259
																																															3.5136	2.07377	-1.02633
																																															3.538	2.02466	-1.09973
																																															3.5624	1.97437	-1.13484
																																															3.5868	1.92043	-1.13578
																																															3.6112	1.86017	-1.11844
																																															3.6356	1.79167	-1.09947
																																															3.66	1.71426	-1.08809
																																															3.6844	1.62833	-1.08807
																																															3.7088	1.53474	-1.0986
																																															3.7332	1.4344	-1.11038
																																															3.7576	1.32818	-1.1068
																																															3.782	1.21718	-1.07383
																																															3.8064	1.10316	-1.0095
																																															3.8308	0.988643	-0.925183
																																															3.8552	0.876194	-0.838161
																																															3.8796	0.767362	-0.761339
																																															3.904	0.662581	-0.698133
																																															3.9284	0.562064	-0.644387
																																															3.9528	0.466618	-0.594698
																																															3.9772	0.377767	-0.547678
																																															4.0016	0.297371	-0.505401
																																															4.026	0.226949	-0.469715
																																															4.0504	0.166748	-0.440782
																																															4.0748	0.115082	-0.417821
																																															4.0992	0.0686902	-0.400345
																																															4.1236	0.0241211	-0.389621
																																															4.148	-0.0208617	-0.385962
																																															4.1724	-0.0666776	-0.383125
																																															4.1968	-0.112249	-0.372176
																																															4.2212	-0.155928	-0.352179
																																															4.2456	-0.196604	-0.330374
																																															4.27	-0.234327	-0.312813
																																															4.2944	-0.269957	-0.300104
																																															4.3188	-0.304324	-0.290761
																																															4.3432	-0.337753	-0.285431
																																															4.3676	-0.370027	-0.286748
																																															4.392	-0.40055	-0.294859
																																															4.4164	-0.428674	-0.306077
																																															4.4408	-0.454023	-0.316702
																																															4.4652	-0.476743	-0.324944
																																															4.4896	-0.497781	-0.330101
																																															4.514	-0.518747	-0.33203
																																															4.5384	-0.540992	-0.331167
																																															4.5628	-0.564736	-0.328557
																																															4.5872	-0.589051	-0.325083
																																															4.6116	-0.612256	-0.320636
																																															4.636	-0.632265	-0.312657
																																															4.6604	-0.647112	-0.294987
																																															4.6848	-0.655493	-0.260019
																																															4.7092	-0.656876	-0.202569
																																															4.7336	-0.651409	-0.124462
																																															4.758	-0.639864	-0.0367423
																																															4.7824	-0.623453	0.0451841
																																															4.8068	-0.603587	0.10743
																																															4.8312	-0.581872	0.139601
																																															4.8556	-0.560166	0.137019
																																															4.88	-0.540473	0.102099
																																															4.9044	-0.524681	0.0413651
																																															4.9288	-0.51425	-0.03737
																																															4.9532	-0.51007	-0.124902
																																															4.9776	-0.512557	-0.211569
																																															5.002	-0.521779	-0.289029
																																															5.0264	-0.537547	-0.351949
																																															5.0508	-0.559257	-0.399552
[truncated: 40 more columns]

## Sheet: Figure6D-F
											CUE (VTA)																										Action+Reward (VTA)
Block (1=0%, 2= 6%, 3 = 10%)	1	1	1	1	2	2	2	2	3	3	3	3	1	1	1	1	2	2	2	2	3	3	3	3		Block (1=0%, 2= 6%, 3 = 10%)	1	1	1	1	2	2	2	2	3	3	3	3	1	1	1	1	2	2	2	2	3	3	3
Session	Diazepam	Diazepam	Diazepam	Diazepam	Diazepam	Diazepam	Diazepam	Diazepam	Diazepam	Diazepam	Diazepam	Diazepam	Saline	Saline	Saline	Saline	Saline	Saline	Saline	Saline	Saline	Saline	Saline	Saline		Session	Diazepam	Diazepam	Diazepam	Diazepam	Diazepam	Diazepam	Diazepam	Diazepam	Diazepam	Diazepam	Diazepam	Diazepam	Saline	Saline	Saline	Saline	Saline	Saline	Saline	Saline	Saline	Saline	Saline
Subject	S251	S252	S256	S320	S251	S252	S256	S320	S251	S252	S256	S320	S251	S252	S256	S320	S251	S252	S256	S320	S251	S252	S256	S320		Subject	S251	S252	S256	S320	S251	S252	S256	S320	S251	S252	S256	S320	S251	S252	S256	S320	S251	S252	S256	S320	S251	S252	S256
	z-score df/f	z-score df/f	z-score df/f	z-score df/f	z-score df/f	z-score df/f	z-score df/f	z-score df/f	z-score df/f	z-score df/f	z-score df/f	z-score df/f	z-score df/f	z-score df/f	z-score df/f	z-score df/f	z-score df/f	z-score df/f	z-score df/f	z-score df/f	z-score df/f	z-score df/f	z-score df/f	z-score df/f			z-score df/f	z-score df/f	z-score df/f	z-score df/f	z-score df/f	z-score df/f	z-score df/f	z-score df/f	z-score df/f	z-score df/f	z-score df/f	z-score df/f	z-score df/f	z-score df/f	z-score df/f	z-score df/f	z-score df/f	z-score df/f	z-score df/f	z-score df/f	z-score df/f	z-score df/f	z-score df/f
																										peri-action time - sec
Peri-cue time - sec																										-2.0008	0.501416	0.594312	0.156725	0.122893	0.358889	-0.164537	0.0206201	-0.387853	0.209016	0.215366	0.588936	0.328655	-0.138009	0.0336352	-0.43825	0.0516499	-0.155307	-0.504225	-0.356035	-0.0099927	-0.472502	0.259697	0.902928
-1.5128	0.127047	-0.421661	0.867212	0.176319	0.355736	0.555726	0.712095	0.344316	0.0636966	0.353285	-2.33673	-0.492799	-0.620384	0.271115	0.244806	-0.110489	-0.0142896	-0.212821	0.648928	0.0149688	-0.326915	-0.382606	0.81288	0.156879		-1.9764	0.514342	0.649525	0.159678	0.14282	0.439631	-0.147953	0.00957836	-0.327928	0.266654	0.193196	0.616125	0.324111	-0.11597	0.0494286	-0.510797	0.0915881	-0.150892	-0.508636	-0.356031	-0.0448474	-0.527833	0.245923	0.837449
-1.4884	0.148981	-0.446288	0.890177	0.174627	0.340476	0.569018	0.712968	0.352713	0.085068	0.423737	-2.41846	-0.458889	-0.600916	0.327028	0.249088	-0.0893378	-0.0112724	-0.21337	0.681669	-0.0398618	-0.327196	-0.354565	1.21187	0.109625		-1.952	0.520559	0.701895	0.159752	0.181741	0.516832	-0.133832	0.00212347	-0.259931	0.326408	0.168386	0.633152	0.298038	-0.0925387	0.0672953	-0.582122	0.134603	-0.152994	-0.504498	-0.345175	-0.0781408	-0.580318	0.226008	0.809911
-1.464	0.183469	-0.467749	0.908115	0.166227	0.329407	0.583117	0.698315	0.353038	0.105805	0.490399	-2.45765	-0.424788	-0.582997	0.38481	0.258682	-0.0738847	-0.00811304	-0.219204	0.71042	-0.0825432	-0.324157	-0.329018	1.50554	0.0730194		-1.9276	0.519945	0.749973	0.156153	0.220013	0.586518	-0.120479	0.00457711	-0.189035	0.385431	0.141242	0.641926	0.260211	-0.0675723	0.0860411	-0.648274	0.175284	-0.160307	-0.493703	-0.333004	-0.105394	-0.627561	0.200141	0.811163
-1.4396	0.228181	-0.486651	0.923259	0.155658	0.320797	0.597759	0.668812	0.356744	0.122935	0.550466	-2.46757	-0.395487	-0.569303	0.442376	0.278319	-0.0742083	-0.00461551	-0.23195	0.735995	-0.11206	-0.320012	-0.30708	1.65996	0.0477846		-1.9032	0.515684	0.793294	0.146816	0.241197	0.650017	-0.105647	0.0206485	-0.122421	0.442213	0.111825	0.638127	0.21874	-0.041637	0.102938	-0.704913	0.212106	-0.171695	-0.479099	-0.328868	-0.118031	-0.667935	0.168591	0.828821
-1.4152	0.277715	-0.504083	0.936297	0.143586	0.313478	0.611283	0.626519	0.37045	0.134506	0.603622	-2.46421	-0.378415	-0.557648	0.499608	0.308348	-0.0893807	-0.00368315	-0.251002	0.76037	-0.131439	-0.316047	-0.288234	1.67011	0.032562		-1.8788	0.512209	0.832773	0.13043	0.243134	0.712172	-0.0881268	0.0508712	-0.0645901	0.496883	0.0800425	0.6146	0.177367	-0.0151501	0.115001	-0.747828	0.249655	-0.186475	-0.463265	-0.335662	-0.106918	-0.699914	0.132418	0.853387
-1.3908	0.32629	-0.520827	0.947476	0.128867	0.306192	0.622174	0.573059	0.394119	0.139766	0.650467	-2.4608	-0.37789	-0.543294	0.556819	0.342724	-0.106022	-0.00800382	-0.274043	0.786414	-0.144861	-0.311784	-0.271043	1.55539	0.0211293		-1.8544	0.512075	0.870606	0.108298	0.234486	0.777328	-0.0687092	0.0930541	-0.01535	0.550305	0.0458461	0.569093	0.137108	0.0120624	0.120967	-0.77535	0.29117	-0.202812	-0.447813	-0.350216	-0.0713338	-0.722994	0.0930225	0.876051
-1.3664	0.369458	-0.537219	0.95791	0.114754	0.297075	0.630459	0.509633	0.424213	0.139087	0.690665	-2.4615	-0.391817	-0.522853	0.613147	0.371863	-0.107583	-0.0181966	-0.297996	0.815207	-0.155018	-0.306643	-0.253951	1.34975	0.0090199		-1.83	0.51498	0.9092	0.0842544	0.223336	0.84633	-0.0496055	0.143336	0.0287863	0.603132	0.00956452	0.506329	0.0974181	0.0405563	0.122438	-0.790204	0.332691	-0.217928	-0.433296	-0.36766	-0.0223925	-0.738895	0.0511599	0.891791
-1.342	0.404463	-0.553477	0.969263	0.109685	0.28406	0.637957	0.439906	0.455933	0.133773	0.722608	-2.46345	-0.414132	-0.495933	0.666212	0.388484	-0.0858182	-0.0334937	-0.319683	0.845801	-0.163069	-0.301603	-0.235627	1.08717	0.00178318		-1.8056	0.518924	0.950069	0.0626646	0.213542	0.916331	-0.0328521	0.19702	0.0725508	0.655294	-0.0280927	0.433633	0.0557589	0.0703936	0.12308	-0.798341	0.366636	-0.230369	-0.41952	-0.382772	0.0238244	-0.751022	0.00675236	0.902458
-1.3176	0.430122	-0.569876	0.982944	0.118104	0.266177	0.647185	0.371159	0.484838	0.125535	0.744275	-2.46821	-0.439258	-0.464067	0.712603	0.391379	-0.0461308	-0.0528306	-0.336514	0.876749	-0.17047	-0.298812	-0.214964	0.797614	0.0101349		-1.7812	0.521743	0.993711	0.0458863	0.207657	0.982892	-0.0189541	0.24937	0.118883	0.705703	-0.0662979	0.358229	0.00879966	0.100552	0.126299	-0.805228	0.388485	-0.240749	-0.405745	-0.389101	0.0578285	-0.762749	-0.0399622	0.912506
-1.2932	0.447336	-0.586435	0.999084	0.133392	0.243761	0.659799	0.311483	0.508995	0.11597	0.754222	-2.48599	-0.462254	-0.428984	0.748861	0.38441	-0.00256509	-0.0750889	-0.34729	0.907761	-0.180756	-0.298962	-0.190543	0.514433	0.0390461		-1.7568	0.522638	1.04005	0.0332034	0.207253	1.04234	-0.00652922	0.297111	0.166854	0.75194	-0.104089	0.287362	-0.0434255	0.130438	0.13314	-0.81235	0.39899	-0.250008	-0.39025	-0.381486	0.0810226	-0.776352	-0.0871295	0.923734
-1.2688	0.459381	-0.60232	1.01581	0.144694	0.217076	0.675758	0.266958	0.528778	0.106962	0.752545	-2.52623	-0.477048	-0.392175	0.772704	0.37297	0.0328005	-0.0991443	-0.352256	0.940006	-0.199899	-0.299907	-0.160244	0.274437	0.0859559		-1.7324	0.523037	1.0887	0.0220779	0.211024	1.0935	0.00681633	0.339264	0.214117	0.790464	-0.140268	0.225163	-0.0958903	0.161076	0.142247	-0.816367	0.402388	-0.258272	-0.370536	-0.35963	0.0982669	-0.792786	-0.131314	0.936702
-1.2444	0.470085	-0.615478	1.03117	0.147654	0.185804	0.693997	0.240301	0.542646	0.10109	0.74136	-2.58698	-0.479855	-0.356003	0.783948	0.361061	0.0542996	-0.124287	-0.352269	0.97329	-0.233042	-0.298696	-0.122056	0.107033	0.145447		-1.708	0.525465	1.1391	0.0103379	0.21529	1.13814	0.0231514	0.375928	0.259591	0.818197	-0.173758	0.167687	-0.14274	0.193396	0.151736	-0.810852	0.403921	-0.265439	-0.344862	-0.326578	0.111622	-0.811645	-0.168793	0.954843
-1.22	0.481408	-0.622887	1.04504	0.1451	0.149963	0.714003	0.229132	0.545243	0.100354	0.724145	-2.65241	-0.473962	-0.32471	0.784538	0.350495	0.0600177	-0.149387	-0.348376	1.0042	-0.279684	-0.293691	-0.0758459	0.0240635	0.209975		-1.6836	0.531332	1.19105	-0.00242163	0.217806	1.17928	0.0438757	0.405989	0.301988	0.834508	-0.203871	0.105283	-0.180829	0.226505	0.160925	-0.789824	0.408531	-0.271961	-0.313041	-0.284441	0.122209	-0.832754	-0.196978	0.982095
-1.1956	0.493125	-0.621525	1.0576	0.142784	0.110714	0.736587	0.22616	0.532042	0.104284	0.704292	-2.70114	-0.467426	-0.303353	0.777584	0.34199	0.049875	-0.171945	-0.342229	1.02915	-0.333019	-0.284582	-0.0247822	0.0167564	0.27041		-1.6592	0.539917	1.24524	-0.0148796	0.220662	1.21928	0.0705144	0.426544	0.338905	0.841337	-0.229801	0.030696	-0.20744	0.258295	0.1708	-0.751222	0.419932	-0.279371	-0.275587	-0.2335	0.132639	-0.858383	-0.215267	1.01664
-1.1712	0.503701	-0.609617	1.06836	0.145523	0.0701542	0.763067	0.22378	0.502989	0.109909	0.683909	-2.72116	-0.467444	-0.295769	0.766188	0.336852	0.0269748	-0.189906	-0.336187	1.04758	-0.384533	-0.272404	0.0248187	0.059253	0.323085		-1.6348	0.548922	1.30294	-0.025234	0.227452	1.25946	0.105514	0.435079	0.368623	0.841501	-0.250172	-0.0573326	-0.21838	0.28689	0.183285	-0.696936	0.437834	-0.289722	-0.23303	-0.175004	0.147559	-0.891901	-0.225034	1.05003
-1.1468	0.511216	-0.587406	1.07774	0.151244	0.0301653	0.793828	0.218963	0.460269	0.113684	0.663858	-2.71657	-0.478007	-0.304312	0.752777	0.337324	-0.00154927	-0.203088	-0.332724	1.05995	-0.428664	-0.258683	0.0654129	0.115648	0.374818		-1.6104	0.555669	1.36539	-0.0324644	0.238489	1.30031	0.152082	0.431106	0.391169	0.837625	-0.263449	-0.155731	-0.210562	0.311504	0.199857	-0.629546	0.457171	-0.305027	-0.186231	-0.113775	0.173236	-0.934032	-0.228661	1.07163
-1.1224	0.515123	-0.556945	1.08725	0.149972	-0.00858363	0.827862	0.213321	0.405374	0.113441	0.644744	-2.69624	-0.499225	-0.330117	0.739189	0.344509	-0.0279607	-0.211848	-0.333747	1.06341	-0.462959	-0.242533	0.0907526	0.153117	0.435785		-1.586	0.558469	1.43332	-0.0371639	0.251595	1.34165	0.212849	0.415247	0.40829	0.832079	-0.268326	-0.259371	-0.182236	0.332863	0.220636	-0.550764	0.473342	-0.328256	-0.136905	-0.0576231	0.212654	-0.981348	-0.228408	1.07399
-1.098	0.517764	-0.520958	1.09809	0.133158	-0.0464014	0.863584	0.209815	0.338294	0.109177	0.627721	-2.65687	-0.526845	-0.371796	0.727446	0.356854	-0.0478285	-0.215937	-0.340123	1.05253	-0.487769	-0.21988	0.0978104	0.156494	0.506435		-1.5616	0.557881	1.50704	-0.0417302	0.265102	1.38319	0.288203	0.388906	0.423542	0.826713	-0.263864	-0.363335	-0.132002	0.352952	0.244805	-0.463109	0.486202	-0.362435	-0.0879692	-0.0149638	0.259651	-1.02817	-0.226104	1.05736
-1.0736	0.523724	-0.481704	1.11051	0.102564	-0.0835461	0.899766	0.209809	0.257637	0.102926	0.61471	-2.58293	-0.554171	-0.424869	0.72009	0.371348	-0.0606412	-0.213584	-0.351619	1.02582	-0.506802	-0.186209	0.0874017	0.129767	0.574507		-1.5372	0.557067	1.58602	-0.0486167	0.277016	1.42508	0.375665	0.355817	0.440506	0.822667	-0.250134	-0.462897	-0.0635976	0.373426	0.271791	-0.370459	0.496698	-0.407341	-0.0434713	0.00630013	0.302134	-1.06988	-0.223195	1.02916
-1.0492	0.53789	-0.440993	1.12429	0.068879	-0.119301	0.935918	0.211543	0.163357	0.0982089	0.60786	-2.46876	-0.576121	-0.483219	0.719294	0.384842	-0.0694521	-0.200482	-0.367114	0.98993	-0.523532	-0.139109	0.06319	0.0877406	0.626325		-1.5128	0.560514	1.6684	-0.0583702	0.284237	1.46831	0.47106	0.322617	0.458817	0.820728	-0.228499	-0.55232	0.0104511	0.394067	0.301791	-0.276763	0.501804	-0.459122	-0.00784485	-0.000325129	0.332448	-1.10506	-0.220537	0.995625
-1.0248	0.563497	-0.400721	1.13967	0.0440092	-0.151646	0.9721	0.210977	0.0610412	0.0988411	0.608027	-2.33643	-0.591239	-0.540353	0.725617	0.394558	-0.0782987	-0.171632	-0.38486	0.955438	-0.536474	-0.0801004	0.0299578	0.0487537	0.656794		-1.4884	0.571855	1.75103	-0.0701965	0.28484	1.51409	0.5707	0.29655	0.473913	0.821448	-0.200433	-0.626809	0.0736585	0.41315	0.335263	-0.185594	0.494866	-0.513116	0.0151643	-0.0376206	0.352422	-1.13557	-0.218371	0.953771
-1.0004	0.600535	-0.362651	1.1571	0.035306	-0.178215	1.00804	0.204883	-0.0380877	0.107703	0.61358	-2.22625	-0.600511	-0.590391	0.737702	0.398871	-0.0872615	-0.125056	-0.402942	0.930512	-0.538879	-0.0161168	-0.0076906	0.0251649	0.66778		-1.464	0.592047	1.83044	-0.0829061	0.280111	1.56243	0.672792	0.281153	0.482472	0.824649	-0.166213	-0.68457	0.112884	0.428637	0.372599	-0.0997692	0.470614	-0.565714	0.0234469	-0.102723	0.367867	-1.16499	-0.216702	0.894122
-0.976	0.645237	-0.327613	1.1755	0.0426184	-0.198013	1.04226	0.193313	-0.12119	0.126801	0.621089	-2.1716	-0.606001	-0.629494	0.753162	0.397558	-0.0920379	-0.0641818	-0.41971	0.918439	-0.524168	0.0434521	-0.0460715	0.0155152	0.661727		-1.4396	0.618544	1.90395	-0.0947586	0.274973	1.61135	0.777007	0.273806	0.486938	0.828982	-0.125086	-0.727975	0.122211	0.438601	0.414443	-0.0205559	0.42869	-0.614238	0.0172269	-0.187215	0.380583	-1.1959	-0.2157	0.810513
-0.9516	0.690727	-0.294999	1.19192	0.0572341	-0.211685	1.07243	0.179564	-0.177944	0.157476	0.627276	-2.18192	-0.60931	-0.656333	0.769848	0.391083	-0.0888285	0.00214747	-0.433918	0.917192	-0.491238	0.0935376	-0.0826584	0.012348	0.637908		-1.4152	0.646329	1.97027	-0.104009	0.277035	1.65722	0.88309	0.268213	0.494283	0.832298	-0.0764052	-0.764443	0.10512	0.442166	0.462031	0.0512361	0.373642	-0.656005	-0.000448157	-0.279976	0.389127	-1.22822	-0.215942	0.703028
-0.9272	0.729007	-0.26312	1.20343	0.0663539	-0.220012	1.0967	0.168256	-0.203171	0.19955	0.630312	-2.24379	-0.611253	-0.671226	0.786684	0.379903	-0.0772621	0.0636641	-0.445023	0.920919	-0.442714	0.13642	-0.115709	0.0180892	0.595833		-1.3908	0.671311	2.02934	-0.109167	0.293492	1.69636	0.990166	0.259273	0.510423	0.83243	-0.0204999	-0.803942	0.0731334	0.440986	0.517178	0.113119	0.31253	-0.688309	-0.023807	-0.371714	0.395616	-1.26198	-0.218231	0.572179
-0.9028	0.754331	-0.230559	1.20844	0.0610744	-0.222934	1.11425	0.163327	-0.196401	0.250638	0.62962	-2.33408	-0.614656	-0.675357	0.803612	0.363988	-0.0588738	0.114277	-0.453832	0.924481	-0.382358	0.178776	-0.143738	0.0497415	0.542599		-1.3664	0.693813	2.08189	-0.107768	0.327206	1.72729	1.0973	0.245729	0.535921	0.827808	0.0411356	-0.8542	0.0377639	0.438439	0.581689	0.162048	0.250294	-0.709903	-0.0456161	-0.457014	0.405717	-1.29997	-0.22286	0.415369
-0.8784	0.765211	-0.197654	1.20656	0.0403539	-0.220199	1.12506	0.166965	-0.160044	0.30603	0.625094	-2.42957	-0.624328	-0.670811	0.820808	0.34273	-0.0343844	0.153947	-0.462589	0.926754	-0.316006	0.227274	-0.165508	0.12811	0.492931		-1.342	0.718727	2.1289	-0.096152	0.374941	1.75128	1.20464	0.229154	0.566915	0.817718	0.106245	-0.915547	0.00526235	0.436879	0.656041	0.197884	0.188111	-0.721377	-0.0590832	-0.531831	0.422588	-1.345	-0.229198	0.228889
-0.854	0.763014	-0.16656	1.19757	0.00959838	-0.212307	1.12922	0.178377	-0.0991306	0.359324	0.616722	-2.50933	-0.642092	-0.661324	0.837712	0.316037	-0.00118811	0.187054	-0.473837	0.930174	-0.251075	0.285813	-0.180418	0.258927	0.461527		-1.3176	0.752504	2.17141	-0.0715581	0.429188	1.77043	1.31362	0.211277	0.599695	0.801762	0.172555	-0.979408	-0.0196186	0.436785	0.73814	0.223498	0.128778	-0.723451	-0.0590985	-0.590894	0.445731	-1.397	-0.236165	0.0111263
-0.8296	0.750126	-0.139643	1.18131	-0.0221915	-0.200522	1.12669	0.193261	-0.0214685	0.404988	0.604348	-2.55405	-0.664704	-0.652217	0.852591	0.285863	0.047396	0.21891	-0.488715	0.938341	-0.195003	0.354308	-0.188495	0.423466	0.457057		-1.2932	0.800119	2.21065	-0.0342558	0.482256	1.78602	1.42543	0.192242	0.634378	0.779316	0.238281	-1.03373	-0.0317313	0.438403	0.82308	0.241561	0.081252	-0.716237	-0.0422453	-0.629961	0.475318	-1.45442	-0.242982	-0.234296
-0.8052	0.730002	-0.117655	1.1584	-0.0455112	-0.186205	1.11765	0.206592	0.0634423	0.441317	0.58754	-2.54332	-0.688572	-0.648233	0.863168	0.256051	0.11637	0.252177	-0.506095	0.95271	-0.154725	0.428195	-0.189881	0.590166	0.482702		-1.2688	0.862748	2.24827	0.0125033	0.529775	1.79927	1.53898	0.170678	0.673406	0.750171	0.301917	-1.06953	-0.0300978	0.442335	0.904153	0.253449	0.0558913	-0.700717	-0.00637827	-0.649656	0.513404	-1.51618	-0.249654	-0.496672
-0.7808	0.707108	-0.0991471	1.13105	-0.0537816	-0.170598	1.10324	0.216286	0.145503	0.470828	0.566376	-2.45838	-0.7136	-0.65186	0.867964	0.230821	0.200577	0.286634	-0.522993	0.969251	-0.13406	0.499717	-0.184517	0.731433	0.538046		-1.2444	0.935944	2.28596	0.0642726	0.570412	1.81264	1.65101	0.145792	0.717718	0.715304	0.362032	-1.08382	-0.0191882	0.447921	0.974876	0.261323	0.0560965	-0.679519	0.0489374	-0.655226	0.559574	-1.58129	-0.256919	-0.757147
-0.7564	0.685593	-0.0814361	1.10235	-0.0439931	-0.155014	1.08555	0.223606	0.213846	0.497719	0.542442	-2.29252	-0.739436	-0.66418	0.867273	0.213962	0.286098	0.321752	-0.535723	0.979495	-0.129601	0.562073	-0.172341	0.829814	0.616125		-1.22	1.01045	2.32477	0.116943	0.602587	1.8293	1.75819	0.120257	0.765488	0.677032	0.418013	-1.07857	-0.00570962	0.452047	1.03106	0.269198	0.0766969	-0.655241	0.121199	-0.65356	0.607773	-1.64672	-0.265631	-0.987289
-0.732	0.668023	-0.062016	1.07536	-0.0151303	-0.140781	1.06695	0.230565	0.258109	0.524196	0.51844	-2.05377	-0.760562	-0.686043	0.862935	0.208323	0.36109	0.358682	-0.54139	0.976806	-0.129992	0.61303	-0.153821	0.876974	0.70331		-1.1956	1.07651	2.36512	0.167475	0.62393	1.85117	1.85939	0.0998084	0.812446	0.639155	0.470934	-1.05647	0.00186532	0.449751	1.07165	0.28124	0.10858	-0.628701	0.204838	-0.650367	0.648524	-1.70643	-0.276227	-1.15345
-0.7076	0.655333	-0.0391027	1.05364	0.030406	-0.128965	1.04892	0.237688	0.272862	0.548169	0.496744	-1.75298	-0.768337	-0.717798	0.856996	0.216002	0.423412	0.39981	-0.539107	0.960464	-0.119761	0.654482	-0.130167	0.870868	0.78546		-1.1712	1.1288	2.40733	0.214434	0.634438	1.87782	1.95627	0.0887207	0.853147	0.605924	0.523363	-1.01874	-0.00684418	0.435604	1.09788	0.299717	0.144387	-0.599147	0.293103	-0.647056	0.674799	-1.75295	-0.288728	-1.23082
-0.6832	0.64789	-0.0112125	1.04101	0.0842734	-0.11992	1.03142	0.244919	0.260991	0.564035	0.478578	-1.39624	-0.757392	-0.758393	0.850565	0.239548	0.478272	0.445979	-0.53009	0.934862	-0.0863204	0.688873	-0.102692	0.81504	0.849057		-1.1468	1.16807	2.45207	0.257925	0.6383	1.90696	2.0519	0.0872572	0.883061	0.579262	0.578092	-0.966342	-0.0391991	0.405443	1.11156	0.324066	0.181479	-0.565647	0.379967	-0.639281	0.687512	-1.78061	-0.30296	-1.21497
-0.6588	0.646467	0.0235595	1.03946	0.135509	-0.113275	1.0131	0.253698	0.232203	0.566106	0.464092	-0.993951	-0.729019	-0.804735	0.843937	0.281507	0.528815	0.494612	-0.516611	0.907918	-0.0271627	0.715427	-0.0722697	0.719238	0.879662		-1.1224	1.19887	2.50024	0.298806	0.642525	1.93533	2.1486	0.0946602	0.899253	0.557008	0.636135	-0.901918	-0.0931181	0.358194	1.11397	0.351601	0.219759	-0.528243	0.460334	-0.620104	0.695118	-1.78669	-0.318598	-1.11533
-0.6344	0.652138	0.067571	1.04845	0.176807	-0.108586	0.992541	0.266457	0.198383	0.552573	0.452971	-0.568596	-0.690106	-0.85195	0.837431	0.342926	0.570476	0.541465	-0.500871	0.888218	0.0483107	0.729314	-0.039599	0.596518	0.869239		-1.098	1.22628	2.55229	0.338161	0.65357	1.95957	2.24654	0.112015	0.900652	0.534069	0.695306	-0.831093	-0.155946	0.296482	1.10594	0.379277	0.258692	-0.487876	0.529514	-0.584905	0.707176	-1.77008	-0.335059	-0.942177
-0.61	0.665378	0.122488	1.066	0.207103	-0.105479	0.969382	0.285181	0.169873	0.527556	0.445405	-0.146914	-0.65044	-0.895164	0.831566	0.4223	0.59518	0.582815	-0.484469	0.880268	0.125245	0.72508	-0.005478	0.460343	0.823517		-1.0736	1.2536	2.60781	0.377188	0.674338	1.97721	2.34388	0.141149	0.890008	0.505265	0.751182	-0.761846	-0.209125	0.225465	1.08895	0.404368	0.298335	-0.445755	0.583344	-0.533633	0.728096	-1.73031	-0.351466	-0.710207
-0.5856	0.685025	0.188027	1.08962	0.231237	-0.103239	0.944785	0.311413	0.152953	0.500245	0.442864	0.253272	-0.617845	-0.931735	0.826239	0.514267	0.597659	0.615445	-0.46803	0.883301	0.193543	0.701165	0.0292507	0.324117	0.756552		-1.0492	1.28076	2.66568	0.416779	0.704234	1.98728	2.43799	0.183462	0.874122	0.467635	0.799754	-0.700447	-0.235047	0.150966	1.06593	0.425115	0.341759	-0.403642	0.619247	-0.470146	0.755936	-1.66844	-0.366633	-0.446998
-0.5612	0.707874	0.262138	1.11632	0.255388	-0.1011	0.920793	0.345666	0.148213	0.481773	0.447707	0.627898	-0.593824	-0.962398	0.819986	0.610008	0.577303	0.637077	-0.451088	0.895431	0.251061	0.661229	0.0636515	0.197207	0.681278		-1.0248	1.30429	2.72463	0.45742	0.740435	1.9903	2.5269	0.239905	0.861215	0.421118	0.839249	-0.647207	-0.223157	0.0782822	1.04086	0.441743	0.393349	-0.36447	0.637296	-0.400267	0.785541	-1.58871	-0.37906	-0.188742
-0.5368	0.729705	0.342687	1.14237	0.280043	-0.0988891	0.899268	0.385819	0.153693	0.480926	0.461427	0.982377	-0.575485	-0.991021	0.810512	0.700041	0.537965	0.647239	-0.43287	0.917147	0.296285	0.611426	0.0967933	0.0791063	0.608861		-1.0004	1.31983	2.78403	0.499774	0.779163	1.98796	2.61007	0.309151	0.85794	0.368354	0.870199	-0.596046	-0.174376	0.0122817	1.01714	0.454765	0.453266	-0.331721	0.639827	-0.329713	0.810803	-1.49834	-0.386968	0.0293094
-0.5124	0.747092	0.428648	1.16429	0.300866	-0.096779	0.881358	0.427551	0.169741	0.500369	0.482982	1.32661	-0.560061	-1.02225	0.796149	0.776408	0.486638	0.646566	-0.413548	0.949799	0.324451	0.55589	0.128109	-0.0362676	0.552214		-0.976	1.32542	2.84401	0.544652	0.819107	1.98284	2.68797	0.385828	0.864779	0.31384	0.894398	-0.539015	-0.101023	-0.0423033	0.995722	0.46206	0.516611	-0.308094	0.629632	-0.262639	0.82642	-1.405	-0.388456	0.182038
-0.488	0.758788	0.519441	1.18032	0.316764	-0.09428	0.867576	0.466375	0.198855	0.536043	0.508846	1.66877	-0.546736	-1.05788	0.776873	0.832652	0.42957	0.636514	-0.394642	0.991167	0.334743	0.495096	0.157464	-0.146283	0.521619		-0.9516	1.32305	2.9048	0.592395	0.862472	1.97795	2.76121	0.462189	0.874437	0.262049	0.913522	-0.473584	-0.0195749	-0.0816283	0.974247	0.459366	0.578629	-0.29532	0.608415	-0.201325	0.832726	-1.31504	-0.382015	0.259106
-0.4636	0.766288	0.613599	1.1909	0.332996	-0.0897494	0.858304	0.498596	0.24273	0.580576	0.534977	2.00757	-0.537619	-1.09595	0.754135	0.86297	0.369421	0.619821	-0.3783	1.03352	0.334401	0.429235	0.184977	-0.236848	0.515618		-0.9272	1.31801	2.96569	0.642966	0.911029	1.97582	2.82973	0.530885	0.877112	0.215902	0.928508	-0.403625	0.0574656	-0.103274	0.947702	0.444071	0.635782	-0.295592	0.576623	-0.146538	0.837609	-1.23449	-0.367352	0.261674
-0.4392	0.773158	0.708287	1.19757	0.354785	-0.0814542	0.854269	0.522499	0.298888	0.628426	0.559135	2.33366	-0.535444	-1.13358	0.730048	0.862792	0.306488	0.599637	-0.36647	1.06717	0.332855	0.360835	0.210895	-0.297016	0.522797		-0.9028	1.31655	3.02469	0.696023	0.964582	1.97713	2.89279	0.586387	0.865129	0.17643	0.940289	-0.331106	0.123357	-0.10566	0.910098	0.417533	0.682003	-0.313096	0.534144	-0.0984246	0.85184	-1.16987	-0.345883	0.20396
-0.4148	0.783224	0.799872	1.20146	0.380403	-0.0694569	0.856269	0.53997	0.357992	0.679456	0.581536	2.63779	-0.537773	-1.16883	0.706425	0.830403	0.242586	0.578004	-0.360513	1.08528	0.336411	0.292964	0.235167	-0.328584	0.533929		-0.8784	1.32274	3.07921	0.750844	1.02223	1.98048	2.95017	0.626257	0.835081	0.14331	0.950647	-0.252818	0.175371	-0.0884786	0.856699	0.383488	0.709519	-0.35324	0.481259	-0.0578974	0.884746	-1.12567	-0.320575	0.116502
-0.3904	0.798907	0.885038	1.20236	0.403999	-0.0560325	0.864323	0.555453	0.405906	0.737943	0.603887	2.91103	-0.537921	-1.19929	0.683891	0.76818	0.184509	0.554964	-0.360952	1.08537	0.348245	0.227492	0.256913	-0.343828	0.546578		-0.854	1.33695	3.12721	0.806976	1.0812	1.98367	3.00307	0.652376	0.790949	0.116048	0.961742	-0.168716	0.214922	-0.0540343	0.786192	0.34566	0.714646	-0.418679	0.419854	-0.0275392	0.941636	-1.10231	-0.295225	0.0334589
-0.366	0.820324	0.961391	1.19938	0.422434	-0.0438168	0.877102	0.57279	0.43081	0.807049	0.627942	3.13664	-0.532281	-1.22137	0.661986	0.683015	0.140888	0.529127	-0.367361	1.06913	0.369942	0.165465	0.274746	-0.356426	0.558733		-0.8296	1.35685	3.16789	0.863743	1.13661	1.98562	3.05337	0.669437	0.743988	0.0950097	0.974758	-0.0866778	0.247997	-0.00684054	0.701768	0.307119	0.700825	-0.505465	0.35411	-0.0108026	1.01991	-1.09741	-0.273302	-0.0250462
-0.3416	0.845139	1.02705	1.19247	0.436315	-0.0337447	0.892081	0.592636	0.430736	0.883698	0.65421	3.28979	-0.522001	-1.23218	0.64064	0.584207	0.114024	0.499059	-0.378481	1.04149	0.401573	0.107622	0.287886	-0.367477	0.564836		-0.8052	1.3794	3.20197	0.918586	1.18477	1.98741	3.1024	0.681413	0.706342	0.0813659	0.989399	-0.0152551	0.281962	0.0477799	0.610099	0.27098	0.675251	-0.603338	0.290176	-0.00964424	1.10775	-1.10706	-0.257042	-0.0573466
-0.3172	0.869513	1.08008	1.18252	0.450116	-0.024904	0.906425	0.61188	0.415298	0.958561	0.681644	3.35468	-0.508895	-1.23135	0.621628	0.479473	0.0991673	0.463084	-0.392308	1.008	0.439737	0.0547255	0.296838	-0.368281	0.558665		-0.7808	1.40226	3.2314	0.967775	1.22668	1.99236	3.15068	0.690371	0.685124	0.0759383	1.00482	0.0436083	0.321005	0.103955	0.518788	0.241372	0.642573	-0.699004	0.235198	-0.022337	1.18798	-1.12575	-0.247319	-0.0727476
-0.2928	0.889722	1.1183	1.1692	0.471629	-0.0159351	0.917997	0.626107	0.39949	1.02023	0.708598	3.33968	-0.491472	-1.22083	0.608698	0.37402	0.0925554	0.418713	-0.405933	0.972987	0.478674	0.00775936	0.303047	-0.361277	0.537824		-0.7564	1.42397	3.25865	1.00881	1.26876	2.00446	3.19815	0.697909	0.682173	0.0780519	1.02058	0.0923149	0.364572	0.15524	0.433998	0.222678	0.602562	-0.780113	0.195439	-0.0434091	1.24539	-1.14616	-0.243844	-0.0808274
-0.2684	0.903392	1.13982	1.14998	0.504104	-0.00609238	0.925555	0.63322	0.395171	1.05936	0.734015	3.27204	-0.464012	-1.20321	0.60613	0.272927	0.0963374	0.364049	-0.415504	0.939916	0.517495	-0.0314047	0.308211	-0.360121	0.505802		-0.732	1.44352	3.28608	1.04132	1.31888	2.02569	3.2445	0.705951	0.695626	0.0852363	1.03661	0.131083	0.409072	0.196012	0.359322	0.216592	0.553441	-0.838867	0.174088	-0.0662072	1.27321	-1.16128	-0.245689	-0.0887756
-0.244	0.910131	1.14407	1.12262	0.54118	0.00483392	0.928292	0.634671	0.405724	1.07107	0.757516	3.186	-0.423043	-1.17987	0.616396	0.181331	0.115765	0.299363	-0.417023	0.912525	0.563228	-0.0585718	0.313772	-0.370188	0.470074		-0.7076	1.46059	3.31535	1.06741	1.38094	2.05424	3.28977	0.71558	0.722805	0.0936624	1.05308	0.156803	0.451015	0.223277	0.296124	0.219895	0.495236	-0.873387	0.170444	-0.0859672	1.27351	-1.16806	-0.252185	-0.106469
-0.2196	0.91117	1.13282	1.08763	0.574388	0.016263	0.925606	0.633759	0.426045	1.0562	0.778452	3.11645	-0.373522	-1.15039	0.638568	0.102433	0.154177	0.227289	-0.40801	0.895086	0.623382	-0.0677845	0.320464	-0.389309	0.438269		-0.6832	1.47619	3.34704	1.09232	1.45428	2.08514	3.33471	0.726161	0.765633	0.0993302	1.0704	0.16865	0.489084	0.237021	0.244639	0.225355	0.431062	-0.885167	0.180233	-0.101208	1.25138	-1.1675	-0.263358	-0.146853
-0.1952	0.908144	1.10973	1.04843	0.601286	0.0263293	0.917258	0.633003	0.448254	1.02051	0.795371	3.09205	-0.323261	-1.11408	0.668769	0.0374737	0.209929	0.151742	-0.388656	0.890757	0.698077	-0.0549886	0.328175	-0.422318	0.413995		-0.6588	1.49247	3.38063	1.12292	1.53484	2.11245	3.38032	0.736946	0.829189	0.0998494	1.08902	0.171006	0.523557	0.239464	0.204391	0.225709	0.367609	-0.874981	0.196121	-0.112717	1.20955	-1.16018	-0.279364	-0.220626
-0.1708	0.902239	1.07845	1.0099	0.623778	0.033697	0.9036	0.632275	0.467796	0.971976	0.80661	3.12724	-0.275183	-1.07136	0.702081	-0.0136535	0.275339	0.0756052	-0.361468	0.900012	0.779578	-0.0212173	0.336243	-0.475641	0.395409		-0.6344	1.511	3.41479	1.16328	1.61507	2.13174	3.4273	0.748913	0.91128	0.095438	1.10906	0.169453	0.554314	0.234913	0.173942	0.218094	0.313433	-0.842584	0.208652	-0.120977	1.15249	-1.14358	-0.299561	-0.329838
-0.1464	0.893951	1.04117	0.976507	0.643189	0.0399584	0.885635	0.628635	0.483876	0.918251	0.811167	3.218	-0.230243	-1.02423	0.734329	-0.0529009	0.337847	4.78e-05	-0.330082	0.921066	0.856749	0.0275005	0.343625	-0.539779	0.380389		-0.61	1.5316	3.44801	1.21244	1.68704	2.14224	3.47566	0.764046	0.999264	0.0881988	1.1303	0.168413	0.581395	0.229818	0.151544	0.204421	0.274831	-0.789296	0.207777	-0.125489	1.09378	-1.1136	-0.322214	-0.464173
-0.122	0.882641	0.998956	0.950265	0.657961	0.0490335	0.86493	0.619253	0.497247	0.865534	0.809276	3.34099	-0.194624	-0.976404	0.762388	-0.0832205	0.384961	-0.0728447	-0.298075	0.950662	0.920512	0.0819878	0.34908	-0.589147	0.370944		-0.5856	1.55292	3.47942	1.26674	1.74642	2.14658	3.52435	0.783896	1.08035	0.0809103	1.15208	0.173384	0.609623	0.230789	0.13701	0.187877	0.252316	-0.718218	0.185234	-0.126783	1.04966	-1.0681	-0.345273	-0.604833
-0.0976	0.866582	0.953289	0.930477	0.66407	0.0655272	0.843633	0.605486	0.510017	0.819047	0.802626	3.45863	-0.178982	-0.932351	0.782961	-0.107139	0.40999	-0.1386	-0.268069	0.984809	0.968738	0.132289	0.351868	-0.596174	0.37222		-0.5612	1.57367	3.50903	1.32333	1.79262	2.14812	3.57166	0.809645	1.14966	0.0766464	1.17395	0.190713	0.650498	0.241644	0.132743	0.171366	0.241484	-0.633016	0.137574	-0.127431	1.0249	-1.00949	-0.367688	-0.733266
-0.0732	0.844919	0.906502	0.91545	0.658851	0.0941173	0.824386	0.592266	0.525526	0.785092	0.793974	3.53336	-0.189863	-0.89548	0.791764	-0.126835	0.411939	-0.193112	-0.241542	1.0206	1.0077	0.171583	0.352512	-0.539966	0.391142		-0.5368	1.59363	3.53715	1.3815	1.82756	2.14892	3.61638	0.842118	1.20674	0.0784558	1.19622	0.225053	0.715925	0.262714	0.142417	0.157762	0.236581	-0.538534	0.0681705	-0.130985	1.01205	-0.943375	-0.390144	-0.838001
-0.0488	0.81968	0.861154	0.904011	0.644929	0.138657	0.810084	0.582949	0.545145	0.772559	0.786469	3.54117	-0.225504	-0.86714	0.784626	-0.143595	0.391862	-0.23525	-0.219273	1.05717	1.04536	0.198952	0.352673	-0.409104	0.431971		-0.5124	1.61348	3.56359	1.44204	1.85543	2.15041	3.65812	0.88099	1.25003	0.0882621	1.21949	0.278893	0.809903	0.292367	0.168534	0.14768	0.232311	-0.441319	-0.0134663	-0.140351	1.00457	-0.87385	-0.414376	-0.912232
-0.0244	0.795603	0.819275	0.895401	0.62957	0.202064	0.803744	0.576742	0.564506	0.79147	0.783112	3.47343	-0.28051	-0.846402	0.759363	-0.156324	0.353981	-0.265071	-0.201919	1.09419	1.08324	0.218132	0.354109	-0.202376	0.488726		-0.488	1.6337	3.58776	1.5055	1.88134	2.15407	3.69667	0.924464	1.27856	0.106383	1.24363	0.350738	0.927819	0.32882	0.210916	0.138006	0.223809	-0.347996	-0.0953918	-0.155964	1.00425	-0.801072	-0.441539	-0.945065
0	0.779029	0.782268	0.888243	0.619191	0.288034	0.808353	0.570723	0.575194	0.85031	0.786689	3.33198	-0.348567	-0.829717	0.716331	-0.162391	0.309285	-0.280831	-0.190712	1.13074	1.11959	0.234763	0.357819	0.0719835	0.544443		-0.4636	1.65403	3.60963	1.57159	1.90947	2.16023	3.73132	0.969413	1.29641	0.132706	1.26756	0.430637	1.06216	0.371476	0.266315	0.124317	0.207125	-0.263236	-0.167687	-0.174452	1.01496	-0.723323	-0.470947	-0.922863
0.0244	0.777188	0.751383	0.880689	0.613715	0.401694	0.826529	0.561952	0.570539	0.954896	0.800067	3.1268	-0.42054	-0.811315	0.657337	-0.160253	0.271671	-0.279442	-0.187835	1.16622	1.15697	0.253353	0.36398	0.39672	0.580022		-0.4392	1.67407	3.6308	1.64025	1.94244	2.16756	3.76128	1.01243	1.31292	0.167645	1.28946	0.499664	1.20537	0.421015	0.328316	0.103157	0.182623	-0.188325	-0.224586	-0.189138	1.03525	-0.640399	-0.500044	-0.840854
0.0488	0.79756	0.727913	0.872211	0.607847	0.547685	0.860103	0.548702	0.549888	1.10742	0.825916	2.87459	-0.486212	-0.785087	0.58453	-0.150681	0.248362	-0.260203	-0.195443	1.20108	1.20072	0.274906	0.37205	0.748751	0.586492		-0.4148	1.69444	3.65466	1.7121	1.9806	2.17405	3.78666	1.05188	1.33854	0.211351	1.30768	0.538565	1.34749	0.477622	0.388046	0.0723762	0.158507	-0.121024	-0.263938	-0.192597	1.05708	-0.555565	-0.52566	-0.70906
0.0732	0.846444	0.7125	0.864114	0.597174	0.727526	0.90941	0.532286	0.519732	1.30444	0.86548	2.59585	-0.537998	-0.747099	0.500608	-0.137001	0.23732	-0.227586	-0.213981	1.2351	1.25308	0.298152	0.380949	1.10365	0.571307		-0.3904	1.71699	3.68509	1.78748	2.0203	2.17803	3.80889	1.08925	1.38039	0.262359	1.32164	0.539966	1.47562	0.538953	0.436682	0.031877	0.146709	-0.0578495	-0.285964	-0.179697	1.06885	-0.474603	-0.545682	-0.54661
0.0976	0.926717	0.704197	0.858167	0.581434	0.937878	0.972627	0.516727	0.490401	1.53623	0.917422	2.31847	-0.571985	-0.697211	0.40954	-0.124814	0.23379	-0.188347	-0.241619	1.26551	1.31245	0.32225	0.390145	1.43829	0.550718		-0.366	1.74367	3.72494	1.86544	2.055	2.17917	3.82994	1.12814	1.44116	0.316911	1.33199	0.509622	1.57979	0.60006	0.468835	-0.0159313	0.153038	0.00272984	-0.292539	-0.149001	1.0633	-0.402951	-0.559893	-0.36961
0.122	1.0365	0.700571	0.856246	0.563896	1.17003	1.04611	0.505221	0.472327	1.78836	0.977731	2.08328	-0.589578	-0.639053	0.316245	-0.120145	0.235264	-0.146254	-0.274907	1.28877	1.37413	0.347201	0.400841	1.73506	0.535001		-0.3416	1.77529	3.77497	1.94451	2.07889	2.17865	3.85114	1.17171	1.52258	0.369323	1.33992	0.455985	1.65861	0.655302	0.484237	-0.0670518	0.175239	0.0590022	-0.287035	-0.102889	1.04348	-0.343435	-0.569636	-0.18394
0.1464	1.16933	0.699018	0.860657	0.548865	1.41117	1.1254	0.498057	0.475537	2.0447	1.04081	1.93609	-0.597598	-0.578298	0.225479	-0.128181	0.24168	-0.102028	-0.309801	1.30312	1.42908	0.373134	0.415527	1.98747	0.522488		-0.3172	1.81118	3.8337	2.02466	2.08895	2.17786	3.87289	1.22208	1.62783	0.413493	1.34638	0.383748	1.71766	0.700867	0.486474	-0.116638	0.212622	0.108174	-0.274459	-0.0473024	1.02063	-0.29635	-0.576716	0.00908595
0.1708	1.31498	0.698068	0.873863	0.539951	1.64759	1.20584	0.494083	0.505604	2.29087	1.10125	1.90721	-0.601741	-0.520416	0.141149	-0.153572	0.255214	-0.0564176	-0.342717	1.30816	1.46624	0.399597	0.436057	2.20304	0.50605		-0.2928	1.84869	3.89792	2.10774	2.08431	2.17672	3.89527	1.28133	1.75783	0.444655	1.35145	0.297242	1.76485	0.736235	0.480423	-0.160494	0.271838	0.149306	-0.260898	0.0102694	1.00773	-0.261367	-0.582222	0.202421
0.1952	1.46138	0.69778	0.898777	0.538081	1.86784	1.28312	0.492156	0.556956	2.51631	1.15524	1.99964	-0.601169	-0.469505	0.0662014	-0.199449	0.277545	-0.0105537	-0.371063	1.30449	1.4782	0.423821	0.462244	2.40306	0.482195		-0.2684	1.88361	3.96353	2.1957	2.06648	2.17323	3.91866	1.35023	1.9059	0.460143	1.3545	0.205227	1.80731	0.763752	0.470444	-0.198758	0.360752	0.182741	-0.251767	0.0642671	1.01383	-0.238122	-0.58636	0.381377
0.2196	1.59744	0.699278	0.938274	0.53853	2.0642	1.35382	0.490543	0.615217	2.71343	1.20082	2.20259	-0.59137	-0.428188	0.00274219	-0.265196	0.306228	0.0346787	-0.3934	1.29329	1.46225	0.440548	0.492269	2.62189	0.452629		-0.244	1.91265	4.02604	2.28868	2.04175	2.16502	3.94388	1.42709	2.05909	0.459628	1.35537	0.118075	1.84916	0.786955	0.459808	-0.237428	0.481517	0.207878	-0.250429	0.112169	1.04217	-0.225366	-0.589135	0.531378
0.244	1.71539	0.703626	0.992804	0.533799	2.2331	1.41572	0.486855	0.667186	2.87639	1.23755	2.51124	-0.569484	-0.397716	-0.0479508	-0.345597	0.337307	0.0769248	-0.40976	1.27671	1.41927	0.444962	0.524021	2.9037	0.420645		-0.2196	1.93614	4.08087	2.3851	2.02001	2.1509	3.97174	1.50884	2.20601	0.445488	1.35552	0.0404212	1.89102	0.808613	0.451099	-0.284065	0.629147	0.223267	-0.258442	0.153592	1.09145	-0.221644	-0.59101	0.647091
0.2684	1.81186	0.710726	1.05933	0.52197	2.37457	1.46777	0.479886	0.705161	3.00249	1.26605	2.92884	-0.536763	-0.377686	-0.0856637	-0.4323	0.368703	0.110806	-0.421445	1.2605	1.35391	0.434588	0.55585	3.28881	0.388971		-0.1952	1.9584	4.12409	2.48266	2.00795	2.13077	4.00197	1.59153	2.34286	0.422287	1.35738	-0.0273482	1.9337	0.830131	0.447166	-0.342441	0.792377	0.228106	-0.276431	0.190019	1.15771	-0.226088	-0.593284	0.735753
0.2928	1.88732	0.719144	1.13316	0.509725	2.49063	1.51019	0.470076	0.725477	3.09331	1.2873	3.45762	-0.498275	-0.365852	-0.111076	-0.516836	0.397276	0.129618	-0.430082	1.25347	1.27523	0.409514	0.586488	3.79416	0.359671		-0.1708	1.98533	4.15388	2.57854	2.00515	2.10608	4.03269	1.67072	2.47236	0.395011	1.36277	-0.0800286	1.98147	0.852623	0.451836	-0.411593	0.955778	0.222659	-0.304484	0.223637	1.2375	-0.237326	-0.597943	0.812304
0.3172	1.94408	0.726956	1.21042	0.505298	2.58339	1.54452	0.457146	0.729621	3.15317	1.3022	4.09192	-0.460955	-0.358755	-0.1249	-0.59366	0.416233	0.128828	-0.436885	1.26178	1.19705	0.37325	0.614915	4.40412	0.337408		-0.1464	2.02119	4.1717	2.6694	2.00791	2.08078	4.06078	1.74239	2.59793	0.368021	1.37187	-0.107472	2.0393	0.877408	0.469754	-0.486992	1.10406	0.207241	-0.342112	0.256278	1.33039	-0.252312	-0.606731	0.889006
0.3416	1.98425	0.733009	1.28817	0.509146	2.65381	1.57355	0.439068	0.724148	3.18733	1.3115	4.812	-0.430648	-0.352699	-0.127054	-0.660695	0.418738	0.109734	-0.442356	1.28563	1.13232	0.331421	0.640434	5.07877	0.330314		-0.122	2.06624	4.18183	2.75175	2.01449	2.06005	4.08273	1.8031	2.71811	0.345643	1.38368	-0.104002	2.10897	0.905776	0.505351	-0.561088	1.22868	0.181514	-0.388288	0.290434	1.43536	-0.266175	-0.620366	0.969454
0.366	2.0086	0.737526	1.36246	0.512721	2.70184	1.60121	0.414437	0.715791	3.20151	1.31593	5.57734	-0.408645	-0.344703	-0.116083	-0.716697	0.402483	0.0808969	-0.446187	1.32172	1.0842	0.287534	0.662702	5.76327	0.344157		-0.0976	2.11723	4.18955	2.82236	2.02581	2.04758	4.09579	1.85062	2.82676	0.332439	1.3969	-0.0715411	2.1899	0.938967	0.561281	-0.624719	1.3293	0.145508	-0.441401	0.330036	1.54396	-0.273408	-0.638542	1.05229
0.3904	2.01622	0.741533	1.42857	0.505532	2.72745	1.63151	0.384617	0.70814	3.20149	1.31625	6.33058	-0.390676	-0.333128	-0.0891242	-0.759178	0.369819	0.054237	-0.447808	1.36567	1.04693	0.242217	0.681707	6.38876	0.377549		-0.0732	2.16987	4.19888	2.87827	2.04438	2.04484	4.09899	1.88571	2.91834	0.331571	1.41091	-0.0141605	2.28261	0.977918	0.637253	-0.669865	1.40526	0.101152	-0.49879	0.37913	1.64201	-0.270131	-0.660008	1.13537
0.4148	2.00553	0.745992	1.48319	0.482172	2.73233	1.66693	0.352976	0.70208	3.19258	1.31316	7.01581	-0.370359	-0.317651	-0.0431698	-0.785718	0.326332	0.0382228	-0.447311	1.41225	1.01317	0.197347	0.697725	6.88747	0.420051		-0.0488	2.22063	4.21151	2.91681	2.07457	2.05203	4.0934	1.9126	2.99026	0.342903	1.42635	0.0643773	2.38994	1.02284	0.729769	-0.692698	1.44995	0.0529597	-0.556521	0.43885	1.72039	-0.254489	-0.682614	1.21455
0.4392	1.97695	0.751642	1.52497	0.444126	2.72095	1.70773	0.322989	0.697742	3.1802	1.30706	7.59481	-0.344372	-0.2985	0.0229814	-0.796445	0.279988	0.0343774	-0.445346	1.45593	0.976725	0.158171	0.710907	7.21996	0.454259		-0.0244	2.26724	4.22746	2.93619	2.11954	2.06929	4.08175	1.93755	3.03981	0.363737	1.44477	0.15744	2.51183	1.07305	0.832596	-0.695183	1.4577	0.00733759	-0.610282	0.505526	1.78035	-0.225196	-0.703642	1.28529
0.4636	1.93484	0.75956	1.55396	0.39715	2.69982	1.75296	0.297472	0.697553	3.16999	1.29787	8.04909	-0.315857	-0.275561	0.107617	-0.793927	0.238202	0.0396284	-0.442029	1.49299	0.931895	0.130306	0.720879	7.37886	0.465291		0	2.30938	4.2466	2.93702	2.17557	2.097	4.06782	1.96677	3.06375	0.391676	1.46729	0.253796	2.63969	1.1273	0.938437	-0.683394	1.43295	-0.0293622	-0.657217	0.57233	1.8275	-0.180891	-0.72013	1.34753
0.488	1.88655	0.771495	1.57212	0.347748	2.67603	1.80213	0.278573	0.705303	3.16673	1.28522	8.37483	-0.294023	-0.248539	0.206323	-0.780651	0.205786	0.0506065	-0.436498	1.52392	0.877011	0.11602	0.727275	7.37072	0.450575		0.0244	2.34883	4.26944	2.92311	2.2325	2.1354	4.05536	2.00465	3.06363	0.42577	1.49353	0.341845	2.76028	1.18411	1.04155	-0.66438	1.39109	-0.0519259	-0.697099	0.632109	1.86561	-0.119662	-0.729132	1.40331
0.5124	1.8391	0.789182	1.583	0.302047	2.65511	1.8555	0.267249	0.719626	3.17315	1.26913	8.57872	-0.289773	-0.217783	0.312925	-0.757411	0.187143	0.065022	-0.427628	1.55284	0.820283	0.113815	0.730555	7.20803	0.420737		0.0488	2.38883	4.2968	2.90028	2.28064	2.1847	4.04696	2.0524	3.04783	0.465158	1.52166	0.416285	2.86477	1.24196	1.13937	-0.644333	1.35029	-0.0564581	-0.731166	0.679078	1.89744	-0.0398875	-0.728057	1.44968
0.5368	1.79704	0.813211	1.58922	0.264824	2.6386	1.91316	0.263429	0.731626	3.18933	1.25019	8.67382	-0.309782	-0.184598	0.42055	-0.723605	0.186074	0.0807281	-0.414986	1.58337	0.777932	0.119578	0.731894	6.91456	0.391806		0.0732	2.4336	4.32907	2.87412	2.31638	2.2452	4.04385	2.10752	3.02592	0.507987	1.54937	0.478594	2.95227	1.29991	1.23196	-0.627687	1.32232	-0.0416387	-0.759533	0.71087	1.92515	0.056114	-0.714765	1.47451
0.5612	1.76223	0.842438	1.59037	0.236888	2.62409	1.9742	0.267861	0.730368	3.21274	1.22867	8.67776	-0.352861	-0.150674	0.522816	-0.678725	0.200591	0.0955972	-0.39964	1.61523	0.763812	0.126731	0.732364	6.53099	0.378517		0.0976	2.48744	4.36591	2.84828	2.34113	2.31599	4.04644	2.16501	3.00371	0.551791	1.57497	0.529651	3.02742	1.35782	1.32063	-0.616639	1.30958	-0.0101564	-0.779736	0.729879	1.94844	0.161211	-0.687779	1.45738
0.5856	1.73372	0.874315	1.5838	0.217345	2.60865	2.0366	0.282327	0.709978	3.23793	1.20349	8.61409	-0.410233	-0.11714	0.615295	-0.624181	0.220627	0.107971	-0.384153	1.64454	0.779355	0.126922	0.732151	6.11868	0.392659		0.122	2.55295	4.4061	2.82337	2.35492	2.39362	4.05519	2.21857	2.98315	0.594976	1.59778	0.56457	3.09542	1.41595	1.4065	-0.6114	1.30744	0.0320109	-0.787212	0.741075	1.9668	0.267681	-0.646809	1.37982
0.61	1.70771	0.906042	1.56752	0.210421	2.59186	2.09755	0.306857	0.672435	3.25654	1.17243	8.50553	-0.468944	-0.0845242	0.696273	-0.56306	0.232185	0.116099	-0.370908	1.66719	0.809867	0.112836	0.730122	5.74665	0.439228		0.1464	2.62972	4.44767	2.79728	2.35266	2.47292	4.0707	2.26166	2.96313	0.638286	1.61765	0.577742	3.15688	1.47431	1.49005	-0.610519	1.30802	0.0789498	-0.777262	0.748873	1.98325	0.370735	-0.592922	1.24142
0.6344	1.67957	0.935882	1.54242	0.224419	2.57579	2.15415	0.338285	0.624171	3.25933	1.13358	8.36154	-0.51716	-0.0534612	0.765799	-0.498395	0.225945	0.118041	-0.36026	1.6802	0.82991	0.0816627	0.724508	5.45786	0.511067		0.1708	2.71489	4.48823	2.76687	2.32753	2.54905	4.093	2.28954	2.94118	0.684476	1.634	0.570153	3.20814	1.53172	1.57134	-0.610553	1.30451	0.128437	-0.747606	0.755934	2.00226	0.46848	-0.528197	1.06443
0.6588	1.64668	0.963605	1.51179	0.262184	2.56319	2.20442	0.372297	0.572873	3.23986	1.08687	8.17872	-0.547071	-0.0250065	0.824142	-0.433259	0.203773	0.112759	-0.350829	1.68063	0.818482	0.0365906	0.714673	5.25601	0.590107		0.1952	2.80423	4.52556	2.72932	2.2743	2.61845	4.12074	2.30003	2.91695	0.735959	1.64569	0.54841	3.24685	1.5856	1.65042	-0.605466	1.29403	0.182399	-0.699954	0.763089	2.02436	0.559849	-0.45524	0.880407
0.6832	1.60943	0.989623	1.47902	0.317458	2.55657	2.24771	0.406498	0.528323	3.1973	1.03473	7.95191	-0.554954	-0.000256447	0.871444	-0.371715	0.17562	0.100377	-0.341125	1.66705	0.773234	-0.0152442	0.702111	5.13	0.655985		0.2196	2.89244	4.5575	2.68304	2.19094	2.67866	4.15135	2.2925	2.89392	0.792238	1.65132	0.522178	3.27516	1.63313	1.72708	-0.58782	1.27614	0.243584	-0.639479	0.770027	2.04576	0.642406	-0.376724	0.716499
0.7076	1.56998	1.01358	1.4451	0.382019	2.55772	2.28394	0.44194	0.500568	3.13621	0.981418	7.68086	-0.542147	0.0210271	0.908303	-0.318422	0.152493	0.0816102	-0.330128	1.64254	0.707096	-0.0670685	0.689455	5.07774	0.696279		0.244	2.97338	4.5813	2.62865	2.08224	2.72826	4.18156	2.26719	2.87726	0.849037	1.64935	0.503941	3.29751	1.67295	1.8003	-0.552144	1.25153	0.311419	-0.572553	0.775762	2.06367	0.71211	-0.295063	0.591409
0.732	1.53026	1.03387	1.40796	0.451984	2.56691	2.31271	0.48151	0.494134	3.06414	0.931054	7.37643	-0.514373	0.0415243	0.936059	-0.277083	0.142995	0.0568621	-0.316994	1.6138	0.634414	-0.115332	0.678741	5.10035	0.711054		0.2684	3.04114	4.59364	2.56858	1.95985	2.76636	4.20768	2.2251	2.86885	0.899559	1.63859	0.503271	3.31577	1.7054	1.86803	-0.496751	1.22458	0.38121	-0.504004	0.77861	2.07923	0.765276	-0.212483	0.513553
0.7564	1.49115	1.0488	1.36442	0.525137	2.58264	2.3332	0.526661	0.505503	2.98817	0.886071	7.06844	-0.478176	0.0651828	0.956799	-0.24787	0.150869	0.0255528	-0.301166	1.58865	0.565105	-0.158853	0.670581	5.175	0.7082		0.2928	3.09127	4.59156	2.50484	1.8355	2.79194	4.22583	2.16831	2.86266	0.937199	1.61896	0.522348	3.32658	1.73084	1.92773	-0.423058	1.20298	0.446812	-0.435642	0.77733	2.09517	0.800251	-0.131401	0.476917
0.7808	1.4529	1.05795	1.31266	0.597698	2.60258	2.3446	0.575968	0.527389	2.91193	0.846876	6.79646	-0.438212	0.0951746	0.973092	-0.226908	0.173181	-0.0130839	-0.282828	1.57466	0.503557	-0.196458	0.664282	5.23948	0.696168		0.3172	3.12152	4.57336	2.43754	1.71646	2.80417	4.23269	2.10066	2.84604	0.958489	1.59144	0.559134	3.32431	1.74834	1.97714	-0.334826	1.1925	0.502041	-0.367064	0.772087	2.1132	0.817111	-0.0544796	0.462315
0.8052	1.41521	1.06232	1.25369	0.665297	2.62536	2.34622	0.62532	0.554141	2.8353	0.812691	6.58852	-0.396941	0.132988	0.98684	-0.209987	0.201949	-0.0593225	-0.263325	1.57729	0.449367	-0.226905	0.658436	5.21656	0.68196		0.3416	3.1321	4.53875	2.3665	1.60829	2.80271	4.22646	2.02757	2.80805	0.96429	1.55705	0.609056	3.30511	1.75619	2.01473	-0.237583	1.19536	0.540053	-0.297684	0.763144	2.13529	0.817379	0.0156911	0.449156
0.8296	1.3771	1.06301	1.19165	0.721374	2.65141	2.33744	0.668542	0.581612	2.75661	0.782874	6.45319	-0.356607	0.178005	0.998275	-0.194792	0.227812	-0.11314	-0.245363	1.59763	0.403498	-0.250235	0.651813	5.05596	0.670277		0.366	3.12486	4.48853	2.29313	1.51746	2.78712	4.2075	1.9546	2.74783	0.958192	1.51617	0.665657	3.26835	1.75268	2.03995	-0.137443	1.2123	0.554691	-0.228402	0.749112	2.16391	0.805039	0.076955	0.427835
0.854	1.33703	1.06028	1.13206	0.756661	2.68237	2.31753	0.699688	0.605241	2.67521	0.75728	6.3834	-0.319976	0.22708	1.00647	-0.178298	0.242818	-0.17315	-0.23277	1.63215	0.369872	-0.266968	0.64402	4.75447	0.659147		0.3904	3.10193	4.4245	2.21953	1.44748	2.75654	4.17787	1.88602	2.67434	0.943898	1.46862	0.725782	3.21604	1.73649	2.05328	-0.0396555	1.24115	0.543786	-0.162118	0.727497	2.19872	0.785877	0.127966	0.400642
0.8784	1.2938	1.05378	1.07908	0.765917	2.7194	2.28575	0.716001	0.620082	2.59255	0.735425	6.36173	-0.287138	0.275109	1.01025	-0.155225	0.24104	-0.234739	-0.229743	1.67424	0.350446	-0.276054	0.635409	4.35421	0.64055		0.4148	3.06522	4.34908	2.14607	1.39429	2.71055	4.13992	1.82438	2.59952	0.923341	1.4143	0.792712	3.15171	1.70761	2.05548	0.0513478	1.27454	0.510263	-0.10245	0.697953	2.2354	0.764268	0.168494	0.374453
0.9028	1.24811	1.04296	1.03519	0.752551	2.76166	2.2418	0.718051	0.62152	2.51121	0.715674	6.36897	-0.255238	0.317236	1.00845	-0.121229	0.218184	-0.290094	-0.239524	1.71631	0.345062	-0.275163	0.626942	3.92565	0.610534		0.4392	3.01759	4.26493	2.07087	1.34859	2.65036	4.0951	1.77001	2.53262	0.895911	1.35373	0.870447	3.07943	1.66799	2.0468	0.130402	1.30225	0.459757	-0.0515305	0.664177	2.26937	0.741234	0.199373	0.357518
0.9272	1.20272	1.02731	1.00298	0.724322	2.80632	2.18659	0.70768	0.60919	2.43335	0.695177	6.38945	-0.22347	0.351459	1.00013	-0.0757287	0.172691	-0.331237	-0.262841	1.75205	0.354474	-0.263032	0.620183	3.53813	0.575782		0.4636	2.96405	4.17461	1.99176	1.30257	2.57919	4.04355	1.7206	2.47663	0.8596	1.28793	0.955008	3.00186	1.62089	2.02727	0.191671	1.31628	0.398052	-0.0092941	0.631057	2.29925	0.714839	0.22198	0.360947
0.9516	1.16068	1.00673	0.985153	0.688588	2.85002	2.12224	0.686997	0.591792	2.35916	0.670729	6.41104	-0.194471	0.379631	0.985306	-0.0214214	0.106873	-0.354029	-0.297225	1.77835	0.378007	-0.24079	0.616584	3.23804	0.548307		0.488	2.91072	4.08019	1.90856	1.25269	2.50114	3.98444	1.67273	2.42784	0.81357	1.21792	1.03489	2.92144	1.56977	1.9975	0.231232	1.31455	0.331116	0.0250209	0.601456	2.32663	0.681179	0.237663	0.396044
0.976	1.12357	0.981599	0.982627	0.651445	2.89024	2.05132	0.658527	0.583883	2.28583	0.64074	6.43024	-0.171273	0.405961	0.965631	0.0363246	0.026298	-0.359324	-0.337756	1.79512	0.409431	-0.211643	0.616697	3.03862	0.53678		0.5124	2.86149	3.98276	1.82319	1.19783	2.41984	3.91685	1.62363	2.3819	0.759894	1.14416	1.09897	2.84502	1.51713	1.95889	0.24899	1.30088	0.266287	0.0510298	0.576091	2.35297	0.636556	0.247659	0.468908
1.0004	1.09172	0.952255	0.993867	0.615504	2.92556	1.97569	0.624927	0.595985	2.20872	0.606963	6.45845	-0.155563	0.434061	0.944341	0.090368	-0.0607225	-0.351062	-0.378504	1.8028	0.43855	-0.180503	0.620582	2.91532	0.542571		0.5368	2.81599	3.8826	1.73852	1.13858	2.33811	3.84089	1.57095	2.33975	0.703367	1.06645	1.13974	2.78295	1.46338	1.91347	0.247634	1.2806	0.210674	0.0668688	0.553532	2.3764	0.579987	0.253168	0.579092
1.0248	1.0661	0.918685	1.01543	0.578248	2.95545	1.8965	0.588658	0.630867	2.12493	0.573872	6.51318	-0.147515	0.465037	0.925191	0.134791	-0.144065	-0.333668	-0.413802	1.80028	0.457717	-0.153992	0.628523	2.81848	0.559967		0.5612	2.77085	3.77988	1.65737	1.07769	2.25755	3.75813	1.51239	2.30383	0.649514	0.984182	1.15264	2.74382	1.40699	1.86369	0.231216	1.2565	0.167078	0.0705211	0.529764	2.39232	0.514003	0.255079	0.719192
1.0492	1.04991	0.8811	1.0421	0.535342	2.98034	1.8154	0.552657	0.687793	2.0359	0.545926	6.60256	-0.14647	0.498445	0.910981	0.167551	-0.214976	-0.309642	-0.439047	1.78606	0.467592	-0.138652	0.640604	2.69244	0.577444		0.5856	2.72197	3.6751	1.58132	1.01947	2.1781	3.67116	1.4471	2.27274	0.602095	0.896789	1.13819	2.73231	1.34631	1.81204	0.205559	1.23088	0.132987	0.061629	0.500565	2.39729	0.44419	0.254062	0.869427
1.0736	1.04791	0.840783	1.06741	0.486078	3.00171	1.73539	0.520545	0.762962	1.9469	0.525161	6.72508	-0.152083	0.534707	0.902577	0.189929	-0.26999	-0.279518	-0.45132	1.76124	0.474834	-0.137061	0.655551	2.48769	0.580866		0.61	2.66594	3.56895	1.50987	0.968137	2.09843	3.58279	1.37692	2.24396	0.562132	0.804548	1.10421	2.74792	1.28168	1.76084	0.177544	1.20819	0.103654	0.0423034	0.465575	2.39215	0.377043	0.251328	0.995208
1.098	1.06394	0.800504	1.08613	0.436105	3.02192	1.66022	0.4945	0.845586	1.8639	0.510622	6.88097	-0.163974	0.575375	0.898783	0.203424	-0.311872	-0.244955	-0.450051	1.72957	0.483041	-0.147224	0.670675	2.18112	0.56137		0.6344	2.60109	3.4621	1.44129	0.926421	2.01671	3.49548	1.30542	2.21555	0.528686	0.709132	1.06172	2.78311	1.21586	1.71224	0.152639	1.1916	0.0749718	0.0161627	0.428607	2.38123	0.316397	0.24884	1.05719
1.1224	1.09885	0.764138	1.09653	0.39391	3.04386	1.59321	0.473781	0.919548	1.79014	0.499437	7.07314	-0.181545	0.620612	0.896874	0.207823	-0.346397	-0.209327	-0.437272	1.69539	0.489754	-0.166308	0.683461	1.79245	0.521472		0.6588	2.52835	3.35539	1.37392	0.894139	1.93166	3.41137	1.23566	2.18264	0.500071	0.61321	1.01613	2.82395	1.15186	1.66807	0.133648	1.17904	0.0441746	-0.0138407	0.392603	2.36783	0.262424	0.24825	1.02369
1.1468	1.15008	0.735388	1.09996	0.363937	3.06972	1.53625	0.457243	0.972335	1.72493	0.488526	7.29564	-0.205521	0.667245	0.893731	0.202661	-0.377596	-0.173976	-0.416889	1.66336	0.492662	-0.19151	0.692987	1.37424	0.47139		0.6832	2.4509	3.24978	1.30639	0.864857	1.8436	3.33226	1.16936	2.13796	0.474753	0.519024	0.962646	2.8542	1.09047	1.62927	0.120485	1.1658	0.0096879	-0.046995	0.355345	2.35227	0.214107	0.24956	0.876806
1.1712	1.21226	0.716603	1.09837	0.344691	3.0995	1.4893	0.446191	1.00301	1.66459	0.476113	7.52913	-0.237382	0.709658	0.887516	0.189571	-0.404539	-0.137703	-0.393157	1.63882	0.492921	-0.217753	0.699804	0.990929	0.421235		0.7076	2.37218	3.14635	1.23746	0.826699	1.75402	3.25896	1.10731	2.07666	0.451532	0.427182	0.890655	2.85995	1.03019	1.59518	0.110776	1.14931	-0.028218	-0.0842143	0.311512	2.33365	0.170751	0.250916	0.616582
1.1956	1.27774	0.708616	1.09244	0.333699	3.13022	1.45099	0.44411	1.02149	1.60538	0.462243	7.74536	-0.27635	0.742353	0.878957	0.171989	-0.422713	-0.101557	-0.369382	1.62587	0.490893	-0.239261	0.70484	0.695593	0.377086		0.732	2.29387	3.04642	1.16594	0.771045	1.66392	3.1904	1.04936	1.99836	0.428552	0.336898	0.792407	2.83272	0.969288	1.56395	0.102234	1.12953	-0.0674245	-0.125584	0.256734	2.30992	0.130839	0.249435	0.261463
1.22	1.33888	0.711397	1.0823	0.331816	3.15691	1.41976	0.454616	1.04022	1.54697	0.447982	7.91555	-0.31771	0.761636	0.871242	0.153024	-0.428375	-0.0711224	-0.34759	1.62523	0.484089	-0.253042	0.708327	0.503402	0.340511		0.7564	2.21542	2.95118	1.09105	0.69988	1.57275	3.12343	0.994212	1.90663	0.402745	0.247501	0.668924	2.77213	0.9073	1.53383	0.093904	1.10722	-0.106228	-0.168426	0.189278	2.2776	0.0911259	0.24217	-0.156528
1.2444	1.39162	0.724838	1.0687	0.339611	3.17542	1.39421	0.479284	1.06526	1.49319	0.434221	8.02159	-0.354561	0.765945	0.868699	0.13415	-0.419829	-0.0529366	-0.328932	1.63531	0.469214	-0.257914	0.709646	0.388455	0.310312		0.7808	2.13512	2.8611	1.01288	0.624553	1.47895	3.05382	0.939295	1.8088	0.371524	0.159712	0.529742	2.68654	0.845259	1.50435	0.0845404	1.08499	-0.145698	-0.207943	0.11223	2.23355	0.0477089	0.227202	-0.595562
1.2688	1.43734	0.749031	1.05274	0.350063	3.18514	1.37271	0.516666	1.09361	1.44931	0.421146	8.05674	-0.382378	0.756183	0.874655	0.114485	-0.396516	-0.0502644	-0.314251	1.65406	0.442944	-0.251867	0.708112	0.313667	0.284443		0.8052	2.05135	2.77596	0.932251	0.558712	1.38129	2.9779	0.880034	1.71394	0.334722	0.0754116	0.387946	2.58999	0.785046	1.4762	0.0713816	1.06713	-0.189442	-0.239669	0.0344514	2.17731	-0.00194819	0.204745	-1.0061
1.2932	1.48101	0.783714	1.03521	0.350678	3.1884	1.35348	0.562805	1.11815	1.41882	0.408306	8.02026	-0.400297	0.734979	0.889276	0.0909191	-0.359871	-0.0626707	-0.303982	1.67907	0.403993	-0.23264	0.703707	0.255558	0.258832		0.8296	1.96323	2.69536	0.850777	0.510916	1.27988	2.89403	0.810916	1.62921	0.294052	-0.0038777	0.254492	2.49891	0.728305	1.45039	0.0509622	1.0545	-0.240392	-0.261421	-0.0336915	2.11303	-0.0573396	0.176996	-1.33473
1.3176	1.52752	0.827518	1.01651	0.334863	3.18699	1.33525	0.612744	1.13334	1.40143	0.395128	7.9213	-0.408793	0.70457	0.909258	0.0604027	-0.31317	-0.0874967	-0.297161	1.70797	0.355301	-0.19942	0.696865	0.201266	0.22748		0.854	1.87169	2.61912	0.77151	0.481842	1.17589	2.80307	0.729835	1.55696	0.251226	-0.0783636	0.135024	2.42928	0.675142	1.42765	0.0204514	1.042	-0.29817	-0.273659	-0.0852277	2.04794	-0.11443	0.14639	-1.52993
1.342	1.57865	0.878044	0.996831	0.306559	3.18014	1.31778	0.662422	1.1364	1.39312	0.381775	7.77707	-0.411147	0.666429	0.929579	0.02237	-0.260006	-0.120626	-0.291063	1.7389	0.30261	-0.153337	0.687528	0.137548	0.188773		0.8784	1.78034	2.54722	0.697991	0.46663	1.07105	2.70778	0.640387	1.49406	0.206944	-0.14995	0.0298601	2.39054	0.623633	1.40833	-0.0218753	1.02371	-0.360498	-0.278684	-0.117084	1.98773	-0.166004	0.11398	-1.54831
1.3664	1.63243	0.932735	0.97566	0.275171	3.16624	1.30193	0.708754	1.12651	1.38861	0.369605	7.59716	-0.414427	0.622884	0.945513	-0.0210315	-0.205108	-0.15764	-0.282748	1.76931	0.251299	-0.0976757	0.674626	0.0496464	0.150722		0.9028	1.69443	2.47932	0.632256	0.457381	0.96727	2.61139	0.54936	1.43428	0.160823	-0.22082	-0.0641015	2.37966	0.570649	1.39269	-0.0769684	0.998038	-0.425231	-0.280016	-0.128135	1.93374	-0.202349	0.0793441	-1.36242
1.3908	1.6845	0.989278	0.951296	0.25011	3.1454	1.28921	0.747643	1.10545	1.38455	0.360609	7.38063	-0.423725	0.577255	0.953827	-0.0666257	-0.154297	-0.195203	-0.271226	1.79514	0.203102	-0.0378494	0.656718	-0.0687693	0.126137		0.9272	1.61836	2.4143	0.574472	0.445009	0.865564	2.51628	0.463507	1.37326	0.112477	-0.291896	-0.150009	2.38601	0.513119	1.38077	-0.144153	0.967758	-0.48942	-0.282206	-0.117936	1.88395	-0.21233	0.0416637	-0.968944
1.4152	1.73058	1.04489	0.921548	0.235067	3.11965	1.28134	0.773686	1.07751	1.38139	0.356168	7.13573	-0.437853	0.532476	0.953293	-0.112376	-0.111476	-0.229692	-0.258101	1.8115	0.157407	0.0193748	0.633168	-0.207248	0.123129		0.9516	1.55469	2.35062	0.52361	0.422975	0.765531	2.42334	0.386856	1.31385	0.0636884	-0.362279	-0.226282	2.40415	0.449237	1.37217	-0.219517	0.937142	-0.548504	-0.290089	-0.0861575	1.83521	-0.183663	0.00122803	-0.390082
1.4396	1.76897	1.09541	0.885413	0.224128	3.0911	1.27985	0.783105	1.04787	1.3826	0.356101	6.89004	-0.452788	0.490743	0.94469	-0.158149	-0.078196	-0.25408	-0.246438	1.81405	0.117703	0.0679453	0.60504	-0.343398	0.142568		0.976	1.50564	2.28738	0.477887	0.390967	0.667027	2.33265	0.318877	1.26661	0.0196772	-0.429676	-0.284601	2.43844	0.379983	1.36581	-0.297215	0.908983	-0.597903	-0.307517	-0.0319807	1.78418	-0.103348	-0.0392954	0.333592
1.464	1.80153	1.13582	0.844045	0.208623	3.06031	1.28564	0.776353	1.02	1.39232	0.358912	6.67473	-0.467002	0.453684	0.930463	-0.204708	-0.0557875	-0.25814	-0.238935	1.80058	0.0927576	0.105319	0.575273	-0.448188	0.182232		1.0004	1.47593	2.22523	0.435391	0.357727	0.57233	2.24495	0.256784	1.24523	-0.0109373	-0.491261	-0.314913	2.49992	0.310496	1.36015	-0.373173	0.885	-0.633895	-0.335934	0.0451176	1.72704	0.0396732	-0.0743934	1.15154
1.4884	1.83239	1.16249	0.800073	0.188128	3.02648	1.29816	0.757691	0.993747	1.41284	0.362948	6.50625	-0.481522	0.42158	0.914158	-0.252159	-0.0454531	-0.23292	-0.23629	1.77218	0.089251	0.132356	0.548124	-0.488436	0.240515		1.0248	1.47649	2.16694	0.39519	0.341678	0.486791	2.16278	0.200519	1.26472	-0.0161777	-0.54408	-0.31133	2.60589	0.250258	1.35396	-0.446318	0.870482	-0.651374	-0.372521	0.143066	1.66124	0.25226	-0.0958065	2.01195
																										1.0492	1.52665	2.11779	0.358785	0.364299	0.418531	2.09072	0.155364	1.34343	0.0182847	-0.584401	-0.269736	2.77651	0.212197	1.34768	-0.515369	0.878072	-0.639929	-0.408457	0.257893	1.59059	0.536566	-0.0924686	2.8697
																										1.0736	1.65206	2.08546	0.331489	0.441322	0.378861	2.03538	0.131595	1.50254	0.106289	-0.606974	-0.18194	3.02809	0.211603	1.34554	-0.575385	0.925369	-0.582166	-0.42894	0.388662	1.52961	0.88892	-0.0497779	3.68725
																										1.098	1.87824	2.07902	0.323107	0.582534	0.38275	2.00491	0.142702	1.75973	0.25865	-0.605266	-0.0375611	3.3707	0.265426	1.35712	-0.618045	1.02992	-0.456904	-0.415132	0.539987	1.50445	1.29839	0.0511817	4.43407
																										1.1224	2.22182	2.10728	0.347423	0.794477	0.446488	2.00768	0.202393	2.12173	0.481971	-0.572381	0.169173	3.80449	0.391613	1.39712	-0.633378	1.20772	-0.245468	-0.346982	0.719194	1.55043	1.74742	0.232242	5.09113
																										1.1468	2.68216	2.17682	0.419805	1.07641	0.582476	2.05102	0.321366	2.58104	0.777606	-0.502658	0.43884	4.31485	0.606534	1.48326	-0.61023	1.47232	0.0621987	-0.206745	0.933471	1.70428	2.21453	0.512927	5.65227
																										1.1712	3.2379	2.29024	0.554089	1.41674	0.793817	2.13961	0.504973	3.117	1.14056	-0.394205	0.768847	4.87627	0.919869	1.63271	-0.536535	1.83009	0.464022	0.017241	1.18907	1.99336	2.67741	0.903347	6.12009
																										1.1956	3.85113	2.44477	0.760326	1.79562	1.07202	2.27341	0.750977	3.70024	1.55858	-0.250518	1.14767	5.45892	1.32996	1.85787	-0.400228	2.275	0.946323	0.328062	1.48934	2.42637	3.11677	1.39948	6.50414
																										1.22	4.47704	2.63206	1.04191	2.18972	1.39954	2.44635	1.04774	4.29939	2.01167	-0.0792692	1.54969	6.02916	1.82225	2.16261	-0.19137	2.78749	1.48717	0.719785	1.83196	2.98986	3.52063	1.98343	6.81935
																										1.2444	5.0745	2.83965	1.39211	2.57685	1.75408	2.64712	1.37551	4.88576	2.47363	0.110714	1.94201	6.55213	2.37027	2.54116	0.0942503	3.33663	2.0602	1.1789	2.20803	3.65336	3.88419	2.62836	7.079
																										1.2688	5.61323	3.05412	1.79312	2.93848	2.11182	2.8623	1.71085	5.43387	2.9169	0.312217	2.29463	7.00125	2.93913	2.9801	0.452416	3.88423	2.63802	1.68713	2.60303	4.37733	4.20673	3.30581	7.28558
																										1.2932	6.07538	3.26387	2.21908	3.25968	2.45126	3.08031	2.03086	5.92006	3.31854	0.521235	2.58583	7.36354	3.49184	3.46231	0.870735	4.39227	3.19482	2.22476	2.99881	5.11732	4.49074	3.99162	7.42847
																										1.3176	6.45342	3.46037	2.64184	3.52812	2.7572	3.29353	2.3159	6.32336	3.6639	0.736893	2.80486	7.63652	3.99632	3.97045	1.33124	4.83244	3.70807	2.77346	3.37606	5.82946	4.74126	4.6678	7.49455
																										1.342	6.74717	3.63819	3.03681	3.73351	3.0223	3.49797	2.55188	6.63041	3.94752	0.959476	2.94918	7.82606	4.43009	4.48881	1.81384	5.19052	4.16003	3.31815	3.71729	6.47862	4.96379	5.32119	7.48349
																										1.3664	6.96104	3.79432	3.38637	3.87068	3.24577	3.69186	2.73306	6.8422	4.17238	1.18781	3.02072	7.94623	4.78189	5.00403	2.29929	5.46257	4.53874	3.84779	4.01101	7.04305	5.16411	5.94169	7.41196
																										1.3908	7.10236	3.92755	3.68077	3.94267	3.43033	3.87481	2.8631	6.97407	4.34722	1.41807	3.02909	8.013	5.05094	5.50513	2.77068	5.65132	4.83859	4.35496	4.25558	7.51371	5.34892	6.52129	7.30772
																										1.4152	7.18089	4.0382	3.91692	3.95868	3.57893	4.04762	2.9526	7.0459	4.48266	1.64474	2.99248	8.03509	5.24478	5.98316	3.21346	5.76591	5.06162	4.83442	4.45935	7.88867	5.52535	7.05382	7.20194
																										1.4396	7.20861	4.12794	4.09608	3.93016	3.69331	4.21233	3.0148	7.07335	4.58824	1.86243	2.9314	8.01329	5.377	6.43092	3.61665	5.81994	5.21803	5.28106	4.63653	8.16814	5.6994	7.53519	7.12016
																										1.464	7.19915	4.19938	4.22221	3.87007	3.77524	4.37156	3.06226	7.06667	4.67151	2.06761	2.86471	7.94655	5.46378	6.84263	3.97544	5.82877	5.32287	5.68833	4.80081	8.35712	5.87472	7.96357	7.07519
																										1.4884	7.1661	4.25532	4.30109	3.79274	3.82824	4.52736	3.10549	7.03214	4.73832	2.25966	2.80878	7.83627	5.5199	7.21397	4.29079	5.80925	5.39106	6.04871	4.96053	8.46813	6.05286	8.33878	7.06797
																										1.5128	7.12023	4.29802	4.33953	3.71059	3.85787	4.68005	3.15204	6.97427	4.79267	2.44026	2.77474	7.68813	5.55618	7.54254	4.56603	5.77951	5.43449	6.35586	5.11881	8.51588	6.23454	8.66114	7.09368
																										1.5372	7.06729	4.32927	4.34384	3.62931	3.87131	4.82789	3.2058	6.8981	4.83607	2.61073	2.76633	7.5112	5.57987	7.8279	4.80529	5.75647	5.46029	6.60672	5.27716	8.51209	6.41932	8.93126	7.1444
																										1.5616	7.00872	4.35088	4.31833	3.54763	3.87798	4.96774	3.26782	6.80869	4.86883	2.77036	2.78228	7.31347	5.59632	8.07069	5.01424	5.75137	5.47083	6.80211	5.43697	8.46855	6.60311	9.15096	7.20888
																										1.586	6.94455	4.36503	4.26596	3.46069	3.88979	5.09687	3.33735	6.70911	4.8919	2.91746	2.81907	7.10129	5.60968	8.2723	5.19858	5.76536	5.46743	6.94638	5.59703	8.39855	6.77673	9.32479	7.27377
																										1.6104	6.87578	4.37377	4.19015	3.36275	3.91865	5.21434	3.41255	6.60037	4.90638	3.05179	2.87013	6.88367	5.62307	8.43518	5.36052	5.79215	5.45416	7.04636	5.75229	8.31144	6.92837	9.46075	7.32401
																										1.6348	6.80508	4.37808	4.09438	3.2498	3.97181	5.32115	3.49077	6.48431	4.91296	3.17578	2.92714	6.6724	5.63908	8.563	5.49819	5.82626	5.43815	7.1098	5.89681	8.21076	7.0491	9.57002	7.34663
																										1.6592	6.73627	4.37779	3.98055	3.12071	4.04949	5.4194	3.56821	6.36585	4.91357	3.29409	2.98642	6.47801	5.65991	8.66022	5.60931	5.86513	5.42765	7.14447	6.02634	8.09671	7.13842	9.66523	7.33974
																										1.6836	6.67328	4.37264	3.8487	2.97646	4.1461	5.51125	3.64066	6.25062	4.91257	3.41185	3.05197	6.30824	5.68661	8.73132	5.6952	5.90598	5.42991	7.15908	6.1384	7.96702	7.20659	9.75808	7.31514
																										1.708	6.61885	4.36369	3.69864	2.81975	4.25328	5.59838	3.70614	6.14148	4.9151	3.53231	3.12974	6.16886	5.71792	8.78047	5.76064	5.94442	5.44955	7.16474	6.23129	7.8206	7.27201	9.85721	7.29199
																										1.7324	6.57314	4.35354	3.53182	2.65446	4.36293	5.68195	3.76566	6.03791	4.92553	3.65544	3.22046	6.06369	5.75019	8.81135	5.81067	5.97488	5.48795	7.17471	6.30315	7.66172	7.3548	9.96757	7.28611
																										1.7568	6.53424	4.34521	3.35255	2.48579	4.47037	5.76294	3.82212	5.93623	4.94775	3.77896	3.31903	5.99334	5.77894	8.82763	5.8488	5.99224	5.54362	7.2015	6.35267	7.49644	7.46922	10.0917	7.30184
																										1.7812	6.50173	4.34061	3.16851	2.32157	4.57602	5.84214	3.88061	5.82923	4.98557	3.90035	3.41998	5.95444	5.80168	8.83386	5.87688	5.99265	5.61356	7.25307	6.38118	7.32758	7.61805	10.2315	7.33091
																										1.8056	6.48015	4.3398	2.99011	2.17087	4.6837	5.91962	3.9482	5.71087	5.04181	4.01857	3.52075	5.94101	5.82012	8.83578	5.89481	5.97233	5.69425	7.33072	6.39274	7.15602	7.79244	10.3886	7.35407
																										1.83	6.47769	4.34149	2.82777	2.04107	4.79645	5.99404	4.03121	5.58301	5.11717	4.13466	3.62073	5.94579	5.83987	8.83963	5.90208	5.92888	5.78212	7.42948	6.39114	6.98326	7.97831	10.5645	7.34839
																										1.8544	6.50118	4.34428	2.68847	1.9361	4.91398	6.06268	4.13149	5.45372	5.21025	4.25057	3.72145	5.96183	5.86769	8.85088	5.90138	5.86332	5.87476	7.54046	6.37818	6.81386	8.16443	10.7601	7.2995
																										1.8788	6.55261	4.34792	2.5745	1.85582	5.03306	6.12272	4.2444	5.33255	5.31877	4.36739	3.82773	5.98542	5.90846	8.87309	5.899	5.77808	5.97165	7.65419	6.35466	6.65932	8.34698	10.9733	7.20651
																										1.9032	6.62901	4.35367	2.48472	1.79728	5.14943	6.17313	4.36087	5.23009	5.44126	4.48453	3.9462	6.01446	5.9641	8.90653	5.9	5.6737	6.0736	7.7633	6.321	6.53532	8.528	11.1971	7.07807
																										1.9276	6.7233	4.36404	2.41591	1.75692	5.25992	6.21548	4.47245	5.1532	5.57754	4.60069	4.08285	6.04271	6.03457	8.94724	5.90372	5.54853	6.18113	7.86247	6.27686	6.45173	8.71063	11.4193	6.92917
																										1.952	6.82517	4.38228	2.36336	1.73125	5.36406	6.25322	4.57359	5.09631	5.72703	4.71618	4.23806	6.06117	6.11918	8.98811	5.90434	5.40047	6.29246	7.94754	6.22232	6.40762	8.89648	11.6247	6.77898
																										1.9764	6.92415	4.4121	2.32214	1.71526	5.46416	6.29019	4.66096	5.04335	5.8874	4.83442	4.4013	6.06544	6.21677	9.02183	5.89535	5.23065	6.40412	8.0161	6.1597	6.39221	9.08763	11.8	6.64533
																										2.0008	7.01387	4.45737	2.28903	1.70216	5.56425	6.32961	4.73385	4.98135	6.05513	4.96077	4.55479	6.05733	6.32595	9.04313	5.87237	5.04673	6.51499	8.06882	6.09467	6.38734	9.28978	11.9361	6.53938
																										2.0252	7.09395	4.52158	2.26309	1.68766	5.66887	6.37388	4.79472	4.90963	6.2258	5.09988	4.68354	6.0427	6.44677	9.04952	5.83298	4.8592	6.62962	8.10927	6.03576	6.3726	9.5092	12.03	6.46148
																										2.0496	7.16812	4.60686	2.24388	1.67299	5.78139	6.42513	4.84756	4.83682	6.39423	5.25395	4.7822	6.03061	6.58103	9.04196	5.77726	4.6761	6.75843	8.1416	5.99102	6.33124	9.74402	12.0844	6.40092
																										2.074	7.24082	4.71302	2.23026	1.6614	5.90296	6.48624	4.8958	4.77176	6.55609	5.42237	4.85624	6.02966	6.73029	9.02521	5.70847	4.50551	6.91437	8.16884	5.96285	6.25464	9.98126	12.1073	6.34792
																										2.0984	7.31546	4.83709	2.22136	1.65453	6.03256	6.56125	4.94203	4.71805	6.71007	5.60203	4.91641	6.04296	6.89402	9.00677	5.63153	4.35851	7.1072	8.1929	5.94618	6.14453	10.204	12.1106	6.30528
																										2.1228	7.3942	4.97398	2.21764	1.65358	6.16791	6.65369	4.9886	4.67556	6.85924	5.78824	4.97051	6.06913	7.07016	8.99434	5.55173	4.24358	7.33997	8.21496	5.93189	6.01062	10.4001	12.1062	6.28108
																										2.1472	7.47742	5.1177	2.21985	1.66145	6.30699	6.76352	5.03732	4.64485	7.01037	5.97621	5.02151	6.10687	7.25638	8.99305	5.47461	4.16092	7.6099	8.23555	5.91153	5.86564	10.5653	12.1041	6.27464
																										2.1716	7.56408	5.26262	2.22765	1.68112	6.44924	6.88578	5.08973	4.62852	7.17165	6.16215	5.06909	6.15421	7.45076	9.00456	5.40436	4.10569	7.90917	8.25563	5.87893	5.72335	10.7014	12.1111	6.27748
																										2.196	7.65344	5.40415	2.23929	1.71349	6.59538	7.01251	5.14777	4.62713	7.3508	6.34295	5.10842	6.20452	7.65189	9.02819	5.34218	4.0722	8.22488	8.27813	5.82969	5.59866	10.8128	12.1309	6.28563
																										2.2204	7.74712	5.53875	2.25235	1.75678	6.74675	7.1361	5.21364	4.63439	7.55308	6.51568	5.13278	6.24952	7.85885	9.06252	5.28736	4.05261	8.54078	8.30844	5.76224	5.50444	10.9045	12.1633	6.30579
																										2.2448	7.84983	5.66375	2.26472	1.80635	6.90463	7.25151	5.28902	4.63937	7.77884	6.67795	5.13986	6.28811	8.0718	9.10646	5.23975	4.03598	8.84018	8.35292	5.6803	5.44528	10.9852	12.2058	6.35108
																										2.2692	7.96671	5.77766	2.27489	1.85554	7.06918	7.35649	5.37457	4.63304	8.02284	6.82824	5.13203	6.32789	8.29208	9.16039	5.20016	4.01199	9.10696	8.41697	5.59277	5.41412	11.0652	12.2543	6.42909
																										2.2936	8.10014	5.8805	2.28151	1.89688	7.23853	7.45025	5.46929	4.61179	8.27675	6.96595	5.11261	6.37907	8.52001	9.22656	5.16811	3.97415	9.32571	8.50406	5.50991	5.39764	11.1519	12.3039	6.52799
																										2.318	8.24947	5.97349	2.28246	1.92344	7.40933	7.53254	5.5699	4.57741	8.53332	7.0916	5.08329	6.4496	8.75179	9.30748	5.13961	3.91932	9.48529	8.61566	5.43913	5.38729	11.2447	12.3489	6.61601
																										2.3424	8.41269	6.05866	2.27474	1.93146	7.57881	7.60417	5.67056	4.53588	8.78885	7.20673	5.04176	6.54169	8.97956	9.40335	5.10848	3.84837	9.58387	8.75155	5.38253	5.38355	11.3352	12.3825	6.65801
																										2.3668	8.58794	6.13846	2.25668	1.92252	7.74615	7.66809	5.76371	4.49568	9.04168	7.31334	4.98272	6.64879	9.19436	9.5106	5.0706	3.76717	9.62932	8.90984	5.33664	5.39001	11.4099	12.398	6.6333
																										2.3912	8.77352	6.21526	2.23052	1.90154	7.91238	7.7291	5.84341	4.4648	9.28893	7.41379	4.90347	6.75595	9.38826	9.62243	5.0254	3.68142	9.63458	9.08712	5.29591	5.40742	11.4553	12.3904	6.54435
																										2.4156	8.96703	6.29082	2.20272	1.87271	8.07942	7.79201	5.90805	4.44852	9.52562	7.51128	4.8068	6.84529	9.55509	9.73065	4.97354	3.59141	9.61256	9.27882	5.25851	5.43579	11.4631	12.3584	6.41464
																										2.44	9.1647	6.36605	2.18113	1.83966	8.2495	7.85977	5.95973	4.44899	9.74621	7.60994	4.69782	6.90506	9.69144	9.82778	4.91534	3.4957	9.57268	9.47949	5.2286	5.4792	11.4324	12.3047	6.2759
																										2.4644	9.36239	6.44078	2.17096	1.8084	8.42557	7.93277	6.0029	4.46479	9.9453	7.7151	4.58035	6.93467	9.79674	9.90857	4.85089	3.39796	9.52057	9.68279	5.21332	5.54424	11.3681	12.2344	6.15276
																										2.4888	9.55709	6.51383	2.1734	1.7867	8.61093	8.00961	6.04369	4.49151	10.1178	7.83337	4.45819	6.93938	9.87237	9.97063	4.78126	3.30532	9.46014	9.88169	5.21746	5.63256	11.2777	12.152	6.0544
																										2.5132	9.74766	6.58375	2.18703	1.77963	8.80817	8.08848	6.0883	4.5248	10.2596	7.97056	4.33695	6.92268	9.92168	10.0145	4.7092	3.22202	9.39388	10.0689	5.23988	5.73456	11.1705	12.0602	5.97208
																										2.5376	9.93427	6.64995	2.20935	1.78524	9.01825	8.1683	6.14056	4.56338	10.368	8.12864	4.2192	6.88416	9.95034	10.0423	4.63664	3.14971	9.32091	10.2377	5.27331	5.83136	11.0546	11.9592	5.88506
																										2.562	10.117	6.71309	2.23737	1.79662	9.23991	8.24875	6.20054	4.60792	10.4419	8.30456	4.09718	6.81796	9.96592	10.0566	4.56271	3.09189	9.23826	10.383	5.30781	5.90705	10.9351	11.847	5.77655
																										2.5864	10.2959	6.77421	2.26759	1.80824	9.46966	8.32972	6.26442	4.65773	10.4822	8.4911	3.9536	6.71447	9.97727	10.0597	4.48648	3.05161	9.14525	10.5022	5.3357	5.95998	10.8136	11.7217	5.64286
																										2.6108	10.4716	6.83343	2.29608	1.81834	9.70273	8.41126	6.32575	4.70858	10.4914	8.67873	3.77269	6.57129	9.99329	10.0547	4.40962	3.02336	9.04477	10.5954	5.35442	5.99976	10.6896	11.583	5.4883
																										2.6352	10.6465	6.88924	2.31997	1.82779	9.93412	8.49374	6.37855	4.75434	10.4747	8.85764	3.55156	6.40114	10.0195	10.0456	4.33441	2.99299	8.94074	10.6646	5.36587	6.03706	10.5609	11.4328	5.31904
																										2.6596	10.8238	6.93914	2.33903	1.83879	10.1586	8.57816	6.42053	4.79277	10.4389	9.01949	3.30287	6.22595	10.0546	10.0366	4.26136	2.94956	8.83534	10.7127	5.3738	6.07858	10.4242	11.2742	5.13981
																										2.684	11.0073	6.98079	2.35551	1.85231	10.3712	8.66625	6.45318	4.82841	10.3917	9.15806	3.04928	6.06506	10.0907	10.0315	4.19008	2.89403	8.72783	10.7431	5.3811	6.1259	10.2773	11.1087	4.95368
																										2.7084	11.1987	7.0127	2.37315	1.86693	10.5686	8.7598	6.47895	4.86779	10.3394	9.2693	2.81461	5.92833	10.1183	10.0331	4.12167	2.83485	8.61525	10.759	5.38804	6.17455	10.1221	10.9355	4.7669
																										2.7328	11.3967	7.03495	2.3963	1.8798	10.7494	8.85916	6.49879	4.91263	10.2863	9.35142	2.61486	5.81484	10.1307	10.0425	4.0594	2.77958	8.49499	10.763	5.39244	6.21807	9.96438	10.7532	4.58862
																										2.7572	11.5981	7.04941	2.4285	1.88929	10.9131	8.96218	6.5118	4.95918	10.2333	9.40479	2.45345	5.7163	10.125	10.0589	4.00674	2.73114	8.36817	10.7562	5.39114	6.25454	9.81018	10.5608	4.42311
																										2.7816	11.7989	7.05855	2.47061	1.89674	11.0583	9.0645	6.51616	5.0028	10.1783	9.43127	2.32575	5.62443	10.1007	10.0798	3.96474	2.68805	8.24058	10.7392	5.38166	6.28536	9.66177	10.3603	4.26694
																										2.806	11.9946	7.0642	2.52054	1.90449	11.1827	9.16098	6.50958	5.04123	10.1189	9.43404	2.227	5.53622	10.0565	10.1017	3.93159	2.64643	8.11996	10.7129	5.36324	6.30913	9.51768	10.1572	4.1104
																										2.8304	12.1801	7.06795	2.57468	1.91445	11.2845	9.24757	6.49096	5.07352	10.0545	9.41929	2.15432	5.45331	9.98971	10.1212	3.90412	2.60269	8.01133	10.679	5.33668	6.32146	9.37437	9.95844	3.93975
																										2.8548	12.3503	7.07188	2.62922	1.9299	11.3637	9.32256	6.46336	5.09829	9.9881	9.39705	2.10301	5.37657	9.89809	10.1355	3.87865	2.55737	7.91361	10.6397	5.30262	6.31671	9.22831	9.76908	3.74517
																										2.8792	12.5015	7.07793	2.68165	1.95532	11.4212	9.38693	6.43321	5.11406	9.92589	9.37829	2.06344	5.30045	9.78223	10.1428	3.85075	2.51974	7.82139	10.5988	5.26044	6.28528	9.07837	9.59086	3.52706
																										2.9036	12.63	7.08669	2.73213	1.9943	11.4587	9.44352	6.40558	5.11981	9.87302	9.37131	2.02356	5.21392	9.64723	10.1429	3.81567	2.50582	7.72926	10.5602	5.20972	6.21536	8.92631	9.4226	3.29363
																										2.928	12.7313	7.09742	2.78213	2.049	11.4776	9.49523	6.38134	5.11539	9.82935	9.38105	1.97379	5.10709	9.50292	10.1361	3.77091	2.52526	7.63358	10.526	5.1514	6.1013	8.77563	9.26178	3.05637
																										2.9524	12.8014	7.10918	2.83046	2.1202	11.4799	9.54341	6.3582	5.1032	9.78841	9.41019	1.90867	4.9752	9.36144	10.1224	3.71856	2.57078	7.53216	10.4945	5.08648	5.94853	8.63018	9.10695	2.82948
																										2.9768	12.8384	7.12193	2.8723	2.2072	11.4678	9.58748	6.33277	5.08954	9.74056	9.45901	1.82742	4.81972	9.23325	10.1018	3.6639	2.62254	7.424	10.4621	5.0143	5.7712	8.49241	8.95911	2.62817
																										3.0012	12.844	7.1366	2.90329	2.30742	11.4421	9.62557	6.30188	5.08377	9.67755	9.52429	1.73481	4.64998	9.12418	10.075	3.61181	2.65973	7.30908	10.4248	4.93338	5.58538	8.36236	8.82075	2.46342
																										3.0256	12.8231	7.15525	2.9222	2.41502	11.4025	9.65514	6.26365	5.0941	9.59546	9.59914	1.63975	4.48095	9.03523	10.0428	3.56446	2.66861	7.18707	10.3796	4.84426	5.40205	8.23855	8.6944	2.33795
																										3.05	12.784	7.18121	2.92958	2.52096	11.3488	9.67275	6.2177	5.12245	9.49416	9.67471	1.5504	4.32547	8.96399	10.006	3.5217	2.64534	7.05683	10.3237	4.75085	5.22543	8.11936	8.5821	2.24522
																										3.0744	12.737	7.21805	2.92657	2.61624	11.2806	9.67374	6.16545	5.16471	9.37542	9.74333	1.46986	4.18748	8.90595	9.96527	3.48327	2.59613	6.91783	10.2541	4.65869	5.05876	8.00346	8.48459	2.17253
																										3.0988	12.6931	7.26791	2.91469	2.69638	11.198	9.65329	6.11061	5.21558	9.24169	9.80085	1.39864	4.06342	8.85488	9.92184	3.44938	2.53321	6.77134	10.1678	4.57235	4.91086	7.88752	8.4004	2.10462
																										3.1232	12.6609	7.33088	2.89517	2.76304	11.1024	9.6089	6.05756	5.27041	9.09581	9.84672	1.33812	3.94986	8.80357	9.87772	3.41837	2.46685	6.61985	10.0646	4.4958	4.79402	7.76438	8.3263	2.02359
																										3.1476	12.6445	7.40605	2.86799	2.82168	10.9963	9.54258	6.00833	5.32434	8.94005	9.88292	1.28875	3.84735	8.74521	9.83487	3.38517	2.40241	6.46651	9.94772	4.43363	4.71381	7.62664	8.25831	1.91495
																										3.172	12.6416	7.49265	2.83148	2.87919	10.8821	9.46102	5.96089	5.37329	8.77521	9.91296	1.24994	3.75783	8.67483	9.79421	3.34346	2.34167	6.3156	9.8232	4.38928	4.66175	7.47205	8.19161	1.77862
																										3.1964	12.6448	7.5899	2.7832	2.94259	10.761	9.37321	5.91087	5.41331	8.60081	9.94071	1.22313	3.68194	8.58976	9.7546	3.28885	2.28156	6.17207	9.69794	4.36146	4.61877	7.30598	8.12032	1.63056
																										3.2208	12.6458	7.69568	2.7219	3.01674	10.6331	9.28708	5.85596	5.43763	8.4164	9.96875	1.2122	3.61926	8.48898	9.7132	3.22009	2.21524	6.03946	9.57802	4.34322	4.56682	7.14048	8.03839	1.49437
																										3.2452	12.6378	7.80603	2.64918	3.10239	10.4981	9.20692	5.79833	5.43834	8.2229	9.99755	1.22218	3.56989	8.37313	9.66686	3.13854	2.13912	5.91832	9.4673	4.32499	4.49895	6.98878	7.94118	1.38843
																										3.2696	12.6158	7.91597	2.56888	3.19775	10.357	9.13292	5.74209	5.41087	8.02308	10.0268	1.25866	3.53454	8.24505	9.61324	3.04663	2.0571	5.8066	9.36646	4.29895	4.41866	6.85741	7.82675	1.31504
																										3.294	12.5758	8.02077	2.48515	3.30029	10.211	9.06297	5.6887	5.35493	7.82135	10.0564	1.32458	3.51172	8.10893	9.55138	2.94639	1.97691	5.70148	9.27332	4.26075	4.33171	6.74336	7.69637	1.26213
																										3.3184	12.5144	8.11663	2.40194	3.40592	10.0601	8.99516	5.63496	5.27664	7.62303	10.086	1.41348	3.49541	7.96851	9.48187	2.83983	1.90452	5.5997	9.18448	4.20809	4.24089	6.638	7.5536	1.21629
																										3.3428	12.4293	8.20033	2.32333	3.51045	9.90315	8.92892	5.57608	5.19006	7.43268	10.1136	1.50654	3.47566	7.82683	9.40625	2.72948	1.84278	5.49671	9.09677	4.1395	4.146	6.53114	7.40279	1.17376
																										3.3672	12.3198	8.26878	2.25234	3.61303	9.73874	8.86411	5.51013	5.10879	7.25199	10.1366	1.58001	3.4428	7.68754	9.3258	2.61757	1.79212	5.38708	9.00791	4.0553	4.04391	6.41236	7.24807	1.14003
																										3.3916	12.1865	8.31938	2.19004	3.71471	9.56623	8.79939	5.43841	5.0383	7.07927	10.1521	1.61835	3.39247	7.5542	9.24098	2.50615	1.75187	5.26717	8.91682	3.95924	3.92809	6.27261	7.09263	1.11933
																										3.416	12.0325	8.35088	2.13648	3.81426	9.38648	8.73187	5.36252	4.9775	6.91202	10.1585	1.62051	3.32587	7.42823	9.15184	2.39832	1.72278	5.1375	8.82383	3.85855	3.79161	6.10759	6.93827	1.10691
																										3.4404	11.8618	8.36408	2.09148	3.90606	9.20247	8.65866	5.28335	4.91963	6.75021	10.1554	1.59469	3.24689	7.30909	9.05851	2.29832	1.70605	5.00221	8.73038	3.76123	3.63448	5.91988	6.78543	1.09209
																										3.4648	11.6788	8.36153	2.05425	3.98158	9.01877	8.57883	5.20212	4.85212	6.59654	10.1433	1.55098	3.16213	7.1963	8.96101	2.21037	1.69985	4.86622	8.63805	3.67158	3.46769	5.71655	6.63394	1.06427
																										3.4892	11.4887	8.34639	2.02337	4.03493	8.84007	8.49362	5.12128	4.76437	6.45324	10.1218	1.49799	3.08066	7.08998	8.85882	2.1372	1.69966	4.73235	8.54743	3.58834	3.3077	5.50432	6.48408	1.01464
																										3.5136	11.2977	8.32135	1.99691	4.06671	8.66959	8.4052	5.04355	4.658	6.31973	10.088	1.44097	3.00915	6.99	8.75141	2.07921	1.69882	4.60099	8.45763	3.50764	3.16784	5.28789	6.33679	0.937481
																										3.538	11.1115	8.28838	1.97246	4.08202	8.50827	8.31534	4.96982	4.54629	6.19334	10.0376	1.37886	2.94858	6.89594	8.63917	2.03511	1.68781	4.47206	8.36739	3.42645	3.05472	5.07188	6.19265	0.835026
																										3.5624	10.9344	8.24939	1.94803	4.08799	8.35506	8.22422	4.89822	4.44267	6.07149	9.96728	1.30197	2.89753	6.80778	8.52371	2.00314	1.65756	4.34665	8.27685	3.34315	2.96944	4.86262	6.05144	0.720867
																										3.5868	10.7675	8.20675	1.92278	4.09192	8.20734	8.13023	4.82501	4.35301	5.95328	9.87597	1.19605	2.85549	6.72587	8.40751	1.98112	1.60298	4.22668	8.18795	3.25683	2.90945	4.66667	5.91261	0.613835
																										3.6112	10.6092	8.16267	1.89644	4.09919	8.06196	8.03154	4.74613	4.27637	5.83987	9.76525	1.05354	2.82213	6.64983	8.29342	1.96606	1.52189	4.1135	8.10327	3.16734	2.86952	4.4881	5.77575	0.526869
																										3.6356	10.4561	8.11827	1.86791	4.11233	7.91713	7.92772	4.65861	4.20665	5.73333	9.63796	0.880897	2.7969	6.57776	8.18409	1.95468	1.41372	4.00767	8.02554	3.07442	2.84382	4.32869	5.64086	0.463939
																										3.66	10.3048	8.07343	1.83468	4.13024	7.7735	7.81996	4.56114	4.13447	5.63481	9.49679	0.695079	2.77893	6.50632	8.08189	1.94508	1.28172	3.90941	7.9577	2.97691	2.82897	4.18996	5.50786	0.424607
																										3.6844	10.152	8.02773	1.7943	4.14847	7.63343	7.70985	4.45379	4.05255	5.54321	9.34415	0.514461	2.76541	6.43175	7.98941	1.93783	1.13468	3.81827	7.90173	2.87507	2.8238	4.07324	5.37618	0.405319
																										3.7088	9.99425	7.98158	1.7458	4.16127	7.49859	7.59864	4.33683	3.961	5.45451	9.18269	0.351754	2.75175	6.35167	7.90956	1.93492	0.985423	3.7324	7.8575	2.77169	2.82532	3.97679	5.24505	0.398541
																										3.7332	9.82825	7.93667	1.68948	4.16285	7.36831	7.48795	4.20999	3.86649	5.36255	9.01537	0.213658	2.73421	6.2659	7.84403	1.93702	0.848609	3.64836	7.82274	2.66934	2.82583	3.89325	5.11448	0.399212
																										3.7576	9.65126	7.89544	1.62697	4.14944	7.23958	7.38055	4.07357	3.77593	5.26145	8.84512	0.102846	2.71222	6.17559	7.79113	1.94228	0.740279	3.56252	7.79365	2.5689	2.81492	3.81121	4.98598	0.411367
																										3.782	9.46198	7.85959	1.56203	4.1224	7.10781	7.27959	3.93047	3.69358	5.14797	8.67492	0.0153924	2.68843	6.08257	7.74519	1.94758	0.677293	3.47354	7.76564	2.47148	2.78521	3.72096	4.86205	0.441854
																										3.8064	9.26145	7.82889	1.50017	4.08759	6.9687	7.18692	3.78682	3.62029	5.02219	8.50782	-0.059333	2.66721	5.98972	7.69876	1.94998	0.671145	3.38298	7.73456	2.37896	2.7375	3.61911	4.74464	0.487675
																										3.8308	9.05294	7.80148	1.44619	4.05052	6.82045	7.1019	3.65068	3.55013	4.88618	8.34634	-0.129874	2.65271	5.90073	7.64631	1.94708	0.720158	3.29357	7.69715	2.29295	2.6801	3.50794	4.63379	0.532501
																										3.8552	8.84088	7.77523	1.40263	4.01249	6.66459	7.02165	3.52856	3.4722	4.74221	8.19175	-0.196893	2.64651	5.81916	7.58578	1.93673	0.812246	3.20749	7.65076	2.21521	2.62266	3.39213	4.52786	0.556937
																										3.8796	8.62934	7.74863	1.37027	3.97097	6.50567	6.94298	3.42245	3.38079	4.59176	8.04348	-0.258593	2.64462	5.74776	7.51732	1.91809	0.932623	3.1254	7.59336	2.1487	2.57089	3.27753	4.42528	0.552892
																										3.904	8.42026	7.72041	1.34876	3.9241	6.34988	6.86413	3.33091	3.28202	4.43599	7.89933	-0.317163	2.63727	5.68809	7.44127	1.89362	1.06565	3.04725	7.52427	2.09715	2.52639	3.17048	4.32537	0.526867
																										3.9284	8.21268	7.68882	1.33615	3.87377	6.20216	6.78526	3.25243	3.18944	4.27701	7.75667	-0.377507	2.61496	5.64007	7.35755	1.86879	1.19752	2.97356	7.44455	2.0636	2.48779	3.07579	4.22742	0.489462
																										3.9528	8.00412	7.65152	1.32856	3.82377	6.06383	6.70773	3.18624	3.11408	4.11848	7.61336	-0.443153	2.57555	5.60214	7.26603	1.84904	1.32132	2.90579	7.3568	2.04883	2.45107	2.99405	4.12998	0.445639
																										3.9772	7.79319	7.60647	1.32034	3.7766	5.93285	6.63304	3.13082	3.05859	3.96492	7.46762	-0.51586	2.5233	5.57163	7.16725	1.83705	1.4348	2.84566	7.26511	2.05082	2.40916	2.9207	4.03186	0.395838
																										4.0016	7.5814	7.55292	1.30511	3.73417	5.80553	6.56181	3.08388	3.01831	3.82037	7.31816	-0.595274	2.46217	5.54522	7.06268	1.83066	1.53517	2.79321	7.17437	2.06522	2.3524	2.84858	3.93344	0.342276
																										4.026	7.37331	7.49189	1.27809	3.69922	5.67868	6.49335	3.04337	2.9859	3.68667	7.16454	-0.67548	2.39385	5.51996	6.95426	1.82272	1.62087	2.74472	7.08779	2.08646	2.27332	2.77184	3.83646	0.289602
																										4.0504	7.175	7.42579	1.23848	3.67268	5.55135	6.42572	3.00735	2.95682	3.56275	7.00718	-0.746004	2.31997	5.49393	6.84391	1.80635	1.69496	2.69411	7.00506	2.10901	2.17268	2.68864	3.74254	0.238957
																										4.0748	6.99165	7.35739	1.18951	3.65105	5.42475	6.35634	2.97427	2.93136	3.44628	6.8475	-0.799271	2.24325	5.46532	6.73274	1.78155	1.76266	2.63664	6.92351	2.12765	2.0597	2.60115	3.6521	0.185534
																										4.0992	6.82566	7.28892	1.13614	3.62831	5.30043	6.28302	2.94437	2.912	3.33556	6.68812	-0.835371	2.16703	5.43178	6.62062	1.75418	1.82672	2.57132	6.84089	2.13844	1.94854	2.51332	3.56463	0.123051
																										4.1236	6.67628	7.22159	1.08242	3.59898	5.17842	6.20436	2.91929	2.89981	3.22967	6.53214	-0.858347	2.09436	5.39102	6.50653	1.72878	1.88728	2.50123	6.75711	2.13953	1.85378	2.42868	3.47983	0.0491692
																										4.148	6.54024	7.15586	1.03046	3.5596	5.05669	6.11959	2.89993	2.89189	3.1282	6.38171	-0.86852	2.02697	5.34166	6.38963	1.70481	1.94421	2.43284	6.67368	2.13012	1.78296	2.34914	3.39836	-0.0339164
																										4.1724	6.41252	7.09184	0.981164	3.50968	4.93223	6.02875	2.88469	2.8815	3.03134	6.23764	-0.861884	1.96608	5.28359	6.27029	1.67856	1.99648	2.37325	6.59188	2.10996	1.73105	2.27625	3.3216	-0.123206
																										4.1968	6.28725	7.02972	0.935215	3.45194	4.80327	5.93334	2.86864	2.86073	2.93977	6.10001	-0.837336	1.91413	5.21771	6.15012	1.6463	2.04054	2.32592	6.51131	2.07966	1.68588	2.21323	3.25077	-0.215281
																										4.2212	6.15933	6.96951	0.892783	3.39006	4.67054	5.83638	2.8452	2.82474	2.8546	5.9683	-0.799896	1.87443	5.14529	6.03168	1.60587	2.07142	2.28905	6.43048	2.04113	1.64133	2.16408	3.18589	-0.303012
																										4.2456	6.02644	6.91059	0.852818	3.32614	4.53662	5.74113	2.80992	2.77705	2.77684	5.8414	-0.756248	1.85015	5.06707	5.91866	1.55654	2.08654	2.25795	6.34834	1.99777	1.60135	2.13016	3.12525	-0.376623
																										4.27	5.88989	6.85181	0.813343	3.26166	4.40444	5.64985	2.76265	2.72992	2.70686	5.71881	-0.7112	1.84252	4.98264	5.81554	1.49899	2.08939	2.22787	6.2642	1.95239	1.57056	2.10815	3.06602	-0.428502
																										4.2944	5.75343	6.79241	0.772695	3.19989	4.27696	5.56334	2.70757	2.69565	2.64504	5.60161	-0.667932	1.84778	4.89109	5.72604	1.43581	2.08841	2.19496	6.17635	1.90522	1.54916	2.09093	3.00546	-0.455356
																										4.3188	5.62098	6.73289	0.730315	3.14543	4.15756	5.48089	2.6517	2.67745	2.59175	5.49201	-0.626897	1.85746	4.79213	5.6518	1.37103	2.091	2.15669	6.08138	1.8566	1.53747	2.07093	2.94208	-0.456186
																										4.3432	5.49499	6.67501	0.687173	3.10185	4.04918	5.40137	2.6013	2.6699	2.54608	5.39212	-0.585964	1.86336	4.68605	5.59189	1.30808	2.10083	2.11263	5.97569	1.80998	1.53753	2.0439	2.8761	-0.430663
																										4.3676	5.37606	6.6209	0.645845	3.0693	3.95263	5.32486	2.55761	2.66544	2.50547	5.30314	-0.546057	1.86221	4.5735	5.54318	1.24878	2.11808	2.06417	5.85791	1.7687	1.5521	2.01073	2.80935	-0.384417
																										4.392	5.26304	6.57213	0.609476	3.0433	3.86614	5.25285	2.51613	2.65936	2.46752	5.22483	-0.51243	1.85656	4.45544	5.50103	1.1949	2.13743	2.01302	5.73058	1.73198	1.58664	1.97497	2.74423	-0.333714
																										4.4164	5.15326	6.5292	0.580619	3.01754	3.78609	5.18699	2.47026	2.65144	2.43154	5.15528	-0.486349	1.85337	4.33331	5.46011	1.14856	2.14992	1.96163	5.59944	1.697	1.64655	1.93887	2.68255	-0.296884
																										4.4408	5.04347	6.49171	0.560881	2.98703	3.70771	5.12798	2.41627	2.64366	2.39792	5.09166	-0.460952	1.8586	4.21015	5.4153	1.10942	2.15022	1.91464	5.47142	1.66267	1.72973	1.90274	2.62537	-0.283384
																										4.4652	4.93166	6.45872	0.550595	2.94674	3.62656	5.07536	2.3554	2.6357	2.36634	5.0313	-0.426625	1.87022	4.09127	5.36276	1.07341	2.13938	1.87796	5.35239	1.62966	1.82654	1.86677	2.57321	-0.296426
																										4.4896	4.81805	6.42903	0.548718	2.89176	3.54042	5.02802	2.29204	2.62511	2.3354	4.97258	-0.375483	1.87893	3.98202	5.3003	1.03518	2.12169	1.85556	5.24531	1.59799	1.92851	1.83164	2.52618	-0.340133
																										4.514	4.70483	6.40144	0.553048	2.82189	3.44946	4.98518	2.23029	2.61178	2.30349	4.91526	-0.303875	1.87602	3.88526	5.22759	0.991723	2.10324	1.84768	5.15011	1.56539	2.03346	1.79741	2.48402	-0.415669
																										4.5384	4.59539	6.37453	0.559692	2.74413	3.35476	4.9464	2.17265	2.59886	2.26935	4.86038	-0.217156	1.8587	3.80139	5.14658	0.944507	2.08923	1.85126	5.06558	1.52922	2.13967	1.76274	2.44571	-0.512807
																										4.5628	4.49377	6.34663	0.56313	2.67066	3.25741	4.91008	2.12072	2.58965	2.23251	4.80945	-0.130187	1.8294	3.72923	5.06142	0.89834	2.07848	1.8611	4.99075	1.48966	2.2396	1.72561	2.40948	-0.612799
																										4.5872	4.40319	6.31644	0.55842	2.61327	3.15872	4.87299	2.07459	2.58489	2.19348	4.7631	-0.0583878	1.79184	3.66694	4.9772	0.85818	2.06296	1.87142	4.92443	1.44956	2.32207	1.68507	2.37362	-0.699377
																										4.6116	4.32373	6.2835	0.543267	2.57772	3.06005	4.83191	2.03141	2.57985	2.15332	4.72008	-0.00696457	1.7503	3.61311	4.89789	0.827202	2.03198	1.87693	4.86463	1.411	2.37695	1.64256	2.33722	-0.764774
																										4.636	4.2514	6.24803	0.518245	2.56223	2.96223	4.78535	1.98745	2.56361	2.11281	4.67803	0.031002	1.71067	3.56659	4.8249	0.806201	1.97607	1.87425	4.80911	1.37356	2.39698	1.60167	2.29983	-0.809171
																										4.6604	4.17982	6.21043	0.486281	2.56058	2.86558	4.73368	1.94155	2.52529	2.07226	4.63521	0.0650293	1.67776	3.52544	4.75716	0.793542	1.89065	1.86404	4.75622	1.33632	2.3792	1.56558	2.26051	-0.835326
																										4.6848	4.10291	6.1711	0.451496	2.56703	2.77075	4.67846	1.89577	2.46217	2.03181	4.59105	0.0954004	1.65228	3.48712	4.69248	0.785865	1.77959	1.85067	4.70535	1.29924	2.32762	1.53562	2.21722	-0.842056
																										4.7092	4.01726	6.13061	0.417394	2.57909	2.67927	4.62207	1.85387	2.3806	1.99068	4.54554	0.111181	1.63105	3.44928	4.62882	0.779464	1.65673	1.83944	4.65692	1.26297	2.25368	1.51215	2.16741	-0.826311
																										4.7336	3.92324	6.08987	0.386076	2.5961	2.59302	4.56721	1.81997	2.29148	1.94677	4.49823	0.0998218	1.60717	3.41	4.56501	0.771372	1.54158	1.83396	4.61193	1.22965	2.17104	1.49419	2.10949	-0.792134
																										4.758	3.82486	6.04966	0.358624	2.61609	2.51337	4.51613	1.79693	2.20489	1.89796	4.4476	0.0570719	1.57067	3.36894	4.50068	0.759288	1.45155	1.83422	4.57068	1.20372	2.08991	1.47741	2.04404	-0.75436
																										4.7824	3.72871	6.00961	0.335224	2.63362	2.44068	4.46996	1.78364	2.12473	1.84383	4.39132	-0.0138241	1.51424	3.32889	4.43619	0.741625	1.39648	1.83575	4.53128	1.1897	2.01475	1.45498	1.97378	-0.732738
																										4.8068	3.64189	5.96789	0.314924	2.6424	2.37404	4.42903	1.77441	2.04912	1.78638	4.32744	-0.107564	1.43932	3.29515	4.3725	0.719515	1.37616	1.83107	4.48919	1.18833	1.94429	1.42238	1.9024	-0.743917
																										4.8312	3.56971	5.92259	0.29592	2.64202	2.31177	4.39361	1.76169	1.97933	1.72917	4.25571	-0.215151	1.35506	3.27253	4.31099	0.698804	1.37988	1.81376	4.4384	1.1959	1.87562	1.38075	1.83314	-0.797281
																										4.8556	3.51383	5.87359	0.27664	2.63945	2.25292	4.36364	1.73923	1.92388	1.67584	4.17802	-0.320959	1.27458	3.26258	4.25295	0.687638	1.39031	1.78234	4.37355	1.20719	1.8111	1.3336	1.76726	-0.893318
																										4.88	3.47135	5.82298	0.257145	2.6413	2.19821	4.33795	1.70298	1.89006	1.62893	4.09733	-0.408279	1.21249	3.26351	4.1987	0.691248	1.39186	1.74039	4.29151	1.21694	1.76145	1.28251	1.70366	-1.02576
																										4.9044	3.43566	5.77391	0.23937	2.64679	2.14902	4.3145	1.65037	1.87585	1.58959	4.01632	-0.466333	1.17914	3.27201	4.14697	0.709638	1.37877	1.69313	4.19206	1.22075	1.7381	1.22696	1.63998	-1.18456
																										4.9288	3.39854	5.7287	0.225155	2.64906	2.10559	4.2913	1.58091	1.8735	1.55771	3.93738	-0.492122	1.17285	3.28432	4.09534	0.738362	1.35527	1.64376	4.07762	1.21843	1.7414	1.16486	1.57441	-1.35519
																										4.9532	3.35254	5.68781	0.214128	2.64216	2.06666	4.26712	1.49811	1.87943	1.53221	3.86231	-0.491183	1.17966	3.29665	4.04107	0.770145	1.32877	1.59299	3.95206	1.21414	1.76016	1.09248	1.50661	-1.51893
																										4.9776	3.29324	5.65006	0.203918	2.62564	2.03067	4.24109	1.40891	1.89762	1.51081	3.79123	-0.475946	1.18281	3.30591	3.98187	0.798097	1.30382	1.54119	3.82006	1.21092	1.78214	1.00669	1.43705	-1.65677
																										5.002	3.22068	5.6138	0.192092	2.60251	1.99606	4.21187	1.32027	1.93388	1.48979	3.72249	-0.460876	1.17371	3.31037	3.9165	0.819278	1.28	1.48968	3.68706	1.20743	1.80153	0.908112	1.36611	-1.75423
																										5.0264	3.13879	5.57786	0.177337	2.57507	1.96086	4.17762	1.23693	1.98831	1.46529	3.65452	-0.45979	1.15493	3.30908	3.84458	0.833942	1.25387	1.44044	3.55829	1.20035	1.81764	0.802646	1.29376	-1.80689
																										5.0508	3.05259	5.54172	0.159078	2.54369	1.92309	4.1366	1.16183	2.05262	1.43509	3.58775	-0.483195	1.13502	3.30111	3.76583	0.841868	1.2225	1.39544	3.4369	1.18713	1.82811	0.701518	1.21969	-1.8242
[truncated: 1 more columns]
