# Supplementary material for: Learning of probabilistic punishment as a model of anxiety produces changes in action but not punisher encoding in the dmPFC and VTA
Source: eLife. 2022 Sep 14;11:e78912. doi: 10.7554/eLife.78912 (PMC9525102; doi:10.7554/eLife.78912)
Supplement: Figure 7—source data 1. [file elife-78912-fig7-data1.xlsx]

## Sheet: Figure 7A
					Cue (dmpfc)																				Action + footshock (dmpfc)
Session	Saline	Saline	Saline	Saline	Saline	Saline	Saline	Diazepam	Diazepam	Diazepam	Diazepam	Diazepam	Diazepam	Diazepam				Session	Saline	Saline	Saline	Saline	Saline	Saline	Saline	Diazepam	Diazepam	Diazepam	Diazepam	Diazepam	Diazepam	Diazepam
Subject	256	252	283	251	318	320	321	256	318	320	321	251	252	283				Subject	S256	S252	S283	S251	S318	S320	S321	S256	S318	S320	S321	S252	S251	S283
Peri-cue time - sec																		Peri-action time - sec
-1.5128	1.37994	1.0469	0.140071	0.691457	1.72404	-0.52033	-0.49312	0.925241	-0.04126	0.123701	-0.06168	-0.31749	-0.89098	-0.84782				-2.0496	-0.488083	-0.387961	1.0078	0.372414	-0.21016	-0.732084	-0.768767	-0.389667	-0.0197902	-0.912589	-0.228734	0.209071	-0.555379	0.0191173
-1.4884	1.53002	1.03754	0.183736	0.808734	2.00827	-0.54952	-0.57841	1.04894	-0.01315	0.083075	-0.08913	-0.34891	-0.84526	-0.81703				-2.0252	-0.5799	-0.322705	1.11908	0.37647	-0.166643	-0.74964	-0.736752	-0.423873	-0.0664844	-0.933911	-0.276755	0.188456	-0.598401	0.0922426
-1.464	1.66882	0.999793	0.211862	0.92701	2.26107	-0.56866	-0.62361	1.17721	-0.00599	0.039202	-0.09227	-0.38086	-0.80642	-0.78042				-2.0008	-0.666562	-0.274795	1.23152	0.384154	-0.136781	-0.737713	-0.706452	-0.439271	-0.112886	-0.931297	-0.364986	0.172088	-0.646131	0.156752
-1.4396	1.80283	0.944494	0.220306	1.03813	2.46707	-0.57824	-0.6256	1.30578	-0.01828	0.000817	-0.07103	-0.41461	-0.7856	-0.74062				-1.9764	-0.752653	-0.237918	1.33949	0.3925	-0.120096	-0.704357	-0.666798	-0.43861	-0.159041	-0.899407	-0.484486	0.158956	-0.69629	0.208855
-1.4152	1.93224	0.887772	0.20837	1.13492	2.61427	-0.58213	-0.58773	1.43098	-0.04554	-0.02929	-0.03544	-0.45179	-0.78849	-0.70063				-1.952	-0.839981	-0.205803	1.43537	0.400455	-0.111149	-0.663078	-0.615907	-0.427418	-0.206063	-0.838602	-0.620522	0.155965	-0.746186	0.247154
-1.3908	2.0484	0.844361	0.179146	1.21338	2.69527	-0.58569	-0.51583	1.54995	-0.08185	-0.05385	-0.00233	-0.4942	-0.80909	-0.6635				-1.9276	-0.920088	-0.177224	1.51099	0.40872	-0.100582	-0.624787	-0.567688	-0.40984	-0.25462	-0.755643	-0.751744	0.169596	-0.793227	0.272767
-1.3664	2.13785	0.820358	0.137689	1.27396	2.70936	-0.59277	-0.40972	1.66054	-0.12137	-0.07704	0.01162	-0.54307	-0.8376	-0.63132				-1.9032	-0.976624	-0.156477	1.55985	0.41889	-0.0795869	-0.595302	-0.538657	-0.387295	-0.304209	-0.661692	-0.847706	0.195568	-0.835171	0.288554
-1.342	2.18911	0.810278	0.089603	1.32154	2.66203	-0.60423	-0.27029	1.76261	-0.15941	-0.10233	0.00402	-0.59833	-0.87326	-0.60445				-1.8788	-0.995445	-0.150352	1.57941	0.432854	-0.0449863	-0.576485	-0.530489	-0.35726	-0.353733	-0.567185	-0.88089	0.220145	-0.870335	0.2978
-1.3176	2.19631	0.799328	0.041086	1.36323	2.56187	-0.61872	-0.11127	1.85689	-0.19316	-0.13154	-0.01062	-0.65789	-0.92024	-0.58132				-1.8544	-0.972266	-0.164275	1.57206	0.452474	-0.000755686	-0.567664	-0.534928	-0.314896	-0.402614	-0.478563	-0.846709	0.231765	-0.897974	0.303421
-1.2932	2.15912	0.770005	-0.00096	1.40492	2.41877	-0.63503	0.038162	1.93698	-0.22259	-0.162	-0.01932	-0.71776	-0.97418	-0.55902				-1.83	-0.913473	-0.200038	1.54425	0.479372	0.0447337	-0.567643	-0.549059	-0.260354	-0.451708	-0.399415	-0.76384	0.228922	-0.917795	0.307793
-1.2688	2.08125	0.712538	-0.02976	1.44869	2.24487	-0.65409	0.140834	1.9881	-0.25004	-0.1857	-0.02447	-0.77305	-1.02546	-0.53461				-1.8056	-0.833126	-0.256788	1.50462	0.514959	0.0824181	-0.576155	-0.575188	-0.202886	-0.503179	-0.331648	-0.659513	0.218718	-0.928396	0.312701
-1.2444	1.97039	0.633261	-0.03938	1.49272	2.05557	-0.67892	0.166677	1.99924	-0.27767	-0.19388	-0.035	-0.81897	-1.07393	-0.50673				-1.7812	-0.749058	-0.332302	1.4623	0.560652	0.104177	-0.593576	-0.613842	-0.15472	-0.558806	-0.274652	-0.555952	0.212196	-0.92664	0.319526
-1.22	1.83977	0.550657	-0.02527	1.53351	1.86769	-0.71258	0.106878	1.97114	-0.30604	-0.18346	-0.05362	-0.85157	-1.12746	-0.47652				-1.7568	-0.678759	-0.420715	1.42582	0.617659	0.103321	-0.620477	-0.667015	-0.121603	-0.618232	-0.226152	-0.459972	0.218084	-0.908957	0.329338
-1.1956	1.70659	0.48235	0.01429	1.56905	1.69518	-0.75604	-0.01982	1.91236	-0.33469	-0.15837	-0.07991	-0.86845	-1.18765	-0.44792				-1.7324	-0.635424	-0.510896	1.40214	0.68612	0.0759596	-0.657142	-0.743146	-0.100109	-0.679369	-0.184747	-0.365148	0.238948	-0.873382	0.342291
-1.1712	1.58602	0.438566	0.076648	1.60071	1.54583	-0.80739	-0.17219	1.8355	-0.36271	-0.12568	-0.11888	-0.86945	-1.24763	-0.42728				-1.708	-0.624174	-0.590541	1.39588	0.764389	0.0221682	-0.703632	-0.850429	-0.0826684	-0.740014	-0.149852	-0.268725	0.271992	-0.820944	0.356996
-1.1468	1.48579	0.424826	0.155096	1.63262	1.42168	-0.86273	-0.30509	1.75547	-0.38891	-0.09246	-0.17892	-0.85699	-1.30052	-0.42207				-1.6836	-0.640837	-0.652466	1.40939	0.84901	-0.0551621	-0.76077	-0.98377	-0.0641976	-0.797969	-0.121093	-0.180355	0.30788	-0.755557	0.370982
-1.1224	1.40433	0.444111	0.241179	1.66922	1.32192	-0.91759	-0.39253	1.68419	-0.4122	-0.06545	-0.25774	-0.83475	-1.34069	-0.43867				-1.6592	-0.675393	-0.696936	1.44334	0.935268	-0.15214	-0.828553	-1.11917	-0.0451009	-0.850423	-0.0991272	-0.10917	0.333462	-0.682601	0.381701
-1.098	1.33186	0.495802	0.327338	1.71308	1.24522	-0.9676	-0.43727	1.62738	-0.43186	-0.05144	-0.32927	-0.80543	-1.35996	-0.48041				-1.6348	-0.717004	-0.729263	1.49627	1.01817	-0.26333	-0.903643	-1.22447	-0.0306078	-0.894754	-0.084599	-0.0510188	0.341213	-0.607245	0.386765
-1.0736	1.25468	0.573965	0.408302	1.76411	1.19074	-1.00893	-0.45692	1.58736	-0.44737	-0.05629	-0.35599	-0.76939	-1.35114	-0.54638				-1.6104	-0.758321	-0.754723	1.5637	1.09362	-0.380163	-0.979671	-1.28226	-0.0296678	-0.929808	-0.0766359	0.00361504	0.332839	-0.533296	0.383775
-1.0492	1.1615	0.665099	0.480516	1.82036	1.15698	-1.03882	-0.46264	1.56554	-0.45886	-0.08202	-0.31701	-0.7249	-1.31676	-0.63163				-1.586	-0.797555	-0.773502	1.63888	1.15913	-0.491809	-1.04769	-1.3015	-0.0511537	-0.955869	-0.0735968	0.0522889	0.316296	-0.462741	0.370412
-1.0248	1.04838	0.748544	0.540891	1.87945	1.13857	-1.05594	-0.45407	1.56063	-0.46724	-0.12614	-0.21691	-0.66917	-1.27132	-0.72872				-1.5616	-0.835579	-0.780221	1.71407	1.21351	-0.588684	-1.09746	-1.30372	-0.0963015	-0.974263	-0.0749583	0.078091	0.303166	-0.395812	0.344721
-1.0004	0.919929	0.80527	0.586506	1.93907	1.12514	-1.05993	-0.42713	1.5677	-0.47313	-0.18398	-0.07935	-0.59968	-1.23525	-0.82965				-1.5372	-0.871256	-0.768407	1.78153	1.25628	-0.665964	-1.12237	-1.30327	-0.157064	-0.987772	-0.083449	0.0630912	0.304726	-0.331223	0.305446
-0.976	0.787131	0.830383	0.614968	1.99668	1.10364	-1.05046	-0.37915	1.58072	-0.47594	-0.24949	0.059452	-0.51516	-1.22673	-0.92738				-1.5128	-0.901152	-0.733713	1.83475	1.28782	-0.724833	-1.12327	-1.29969	-0.22281	-1.00043	-0.105291	-0.0013891	0.32622	-0.2666	0.252395
-0.9516	0.662175	0.835098	0.624704	2.04869	1.06115	-1.02673	-0.31096	1.59571	-0.47495	-0.31531	0.164887	-0.41612	-1.25311	-1.01622				-1.4884	-0.922232	-0.672242	1.86978	1.31001	-0.770381	-1.1057	-1.28121	-0.284989	-1.0159	-0.146448	-0.110865	0.364975	-0.199198	0.187152
-0.9272	0.553377	0.835871	0.61567	2.09036	0.987201	-0.98829	-0.22999	1.6143	-0.47026	-0.37484	0.218906	-0.30504	-1.30611	-1.09171				-1.464	-0.931734	-0.57878	1.88497	1.32662	-0.806969	-1.07424	-1.23902	-0.336828	-1.03589	-0.206996	-0.24529	0.415384	-0.126409	0.113358
-0.9028	0.464338	0.844259	0.589904	2.11701	0.876358	-0.93542	-0.1487	1.64538	-0.46185	-0.42516	0.222198	-0.18627	-1.36662	-1.15055				-1.4396	-0.925706	-0.449969	1.87979	1.34301	-0.834387	-1.03184	-1.18049	-0.375737	-1.05981	-0.279277	-0.373035	0.473996	-0.0457647	0.0353593
-0.8784	0.396372	0.864807	0.550189	2.12625	0.730363	-0.86805	-0.07742	1.69955	-0.44775	-0.46711	0.188818	-0.06546	-1.4147	-1.19125				-1.4152	-0.899933	-0.2894	1.8544	1.36495	-0.847782	-0.98207	-1.12474	-0.406896	-1.08579	-0.35337	-0.464336	0.536851	0.0450061	-0.0434451
-0.854	0.350208	0.896554	0.498267	2.11989	0.55848	-0.78553	-0.02193	1.78261	-0.42425	-0.50147	0.13585	0.051446	-1.43928	-1.21463				-1.3908	-0.850309	-0.108659	1.81028	1.3967	-0.840871	-0.929593	-1.08848	-0.43963	-1.11183	-0.424248	-0.506416	0.596033	0.147225	-0.120962
-0.8296	0.325859	0.935308	0.435342	2.10443	0.376128	-0.68789	0.012144	1.89414	-0.38911	-0.52592	0.072027	0.159086	-1.44297	-1.22388				-1.3664	-0.773419	0.0763375	1.75081	1.43895	-0.809066	-0.88023	-1.07805	-0.479969	-1.13639	-0.492171	-0.504192	0.643996	0.260162	-0.196148
-0.8052	0.321777	0.974757	0.363528	2.0895	0.201768	-0.57721	0.014481	2.02665	-0.34516	-0.53718	0.002721	0.2532	-1.4393	-1.22404				-1.342	-0.671028	0.248855	1.68066	1.48802	-0.749326	-0.840584	-1.094	-0.526661	-1.15846	-0.557816	-0.470416	0.68043	0.380488	-0.268502
-0.7808	0.333328	1.0061	0.286013	2.08407	0.052216	-0.45771	-0.02935	2.16789	-0.30016	-0.53502	-0.05682	0.330956	-1.44432	-1.21987				-1.3176	-0.552787	0.392206	1.60448	1.53678	-0.658358	-0.814499	-1.13692	-0.573342	-1.17751	-0.619985	-0.422125	0.713127	0.50257	-0.336826
-0.7564	0.352253	1.02063	0.206542	2.09268	-0.06202	-0.33289	-0.13089	2.30912	-0.26253	-0.52404	-0.0876	0.391312	-1.46671	-1.21362				-1.2932	-0.431157	0.491358	1.52634	1.5776	-0.533806	-0.800228	-1.20177	-0.614065	-1.19401	-0.677471	-0.37469	0.75216	0.619678	-0.397893
-0.732	0.371103	1.01277	0.129037	2.11353	-0.1392	-0.20302	-0.29158	2.44885	-0.2372	-0.51309	-0.08592	0.435261	-1.50384	-1.20516				-1.2688	-0.313133	0.537421	1.44956	1.60593	-0.377285	-0.792449	-1.27627	-0.644426	-1.21022	-0.729964	-0.331878	0.804421	0.726121	-0.44659
-0.7076	0.389782	0.980489	0.057266	2.13954	-0.185	-0.06676	-0.4977	2.58819	-0.22362	-0.5123	-0.06633	0.465647	-1.54757	-1.19368				-1.2444	-0.19553	0.530301	1.3764	1.62236	-0.195108	-0.785477	-1.35109	-0.661488	-1.22975	-0.775869	-0.289324	0.871462	0.819135	-0.478014
-0.6832	0.415693	0.926063	-0.0056	2.16199	-0.2085	0.076381	-0.71934	2.72539	-0.21664	-0.52774	-0.04207	0.486339	-1.59028	-1.17841				-1.22	-0.0650321	0.476184	1.30823	1.63103	0.00201971	-0.775097	-1.42008	-0.666846	-1.256	-0.809668	-0.241826	0.949555	0.899479	-0.48977
-0.6588	0.456054	0.855906	-0.05768	2.1744	-0.21901	0.224804	-0.92127	2.85353	-0.20962	-0.55715	-0.01058	0.500947	-1.6242	-1.15827				-1.1956	0.0957185	0.384083	1.24684	1.63586	0.198232	-0.759969	-1.47424	-0.665433	-1.29129	-0.822587	-0.182946	1.03241	0.971033	-0.482484
-0.6344	0.50853	0.776485	-0.09877	2.17407	-0.22446	0.373972	-1.08078	2.96215	-0.19626	-0.59094	0.036435	0.511721	-1.64296	-1.13125				-1.1712	0.29569	0.263714	1.19456	1.63829	0.373519	-0.742384	-1.50685	-0.661227	-1.33646	-0.80818	-0.106187	1.1124	1.03945	-0.458847
-0.61	0.557827	0.689725	-0.13001	2.16115	-0.23002	0.516174	-1.19437	3.04255	-0.17025	-0.61838	0.099562	0.51913	-1.64578	-1.09448				-1.1468	0.526423	0.124532	1.15288	1.63814	0.508971	-0.728781	-1.52035	-0.656943	-1.39072	-0.767828	-0.00994209	1.17942	1.11004	-0.42261
-0.5856	0.582683	0.591933	-0.15305	2.13661	-0.23804	0.642167	-1.26887	3.09211	-0.12614	-0.63514	0.172024	0.522172	-1.63485	-1.04567				-1.1224	0.764214	-0.0229002	1.12212	1.63537	0.592508	-0.729464	-1.52477	-0.655172	-1.452	-0.710396	0.0967273	1.22012	1.18616	-0.37821
-0.5612	0.569143	0.47825	-0.16956	2.10122	-0.24937	0.743995	-1.31231	3.1157	-0.0616	-0.64434	0.242674	0.519271	-1.61219	-0.98458				-1.098	0.976217	-0.166827	1.10272	1.63106	0.62043	-0.755252	-1.53424	-0.657071	-1.51724	-0.648476	0.195395	1.21601	1.26887	-0.330693
-0.5368	0.519708	0.348999	-0.18043	2.05588	-0.26362	0.817338	-1.33186	3.12522	0.022125	-0.65028	0.297834	0.509385	-1.58086	-0.91341				-1.0736	1.12628	-0.298455	1.0957	1.62696	0.596588	-0.811792	-1.56361	-0.661686	-1.58263	-0.59475	0.271911	1.14629	1.35708	-0.28521
-0.5124	0.450586	0.21088	-0.18484	2.00243	-0.27887	0.862792	-1.33253	3.13657	0.120299	-0.65399	0.324831	0.492819	-1.54074	-0.83662				-1.0492	1.18641	-0.415288	1.10175	1.62376	0.532691	-0.896478	-1.61921	-0.668067	-1.64441	-0.557828	0.328308	0.998722	1.4476	-0.246364
-0.488	0.380043	0.073623	-0.17996	1.94342	-0.29356	0.885409	-1.31675	3.16215	0.224532	-0.65396	0.313851	0.47168	-1.48483	-0.7608				-1.0248	1.14991	-0.520071	1.1199	1.61946	0.447659	-1.00119	-1.69042	-0.674432	-1.69979	-0.540079	0.378413	0.780081	1.53536	-0.218235
-0.4636	0.319865	-0.05136	-0.16172	1.88091	-0.30875	0.891953	-1.28493	3.20306	0.32417	-0.64717	0.259923	0.449754	-1.40965	-0.69382				-1.0004	1.03376	-0.617824	1.14666	1.60939	0.36314	-1.11613	-1.75704	-0.673512	-1.7467	-0.539766	0.433752	0.517316	1.61443	-0.204406
-0.4392	0.275189	-0.15172	-0.12584	1.81562	-0.3281	0.887445	-1.23685	3.24828	0.408642	-0.63069	0.167239	0.431466	-1.32613	-0.64265				-0.976	0.869645	-0.711241	1.17649	1.5879	0.297341	-1.23012	-1.80559	-0.655476	-1.78248	-0.553488	0.498196	0.246165	1.67978	-0.207
-0.4148	0.246891	-0.21762	-0.06907	1.74789	-0.35597	0.873139	-1.1762	3.28232	0.470118	-0.60451	0.050054	0.420427	-1.25233	-0.61133				-0.9516	0.693912	-0.795084	1.20327	1.55029	0.261161	-1.33132	-1.83369	-0.619425	-1.80356	-0.577195	0.570489	-0.00231927	1.72927	-0.225358
-0.3904	0.231332	-0.24292	0.009878	1.67926	-0.3951	0.847109	-1.11355	3.29456	0.504881	-0.57189	-0.0716	0.418503	-1.19833	-0.60007				-0.9272	0.543056	-0.856113	1.22173	1.49439	0.257696	-1.41134	-1.84639	-0.577212	-1.80721	-0.608008	0.643308	-0.205547	1.76462	-0.255818
-0.366	0.220074	-0.22442	0.109359	1.61286	-0.44457	0.80767	-1.0614	3.28349	0.511702	-0.53816	-0.17728	0.425467	-1.1639	-0.60556				-0.9028	0.44957	-0.881012	1.22818	1.42167	0.283562	-1.46822	-1.85522	-0.544037	-1.79339	-0.64537	0.703852	-0.34898	1.79017	-0.292938
-0.3416	0.204597	-0.16451	0.2244	1.55284	-0.49948	0.757327	-1.02563	3.25607	0.490158	-0.5092	-0.25072	0.438981	-1.14558	-0.62187				-0.8784	0.432569	-0.865424	1.22123	1.33672	0.330961	-1.504	-1.87395	-0.527886	-1.76447	-0.689971	0.740981	-0.426766	1.81029	-0.331106
-0.3172	0.182956	-0.07304	0.347878	1.50332	-0.55274	0.703076	-1.00014	3.22137	0.440925	-0.48867	-0.28444	0.455172	-1.14021	-0.64144				-0.854	0.489199	-0.817529	1.20177	1.24483	0.390416	-1.52038	-1.91204	-0.525914	-1.72345	-0.742023	0.753872	-0.442883	1.82723	-0.36532
-0.2928	0.160665	0.036148	0.472773	1.4674	-0.59846	0.652287	-0.96782	3.18165	0.367038	-0.47681	-0.28516	0.469829	-1.14347	-0.65599				-0.8296	0.596136	-0.755019	1.17179	1.14959	0.453502	-1.51848	-1.97375	-0.527418	-1.67339	-0.799236	0.754198	-0.411338	1.84059	-0.390704
-0.2684	0.146673	0.1474	0.593828	1.44637	-0.63453	0.60859	-0.91019	3.13043	0.275312	-0.47231	-0.27348	0.479638	-1.14665	-0.65819				-0.8052	0.719801	-0.697698	1.13322	1.05256	0.513531	-1.50221	-2.05769	-0.521768	-1.61846	-0.8555	0.757882	-0.350437	1.8481	-0.401696
-0.244	0.150948	0.244043	0.708303	1.43967	-0.66302	0.571649	-0.81937	3.06038	0.175979	-0.47368	-0.26747	0.48287	-1.13702	-0.64312				-0.7808	0.826503	-0.66019	1.08751	0.954563	0.564064	-1.48028	-2.15397	-0.505542	-1.5636	-0.903711	0.775556	-0.27484	1.84714	-0.392613
-0.2196	0.183749	0.313359	0.815686	1.44564	-0.68842	0.539713	-0.70143	2.9722	0.079343	-0.47906	-0.26359	0.479592	-1.10267	-0.60907				-0.7564	0.887594	-0.648188	1.03569	0.857584	0.597937	-1.46394	-2.24431	-0.48282	-1.51206	-0.940775	0.810201	-0.1922	1.83588	-0.359709
-0.1952	0.252898	0.350261	0.915414	1.46296	-0.71539	0.511428	-0.57175	2.8741	-0.00809	-0.48705	-0.2442	0.471585	-1.03748	-0.55888				-0.732	0.883209	-0.658916	0.978938	0.765949	0.607727	-1.46189	-2.30702	-0.458752	-1.46445	-0.968482	0.855427	-0.103576	1.8137	-0.303025
-0.1708	0.360924	0.355608	1.00444	1.49171	-0.74723	0.48581	-0.45185	2.77157	-0.08557	-0.49766	-0.19891	0.461823	-0.94392	-0.50036				-0.7076	0.807826	-0.684894	0.919258	0.686043	0.587751	-1.47584	-2.3257	-0.43208	-1.41986	-0.990512	0.892953	-0.00700677	1.78119	-0.226688
-0.1464	0.505094	0.333118	1.07794	1.53293	-0.78506	0.461861	-0.36754	2.66022	-0.15782	-0.51068	-0.13216	0.453488	-0.83139	-0.4442				-0.6832	0.671525	-0.718068	0.859814	0.624093	0.537191	-1.49982	-2.29969	-0.395764	-1.37719	-1.01056	0.900702	0.0976736	1.74029	-0.137533
-0.122	0.679624	0.285724	1.13255	1.58614	-0.82737	0.439929	-0.34227	2.53147	-0.23247	-0.52356	-0.06445	0.449019	-0.71393	-0.4003				-0.6588	0.492779	-0.750469	0.804179	0.583347	0.46131	-1.52451	-2.24468	-0.345005	-1.33594	-1.03257	0.868729	0.208108	1.6942	-0.0430368
-0.0976	0.878129	0.21453	1.16888	1.6471	-0.87032	0.423687	-0.38664	2.38551	-0.31591	-0.53245	-0.0274	0.449463	-0.61073	-0.3754				-0.6344	0.289744	-0.773464	0.755096	0.562564	0.369206	-1.54284	-2.17734	-0.280445	-1.29703	-1.05998	0.804607	0.322403	1.64661	0.0504941
-0.0732	1.09412	0.123815	1.19132	1.70808	-0.90839	0.417979	-0.48729	2.23601	-0.41006	-0.53604	-0.04546	0.454122	-0.54149	-0.37259				-0.61	0.0772311	-0.780589	0.71342	0.556459	0.270042	-1.55235	-2.10152	-0.205011	-1.26252	-1.09271	0.728279	0.438153	1.6007	0.139236
-0.0488	1.31939	0.024498	1.2055	1.76073	-0.93531	0.424228	-0.60639	2.10464	-0.51201	-0.53764	-0.12096	0.460911	-0.51419	-0.39191				-0.5856	-0.130774	-0.770148	0.677301	0.557404	0.170589	-1.55432	-2.011	-0.122163	-1.23394	-1.12599	0.665576	0.547413	1.55872	0.222212
-0.0244	1.54222	-0.0707	1.21558	1.79926	-0.94562	0.44014	-0.70228	2.01395	-0.61608	-0.54312	-0.23123	0.467562	-0.5192	-0.431				-0.5612	-0.317392	-0.744259	0.642864	0.55773	0.0749593	-1.55127	-1.90146	-0.035679	-1.21044	-1.15292	0.63613	0.635019	1.52216	0.300268
0	1.74686	-0.15581	1.22267	1.82148	-0.93595	0.463043	-0.75373	1.9812	-0.71683	-0.55731	-0.33835	0.472748	-0.53681	-0.48538				-0.5368	-0.463449	-0.708347	0.606514	0.551735	-0.0149724	-1.54406	-1.77824	0.0512072	-1.18777	-1.16863	0.646683	0.676975	1.49222	0.374737
0.0244	1.91542	-0.23427	1.22427	1.82817	-0.90507	0.491674	-0.76279	2.01665	-0.81156	-0.58227	-0.41023	0.476084	-0.54906	-0.54903				-0.5124	-0.553895	-0.669567	0.566268	0.53635	-0.0993545	-1.53178	-1.64905	0.136632	-1.15837	-1.1733	0.698852	0.639689	1.47031	0.44719
0.0488	2.0328	-0.31252	1.21523	1.82182	-0.85332	0.525014	-0.74038	2.12552	-0.90079	-0.61831	-0.43469	0.477366	-0.54738	-0.61604				-0.488	-0.583253	-0.631272	0.52193	0.510804	-0.179915	-1.51472	-1.50668	0.219365	-1.11357	-1.17189	0.792555	0.491388	1.45808	0.519701
0.0732	2.09219	-0.39166	1.19053	1.80545	-0.78263	0.560602	-0.69401	2.30486	-0.98722	-0.66472	-0.4187	0.476263	-0.53499	-0.68265				-0.4636	-0.555217	-0.591411	0.475966	0.476053	-0.259115	-1.49641	-1.3263	0.294598	-1.04753	-1.17035	0.92245	0.215629	1.45675	0.594489
0.0976	2.09738	-0.46507	1.14807	1.78175	-0.6973	0.594937	-0.62366	2.53811	-1.07436	-0.71862	-0.37956	0.472643	-0.52054	-0.74812				-0.4392	-0.481713	-0.547885	0.433836	0.43378	-0.338003	-1.48186	-1.08797	0.352365	-0.959135	-1.17224	1.08002	-0.192002	1.46587	0.67326
0.122	2.06048	-0.52459	1.08965	1.75285	-0.60465	0.625454	-0.5272	2.79928	-1.16488	-0.7743	-0.33289	0.46662	-0.50744	-0.81404				-0.4148	-0.382008	-0.500297	0.402107	0.385377	-0.41226	-1.47452	-0.799693	0.384773	-0.850925	-1.17827	1.25579	-0.731908	1.48288	0.756968
0.1464	1.99653	-0.56797	1.02016	1.72074	-0.51439	0.652436	-0.41524	3.06197	-1.25807	-0.82497	-0.28718	0.458029	-0.49228	-0.88309				-0.3904	-0.275863	-0.447769	0.385891	0.331897	-0.470621	-1.47596	-0.496893	0.394372	-0.727705	-1.18657	1.43266	-1.39199	1.5042	0.846151
0.1708	1.91901	-0.5978	0.945611	1.68814	-0.43683	0.679551	-0.30919	3.30549	-1.34826	-0.86471	-0.24715	0.446045	-0.47173	-0.95763				-0.366	-0.174881	-0.391707	0.38757	0.274639	-0.499625	-1.48673	-0.227019	0.394336	-0.59545	-1.19381	1.57897	-2.13321	1.52658	0.941512
0.1952	1.84015	-0.61799	0.870722	1.65857	-0.3807	0.71188	-0.21699	3.52117	-1.42712	-0.88862	-0.21237	0.429699	-0.44749	-1.03861				-0.3416	-0.0807626	-0.339456	0.406758	0.215336	-0.49091	-1.50681	-0.031278	0.401172	-0.460305	-1.19793	1.65741	-2.89012	1.54753	1.04341
0.2196	1.77347	-0.63435	0.797798	1.63518	-0.35128	0.752837	-0.12519	3.71256	-1.48894	-0.89336	-0.17228	0.40902	-0.42737	-1.12511				-0.3172	0.0102378	-0.303039	0.440865	0.155967	-0.445446	-1.53656	0.0744925	0.426816	-0.328373	-1.19827	1.64749	-3.58693	1.56515	1.14976
0.244	1.73266	-0.65162	0.727555	1.61909	-0.34926	0.802217	-0.01552	3.88477	-1.53291	-0.87926	-0.11499	0.385615	-0.42199	-1.21474				-0.2928	0.101931	-0.295618	0.485771	0.0987263	-0.372872	-1.5769	0.106168	0.475971	-0.205945	-1.19314	1.55876	-4.1582	1.57753	1.25479
0.2684	1.72607	-0.67137	0.660413	1.60897	-0.37107	0.855615	0.124712	4.03769	-1.56004	-0.84941	-0.04085	0.362057	-0.437	-1.30379				-0.2684	0.193436	-0.326036	0.535957	0.0456521	-0.286925	-1.62859	0.099621	0.546115	-0.0992549	-1.18063	1.42251	-4.56304	1.58238	1.3513
0.2928	1.7513	-0.69733	0.596529	1.60183	-0.41015	0.905447	0.303871	4.16785	-1.56992	-0.80694	0.039757	0.340822	-0.46794	-1.38754				-0.244	0.277109	-0.393286	0.584274	-0.00233739	-0.20133	-1.69205	0.0914341	0.626173	-0.0141627	-1.16274	1.27693	-4.78694	1.57687	1.43473
0.3172	1.79724	-0.73443	0.5351	1.59458	-0.45766	0.943347	0.523099	4.26899	-1.56145	-0.75542	0.117321	0.323744	-0.50521	-1.4613				-0.2196	0.344037	-0.487606	0.622416	-0.0460181	-0.129526	-1.76669	0.100464	0.697595	0.0443802	-1.14488	1.15685	-4.83393	1.55752	1.50524
0.3416	1.85293	-0.78037	0.474412	1.58606	-0.50386	0.962399	0.769822	4.33124	-1.53458	-0.69963	0.188	0.311889	-0.54339	-1.52201				-0.1952	0.394453	-0.597395	0.642206	-0.0873644	-0.0858794	-1.84959	0.122627	0.7415	0.0742343	-1.13093	1.07965	-4.71764	1.52067	1.56685
0.366	1.91369	-0.82579	0.412686	1.57817	-0.54157	0.958914	1.02158	4.34534	-1.49108	-0.64335	0.252162	0.305682	-0.58418	-1.56952				-0.1708	0.440708	-0.714094	0.637574	-0.128712	-0.084516	-1.93575	0.141477	0.74686	0.0776493	-1.1223	1.03582	-4.45808	1.46374	1.62552
0.3904	1.97806	-0.86056	0.349251	1.57495	-0.56907	0.933726	1.25495	4.31105	-1.43526	-0.58835	0.313272	0.305376	-0.63236	-1.60672				-0.1464	0.496909	-0.832722	0.606986	-0.172293	-0.135525	-2.01949	0.140817	0.711596	0.0597038	-1.1204	0.999821	-4.07947	1.38617	1.68816
0.4148	2.04245	-0.87725	0.285072	1.58034	-0.58978	0.891994	1.44264	4.2399	-1.37374	-0.53702	0.376366	0.311507	-0.69051	-1.6381				-0.122	0.566605	-0.950011	0.554024	-0.21995	-0.241347	-2.09499	0.113769	0.637348	0.0248506	-1.12656	0.950674	-3.60795	1.29019	1.76185
0.4392	2.10172	-0.87272	0.221439	1.59657	-0.61044	0.841279	1.55225	4.14925	-1.31451	-0.49434	0.44543	0.324813	-0.75476	-1.66797				-0.0976	0.641402	-1.06278	0.484998	-0.272834	-0.395376	-2.15674	0.0676356	0.527366	-0.0247181	-1.14094	0.882783	-3.07464	1.1812	1.8528
0.4636	2.15225	-0.8462	0.158337	1.62401	-0.63961	0.789131	1.56398	4.05396	-1.26543	-0.46445	0.522171	0.34556	-0.8158	-1.70007				-0.0732	0.708767	-1.16925	0.406209	-0.331293	-0.582877	-2.20152	0.018307	0.390315	-0.0873874	-1.16229	0.805207	-2.51859	1.06732	1.9645
0.488	2.19227	-0.79652	0.094321	1.66171	-0.68533	0.741485	1.48785	3.96079	-1.23086	-0.44554	0.601005	0.372663	-0.86573	-1.73792				-0.0488	0.760838	-1.2688	0.32329	-0.39476	-0.783914	-2.22973	-0.0219419	0.239721	-0.159356	-1.1877	0.734446	-1.98398	0.957669	2.09511
0.5124	2.22209	-0.7234	0.027399	1.70835	-0.75213	0.701502	1.35593	3.86924	-1.20999	-0.43156	0.663745	0.403288	-0.89974	-1.78432				-0.0244	0.797813	-1.35796	0.241578	-0.461409	-0.977995	-2.24457	-0.0480424	0.0855799	-0.234428	-1.2148	0.682833	-1.51546	0.859861	2.23592
0.5368	2.24539	-0.63129	-0.04406	1.76313	-0.8389	0.668794	1.19997	3.77729	-1.19901	-0.41805	0.686596	0.433571	-0.90944	-1.84043				0	0.823596	-1.42985	0.165338	-0.528455	-1.1494	-2.25047	-0.058957	-0.068296	-0.306345	-1.24388	0.652229	-1.15141	0.77834	2.3735
0.5612	2.26791	-0.52881	-0.12091	1.82568	-0.93884	0.640876	1.04294	3.68518	-1.19343	-0.40395	0.655181	0.460227	-0.88463	-1.9055				0.0244	0.840166	-1.47739	0.0965162	-0.593634	-1.29073	-2.25338	-0.0602638	-0.216535	-0.37005	-1.27522	0.638521	-0.916266	0.714431	2.49459
0.5856	2.29426	-0.42293	-0.20327	1.89491	-1.04137	0.616872	0.907011	3.59531	-1.18886	-0.39062	0.57161	0.482036	-0.82534	-1.97753				0.0488	0.847884	-1.49576	0.0349706	-0.656539	-1.40193	-2.26184	-0.0623319	-0.346907	-0.421056	-1.30515	0.635297	-0.817031	0.66721	2.59034
0.61	2.32618	-0.31859	-0.29008	1.96807	-1.13531	0.599598	0.815475	3.51072	-1.18173	-0.38109	0.446473	0.500291	-0.7447	-2.05452				0.0732	0.849781	-1.48323	-0.0204461	-0.71847	-1.48626	-2.28495	-0.0667802	-0.444432	-0.455486	-1.32642	0.633599	-0.844389	0.634465	2.65824
0.6344	2.36275	-0.22314	-0.37812	2.04099	-1.21186	0.594139	0.780797	3.43361	-1.16964	-0.37865	0.289251	0.517978	-0.65924	-2.13521				0.0976	0.85458	-1.44101	-0.0712471	-0.781258	-1.54773	-2.32768	-0.061506	-0.500678	-0.4713	-1.33338	0.62857	-0.978412	0.614027	2.70108
0.6588	2.40115	-0.1435	-0.46175	2.10966	-1.26494	0.605698	0.79409	3.36633	-1.15213	-0.3852	0.113794	0.538104	-0.58054	-2.21888				0.122	0.875767	-1.37287	-0.118788	-0.845883	-1.59113	-2.38892	-0.0353655	-0.520962	-0.469319	-1.32733	0.626333	-1.19524	0.60491	2.72368
0.6832	2.43914	-0.07939	-0.53429	2.17275	-1.28981	0.637609	0.827574	3.31244	-1.13186	-0.4013	-0.05468	0.562045	-0.51413	-2.30475				0.1464	0.926592	-1.2861	-0.163745	-0.911218	-1.62174	-2.46383	0.00750654	-0.521554	-0.453588	-1.3156	0.63723	-1.46915	0.607043	2.72943
0.7076	2.47904	-0.02636	-0.5897	2.23338	-1.28243	0.688906	0.848463	3.27268	-1.11447	-0.42739	-0.18785	0.588826	-0.46234	-2.39181				0.1708	1.01393	-1.19359	-0.206213	-0.973768	-1.64482	-2.54716	0.0522941	-0.518357	-0.430937	-1.30624	0.665307	-1.77307	0.619725	2.71953
0.732	2.52725	0.011579	-0.62356	2.29813	-1.24123	0.754277	0.837667	3.241	-1.10683	-0.46353	-0.26683	0.615564	-0.42557	-2.47839				0.1952	1.1339	-1.11216	-0.246284	-1.02915	-1.66571	-2.63492	0.0840308	-0.51826	-0.40881	-1.30503	0.705067	-2.07953	0.64029	2.69422
0.7564	2.58887	0.017107	-0.63375	2.37305	-1.17003	0.82729	0.800114	3.20992	-1.11601	-0.50793	-0.28959	0.638467	-0.40137	-2.56187				0.2196	1.27098	-1.05487	-0.284512	-1.07432	-1.68919	-2.72515	0.088741	-0.517734	-0.391917	-1.31549	0.743655	-2.3602	0.664216	2.65412
0.7808	2.66458	-0.02944	-0.62034	2.45941	-1.07949	0.903285	0.759662	3.17738	-1.14913	-0.5568	-0.2724	0.653734	-0.38416	-2.6391				0.244	1.40218	-1.02599	-0.321837	-1.10883	-1.71902	-2.81816	0.0550343	-0.505674	-0.380802	-1.33777	0.769821	-2.59046	0.686568	2.60129
0.8052	2.75251	-0.13566	-0.58478	2.55198	-0.98503	0.979706	0.745069	3.1445	-1.21203	-0.60662	-0.23785	0.658304	-0.36665	-2.70692				0.2684	1.50529	-1.02411	-0.358743	-1.13488	-1.75902	-2.91428	-0.015729	-0.469515	-0.37322	-1.36717	0.784386	-2.75894	0.703756	2.53968
0.8296	2.85005	-0.29026	-0.52975	2.64014	-0.90172	1.05501	0.777752	3.10948	-1.30578	-0.65623	-0.19425	0.650567	-0.34552	-2.76203				0.2928	1.56768	-1.04714	-0.394398	-1.15683	-1.81348	-3.01041	-0.10147	-0.404339	-0.366378	-1.39702	0.799914	-2.86891	0.714591	2.47428
0.854	2.95258	-0.46693	-0.46007	2.71181	-0.83983	1.12734	0.863278	3.06817	-1.42378	-0.70591	-0.13344	0.630806	-0.32646	-2.80126				0.3172	1.59288	-1.0929	-0.427078	-1.18026	-1.88531	-3.10055	-0.167499	-0.317461	-0.35893	-1.42452	0.828439	-2.92961	0.720032	2.40919
0.8784	3.04966	-0.63523	-0.38287	2.75863	-0.8033	1.19306	0.98362	3.02153	-1.55229	-0.75483	-0.04989	0.600965	-0.31857	-2.8227				0.3416	1.60269	-1.15767	-0.455361	-1.21057	-1.97443	-3.17937	-0.187467	-0.222227	-0.352112	-1.45026	0.86566	-2.94851	0.721908	2.34623
0.9028	3.11909	-0.77106	-0.30647	2.77971	-0.79027	1.24668	1.0997	2.97924	-1.67452	-0.80102	0.050812	0.563846	-0.32346	-2.82638				0.366	1.63015	-1.23541	-0.478148	-1.25214	-2.07781	-3.24202	-0.15595	-0.130466	-0.349875	-1.47108	0.888556	-2.9285	0.721523	2.28452
0.9272	3.12786	-0.86316	-0.23865	2.78073	-0.79405	1.28215	1.16916	2.95097	-1.77522	-0.84309	0.159764	0.522332	-0.33099	-2.81406				0.3904	1.69772	-1.31472	-0.493758	-1.30798	-2.18987	-3.2809	-0.083582	-0.050824	-0.358511	-1.47586	0.875962	-2.86851	0.718772	2.2216
0.9516	3.04959	-0.91558	-0.18564	2.76934	-0.80472	1.29495	1.16782	2.93433	-1.84303	-0.87987	0.268358	0.479095	-0.32249	-2.78796				0.4148	1.79291	-1.37569	-0.499745	-1.3792	-2.30209	-3.28503	0.010387	0.0136359	-0.385674	-1.44451	0.829683	-2.76614	0.711911	2.15542
0.976	2.88557	-0.94469	-0.15178	2.75108	-0.81196	1.2851	1.09808	2.91648	-1.87088	-0.90892	0.368328	0.43662	-0.28031	-2.74955				0.4392	1.87462	-1.39598	-0.492898	-1.46334	-2.40268	-3.24235	0.101593	0.0662285	-0.438326	-1.34945	0.773146	-2.62053	0.698447	2.08656
1.0004	2.66757	-0.97018	-0.13893	2.72901	-0.80815	1.25898	0.97799	2.88832	-1.85673	-0.92531	0.452709	0.396953	-0.19789	-2.69956				0.4636	1.9122	-1.36446	-0.46782	-1.55215	-2.47676	-3.14203	0.171745	0.1103	-0.519281	-1.1642	0.737238	-2.43291	0.677943	2.01993
1.0248	2.44034	-1.00605	-0.14627	2.70591	-0.78947	1.22752	0.829849	2.85275	-1.80469	-0.92102	0.514085	0.360955	-0.08162	-2.63891				0.488	1.91038	-1.28768	-0.414751	-1.63103	-2.50729	-2.97935	0.223914	0.144647	-0.623724	-0.87621	0.754758	-2.20611	0.655966	1.96561
1.0492	2.24093	-1.05533	-0.17057	2.68568	-0.75493	1.20094	0.682699	2.81978	-1.72392	-0.88696	0.545422	0.327775	0.05304	-2.56983				0.5124	1.89725	-1.18343	-0.319014	-1.68091	-2.47509	-2.76253	0.287744	0.165914	-0.737825	-0.49508	0.864612	-1.94624	0.646535	1.9383
1.0736	2.0918	-1.10868	-0.20698	2.67234	-0.70566	1.18307	0.571577	2.79981	-1.62545	-0.81627	0.54299	0.295395	0.184834	-2.49671				0.5368	1.90284	-1.07169	-0.16288	-1.6812	-2.35754	-2.51363	0.413818	0.172315	-0.838373	-0.0512388	1.10584	-1.66406	0.670265	1.95462
1.098	2.00585	-1.15024	-0.25041	2.66753	-0.64484	1.17019	0.521902	2.80003	-1.51992	-0.70581	0.506251	0.262009	0.29303	-2.42636				0.5612	1.95394	-0.971741	0.0708585	-1.61614	-2.13112	-2.25943	0.653509	0.167215	-0.893674	0.415338	1.49547	-1.37204	0.746614	2.02851
1.1224	1.98896	-1.16499	-0.29685	2.66859	-0.57695	1.15505	0.537598	2.8211	-1.41847	-0.55882	0.439623	0.227015	0.366845	-2.36689				0.5856	2.0781	-0.901158	0.393432	-1.48353	-1.78134	-2.02146	1.02864	0.16256	-0.870855	0.869519	2.00883	-1.07631	0.883639	2.16744
1.1468	2.03931	-1.14	-0.34401	2.66897	-0.50644	1.13124	0.610122	2.85573	-1.33406	-0.38724	0.356767	0.190887	0.407772	-2.32554				0.61	2.29483	-0.871496	0.804263	-1.29642	-1.31118	-1.81126	1.51948	0.177037	-0.747107	1.28831	2.58115	-0.775243	1.07431	2.37311
1.1712	2.15134	-1.06765	-0.39106	2.66063	-0.43664	1.09638	0.732227	2.89176	-1.27935	-0.20868	0.280417	0.154373	0.420782	-2.30669				0.6344	2.59777	-0.885881	1.28888	-1.07448	-0.740187	-1.62748	2.08321	0.230406	-0.514157	1.6605	3.13458	-0.478296	1.30306	2.643
1.1956	2.3169	-0.95353	-0.43788	2.63688	-0.36919	1.05411	0.893186	2.91641	-1.26199	-0.03941	0.233119	0.117686	0.404645	-2.31117				0.6588	2.95457	-0.941168	1.82276	-0.834693	-0.0993821	-1.45655	2.68198	0.341389	-0.175318	1.98563	3.61385	-0.226097	1.55481	2.96868
1.22	2.51819	-0.81695	-0.48458	2.59479	-0.30475	1.01273	1.06961	2.91907	-1.28166	0.110425	0.22437	0.080026	0.353564	-2.33679				0.6832	3.32746	-1.03051	2.38016	-0.588551	0.572539	-1.28099	3.29218	0.524825	0.255392	2.2716	4.00511	-0.0819667	1.81893	3.33482
1.2444	2.72382	-0.68165	-0.53045	2.5361	-0.24463	0.980239	1.23238	2.89479	-1.33036	0.237889	0.246924	0.039777	0.268235	-2.37918				0.7076	3.6899	-1.14593	2.94284	-0.344351	1.23254	-1.08949	3.88802	0.78421	0.751187	2.52693	4.32702	-0.101138	2.08897	3.72269
1.2688	2.89699	-0.56732	-0.57235	2.46615	-0.19089	0.959161	1.35641	2.8477	-1.39592	0.346508	0.285195	-0.00451	0.162324	-2.43253				0.732	4.02538	-1.28224	3.50094	-0.109581	1.83717	-0.880332	4.42943	1.11132	1.27574	2.75385	4.60086	-0.300704	2.36151	4.11467
1.2932	3.01039	-0.48625	-0.6041	2.39222	-0.14427	0.945543	1.42793	2.79001	-1.46678	0.442856	0.32631	-0.05303	0.055623	-2.49065				0.7564	4.3204	-1.43885	4.0447	0.109398	2.34733	-0.658378	4.87399	1.49456	1.79113	2.94935	4.82918	-0.656231	2.63535	4.49674
1.3176	3.05475	-0.44445	-0.61842	2.32199	-0.10172	0.933221	1.45443	2.73684	-1.5337	0.53239	0.365722	-0.10422	-0.03875	-2.54791				0.7808	4.56832	-1.61477	4.55781	0.309055	2.73456	-0.432282	5.19435	1.92483	2.26245	3.1107	5.00818	-1.13211	2.9099	4.85879
1.342	3.03578	-0.44354	-0.6087	2.26162	-0.05684	0.918017	1.45845	2.70149	-1.58897	0.618974	0.408288	-0.15491	-0.11912	-2.59993				0.8052	4.78132	-1.7992	5.02201	0.488388	2.98602	-0.213601	5.38801	2.39593	2.65901	3.23935	5.14855	-1.70766	3.1831	5.19243
1.3664	2.96525	-0.47746	-0.56885	2.21436	-0.00225	0.897567	1.45114	2.69188	-1.62696	0.705925	0.465043	-0.20101	-0.19022	-2.64414				0.8296	4.99115	-1.96794	5.42592	0.646627	3.10536	-0.0149826	5.47375	2.89987	2.95651	3.34118	5.26612	-2.37431	3.45141	5.48962
1.3908	2.85366	-0.53084	-0.49317	2.18137	0.06822	0.869616	1.41884	2.70743	-1.64522	0.795575	0.544296	-0.23831	-0.25584	-2.67946				0.854	5.22909	-2.08851	5.7665	0.781631	3.10876	0.152757	5.47668	3.42225	3.13989	3.42318	5.35495	-3.1235	3.71144	5.74457
1.4152	2.71026	-0.58741	-0.37821	2.16395	0.156957	0.832287	1.34032	2.73681	-1.64423	0.889235	0.643081	-0.26294	-0.31495	-2.70562				0.8784	5.50176	-2.12825	6.04466	0.890269	3.01923	0.282628	5.42035	3.94492	3.20493	3.48952	5.3865	-3.9387	3.96063	5.95572
1.4396	2.54947	-0.63613	-0.22577	2.16408	0.259918	0.785806	1.20891	2.76108	-1.626	0.987331	0.744257	-0.27173	-0.36317	-2.72312				0.9028	5.78594	-2.06505	6.26221	0.969851	2.86136	0.37297	5.32591	4.45043	3.1592	3.54164	5.33997	-4.78741	4.19651	6.12541
1.464	2.39486	-0.66464	-0.044	2.1832	0.367112	0.732832	1.03365	2.76451	-1.59157	1.08835	0.825172	-0.26266	-0.395	-2.73344				0.9272	6.04775	-1.89882	6.42131	1.01912	2.65766	0.428151	5.20871	4.92257	3.02146	3.58188	5.21976	-5.61866	4.41621	6.25921
1.4884	2.27406	-0.65752	0.154497	2.22142	0.467205	0.676397	0.833475	2.74355	-1.53978	1.1888	0.879226	-0.23542	-0.40566	-2.73824				0.9516	6.26798	-1.65425	6.52457	1.03897	2.42723	0.456115	5.08071	5.34764	2.81876	3.61448	5.04471	-6.3709	4.61635	6.36648
																		0.976	6.449	-1.368	6.5758	1.03352	2.18635	0.463829	4.95682	5.7197	2.58158	3.64139	4.83992	-6.981	4.79296	6.46124
																		1.0004	6.6012	-1.07111	6.58121	1.01058	1.94923	0.454747	4.85268	6.04427	2.33846	3.66047	4.63749	-7.38907	4.94189	6.5616
																		1.0248	6.72712	-0.784087	6.55062	0.981242	1.72789	0.430447	4.77822	6.33166	2.11194	3.67096	4.46658	-7.54305	5.06039	6.68705
																		1.0492	6.81573	-0.523327	6.49768	0.958027	1.53129	0.393727	4.7332	6.58625	1.91787	3.6784	4.33649	-7.4049	5.14842	6.85462
																		1.0736	6.84895	-0.306095	6.43774	0.952387	1.36481	0.349119	4.70704	6.80714	1.76606	3.69173	4.23558	-6.95549	5.20872	7.07578
																		1.098	6.81512	-0.149954	6.38371	0.972646	1.23026	0.302088	4.68728	6.99647	1.65977	3.71623	4.14725	-6.1979	5.24564	7.3546
																		1.1224	6.71694	-0.0683755	6.34312	1.02324	1.12696	0.258901	4.66522	7.16276	1.59533	3.75121	4.06341	-5.1629	5.26344	7.68665
																		1.1468	6.56813	-0.0639002	6.3183	1.10516	1.05377	0.225266	4.63153	7.31794	1.56412	3.79314	3.98854	-3.91008	5.26498	8.05865
																		1.1712	6.38933	-0.12392	6.3078	1.21647	1.00972	0.204382	4.5771	7.47111	1.55542	3.83782	3.93809	-2.51712	5.25192	8.45034
																		1.1956	6.2071	-0.224379	6.30774	1.35125	0.993084	0.1962	4.50417	7.62586	1.55817	3.88093	3.93029	-1.06402	5.2259	8.83897
																		1.22	6.04862	-0.338797	6.31317	1.49797	1.00191	0.197415	4.43081	7.7831	1.56211	3.92004	3.97364	0.37914	5.18943	9.20327
																		1.2444	5.93426	-0.447341	6.31946	1.64021	1.03441	0.203474	4.37863	7.93866	1.55962	3.95534	4.06234	1.75531	5.1458	9.52548
																		1.2688	5.87488	-0.542183	6.32262	1.76061	1.08643	0.212037	4.35648	8.0814	1.54729	3.98626	4.17962	3.01441	5.09853	9.79254
																		1.2932	5.87312	-0.624331	6.31906	1.84606	1.1493	0.223056	4.36	8.20088	1.5263	4.0089	4.29739	4.10835	5.05064	9.99666
																		1.3176	5.92607	-0.696335	6.30554	1.89213	1.21184	0.235687	4.3812	8.29057	1.50154	4.01835	4.38373	4.99186	5.00409	10.1348
																		1.342	6.02656	-0.763729	6.27885	1.90447	1.26342	0.246653	4.40911	8.34432	1.47933	4.01287	4.42425	5.63117	4.9599	10.2081
																		1.3664	6.16158	-0.84105	6.23572	1.89496	1.29596	0.250577	4.42822	8.35756	1.46493	3.99541	4.42983	6.01443	4.91867	10.2209
																		1.3908	6.31304	-0.94826	6.17424	1.87429	1.30731	0.241558	4.42724	8.32971	1.46042	3.97266	4.41933	6.14954	4.88151	10.1803
																		1.4152	6.46417	-1.10071	6.09572	1.8473	1.30353	0.2157	4.41045	8.26483	1.46345	3.95132	4.40127	6.0568	4.85072	10.0946
																		1.4396	6.60516	-1.30182	6.0043	1.8134	1.29592	0.17259	4.39931	8.17247	1.46782	3.93299	4.36947	5.77216	4.82924	9.97199
																		1.464	6.73129	-1.53832	5.90408	1.76944	1.29432	0.115002	4.41711	8.06724	1.46515	3.91393	4.31113	5.35125	4.81933	9.8203
																		1.4884	6.83939	-1.78119	5.7966	1.71334	1.30249	0.0470166	4.46842	7.96798	1.44668	3.8917	4.22107	4.86091	4.82206	9.64734
																		1.5128	6.92763	-1.99724	5.68088	1.64726	1.31851	-0.0283187	4.53575	7.89442	1.40495	3.86846	4.10607	4.36483	4.83814	9.46129
																		1.5372	6.99503	-2.16385	5.55529	1.57771	1.33792	-0.109719	4.59304	7.85812	1.33616	3.84658	3.981	3.91519	4.86851	9.26973
																		1.5616	7.03936	-2.27277	5.41956	1.51162	1.35604	-0.197165	4.62078	7.85465	1.24103	3.82446	3.86744	3.55229	4.91372	9.07767
																		1.586	7.05726	-2.3231	5.27516	1.45239	1.36879	-0.290992	4.61141	7.86519	1.12415	3.7978	3.78909	3.30087	4.97337	8.88619
																		1.6104	7.0491	-2.31604	5.12431	1.39947	1.37237	-0.390581	4.56311	7.86638	0.993349	3.76333	3.76409	3.16171	5.04663	8.69316
																		1.6348	7.02246	-2.25563	4.9689	1.3507	1.36342	-0.494002	4.47864	7.84106	0.858567	3.72231	3.79465	3.10682	5.13242	8.49537
																		1.6592	6.9869	-2.14763	4.81061	1.30518	1.34031	-0.598819	4.37296	7.78036	0.729451	3.68132	3.8598	3.0831	5.22856	8.29019
																		1.6836	6.94557	-1.99644	4.65186	1.26467	1.30376	-0.701831	4.26799	7.67658	0.613133	3.64843	3.92542	3.02941	5.33101	8.0752
																		1.708	6.89354	-1.80657	4.49667	1.23309	1.25576	-0.797689	4.17607	7.51878	0.513511	3.62824	3.96076	2.89767	5.43449	7.84676
																		1.7324	6.82147	-1.58625	4.35055	1.21535	1.19903	-0.879784	4.09191	7.29619	0.431469	3.62228	3.94533	2.66206	5.5339	7.6002
																		1.7568	6.71956	-1.35117	4.21899	1.21571	1.13687	-0.942847	3.99491	7.00125	0.365735	3.6337	3.87196	2.32187	5.62545	7.33256
																		1.7812	6.58171	-1.12695	4.10561	1.23564	1.07138	-0.98326	3.85764	6.6308	0.314646	3.66972	3.75279	1.90301	5.70713	7.04676
																		1.8056	6.41006	-0.942194	4.01119	1.27266	1.00179	-0.997492	3.66284	6.19058	0.278134	3.7385	3.61775	1.44636	5.77808	6.75338
																		1.83	6.21475	-0.814833	3.93411	1.32171	0.925955	-0.98098	3.42061	5.6994	0.257866	3.84335	3.50004	0.98661	5.83718	6.46784
																		1.8544	6.01056	-0.745325	3.87178	1.37801	0.843985	-0.928454	3.16471	5.18821	0.255003	3.98119	3.42293	0.54658	5.88266	6.20541
																		1.8788	5.81495	-0.721711	3.82151	1.43944	0.760308	-0.836072	2.93141	4.69354	0.268218	4.14506	3.39515	0.151309	5.9136	5.977
																		1.9032	5.64346	-0.729545	3.78095	1.50764	0.682027	-0.703445	2.74821	4.24711	0.293735	4.32522	3.40846	-0.165411	5.93204	5.78673
																		1.9276	5.50349	-0.754711	3.74934	1.58762	0.615201	-0.534273	2.63395	3.86701	0.326154	4.50885	3.44036	-0.37404	5.94336	5.63223
																		1.952	5.39236	-0.779878	3.72808	1.68591	0.562037	-0.336238	2.59405	3.55581	0.359248	4.68099	3.46726	-0.461993	5.95508	5.50732
																		1.9764	5.29909	-0.787991	3.71938	1.80772	0.519667	-0.118393	2.61841	3.30578	0.38704	4.82701	3.47606	-0.429744	5.9751	5.40551
																		2.0008	5.21041	-0.772195	3.72437	1.95491	0.480838	0.113415	2.68929	3.1069	0.404941	4.93671	3.46126	-0.280074	6.00993	5.32227
																		2.0252	5.12154	-0.737325	3.74122	2.1258	0.436298	0.357845	2.78841	2.95131	0.410607	5.00787	3.42028	-0.0150094	6.06334	5.25484
																		2.0496	5.04133	-0.693043	3.76455	2.31525	0.376575	0.616133	2.90017	2.83143	0.403805	5.04532	3.36125	0.359515	6.13607	5.20084
																		2.074	4.98463	-0.649884	3.78782	2.51457	0.293557	0.890481	3.0115	2.73731	0.384829	5.05537	3.30506	0.826186	6.22643	5.15822
																		2.0984	4.9608	-0.615468	3.80817	2.71308	0.184405	1.18243	3.10818	2.66086	0.353432	5.04159	3.26844	1.34965	6.33177	5.12497
																		2.1228	4.96846	-0.588202	3.82905	2.90123	0.0544461	1.49134	3.17914	2.60184	0.310084	5.00595	3.25099	1.87821	6.44961	5.09778
																		2.1472	4.99776	-0.558888	3.85794	3.07292	-0.0856996	1.81365	3.22637	2.56826	0.257732	4.95273	3.24136	2.3593	6.57776	5.07147
																		2.1716	5.03786	-0.520851	3.90183	3.22612	-0.225529	2.14196	3.26546	2.56989	0.201587	4.88973	3.2274	2.75836	6.71348	5.04087
																		2.196	5.08253	-0.477243	3.96423	3.36227	-0.357208	2.46568	3.31572	2.60729	0.147105	4.82589	3.19886	3.06208	6.85272	5.00344
																		2.2204	5.12769	-0.439016	4.04343	3.48465	-0.475463	2.77419	3.38844	2.66549	0.0977874	4.76866	3.14884	3.26753	6.99044	4.96031
																		2.2448	5.1684	-0.414747	4.13162	3.59643	-0.577748	3.05982	3.48245	2.7177	0.0538995	4.72294	3.08228	3.37694	7.12195	4.91523
																		2.2692	5.20066	-0.402771	4.21704	3.69901	-0.665042	3.319	3.58728	2.73497	0.0126712	4.69069	3.02475	3.39844	7.24452	4.8729
																		2.2936	5.22289	-0.395136	4.28892	3.79055	-0.741712	3.55159	3.6892	2.69897	-0.0298709	4.67042	3.01235	3.3434	7.35768	4.83745
																		2.318	5.23727	-0.386503	4.34159	3.86642	-0.814614	3.75871	3.77827	2.61407	-0.0766012	4.65787	3.06457	3.23068	7.46183	4.81071
																		2.3424	5.25213	-0.376649	4.37531	3.92354	-0.891772	3.94178	3.85216	2.50581	-0.128114	4.64806	3.16604	3.0986	7.55682	4.79121
																		2.3668	5.28044	-0.365329	4.39409	3.96531	-0.979776	4.10342	3.91395	2.40277	-0.183166	4.63694	3.27223	2.99918	7.64201	4.77473
																		2.3912	5.33394	-0.344634	4.40306	4.0007	-1.08105	4.24716	3.96514	2.31628	-0.240517	4.62284	3.3347	2.97653	7.71642	4.75568
																		2.4156	5.41992	-0.299868	4.40656	4.03728	-1.19314	4.37584	4.00176	2.23311	-0.300557	4.60806	3.32774	3.06065	7.77829	4.72807
																		2.44	5.54073	-0.223175	4.40678	4.07608	-1.31026	4.49108	4.01887	2.1274	-0.364905	4.59932	3.2556	3.27372	7.82564	4.68598
																		2.4644	5.69108	-0.122372	4.40355	4.11265	-1.42643	4.59349	4.01094	1.98348	-0.434572	4.60393	3.1414	3.62227	7.85781	4.6237
																		2.4888	5.85632	-0.013788	4.39463	4.14179	-1.53887	4.68232	3.96452	1.80754	-0.508901	4.62403	3.01538	4.0789	7.87583	4.53624
																		2.5132	6.01565	0.0877205	4.37533	4.16076	-1.64935	4.75432	3.86009	1.62035	-0.586815	4.65584	2.90556	4.58036	7.88117	4.42046
																		2.5376	6.14896	0.17053	4.33983	4.16922	-1.76322	4.80322	3.68709	1.44375	-0.668702	4.6936	2.83087	5.04885	7.87433	4.27592
																		2.562	6.24476	0.224363	4.28521	4.16801	-1.88624	4.82261	3.45871	1.28939	-0.755392	4.73163	2.80368	5.4162	7.8542	4.10511
																		2.5864	6.30438	0.242192	4.21394	4.1586	-2.01967	4.81162	3.20972	1.15455	-0.845944	4.76367	2.8329	5.63887	7.81893	3.91301
																		2.6108	6.33905	0.224837	4.13204	4.14287	-2.15733	4.77683	2.97966	1.03149	-0.938703	4.78329	2.91662	5.70456	7.76804	3.70606
																		2.6352	6.36386	0.181615	4.04588	4.12283	-2.28817	4.72699	2.7996	0.921483	-1.03393	4.7848	3.03506	5.62799	7.70423	3.49064
																		2.6596	6.39344	0.124916	3.96149	4.10163	-2.40233	4.66664	2.68735	0.838189	-1.13436	4.7619	3.15756	5.44319	7.63279	3.27266
																		2.684	6.44172	0.063411	3.88431	4.08505	-2.4956	4.59416	2.64538	0.798711	-1.2437	4.70836	3.25936	5.20036	7.55906	3.05883
																		2.7084	6.52369	0.000181637	3.81738	4.0804	-2.56948	4.50425	2.66306	0.811603	-1.3644	4.62269	3.33375	4.95964	7.48643	2.85761
																		2.7328	6.65119	-0.063545	3.7593	4.09277	-2.62854	4.39242	2.72734	0.871484	-1.49577	4.51118	3.39214	4.77867	7.41605	2.67774
																		2.7572	6.82368	-0.124823	3.7052	4.12309	-2.67784	4.25662	2.8305	0.964024	-1.63371	4.38549	3.45195	4.69895	7.3465	2.52487
																		2.7816	7.02743	-0.179419	3.64982	4.16966	-2.72089	4.09485	2.96088	1.07284	-1.77151	4.25792	3.51867	4.73192	7.27278	2.39981
																		2.806	7.2449	-0.224035	3.5901	4.23046	-2.75624	3.90458	3.09299	1.18164	-1.90091	4.13849	3.5758	4.8556	7.18716	2.2994
																		2.8304	7.45965	-0.257835	3.52599	4.30378	-2.77509	3.68622	3.19981	1.27625	-2.01365	4.0331	3.59347	5.03279	7.08344	2.21852
																		2.8548	7.65291	-0.280082	3.45966	4.38745	-2.76614	3.44613	3.27183	1.34864	-2.10348	3.94236	3.54801	5.2326	6.9599	2.15181
																		2.8792	7.80536	-0.282933	3.39359	4.47787	-2.72533	3.19549	3.31804	1.39849	-2.16724	3.86333	3.43773	5.43505	6.81793	2.09474
																		2.9036	7.90654	-0.247699	3.32848	4.56941	-2.66065	2.94661	3.35364	1.43148	-2.2044	3.79122	3.28955	5.62699	6.65924	2.04463
																		2.928	7.9607	-0.151287	3.26271	4.65339	-2.58821	2.71019	3.39024	1.45557	-2.21636	3.71846	3.14783	5.80123	6.485	2.00187
																		2.9524	7.98456	0.0209504	3.19307	4.71853	-2.52455	2.49424	3.4323	1.47441	-2.20686	3.63526	3.04708	5.95746	6.29621	1.96947
																		2.9768	7.99976	0.267338	3.11647	4.75383	-2.48053	2.30327	3.47767	1.48361	-2.18201	3.53546	2.99837	6.10149	6.09405	1.94998
																		3.0012	8.02207	0.57133	3.03243	4.75199	-2.45894	2.13626	3.51794	1.47635	-2.1492	3.42115	2.99448	6.24361	5.88059	1.9434
																		3.0256	8.05249	0.902837	2.9445	4.71088	-2.45483	1.98532	3.53566	1.45054	-2.11566	3.29977	3.01055	6.39621	5.65959	1.94819
																		3.05	8.0755	1.21938	2.85933	4.63328	-2.45735	1.8393	3.50757	1.40522	-2.08719	3.17694	3.00863	6.56758	5.43628	1.96242
																		3.0744	8.06753	1.47493	2.78426	4.52552	-2.45219	1.69067	3.42071	1.33388	-2.06742	3.05155	2.95777	6.75278	5.21634	1.98318
																		3.0988	8.01472	1.63243	2.72524	4.39587	-2.42525	1.53882	3.28509	1.22781	-2.05704	2.91795	2.85202	6.9314	5.00488	2.00655
																		3.1232	7.92462	1.67322	2.68543	4.25335	-2.36704	1.38776	3.12316	1.08397	-2.05335	2.77202	2.70745	7.07495	4.80564	2.02898
																		3.1476	7.81795	1.60305	2.66463	4.10589	-2.27532	1.24384	2.94905	0.908653	-2.05122	2.6132	2.54166	7.15763	4.62074	2.0482
																		3.172	7.71039	1.45314	2.65986	3.95845	-2.15395	1.11569	2.76324	0.717592	-2.04516	2.44295	2.36098	7.16985	4.45058	2.06355
																		3.1964	7.60239	1.26987	2.66634	3.81266	-2.00912	1.01283	2.56214	0.533178	-2.03106	2.26369	2.16616	7.13166	4.29423	2.07586
																		3.2208	7.48264	1.09535	2.67895	3.66823	-1.84726	0.942598	2.34624	0.377125	-2.00706	2.07857	1.95951	7.08745	4.15031	2.08594
																		3.2452	7.33916	0.952861	2.693	3.52443	-1.67551	0.908644	2.12072	0.262319	-1.97331	1.89199	1.7483	7.07623	4.01734	2.09282
																		3.2696	7.16882	0.847142	2.7036	3.38109	-1.50112	0.912094	1.88988	0.190722	-1.93156	1.71153	1.55157	7.10928	3.89286	2.09418
																		3.294	6.98182	0.773914	2.70568	3.23873	-1.32879	0.952592	1.65	0.155298	-1.88569	1.54864	1.39829	7.17773	3.77315	2.08703
																		3.3184	6.80198	0.725206	2.69509	3.0982	-1.15951	1.0264	1.39378	0.141889	-1.84198	1.41378	1.3083	7.26713	3.65471	2.06759
																		3.3428	6.6626	0.689214	2.66905	2.96038	-0.991308	1.12319	1.1291	0.13463	-1.80776	1.30847	1.27585	7.36069	3.53567	2.03221
																		3.3672	6.59769	0.653605	2.62568	2.82568	-0.821848	1.22703	0.886503	0.123889	-1.7891	1.22308	1.27557	7.44279	3.41534	1.97916
																		3.3916	6.63096	0.612101	2.56404	2.69375	-0.651403	1.32176	0.703179	0.109853	-1.789	1.14361	1.28234	7.50984	3.29369	1.90912
																		3.416	6.76857	0.566924	2.48466	2.56412	-0.483059	1.39541	0.6074	0.0990777	-1.80623	1.0606	1.27848	7.57628	3.17173	1.82477
																		3.4404	7.00157	0.525403	2.3902	2.43767	-0.321131	1.44123	0.611635	0.0965125	-1.83569	0.971698	1.24572	7.66684	3.05118	1.73134
																		3.4648	7.31387	0.494149	2.28655	2.31719	-0.171571	1.45762	0.704127	0.0985205	-1.87104	0.878469	1.16672	7.80196	2.93345	1.63719
																		3.4892	7.68602	0.473826	2.18255	2.20729	-0.0433977	1.44755	0.846148	0.0926428	-1.9074	0.782836	1.04071	7.98358	2.8186	1.55265
																		3.5136	8.09291	0.457613	2.08742	2.11394	0.0515435	1.41697	0.987319	0.0648791	-1.94151	0.685597	0.892121	8.18659	2.70479	1.48699
																		3.538	8.50321	0.435504	2.00808	2.04225	0.101317	1.37288	1.09049	0.00781463	-1.97096	0.586169	0.760321	8.36398	2.58855	1.44598
																		3.5624	8.88569	0.402387	1.94785	1.99333	0.0983595	1.32107	1.1434	-0.0752175	-1.99405	0.483229	0.677693	8.46444	2.46658	1.43198
																		3.5868	9.21807	0.36414	1.90741	1.96402	0.0430325	1.26527	1.15105	-0.170598	-2.00893	0.375796	0.653527	8.44655	2.33748	1.44601
																		3.6112	9.49176	0.336846	1.88758	1.95065	-0.0550278	1.2089	1.12482	-0.258741	-2.01231	0.264484	0.673709	8.28118	2.20177	1.48882
																		3.6356	9.70959	0.340072	1.89053	1.95193	-0.178558	1.15607	1.07557	-0.317559	-1.99979	0.151986	0.708393	7.95337	2.06057	1.55954
																		3.66	9.87783	0.388701	1.91805	1.96743	-0.30889	1.11092	1.00939	-0.326759	-1.96816	0.0414119	0.723684	7.47272	1.91533	1.65431
																		3.6844	9.99837	0.488731	1.96917	1.99474	-0.43316	1.07721	0.931187	-0.27789	-1.91788	-0.0660957	0.69976	6.88286	1.76885	1.76676
																		3.7088	10.0703	0.639544	2.03967	2.02958	-0.546076	1.05552	0.85121	-0.181003	-1.85317	-0.172501	0.642209	6.25591	1.62609	1.88909
																		3.7332	10.0986	0.836336	2.12302	2.06776	-0.646122	1.03955	0.781298	-0.0593775	-1.77962	-0.282492	0.570316	5.67355	1.49352	2.01325
																		3.7576	10.0982	1.06738	2.21164	2.10613	-0.731733	1.01734	0.723102	0.0597686	-1.70192	-0.40068	0.495629	5.20424	1.37775	2.13267
																		3.782	10.0889	1.31125	2.29821	2.1428	-0.800482	0.976454	0.667395	0.152609	-1.62355	-0.52665	0.418518	4.88699	1.28397	2.24393
																		3.8064	10.087	1.54121	2.37695	2.17712	-0.848853	0.907516	0.609991	0.204027	-1.54776	-0.652853	0.335159	4.72991	1.21431	2.34649
																		3.8308	10.1007	1.73432	2.44445	2.20928	-0.871421	0.805749	0.557981	0.207998	-1.47756	-0.768718	0.237774	4.71778	1.16686	2.44101
																		3.8552	10.1305	1.87635	2.49951	2.23909	-0.862387	0.671595	0.516858	0.164969	-1.41453	-0.866249	0.120363	4.81792	1.1361	2.52844
																		3.8796	10.173	1.9641	2.54201	2.26491	-0.819064	0.509563	0.484368	0.0818416	-1.35864	-0.94194	-0.010863	4.98654	1.11449	2.61024
																		3.904	10.2213	2.008	2.57185	2.28418	-0.743483	0.326544	0.455069	-0.0258285	-1.31018	-0.995664	-0.138308	5.17992	1.09403	2.68854
																		3.9284	10.2583	2.02798	2.5892	2.29503	-0.641691	0.130435	0.421736	-0.138297	-1.27188	-1.02915	-0.244733	5.36419	1.06768	2.76542
																		3.9528	10.2545	2.04351	2.59625	2.29693	-0.522798	-0.0722164	0.378238	-0.241416	-1.24781	-1.04601	-0.323864	5.51578	1.03039	2.84177
																		3.9772	10.1785	2.07048	2.59729	2.2904	-0.398628	-0.277713	0.32495	-0.326885	-1.24025	-1.05398	-0.376225	5.61929	0.980012	2.91683
																		4.0016	10.0103	2.12203	2.59672	2.27627	-0.2822	-0.483238	0.267573	-0.385804	-1.24842	-1.0659	-0.399755	5.67231	0.918026	2.98857
																		4.026	9.75107	2.20435	2.59724	2.2545	-0.184082	-0.684722	0.210664	-0.408268	-1.26973	-1.09427	-0.391666	5.69016	0.849147	3.05501
																		4.0504	9.42321	2.31153	2.59945	2.22392	-0.109383	-0.878026	0.152265	-0.385049	-1.30035	-1.14355	-0.351889	5.70107	0.780096	3.11535
																		4.0748	9.05932	2.42643	2.60254	2.18425	-0.0574383	-1.06077	0.0865139	-0.307422	-1.33477	-1.21023	-0.282213	5.73134	0.718045	3.17015
																		4.0992	8.69071	2.52944	2.60518	2.13804	-0.0240048	-1.23207	0.0116484	-0.171571	-1.36638	-1.28831	-0.189307	5.79198	0.669503	3.22074
																		4.1236	8.34218	2.60977	2.60608	2.09056	-0.00482253	-1.39122	-0.0756008	0.0136904	-1.38902	-1.37174	-0.0871368	5.88023	0.640289	3.26903
																		4.148	8.03102	2.66828	2.60469	2.04851	0.00223943	-1.53719	-0.190716	0.22297	-1.39783	-1.45378	0.0090065	5.98671	0.636311	3.31839
																		4.1724	7.76715	2.71135	2.6024	2.01808	-0.00229291	-1.66963	-0.349285	0.41882	-1.3893	-1.52786	0.088807	6.09512	0.663429	3.37351
																		4.1968	7.54949	2.74402	2.60294	2.00326	-0.0181655	-1.79076	-0.546156	0.568614	-1.36133	-1.59111	0.148419	6.17786	0.725336	3.43888
																		4.2212	7.3621	2.76731	2.61135	2.00551	-0.0444319	-1.90543	-0.752845	0.661478	-1.31343	-1.646	0.188788	6.19823	0.820958	3.51783
																		4.2456	7.18276	2.78223	2.63192	2.02433	-0.0789831	-2.01742	-0.931736	0.705274	-1.24733	-1.69595	0.205967	6.12388	0.94335	3.61248
																		4.27	7.00066	2.79542	2.66675	2.05813	-0.118875	-2.12722	-1.05399	0.710519	-1.16756	-1.74059	0.187281	5.94111	1.0806	3.72331
																		4.2944	6.82509	2.81863	2.71624	2.1053	-0.16101	-2.2346	-1.10845	0.682182	-1.0809	-1.77672	0.12639	5.65773	1.21833	3.84817
																		4.3188	6.67821	2.86284	2.78021	2.16415	-0.202741	-2.33987	-1.10055	0.622488	-0.994952	-1.80179	0.0339937	5.29833	1.34322	3.98241
																		4.3432	6.58057	2.93119	2.85847	2.23138	-0.242578	-2.44124	-1.05028	0.536556	-0.917096	-1.81639	-0.0689946	4.89605	1.44636	4.11979
																		4.3676	6.54186	3.01418	2.95084	2.30052	-0.280318	-2.53386	-0.986421	0.434879	-0.853283	-1.82482	-0.163047	4.48425	1.52464	4.25363
																		4.392	6.56135	3.09205	3.05674	2.36281	-0.315776	-2.61256	-0.932195	0.330989	-0.806521	-1.83265	-0.2401	4.09308	1.5796	4.37799
																		4.4164	6.63478	3.14329	3.17475	2.40996	-0.347566	-2.67426	-0.895184	0.234756	-0.776311	-1.84422	-0.303548	3.748	1.61467	4.48846
																		4.4408	6.76021	3.15161	3.30286	2.43625	-0.372961	-2.71742	-0.871807	0.146392	-0.759657	-1.86379	-0.353713	3.46985	1.63268	4.5821
																		4.4652	6.93554	3.11013	3.43946	2.43897	-0.387706	-2.74119	-0.853988	0.0604281	-0.752669	-1.89643	-0.379926	3.27775	1.63468	4.65733
																		4.4896	7.15054	3.02322	3.5836	2.41803	-0.387154	-2.74589	-0.828065	-0.0248999	-0.752021	-1.9445	-0.369096	3.18585	1.6205	4.71473
																		4.514	7.38355	2.90283	3.73341	2.37528	-0.369592	-2.73344	-0.775704	-0.104585	-0.755717	-2.00428	-0.314715	3.19474	1.59013	4.75753
																		4.5384	7.60532	2.76238	3.88488	2.31387	-0.337562	-2.70765	-0.685099	-0.170447	-0.762805	-2.06667	-0.221328	3.28951	1.54468	4.79105
																		4.5628	7.78877	2.61434	4.03295	2.2383	-0.295485	-2.674	-0.563014	-0.217568	-0.773057	-2.12112	-0.106002	3.44739	1.48622	4.82127
																		4.5872	7.921	2.46853	4.17408	2.1553	-0.24773	-2.63771	-0.431296	-0.246972	-0.786654	-2.16049	0.00600936	3.64658	1.41746	4.85311
																		4.6116	8.00509	2.32863	4.30717	2.07396	-0.198673	-2.60236	-0.31129	-0.261874	-0.802935	-2.18435	0.086089	3.86591	1.34177	4.88916
																		4.636	8.04911	2.19185	4.43224	2.00417	-0.152601	-2.57101	-0.21629	-0.267002	-0.819483	-2.19963	0.107196	4.08204	1.26342	4.929
																		4.6604	8.05552	2.05319	4.54879	1.95372	-0.112401	-2.54637	-0.153278	-0.273884	-0.832929	-2.21732	0.055442	4.27714	1.18765	4.96937
																		4.6848	8.02047	1.91018	4.65561	1.92578	-0.0775685	-2.52912	-0.12216	-0.301936	-0.840434	-2.24608	-0.0570371	4.44509	1.12038	5.00695
																		4.7092	7.93983	1.76459	4.75237	1.91862	-0.0431643	-2.51857	-0.118413	-0.36919	-0.840199	-2.28872	-0.192583	4.58977	1.06729	5.04309
																		4.7336	7.81493	1.62133	4.84134	1.92673	-0.000945254	-2.51473	-0.14296	-0.478987	-0.831352	-2.34391	-0.310803	4.72565	1.03227	5.08456
																		4.758	7.65505	1.48798	4.92783	1.94166	0.0577602	-2.51824	-0.203047	-0.616071	-0.81523	-2.40821	-0.393588	4.87717	1.01614	5.13857
																		4.7824	7.47638	1.37569	5.01894	1.95342	0.139428	-2.5301	-0.300175	-0.756721	-0.796795	-2.47571	-0.44477	5.06808	1.01608	5.20813
																		4.8068	7.29744	1.29795	5.12077	1.9529	0.247322	-2.55149	-0.421346	-0.881229	-0.783323	-2.53831	-0.477078	5.30884	1.02597	5.2917
																		4.8312	7.13409	1.26551	5.23608	1.93369	0.381634	-2.57985	-0.543529	-0.978903	-0.781649	-2.58805	-0.503055	5.59419	1.03829	5.38544
																		4.8556	6.99243	1.28213	5.36364	1.89235	0.541008	-2.60438	-0.648189	-1.04839	-0.795808	-2.62098	-0.528595	5.90604	1.04692	5.48501
																		4.88	6.86234	1.34772	5.49865	1.82881	0.72464	-2.60989	-0.729728	-1.09511	-0.825344	-2.63955	-0.556067	6.21655	1.04901	5.58618
																		4.9044	6.72479	1.46285	5.6338	1.74739	0.932044	-2.58695	-0.785979	-1.12349	-0.866085	-2.65027	-0.585943	6.49712	1.0448	5.68517
																		4.9288	6.56961	1.62366	5.76135	1.65687	1.15995	-2.53633	-0.807811	-1.13081	-0.912832	-2.65823	-0.606616	6.72642	1.03565	5.77905
																		4.9532	6.40391	1.81468	5.87489	1.5688	1.39959	-2.46463	-0.786515	-1.11322	-0.960601	-2.66441	-0.595615	6.88385	1.02175	5.86658
																		4.9776	6.2467	2.01138	5.96974	1.49419	1.63901	-2.37952	-0.729816	-1.07506	-1.00499	-2.66801	-0.5372	6.94338	1.00108	5.94903
																		5.002	6.11945	2.18846	6.04226	1.44057	1.8702	-2.28845	-0.664027	-1.02595	-1.0429	-2.66905	-0.436725	6.88638	0.969752	6.0306

## Sheet: Figure 7B
					Cue (VTA)											Action + Footshock (VTA)
	Session	Saline	Saline	Saline	Saline	Diazepam	Diazepam	Diazepam	Diazepam			Session	Saline	Saline	Saline	Saline	Diazepam	Diazepam	Diazepam	Diazepam
	Subject	S256	S251	S252	S320	S256	S320	S251	S252			Subject	S256	S251	S252	S320	S256	S320	S251	S252
	Peri-cue time - sec											Peri-action time -sec
	-1.5128	0.29393	-0.16832	-0.91475	-0.36142	-0.83018	-0.56167	-0.12021	-0.78857			-2.0496	-1.71022	-0.849556	-0.203287	-0.0673367	0.490344	0.166424	-0.176781	0.311189
	-1.4884	0.300096	-0.44615	-0.96672	-0.43043	-0.74663	-0.50927	-0.17984	-0.83723			-2.0252	-1.77957	-0.904028	-0.162548	0.058672	0.570807	0.183883	-0.106459	0.354575
	-1.464	0.26624	-0.77423	-1.01756	-0.48352	-0.67554	-0.44145	-0.24464	-0.87824			-2.0008	-1.79609	-0.945935	-0.0697997	0.182301	0.639337	0.207232	-0.0491094	0.387266
	-1.4396	0.185459	-1.14729	-1.06547	-0.51941	-0.61424	-0.37109	-0.31703	-0.91155			-1.9764	-1.76035	-0.975569	0.0677089	0.271009	0.696452	0.229545	-0.0238987	0.41352
	-1.4152	0.060261	-1.54578	-1.10712	-0.55053	-0.56131	-0.30899	-0.39896	-0.94064			-1.952	-1.68483	-0.997437	0.239584	0.308058	0.750266	0.243689	-0.0389742	0.438245
	-1.3908	-0.09621	-1.94048	-1.1389	-0.58057	-0.5204	-0.25933	-0.48881	-0.97018			-1.9276	-1.58772	-1.01975	0.434587	0.294446	0.811597	0.247917	-0.0856139	0.464554
	-1.3664	-0.26251	-2.29937	-1.15881	-0.59354	-0.49851	-0.22337	-0.58012	-1.00277			-1.9032	-1.48267	-1.05072	0.641513	0.238662	0.885739	0.24908	-0.143167	0.492435
	-1.342	-0.41769	-2.59231	-1.16711	-0.57266	-0.49831	-0.19973	-0.66198	-1.03806			-1.8788	-1.37565	-1.09588	0.850041	0.152475	0.96939	0.266535	-0.189997	0.518134
	-1.3176	-0.54972	-2.79767	-1.16576	-0.52541	-0.51388	-0.18424	-0.72425	-1.0733			-1.8544	-1.26752	-1.15615	1.05248	0.0567996	1.05316	0.32304	-0.21264	0.535499
	-1.2932	-0.65738	-2.91313	-1.1577	-0.48272	-0.53394	-0.16957	-0.76465	-1.10415			-1.83	-1.156	-1.22709	1.24428	-0.0191036	1.12494	0.421134	-0.209272	0.53934
	-1.2688	-0.74818	-2.96067	-1.14643	-0.4707	-0.54764	-0.1418	-0.78869	-1.12676			-1.8056	-1.03783	-1.30013	1.42156	-0.046543	1.17389	0.537066	-0.186896	0.528321
	-1.2444	-0.83303	-2.97504	-1.13559	-0.48851	-0.54851	-0.08636	-0.80369	-1.14015			-1.7812	-0.913126	-1.36371	1.57943	-0.00595064	1.19528	0.643806	-0.153998	0.505758
	-1.22	-0.91845	-2.98625	-1.1286	-0.51944	-0.53565	-0.0033	-0.81325	-1.14625			-1.7568	-0.791047	-1.40715	1.71373	0.103477	1.19274	0.730714	-0.114372	0.478314
	-1.1956	-1.00454	-3.0113	-1.1284	-0.55293	-0.5125	0.091689	-0.8156	-1.14814			-1.7324	-0.690557	-1.42752	1.82346	0.263229	1.17552	0.801266	-0.0665454	0.453561
	-1.1712	-1.08877	-3.05461	-1.13563	-0.58413	-0.48533	0.183573	-0.80643	-1.14922			-1.708	-0.629508	-1.43022	1.91071	0.448111	1.15267	0.863804	-0.00720742	0.437696
	-1.1468	-1.16409	-3.11072	-1.14582	-0.60161	-0.46052	0.269732	-0.78384	-1.15262			-1.6836	-0.611496	-1.42258	1.97839	0.633822	1.12908	0.929924	0.0642389	0.434437
	-1.1224	-1.21528	-3.16662	-1.14912	-0.5906	-0.44087	0.354367	-0.75196	-1.15924			-1.6592	-0.6254	-1.40969	2.02701	0.796024	1.10449	1.01318	0.14217	0.445775
	-1.098	-1.22693	-3.20577	-1.13422	-0.54634	-0.42471	0.43339	-0.71953	-1.16644			-1.6348	-0.653195	-1.39371	2.05258	0.914629	1.07665	1.11541	0.21478	0.473295
	-1.0736	-1.19412	-3.21387	-1.09559	-0.47901	-0.40898	0.490048	-0.69449	-1.17023			-1.6104	-0.676361	-1.37537	2.04959	0.982263	1.0483	1.21598	0.268253	0.517426
	-1.0492	-1.12125	-3.18268	-1.0392	-0.41016	-0.39266	0.506794	-0.68005	-1.1689			-1.586	-0.681709	-1.35578	2.01733	1.0053	1.0279	1.28286	0.293155	0.575444
	-1.0248	-1.01624	-3.10982	-0.98111	-0.36178	-0.37649	0.477108	-0.67372	-1.16437			-1.5616	-0.66556	-1.33626	1.9636	0.994831	1.02136	1.29184	0.289346	0.642088
	-1.0004	-0.88803	-2.99633	-0.93892	-0.34221	-0.36013	0.406214	-0.66819	-1.16134			-1.5372	-0.632106	-1.31806	1.90429	0.95549	1.02761	1.23398	0.265372	0.713089
	-0.976	-0.7471	-2.84688	-0.92252	-0.34508	-0.34148	0.303216	-0.65553	-1.16515			-1.5128	-0.588028	-1.30162	1.85991	0.882377	1.04185	1.11098	0.23333	0.787797
	-0.9516	-0.60918	-2.67143	-0.93127	-0.35868	-0.31819	0.176457	-0.63395	-1.17913			-1.4884	-0.538876	-1.28563	1.84807	0.768116	1.05793	0.933503	0.204351	0.867998
	-0.9272	-0.4969	-2.48521	-0.95788	-0.37146	-0.29039	0.039182	-0.61103	-1.20321			-1.464	-0.487872	-1.26982	1.87393	0.617917	1.06839	0.725687	0.186608	0.954457
	-0.9028	-0.43131	-2.30753	-0.99445	-0.37641	-0.26212	-0.08889	-0.59916	-1.23474			-1.4396	-0.436501	-1.25694	1.92703	0.462536	1.06577	0.518977	0.185228	1.04561
	-0.8784	-0.41926	-2.15988	-1.0352	-0.373	-0.23736	-0.1907	-0.60729	-1.27031			-1.4152	-0.386085	-1.24992	1.98919	0.348295	1.04469	0.33531	0.204206	1.13943
	-0.854	-0.44998	-2.06209	-1.07522	-0.35857	-0.21395	-0.25761	-0.63579	-1.30728			-1.3908	-0.335235	-1.24965	2.04654	0.305252	1.00366	0.177427	0.248631	1.23512
	-0.8296	-0.50391	-2.02795	-1.10886	-0.32293	-0.18481	-0.28819	-0.67641	-1.34398			-1.3664	-0.276053	-1.25759	2.09504	0.320914	0.946997	0.0368452	0.324128	1.33309
	-0.8052	-0.56309	-2.06112	-1.13035	-0.25913	-0.14637	-0.28469	-0.7175	-1.379			-1.342	-0.199616	-1.27637	2.13711	0.34906	0.884199	-0.0848195	0.433403	1.43418
	-0.7808	-0.61297	-2.15161	-1.13562	-0.17272	-0.10274	-0.25029	-0.75113	-1.41116			-1.3176	-0.10566	-1.30445	2.17399	0.352478	0.826843	-0.169938	0.572643	1.53907
	-0.7564	-0.64179	-2.27859	-1.12402	-0.07732	-0.05964	-0.19446	-0.77627	-1.44021			-1.2932	-0.00404585	-1.3328	2.20063	0.332364	0.787167	-0.207672	0.730525	1.64677
	-0.732	-0.64714	-2.41912	-1.09983	0.012617	-0.01835	-0.13904	-0.79663	-1.46739			-1.2688	0.0900373	-1.34975	2.20769	0.314137	0.775441	-0.211849	0.891564	1.75349
	-0.7076	-0.63952	-2.55406	-1.07208	0.08426	0.02215	-0.10937	-0.81564	-1.49532			-1.2444	0.161374	-1.34747	2.18836	0.314786	0.795047	-0.212595	1.04193	1.85324
	-0.6832	-0.63335	-2.6679	-1.05104	0.130194	0.060875	-0.11768	-0.83227	-1.52729			-1.22	0.198483	-1.3239	2.14291	0.326992	0.842429	-0.239405	1.17302	1.93975
	-0.6588	-0.63912	-2.74675	-1.04286	0.150639	0.095497	-0.15245	-0.8417	-1.56605			-1.1956	0.19364	-1.2837	2.07746	0.330259	0.91143	-0.312169	1.28174	2.00762
	-0.6344	-0.66386	-2.77921	-1.04592	0.145477	0.124783	-0.18367	-0.83968	-1.6119			-1.1712	0.142656	-1.23777	1.99857	0.313779	0.99551	-0.440601	1.36849	2.05336
	-0.61	-0.71029	-2.75808	-1.05243	0.109911	0.148648	-0.18612	-0.82552	-1.66118			-1.1468	0.0485091	-1.19694	1.90741	0.282674	1.08566	-0.621398	1.43296	2.07736
	-0.5856	-0.77501	-2.67949	-1.05337	0.046731	0.168031	-0.15762	-0.80316	-1.70738			-1.1224	-0.0766213	-1.16535	1.79795	0.243571	1.16763	-0.831836	1.47213	2.08525
	-0.5612	-0.85259	-2.54434	-1.04283	-0.02397	0.184554	-0.11369	-0.78073	-1.74395			-1.098	-0.2179	-1.14053	1.66151	0.201325	1.22706	-1.03409	1.48425	2.08539
	-0.5368	-0.94341	-2.36408	-1.01996	-0.0735	0.197526	-0.0713	-0.7666	-1.7665			-1.0736	-0.366113	-1.11679	1.49411	0.169927	1.26139	-1.18939	1.47342	2.08391
	-0.5124	-1.0526	-2.16111	-0.98863	-0.08449	0.202425	-0.0389	-0.76413	-1.77407			-1.0492	-0.5147	-1.08853	1.301	0.169557	1.28252	-1.26956	1.44909	2.08278
	-0.488	-1.17746	-1.95919	-0.95513	-0.0656	0.194307	-0.01696	-0.77017	-1.76947			-1.0248	-0.651945	-1.05197	1.09607	0.213111	1.30567	-1.26155	1.4213	2.08191
	-0.4636	-1.30289	-1.77399	-0.92586	-0.03822	0.171863	-0.00198	-0.77677	-1.75778			-1.0004	-0.763534	-1.00622	0.896633	0.297086	1.33908	-1.168	1.3959	2.08202
	-0.4392	-1.41209	-1.61169	-0.9061	-0.00802	0.13875	0.012247	-0.77451	-1.74387			-0.976	-0.840809	-0.955345	0.716812	0.403448	1.38413	-1.00928	1.37254	2.08638
	-0.4148	-1.49543	-1.47215	-0.89937	0.037458	0.102403	0.029828	-0.75833	-1.73084			-0.9516	-0.883607	-0.906511	0.565733	0.513115	1.44075	-0.81966	1.34635	2.10125
	-0.3904	-1.54979	-1.35205	-0.90672	0.113662	0.070955	0.043792	-0.73137	-1.71987			-0.9272	-0.898353	-0.865641	0.450942	0.617573	1.50895	-0.633525	1.31248	2.13354
	-0.366	-1.57409	-1.24714	-0.92596	0.231223	0.050844	0.037947	-0.70248	-1.71103			-0.9028	-0.893873	-0.836679	0.37935	0.722946	1.58733	-0.475215	1.27005	2.18667
	-0.3416	-1.56645	-1.15319	-0.95141	0.38966	0.045538	-0.00118	-0.67995	-1.70374			-0.8784	-0.875673	-0.820915	0.352605	0.842973	1.67431	-0.35519	1.22319	2.25864
	-0.3172	-1.52546	-1.06928	-0.97523	0.576619	0.054177	-0.07708	-0.66662	-1.69699			-0.854	-0.841994	-0.81482	0.363892	0.981734	1.77011	-0.268048	1.17965	2.34463
	-0.2928	-1.45154	-1.00254	-0.98985	0.771593	0.07238	-0.17891	-0.66066	-1.69056			-0.8296	-0.785227	-0.811926	0.401591	1.12813	1.87561	-0.198522	1.14773	2.44024
	-0.2684	-1.3475	-0.96495	-0.99012	0.940169	0.096131	-0.28198	-0.66123	-1.68612			-0.8052	-0.698617	-0.80745	0.455132	1.26727	1.98949	-0.13149	1.13248	2.54228
	-0.244	-1.22146	-0.96288	-0.97452	1.03305	0.124826	-0.36295	-0.67169	-1.6861			-0.7808	-0.583317	-0.800545	0.516657	1.39002	2.10617	-0.0572455	1.13304	2.64783
	-0.2196	-1.08868	-0.99177	-0.94447	1.00932	0.16035	-0.4155	-0.69779	-1.6914			-0.7564	-0.450487	-0.791981	0.579269	1.49511	2.21711	0.027239	1.14427	2.75293
	-0.1952	-0.96826	-1.04076	-0.9031	0.867154	0.203447	-0.44699	-0.74462	-1.70071			-0.732	-0.317042	-0.779296	0.636345	1.58793	2.31488	0.120915	1.16167	2.85167
	-0.1708	-0.87609	-1.10123	-0.8544	0.650383	0.250665	-0.46614	-0.81279	-1.71241			-0.7076	-0.198933	-0.755242	0.682772	1.67317	2.39563	0.22185	1.18422	2.93722
	-0.1464	-0.81835	-1.17071	-0.80199	0.426223	0.296249	-0.4794	-0.89394	-1.72676			-0.6832	-0.107315	-0.711619	0.715005	1.74609	2.45853	0.327508	1.21368	3.00404
	-0.122	-0.79246	-1.24993	-0.74763	0.253066	0.338588	-0.49273	-0.97146	-1.74541			-0.6588	-0.0472594	-0.64438	0.728979	1.7987	2.50471	0.436773	1.2515	3.04874
	-0.0976	-0.79222	-1.33765	-0.69114	0.158851	0.38213	-0.51036	-1.02882	-1.76998			-0.6344	-0.0180747	-0.556387	0.719619	1.8305	2.5371	0.554323	1.29603	3.06973
	-0.0732	-0.80979	-1.42878	-0.63245	0.141294	0.431522	-0.53304	-1.05707	-1.80111			-0.61	-0.0152895	-0.457037	0.683693	1.84277	2.55879	0.690611	1.34166	3.06769
	-0.0488	-0.83599	-1.51678	-0.57388	0.179021	0.485514	-0.55974	-1.05475	-1.83745			-0.5856	-0.0318434	-0.358962	0.622556	1.8318	2.57431	0.855639	1.38029	3.04638
	-0.0244	-0.86204	-1.59544	-0.52023	0.238379	0.536913	-0.58993	-1.02332	-1.8748			-0.5612	-0.0593846	-0.274088	0.542959	1.7938	2.59339	1.05303	1.40514	3.01163
	0	-0.88319	-1.65843	-0.47723	0.286389	0.577146	-0.62289	-0.96366	-1.90588			-0.5368	-0.0909006	-0.210781	0.456411	1.72661	2.62849	1.27901	1.41513	2.96828
	0.0244	-0.90181	-1.69987	-0.44992	0.310129	0.599241	-0.6613	-0.87518	-1.92177			-0.5124	-0.121471	-0.170585	0.375311	1.62812	2.68723	1.52068	1.41541	2.91762
	0.0488	-0.92577	-1.71434	-0.44157	0.31848	0.597975	-0.7136	-0.75815	-1.91526			-0.488	-0.147104	-0.146099	0.307402	1.50172	2.76625	1.7536	1.41317	2.85792
	0.0732	-0.96072	-1.69752	-0.453	0.327442	0.570037	-0.78108	-0.61767	-1.88363			-0.4636	-0.165621	-0.124314	0.25524	1.3607	2.85206	1.94877	1.41268	2.78642
	0.0976	-1.00139	-1.65025	-0.48169	0.349707	0.512816	-0.84956	-0.46463	-1.8283			-0.4392	-0.17712	-0.0925403	0.220593	1.22237	2.93133	2.08596	1.41271	2.69963
	0.122	-1.0335	-1.58174	-0.52257	0.390786	0.424119	-0.90549	-0.31262	-1.75289			-0.4148	-0.179796	-0.0414469	0.206579	1.09688	2.99926	2.16455	1.40719	2.59316
	0.1464	-1.04689	-1.50853	-0.57041	0.445403	0.307624	-0.95324	-0.17288	-1.66192			-0.3904	-0.168912	0.0341028	0.215984	0.981161	3.05922	2.2079	1.38902	2.46398
	0.1708	-1.04295	-1.44715	-0.62198	0.498145	0.178083	-1.00978	-0.05022	-1.56063			-0.366	-0.142302	0.135464	0.249786	0.870698	3.1199	2.25377	1.35429	2.31399
	0.1952	-1.02886	-1.40576	-0.67632	0.534185	0.05757	-1.08551	0.056545	-1.45534			-0.3416	-0.100894	0.261097	0.305906	0.780036	3.19126	2.33542	1.30424	2.15148
	0.2196	-1.00763	-1.3839	-0.7332	0.553192	-0.03471	-1.17319	0.150825	-1.35327			-0.3172	-0.043504	0.406173	0.376656	0.737695	3.27821	2.46953	1.24471	1.98971
	0.244	-0.97587	-1.37712	-0.792	0.572508	-0.08863	-1.25297	0.235201	-1.26066			-0.2928	0.0327426	0.561834	0.448168	0.755922	3.37739	2.65703	1.18369	1.84364
	0.2684	-0.93107	-1.37779	-0.85107	0.616159	-0.10135	-1.30703	0.309794	-1.18086			-0.2684	0.127061	0.715942	0.504994	0.814579	3.481	2.88785	1.12885	1.72633
	0.2928	-0.87515	-1.3759	-0.90722	0.699525	-0.07418	-1.33309	0.37158	-1.11501			-0.244	0.233101	0.856911	0.536485	0.87039	3.58268	3.141	1.08644	1.6464
	0.3172	-0.81044	-1.36468	-0.95619	0.819329	-0.01322	-1.34354	0.416322	-1.06339			-0.2196	0.341103	0.97794	0.539961	0.881239	3.67906	3.38358	1.06216	1.60756
	0.3416	-0.73876	-1.34366	-0.99513	0.954172	0.070185	-1.35202	0.442042	-1.02573			-0.1952	0.441183	1.07537	0.520182	0.835824	3.76857	3.5795	1.06228	1.6107
	0.366	-0.66161	-1.31587	-1.02467	1.076	0.163595	-1.36513	0.450703	-1.00143			-0.1708	0.526607	1.14366	0.486867	0.759134	3.84999	3.7036	1.09158	1.65737
	0.3904	-0.57665	-1.28577	-1.04824	1.16057	0.25778	-1.38354	0.44829	-0.98974			-0.1464	0.594854	1.17604	0.451828	0.682084	3.9213	3.74785	1.14927	1.75082
	0.4148	-0.47734	-1.25892	-1.06918	1.19044	0.345687	-1.40777	0.442861	-0.98862			-0.122	0.646811	1.17036	0.426615	0.612916	3.98002	3.72315	1.22841	1.8925
	0.4392	-0.35722	-1.23727	-1.08831	1.16205	0.41895	-1.44207	0.438741	-0.99349			-0.0976	0.686714	1.1329	0.420055	0.542712	4.02655	3.65602	1.3195	2.0768
	0.4636	-0.21392	-1.2131	-1.10275	1.08956	0.467536	-1.49105	0.432156	-0.99773			-0.0732	0.721148	1.07737	0.436369	0.466841	4.06622	3.5767	1.4142	2.28916
	0.488	-0.05001	-1.17213	-1.1064	0.989947	0.483019	-1.55403	0.41501	-0.99597			-0.0488	0.756485	1.01948	0.47595	0.392453	4.10511	3.5136	1.50683	2.50858
	0.5124	0.128862	-1.10635	-1.09265	0.873367	0.461599	-1.61996	0.383142	-0.98723			-0.0244	0.798052	0.970513	0.536602	0.336731	4.14499	3.49474	1.59555	2.71274
	0.5368	0.314484	-1.02071	-1.05808	0.752708	0.40526	-1.66736	0.34035	-0.97437			0	0.850063	0.935196	0.612979	0.327498	4.18343	3.54621	1.68287	2.88418
	0.5612	0.495544	-0.92747	-1.00415	0.646367	0.322227	-1.67519	0.296334	-0.96126			0.0244	0.91255	0.915332	0.69802	0.391317	4.21495	3.68412	1.77322	3.01473
	0.5856	0.66132	-0.83934	-0.93657	0.567895	0.22384	-1.63282	0.262618	-0.95027			0.0488	0.978893	0.913273	0.787469	0.526423	4.23142	3.90336	1.86858	3.10539
	0.61	0.806494	-0.76668	-0.86376	0.517528	0.116618	-1.5431	0.24878	-0.9411			0.0732	1.03967	0.930222	0.882446	0.697523	4.22576	4.17762	1.96664	3.16224
	0.6344	0.929081	-0.71652	-0.79491	0.482712	-0.00178	-1.42441	0.259098	-0.93189			0.0976	1.0878	0.963157	0.987858	0.864484	4.19857	4.46892	2.06298	3.19183
	0.6588	1.02456	-0.69218	-0.73791	0.447868	-0.13606	-1.30738	0.291222	-0.92219			0.122	1.12002	1.00389	1.10858	1.00851	4.16073	4.73259	2.1535	3.19855
	0.6832	1.0876	-0.69035	-0.69735	0.409751	-0.28433	-1.22193	0.338398	-0.9145			0.1464	1.13772	1.03964	1.24486	1.13202	4.12829	4.92341	2.23548	3.18504
	0.7076	1.1176	-0.69875	-0.6733	0.383046	-0.43691	-1.18336	0.393557	-0.91266			0.1708	1.14559	1.0575	1.3891	1.24286	4.11367	5.00895	2.30856	3.15393
	0.732	1.11558	-0.70077	-0.66245	0.382633	-0.58176	-1.18826	0.452264	-0.91855			0.1952	1.14517	1.04962	1.52741	1.34446	4.1203	4.97923	2.37343	3.10816
	0.7564	1.08112	-0.68503	-0.66047	0.404407	-0.71001	-1.22158	0.512196	-0.93027			0.2196	1.13289	1.0133	1.64598	1.44078	4.14206	4.84582	2.42864	3.04952
	0.7808	1.01816	-0.65003	-0.66248	0.431584	-0.817	-1.26633	0.570035	-0.94328			0.244	1.10609	0.951026	1.73632	1.54145	4.16635	4.63687	2.47025	2.97738
	0.8052	0.935971	-0.60095	-0.66152	0.452869	-0.90044	-1.30951	0.620713	-0.95371			0.2684	1.06616	0.87175	1.79506	1.6481	4.18105	4.38754	2.49423	2.88889
	0.8296	0.842154	-0.54628	-0.6484	0.464935	-0.96043	-1.3456	0.661023	-0.9609			0.2928	1.01572	0.789024	1.82045	1.73974	4.17992	4.12806	2.4988	2.78185
	0.854	0.742693	-0.49586	-0.61416	0.465092	-0.99996	-1.37871	0.693405	-0.96673			0.3172	0.955881	0.716902	1.81026	1.78925	4.15969	3.88308	2.48605	2.65881
	0.8784	0.645686	-0.45606	-0.55415	0.456247	-1.02172	-1.41928	0.726016	-0.97258			0.3416	0.887317	0.666507	1.76331	1.79232	4.11658	3.67665	2.46346	2.52901
	0.9028	0.556662	-0.42624	-0.47145	0.450872	-1.02594	-1.4748	0.768403	-0.9766			0.366	0.813616	0.646871	1.68486	1.77078	4.05179	3.52876	2.44446	2.40764
	0.9272	0.474135	-0.40089	-0.37618	0.459685	-1.01358	-1.54029	0.82507	-0.97443			0.3904	0.740163	0.670762	1.59275	1.75777	3.97572	3.45292	2.44697	2.31312
	0.9516	0.394135	-0.37416	-0.27993	0.484906	-0.99032	-1.59816	0.891548	-0.96256			0.4148	0.671266	0.757864	1.51756	1.78878	3.90222	3.45976	2.49244	2.26346
	0.976	0.314193	-0.345	-0.18987	0.522005	-0.96507	-1.62866	0.955736	-0.94088			0.4392	0.610859	0.9326	1.49282	1.90043	3.84009	3.55768	2.60735	2.27429
	1.0004	0.231855	-0.31977	-0.1069	0.559851	-0.9437	-1.62114	1.00405	-0.9126			0.4636	0.563333	1.21978	1.54178	2.13191	3.79068	3.74918	2.82193	2.3588
	1.0248	0.145122	-0.30786	-0.02814	0.58687	-0.92498	-1.57506	1.02843	-0.88219			0.488	0.535668	1.6371	1.67237	2.51531	3.75546	4.02352	3.16035	2.52574
	1.0492	0.055538	-0.31543	0.050027	0.604612	-0.90269	-1.49238	1.02869	-0.85362			0.5124	0.541551	2.1858	1.88302	3.04664	3.74614	4.3497	3.62306	2.77412
	1.0736	-0.03088	-0.3441	0.131215	0.632324	-0.87117	-1.37761	1.01049	-0.82975			0.5368	0.600549	2.84645	2.16991	3.67017	3.78419	4.68513	4.17377	3.08603
	1.098	-0.10466	-0.39254	0.220538	0.687956	-0.82963	-1.24323	0.982141	-0.81251			0.5612	0.730232	3.58422	2.52863	4.30401	3.89145	5.00095	4.75009	3.42634
	1.1224	-0.1545	-0.45691	0.326422	0.762776	-0.78394	-1.10603	0.95146	-0.80344			0.5856	0.936024	4.35775	2.9523	4.88239	4.07971	5.29201	5.29722	3.76124
	1.1468	-0.17026	-0.53067	0.459634	0.820451	-0.74536	-0.98004	0.923553	-0.80425			0.61	1.20361	5.12239	3.429	5.38264	4.34222	5.56112	5.79318	4.07997
	1.1712	-0.14681	-0.60465	0.628154	0.81688	-0.72566	-0.87192	0.902845	-0.81686			0.6344	1.49923	5.83622	3.9374	5.82289	4.6526	5.8059	6.24208	4.39148
	1.1956	-0.08422	-0.66445	0.831558	0.726203	-0.73255	-0.77733	0.896689	-0.84297			0.6588	1.78088	6.47675	4.44135	6.23173	4.97252	6.01806	6.65208	4.70505
	1.22	0.015395	-0.69031	1.05889	0.561705	-0.76852	-0.6855	0.914821	-0.88321			0.6832	2.01324	7.05145	4.8917	6.61658	5.26469	6.18771	7.0245	5.02085
	1.2444	0.147065	-0.66524	1.29142	0.372795	-0.83039	-0.59188	0.96554	-0.93581			0.7076	2.17543	7.58824	5.24303	6.95784	5.50472	6.31026	7.35666	5.33478
	1.2688	0.297795	-0.58223	1.50921	0.220249	-0.90808	-0.50301	1.05228	-0.99604			0.732	2.25926	8.11446	5.47418	7.23163	5.68094	6.39215	7.64685	5.64423
	1.2932	0.447515	-0.44328	1.69807	0.148493	-0.98617	-0.42484	1.17008	-1.05741			0.7564	2.26428	8.64007	5.5946	7.43705	5.78447	6.44717	7.89481	5.94414
	1.3176	0.578801	-0.2572	1.85351	0.170979	-1.05074	-0.35097	1.30291	-1.11405			0.7808	2.19874	9.15652	5.63808	7.59815	5.80746	6.48672	8.09933	6.22075
	1.342	0.683734	-0.03976	1.97923	0.275553	-1.09689	-0.27132	1.42717	-1.16182			0.8052	2.08601	9.64881	5.65097	7.74826	5.74978	6.5203	8.25745	6.45401
	1.3664	0.761623	0.187534	2.08062	0.436408	-1.12992	-0.18581	1.52163	-1.19733			0.8296	1.96478	10.1053	5.67593	7.91794	5.62385	6.56195	8.36699	6.6268
	1.3908	0.815159	0.404108	2.15929	0.620635	-1.16006	-0.1011	1.57674	-1.2171			0.854	1.87681	10.5166	5.74224	8.12035	5.45605	6.62621	8.4298	6.73245
	1.4152	0.849038	0.59979	2.21347	0.795984	-1.19579	-0.0195	1.59758	-1.21873			0.8784	1.84947	10.8735	5.86825	8.34116	5.2788	6.71789	8.45218	6.77729
	1.4396	0.866942	0.778083	2.24365	0.940197	-1.24062	0.064158	1.60062	-1.20234			0.9028	1.88611	11.1714	6.06345	8.55242	5.1173	6.82704	8.44201	6.7789
	1.464	0.870298	0.9495	2.25758	1.04264	-1.29341	0.154642	1.60575	-1.16955			0.9272	1.97123	11.4159	6.32603	8.73363	4.98536	6.92802	8.40668	6.76035
	1.4884	0.86223	1.12329	2.26919	1.10164	-1.34877	0.246836	1.62786	-1.12061			0.9516	2.08553	11.6185	6.64461	8.87969	4.88853	6.98524	8.35371	6.74254
												0.976	2.21597	11.7879	7.00332	9.00087	4.82779	6.97127	8.29116	6.73984
												1.0004	2.35524	11.9246	7.38402	9.11594	4.80245	6.88362	8.22607	6.76098
												1.0248	2.49792	12.0241	7.76752	9.23579	4.80886	6.74251	8.16364	6.81294
												1.0492	2.63758	12.0843	8.13683	9.34924	4.83765	6.57408	8.10755	6.90409
												1.0736	2.76378	12.1089	8.48086	9.42928	4.87655	6.39557	8.05984	7.0437
												1.098	2.8632	12.1032	8.79465	9.45125	4.91763	6.21285	8.02117	7.23897
												1.1224	2.92739	12.0709	9.07707	9.39879	4.95989	6.03116	7.99248	7.4928
												1.1468	2.95887	12.0161	9.32965	9.26232	5.00261	5.86564	7.97579	7.80203
												1.1712	2.96954	11.9412	9.55723	9.04296	5.03981	5.73628	7.97258	8.15683
												1.1956	2.97491	11.8452	9.76868	8.75936	5.06534	5.65428	7.98263	8.54267
												1.22	2.98735	11.7251	9.97522	8.4466	5.07893	5.6182	8.00382	8.94329
												1.2444	3.01305	11.5808	10.1868	8.13966	5.08482	5.61783	8.03172	9.34223
												1.2688	3.0554	11.4192	10.4093	7.85451	5.08824	5.63727	8.05927	9.72257
												1.2932	3.11745	11.251	10.6446	7.58266	5.09453	5.65633	8.07838	10.0666
												1.3176	3.20002	11.0841	10.8919	7.30287	5.10965	5.64818	8.08215	10.3579
												1.342	3.30059	10.9219	11.148	7.00169	5.13887	5.58411	8.06604	10.584
												1.3664	3.41658	10.7651	11.4046	6.68291	5.1846	5.45164	8.02768	10.7389
												1.3908	3.54911	10.6143	11.647	6.36059	5.24541	5.26341	7.9657	10.8216
												1.4152	3.69955	10.4741	11.8583	6.04861	5.31753	5.05035	7.87874	10.8351
												1.4396	3.8599	10.3566	12.0233	5.75161	5.397	4.85194	7.76607	10.7849
												1.464	4.01161	10.2762	12.1309	5.46531	5.47953	4.69741	7.6292	10.6787
												1.4884	4.13722	10.2424	12.1769	5.1889	5.55824	4.58578	7.47314	10.5278
												1.5128	4.22883	10.2553	12.1668	4.92616	5.6232	4.49391	7.30621	10.3479
												1.5372	4.28651	10.304	12.1172	4.66957	5.66398	4.40143	7.13664	10.1571
												1.5616	4.31594	10.3687	12.0515	4.40074	5.67229	4.2999	6.9687	9.97189
												1.586	4.32776	10.4286	11.9914	4.11385	5.64356	4.18995	6.80301	9.80313
												1.6104	4.33369	10.4694	11.9505	3.822	5.58003	4.07694	6.64061	9.65417
												1.6348	4.34096	10.4844	11.9325	3.53953	5.49317	3.95978	6.48621	9.5232
												1.6592	4.35226	10.472	11.935	3.27662	5.40081	3.82553	6.34728	9.40754
												1.6836	4.37011	10.4339	11.9531	3.04825	5.32221	3.66181	6.23019	9.3054
												1.708	4.39562	10.3725	11.9787	2.87383	5.27375	3.46927	6.13691	9.21519
												1.7324	4.42427	10.2918	11.9963	2.76881	5.26171	3.25851	6.06502	9.13618
												1.7568	4.44907	10.1983	11.9851	2.73835	5.27684	3.04434	6.01059	9.07038
												1.7812	4.46629	10.1016	11.9273	2.77275	5.29809	2.85174	5.97044	9.02178
												1.8056	4.47543	10.0141	11.8156	2.8473	5.30248	2.71781	5.94308	8.99361
												1.83	4.47673	9.9505	11.6558	2.93547	5.27346	2.67925	5.93001	8.98813
												1.8544	4.47037	9.92371	11.4664	3.02636	5.20634	2.76431	5.93662	9.00849
												1.8788	4.45738	9.9419	11.2752	3.12516	5.11261	2.98939	5.97078	9.05887
												1.9032	4.44114	10.008	11.1153	3.24277	5.02042	3.34967	6.03955	9.14176
												1.9276	4.42666	10.1177	11.0214	3.39169	4.96662	3.82099	6.14562	9.25566
												1.952	4.4186	10.2589	11.0282	3.58053	4.98397	4.37398	6.28588	9.39721
												1.9764	4.42028	10.4148	11.1627	3.8058	5.0907	4.97754	6.45386	9.56494
												2.0008	4.43384	10.5693	11.4339	4.05982	5.28374	5.59494	6.64408	9.76021
												2.0252	4.46148	10.7098	11.8285	4.34752	5.54138	6.1854	6.85451	9.98494
												2.0496	4.50585	10.829	12.3168	4.68366	5.83744	6.71016	7.08511	10.2391
												2.074	4.56776	10.9256	12.8617	5.07396	6.1527	7.1389	7.33439	10.5192
												2.0984	4.64203	11.0061	13.4251	5.50208	6.47237	7.45333	7.59797	10.818
												2.1228	4.71638	11.0831	13.9738	5.92988	6.77835	7.64943	7.86909	11.1226
												2.1472	4.77623	11.1697	14.4817	6.3145	7.05111	7.73982	8.13982	11.4129
												2.1716	4.81148	11.2747	14.9266	6.6315	7.28112	7.75372	8.40368	11.6643
												2.196	4.8218	11.4021	15.2883	6.87926	7.47515	7.7345	8.6581	11.8544
												2.2204	4.81828	11.5553	15.5554	7.0645	7.65255	7.73038	8.90399	11.9699
												2.2448	4.81881	11.7395	15.7308	7.18943	7.83653	7.77702	9.14134	12.0086
												2.2692	4.84005	11.9575	15.8278	7.25162	8.04439	7.88272	9.36407	11.9821
												2.2936	4.88942	12.2059	15.8616	7.2519	8.28086	8.02739	9.56036	11.9149
												2.318	4.96143	12.476	15.8495	7.19856	8.53776	8.17751	9.71916	11.8361
												2.3424	5.04271	12.7555	15.8117	7.10542	8.79639	8.30501	9.83538	11.7712
												2.3668	5.11969	13.0276	15.7667	6.99198	9.03242	8.39609	9.90911	11.7405
												2.3912	5.18236	13.2764	15.7245	6.88228	9.2245	8.45781	9.94268	11.7597
												2.4156	5.22505	13.4942	15.6869	6.79422	9.35918	8.52186	9.93853	11.838
												2.44	5.24368	13.6837	15.6524	6.72851	9.43008	8.62618	9.89557	11.9777
												2.4644	5.23245	13.8523	15.6188	6.66754	9.43895	8.78807	9.80753	12.1739
												2.4888	5.18558	14.0061	15.585	6.58766	9.39569	8.99876	9.66948	12.4132
												2.5132	5.10118	14.1492	15.5521	6.48042	9.31307	9.23553	9.48776	12.6759
												2.5376	4.9827	14.2868	15.5219	6.36123	9.20304	9.47046	9.28397	12.9416
												2.562	4.83851	14.4272	15.493	6.25343	9.07776	9.66964	9.08989	13.1935
												2.5864	4.68016	14.577	15.462	6.16775	8.94863	9.79626	8.93731	13.4159
												2.6108	4.52107	14.7355	15.4305	6.10081	8.82348	9.82874	8.8484	13.5902
												2.6352	4.37587	14.8912	15.4076	6.04341	8.70706	9.77452	8.82996	13.6971
												2.6596	4.2556	15.0275	15.4056	5.98259	8.60471	9.65881	8.87318	13.7282
												2.684	4.1611	15.1304	15.4331	5.90895	8.52538	9.50792	8.95906	13.695
												2.7084	4.08642	15.1906	15.4884	5.82619	8.47963	9.34764	9.0663	13.6265
												2.7328	4.02784	15.2005	15.5604	5.74492	8.47288	9.20045	9.17709	13.5583
												2.7572	3.98365	15.1549	15.6373	5.67203	8.50025	9.07468	9.27974	13.5179
												2.7816	3.94976	15.053	15.7127	5.60745	8.55017	8.96308	9.36996	13.5136
												2.806	3.92366	14.8994	15.7843	5.54796	8.61317	8.85361	9.45059	13.5363
												2.8304	3.90881	14.703	15.8506	5.49831	8.68304	8.73977	9.52829	13.5705
												2.8548	3.91222	14.4764	15.9096	5.47345	8.74994	8.62324	9.60799	13.6049
												2.8792	3.94226	14.2333	15.9588	5.48205	8.80103	8.50922	9.69004	13.6341
												2.9036	4.00606	13.9871	15.9966	5.51415	8.82972	8.39921	9.77209	13.6551
												2.928	4.10152	13.7527	16.0259	5.54812	8.8387	8.28949	9.85094	13.6643
												2.9524	4.21319	13.5447	16.056	5.56245	8.83344	8.17937	9.92068	13.6581
												2.9768	4.3168	13.371	16.1003	5.54454	8.8157	8.0822	9.9704	13.6345
												3.0012	4.38637	13.231	16.1709	5.4941	8.78249	8.02479	9.98593	13.5937
												3.0256	4.40203	13.1203	16.2729	5.41789	8.72856	8.032	9.95573	13.5355
												3.05	4.35642	13.0345	16.4045	5.32825	8.6485	8.10803	9.8764	13.4588
												3.0744	4.25417	12.969	16.5592	5.24418	8.53689	8.23177	9.75454	13.364
												3.0988	4.10782	12.9171	16.7269	5.1819	8.39047	8.37504	9.60568	13.2548
												3.1232	3.93479	12.8712	16.8935	5.1392	8.21518	8.51833	9.44975	13.136
												3.1476	3.75239	12.8256	17.0414	5.08898	8.02956	8.63956	9.30318	13.0122
												3.172	3.57076	12.7752	17.1525	4.99754	7.8568	8.70612	9.17247	12.8878
												3.1964	3.3914	12.7139	17.2123	4.85092	7.71292	8.69828	9.0537	12.7687
												3.2208	3.21551	12.6377	17.2139	4.65838	7.60087	8.6273	8.93714	12.6616
												3.2452	3.05109	12.5456	17.1604	4.43657	7.51228	8.51648	8.81368	12.5716
												3.2696	2.90987	12.4394	17.0625	4.19465	7.43286	8.38095	8.68004	12.5012
												3.294	2.80372	12.3235	16.9327	3.93528	7.3468	8.23644	8.53951	12.4513
												3.3184	2.7463	12.2046	16.7821	3.66617	7.24018	8.11111	8.39792	12.421
												3.3428	2.74892	12.0919	16.621	3.40455	7.10692	8.03484	8.25826	12.4043
												3.3672	2.81196	11.9961	16.4588	3.17971	6.95342	8.02078	8.11789	12.3907
												3.3916	2.92188	11.9258	16.3013	3.03178	6.79489	8.06869	7.96964	12.3689
												3.416	3.05307	11.8823	16.1469	2.98989	6.64457	8.17955	7.80714	12.3318
												3.4404	3.17544	11.8573	15.9861	3.04541	6.50599	8.34922	7.63134	12.2774
												3.4648	3.26471	11.8343	15.8056	3.15404	6.3744	8.55207	7.45219	12.2062
												3.4892	3.30623	11.7957	15.5961	3.26341	6.24458	8.74274	7.28315	12.1195
												3.5136	3.29551	11.7293	15.3596	3.33382	6.11715	8.87817	7.13489	12.0195
												3.538	3.2399	11.6307	15.1064	3.34357	5.99644	8.9444	7.01326	11.909
												3.5624	3.15698	11.4985	14.8466	3.29549	5.88471	8.96104	6.9186	11.7889
												3.5868	3.06576	11.3308	14.5851	3.2185	5.78177	8.9563	6.84528	11.656
												3.6112	2.97619	11.1278	14.3253	3.14583	5.68648	8.94307	6.78486	11.5057
												3.6356	2.88854	10.893	14.0721	3.089	5.59474	8.9169	6.72987	11.3372
												3.66	2.79955	10.6318	13.8309	3.0368	5.50044	8.86471	6.67402	11.1583
												3.6844	2.70466	10.3534	13.6044	2.9709	5.4009	8.77302	6.61163	10.9844
												3.7088	2.59937	10.0721	13.3911	2.87922	5.29758	8.63655	6.53784	10.8315
												3.7332	2.48402	9.8007	13.1865	2.76527	5.19342	8.46422	6.44833	10.7083
												3.7576	2.36694	9.54583	12.9857	2.64285	5.09197	8.27692	6.33948	10.6142
												3.782	2.2605	9.31161	12.7847	2.51743	4.99436	8.09804	6.2106	10.5419
												3.8064	2.17406	9.1029	12.5798	2.38575	4.89716	7.94137	6.06636	10.4834
												3.8308	2.11036	8.92619	12.3685	2.25346	4.79737	7.80488	5.91657	10.4331
												3.8552	2.06724	8.79003	12.1514	2.13906	4.69762	7.67332	5.77194	10.3894
												3.8796	2.0413	8.70334	11.9336	2.05922	4.60513	7.52761	5.63906	10.3514
												3.904	2.02761	8.67128	11.7243	2.00972	4.52752	7.35617	5.51833	10.3154
												3.9284	2.01596	8.68995	11.5346	1.96149	4.46829	7.1613	5.40479	10.2736
												3.9528	1.99351	8.74296	11.3723	1.88333	4.42328	6.95967	5.29034	10.2172
												3.9772	1.95298	8.80471	11.2362	1.76743	4.38136	6.77352	5.16798	10.1411
												4.0016	1.89488	8.85068	11.1183	1.63263	4.32915	6.61211	5.0365	10.0473
												4.026	1.82373	8.86592	11.0075	1.51191	4.25678	6.46323	4.90127	9.94433
												4.0504	1.74588	8.84439	10.8911	1.43645	4.16034	6.30793	4.76945	9.84241
												4.0748	1.66922	8.78326	10.7573	1.42643	4.04169	6.14325	4.64441	9.74807
												4.0992	1.60151	8.6805	10.6003	1.49099	3.90903	5.98666	4.5245	9.66105
												4.1236	1.54845	8.53608	10.4232	1.62329	3.77577	5.85447	4.4057	9.57782
												4.148	1.51313	8.35318	10.234	1.79944	3.65471	5.74336	4.28447	9.49569
												4.1724	1.49705	8.13802	10.0418	1.99632	3.55055	5.63923	4.15885	9.41285
												4.1968	1.50159	7.89728	9.85497	2.20127	3.45958	5.53121	4.0289	9.32663
												4.2212	1.52479	7.6365	9.68041	2.39615	3.37862	5.41456	3.89764	9.23256
												4.2456	1.55549	7.3615	9.52399	2.54634	3.31112	5.29216	3.77163	9.12452
												4.27	1.57548	7.07946	9.39048	2.61814	3.26259	5.16965	3.66006	8.99734
												4.2944	1.56856	6.79835	9.28241	2.60259	3.23421	5.04281	3.57158	8.85071
												4.3188	1.52526	6.52663	9.19671	2.52089	3.22351	4.89975	3.50882	8.69032
												4.3432	1.44311	6.27248	9.12217	2.41538	3.22868	4.73799	3.46681	8.52566
												4.3676	1.32629	6.04126	9.04291	2.32538	3.24822	4.56914	3.43824	8.36715
												4.392	1.18446	5.83307	8.94675	2.25706	3.27792	4.41264	3.4175	8.22265
												4.4164	1.03277	5.64224	8.83021	2.18283	3.31101	4.29277	3.39962	8.09448
												4.4408	0.890116	5.4604	8.69561	2.07714	3.33998	4.22978	3.37956	7.98006
												4.4652	0.771678	5.28261	8.5457	1.94244	3.35733	4.2248	3.35348	7.87529
												4.4896	0.683845	5.11226	8.38399	1.79625	3.35587	4.25856	3.31873	7.77657
												4.514	0.625439	4.9594	8.21907	1.65155	3.33056	4.30923	3.27307	7.68071
												4.5384	0.589682	4.83214	8.0624	1.51719	3.28145	4.36835	3.21544	7.58509
												4.5628	0.566391	4.72987	7.91866	1.39989	3.21574	4.4374	3.14762	7.4885
												4.5872	0.545093	4.64589	7.78082	1.29872	3.14777	4.51412	3.07377	7.38956
												4.6116	0.518511	4.57441	7.63595	1.20436	3.09275	4.58678	2.99735	7.28376
												4.636	0.483896	4.51425	7.47458	1.1029	3.05752	4.63838	2.91882	7.1642
												4.6604	0.438204	4.46817	7.29509	0.984279	3.03844	4.64971	2.83599	7.02707
												4.6848	0.375147	4.43922	7.10138	0.854878	3.0252	4.60321	2.746	6.87582
												4.7092	0.29101	4.42651	6.89952	0.737595	3.00454	4.49496	2.64856	6.72017
												4.7336	0.190753	4.42325	6.69796	0.655163	2.9643	4.34087	2.54755	6.57273
												4.758	0.0872474	4.4191	6.50702	0.614865	2.89733	4.1668	2.44951	6.44622
												4.7824	-0.00489884	4.40487	6.33528	0.610392	2.80317	3.99751	2.36065	6.35104
												4.8068	-0.0756112	4.37788	6.18852	0.63528	2.68649	3.85072	2.28336	6.2926
												4.8312	-0.121455	4.34439	6.07358	0.686287	2.55562	3.73126	2.21402	6.26997
												4.8556	-0.144395	4.31489	5.99935	0.757131	2.42323	3.6342	2.14527	6.27662
												4.88	-0.149003	4.29679	5.96873	0.840234	2.30468	3.55762	2.07144	6.30245
												4.9044	-0.140572	4.2927	5.97045	0.927021	2.21003	3.50697	1.99223	6.33704
												4.9288	-0.125369	4.30038	5.98126	1.00007	2.13697	3.48576	1.91192	6.37215
												4.9532	-0.109643	4.31251	5.97546	1.03578	2.07468	3.48784	1.83638	6.40077
												4.9776	-0.0960416	4.32128	5.93312	1.01833	2.014	3.50244	1.76991	6.41537
												5.002	-0.0809881	4.32236	5.84351	0.949471	1.95207	3.52235	1.71286	6.40978

## Sheet: Figure 7 - supplement 2 
Panel A- dmPFC Cue AUC change scores												Panel B- dmPFC Action AUC change scores											Panel C- dmPFC Food AUC change scores											Panel D- dmPFC Footshock AUC change scores
					0% risk											0% risk											0% risk											No shock
		S264	S251	S252	S256	S257	S283	S318	S320	S321			S264	S251	S252	S256	S257	S283	S318	S320	S321			S264	S251	S252	S256	S257	S283	S318	S320	S321			S264	S251	S252	S256	S257	S283	S318	S320	S321
	Session 1		6.01527		25.4302	1.48006	-29.6854	-11.2023	29.33	4.2028		Session 1		-52.2475		-39.2825	-7.56251	-39.2212	-16.1124	-39.4572	-31.7827		Session 1		-0.17859		40.3043	101.218	-1.5191	-54.0036	77.3987	-83.4911		Session 1		-28.6734	-6.97453	-11.318	2.81304	11.6351	32.2262	15.7473	-36.3941
	Session 2	6.93791	-6.83105	-14.2168	0.099695	14.1381	-6.29325	-7.46279	21.9626	1.06411		Session 2	-42.741	0.684771	-17.832	8.8885	-20.747	-29.3846	-22.6452	-23.8166	-26.2822		Session 2	100.569	122.251	37.7557	34.8302	61.338	-47.302	-28.5726	-9.57338	-54.7085		Session 2	-8.75037	-3.19747	-19.4157	20.2277	-9.25888	13.8327	-3.36041	10.0026	-25.5381
	Session 3	-5.06915	-42.8533	7.1015	1.9715	-13.3849		-13.6482	-6.87291	22.7334		Session 3	-80.7651	-19.8868	-19.1653	18.7808	-18.8453		-53.4052	-78.886	-25.4223		Session 3	-20.565	47.7156	99.1631	152.974	58.2581		-96.0846	27.0926	-11.3416		Session 3	-21.7692	3.74825	33.6538	9.90074	-16.6603		-15.5104	14.2155	-9.22502
					6% Risk											6% Risk											6% Risk											Footshock
		S264	S251	S252	S256	S257	S283	S318	S320	S321			S264	S251	S252	S256	S257	S283	S318	S320	S321			S264	S251	S252	S256	S257	S283	S318	S320	S321			S264	S251	S252	S256	S257	S283	S318	S320	S321
	Session 1		-21.7124	27.283	10.5092	-33.4073	-5.45264	-0.63879	-0.84197	-15.145		Session 1		-18.3227	-17.9947	-30.9103	-4.50459	-32.976	-15.309	-52.716	-17.6812		Session 1		14.1266	98.8171	26.119	53.3589	-45.7343	2.19594	47.285	-83.7769		Session 1		58.3477	109.677	134.609	56.7702	321.067	113.877	148.218	305.707
	Session 2	-11.3389	18.0682	30.3954	6.37969	11.4159	-19.5333	-3.26227	33.157	3.22827		Session 2	-8.5064	-71.2608	-23.9989	-17.5551	-5.78878	-1.36498	-12.6944	-12.0515	-3.54115		Session 2	3.69306	-12.6936	26.3014	15.2327	98.2271	-29.035	-52.4739	120.979	27.2111		Session 2	307.707	2.66979	252.895	87.2525	-13.9115	515.338	193.493	126.695	257.071
	Session 3	22.7517	38.8374	-1.98891	-4.71575	9.16201		49.4313	6.09475	1.34699		Session 3	-21.5261	15.3222	-31.4407	2.03721	1.78533		-18.4692	-17.7213	0.708057		Session 3	49.92	74.8454	49.9544	60.2309	186.1		-53.6387	93.4583	54.929		Session 3	417.484	30.4061	160.82	344.788	153.828		97.0612	205.849	352.249
					10% Risk											10% Risk											10% Risk
		S264	S251	S252	S256	S257	S283	S318	S320	S321			S264	S251	S252	S256	S257	S283	S318	S320	S321			S264	S251	S252	S256	S257	S283	S318	S320	S321
	Session 1		2.47472	47.5779	-18.2661	-18.163	49.6206	20.8118	23.7686	-7.6372		Session 1		-28.5433	-9.15054	14.7149	-11.2603	8.29495	3.82345	-24.3908	-17.0174		Session 1		89.1793	75.6399	26.4641	67.0031	-7.38276	-29.2119	57.6099	102.302
	Session 2	7.99202		52.8177				-18.6542	59.8663	-0.99871		Session 2	-44.4011		61.2131				-26.5916	-41.0274	1.78795		Session 2	170.627		280.687				-24.2478	551.8*	107.819
	Session 3	36.3504	69.9633	13.0527				-24.6658		1.60224		Session 3	20.34	-40.8187	48.6251				-23.6112		-26.8376		Session 3	179.611	82.1094	292.762				-43.6113		120.182
																							*=excluded as outlier
Panel E- VTA Cue AUC change scores								Panel F- VTA Action AUC change scores								Panel G- VTA Food AUC change scores								Panel H- VTA Footshock AUC change scores
			0% Risk								0% Risk								0% Risk								No shock
		S251	S252	S256	S320					S251	S252	S256	S320					S251	S252	S256	S320					S251	S252	S256	S320
	Session 1	4.38289	-19.6788	7.81598	20.3591				Session 1	-25.9469	-14.7671	-28.7641	-20.2193				Session 1	552.417	534.226	272.348	177.786				Session 1	84.8097	12.0041	11.6966	5.16024
	Session 2	7.26493	-23.6444	16.7424	7.3051				Session 2	7.33503	8.7106	16.5031	-9.65204				Session 2	331.264	627.864	386.862	196.885				Session 2	52.4593	57.8693	58.4088	33.7933
	Session 3	0.300342	-34.1374	-17.5607	-17.2273				Session 3	0.636808	-25.0017	8.359	27.6274				Session 3	462.474	669.496	240.907	254.373				Session 3	80.8918	124.067	70.6571	60.5407
			6% Risk								6% Risk								6% Risk								Footshock
		S251	S252	S256	S320					S251	S252	S256	S320					S251	S252	S256	S320					S251	S252	S256	S320
	Session 1	4.80524	6.1923	17.9164	2.44818				Session 1	-9.78053	-11.9076	-18.0212	-8.23868				Session 1	718.595	498.851	274.226	178.27				Session 1	519.592	197.9	149.824	101.202
	Session 2	-1.51104	-25.3471	-40.1915	21.8808				Session 2	25.5834	7.0714	3.79919	22.9354				Session 2	564.047	772.141	275.26	402.055				Session 2	460.205	393.224	159.902	180.32
	Session 3	-25.4485	-13.4479	-19.9047	-13.1302				Session 3	30.2451	24.2706	-53.6828	20.1903				Session 3	617.708	996.183	504.87	297.738				Session 3	442.317	319.485	203.43	122.323
			10% Risk								10% Risk								10% Risk
		S251	S252	S256	S320					S251	S252	S256	S320					S251	S252	S256	S320
	Session 1	-1.92492	29.4223	-15.8497	10.2766				Session 1	15.6967	-17.9953	-13.7362	-32.1146				Session 1	847.77	42.5484	400.6	171.143
	Session 2		106.523		198.22				Session 2		122.27		17.3322				Session 2		1046.47		317.326
	Session 3	181.457	-26.3778		167.785				Session 3	149.405	147.478		19.42				Session 3	891.976	1068.62		665.905

## Sheet: Figure 7 - supplement 3
Panel A- dmPFC Cue AUC change scores												Panel B- dmPFC Action AUC change scores											Panel C- dmPFC Food AUC change scores											Panel D- dmPFC Footshock AUC change scores
					0% risk											0% risk											0% risk											No shock
			S251	S252	S256	S257	S283	S318	S320	S321				S251	S252	S256	S257	S283	S318	S320	S321				S251	S252	S256	S257	S283	S318	S320	S321				S251	S252	S256	S257	S283	S318	S320	S321
	Session 1		6.01527		25.4302	1.48006	-29.6854	-11.2023	29.33	4.2028		Session 1		-52.2475		-39.2825	-7.56251	-39.2212	-16.1124	-39.4572	-31.7827		Session 1		-0.17859		40.3043	101.218	-1.5191	-54.0036	77.3987	-83.4911		Session 1		-28.6734	-6.97453	-11.318	2.81304	11.6351	32.2262	15.7473	-36.3941
	Saline		16.14	-0.02184	17.9178		6.58379	21.5174	9.61928	-19.293		Saline		-28.3399	-10.8684	-29.5762		-35.3676	-31.5475	-41.3789	-25.9362		Saline		33.929	126.276	93.841		-34.5023	-35.2357	-16.36	47.317		Saline		-6.2397	0.753092	2.31049		-4.27648	-16.8885	-27.7164	-5.85049
	Diazepam		-8.02457	-18.1864	39.6417		-6.66525	16.3198	46.9123	2.14507		Diazepam		-1.47919	-44.4162	-21.8221		-41.0489	-69.54	-55.2489	-19.6305		Diazepam		77.6182	-30.0555	-39.2525		-1.61488	20.2346	-5.80003	42.9482		Diazepam		-37.5491	-27.0454	-47.0944		0.966972	-49.5848	-44.6116	-1.94341
					6% Risk											6% Risk											6% Risk											Footshock
			S251	S252	S256	S257	S283	S318	S320	S321				S251	S252	S256	S257	S283	S318	S320	S321				S251	S252	S256	S257	S283	S318	S320	S321				S251	S252	S256	S257	S283	S318	S320	S321
	Session 1		-21.7124	27.283	10.5092	-33.4073	-5.45264	-0.63879	-0.84197	-15.145		Session 1		-18.3227	-17.9947	-30.9103	-4.50459	-32.976	-15.309	-52.716	-17.6812		Session 1		14.1266	98.8171	26.119	53.3589	-45.7343	2.19594	47.285	-83.7769		Session 1		58.3477	109.677	134.609	56.7702	321.067	113.877	148.218	305.707
	Saline		12.2473	1.59501	18.6114		-11.4929	-19.86	-18.3397	-5.76029		Saline		21.2549	-25.8576	-24.5671		-3.05548	-8.14787	-34.7091	-4.91999		Saline		56.7116	-19.8555	71.3825		22.6107	-57.9057	-41.3653	47.8272		Saline		48.1809	-1.49786	180.89		193.974	91.6668	82.6466	170.97
	Diazepam		-1.34999	29.9517	-8.09703		-11.6881	40.5647	14.0197	-6.99462		Diazepam		-13.2298	-76.2319	-0.15715		-8.92007	-43.2535	-50.3814	-29.6369		Diazepam		73.4655	-143.599	-19.3305		17.36	14.4993	139.969	77.5186		Diazepam		111.758	56.3689	193.085		187.222	74.3377	178.017	127.45
					10% Risk											10% Risk											10% Risk
			S251	S252	S256	S257	S283	S318	S320	S321				S251	S252	S256	S257	S283	S318	S320	S321				S251	S252	S256	S257	S283	S318	S320	S321
	Session 1		2.47472	47.5779	-18.2661	-18.163	49.6206	20.8118	23.7686	-7.6372		Session 1		-28.5433	-9.15054	14.7149	-11.2603	8.29495	3.82345	-24.3908	-17.0174		Session 1		89.1793	75.6399	26.4641	67.0031	-7.38276	-29.2119	57.6099	102.302
	Saline		-30.5032	-3.90572	14.7653		23.2523	11.0807	19.2287	-10.0081		Saline		-16.4091	5.22246	28.7253		-4.50511	-40.2183	-49.6689	13.1239		Saline		133.276	197.666	78.5587		-31.5148	35.0833	141.108	152.136
	Diazepam		48.2164	23.1055	6.3733		-1.47096	12.5411	3.89226	-4.02494		Diazepam		-14.2882	-22.0695	-28.3027		6.86825	-16.9645	-29.9899	17.7264		Diazepam		87.6191	-34.6991	-48.3654		210.11	-14.6528	108.429	52.6843
																							*=excluded as outlier
Panel E- VTA Cue AUC change scores								Panel F- VTA Action AUC summation scores								Panel G- VTA Food AUC change scores								Panel H- VTA Footshock AUC change scores
			0% Risk								0% Risk								0% Risk								No shock
		S251	S252	S256	S320					S251	S252	S256	S320					S251	S252	S256	S320					S251	S252	S256	S320
	Session 1	4.38289	-19.6788	7.81598	20.3591				Session 1	9.0972	-36.5547	47.8094	11.7051				Session 1	552.417	534.226	272.348	177.786				Session 1	84.8097	12.0041	11.6966	5.16024
	Saline	28.5888	-11.4441	-29.3165	-0.45679				Saline	67.6587	85.8918	-6.78661	71.2346				Saline	503.055	584.03	337.691	281.617				Saline	48.4749	73.5003	44.4471	59.6343
	Diazepam	30.0336	16.247	4.67393	8.28746				Diazepam	168.282	292.469	137.67	119.237				Diazepam	545.157	264.922	138.169	129.209				Diazepam	20.5322	-46.0611	-26.2482	30.1261
			6% Risk								6% Risk								6% Risk								Footshock
		S251	S252	S256	S320					S251	S252	S256	S320					S251	S252	S256	S320					S251	S252	S256	S320
	Session 1	4.80524	6.1923	17.9164	2.44818				Session 1	-24.7161	30.802	5.61799	-47.3056				Session 1	718.595	498.851	274.226	178.27				Session 1	519.592	197.9	149.824	101.202
	Saline	-13.3987	3.02346	20.5669	27.1548				Saline	-8.38837	-13.7674	18.7164	132.222				Saline	516.097	605.693	384.301	402.535				Saline	359.625	266.335	74.1273	251.819
	Diazepam	94.3286	31.8715	2.54047	15.0053				Diazepam	164.601	287.351	103.327	153.365				Diazepam	422.749	369.595	298.494	321.924				Diazepam	229.435	189.101	46.3895	94.1785
			10% Risk								10% Risk								10% Risk
		S251	S252	S256	S320					S251	S252	S256	S320					S251	S252	S256	S320
	Session 1	-1.92492	29.4223	-15.8497	10.2766				Session 1	-7.69632	-504.484*	89.5911	103.327				Session 1	847.77	42.5484	400.6	171.143
	Saline	-7.45015	20.1968	175.336	-1.94991				Saline	-14.1847	-18.8794	18.2768	172.061				Saline	645.729	753.293	475.903	265.17
	Diazepam	83.1981	17.2563	197.342	3.95022				Diazepam	31.8962	82.7212	27.9957	162.703				Diazepam	514.327	382.625	240.823	387.571
									*=excluded as outlier

## Sheet: Figure 7 - S2-3 AdditionalData 
			Data not plotted but used in main ANOVA - VTA Action AUC change scores (relevant to Figure 7 - supplement 2F)													Data not plotted but used in main ANOVA - VTA Action AUC summation scores (relevant to Figure 7 - supplement 3F)
						0% Risk													0% Risk
					S251	S252	S256	S320										S251	S252	S256	S320
				Saline	30.2914	47.3139	-4.23969	23.024									Session 2	-0.65068	27.7776	11.8472	12.7767
				Diazepam	31.5988	0.268143	0.612852	-19.1654									Session 3	2.89835	-31.2219	6.39612	126.979
						6% Risk													6% Risk
					S251	S252	S256	S320										S251	S252	S256	S320
				Saline	12.6231	-8.90465	16.724	38.4032									Session 2	-16.1871	131.56	61.4763	165.738
				Diazepam	-3.02561	-2.23997	14.1661	29.6392									Session 3	-20.8047	34.7858	43.9953	179.729
						10% Risk													10% Risk
					S251	S252	S256	S320										S251	S252	S256	S320
				Saline	41.8259	18.0167	11.3555	59.3444									Session 2		142.866		234.981
				Diazepam	13.3055	-14.6618	17.8231	68.0714									Session 3	218.401	39.8722		496.2508*
																	*=excluded as outlier
