# Supplementary material for: Learning of probabilistic punishment as a model of anxiety produces changes in action but not punisher encoding in the dmPFC and VTA
Source: eLife. 2022 Sep 14;11:e78912. doi: 10.7554/eLife.78912 (PMC9525102; doi:10.7554/eLife.78912)
Supplement: Figure 8—source data 1. [file elife-78912-fig8-data1.xlsx]

## Sheet: Figure 8A-C
					SALINE									DIAZEPAM
				Peri-action cross correlation									Peri-action cross correlation
	0			6			10				0			6			10
Lag (1 unit = .0244 sec)	Mean	SD	N	Mean	SD	N	Mean	SD	N		Mean	SD	N	Mean	SD	N	Mean	SD	N
-83	-0.00403	0.017364	120	0.00262	0.024297	107	0.000514	0.020671	77		-0.0035	0.024051	115	-0.00025	0.023155	105	0.001105	0.022457	78
-82	-0.00761	0.033666	120	0.004989	0.046084	107	-1.96e-06	0.038547	77		-0.00726	0.046759	115	-0.00072	0.044843	105	0.001791	0.043675	78
-81	-0.01072	0.048989	120	0.007075	0.06519	107	-0.00109	0.054888	77		-0.01107	0.068063	115	-0.00137	0.064967	105	0.002273	0.063598	78
-80	-0.01338	0.063435	120	0.008847	0.081694	107	-0.00226	0.070464	77		-0.0148	0.087905	115	-0.00215	0.083524	105	0.002632	0.08213	78
-79	-0.01564	0.07708	120	0.01029	0.095917	107	-0.00305	0.085456	77		-0.0184	0.106214	115	-0.00299	0.100566	105	0.002878	0.099166	78
-78	-0.01756	0.089959	120	0.011428	0.108339	107	-0.00311	0.099637	77		-0.02191	0.122906	115	-0.00379	0.116175	105	0.003025	0.114596	78
-77	-0.0192	0.102063	120	0.012331	0.119468	107	-0.0023	0.112665	77		-0.02535	0.137915	115	-0.00452	0.130449	105	0.003128	0.128322	78
-76	-0.02063	0.11331	120	0.013074	0.129717	107	-0.00073	0.124258	77		-0.02876	0.151248	115	-0.00519	0.143482	105	0.003273	0.140276	78
-75	-0.0219	0.123571	120	0.013693	0.139319	107	0.001352	0.134252	77		-0.03213	0.163007	115	-0.00585	0.155332	105	0.00355	0.150426	78
-74	-0.02298	0.132721	120	0.014175	0.148309	107	0.003604	0.142617	77		-0.0354	0.173362	115	-0.00658	0.165998	105	0.004032	0.158755	78
-73	-0.02383	0.140697	120	0.014477	0.156561	107	0.005718	0.149501	77		-0.03845	0.18248	115	-0.00747	0.175454	105	0.004752	0.165288	78
-72	-0.02438	0.147509	120	0.014573	0.1639	107	0.007498	0.15524	77		-0.04118	0.190493	115	-0.00854	0.183703	105	0.005719	0.170127	78
-71	-0.02459	0.153239	120	0.014477	0.170214	107	0.008869	0.160293	77		-0.0435	0.197518	115	-0.00977	0.190826	105	0.006922	0.173468	78
-70	-0.02443	0.158045	120	0.01425	0.175523	107	0.009843	0.165132	77		-0.04546	0.203693	115	-0.0111	0.196981	105	0.00836	0.175588	78
-69	-0.02392	0.162164	120	0.013978	0.179977	107	0.010512	0.170131	77		-0.04715	0.209174	115	-0.01246	0.202368	105	0.010072	0.176814	78
-68	-0.02307	0.165882	120	0.013727	0.183831	107	0.011043	0.175474	77		-0.04868	0.214105	115	-0.0138	0.207171	105	0.01212	0.177452	78
-67	-0.02188	0.169467	120	0.013498	0.187391	107	0.011616	0.181072	77		-0.05011	0.218618	115	-0.01512	0.211522	105	0.014518	0.177745	78
-66	-0.02036	0.173103	120	0.01321	0.190965	107	0.012359	0.186609	77		-0.05142	0.222823	115	-0.01646	0.215513	105	0.017169	0.177874	78
-65	-0.01851	0.176872	120	0.012732	0.194794	107	0.013316	0.191715	77		-0.05252	0.226765	115	-0.01786	0.219224	105	0.019848	0.178021	78
-64	-0.01631	0.180781	120	0.011952	0.198989	107	0.014477	0.196149	77		-0.05332	0.230391	115	-0.01931	0.222719	105	0.022257	0.178401	78
-63	-0.01381	0.184811	120	0.010812	0.203494	107	0.015816	0.199907	77		-0.05375	0.233536	115	-0.0208	0.226022	105	0.024132	0.179213	78
-62	-0.01108	0.188963	120	0.009313	0.208095	107	0.017309	0.203194	77		-0.05376	0.235962	115	-0.02228	0.229129	105	0.025341	0.180585	78
-61	-0.00823	0.193268	120	0.0075	0.2125	107	0.01893	0.206306	77		-0.05332	0.237461	115	-0.02373	0.232024	105	0.02589	0.18257	78
-60	-0.00538	0.197757	120	0.005461	0.216441	107	0.020668	0.209497	77		-0.05241	0.237995	115	-0.02516	0.234689	105	0.025869	0.185205	78
-59	-0.00266	0.202431	120	0.003312	0.21972	107	0.022551	0.212874	77		-0.05108	0.237753	115	-0.02662	0.237096	105	0.025394	0.188607	78
-58	-0.00021	0.207277	120	0.001165	0.222205	107	0.024655	0.21635	77		-0.04947	0.237098	115	-0.0281	0.239229	105	0.024621	0.192981	78
-57	0.001839	0.212273	120	-0.00089	0.223854	107	0.027073	0.219708	77		-0.04775	0.236426	115	-0.02954	0.241128	105	0.023769	0.198486	78
-56	0.003401	0.217395	120	-0.00281	0.224725	107	0.029838	0.222711	77		-0.04612	0.236038	115	-0.03083	0.242904	105	0.023073	0.205109	78
-55	0.004426	0.222631	120	-0.00457	0.224967	107	0.03289	0.225196	77		-0.04469	0.236124	115	-0.03185	0.244723	105	0.0227	0.21264	78
-54	0.004914	0.227979	120	-0.00613	0.224789	107	0.036091	0.227083	77		-0.04352	0.236826	115	-0.03248	0.246782	105	0.022696	0.22077	78
-53	0.0049	0.233431	120	-0.00748	0.224441	107	0.039267	0.228336	77		-0.04259	0.238288	115	-0.03269	0.249282	105	0.02299	0.229177	78
-52	0.004457	0.238936	120	-0.00855	0.2242	107	0.042241	0.228918	77		-0.04186	0.240631	115	-0.0325	0.252372	105	0.023442	0.237575	78
-51	0.003703	0.244359	120	-0.00929	0.224325	107	0.044865	0.228786	77		-0.0413	0.243875	115	-0.03199	0.256093	105	0.023883	0.24568	78
-50	0.002804	0.249498	120	-0.00961	0.224988	107	0.04705	0.227976	77		-0.04087	0.24789	115	-0.03129	0.260374	105	0.024149	0.253185	78
-49	0.001956	0.254151	120	-0.00943	0.226224	107	0.048788	0.226717	77		-0.04056	0.252424	115	-0.03051	0.265046	105	0.024105	0.259818	78
-48	0.001376	0.258184	120	-0.00871	0.227916	107	0.050171	0.225442	77		-0.04035	0.257168	115	-0.02977	0.26986	105	0.023664	0.265454	78
-47	0.001279	0.261568	120	-0.00739	0.229848	107	0.051402	0.224663	77		-0.04028	0.261815	115	-0.02915	0.274513	105	0.022811	0.270165	78
-46	0.001826	0.264332	120	-0.00548	0.231799	107	0.052722	0.224817	77		-0.04034	0.266125	115	-0.02868	0.278695	105	0.021596	0.27417	78
-45	0.003077	0.26648	120	-0.00302	0.233644	107	0.054298	0.226118	77		-0.04053	0.269988	115	-0.02834	0.282181	105	0.020128	0.277679	78
-44	0.004998	0.267949	120	-5.75e-05	0.23541	107	0.056154	0.22849	77		-0.04078	0.273416	115	-0.0281	0.284911	105	0.01857	0.280722	78
-43	0.007493	0.268653	120	0.00329	0.237243	107	0.058198	0.23165	77		-0.04104	0.276517	115	-0.02792	0.287022	105	0.017137	0.283137	78
-42	0.010425	0.268583	120	0.00689	0.239286	107	0.060272	0.235226	77		-0.04125	0.279454	115	-0.02769	0.288825	105	0.016033	0.284722	78
-41	0.013628	0.267865	120	0.010569	0.241584	107	0.06217	0.238873	77		-0.04139	0.28245	115	-0.02726	0.2907	105	0.015375	0.285458	78
-40	0.01693	0.266755	120	0.014171	0.244098	107	0.063628	0.242389	77		-0.04142	0.28578	115	-0.02645	0.292966	105	0.015152	0.285671	78
-39	0.020184	0.265577	120	0.017601	0.24679	107	0.064366	0.24577	77		-0.04133	0.289722	115	-0.02507	0.295777	105	0.015259	0.286026	78
-38	0.023299	0.264635	120	0.020819	0.24967	107	0.064171	0.249129	77		-0.04105	0.294476	115	-0.02301	0.299092	105	0.015561	0.287253	78
-37	0.026263	0.264171	120	0.023784	0.252792	107	0.062936	0.252537	77		-0.04051	0.300103	115	-0.02022	0.302739	105	0.01594	0.289815	78
-36	0.029127	0.26436	120	0.026423	0.256234	107	0.060642	0.255945	77		-0.03957	0.306494	115	-0.01677	0.306523	105	0.016316	0.293751	78
-35	0.031949	0.265322	120	0.028626	0.260063	107	0.057345	0.259219	77		-0.03815	0.313364	115	-0.01284	0.310339	105	0.016649	0.298741	78
-34	0.03472	0.267127	120	0.030253	0.26429	107	0.053181	0.262212	77		-0.03622	0.320317	115	-0.00863	0.314209	105	0.016953	0.304263	78
-33	0.037336	0.269789	120	0.031155	0.268856	107	0.048356	0.264882	77		-0.03384	0.326954	115	-0.00441	0.318262	105	0.01731	0.309756	78
-32	0.03964	0.273266	120	0.031204	0.27366	107	0.043122	0.267381	77		-0.0311	0.332995	115	-0.00037	0.322651	105	0.017844	0.314795	78
-31	0.041488	0.277471	120	0.030312	0.278597	107	0.037725	0.270046	77		-0.0281	0.33833	115	0.003314	0.327455	105	0.018658	0.319202	78
-30	0.04278	0.282286	120	0.028451	0.283635	107	0.032356	0.27328	77		-0.02489	0.343002	115	0.006594	0.332634	105	0.019794	0.323033	78
-29	0.043448	0.287596	120	0.025664	0.288849	107	0.02717	0.277432	77		-0.02152	0.347151	115	0.009468	0.338049	105	0.021263	0.326454	78
-28	0.043445	0.293313	120	0.022044	0.294391	107	0.022329	0.282665	77		-0.018	0.350943	115	0.011968	0.343535	105	0.02306	0.329606	78
-27	0.042749	0.299372	120	0.017717	0.300426	107	0.018023	0.288918	77		-0.01435	0.3545	115	0.014126	0.348938	105	0.025162	0.332501	78
-26	0.041379	0.305707	120	0.012815	0.307085	107	0.014436	0.295994	77		-0.01053	0.357881	115	0.015963	0.35413	105	0.027531	0.335065	78
-25	0.039408	0.312218	120	0.007487	0.314436	107	0.011706	0.303748	77		-0.00644	0.361114	115	0.017502	0.359001	105	0.030108	0.337268	78
-24	0.036926	0.318762	120	0.001905	0.322433	107	0.009852	0.312205	77		-0.00192	0.364234	115	0.018798	0.363461	105	0.03278	0.339232	78
-23	0.033997	0.325184	120	-0.00373	0.330888	107	0.008743	0.321512	77		0.003255	0.367295	115	0.019939	0.367467	105	0.035365	0.341213	78
-22	0.03063	0.331355	120	-0.00921	0.339492	107	0.008138	0.33174	77		0.009246	0.370383	115	0.021042	0.37106	105	0.03769	0.343517	78
-21	0.026805	0.337179	120	-0.01434	0.347889	107	0.007755	0.342707	77		0.01617	0.373592	115	0.022231	0.374378	105	0.039664	0.346417	78
-20	0.022531	0.34259	120	-0.01899	0.355774	107	0.007305	0.353944	77		0.024071	0.376988	115	0.023628	0.377638	105	0.041289	0.350085	78
-19	0.01787	0.347572	120	-0.02316	0.362989	107	0.006536	0.364828	77		0.032926	0.380585	115	0.025359	0.381075	105	0.042608	0.354536	78
-18	0.012926	0.352185	120	-0.02691	0.369562	107	0.005264	0.374782	77		0.042674	0.384343	115	0.027559	0.384895	105	0.043646	0.359629	78
-17	0.007822	0.356586	120	-0.03037	0.37567	107	0.003376	0.383422	77		0.053255	0.388188	115	0.030363	0.389257	105	0.044374	0.365116	78
-16	0.002708	0.360997	120	-0.03358	0.381552	107	0.00085	0.390592	77		0.064639	0.392049	115	0.033888	0.394269	105	0.04471	0.370719	78
-15	-0.00222	0.365673	120	-0.03651	0.387442	107	-0.00222	0.396356	77		0.076825	0.395883	115	0.038217	0.399989	105	0.044536	0.376208	78
-14	-0.0067	0.370865	120	-0.03905	0.393514	107	-0.00563	0.400919	77		0.089822	0.399688	115	0.043386	0.406416	105	0.043717	0.381461	78
-13	-0.01049	0.37678	120	-0.04098	0.399858	107	-0.00912	0.404484	77		0.103621	0.403485	115	0.049387	0.413485	105	0.042158	0.386474	78
-12	-0.01335	0.383554	120	-0.04201	0.406465	107	-0.0125	0.40711	77		0.118154	0.407303	115	0.056169	0.421054	105	0.039879	0.391351	78
-11	-0.0151	0.39125	120	-0.04176	0.413273	107	-0.01568	0.408697	77		0.133289	0.411209	115	0.063647	0.428923	105	0.037022	0.396312	78
-10	-0.01564	0.39987	120	-0.03985	0.420245	107	-0.01867	0.409134	77		0.148848	0.415341	115	0.071693	0.436882	105	0.033774	0.401672	78
-9	-0.01496	0.409374	120	-0.03596	0.427484	107	-0.02155	0.408529	77		0.164633	0.41993	115	0.080139	0.444755	105	0.030286	0.407765	78
-8	-0.01312	0.419685	120	-0.0299	0.435288	107	-0.02435	0.40735	77		0.180414	0.425268	115	0.088799	0.452418	105	0.02662	0.414823	78
-7	-0.01028	0.43069	120	-0.02172	0.444087	107	-0.02703	0.406367	77		0.195922	0.431659	115	0.097489	0.459803	105	0.022761	0.422881	78
-6	-0.00669	0.442245	120	-0.01169	0.454258	107	-0.02949	0.40644	77		0.210867	0.43933	115	0.106023	0.466891	105	0.018674	0.431775	78
-5	-0.00269	0.454195	120	-0.00042	0.465893	107	-0.03158	0.40827	77		0.224965	0.44832	115	0.11423	0.473694	105	0.014367	0.441239	78
-4	0.001377	0.466363	120	0.011247	0.478637	107	-0.03318	0.412274	77		0.238009	0.458426	115	0.121962	0.480246	105	0.009915	0.451046	78
-3	0.005175	0.478542	120	0.022333	0.491703	107	-0.03413	0.418585	77		0.249908	0.469254	115	0.129083	0.486605	105	0.005459	0.461098	78
-2	0.008487	0.490513	120	0.031863	0.50407	107	-0.0343	0.427091	77		0.260665	0.480365	115	0.135462	0.492849	105	0.00118	0.471411	78
-1	0.011218	0.502088	120	0.039046	0.514794	107	-0.03362	0.437488	77		0.270324	0.491392	115	0.140966	0.499074	105	-0.00276	0.482086	78
0	0.013385	0.513148	120	0.043388	0.52328	107	-0.03209	0.449364	77		0.278914	0.502111	115	0.145465	0.505414	105	-0.00628	0.493283	78
1	0.016156	0.50544	120	0.045689	0.509209	107	-0.02965	0.443422	77		0.270839	0.489504	115	0.13866	0.491746	105	-0.01441	0.483561	78
2	0.018577	0.496741	120	0.044956	0.494511	107	-0.02842	0.437792	77		0.260713	0.477607	115	0.130889	0.478618	105	-0.02305	0.473921	78
3	0.020769	0.487421	120	0.041449	0.479845	107	-0.02883	0.431928	77		0.24883	0.466739	115	0.122417	0.466355	105	-0.03226	0.464556	78
4	0.022739	0.477936	120	0.03565	0.465917	107	-0.0312	0.425509	77		0.235363	0.457009	115	0.113478	0.455224	105	-0.04207	0.455729	78
5	0.02443	0.468708	120	0.028159	0.45321	107	-0.03566	0.418468	77		0.220395	0.448289	115	0.104237	0.445418	105	-0.05241	0.447681	78
6	0.025754	0.460014	120	0.019591	0.441833	107	-0.04218	0.41098	77		0.203972	0.440293	115	0.094784	0.437064	105	-0.06314	0.44054	78
7	0.026615	0.451948	120	0.010485	0.43159	107	-0.05052	0.403421	77		0.186164	0.432713	115	0.085154	0.43022	105	-0.07408	0.434257	78
8	0.026925	0.44443	120	0.001265	0.422193	107	-0.06035	0.396268	77		0.167107	0.42536	115	0.07534	0.42484	105	-0.08505	0.428642	78
9	0.026614	0.437251	120	-0.00776	0.41344	107	-0.0712	0.38995	77		0.147014	0.418215	115	0.065325	0.420746	105	-0.0958	0.423438	78
10	0.025639	0.430129	120	-0.01638	0.405271	107	-0.08259	0.384722	77		0.126185	0.411367	115	0.055094	0.417644	105	-0.10606	0.418379	78
11	0.023995	0.422779	120	-0.02445	0.397741	107	-0.094	0.380624	77		0.105003	0.404892	115	0.044633	0.415171	105	-0.11559	0.413181	78
12	0.021696	0.414985	120	-0.03184	0.390964	107	-0.10494	0.377538	77		0.083908	0.398785	115	0.03392	0.412923	105	-0.12429	0.407536	78
13	0.018737	0.406664	120	-0.03845	0.385043	107	-0.11501	0.375281	77		0.063324	0.392977	115	0.022938	0.410482	105	-0.13206	0.401188	78
14	0.015085	0.397906	120	-0.04416	0.380028	107	-0.12396	0.373697	77		0.043585	0.387395	115	0.011717	0.40746	105	-0.13887	0.394041	78
15	0.010712	0.388931	120	-0.0489	0.375913	107	-0.13168	0.372704	77		0.024906	0.381983	115	0.000363	0.403532	105	-0.14469	0.386208	78
16	0.005632	0.380004	120	-0.05258	0.372645	107	-0.13817	0.372263	77		0.007401	0.376698	115	-0.01096	0.398454	105	-0.14953	0.377933	78
17	-6.54e-05	0.371375	120	-0.05517	0.370084	107	-0.14355	0.372318	77		-0.00888	0.371496	115	-0.02207	0.392125	105	-0.15342	0.369461	78
18	-0.00622	0.363248	120	-0.05668	0.36799	107	-0.14798	0.372748	77		-0.02394	0.366328	115	-0.0328	0.384638	105	-0.15645	0.360953	78
19	-0.01262	0.35576	120	-0.05718	0.366081	107	-0.15157	0.373321	77		-0.03777	0.361138	115	-0.04303	0.376294	105	-0.15866	0.352572	78
20	-0.01901	0.34899	120	-0.05679	0.364122	107	-0.15436	0.373711	77		-0.05041	0.355891	115	-0.05269	0.36751	105	-0.16002	0.344624	78
21	-0.02515	0.343	120	-0.05568	0.361939	107	-0.15624	0.373577	77		-0.0619	0.350581	115	-0.06176	0.358692	105	-0.16041	0.33754	78
22	-0.03085	0.337852	120	-0.0541	0.359353	107	-0.15701	0.37268	77		-0.07231	0.345251	115	-0.07023	0.350112	105	-0.15967	0.331666	78
23	-0.03591	0.333585	120	-0.05229	0.356141	107	-0.15644	0.370943	77		-0.08175	0.339989	115	-0.07805	0.341874	105	-0.15772	0.327086	78
24	-0.04021	0.33019	120	-0.05049	0.352066	107	-0.15438	0.368441	77		-0.09033	0.334916	115	-0.08514	0.333948	105	-0.1545	0.323628	78
25	-0.0437	0.327618	120	-0.04892	0.346929	107	-0.15083	0.365327	77		-0.09811	0.33016	115	-0.09136	0.326234	105	-0.14999	0.320968	78
26	-0.0464	0.325792	120	-0.04769	0.340631	107	-0.14592	0.361732	77		-0.10515	0.325839	115	-0.09659	0.318606	105	-0.14424	0.318709	78
27	-0.04837	0.324616	120	-0.04685	0.333186	107	-0.13984	0.357707	77		-0.11148	0.322047	115	-0.10073	0.310981	105	-0.13736	0.316487	78
28	-0.0497	0.323973	120	-0.04638	0.324734	107	-0.13275	0.353257	77		-0.11715	0.318816	115	-0.10377	0.303355	105	-0.12952	0.314093	78
29	-0.05042	0.323741	120	-0.04615	0.315547	107	-0.12479	0.348416	77		-0.12219	0.316088	115	-0.10578	0.295779	105	-0.12085	0.311521	78
30	-0.05059	0.323802	120	-0.04596	0.306025	107	-0.11604	0.343248	77		-0.12667	0.313714	115	-0.10683	0.288313	105	-0.11144	0.308904	78
31	-0.05027	0.32403	120	-0.04554	0.296661	107	-0.10661	0.337793	77		-0.1307	0.311433	115	-0.10701	0.281006	105	-0.10139	0.306394	78
32	-0.04949	0.324287	120	-0.0446	0.287946	107	-0.09654	0.332036	77		-0.13438	0.308875	115	-0.10637	0.273905	105	-0.09078	0.304052	78
33	-0.04828	0.324425	120	-0.04285	0.280246	107	-0.08589	0.325926	77		-0.13775	0.305641	115	-0.10494	0.267105	105	-0.07971	0.301821	78
34	-0.04662	0.324296	120	-0.04006	0.27373	107	-0.07475	0.319434	77		-0.14078	0.301432	115	-0.10275	0.260801	105	-0.06829	0.299566	78
35	-0.04455	0.323727	120	-0.03609	0.268373	107	-0.06323	0.312589	77		-0.14337	0.296167	115	-0.09984	0.255274	105	-0.05667	0.297125	78
36	-0.04214	0.322504	120	-0.03095	0.264047	107	-0.05148	0.305444	77		-0.14533	0.289992	115	-0.09628	0.250822	105	-0.04503	0.29432	78
37	-0.0395	0.320352	120	-0.02478	0.260607	107	-0.03973	0.297954	77		-0.14643	0.283195	115	-0.09211	0.247652	105	-0.03353	0.290971	78
38	-0.03669	0.316961	120	-0.01788	0.25795	107	-0.02829	0.289907	77		-0.14642	0.276121	115	-0.08741	0.245795	105	-0.02235	0.286931	78
39	-0.03379	0.312044	120	-0.01064	0.256	107	-0.01753	0.281035	77		-0.14505	0.269125	115	-0.08226	0.24509	105	-0.01168	0.282159	78
40	-0.0308	0.305429	120	-0.00353	0.254658	107	-0.00788	0.271176	77		-0.14214	0.262572	115	-0.07672	0.245242	105	-0.00168	0.276746	78
41	-0.02775	0.297159	120	0.00301	0.253753	107	0.000307	0.260405	77		-0.13763	0.25682	115	-0.07086	0.245924	105	0.007464	0.270908	78
42	-0.02464	0.287548	120	0.008635	0.253048	107	0.006822	0.249058	77		-0.13158	0.252156	115	-0.06472	0.246856	105	0.01559	0.264939	78
43	-0.0215	0.277204	120	0.013154	0.252306	107	0.011606	0.23767	77		-0.12421	0.248712	115	-0.0584	0.247834	105	0.022581	0.259142	78
44	-0.01834	0.266958	120	0.016547	0.251379	107	0.014765	0.226924	77		-0.11588	0.246436	115	-0.05197	0.248732	105	0.028468	0.253722	78
45	-0.01525	0.257653	120	0.018937	0.250238	107	0.016557	0.217645	77		-0.10701	0.245129	115	-0.04553	0.249524	105	0.033457	0.248731	78
46	-0.01238	0.249926	120	0.020528	0.24893	107	0.017397	0.210767	77		-0.09797	0.244529	115	-0.03915	0.250261	105	0.037862	0.244097	78
47	-0.00987	0.244085	120	0.021534	0.247532	107	0.01784	0.207136	77		-0.08904	0.244401	115	-0.03291	0.250992	105	0.04198	0.23971	78
48	-0.00777	0.24013	120	0.022137	0.246126	107	0.018509	0.207159	77		-0.08042	0.244596	115	-0.02691	0.251683	105	0.046017	0.235499	78
49	-0.00603	0.237805	120	0.022496	0.244826	107	0.019983	0.210527	77		-0.07217	0.245016	115	-0.02125	0.252194	105	0.050073	0.231501	78
50	-0.00454	0.236679	120	0.022757	0.243798	107	0.022695	0.216204	77		-0.06426	0.245562	115	-0.01599	0.252329	105	0.054162	0.227893	78
51	-0.00315	0.236233	120	0.023021	0.243225	107	0.026884	0.22281	77		-0.05661	0.246095	115	-0.01118	0.251884	105	0.058237	0.224937	78
52	-0.00174	0.235968	120	0.023312	0.243221	107	0.032612	0.229129	77		-0.04917	0.246451	115	-0.00683	0.2507	105	0.062238	0.222841	78
53	-0.00022	0.235479	120	0.023593	0.243769	107	0.039763	0.234352	77		-0.04194	0.246484	115	-0.00299	0.248718	105	0.066127	0.221634	78
54	0.001441	0.234499	120	0.023795	0.24472	107	0.048039	0.238047	77		-0.03498	0.246122	115	0.000319	0.245988	105	0.069873	0.221178	78
55	0.003266	0.232909	120	0.023837	0.245842	107	0.05698	0.240045	77		-0.02836	0.245388	115	0.003054	0.242628	105	0.073406	0.221263	78
56	0.005238	0.230723	120	0.023645	0.246865	107	0.066047	0.240391	77		-0.02214	0.244379	115	0.005208	0.238764	105	0.076588	0.22167	78
57	0.007331	0.228048	120	0.02317	0.247521	107	0.074733	0.239311	77		-0.01636	0.243208	115	0.006825	0.23449	105	0.079257	0.222204	78
58	0.009499	0.225046	120	0.022413	0.247572	107	0.082641	0.23713	77		-0.01106	0.241946	115	0.008043	0.229872	105	0.081286	0.222721	78
59	0.01167	0.221922	120	0.021427	0.24683	107	0.089481	0.234228	77		-0.00625	0.240604	115	0.00907	0.224993	105	0.082623	0.223133	78
60	0.01375	0.218873	120	0.020307	0.245161	107	0.095043	0.231023	77		-0.00194	0.239153	115	0.010124	0.219981	105	0.083283	0.223342	78
61	0.015622	0.216025	120	0.019158	0.242508	107	0.09921	0.227921	77		0.001923	0.237543	115	0.011387	0.214986	105	0.08331	0.223231	78
62	0.017171	0.213401	120	0.018065	0.238899	107	0.102004	0.225214	77		0.005429	0.235688	115	0.012982	0.210127	105	0.082728	0.222723	78
63	0.018323	0.210947	120	0.017084	0.234434	107	0.103565	0.222956	77		0.008692	0.233466	115	0.014949	0.20546	105	0.081539	0.221845	78
64	0.01908	0.208588	120	0.016262	0.229243	107	0.104095	0.220885	77		0.011784	0.230745	115	0.01723	0.200981	105	0.07975	0.220708	78
65	0.019493	0.206242	120	0.015655	0.223466	107	0.103784	0.21849	77		0.014706	0.227434	115	0.0197	0.196629	105	0.077412	0.219395	78
66	0.019626	0.203807	120	0.015333	0.217214	107	0.102743	0.215242	77		0.017389	0.223473	115	0.022214	0.192269	105	0.074616	0.217885	78
67	0.019537	0.201134	120	0.015383	0.210561	107	0.10099	0.210818	77		0.019707	0.218798	115	0.024641	0.187711	105	0.071482	0.216024	78
68	0.019282	0.198042	120	0.01591	0.203569	107	0.098489	0.205183	77		0.021544	0.213307	115	0.026861	0.18275	105	0.068133	0.213561	78
69	0.018899	0.194352	120	0.016993	0.196336	107	0.09522	0.198512	77		0.022849	0.206898	115	0.028756	0.177204	105	0.064685	0.210198	78
70	0.018396	0.189916	120	0.018604	0.188988	107	0.091232	0.191053	77		0.023658	0.199527	115	0.030233	0.170972	105	0.061244	0.205612	78
71	0.017764	0.184641	120	0.020575	0.181598	107	0.086644	0.183002	77		0.024064	0.191221	115	0.031217	0.16408	105	0.057891	0.199477	78
72	0.016992	0.178473	120	0.02264	0.17413	107	0.081577	0.174435	77		0.024181	0.18205	115	0.03165	0.156671	105	0.054629	0.191537	78
73	0.016059	0.171332	120	0.024504	0.166415	107	0.076101	0.165279	77		0.024094	0.172069	115	0.031485	0.148903	105	0.051371	0.181682	78
74	0.014945	0.163056	120	0.025897	0.15816	107	0.070215	0.155354	77		0.023817	0.161283	115	0.030702	0.140843	105	0.047968	0.169996	78
75	0.013641	0.153422	120	0.026594	0.149012	107	0.063866	0.144477	77		0.023316	0.149651	115	0.029326	0.132408	105	0.044256	0.156731	78
76	0.012168	0.142206	120	0.026436	0.138661	107	0.057018	0.132547	77		0.022538	0.137097	115	0.027429	0.123366	105	0.040134	0.142207	78
77	0.010575	0.12926	120	0.025346	0.126885	107	0.049723	0.119525	77		0.021428	0.123522	115	0.025114	0.113383	105	0.035605	0.12672	78
78	0.008925	0.114547	120	0.023341	0.113564	107	0.04213	0.105379	77		0.01994	0.108839	115	0.022476	0.102115	105	0.03077	0.1105	78
79	0.007267	0.098166	120	0.020528	0.098653	107	0.034428	0.090084	77		0.018026	0.093014	115	0.019565	0.089285	105	0.025769	0.09371	78
80	0.005636	0.08033	120	0.017067	0.082128	107	0.026795	0.073692	77		0.015636	0.076104	115	0.016388	0.074745	105	0.020706	0.076419	78
81	0.004065	0.06133	120	0.013132	0.063954	107	0.019399	0.056363	77		0.012711	0.058226	115	0.01291	0.058476	105	0.015608	0.058596	78
82	0.002591	0.041462	120	0.008881	0.044133	107	0.012396	0.038291	77		0.009181	0.039511	115	0.009067	0.040546	105	0.01047	0.040083	78
83	0.001236	0.020963	120	0.004456	0.022758	107	0.005909	0.019555	77		0.004972	0.020074	115	0.004786	0.021036	105	0.005279	0.020624	78

## Sheet: Figure8D
			Saline						Diazepam
		Risk of shock(%)	Mean (peak of cross correlation function)	SD	N	95% CI (lower,upper)		Risk of shock(%)	Mean (peak of cross correlation function)	SD	N	95% CI (lower,upper)
		0	-0.05059	0.324616	120	(-.11, .01)		0	0.278914	0.469254	115	(.19, .36)
		6	-0.05718	0.372645	107	(-.13, .01)		6	0.145465	0.486605	105	(.05, .24)
		10	-0.15701	0.373321	77	(-.24, -.07)		10	-0.16041	0.360953	78	(-.24, -.08)

## Sheet: Figure 8E-G
					SALINE									DIAZEPAM
				Peri-reward cross correlation									Peri-reward cross correlation
											0			6			10
Lag (1 unit = .0244 sec)	Mean	SD	N	Mean	SD	N	Mean	SD	N		Mean	SD	N	Mean	SD	N	Mean	SD	N
-162	0.003167	0.009577	120	0.000143	0.009535	107	0.006342	0.011296	77		0.003203	0.00828	115	0.001296	0.008872	105	0.001202	0.007569	78
-161	0.006332	0.018775	120	0.000309	0.01872	107	0.012373	0.022364	77		0.006428	0.016478	115	0.002552	0.017437	105	0.002343	0.014909	78
-160	0.009456	0.027592	120	0.000487	0.027593	107	0.018035	0.033166	77		0.009641	0.024574	115	0.003757	0.025704	105	0.003386	0.022012	78
-159	0.012501	0.036036	120	0.000663	0.036181	107	0.023278	0.043666	77		0.012798	0.032541	115	0.004889	0.033682	105	0.004302	0.028877	78
-158	0.015438	0.044118	120	0.000823	0.044507	107	0.028074	0.053826	77		0.015857	0.040348	115	0.005921	0.04139	105	0.005069	0.035505	78
-157	0.01825	0.051861	120	0.000938	0.05258	107	0.032418	0.063601	77		0.018788	0.047951	115	0.006808	0.048853	105	0.005669	0.041897	78
-156	0.020924	0.059298	120	0.00097	0.06039	107	0.03633	0.072945	77		0.021568	0.055293	115	0.007496	0.056092	105	0.006081	0.048059	78
-155	0.02345	0.066479	120	0.000887	0.067905	107	0.039846	0.081823	77		0.024176	0.062316	115	0.007929	0.063115	105	0.006284	0.05399	78
-154	0.025821	0.073445	120	0.000672	0.075088	107	0.042992	0.090226	77		0.026585	0.068972	115	0.008058	0.069908	105	0.006264	0.059678	78
-153	0.028033	0.080217	120	0.000325	0.081911	107	0.04578	0.098173	77		0.028761	0.075224	115	0.007855	0.076448	105	0.006032	0.065114	78
-152	0.030092	0.08678	120	-0.00015	0.088365	107	0.048198	0.105712	77		0.030674	0.081043	115	0.007316	0.082697	105	0.005615	0.070293	78
-151	0.032015	0.093088	120	-0.00076	0.094462	107	0.05024	0.112905	77		0.032295	0.086415	115	0.006463	0.088617	105	0.005047	0.075223	78
-150	0.033827	0.099074	120	-0.00149	0.100221	107	0.051927	0.119799	77		0.033597	0.091333	115	0.00533	0.09417	105	0.004355	0.079918	78
-149	0.035544	0.104674	120	-0.00234	0.105653	107	0.053317	0.12641	77		0.034567	0.095811	115	0.003964	0.099327	105	0.003552	0.084384	78
-148	0.037178	0.109851	120	-0.00327	0.110757	107	0.054477	0.132717	77		0.035211	0.099884	115	0.002413	0.104073	105	0.002645	0.088619	78
-147	0.038729	0.114597	120	-0.00426	0.115531	107	0.05546	0.138678	77		0.035559	0.103615	115	0.000732	0.108404	105	0.001644	0.092621	78
-146	0.040195	0.118921	120	-0.00525	0.119989	107	0.056295	0.144241	77		0.035654	0.107088	115	-0.00103	0.112329	105	0.000564	0.096399	78
-145	0.041574	0.122852	120	-0.00618	0.124159	107	0.056987	0.149359	77		0.035545	0.110395	115	-0.00284	0.115866	105	-0.00058	0.099973	78
-144	0.042862	0.12643	120	-0.00702	0.12807	107	0.057521	0.154003	77		0.03527	0.113616	115	-0.00465	0.119043	105	-0.00175	0.103368	78
-143	0.044053	0.1297	120	-0.00772	0.131742	107	0.057861	0.158168	77		0.034861	0.116818	115	-0.00643	0.121891	105	-0.00295	0.106613	78
-142	0.045139	0.132704	120	-0.00825	0.135189	107	0.05797	0.161882	77		0.034334	0.120058	115	-0.00816	0.124442	105	-0.00414	0.109737	78
-141	0.046106	0.135473	120	-0.00858	0.138443	107	0.057815	0.165203	77		0.033699	0.123387	115	-0.00979	0.126726	105	-0.00532	0.112761	78
-140	0.046947	0.138025	120	-0.00868	0.141557	107	0.057369	0.168197	77		0.032964	0.126841	115	-0.0113	0.128755	105	-0.00644	0.115694	78
-139	0.047655	0.140373	120	-0.00856	0.144599	107	0.056606	0.170924	77		0.032143	0.130446	115	-0.01268	0.130525	105	-0.00747	0.118531	78
-138	0.048228	0.142532	120	-0.00827	0.147636	107	0.055508	0.173421	77		0.031252	0.134213	115	-0.01393	0.132018	105	-0.0084	0.121257	78
-137	0.048661	0.144535	120	-0.00785	0.150719	107	0.054072	0.175709	77		0.030304	0.138148	115	-0.01504	0.133215	105	-0.00923	0.123856	78
-136	0.048943	0.146435	120	-0.00735	0.153872	107	0.052318	0.177794	77		0.029305	0.142238	115	-0.01604	0.134116	105	-0.00998	0.126327	78
-135	0.049065	0.148291	120	-0.00685	0.157084	107	0.05028	0.179684	77		0.028256	0.146454	115	-0.01694	0.134751	105	-0.01071	0.128692	78
-134	0.049022	0.150149	120	-0.00637	0.160307	107	0.048	0.181404	77		0.027151	0.150746	115	-0.01777	0.135179	105	-0.01145	0.130985	78
-133	0.048807	0.15202	120	-0.00595	0.163468	107	0.045518	0.182999	77		0.025976	0.155043	115	-0.01856	0.135468	105	-0.01225	0.133235	78
-132	0.048416	0.153884	120	-0.00561	0.166496	107	0.042877	0.184533	77		0.024702	0.159273	115	-0.01933	0.135689	105	-0.01313	0.135458	78
-131	0.047848	0.155702	120	-0.0054	0.169341	107	0.040116	0.186073	77		0.023297	0.163378	115	-0.0201	0.135901	105	-0.01409	0.137654	78
-130	0.047111	0.157434	120	-0.00534	0.171976	107	0.037251	0.187674	77		0.021729	0.16733	115	-0.02089	0.136148	105	-0.01512	0.13981	78
-129	0.046225	0.159057	120	-0.00544	0.174396	107	0.034267	0.189365	77		0.019978	0.171119	115	-0.02171	0.136465	105	-0.01623	0.141905	78
-128	0.04522	0.160571	120	-0.00571	0.176626	107	0.031117	0.19114	77		0.018032	0.174744	115	-0.02253	0.136881	105	-0.0174	0.143918	78
-127	0.044126	0.161999	120	-0.00613	0.178717	107	0.027733	0.192947	77		0.015886	0.178205	115	-0.02335	0.137428	105	-0.01865	0.145843	78
-126	0.042966	0.163382	120	-0.00668	0.180737	107	0.024043	0.194702	77		0.013532	0.18149	115	-0.02414	0.138135	105	-0.01998	0.147697	78
-125	0.041757	0.164765	120	-0.00734	0.182746	107	0.019982	0.196308	77		0.010961	0.184573	115	-0.02492	0.139029	105	-0.02139	0.149511	78
-124	0.040514	0.166173	120	-0.0081	0.184776	107	0.015518	0.197676	77		0.008152	0.18741	115	-0.0257	0.140117	105	-0.02288	0.151324	78
-123	0.039247	0.167604	120	-0.00892	0.18683	107	0.010659	0.19874	77		0.005087	0.189956	115	-0.02653	0.141398	105	-0.02445	0.153181	78
-122	0.037963	0.169026	120	-0.00978	0.188898	107	0.005449	0.199461	77		0.001751	0.192177	115	-0.02746	0.142865	105	-0.0261	0.15513	78
-121	0.036669	0.170392	120	-0.01064	0.190959	107	-3.83e-05	0.199825	77		-0.00186	0.194062	115	-0.02853	0.144527	105	-0.02784	0.157216	78
-120	0.035368	0.171652	120	-0.01147	0.192982	107	-0.00571	0.199836	77		-0.00572	0.195623	115	-0.02978	0.146397	105	-0.02968	0.159467	78
-119	0.034053	0.172772	120	-0.01225	0.194929	107	-0.01147	0.19953	77		-0.00982	0.196886	115	-0.03122	0.148489	105	-0.03163	0.16189	78
-118	0.032702	0.173741	120	-0.01294	0.196765	107	-0.01722	0.198975	77		-0.01413	0.197881	115	-0.03286	0.150803	105	-0.03371	0.164467	78
-117	0.031282	0.174581	120	-0.01353	0.198463	107	-0.02287	0.198273	77		-0.01861	0.198646	115	-0.03468	0.153326	105	-0.03594	0.167164	78
-116	0.029762	0.175344	120	-0.01401	0.200011	107	-0.02836	0.19753	77		-0.02321	0.199217	115	-0.03669	0.156033	105	-0.03833	0.169952	78
-115	0.028114	0.176105	120	-0.01436	0.20142	107	-0.03365	0.196827	77		-0.0279	0.19962	115	-0.03886	0.158889	105	-0.04087	0.172808	78
-114	0.026319	0.176937	120	-0.01461	0.202721	107	-0.03871	0.196203	77		-0.03266	0.199865	115	-0.0412	0.16185	105	-0.04354	0.17573	78
-113	0.024366	0.177891	120	-0.01477	0.203959	107	-0.04355	0.195657	77		-0.03746	0.199948	115	-0.04368	0.164857	105	-0.04635	0.17874	78
-112	0.022241	0.178978	120	-0.01488	0.205182	107	-0.04822	0.195167	77		-0.04231	0.199865	115	-0.04627	0.167844	105	-0.04928	0.181879	78
-111	0.019932	0.180167	120	-0.01496	0.206415	107	-0.05273	0.194713	77		-0.04721	0.199616	115	-0.04891	0.170744	105	-0.05235	0.185198	78
-110	0.017425	0.181398	120	-0.01505	0.207658	107	-0.05713	0.194282	77		-0.05219	0.199219	115	-0.05155	0.173495	105	-0.05554	0.188735	78
-109	0.014715	0.182618	120	-0.0152	0.208887	107	-0.06143	0.193871	77		-0.05727	0.1987	115	-0.05411	0.176044	105	-0.05886	0.192494	78
-108	0.011819	0.183801	120	-0.01544	0.210068	107	-0.06562	0.193476	77		-0.06247	0.198089	115	-0.05653	0.178358	105	-0.06226	0.196439	78
-107	0.008771	0.184948	120	-0.01582	0.21118	107	-0.06971	0.19309	77		-0.06779	0.197414	115	-0.05877	0.180439	105	-0.06577	0.2005	78
-106	0.005622	0.18607	120	-0.0164	0.212227	107	-0.07373	0.192717	77		-0.07325	0.196711	115	-0.06084	0.182336	105	-0.06936	0.204598	78
-105	0.00243	0.187169	120	-0.01725	0.21325	107	-0.07768	0.192384	77		-0.07884	0.196029	115	-0.06278	0.184129	105	-0.07306	0.208664	78
-104	-0.00075	0.188228	120	-0.01839	0.214323	107	-0.08161	0.192151	77		-0.0846	0.195415	115	-0.06467	0.185919	105	-0.07687	0.212647	78
-103	-0.00389	0.189217	120	-0.01983	0.215538	107	-0.08553	0.192095	77		-0.09054	0.194899	115	-0.06658	0.187812	105	-0.0808	0.216509	78
-102	-0.00696	0.1901	120	-0.02156	0.216971	107	-0.08946	0.192294	77		-0.0967	0.194482	115	-0.06859	0.1899	105	-0.08486	0.220218	78
-101	-0.00993	0.190853	120	-0.02352	0.218653	107	-0.09341	0.192806	77		-0.10309	0.194145	115	-0.07078	0.19224	105	-0.089	0.22374	78
-100	-0.01281	0.19147	120	-0.02564	0.220563	107	-0.09737	0.193652	77		-0.10966	0.193873	115	-0.07322	0.194853	105	-0.09315	0.227036	78
-99	-0.01559	0.19196	120	-0.02786	0.222635	107	-0.10134	0.194814	77		-0.11636	0.193677	115	-0.07596	0.197722	105	-0.09724	0.230063	78
-98	-0.0183	0.192347	120	-0.03009	0.224787	107	-0.10531	0.196233	77		-0.12311	0.193601	115	-0.07905	0.200805	105	-0.10118	0.232788	78
-97	-0.02096	0.192658	120	-0.03228	0.226938	107	-0.10927	0.19783	77		-0.12984	0.193701	115	-0.08249	0.204046	105	-0.10492	0.235206	78
-96	-0.02357	0.192921	120	-0.03439	0.229019	107	-0.1132	0.199519	77		-0.1365	0.194029	115	-0.08628	0.207387	105	-0.10838	0.237336	78
-95	-0.02613	0.193172	120	-0.03639	0.23098	107	-0.11709	0.201236	77		-0.14304	0.194612	115	-0.09036	0.21077	105	-0.11155	0.23921	78
-94	-0.02864	0.193442	120	-0.03828	0.232788	107	-0.1209	0.20295	77		-0.14943	0.195455	115	-0.0947	0.214134	105	-0.1144	0.240858	78
-93	-0.03112	0.193757	120	-0.04005	0.23443	107	-0.12464	0.204666	77		-0.15562	0.196552	115	-0.09921	0.217429	105	-0.11698	0.242307	78
-92	-0.03356	0.194134	120	-0.04169	0.235914	107	-0.12831	0.206419	77		-0.16155	0.197891	115	-0.10381	0.220636	105	-0.11934	0.243585	78
-91	-0.03601	0.194579	120	-0.04324	0.237262	107	-0.1319	0.208266	77		-0.16718	0.199462	115	-0.1084	0.22378	105	-0.12157	0.244727	78
-90	-0.03849	0.195097	120	-0.04467	0.238496	107	-0.1354	0.210258	77		-0.17247	0.201256	115	-0.11288	0.226915	105	-0.12374	0.245769	78
-89	-0.04102	0.195696	120	-0.046	0.239627	107	-0.13878	0.212431	77		-0.17742	0.203272	115	-0.11717	0.230086	105	-0.12593	0.24674	78
-88	-0.04358	0.196387	120	-0.04719	0.240662	107	-0.14202	0.214791	77		-0.18203	0.205509	115	-0.12124	0.233308	105	-0.1282	0.247657	78
-87	-0.04616	0.197187	120	-0.04823	0.241606	107	-0.14509	0.217321	77		-0.1863	0.207971	115	-0.12507	0.236557	105	-0.13059	0.248528	78
-86	-0.04871	0.198107	120	-0.04911	0.242467	107	-0.148	0.21999	77		-0.19024	0.210669	115	-0.12866	0.239784	105	-0.1331	0.249353	78
-85	-0.0512	0.199161	120	-0.04987	0.243253	107	-0.15072	0.222764	77		-0.19386	0.213625	115	-0.13203	0.242923	105	-0.13574	0.250111	78
-84	-0.05356	0.200356	120	-0.05055	0.243958	107	-0.15326	0.225609	77		-0.19713	0.216867	115	-0.13519	0.245902	105	-0.13852	0.250757	78
-83	-0.05577	0.201698	120	-0.05121	0.244556	107	-0.15559	0.228492	77		-0.20005	0.220418	115	-0.13817	0.248662	105	-0.14142	0.251216	78
-82	-0.05779	0.203193	120	-0.05195	0.244997	107	-0.15767	0.231379	77		-0.20257	0.224281	115	-0.14096	0.251179	105	-0.14445	0.251408	78
-81	-0.05961	0.204854	120	-0.05281	0.245215	107	-0.15946	0.234238	77		-0.20463	0.22844	115	-0.14358	0.253476	105	-0.14758	0.251271	78
-80	-0.06122	0.206709	120	-0.05386	0.24514	107	-0.1609	0.237035	77		-0.2062	0.232861	115	-0.14602	0.25561	105	-0.15077	0.250775	78
-79	-0.06266	0.208797	120	-0.05511	0.244718	107	-0.16199	0.23974	77		-0.20723	0.237504	115	-0.1483	0.257655	105	-0.15398	0.249929	78
-78	-0.06395	0.211155	120	-0.05657	0.243924	107	-0.16273	0.242321	77		-0.20767	0.242336	115	-0.15042	0.259675	105	-0.15716	0.248777	78
-77	-0.06516	0.213801	120	-0.0582	0.242769	107	-0.16311	0.244741	77		-0.20749	0.247326	115	-0.15237	0.261706	105	-0.16026	0.247387	78
-76	-0.06634	0.216727	120	-0.05999	0.241295	107	-0.16314	0.246961	77		-0.20669	0.25244	115	-0.15412	0.263744	105	-0.16321	0.245827	78
-75	-0.06755	0.21991	120	-0.06188	0.239577	107	-0.1628	0.248953	77		-0.20525	0.257641	115	-0.15564	0.265753	105	-0.16595	0.244154	78
-74	-0.06882	0.223319	120	-0.06381	0.237716	107	-0.16206	0.250702	77		-0.2032	0.262896	115	-0.1569	0.267675	105	-0.16843	0.242419	78
-73	-0.07015	0.226915	120	-0.06572	0.235823	107	-0.16092	0.252213	77		-0.20055	0.268176	115	-0.15786	0.269462	105	-0.1706	0.24067	78
-72	-0.07153	0.230665	120	-0.06751	0.234007	107	-0.15939	0.253518	77		-0.19733	0.27344	115	-0.15849	0.271087	105	-0.1724	0.238955	78
-71	-0.07291	0.234533	120	-0.06912	0.232358	107	-0.15749	0.254682	77		-0.19356	0.278645	115	-0.15877	0.272554	105	-0.17379	0.237319	78
-70	-0.07425	0.238488	120	-0.07048	0.230953	107	-0.15526	0.255791	77		-0.18929	0.28375	115	-0.15867	0.273883	105	-0.17474	0.235791	78
-69	-0.07551	0.242503	120	-0.07154	0.22985	107	-0.15277	0.256938	77		-0.18458	0.288726	115	-0.15818	0.275109	105	-0.17522	0.234371	78
-68	-0.07665	0.246558	120	-0.07226	0.229087	107	-0.15007	0.258212	77		-0.17946	0.293566	115	-0.15729	0.276275	105	-0.17526	0.233046	78
-67	-0.07766	0.25064	120	-0.07262	0.228684	107	-0.14724	0.259689	77		-0.17399	0.298284	115	-0.15602	0.277434	105	-0.17487	0.231806	78
-66	-0.07853	0.254745	120	-0.07261	0.22864	107	-0.14431	0.261421	77		-0.16821	0.302897	115	-0.15439	0.278635	105	-0.17414	0.230673	78
-65	-0.07925	0.258866	120	-0.07227	0.228939	107	-0.14133	0.26343	77		-0.16214	0.30742	115	-0.15243	0.279913	105	-0.17311	0.229702	78
-64	-0.07979	0.263008	120	-0.07161	0.229558	107	-0.13831	0.265704	77		-0.15581	0.311852	115	-0.15018	0.28128	105	-0.17184	0.228967	78
-63	-0.08012	0.267181	120	-0.07069	0.230476	107	-0.13523	0.26819	77		-0.14924	0.316185	115	-0.14768	0.282732	105	-0.17036	0.228542	78
-62	-0.08024	0.271402	120	-0.06955	0.231678	107	-0.13202	0.270804	77		-0.14249	0.3204	115	-0.14494	0.284257	105	-0.16867	0.228475	78
-61	-0.08014	0.275685	120	-0.06822	0.233158	107	-0.1286	0.273446	77		-0.13556	0.324478	115	-0.14198	0.285846	105	-0.16673	0.228783	78
-60	-0.07981	0.280032	120	-0.06675	0.234909	107	-0.12489	0.276041	77		-0.12847	0.328384	115	-0.13877	0.287495	105	-0.1645	0.229441	78
-59	-0.07926	0.284424	120	-0.06513	0.236927	107	-0.12086	0.278574	77		-0.12122	0.332079	115	-0.13528	0.289206	105	-0.16193	0.230407	78
-58	-0.07849	0.288815	120	-0.06334	0.239199	107	-0.11646	0.281116	77		-0.11374	0.335508	115	-0.13149	0.290977	105	-0.15896	0.231638	78
-57	-0.07751	0.293143	120	-0.06134	0.241705	107	-0.11171	0.283799	77		-0.106	0.33861	115	-0.12737	0.2928	105	-0.15552	0.233096	78
-56	-0.07632	0.29735	120	-0.0591	0.244413	107	-0.10663	0.286773	77		-0.09791	0.341318	115	-0.1229	0.294664	105	-0.15155	0.234751	78
-55	-0.07492	0.301397	120	-0.05657	0.247287	107	-0.10128	0.290157	77		-0.0894	0.343581	115	-0.11805	0.296552	105	-0.14696	0.236583	78
-54	-0.07335	0.305278	120	-0.05373	0.250291	107	-0.09571	0.294026	77		-0.08043	0.345372	115	-0.11279	0.29845	105	-0.14167	0.238579	78
-53	-0.07164	0.309009	120	-0.05056	0.253398	107	-0.08996	0.29841	77		-0.07095	0.346691	115	-0.10712	0.300339	105	-0.13561	0.240725	78
-52	-0.06985	0.312616	120	-0.04704	0.256592	107	-0.08406	0.303293	77		-0.06094	0.34756	115	-0.10099	0.302197	105	-0.12873	0.242999	78
-51	-0.06803	0.316119	120	-0.0432	0.25987	107	-0.07803	0.308624	77		-0.05044	0.348007	115	-0.0944	0.304001	105	-0.12102	0.245368	78
-50	-0.06621	0.319517	120	-0.03906	0.263248	107	-0.0719	0.314315	77		-0.0395	0.348064	115	-0.08733	0.30574	105	-0.11246	0.247804	78
-49	-0.06444	0.32279	120	-0.03467	0.266762	107	-0.06569	0.320245	77		-0.0282	0.347763	115	-0.07979	0.307419	105	-0.10309	0.250291	78
-48	-0.06271	0.325895	120	-0.0301	0.270449	107	-0.05946	0.326256	77		-0.01663	0.347122	115	-0.07178	0.309062	105	-0.09298	0.252824	78
-47	-0.06102	0.328778	120	-0.02543	0.274339	107	-0.05324	0.332179	77		-0.00487	0.346142	115	-0.06336	0.310695	105	-0.08224	0.255408	78
-46	-0.05936	0.33139	120	-0.02071	0.278432	107	-0.04707	0.337858	77		0.007013	0.344811	115	-0.05458	0.312347	105	-0.071	0.25805	78
-45	-0.05771	0.333695	120	-0.01598	0.282695	107	-0.04102	0.343183	77		0.018983	0.343122	115	-0.04552	0.314035	105	-0.0594	0.260756	78
-44	-0.05605	0.335678	120	-0.01127	0.287068	107	-0.0351	0.348102	77		0.031018	0.34108	115	-0.03623	0.31577	105	-0.04757	0.263535	78
-43	-0.05437	0.337349	120	-0.00657	0.29147	107	-0.02928	0.35261	77		0.043102	0.338726	115	-0.02675	0.317548	105	-0.03559	0.266403	78
-42	-0.05265	0.338738	120	-0.00188	0.295821	107	-0.02352	0.356739	77		0.055209	0.336139	115	-0.01709	0.31935	105	-0.02355	0.269373	78
-41	-0.05085	0.339896	120	0.002828	0.300059	107	-0.0177	0.360534	77		0.067308	0.333432	115	-0.00727	0.32115	105	-0.01147	0.272449	78
-40	-0.04895	0.340887	120	0.007554	0.304153	107	-0.01175	0.364041	77		0.079367	0.330744	115	0.00273	0.322913	105	0.000614	0.275626	78
-39	-0.04688	0.341779	120	0.012305	0.308109	107	-0.00559	0.3673	77		0.091357	0.328219	115	0.012912	0.324608	105	0.012714	0.278888	78
-38	-0.0446	0.34264	120	0.017074	0.311962	107	0.000802	0.37034	77		0.103262	0.325998	115	0.023273	0.326205	105	0.024832	0.282215	78
-37	-0.04208	0.343537	120	0.021847	0.315759	107	0.007389	0.373167	77		0.11508	0.324199	115	0.033797	0.32767	105	0.036974	0.285593	78
-36	-0.03927	0.344531	120	0.026608	0.319549	107	0.014105	0.375771	77		0.126819	0.322904	115	0.044455	0.328968	105	0.049145	0.28902	78
-35	-0.03616	0.34567	120	0.031341	0.32336	107	0.020858	0.378137	77		0.138483	0.322147	115	0.055206	0.330057	105	0.061357	0.292505	78
-34	-0.03278	0.346987	120	0.036021	0.327196	107	0.02754	0.380263	77		0.150059	0.321919	115	0.066005	0.3309	105	0.07363	0.296053	78
-33	-0.02919	0.3485	120	0.040613	0.331043	107	0.034047	0.382179	77		0.161516	0.322171	115	0.076823	0.331466	105	0.085985	0.299654	78
-32	-0.02548	0.350204	120	0.045065	0.334881	107	0.040291	0.383955	77		0.172806	0.32283	115	0.087654	0.331745	105	0.098437	0.303272	78
-31	-0.02175	0.352079	120	0.049319	0.338691	107	0.046217	0.385677	77		0.183867	0.323806	115	0.098517	0.331745	105	0.110992	0.306845	78
-30	-0.0181	0.354097	120	0.053329	0.342457	107	0.051812	0.387428	77		0.194634	0.325018	115	0.109451	0.331483	105	0.123639	0.310292	78
-29	-0.0146	0.356226	120	0.057069	0.346163	107	0.057104	0.389263	77		0.205046	0.326411	115	0.120503	0.330978	105	0.136354	0.313534	78
-28	-0.01131	0.358433	120	0.060547	0.349799	107	0.06215	0.391203	77		0.215048	0.32796	115	0.131701	0.330251	105	0.149083	0.316509	78
-27	-0.00827	0.36069	120	0.063799	0.353359	107	0.067026	0.393223	77		0.224604	0.329669	115	0.143046	0.329314	105	0.161755	0.319189	78
-26	-0.00547	0.362972	120	0.066888	0.356844	107	0.071808	0.395277	77		0.233697	0.33156	115	0.154516	0.328175	105	0.174291	0.32157	78
-25	-0.0029	0.365258	120	0.069888	0.360261	107	0.076568	0.39731	77		0.242327	0.333655	115	0.166072	0.32685	105	0.18662	0.32368	78
-24	-0.00053	0.367531	120	0.072874	0.363633	107	0.081361	0.399282	77		0.250508	0.335954	115	0.177672	0.325375	105	0.198685	0.325571	78
-23	0.001675	0.369775	120	0.075917	0.366996	107	0.086233	0.401164	77		0.258258	0.33843	115	0.189267	0.323804	105	0.210451	0.327317	78
-22	0.003737	0.371972	120	0.079082	0.370387	107	0.091212	0.402931	77		0.265592	0.341029	115	0.200811	0.322198	105	0.221907	0.328999	78
-21	0.005682	0.374107	120	0.082435	0.373836	107	0.096311	0.404561	77		0.272527	0.343691	115	0.212282	0.320604	105	0.233059	0.330693	78
-20	0.007544	0.376161	120	0.086048	0.377357	107	0.101545	0.406031	77		0.279086	0.346357	115	0.223678	0.319047	105	0.243928	0.33246	78
-19	0.009373	0.378121	120	0.090001	0.380944	107	0.10693	0.407324	77		0.28531	0.348971	115	0.235009	0.317535	105	0.254538	0.334352	78
-18	0.011231	0.379978	120	0.094364	0.384571	107	0.112484	0.408432	77		0.291247	0.351481	115	0.246281	0.31607	105	0.264911	0.336422	78
-17	0.013185	0.381719	120	0.09918	0.388192	107	0.118219	0.409356	77		0.296935	0.353847	115	0.257485	0.314664	105	0.275052	0.33873	78
-16	0.015284	0.383317	120	0.104454	0.39175	107	0.124137	0.410112	77		0.302396	0.356048	115	0.268592	0.313339	105	0.284945	0.341346	78
-15	0.017565	0.384734	120	0.110153	0.395183	107	0.130221	0.410735	77		0.307626	0.358086	115	0.279561	0.312122	105	0.294557	0.344332	78
-14	0.020055	0.385911	120	0.116221	0.39843	107	0.136435	0.411274	77		0.312615	0.359978	115	0.290345	0.31103	105	0.303838	0.347738	78
-13	0.022773	0.386786	120	0.122588	0.401436	107	0.142727	0.411779	77		0.317352	0.361744	115	0.300894	0.310079	105	0.312741	0.35158	78
-12	0.025732	0.387308	120	0.129179	0.404164	107	0.149044	0.412294	77		0.321834	0.363407	115	0.311171	0.309307	105	0.321236	0.355844	78
-11	0.028937	0.387464	120	0.135918	0.406595	107	0.155353	0.412845	77		0.326079	0.364982	115	0.321155	0.308777	105	0.329323	0.36048	78
-10	0.03238	0.387298	120	0.142731	0.408735	107	0.161644	0.413443	77		0.330137	0.366466	115	0.330846	0.308584	105	0.337038	0.365421	78
-9	0.036035	0.386907	120	0.149539	0.410617	107	0.167942	0.414082	77		0.33408	0.367842	115	0.340264	0.308853	105	0.344439	0.370595	78
-8	0.039859	0.386423	120	0.156246	0.412308	107	0.174303	0.414733	77		0.337992	0.36908	115	0.349435	0.30973	105	0.351587	0.375944	78
-7	0.043802	0.385986	120	0.16273	0.413908	107	0.180816	0.415359	77		0.341948	0.37016	115	0.358375	0.31136	105	0.35852	0.381419	78
-6	0.04782	0.38573	120	0.168846	0.415532	107	0.187585	0.415927	77		0.34599	0.371093	115	0.367066	0.313853	105	0.365247	0.386969	78
-5	0.05188	0.385765	120	0.174429	0.417279	107	0.194711	0.41642	77		0.350114	0.371942	115	0.375443	0.317265	105	0.371755	0.39252	78
-4	0.055953	0.386165	120	0.179297	0.419203	107	0.202275	0.416847	77		0.354259	0.372802	115	0.383397	0.321588	105	0.378009	0.39796	78
-3	0.060016	0.386964	120	0.183275	0.421312	107	0.210323	0.417238	77		0.358321	0.373773	115	0.390784	0.326766	105	0.383934	0.403152	78
-2	0.064057	0.388166	120	0.186203	0.423581	107	0.218859	0.417643	77		0.36215	0.374937	115	0.397444	0.332707	105	0.389419	0.407948	78
-1	0.068067	0.389759	120	0.187955	0.425978	107	0.227832	0.418127	77		0.365559	0.376351	115	0.403221	0.339314	105	0.394319	0.412219	78
0	0.072041	0.391735	120	0.188456	0.428478	107	0.237144	0.418762	77		0.36833	0.378064	115	0.407975	0.3465	105	0.398482	0.41587	78
1	0.0709	0.38994	120	0.185089	0.424017	107	0.238753	0.414562	77		0.359875	0.375168	115	0.40378	0.346422	105	0.398659	0.412587	78
2	0.069735	0.388084	120	0.180562	0.419409	107	0.240133	0.410356	77		0.350396	0.372104	115	0.398298	0.346454	105	0.397826	0.408815	78
3	0.068603	0.386224	120	0.175014	0.414783	107	0.241245	0.406273	77		0.339886	0.368899	115	0.391589	0.346653	105	0.395968	0.404649	78
4	0.067534	0.38446	120	0.168626	0.410302	107	0.24203	0.402418	77		0.328353	0.365626	115	0.383755	0.347082	105	0.393088	0.400221	78
5	0.066542	0.382891	120	0.161619	0.406129	107	0.242416	0.398844	77		0.315819	0.36238	115	0.374936	0.347776	105	0.389226	0.395675	78
6	0.065628	0.381583	120	0.154251	0.402389	107	0.242322	0.395552	77		0.302337	0.359255	115	0.365291	0.348726	105	0.38447	0.39114	78
7	0.06479	0.380541	120	0.146808	0.39913	107	0.241668	0.392508	77		0.287994	0.356321	115	0.354994	0.34988	105	0.378958	0.386714	78
8	0.064022	0.37971	120	0.139569	0.396297	107	0.240381	0.389662	77		0.272911	0.35363	115	0.344223	0.351147	105	0.372856	0.382458	78
9	0.063325	0.378993	120	0.132764	0.393734	107	0.238419	0.38696	77		0.257232	0.351205	115	0.333137	0.352426	105	0.366311	0.3784	78
10	0.062706	0.378292	120	0.126547	0.391213	107	0.235782	0.384352	77		0.241114	0.349045	115	0.321864	0.353621	105	0.35942	0.374533	78
11	0.06218	0.377535	120	0.121001	0.388485	107	0.232513	0.381785	77		0.224714	0.347123	115	0.310498	0.354641	105	0.352222	0.370827	78
12	0.061762	0.376687	120	0.116151	0.385334	107	0.228692	0.379202	77		0.208192	0.34538	115	0.299107	0.355398	105	0.344714	0.367226	78
13	0.06146	0.375738	120	0.111988	0.381606	107	0.224404	0.376549	77		0.191697	0.343733	115	0.287755	0.355813	105	0.336866	0.36366	78
14	0.061272	0.374704	120	0.108476	0.377233	107	0.219739	0.373781	77		0.175355	0.342087	115	0.276504	0.355825	105	0.328629	0.360066	78
15	0.061177	0.373622	120	0.105549	0.37222	107	0.214779	0.370861	77		0.159264	0.340359	115	0.265405	0.355411	105	0.319935	0.356406	78
16	0.061136	0.372549	120	0.103119	0.366635	107	0.209591	0.367763	77		0.143484	0.338492	115	0.254489	0.354596	105	0.310708	0.35268	78
17	0.06109	0.371576	120	0.101072	0.360589	107	0.204228	0.364467	77		0.128048	0.336472	115	0.243753	0.353463	105	0.300878	0.348908	78
18	0.060959	0.37081	120	0.099265	0.354218	107	0.198725	0.360948	77		0.112976	0.334319	115	0.233168	0.352126	105	0.290408	0.345112	78
19	0.060663	0.370358	120	0.097525	0.347659	107	0.193114	0.357182	77		0.09829	0.332077	115	0.222678	0.350712	105	0.279287	0.341303	78
20	0.060137	0.370287	120	0.095669	0.341039	107	0.187423	0.353146	77		0.084025	0.329799	115	0.212205	0.349339	105	0.26753	0.337476	78
21	0.059336	0.370597	120	0.093525	0.33447	107	0.181669	0.34883	77		0.070234	0.32754	115	0.201652	0.34812	105	0.25516	0.333619	78
22	0.05824	0.371213	120	0.090947	0.328052	107	0.175851	0.344233	77		0.056971	0.325358	115	0.190911	0.347149	105	0.2422	0.329709	78
23	0.056853	0.371999	120	0.087832	0.321875	107	0.169958	0.339367	77		0.044264	0.323308	115	0.179884	0.346488	105	0.228678	0.325721	78
24	0.055217	0.372791	120	0.084116	0.316023	107	0.163972	0.334264	77		0.032106	0.321431	115	0.168505	0.346142	105	0.214641	0.321618	78
25	0.053415	0.373427	120	0.07977	0.310563	107	0.157883	0.328975	77		0.020449	0.319749	115	0.156741	0.346072	105	0.200179	0.31736	78
26	0.05155	0.373775	120	0.074802	0.305532	107	0.151676	0.323578	77		0.009226	0.318263	115	0.144594	0.346211	105	0.185432	0.312923	78
27	0.049718	0.373744	120	0.069259	0.300945	107	0.145337	0.318181	77		-0.00163	0.316959	115	0.132092	0.346478	105	0.170596	0.308311	78
28	0.047984	0.37329	120	0.063226	0.296806	107	0.138853	0.312908	77		-0.01218	0.315817	115	0.119291	0.346793	105	0.155891	0.303563	78
29	0.046372	0.372412	120	0.05682	0.293122	107	0.132208	0.307872	77		-0.02243	0.314808	115	0.106264	0.347083	105	0.141514	0.298749	78
30	0.044874	0.371134	120	0.05017	0.289904	107	0.125379	0.303154	77		-0.03242	0.3139	115	0.093094	0.347285	105	0.127606	0.293948	78
31	0.043467	0.369488	120	0.043406	0.287163	107	0.11833	0.298792	77		-0.04211	0.313053	115	0.079865	0.347353	105	0.11424	0.289247	78
32	0.042105	0.367509	120	0.03665	0.284888	107	0.11102	0.294772	77		-0.05149	0.312233	115	0.066646	0.347246	105	0.101427	0.284731	78
33	0.040725	0.365226	120	0.030001	0.283042	107	0.103434	0.291034	77		-0.06053	0.311412	115	0.053489	0.346915	105	0.089139	0.280489	78
34	0.039241	0.362654	120	0.023527	0.281567	107	0.095611	0.287471	77		-0.06919	0.310572	115	0.040427	0.346297	105	0.077334	0.276606	78
35	0.037576	0.35979	120	0.017265	0.280397	107	0.087648	0.283953	77		-0.07745	0.309704	115	0.027464	0.345325	105	0.065957	0.273145	78
36	0.035686	0.356617	120	0.011231	0.279459	107	0.079688	0.280343	77		-0.08529	0.308802	115	0.014583	0.343943	105	0.054959	0.270127	78
37	0.033564	0.353118	120	0.005431	0.278676	107	0.071894	0.276534	77		-0.0927	0.307872	115	0.001768	0.342128	105	0.044298	0.26753	78
38	0.031235	0.349288	120	-0.00014	0.277975	107	0.064432	0.272476	77		-0.09965	0.306942	115	-0.01097	0.339905	105	0.033932	0.265293	78
39	0.028737	0.34514	120	-0.00549	0.277286	107	0.057454	0.268194	77		-0.10616	0.306054	115	-0.02357	0.33735	105	0.023813	0.263334	78
40	0.026102	0.340721	120	-0.01066	0.276546	107	0.051084	0.263779	77		-0.11224	0.305256	115	-0.03595	0.334576	105	0.013889	0.261565	78
41	0.023347	0.336114	120	-0.0157	0.275708	107	0.045398	0.259361	77		-0.11791	0.304574	115	-0.04798	0.331699	105	0.004102	0.259909	78
42	0.020469	0.331428	120	-0.02067	0.274749	107	0.040411	0.255067	77		-0.12319	0.304008	115	-0.05956	0.328792	105	-0.0056	0.258313	78
43	0.017446	0.32678	120	-0.02562	0.273688	107	0.036072	0.250991	77		-0.1281	0.303525	115	-0.07057	0.325862	105	-0.01526	0.256745	78
44	0.014249	0.322269	120	-0.03059	0.272576	107	0.032276	0.2472	77		-0.13261	0.303073	115	-0.08091	0.322847	105	-0.02491	0.255202	78
45	0.010848	0.317977	120	-0.03558	0.271487	107	0.028884	0.243757	77		-0.13675	0.302595	115	-0.09051	0.319645	105	-0.03458	0.253707	78
46	0.007238	0.313964	120	-0.04062	0.270498	107	0.025755	0.240735	77		-0.1405	0.302036	115	-0.09932	0.316146	105	-0.0443	0.252299	78
47	0.00345	0.310259	120	-0.04573	0.26968	107	0.022757	0.238197	77		-0.14387	0.301345	115	-0.1073	0.312266	105	-0.05408	0.251025	78
48	-0.00045	0.306851	120	-0.05093	0.269104	107	0.019782	0.236173	77		-0.14691	0.300486	115	-0.11446	0.307975	105	-0.06398	0.249919	78
49	-0.00435	0.303689	120	-0.05621	0.268837	107	0.016746	0.234642	77		-0.14963	0.299451	115	-0.12084	0.3033	105	-0.07404	0.248985	78
50	-0.00816	0.300684	120	-0.06154	0.268937	107	0.013598	0.233555	77		-0.15208	0.298252	115	-0.12651	0.298313	105	-0.0843	0.248196	78
51	-0.01175	0.297737	120	-0.06687	0.269434	107	0.010319	0.232845	77		-0.15431	0.296918	115	-0.13157	0.293115	105	-0.09474	0.247507	78
52	-0.01502	0.294759	120	-0.07212	0.270305	107	0.006913	0.232438	77		-0.15635	0.295484	115	-0.13613	0.287818	105	-0.10526	0.246878	78
53	-0.01788	0.291696	120	-0.0772	0.271455	107	0.0034	0.232263	77		-0.15823	0.29399	115	-0.1403	0.282546	105	-0.11578	0.246283	78
54	-0.02028	0.288528	120	-0.08198	0.272707	107	-0.0002	0.232259	77		-0.15997	0.292472	115	-0.1442	0.277419	105	-0.12617	0.245709	78
55	-0.02218	0.285275	120	-0.08634	0.273821	107	-0.00386	0.232387	77		-0.16157	0.290961	115	-0.14794	0.272543	105	-0.13629	0.245144	78
56	-0.02363	0.281988	120	-0.09015	0.274528	107	-0.00759	0.232628	77		-0.16301	0.289468	115	-0.15157	0.268004	105	-0.14599	0.244571	78
57	-0.0247	0.278741	120	-0.0933	0.274593	107	-0.01138	0.232987	77		-0.16427	0.28798	115	-0.15513	0.263872	105	-0.15513	0.243959	78
58	-0.0255	0.275612	120	-0.09571	0.273884	107	-0.01528	0.233495	77		-0.16529	0.286454	115	-0.1586	0.260195	105	-0.16358	0.243264	78
59	-0.02615	0.272657	120	-0.09735	0.272423	107	-0.01931	0.234207	77		-0.16603	0.284836	115	-0.16194	0.256998	105	-0.17126	0.242445	78
60	-0.02676	0.269891	120	-0.09824	0.270391	107	-0.02351	0.235186	77		-0.16642	0.283075	115	-0.16504	0.254279	105	-0.17809	0.241487	78
61	-0.02743	0.267281	120	-0.09848	0.268071	107	-0.0279	0.236489	77		-0.16644	0.281154	115	-0.16781	0.252007	105	-0.18405	0.240426	78
62	-0.02823	0.264755	120	-0.09822	0.265762	107	-0.03243	0.238149	77		-0.16603	0.279097	115	-0.1701	0.250129	105	-0.18915	0.239349	78
63	-0.02921	0.262226	120	-0.09763	0.26369	107	-0.03705	0.24018	77		-0.1652	0.276964	115	-0.17179	0.248578	105	-0.19348	0.238365	78
64	-0.03037	0.259614	120	-0.09685	0.261972	107	-0.04168	0.242584	77		-0.16396	0.274835	115	-0.17277	0.247278	105	-0.19712	0.237554	78
65	-0.03167	0.256872	120	-0.096	0.260608	107	-0.04621	0.24534	77		-0.16234	0.272787	115	-0.17298	0.246153	105	-0.20015	0.236942	78
66	-0.03309	0.253987	120	-0.09513	0.259505	107	-0.05055	0.248383	77		-0.16038	0.270865	115	-0.17243	0.245123	105	-0.20262	0.23652	78
67	-0.03458	0.250981	120	-0.09429	0.258526	107	-0.05463	0.251597	77		-0.15811	0.26906	115	-0.17117	0.244128	105	-0.20457	0.236269	78
68	-0.03608	0.247914	120	-0.09346	0.25754	107	-0.05839	0.254834	77		-0.15558	0.267314	115	-0.16929	0.243136	105	-0.20604	0.236188	78
69	-0.03752	0.244881	120	-0.09265	0.256465	107	-0.06177	0.257933	77		-0.15283	0.265536	115	-0.16688	0.242146	105	-0.20704	0.236288	78
70	-0.03882	0.242006	120	-0.09184	0.255279	107	-0.06476	0.260737	77		-0.1499	0.26363	115	-0.16408	0.241173	105	-0.20759	0.236556	78
71	-0.03995	0.239415	120	-0.09103	0.254002	107	-0.06733	0.263103	77		-0.14678	0.261528	115	-0.16103	0.240237	105	-0.20771	0.236915	78
72	-0.04085	0.237212	120	-0.09022	0.25267	107	-0.06951	0.264909	77		-0.14345	0.259203	115	-0.15788	0.239357	105	-0.20742	0.23722	78
73	-0.0415	0.235469	120	-0.0894	0.2513	107	-0.07138	0.266077	77		-0.13982	0.256666	115	-0.15479	0.238558	105	-0.2067	0.237294	78
74	-0.04186	0.234229	120	-0.08857	0.249886	107	-0.07299	0.266581	77		-0.13582	0.253971	115	-0.15187	0.237868	105	-0.20554	0.237014	78
75	-0.04192	0.233508	120	-0.08771	0.248415	107	-0.07444	0.26644	77		-0.13142	0.251211	115	-0.14916	0.237296	105	-0.20394	0.236371	78
76	-0.04167	0.233301	120	-0.08682	0.246876	107	-0.07577	0.265709	77		-0.12657	0.24851	115	-0.14666	0.236814	105	-0.2019	0.235468	78
77	-0.04112	0.233573	120	-0.08588	0.245268	107	-0.07701	0.264465	77		-0.12129	0.245985	115	-0.14433	0.236355	105	-0.19946	0.234485	78
78	-0.04026	0.234262	120	-0.08485	0.243603	107	-0.07816	0.262807	77		-0.11561	0.243708	115	-0.14211	0.235832	105	-0.19662	0.233617	78
79	-0.03915	0.235281	120	-0.08369	0.241906	107	-0.07923	0.260838	77		-0.1096	0.241691	115	-0.13993	0.23515	105	-0.1934	0.23302	78
80	-0.03781	0.236534	120	-0.08235	0.240212	107	-0.08019	0.258663	77		-0.10332	0.239901	115	-0.13767	0.23422	105	-0.18978	0.232775	78
81	-0.0363	0.237939	120	-0.08079	0.238559	107	-0.08106	0.256376	77		-0.09687	0.238276	115	-0.13523	0.232989	105	-0.18571	0.232881	78
82	-0.03465	0.23944	120	-0.07898	0.236983	107	-0.08185	0.254045	77		-0.09034	0.236738	115	-0.13252	0.231445	105	-0.18117	0.233261	78
83	-0.03292	0.241001	120	-0.07693	0.235507	107	-0.08253	0.251699	77		-0.08385	0.235198	115	-0.12949	0.229606	105	-0.17616	0.233795	78
84	-0.03117	0.242588	120	-0.07463	0.234144	107	-0.08311	0.249332	77		-0.07746	0.233562	115	-0.12612	0.227498	105	-0.17071	0.234364	78
85	-0.02942	0.244166	120	-0.07211	0.232889	107	-0.08358	0.246919	77		-0.07126	0.231747	115	-0.12243	0.225155	105	-0.16488	0.234885	78
86	-0.02771	0.245698	120	-0.06941	0.231723	107	-0.08392	0.244434	77		-0.06529	0.22969	115	-0.11849	0.22261	105	-0.15877	0.235322	78
87	-0.02606	0.247149	120	-0.06655	0.230619	107	-0.08414	0.241869	77		-0.05957	0.227354	115	-0.11434	0.219903	105	-0.15249	0.235672	78
88	-0.02447	0.248482	120	-0.06361	0.229555	107	-0.08422	0.23923	77		-0.05409	0.224729	115	-0.11005	0.217073	105	-0.14618	0.235948	78
89	-0.02294	0.249655	120	-0.06065	0.228531	107	-0.08417	0.236522	77		-0.04884	0.221832	115	-0.10566	0.21416	105	-0.13993	0.23616	78
90	-0.02145	0.250619	120	-0.05772	0.227566	107	-0.08398	0.233731	77		-0.04379	0.218714	115	-0.10121	0.211192	105	-0.13385	0.236304	78
91	-0.02001	0.25131	120	-0.05487	0.226694	107	-0.08366	0.230828	77		-0.03894	0.215441	115	-0.09675	0.208186	105	-0.12801	0.236356	78
92	-0.01862	0.251648	120	-0.05211	0.225939	107	-0.08322	0.227785	77		-0.03429	0.212084	115	-0.09232	0.205154	105	-0.12247	0.236287	78
93	-0.0173	0.251563	120	-0.04943	0.225314	107	-0.08266	0.22459	77		-0.02985	0.208705	115	-0.08796	0.202126	105	-0.11726	0.236069	78
94	-0.01605	0.25101	120	-0.04679	0.224814	107	-0.08198	0.22126	77		-0.02565	0.205348	115	-0.08372	0.199161	105	-0.11241	0.235676	78
95	-0.01483	0.249972	120	-0.04416	0.224423	107	-0.0812	0.217842	77		-0.02174	0.202044	115	-0.07964	0.196331	105	-0.1079	0.235079	78
96	-0.01363	0.248443	120	-0.04153	0.224105	107	-0.08029	0.214399	77		-0.01817	0.198818	115	-0.07574	0.19369	105	-0.10365	0.234242	78
97	-0.0124	0.246421	120	-0.03884	0.223809	107	-0.07924	0.210987	77		-0.01499	0.195692	115	-0.07208	0.191256	105	-0.09959	0.233123	78
98	-0.01112	0.243902	120	-0.03607	0.223472	107	-0.07805	0.207648	77		-0.01225	0.192697	115	-0.0687	0.189003	105	-0.0956	0.231683	78
99	-0.00978	0.240882	120	-0.03318	0.223029	107	-0.07673	0.204403	77		-0.00996	0.189864	115	-0.06562	0.186873	105	-0.0916	0.229886	78
100	-0.00833	0.237358	120	-0.03014	0.222419	107	-0.07533	0.201243	77		-0.00813	0.187209	115	-0.06286	0.184799	105	-0.08757	0.227702	78
101	-0.00678	0.233349	120	-0.02696	0.2216	107	-0.0739	0.198128	77		-0.00673	0.184726	115	-0.06041	0.182723	105	-0.08353	0.225105	78
102	-0.00511	0.228913	120	-0.02367	0.220566	107	-0.07251	0.194996	77		-0.00568	0.182388	115	-0.05825	0.180611	105	-0.07953	0.222082	78
103	-0.00335	0.22415	120	-0.02032	0.219348	107	-0.07123	0.191786	77		-0.00492	0.180167	115	-0.05635	0.178453	105	-0.07562	0.218635	78
104	-0.00154	0.219204	120	-0.01699	0.218018	107	-0.07012	0.18847	77		-0.00438	0.178054	115	-0.05467	0.17627	105	-0.07182	0.214779	78
105	0.000266	0.214256	120	-0.01373	0.216666	107	-0.06921	0.185041	77		-0.004	0.176054	115	-0.05318	0.174111	105	-0.06815	0.210557	78
106	0.00197	0.209515	120	-0.01058	0.215375	107	-0.06852	0.181514	77		-0.00377	0.174182	115	-0.05183	0.172055	105	-0.06459	0.206047	78
107	0.003488	0.205203	120	-0.0076	0.214194	107	-0.06803	0.177922	77		-0.00371	0.172446	115	-0.05057	0.170202	105	-0.06117	0.201371	78
108	0.004744	0.201517	120	-0.00482	0.213125	107	-0.06769	0.174328	77		-0.00381	0.17084	115	-0.04937	0.168674	105	-0.05789	0.196677	78
109	0.005697	0.198593	120	-0.00228	0.212126	107	-0.06743	0.170822	77		-0.00409	0.16935	115	-0.04819	0.167587	105	-0.05477	0.192124	78
110	0.006338	0.196472	120	-3.11e-05	0.211121	107	-0.06717	0.167498	77		-0.0045	0.167952	115	-0.04701	0.167016	105	-0.05181	0.187842	78
111	0.006689	0.195099	120	0.001872	0.210019	107	-0.06686	0.164426	77		-0.00502	0.166617	115	-0.04579	0.166965	105	-0.04901	0.183922	78
112	0.006793	0.194349	120	0.003388	0.20873	107	-0.06644	0.161639	77		-0.0056	0.165308	115	-0.04452	0.167359	105	-0.04635	0.180412	78
113	0.006725	0.194062	120	0.004496	0.207189	107	-0.06586	0.159142	77		-0.0062	0.16398	115	-0.04318	0.168065	105	-0.04382	0.177331	78
114	0.006584	0.194074	120	0.005197	0.205372	107	-0.06508	0.156919	77		-0.00679	0.162579	115	-0.0418	0.168926	105	-0.04137	0.174688	78
115	0.006474	0.194244	120	0.00551	0.203297	107	-0.06408	0.154935	77		-0.00731	0.161062	115	-0.04039	0.169785	105	-0.03897	0.172492	78
116	0.006492	0.194466	120	0.005462	0.20102	107	-0.06284	0.153118	77		-0.00774	0.159402	115	-0.03898	0.170497	105	-0.03656	0.170739	78
117	0.006722	0.194658	120	0.005086	0.198621	107	-0.06137	0.151372	77		-0.00806	0.157598	115	-0.03759	0.170935	105	-0.0341	0.169405	78
118	0.007224	0.194732	120	0.004411	0.196182	107	-0.05971	0.14959	77		-0.00827	0.15567	115	-0.0362	0.170995	105	-0.03158	0.16844	78
119	0.008029	0.194569	120	0.003474	0.193777	107	-0.05789	0.147666	77		-0.00839	0.153648	115	-0.03478	0.170609	105	-0.02902	0.167774	78
120	0.009123	0.194022	120	0.00232	0.191449	107	-0.05593	0.145509	77		-0.00844	0.151572	115	-0.03331	0.169755	105	-0.02645	0.167328	78
121	0.010444	0.192953	120	0.001004	0.189201	107	-0.05388	0.143054	77		-0.00842	0.149487	115	-0.03177	0.168454	105	-0.02392	0.167019	78
122	0.011888	0.191259	120	-0.00042	0.186994	107	-0.05179	0.140266	77		-0.00834	0.147449	115	-0.0302	0.166765	105	-0.02148	0.166761	78
123	0.013332	0.188889	120	-0.00189	0.184769	107	-0.04966	0.137137	77		-0.0082	0.145517	115	-0.02861	0.164767	105	-0.01917	0.166464	78
124	0.014653	0.185855	120	-0.00337	0.182466	107	-0.04753	0.133671	77		-0.00803	0.143735	115	-0.02706	0.162552	105	-0.01699	0.166038	78
125	0.015742	0.182224	120	-0.0048	0.18004	107	-0.04539	0.129906	77		-0.00785	0.142118	115	-0.02558	0.160237	105	-0.01493	0.165386	78
126	0.01652	0.1781	120	-0.00616	0.177473	107	-0.04326	0.125923	77		-0.00771	0.140664	115	-0.02418	0.157951	105	-0.01296	0.164408	78
127	0.016938	0.17362	120	-0.00737	0.174784	107	-0.04115	0.121853	77		-0.00764	0.139349	115	-0.02288	0.155818	105	-0.01103	0.163019	78
128	0.016982	0.168944	120	-0.00838	0.172017	107	-0.03906	0.117851	77		-0.00767	0.138143	115	-0.02168	0.153913	105	-0.00914	0.161185	78
129	0.016671	0.164247	120	-0.00915	0.169224	107	-0.037	0.114052	77		-0.0078	0.137013	115	-0.02056	0.152243	105	-0.00732	0.158955	78
130	0.016047	0.159699	120	-0.00963	0.166446	107	-0.03497	0.110546	77		-0.008	0.135927	115	-0.01948	0.150747	105	-0.00562	0.156455	78
131	0.015176	0.155432	120	-0.0098	0.163702	107	-0.03294	0.10737	77		-0.00822	0.134855	115	-0.01842	0.149326	105	-0.00412	0.153844	78
132	0.014134	0.151521	120	-0.00964	0.160992	107	-0.0309	0.104521	77		-0.0084	0.133774	115	-0.01735	0.147871	105	-0.00289	0.151243	78
133	0.013006	0.147985	120	-0.00914	0.158302	107	-0.02885	0.101964	77		-0.0085	0.132659	115	-0.01625	0.146287	105	-0.00196	0.14868	78
134	0.011883	0.144802	120	-0.00831	0.155623	107	-0.02678	0.099658	77		-0.00846	0.13149	115	-0.01515	0.144496	105	-0.00135	0.146083	78
135	0.010847	0.141922	120	-0.00715	0.152959	107	-0.0247	0.097567	77		-0.00826	0.130248	115	-0.01406	0.142458	105	-0.00101	0.143331	78
136	0.009953	0.139257	120	-0.0057	0.150319	107	-0.02265	0.095656	77		-0.00784	0.128915	115	-0.01297	0.140168	105	-0.00086	0.14032	78
137	0.009225	0.136693	120	-0.00399	0.147707	107	-0.02065	0.093893	77		-0.00719	0.12746	115	-0.01185	0.137634	105	-0.00081	0.136991	78
138	0.00866	0.134124	120	-0.0021	0.145116	107	-0.01876	0.092237	77		-0.00628	0.125839	115	-0.01065	0.134853	105	-0.00077	0.133331	78
139	0.00824	0.13147	120	-5.58e-05	0.142518	107	-0.01699	0.090636	77		-0.00509	0.123997	115	-0.00932	0.131805	105	-0.00066	0.129362	78
140	0.007949	0.128685	120	0.002077	0.139876	107	-0.01535	0.089017	77		-0.0036	0.121889	115	-0.00781	0.128459	105	-0.00041	0.125129	78
141	0.00779	0.125753	120	0.004261	0.137144	107	-0.01382	0.087306	77		-0.00182	0.119503	115	-0.00606	0.124788	105	-1.54e-06	0.120696	78
142	0.007784	0.122697	120	0.006464	0.134282	107	-0.01239	0.085446	77		0.000214	0.116858	115	-0.00409	0.120792	105	0.000563	0.116126	78
143	0.007943	0.119582	120	0.008667	0.131277	107	-0.01106	0.083406	77		0.002467	0.11399	115	-0.00191	0.116504	105	0.00125	0.111469	78
144	0.008256	0.1165	120	0.010855	0.128155	107	-0.00982	0.08118	77		0.004888	0.110932	115	0.000401	0.111951	105	0.002023	0.10674	78
145	0.008679	0.11354	120	0.013013	0.124967	107	-0.00867	0.078776	77		0.007424	0.107701	115	0.002791	0.107148	105	0.002847	0.101921	78
146	0.009141	0.110756	120	0.015116	0.121784	107	-0.00761	0.076207	77		0.010013	0.104294	115	0.005188	0.102113	105	0.003696	0.096973	78
147	0.009559	0.108146	120	0.017123	0.118673	107	-0.00658	0.073479	77		0.012599	0.100683	115	0.007534	0.096892	105	0.004555	0.091856	78
148	0.009849	0.105639	120	0.018975	0.115682	107	-0.00556	0.070591	77		0.01512	0.096837	115	0.009787	0.091576	105	0.005423	0.086561	78
149	0.009943	0.103107	120	0.0206	0.112813	107	-0.00451	0.067553	77		0.017514	0.092746	115	0.011923	0.086299	105	0.006305	0.081116	78
150	0.009801	0.100395	120	0.021923	0.109972	107	-0.00342	0.064394	77		0.019717	0.088434	115	0.013937	0.081218	105	0.007201	0.07558	78
151	0.009404	0.097338	120	0.022869	0.106966	107	-0.0023	0.061156	77		0.021652	0.083943	115	0.015833	0.076463	105	0.0081	0.070025	78
152	0.008752	0.09378	120	0.023375	0.103526	107	-0.00117	0.057861	77		0.023238	0.07931	115	0.017593	0.072097	105	0.008975	0.064521	78
153	0.007872	0.089575	120	0.023396	0.099366	107	-5.58e-05	0.05449	77		0.024381	0.074534	115	0.019162	0.068076	105	0.009782	0.059118	78
154	0.006825	0.084596	120	0.022911	0.09423	107	0.001006	0.050965	77		0.024985	0.069568	115	0.020441	0.064243	105	0.010447	0.05383	78
155	0.005699	0.078742	120	0.021921	0.087923	107	0.001979	0.047176	77		0.024961	0.06433	115	0.021297	0.060325	105	0.010878	0.048628	78
156	0.00459	0.071941	120	0.020445	0.080334	107	0.002817	0.043016	77		0.024231	0.0587	115	0.021576	0.05599	105	0.010974	0.043447	78
157	0.003582	0.06415	120	0.018507	0.07144	107	0.003457	0.038398	77		0.022744	0.052527	115	0.021121	0.050932	105	0.01066	0.038195	78
158	0.002726	0.055373	120	0.016143	0.061318	107	0.003823	0.033274	77		0.02049	0.045662	115	0.019798	0.04494	105	0.009898	0.032764	78
159	0.002032	0.045662	120	0.0134	0.050138	107	0.003849	0.02762	77		0.017506	0.038009	115	0.017524	0.037906	105	0.008685	0.027044	78
160	0.001473	0.035116	120	0.010343	0.038146	107	0.003486	0.021441	77		0.013863	0.029545	115	0.014301	0.029819	105	0.007044	0.020938	78
161	0.000995	0.023876	120	0.007048	0.025625	107	0.002714	0.014748	77		0.00966	0.020324	115	0.010208	0.020737	105	0.005015	0.014395	78
162	0.000527	0.01211	120	0.003583	0.012839	107	0.001541	0.007577	77		0.005003	0.01044	115	0.005382	0.010759	105	0.00265	0.007408	78

## Sheet: Figure8H
			Saline							Diazepam
		Risk of shock(%)	Mean (peak of cross correlation function)	SD	N	95% CI (lower,upper)		Risk of shock(%)	Mean (peak of cross correlation function)	SD	N	95% CI (lower,upper)
		0	-0.08024	0.258866	120	(-.13, -.03)		0	0.36833	0.373773	115	(.30, .44)
		6	0.188456	0.421312	107	(.11, .27)		6	0.407975	0.326766	105	(.35, .47)
		10	0.242416	0.410356	77	(.15, .33)		10	0.398659	0.407948	78	(.31, .49)

## Sheet: Figure 8 - supplement 1
		Saline			Diazpam
	Lag (1 unit = .0244 sec)	MEAN	SD	N	MEAN	SD	N
	-52	-0.00103	0.018211	23	-0.00571	0.033613	22
	-51	-0.00168	0.033862	23	-0.01269	0.065113	22
	-50	-0.00214	0.047186	23	-0.02095	0.093613	22
	-49	-0.00272	0.058603	23	-0.03047	0.118828	22
	-48	-0.00383	0.068619	23	-0.04101	0.141428	22
	-47	-0.00586	0.077764	23	-0.05215	0.162503	22
	-46	-0.00907	0.086589	23	-0.06337	0.182828	22
	-45	-0.01359	0.095699	23	-0.07421	0.202609	22
	-44	-0.01947	0.105671	23	-0.08439	0.221563	22
	-43	-0.02682	0.116749	23	-0.09376	0.239061	22
	-42	-0.03578	0.128663	23	-0.10231	0.254274	22
	-41	-0.04649	0.140896	23	-0.11013	0.266335	22
	-40	-0.05897	0.15306	23	-0.11736	0.274583	22
	-39	-0.07308	0.164953	23	-0.12406	0.278791	22
	-38	-0.08864	0.176325	23	-0.13018	0.279186	22
	-37	-0.10535	0.186742	23	-0.13569	0.276222	22
	-36	-0.12286	0.195746	23	-0.14066	0.270325	22
	-35	-0.14073	0.203111	23	-0.14525	0.261837	22
	-34	-0.15844	0.208946	23	-0.14971	0.251132	22
	-33	-0.17557	0.213614	23	-0.15435	0.238802	22
	-32	-0.19182	0.217498	23	-0.15952	0.225943	22
	-31	-0.20707	0.22074	23	-0.16534	0.21423	22
	-30	-0.22128	0.223137	23	-0.17167	0.205457	22
	-29	-0.23432	0.224399	23	-0.17813	0.200869	22
	-28	-0.2459	0.224612	23	-0.18431	0.200833	22
	-27	-0.25554	0.224436	23	-0.18988	0.204914	22
	-26	-0.26262	0.224814	23	-0.19459	0.212216	22
	-25	-0.26652	0.22652	23	-0.1983	0.221733	22
	-24	-0.26665	0.229856	23	-0.20089	0.23245	22
	-23	-0.26255	0.234553	23	-0.20218	0.243407	22
	-22	-0.254	0.239799	23	-0.20178	0.253902	22
	-21	-0.24106	0.244478	23	-0.1991	0.263723	22
	-20	-0.22393	0.247551	23	-0.19347	0.273204	22
	-19	-0.20284	0.248405	23	-0.18426	0.283033	22
	-18	-0.17801	0.24702	23	-0.17104	0.293811	22
	-17	-0.14969	0.24397	23	-0.15353	0.305636	22
	-16	-0.11809	0.240307	23	-0.13168	0.318004	22
	-15	-0.08339	0.23733	23	-0.1055	0.330041	22
	-14	-0.04566	0.236231	23	-0.07498	0.340932	22
	-13	-0.00493	0.237756	23	-0.03988	0.350249	22
	-12	0.038687	0.242219	23	9.48e-05	0.358005	22
	-11	0.084859	0.24983	23	0.045088	0.364545	22
	-10	0.133042	0.260844	23	0.09485	0.370414	22
	-9	0.182503	0.275374	23	0.148671	0.37623	22
	-8	0.232408	0.293194	23	0.205368	0.382604	22
	-7	0.281879	0.313722	23	0.263336	0.389939	22
	-6	0.330007	0.336115	23	0.320748	0.398128	22
	-5	0.37581	0.359425	23	0.375811	0.406493	22
	-4	0.418219	0.382762	23	0.42695	0.414162	22
	-3	0.456133	0.405404	23	0.472872	0.42063	22
	-2	0.488508	0.426828	23	0.512633	0.426195	22
	-1	0.514491	0.446743	23	0.54574	0.43203	22
	0	0.533597	0.465177	23	0.572221	0.439849	22
	1	0.5316	0.453668	23	0.561567	0.420029	22
	2	0.523754	0.442394	23	0.545269	0.404721	22
	3	0.510723	0.432435	23	0.523855	0.395381	22
	4	0.49324	0.424249	23	0.498004	0.392534	22
	5	0.47202	0.417441	23	0.468522	0.395372	22
	6	0.447683	0.410917	23	0.436321	0.401921	22
	7	0.420681	0.403274	23	0.402377	0.409658	22
	8	0.391277	0.393237	23	0.367652	0.41617	22
	9	0.359578	0.379973	23	0.33299	0.419525	22
	10	0.325621	0.363256	23	0.299038	0.418371	22
	11	0.289475	0.343533	23	0.266213	0.411892	22
	12	0.251369	0.32188	23	0.234725	0.399798	22
	13	0.211739	0.299824	23	0.204661	0.382374	22
	14	0.171179	0.279045	23	0.176108	0.360488	22
	15	0.130323	0.261097	23	0.149189	0.335479	22
	16	0.089732	0.247156	23	0.123962	0.308966	22
	17	0.049868	0.237791	23	0.100302	0.282659	22
	18	0.011149	0.232848	23	0.077928	0.258225	22
	19	-0.02596	0.231612	23	0.05649	0.237172	22
	20	-0.06092	0.233207	23	0.035583	0.220715	22
	21	-0.09312	0.23685	23	0.014738	0.209535	22
	22	-0.12201	0.241775	23	-0.00652	0.203495	22
	23	-0.14721	0.24708	23	-0.02854	0.201627	22
	24	-0.16854	0.251829	23	-0.05149	0.202524	22
	25	-0.1861	0.255302	23	-0.07532	0.2049	22
	26	-0.20019	0.257089	23	-0.09978	0.208	22
	27	-0.2112	0.256958	23	-0.12441	0.211631	22
	28	-0.21956	0.254761	23	-0.14863	0.21588	22
	29	-0.22557	0.250571	23	-0.17182	0.220756	22
	30	-0.22939	0.244913	23	-0.19337	0.226034	22
	31	-0.23107	0.238801	23	-0.21273	0.231333	22
	32	-0.23065	0.233493	23	-0.22941	0.23623	22
	33	-0.22814	0.230188	23	-0.24299	0.240287	22
	34	-0.22357	0.229776	23	-0.25317	0.243108	22
	35	-0.21702	0.232614	23	-0.25967	0.244394	22
	36	-0.2086	0.23833	23	-0.26233	0.243937	22
	37	-0.19847	0.245774	23	-0.26109	0.241587	22
	38	-0.1868	0.253182	23	-0.25609	0.237211	22
	39	-0.17373	0.258508	23	-0.24757	0.230683	22
	40	-0.15944	0.259866	23	-0.23588	0.22191	22
	41	-0.14419	0.255996	23	-0.22143	0.210907	22
	42	-0.12834	0.24657	23	-0.20475	0.197908	22
	43	-0.11234	0.232173	23	-0.18641	0.183367	22
	44	-0.09663	0.213956	23	-0.16695	0.167796	22
	45	-0.08157	0.193216	23	-0.14687	0.151551	22
	46	-0.06736	0.17109	23	-0.12658	0.134768	22
	47	-0.0541	0.148364	23	-0.10643	0.117454	22
	48	-0.04185	0.12536	23	-0.08671	0.099608	22
	49	-0.03072	0.101981	23	-0.06762	0.081248	22
	50	-0.02086	0.077916	23	-0.04935	0.062325	22
	51	-0.01244	0.052903	23	-0.03198	0.042654	22
	52	-0.00552	0.026885	23	-0.01556	0.021957	22
				23			23
				23			23
				23			23
				23			23
				23			23
				23			23
				23			23
				23			23
				23			23
				23			23
				23			23
				23			23
				23			23
				23			23
				23			23
				23			23
				23			23
				23			23
				23			23
				23			23
				23			23
				23			23
				23			23
				23			23
				23			23
				23			23
				23			23
				23			23
				23			23
				23			23
				23			23
				23			23
				23			23
				23			23
				23			23
				23			23
				23			23
				23			23
				23			23
				23			23
				23			23
				23			23
				23			23
				23			23
				23			23
				23			23
				23			23
				23			23
				23			23
				23			23
				23			23
				23			23
				23			23
				23			23
				23			23
				23			23
				23			23
				23			23
				23			23
				23			23
				23			23
				23			23
				23			23
				23			23
				23			23
				23			23
				23			23
				23			23
				23			23
				23			23
				23			23
				23			23
				23			23
				23			23
				23			23
				23			23
				23			23
				23			23
				23			23
				23			23
				23			23
				23			23
				23			23
				23			23
				23			23
				23			23
				23			23
				23			23
				23			23
				23			23
				23			23
				23			23
				23			23
				23			23
				23			23
				23			23
